# Supplementary material for: A functional gene module identification algorithm in gene expression data based on genetic algorithm and gene ontology
Source: BMC Genomics. 2023 Feb 17;24:76. doi: 10.1186/s12864-023-09157-z (PMC9936134; doi:10.1186/s12864-023-09157-z)
Supplement: Supplementary file 2 — Additional file 2: Table S2. The modules obtained by GMIGAGO of the six datasets. A sheet contains the result of a dataset. Rows denote genes, columns denote modules, and elements satisfy Formula 10. [file 12864_2023_9157_MOESM2_ESM.xlsx]

## Sheet: BRCA
Table S2 The modules obtained by GMIGAGO of the six datasets
A sheet contains the result of a dataset. Rows denote genes, columns denote modules, and elements satisfy Formula 10.
id	m0 (module B)	m1	m2 (module A)	m3 (module C)	m4	m5	m6 (module D)	m7	m8	m9	m10
A1BG	0	0	0	0	0	0	0	0	0	0	1
A2M-AS1	0	0	0	0	0	0	1	0	0	0	0
AASS	0	0	1	0	0	0	0	0	0	0	0
AATK	0	0	0	0	1	0	0	0	0	0	0
ABCA1	0	0	1	0	0	0	0	0	0	0	0
ABCA10	0	0	1	0	0	0	0	0	0	0	0
ABCA5	0	0	0	0	0	0	0	0	0	0	1
ABCB1	0	0	1	0	0	0	0	0	0	0	0
ABCB8	0	0	0	0	0	1	0	0	0	0	0
ABCB9	0	0	0	0	0	1	0	0	0	0	0
ABCC5	0	0	0	0	1	0	0	0	0	0	0
ABCC9	0	0	1	0	0	0	0	0	0	0	0
ABCG2	1	0	1	1	1	0	0	0	0	1	1
ABHD1	0	0	0	0	0	0	0	0	0	0	1
ABHD11	0	0	0	0	0	1	0	0	0	0	0
ABHD17C	0	0	0	0	1	0	0	0	0	0	0
ABHD6	0	0	0	0	1	0	0	0	0	0	0
ABI3BP	0	0	1	0	0	0	0	0	0	0	0
ABLIM1	0	1	0	0	0	0	0	0	0	0	0
ABLIM3	0	0	0	0	1	0	0	0	0	0	0
ABO	0	0	0	0	0	1	1	0	1	0	0
ABRAXAS1	0	0	0	0	1	0	0	0	0	0	0
ACAA2	0	0	0	0	0	0	0	1	0	0	0
ACACB	0	0	1	0	0	0	0	0	0	0	0
ACADS	0	0	0	0	0	1	0	0	0	0	0
ACAN	0	0	0	0	0	0	0	0	1	0	0
ACCS	0	0	0	0	0	0	0	0	0	0	1
ACKR3	0	0	1	0	0	0	0	0	0	0	0
ACKR4	0	0	1	0	0	0	0	0	0	0	0
ACO1	0	0	1	0	0	0	0	0	0	0	0
ACOT7	0	0	0	0	0	0	0	1	0	0	0
ACSL1	0	0	1	0	0	0	0	0	0	0	0
ACSL4	0	0	0	0	0	0	1	0	0	0	0
ACSL5	0	0	0	0	0	0	1	0	0	0	0
ACSM1	0	0	0	0	0	1	0	0	0	0	0
ACSM3	1	1	1	1	0	0	1	1	1	0	1
ACSS2	1	0	0	0	0	0	0	0	0	0	0
ACSS3	0	0	0	0	1	0	0	0	0	0	0
ACTA2-AS1	0	0	1	0	0	0	0	0	0	0	0
ACTG2	0	0	0	0	0	0	0	0	1	0	0
ACVR2A	0	0	1	0	0	0	0	0	0	0	0
ACVR2B-AS1	0	0	0	0	0	0	0	0	0	0	1
ACVRL1	0	0	1	0	0	0	0	0	0	0	0
ADAM12	0	0	1	0	0	0	0	0	0	0	0
ADAM19	0	0	0	0	0	0	1	0	0	0	0
ADAM22	0	0	1	0	0	0	0	0	0	0	0
ADAM33	0	0	1	0	0	0	0	0	0	0	0
ADAM8	0	1	0	1	0	1	0	0	0	0	1
ADAMTS1	0	0	1	0	0	0	0	0	0	0	0
ADAMTS12	0	0	1	1	0	0	1	0	0	0	0
ADAMTS14	0	0	1	0	0	0	0	0	0	0	0
ADAMTS17	0	1	1	0	0	1	1	1	1	1	1
ADAMTS3	0	0	0	0	0	0	0	0	1	0	0
ADAMTS4	0	0	1	0	0	0	0	0	0	0	0
ADAMTS5	0	0	1	0	0	0	0	0	0	0	0
ADAMTS6	0	0	1	0	0	0	0	0	0	0	0
ADAMTS7	0	0	1	0	0	0	0	0	0	0	0
ADAMTS9	0	0	1	0	0	0	0	0	0	0	0
ADAMTSL1	0	0	1	0	0	0	0	0	0	0	0
ADAMTSL2	0	0	1	0	0	0	0	0	0	0	0
ADAMTSL3	0	0	0	0	0	0	0	1	0	1	0
ADAMTSL4	0	0	0	0	0	0	1	0	0	0	0
ADAMTSL4-AS1	0	0	0	0	0	0	0	0	0	0	1
ADAP1	0	0	0	0	0	1	0	0	0	0	0
ADAT3	0	0	1	1	0	1	1	1	1	1	1
ADCK5	0	0	0	0	0	1	0	0	0	0	0
ADCY10P1	0	0	0	0	0	0	0	0	0	0	1
ADCY4	0	0	1	0	0	0	0	0	0	0	0
ADCY5	0	0	1	0	0	0	0	0	0	0	0
ADD2	0	0	0	0	0	0	0	0	1	0	0
ADD3	0	0	1	0	0	0	0	0	0	0	0
ADGRA2	0	0	0	1	0	1	0	0	0	0	0
ADGRA3	0	1	0	0	0	0	0	0	0	0	1
ADGRB2	0	0	1	1	1	0	0	0	0	1	1
ADGRD1	0	0	1	0	0	0	0	0	0	0	0
ADGRF5	0	0	1	0	0	0	0	0	0	0	0
ADGRG2	0	0	0	0	0	0	0	0	1	0	0
ADGRL1-AS1	0	0	0	0	0	0	0	0	0	0	1
ADGRL2	0	1	1	0	0	0	1	1	0	1	1
ADGRL4	0	0	1	0	0	0	0	0	0	0	0
ADHFE1	0	0	0	0	0	0	0	0	0	0	1
ADIRF-AS1	0	0	0	0	0	0	0	0	0	0	1
ADM	0	0	0	0	0	0	0	0	1	0	0
ADM2	0	1	0	0	0	0	0	0	0	0	0
ADM5	0	0	0	0	0	1	0	0	0	0	0
ADORA2B	0	0	0	0	0	0	0	0	1	0	0
ADPRH	0	1	1	1	0	0	1	1	1	1	1
ADRA2A	0	0	1	0	0	0	0	0	0	0	0
AFAP1L1	0	0	1	0	0	0	0	0	0	0	0
AFAP1L2	0	0	1	0	0	0	0	0	0	0	0
AGMAT	0	0	0	0	0	0	1	0	0	0	0
AGPAT4	0	0	0	0	0	0	0	0	1	0	0
AGT	0	1	0	0	0	0	0	0	0	0	0
AHRR	0	0	1	1	0	1	1	0	0	0	0
AIF1L	0	0	1	0	0	0	1	1	1	0	1
AIFM2	0	0	0	0	0	1	0	0	0	0	0
AIFM3	0	0	0	0	0	1	0	0	0	0	0
AIM2	0	0	0	0	0	0	1	0	0	0	0
AJM1	0	0	0	0	0	1	0	0	0	0	0
AK4	1	0	0	0	0	0	0	1	0	1	0
AK8	0	0	0	0	1	0	0	0	0	0	0
AKAP12	0	0	1	0	0	0	0	0	0	0	0
AKAP3	0	0	0	0	0	0	0	0	1	0	0
AKAP5	0	0	0	0	1	0	0	0	0	0	0
AKAP6	0	0	1	0	0	0	0	0	0	0	0
AKAP7	0	0	0	0	0	0	1	0	0	0	0
AKR1C3	0	0	1	0	0	0	0	0	0	0	0
AKR7A3	0	0	0	0	1	0	0	0	0	0	0
AKR7L	0	0	1	1	1	1	0	1	0	1	1
AKT3	0	0	1	0	0	0	0	0	0	0	0
ALDH1A1	0	0	1	0	0	0	0	0	0	0	0
ALDH1A3	0	0	0	0	0	0	0	0	1	0	0
ALDH2	0	0	0	0	0	0	1	0	0	0	0
ALDOC	0	0	0	0	0	0	0	0	0	1	0
ALG1	0	0	0	0	0	1	0	0	0	0	0
ALG9	0	0	0	0	0	0	0	0	0	0	1
ALKBH6	0	0	0	0	0	0	0	0	0	0	1
ALOX15B	1	0	0	0	0	0	0	0	0	0	0
ALPK3	1	1	1	1	0	0	1	1	0	1	1
ALPL	0	0	0	0	0	0	0	0	1	0	0
ALS2CL	0	0	0	0	0	0	0	0	0	0	1
AMACR	1	0	1	1	1	0	0	1	0	1	1
AMDHD2	0	0	0	0	0	1	0	0	0	0	0
AMIGO1	0	0	0	0	1	0	0	0	0	0	0
AMIGO2	0	0	0	0	1	0	0	0	0	0	0
AMMECR1	0	0	0	0	0	0	0	1	0	0	0
AMOTL1	0	0	1	0	0	0	0	0	0	0	0
AMOTL2	0	0	1	0	0	0	0	0	0	0	0
AMT	0	0	1	1	0	0	1	0	0	1	1
AMY2B	0	0	0	0	0	0	0	0	0	0	1
ANAPC11	0	0	0	0	0	1	0	0	0	0	0
ANGPT1	0	1	1	1	0	0	1	0	1	1	1
ANGPTL2	0	0	1	0	0	0	0	0	0	0	0
ANGPTL4	0	0	0	0	0	0	0	0	1	0	0
ANGPTL6	0	0	0	0	0	0	1	0	0	0	0
ANK2	0	0	1	0	0	0	0	0	0	0	0
ANKAR	0	0	0	0	0	0	0	0	0	0	1
ANKDD1A	0	0	0	0	0	0	0	0	0	0	1
ANKRD13D	0	0	0	0	0	1	0	0	0	0	0
ANKRD29	0	0	1	0	0	0	0	0	0	0	0
ANKRD33B	0	0	0	0	0	0	1	0	0	0	0
ANKRD36C	0	0	0	0	0	0	0	0	0	0	1
ANKRD6	0	0	0	0	0	0	0	0	1	0	0
ANLN	0	0	0	0	0	0	0	1	0	0	0
ANO2	0	0	0	0	1	0	0	0	0	0	0
ANO6	0	0	1	0	0	0	0	0	0	0	0
ANO7	0	0	1	0	1	1	0	1	1	1	0
ANO7L1	0	0	0	0	0	1	0	0	0	0	0
ANO9	0	0	0	0	0	1	0	0	0	0	0
ANPEP	0	0	1	0	0	0	0	0	0	0	0
ANTKMT	0	0	0	1	1	1	1	1	0	1	1
ANTXR2	0	0	1	0	0	0	0	0	0	0	0
ANXA1	0	0	0	0	0	0	1	0	0	0	0
ANXA3	0	0	1	1	0	0	1	0	1	0	0
ANXA9	0	0	0	0	1	0	0	0	0	0	0
AOC2	0	0	0	0	0	0	0	0	0	0	1
AOC3	0	0	1	0	0	0	0	0	0	0	0
AOX1	0	0	1	0	0	0	0	0	0	0	0
AP1S3	0	0	0	0	0	0	0	1	0	0	0
APBA1	0	1	1	0	0	0	0	0	0	0	0
APBA2	0	0	0	0	0	0	0	0	1	0	0
APBB1IP	0	1	0	0	0	0	1	1	0	0	1
APCDD1	0	0	0	0	0	0	0	0	1	0	0
APLF	0	0	0	0	0	0	0	0	1	0	0
APLP1	1	0	0	1	0	0	0	0	1	1	1
APOBR	0	0	0	0	0	1	0	0	0	0	0
APOD	0	0	1	0	0	0	0	0	0	0	0
APOLD1	0	0	1	0	0	0	0	0	0	0	0
APOO	0	0	0	0	0	0	0	1	0	0	0
AQP1	0	0	1	0	0	0	0	0	0	0	0
ARAP3	0	0	1	0	0	0	0	0	0	0	0
ARFGAP1	0	0	0	0	0	1	0	0	0	0	0
ARHGAP10	0	0	0	0	0	0	1	0	0	0	0
ARHGAP11A	0	0	0	0	0	0	0	1	0	0	0
ARHGAP19	0	0	0	1	0	0	0	0	0	0	0
ARHGAP20	0	0	1	0	0	0	0	0	0	0	0
ARHGAP22	0	1	1	1	0	1	1	1	1	0	1
ARHGAP23	0	0	1	0	0	0	0	0	0	0	0
ARHGAP24	0	0	1	0	0	0	0	0	0	0	0
ARHGAP26	0	0	0	0	0	0	1	0	0	0	0
ARHGAP28	0	0	1	0	0	0	0	0	0	0	0
ARHGAP31	0	0	1	0	0	0	0	0	0	0	0
ARHGAP33	0	0	0	0	0	1	0	0	0	0	0
ARHGAP39	0	0	0	0	0	1	0	0	0	0	0
ARHGAP42	0	0	1	0	0	0	0	0	0	0	0
ARHGAP5-AS1	0	0	0	0	0	0	0	0	1	0	0
ARHGAP6	0	0	1	0	0	0	0	0	0	0	0
ARHGEF10	0	0	1	1	0	0	1	0	1	0	0
ARHGEF15	0	0	1	1	0	0	1	0	0	1	1
ARHGEF16	0	0	0	0	0	1	0	0	0	0	0
ARHGEF19	0	0	0	0	0	1	0	0	0	0	0
ARHGEF28	0	0	0	0	0	0	0	0	0	0	1
ARHGEF37	0	0	0	0	0	0	0	0	0	0	1
ARHGEF39	0	0	0	0	0	0	0	1	0	0	0
ARHGEF4	0	0	0	0	0	0	0	0	1	0	0
ARHGEF40	0	0	1	0	0	0	0	0	0	0	0
ARHGEF6	0	0	1	0	0	0	0	0	0	0	0
ARID3A	0	0	0	0	0	1	0	0	0	0	0
ARID5A	0	0	0	0	0	0	1	0	0	0	0
ARID5B	0	0	0	1	0	0	0	0	0	0	0
ARL10	0	0	0	0	0	0	0	0	1	0	0
ARL11	0	0	0	0	0	0	1	0	0	0	0
ARL4A	0	0	1	0	0	0	0	0	0	0	0
ARMC9	0	0	0	0	1	1	0	0	0	0	0
ARMCX4	0	0	0	1	1	0	0	1	0	0	1
ARMH1	0	0	1	1	0	1	1	0	1	0	1
ARNT2	0	0	0	0	1	0	0	0	0	0	0
ARPC3P3	0	0	0	1	0	1	0	0	0	0	1
ARRB1	0	0	0	0	1	0	0	0	0	0	0
ARRDC1	0	0	0	0	0	1	0	0	0	0	0
ARRDC3	0	0	1	0	0	0	0	0	0	0	0
ARRDC4	0	0	1	0	0	0	0	0	0	0	0
ARSJ	0	0	1	0	0	0	0	0	0	0	0
ARTN	0	0	0	0	0	1	0	0	0	0	0
ASB1	0	0	0	0	0	0	0	0	0	0	1
ASB16	0	0	0	0	1	0	0	0	0	0	0
ASB2	0	0	0	0	0	0	1	0	0	0	0
ASF1B	0	0	0	0	0	0	0	1	0	0	0
ASIC3	0	0	0	0	0	1	0	0	0	0	0
ASPHD1	0	0	0	0	0	0	0	0	0	1	0
ASPHD2	0	0	0	0	0	0	1	0	0	0	0
ASPN	0	0	1	0	0	0	0	0	0	0	0
ASPRV1	0	0	0	0	0	0	0	0	0	0	1
ASPSCR1	0	0	0	0	0	1	0	0	0	0	0
ATAD2	0	1	0	1	0	0	0	1	0	0	1
ATAD3A	0	0	0	0	0	1	0	0	0	0	0
ATAD5	0	0	0	0	0	0	0	1	0	0	0
ATF3	0	0	1	0	0	0	0	0	0	0	0
ATF7-NPFF	0	0	0	0	0	0	0	0	0	0	1
ATG4D	0	0	0	0	0	1	0	0	0	0	0
ATG9B	0	0	0	0	0	0	0	0	0	1	0
ATL1	0	0	0	0	0	0	0	0	0	1	0
ATOH8	0	0	1	0	0	0	0	0	0	0	0
ATP2A3	0	0	0	0	1	0	0	0	0	0	0
ATP2B1-AS1	0	0	0	0	0	0	0	0	0	0	1
ATP2C2	0	0	0	0	1	0	0	0	0	0	0
ATP6V0B	0	0	0	0	0	1	0	0	0	0	0
ATP7B	0	0	0	0	1	0	0	0	0	0	0
ATP8A1	0	0	0	0	0	0	1	0	0	0	0
ATP8B3	0	0	0	0	1	0	0	0	0	0	0
ATP8B4	0	0	0	0	0	0	1	0	0	0	0
AUNIP	0	0	0	0	0	0	0	1	0	0	0
AURKA	0	0	0	0	0	0	0	1	1	1	0
AURKB	0	1	0	0	0	0	0	1	0	1	0
AVPI1	0	0	0	0	0	1	0	0	0	0	0
AVPR1A	0	0	0	1	0	0	0	0	0	0	0
AXIN1	0	0	0	0	0	1	0	0	0	0	0
AXIN2	0	0	0	0	1	0	0	0	0	0	0
AZIN2	0	0	0	0	0	0	0	0	0	0	1
B3GNT4	0	0	0	0	0	0	0	0	1	0	0
B3GNT5	0	0	0	0	0	0	0	0	1	0	0
B4GALNT3	0	0	0	0	0	1	0	0	0	0	0
B4GALT3	0	0	0	0	0	0	1	0	1	0	1
B4GALT6	0	0	0	0	0	0	0	0	0	1	0
BAALC	0	0	0	0	0	0	0	0	0	1	0
BACH2	0	0	0	0	0	0	1	0	0	0	0
BAIAP2	0	0	0	0	0	1	0	0	0	0	0
BAIAP2L1	0	1	0	0	0	0	0	0	0	0	0
BAIAP2L2	0	0	0	0	0	0	0	0	1	0	0
BAK1	0	0	0	0	0	0	0	1	0	0	0
BARD1	0	0	0	0	0	0	0	1	0	0	0
BASP1	0	0	1	0	0	0	0	0	0	0	0
BATF	0	0	0	0	0	1	0	0	0	0	0
BAX	0	0	0	1	0	0	0	0	0	0	0
BAZ2B	0	0	0	0	1	0	0	0	0	0	0
BBC3	0	0	0	0	0	1	0	0	0	0	0
BCAS1	0	0	0	0	1	0	0	0	0	0	0
BCAS4	0	0	0	0	1	0	0	0	0	0	0
BCL2A1	0	0	0	0	0	0	1	0	0	0	0
BCL2L12	0	0	0	0	0	1	0	0	0	0	0
BCL6	0	0	0	0	0	0	0	0	0	0	1
BCL9	0	0	0	0	1	0	0	0	0	0	0
BCO2	0	0	0	0	0	0	0	0	0	0	1
BDNF-AS	0	0	0	0	1	0	0	0	0	0	0
BEGAIN	0	0	0	0	0	0	0	0	0	1	0
BEND3	0	1	0	1	0	0	1	1	1	0	1
BEND5	0	0	0	0	0	0	0	0	0	0	1
BEND6	0	0	0	0	0	0	0	0	1	0	0
BEND7	0	1	1	1	0	0	1	1	1	1	0
BEST1	0	0	0	0	0	0	0	0	0	0	1
BGN	0	0	1	0	0	0	0	0	0	0	0
BHLHE41	0	0	1	0	0	0	0	0	0	0	0
BHMT2	0	0	1	1	0	1	1	1	1	0	1
BICC1	0	0	1	0	0	0	0	0	0	0	0
BICDL1	0	0	0	0	1	0	0	0	0	0	0
BIN1	0	0	0	0	0	0	1	0	0	0	0
BIRC5	0	0	0	0	0	0	0	1	0	0	0
BLM	0	0	0	0	0	0	0	1	0	0	0
BLNK	0	0	0	0	0	0	1	0	0	0	0
BMF	0	0	0	0	0	0	1	0	0	0	0
BMP4	0	0	1	0	0	0	0	0	0	0	0
BMP8A	0	0	1	0	0	0	0	0	0	0	0
BMP8B	0	0	0	0	0	0	0	1	0	0	0
BMS1P1	0	0	0	0	0	0	0	0	0	0	1
BNIP3P11	0	0	0	0	0	0	0	0	0	0	1
BOC	0	0	0	0	0	0	0	0	1	0	0
BOLA2-SMG1P6	0	0	0	0	0	0	0	1	0	0	0
BOLA3-DT	0	0	0	0	0	0	0	0	0	1	0
BOP1	0	0	0	0	0	0	0	1	0	0	0
BORA	0	0	0	0	0	0	0	1	0	0	0
BRCA1	0	0	0	0	0	0	0	1	0	0	0
BRCA2	0	0	0	0	0	0	0	1	0	0	0
BRI3BP	0	0	0	0	0	0	0	1	0	0	0
BRICD5	0	0	0	0	0	1	0	0	0	0	0
BRIP1	0	0	0	0	0	0	0	1	0	0	0
BRSK1	0	0	0	0	0	1	0	0	0	0	0
BRWD1-AS2	0	0	0	0	0	0	0	0	0	0	1
BST1	0	0	1	0	0	0	0	0	0	0	0
BTBD11	0	0	1	0	0	0	0	0	0	0	0
BTN2A3P	0	0	0	0	0	0	1	0	0	0	0
BTNL9	0	0	1	0	0	0	0	0	0	0	0
BUB1	0	1	0	1	0	0	1	0	1	1	0
BUB1B	0	1	0	1	0	0	1	1	0	1	0
BVES	0	0	0	0	0	0	0	0	1	0	0
C10orf95	0	0	0	1	1	0	0	1	0	1	1
C11orf96	0	0	1	0	0	0	0	0	0	0	0
C11orf98	0	0	0	1	0	0	1	0	0	0	0
C12orf60	0	0	0	0	1	0	0	0	0	0	0
C14orf132	0	0	0	0	1	0	0	0	0	0	0
C14orf28	0	0	1	0	0	0	0	0	0	0	0
C15orf48	0	0	0	0	1	0	0	0	0	0	0
C16orf86	0	0	0	0	0	1	0	0	0	0	0
C19orf12	0	0	0	0	0	0	1	0	0	0	0
C19orf38	0	0	0	0	0	0	1	0	0	0	0
C19orf48	0	0	0	0	0	1	0	0	0	0	0
C1orf112	0	0	0	1	0	0	0	0	1	0	1
C1orf115	0	0	1	0	0	0	0	0	0	0	0
C1orf131	0	0	0	0	0	0	0	1	0	0	0
C1orf159	0	0	0	1	0	1	1	1	1	1	1
C1orf35	0	0	0	0	0	1	0	0	0	0	0
C1orf53	0	0	0	0	0	1	0	0	0	0	0
C1orf56	0	0	0	0	1	0	0	0	0	0	0
C1orf74	0	0	0	0	0	0	0	1	0	0	0
C1QTNF1	0	1	1	1	0	1	0	1	1	0	1
C1QTNF6	0	0	1	0	0	0	0	0	0	0	0
C20orf204	0	0	0	0	0	1	0	0	0	0	0
C21orf58	0	0	0	0	0	0	0	1	0	0	0
C21orf62-AS1	0	0	0	0	0	0	0	0	0	0	1
C22orf23	0	0	0	0	0	0	0	0	1	0	0
C2CD2	0	0	0	0	0	0	1	0	0	0	0
C2CD2L	0	0	0	0	0	1	0	0	0	0	0
C2CD4D	0	0	0	0	0	1	0	1	1	1	0
C2orf15	0	0	0	1	1	1	0	1	0	1	1
C2orf74	1	0	0	1	0	1	1	0	1	0	0
C3orf52	0	0	0	0	1	0	0	0	0	0	0
C3orf80	0	0	1	0	0	0	0	0	0	0	0
C4A	0	0	0	0	1	0	0	0	0	0	0
C4B	0	0	0	0	1	0	0	0	0	0	0
C4orf36	0	0	0	0	1	0	0	0	0	0	0
C5	0	0	0	0	1	0	0	0	0	0	0
C5AR2	0	0	0	1	1	0	0	0	0	1	1
C5orf34	0	0	0	0	0	0	0	1	0	0	0
C8orf76	0	0	0	0	0	0	0	1	0	0	0
C9orf116	0	0	0	0	1	0	0	0	0	0	0
C9orf43	0	0	0	1	0	1	0	1	0	0	1
C9orf72	0	0	0	0	0	0	0	0	0	0	1
CA11	0	0	0	0	0	1	0	0	0	0	0
CA13	0	0	0	0	0	0	0	0	1	0	0
CA14	0	0	0	0	1	0	0	0	0	0	0
CA5B	0	0	1	1	1	0	1	1	0	0	1
CAB39L	0	0	0	0	1	0	0	0	0	0	0
CABLES2	0	0	0	0	0	0	0	1	0	0	0
CABYR	0	0	0	0	1	0	0	0	0	0	0
CACFD1	0	0	0	0	0	1	0	0	0	0	0
CACHD1	0	0	1	0	0	0	0	0	0	0	0
CACNA1C	0	0	1	1	1	0	1	0	0	1	1
CACNA1D	0	0	0	0	1	0	0	0	0	0	0
CACNA1H	0	0	0	0	1	0	0	0	0	0	0
CACNA2D2	0	0	0	0	1	0	0	0	0	0	0
CACNB3	0	0	0	0	0	1	0	0	0	0	0
CACNB4	0	0	1	0	1	0	1	1	0	0	1
CALB2	0	0	0	0	0	0	0	0	1	0	0
CALCOCO1	0	0	0	0	1	0	0	0	0	0	0
CAMK1	0	0	0	0	0	1	0	0	0	0	0
CAMK4	0	0	0	0	0	0	1	0	0	0	0
CAMSAP3	0	0	0	0	0	1	0	0	0	0	0
CAND2	0	0	0	0	0	0	0	0	1	0	0
CAPN10-DT	0	0	0	0	0	0	0	0	0	0	1
CAPN11	0	0	1	0	0	0	0	0	0	0	0
CAPN15	0	0	0	0	0	1	0	0	0	0	0
CAPN5	0	0	1	0	0	0	0	0	0	0	0
CAPS	0	0	0	0	0	1	0	0	0	0	0
CAPS2	0	0	0	0	0	0	0	0	0	0	1
CARD11	0	0	0	0	0	0	1	0	0	0	0
CARD14	0	0	0	0	0	1	0	0	0	0	0
CARD19	0	0	1	1	1	1	0	0	0	1	1
CARD6	0	0	1	0	0	0	0	0	0	0	0
CARF	0	0	0	0	0	0	0	0	0	0	1
CARMIL2	0	0	0	0	0	0	1	0	0	0	0
CARMIL3	0	0	0	1	1	1	1	1	0	1	1
CARMN	0	0	0	0	0	0	0	0	0	0	1
CASP10	0	0	0	0	0	0	1	0	0	0	0
CASP4LP	0	0	1	0	0	0	0	0	1	0	0
CAT	0	0	1	0	0	0	0	0	0	0	0
CATSPER3	0	0	0	0	0	1	0	0	0	0	0
CAV1	0	0	1	0	0	0	0	0	0	0	0
CAV2	0	0	1	0	0	0	0	0	0	0	0
CAVIN1	0	0	1	0	0	0	0	0	0	0	0
CAVIN4	0	0	0	0	0	0	0	1	0	0	0
CBR3-AS1	0	0	0	0	0	0	0	0	0	0	1
CBWD5	0	0	0	0	0	0	0	0	0	0	1
CBX2	0	0	0	0	0	0	0	1	0	0	0
CBX3P2	0	0	0	0	0	0	0	0	1	0	0
CBX4	0	0	0	0	0	0	0	0	0	1	1
CBX7	0	0	1	0	0	0	0	0	0	0	0
CBX8	0	0	0	0	0	1	0	0	0	0	0
CC2D2A	0	0	0	0	0	0	0	0	0	0	1
CCBE1	0	0	1	0	0	0	0	0	0	0	0
CCDC136	0	0	0	0	0	0	0	0	0	0	1
CCDC137	0	0	0	0	0	1	0	0	0	0	0
CCDC150	0	0	0	0	0	0	0	1	0	0	0
CCDC152	0	0	0	0	0	0	0	0	0	0	1
CCDC153	0	0	0	0	0	1	0	0	0	0	0
CCDC157	0	0	0	0	0	1	0	0	0	0	0
CCDC167	0	0	0	0	0	0	0	1	0	0	0
CCDC18-AS1	0	0	0	0	0	0	0	0	0	0	1
CCDC183	0	0	0	0	0	1	0	0	0	0	0
CCDC183-AS1	0	0	0	0	1	0	0	0	0	0	0
CCDC184	0	0	1	0	0	0	0	0	0	0	0
CCDC24	0	0	0	0	0	1	0	0	0	0	0
CCDC28B	0	0	0	0	0	0	0	0	0	0	1
CCDC3	0	0	1	0	0	0	0	0	0	0	0
CCDC40	0	0	0	0	1	0	0	0	0	0	0
CCDC50	0	0	1	0	0	0	0	0	0	0	0
CCDC69	0	0	0	0	0	0	1	0	0	0	0
CCDC74A	0	0	0	0	1	0	0	0	0	0	0
CCDC74B	0	0	0	0	1	0	0	0	0	0	0
CCDC8	0	0	0	0	0	0	1	0	0	0	0
CCDC80	0	0	1	0	0	0	0	0	0	0	0
CCDC82	0	0	0	0	0	0	0	0	1	0	0
CCDC87	0	0	0	0	1	0	0	0	0	0	0
CCDC9B	0	0	0	0	0	0	0	0	1	0	0
CCL28	0	0	1	0	0	0	0	0	0	0	0
CCL8	0	1	0	1	0	0	1	0	0	0	0
CCM2L	1	0	0	1	1	0	1	0	0	0	1
CCN1	0	0	1	0	0	0	0	0	0	0	0
CCN3	0	0	1	0	0	0	0	0	0	0	0
CCN4	0	0	1	0	0	0	0	0	0	0	0
CCN5	0	0	1	0	0	0	0	0	0	0	0
CCNA2	0	0	0	0	0	0	0	1	0	0	0
CCNB1	0	0	0	0	0	0	0	1	0	0	0
CCNB2	0	1	0	0	0	0	1	1	0	1	0
CCNB3	0	0	0	0	0	0	0	1	0	0	0
CCND2	0	0	0	0	0	0	1	0	0	0	0
CCNE1	0	0	0	0	0	0	0	1	0	0	0
CCNE2	0	0	0	0	0	0	0	1	0	0	0
CCNF	0	0	0	0	0	0	0	1	0	0	0
CCR5	0	0	0	0	0	0	1	0	0	0	0
CCSER1	0	0	0	1	0	0	0	0	0	0	0
CD101	0	0	0	0	0	0	1	0	0	0	0
CD101-AS1	0	0	0	0	0	0	0	0	0	0	1
CD163L1	0	0	0	0	0	0	1	0	0	0	0
CD200	0	0	1	0	0	0	0	0	0	0	0
CD200R1	0	0	0	0	0	0	1	0	0	0	0
CD209	0	0	0	0	0	0	1	0	0	0	0
CD22	0	0	0	0	0	0	1	0	0	0	0
CD248	0	0	1	0	0	0	0	0	0	0	0
CD2BP2-DT	0	0	0	0	0	1	0	0	0	0	0
CD300LF	0	0	0	0	0	0	1	0	0	0	0
CD302	0	0	1	0	0	0	0	0	0	0	0
CD34	0	0	1	0	0	0	0	0	0	0	0
CD36	0	0	1	0	0	0	0	0	0	0	0
CD5	0	0	1	0	0	0	1	0	0	0	0
CD6	0	0	0	0	0	0	1	0	0	0	0
CD7	0	0	0	0	0	0	1	0	0	0	0
CD72	0	0	0	0	0	0	1	0	0	0	0
CD86	0	0	0	0	0	0	1	0	0	0	0
CDADC1	0	0	0	0	1	0	0	0	0	0	0
CDC14A	0	0	0	0	1	0	0	0	0	0	0
CDC14B	0	0	1	0	0	0	0	0	0	0	0
CDC20	0	0	0	0	0	0	0	1	0	0	0
CDC25A	0	0	0	0	0	0	0	1	0	0	0
CDC25C	0	0	0	0	0	0	0	1	0	0	0
CDC42EP2	0	0	0	0	0	1	0	0	0	0	0
CDC42EP3	0	0	1	1	0	0	1	0	0	0	1
CDC45	0	0	0	0	0	0	0	1	0	0	0
CDC6	0	0	0	0	0	0	0	1	0	0	0
CDC7	0	1	0	0	0	0	1	0	0	1	1
CDCA2	0	0	0	0	0	0	0	1	0	0	0
CDCA3	0	0	0	0	0	0	0	1	0	0	0
CDCA4	0	0	0	0	0	0	0	1	0	0	0
CDCA5	0	0	0	0	0	0	0	1	0	0	0
CDCA7	0	0	0	0	0	0	0	1	0	0	0
CDCA8	0	0	0	0	0	0	0	1	0	0	0
CDCP1	0	1	0	0	0	0	0	0	0	0	0
CDH11	0	0	1	0	0	0	0	0	0	0	0
CDH13	0	0	1	1	1	0	0	1	0	1	0
CDH2	0	0	0	0	0	0	0	1	0	0	0
CDH23	0	0	1	0	0	0	0	0	0	0	0
CDH24	0	0	0	0	0	0	0	1	0	0	0
CDH5	0	0	1	0	0	0	0	0	0	0	0
CDK1	0	0	0	0	0	0	0	1	0	0	0
CDK13-DT	0	0	0	0	0	0	0	0	0	0	1
CDK5	0	0	0	0	0	1	0	0	0	0	0
CDK5R1	0	0	0	0	0	0	0	0	0	1	0
CDK6	0	0	0	0	0	0	0	0	1	0	0
CDKL1	0	0	0	0	0	0	0	0	0	0	1
CDKN1C	0	0	0	0	0	0	0	0	1	0	0
CDKN2A	0	0	0	0	0	0	0	0	1	0	0
CDKN2C	0	0	0	0	0	0	0	1	0	0	0
CDKN2D	0	0	0	0	0	0	0	1	0	0	0
CDKN3	0	0	0	0	0	0	0	0	1	1	0
CDNF	0	0	0	0	0	0	0	0	0	0	1
CDON	0	0	0	0	1	0	0	0	0	0	0
CDT1	0	0	0	0	0	0	0	1	0	0	0
CEBPA	0	0	0	0	0	0	1	0	0	0	0
CEBPA-DT	0	0	0	0	0	1	0	0	0	0	0
CELF2	0	0	0	0	0	0	1	0	0	0	0
CELSR1	0	0	0	0	1	0	0	0	0	0	0
CELSR3	0	0	0	0	0	0	0	0	0	1	0
CEMIP	0	1	0	1	0	0	1	1	0	0	0
CENPA	0	0	0	0	0	0	0	1	0	0	0
CENPE	0	0	0	0	0	0	1	1	0	1	0
CENPF	0	1	0	1	0	0	1	1	1	1	1
CENPH	0	0	0	0	0	0	0	1	0	0	0
CENPI	0	1	0	0	0	0	0	0	1	1	1
CENPK	0	0	0	0	0	0	0	1	0	0	0
CENPL	0	1	0	1	0	0	1	1	1	0	1
CENPM	0	0	0	0	0	0	0	1	0	0	0
CENPN	0	0	0	0	0	0	0	1	0	0	0
CENPO	0	0	0	0	0	0	0	1	0	0	0
CENPP	0	0	0	0	1	0	0	0	0	0	0
CENPS	0	0	0	0	0	1	0	0	0	0	0
CENPU	0	0	0	0	0	0	0	1	0	0	0
CENPW	0	1	0	1	0	0	1	0	1	0	0
CENPX	0	0	0	0	0	1	0	0	0	0	0
CEP112	0	0	1	0	0	0	0	0	0	0	0
CEP126	0	0	0	0	1	0	0	0	0	0	0
CEP131	0	0	0	1	0	1	0	1	1	1	0
CEP250	0	0	0	0	0	0	0	1	0	0	0
CEP55	0	0	0	0	0	0	0	1	0	0	0
CEP68	0	0	0	0	0	0	1	0	0	1	0
CEP85	0	0	0	0	0	0	0	1	0	0	0
CEP85L	0	0	0	0	0	0	1	0	0	0	0
CERKL	0	0	0	0	0	0	1	0	0	0	0
CEROX1	0	0	0	0	0	0	0	0	1	0	0
CERT1	0	0	0	0	1	0	0	0	0	0	0
CETP	0	0	0	0	0	0	1	0	0	0	0
CFAP157	0	0	0	0	0	1	0	0	0	0	0
CFAP20DC	0	0	0	0	0	0	0	1	0	0	0
CFAP251	0	0	0	0	0	0	0	0	0	1	0
CFAP300	1	0	1	0	1	1	1	1	0	1	1
CFAP45	0	0	0	0	0	1	0	0	0	0	0
CFAP53	0	0	0	0	1	0	0	0	0	0	0
CFAP57	0	0	0	0	1	0	0	0	0	0	0
CFAP69	0	0	0	0	1	0	0	0	0	0	0
CFAP70	0	0	1	0	1	0	0	0	0	1	0
CFAP92	0	0	0	0	1	0	0	0	0	0	0
CFB	0	0	0	0	0	1	0	0	0	0	0
CFD	0	0	0	0	0	1	0	0	0	0	0
CFH	0	0	1	0	0	0	0	0	0	0	0
CFI	0	0	1	0	0	0	0	0	0	0	0
CFL2	0	0	1	0	0	0	0	0	0	0	0
CFLAR	0	0	0	0	0	0	1	0	0	0	0
CGAS	0	0	0	0	0	0	0	1	0	0	0
CHAC1	0	0	0	0	0	0	0	1	0	0	0
CHAC2	0	0	0	0	0	0	0	1	0	0	0
CHAF1A	0	0	0	0	0	0	1	0	0	1	1
CHAF1B	0	0	0	0	0	0	0	0	1	0	0
CHD9	0	0	0	0	1	0	0	0	0	0	0
CHEK1	0	0	0	0	0	0	0	1	0	0	0
CHEK2	0	0	0	0	0	0	0	1	0	0	0
CHKB-DT	0	0	0	0	0	1	0	0	0	0	0
CHPF	0	0	0	0	0	1	0	0	0	0	0
CHRD	0	0	0	0	1	0	0	0	0	0	0
CHST1	0	0	0	0	1	0	0	0	0	0	0
CHST11	0	0	0	0	0	0	1	0	0	0	0
CHST2	0	0	0	0	0	0	1	0	0	0	0
CHST3	0	0	0	0	0	0	0	0	1	0	0
CHST6	0	0	0	0	0	0	0	0	1	0	0
CHST7	0	0	1	0	0	0	0	0	0	0	0
CHTF18	0	0	0	1	0	1	1	1	1	0	0
CIAO3	0	0	0	0	0	1	0	0	0	0	0
CIART	0	0	0	1	0	0	0	0	1	0	1
CIB2	0	0	0	0	0	0	0	0	1	0	0
CICP14	0	0	0	0	0	0	0	0	0	0	1
CILP2	0	0	1	0	0	0	0	0	0	0	0
CIP2A	0	0	0	0	0	0	0	1	0	0	0
CIRBP-AS1	0	0	0	0	0	0	0	0	0	0	1
CISH	0	0	0	0	0	1	0	0	0	0	0
CIT	0	1	0	0	0	0	0	1	0	0	1
CKAP2	0	0	0	0	0	0	0	1	0	0	0
CKAP2L	0	0	0	0	0	0	0	1	0	0	0
CKMT2	0	0	0	0	1	0	0	0	0	1	1
CKMT2-AS1	0	0	0	0	0	0	0	0	0	0	1
CKS2	0	1	0	1	0	1	1	1	0	0	0
CLBA1	0	0	0	0	0	1	0	0	0	0	0
CLCN2	0	0	0	0	0	0	0	1	0	0	0
CLCN4	0	0	1	0	0	0	0	1	0	0	0
CLCN6	0	0	1	0	0	0	0	0	0	0	0
CLDN11	0	0	1	0	0	0	0	0	0	0	0
CLDN7	0	0	0	0	0	1	0	0	0	0	0
CLEC11A	0	0	0	0	0	1	0	0	0	0	0
CLEC14A	0	0	1	0	0	0	0	0	0	0	0
CLEC1A	0	0	1	0	0	0	0	0	0	0	0
CLEC3B	1	0	1	1	1	1	1	0	0	1	1
CLEC7A	0	0	0	0	0	0	1	0	0	0	0
CLIC2	0	0	0	0	0	0	1	0	0	0	0
CLIC5	0	0	1	0	0	0	0	0	0	0	0
CLIP3	0	0	1	0	0	0	0	0	0	0	0
CLIP4	0	0	0	0	0	0	0	0	1	0	0
CLK4	0	0	0	0	0	0	0	0	0	0	1
CLMP	0	0	1	0	0	0	0	0	0	0	0
CLN3	0	0	0	0	0	1	0	0	0	0	0
CLSPN	0	0	0	0	0	0	0	1	0	0	0
CLTCL1	0	1	1	0	0	0	1	1	1	0	0
CLYBL	0	0	0	0	0	0	0	0	1	0	0
CMC2	0	0	0	0	0	0	0	1	0	0	0
CMPK2	0	0	0	0	0	0	1	0	0	0	0
CMTM7	0	0	0	0	0	0	0	0	1	0	0
CMYA5	0	0	0	0	1	0	0	0	0	0	0
CNFN	0	0	0	0	0	1	0	0	0	0	0
CNIH2	0	0	0	0	0	0	0	1	0	0	0
CNKSR1	0	0	0	0	0	1	0	0	0	0	0
CNN1	0	0	1	0	0	0	0	0	0	0	0
CNN3-DT	0	1	0	0	0	0	0	0	0	0	0
CNRIP1	0	0	1	0	0	0	0	0	0	0	0
CNTN4	0	0	1	0	0	0	0	0	0	0	0
COA6	0	0	0	0	0	1	0	0	0	0	0
COBLL1	0	0	1	0	0	0	0	0	0	0	0
COL11A1	0	1	0	0	0	0	0	0	0	0	0
COL13A1	0	0	1	0	0	0	0	0	0	0	0
COL14A1	0	0	1	0	0	0	0	0	0	0	0
COL1A1	0	0	1	0	0	0	0	0	0	0	0
COL21A1	0	0	0	0	0	0	0	1	0	0	1
COL22A1	0	0	0	0	0	0	0	0	1	0	0
COL24A1	0	0	0	0	0	0	0	0	0	0	1
COL4A4	0	0	0	0	0	0	1	0	0	0	0
COL5A1	0	0	1	0	0	0	0	0	0	0	0
COL5A2	0	0	0	1	0	0	1	1	0	0	0
COL8A1	0	0	0	0	0	0	0	1	0	0	1
COLEC12	0	0	1	0	0	0	0	0	0	0	0
COLGALT2	0	0	0	0	0	0	0	0	1	0	0
COMMD5	0	0	0	0	0	1	0	0	0	0	0
COMTD1	0	0	0	0	0	1	0	0	0	0	0
COPB2-DT	0	0	0	1	0	0	0	0	0	0	1
CORIN	0	0	1	0	0	0	0	0	0	0	0
CORO2A	0	0	0	1	1	0	0	1	0	0	0
CORO7	0	0	0	0	0	1	0	0	0	0	0
COX20	0	1	0	1	0	0	0	0	1	0	0
COX6C	0	0	0	0	0	1	0	1	0	1	0
COX7A1	0	0	1	0	0	0	0	0	0	0	0
CP	0	1	0	0	0	0	0	0	0	0	0
CPAMD8	0	0	0	0	0	0	0	0	1	0	0
CPEB1	0	0	0	0	0	0	0	0	1	0	0
CPED1	0	0	1	0	0	0	0	0	0	0	0
CPM	0	0	0	0	0	0	1	0	0	0	0
CPNE2	0	0	0	0	0	0	0	0	1	0	0
CPNE8	0	0	0	1	0	0	0	1	1	0	0
CPS1	1	0	1	0	0	0	0	0	0	1	1
CPXM2	0	0	1	0	0	0	0	0	0	0	0
CREB3L1	0	0	0	0	1	0	0	0	0	0	0
CREB3L4	0	0	0	0	1	0	0	0	0	0	0
CREB5	0	1	1	1	0	0	1	1	1	0	1
CREBRF	0	0	1	1	1	0	1	0	0	1	1
CRELD2	0	1	0	1	0	1	1	1	1	1	1
CRIM1	0	0	0	1	0	0	0	0	0	0	0
CRISPLD1	0	0	0	0	0	0	0	0	1	0	0
CRY2	0	0	0	0	1	0	0	0	0	0	0
CRYAB	0	0	0	0	0	0	0	0	1	0	0
CRYBG3	0	0	1	0	0	0	0	0	0	0	0
CRYZL2P	0	1	1	0	0	0	1	0	1	0	0
CSF3R	0	0	0	0	0	1	0	0	0	0	0
CSGALNACT1	0	0	1	0	0	0	0	0	0	0	0
CSGALNACT2-DT	0	0	0	0	0	0	0	0	0	0	1
CSMD2	0	0	0	0	0	0	0	0	1	0	0
CSRNP1	0	0	1	0	0	0	0	0	0	0	0
CSRP2	0	0	0	0	0	0	0	0	1	0	0
CTF1	0	0	0	0	0	1	0	0	0	0	0
CTHRC1	0	0	1	0	0	0	1	1	0	0	0
CTIF	0	0	1	1	0	1	1	1	1	1	1
CTNNAL1	0	0	1	0	0	0	0	0	0	0	0
CTPS1	0	0	0	0	0	0	0	1	0	0	0
CTTN-DT	0	0	0	0	0	0	0	0	0	0	1
CTXN1	0	0	0	1	0	1	1	1	0	1	1
CUBN	0	0	1	0	0	0	0	0	0	0	0
CX3CL1	0	0	0	1	0	0	0	0	1	0	1
CXCL10	0	0	0	0	0	0	1	0	0	0	0
CXCL11	0	0	0	0	0	0	1	0	0	0	0
CXCL12	0	0	1	0	0	0	0	0	0	0	0
CXCL9	0	0	0	0	0	0	1	0	0	0	0
CYFIP2	0	0	0	0	1	0	0	0	0	0	0
CYGB	0	0	1	0	0	0	0	0	0	0	0
CYP26B1	0	0	0	0	0	0	0	0	1	0	0
CYP27B1	0	0	0	0	0	0	1	0	0	0	0
CYP2S1	0	0	0	1	1	0	0	1	0	0	1
CYP2U1	0	0	1	0	0	0	0	0	0	0	0
CYP39A1	1	0	1	1	0	0	0	1	1	0	1
CYP46A1	0	0	0	0	0	0	0	0	0	0	1
CYP51A1	0	0	0	0	1	0	0	0	0	0	0
CYP7B1	0	0	0	0	0	0	0	0	1	0	0
CYRIA	0	0	0	0	0	0	1	0	0	0	0
CYSRT1	0	0	0	0	0	1	0	0	0	0	0
CYTOR	0	0	0	0	0	0	1	0	0	0	0
CYYR1	0	0	1	0	0	0	0	0	0	0	0
DAAM2	0	1	0	0	1	0	1	1	0	1	0
DAB2IP	0	1	1	1	0	1	1	1	1	0	1
DAPK2	0	0	0	0	0	0	0	0	0	0	1
DBF4	0	0	0	0	0	0	0	1	0	0	0
DBF4B	0	0	0	0	0	0	0	1	0	0	0
DBNDD1	0	0	0	0	0	0	0	1	0	0	0
DCAF13	0	0	0	0	0	0	0	1	0	0	0
DCBLD2	0	0	0	0	0	0	0	0	1	0	0
DCLK1	0	0	0	0	1	0	0	0	0	0	0
DCN	0	0	1	0	0	0	0	0	0	0	0
DCST1-AS1	0	1	0	0	0	1	0	1	0	0	1
DCUN1D3	0	0	1	0	0	0	0	0	0	0	0
DDIAS	0	0	0	0	0	0	0	1	0	0	0
DDIT4L	0	0	0	0	0	0	0	0	1	0	0
DDR2	0	0	1	0	0	0	0	0	0	0	0
DDX12P	0	0	0	0	0	0	0	1	0	0	0
DDX39A	0	0	0	0	0	0	0	1	0	0	0
DEGS2	0	0	0	0	1	0	0	0	0	0	0
DENND1B	0	0	0	0	1	0	0	0	0	0	0
DENND1C	0	0	0	0	0	0	1	0	0	0	0
DENND2A	0	0	0	0	0	0	0	0	1	0	0
DENND2C	0	0	0	1	0	0	0	1	0	0	0
DENND5B	0	0	0	0	1	0	0	0	0	0	0
DEPDC1	0	0	0	0	0	0	0	1	0	0	0
DEPDC1B	0	0	0	0	0	0	0	1	0	0	0
DEPDC7	0	0	0	0	0	0	0	0	1	0	0
DEPP1	0	0	0	0	0	0	1	0	0	0	0
DERL3	0	0	0	0	0	0	1	0	0	0	0
DGAT2	0	0	0	0	0	0	0	0	1	0	0
DGKI	0	0	1	0	0	0	0	0	0	0	0
DGUOK-AS1	0	0	0	0	0	0	0	0	0	0	1
DHRS13	0	0	0	0	1	0	0	0	0	0	0
DHX34	0	0	0	0	0	1	0	0	0	0	0
DIAPH2	0	0	0	0	0	0	0	1	0	0	0
DIAPH3	0	0	0	0	0	0	0	1	0	0	0
DIPK1A	1	0	1	1	1	0	1	0	0	0	1
DIPK2A	0	0	0	0	0	0	0	0	1	0	0
DIPK2B	0	0	1	0	0	0	0	0	0	0	0
DIRAS3	0	0	1	0	0	0	0	0	0	0	0
DIRC3	0	0	0	0	0	0	0	0	0	0	1
DISC1	0	0	0	0	0	0	1	0	0	0	0
DISP2	0	0	0	0	0	0	0	0	0	1	0
DIXDC1	0	0	1	0	0	0	0	0	0	0	0
DKK3	0	0	1	0	0	0	0	0	0	0	0
DLC1	0	0	1	0	0	0	0	0	0	0	0
DLEU1	0	0	0	0	0	0	0	0	0	0	1
DLEU2	0	0	0	0	0	0	0	1	0	0	0
DLEU7	0	0	0	0	0	0	1	0	0	0	0
DLG2	0	0	0	0	0	0	0	0	0	0	1
DLG3	0	0	0	0	1	0	0	0	0	0	0
DLGAP5	0	0	0	0	0	0	0	1	0	0	0
DLK2	0	0	1	0	0	0	1	1	1	1	0
DLL1	0	0	1	0	0	0	0	0	0	0	0
DLL4	0	0	1	0	0	0	0	0	0	0	0
DMD	0	0	0	0	0	0	0	0	1	0	0
DMGDH	0	0	1	1	0	0	1	1	1	1	1
DMTN	0	0	0	0	0	0	0	0	1	0	0
DNA2	0	0	0	0	0	0	0	1	0	0	0
DNAAF11	0	0	0	0	1	0	0	0	0	0	0
DNAAF4	0	0	0	0	1	0	0	0	0	0	0
DNAAF8	0	0	0	0	0	1	0	0	0	0	0
DNAAF9	0	0	1	0	0	0	0	0	0	0	0
DNAH1	0	0	0	0	0	0	0	0	0	0	1
DNAH10OS	0	0	0	0	1	0	0	0	0	0	0
DNAH14	0	0	0	0	0	0	0	0	0	0	1
DNAJB4	0	0	1	0	0	0	0	0	0	0	0
DNAJC12	0	0	0	0	1	0	0	0	0	0	0
DNAJC18	0	0	0	0	0	0	0	0	0	0	1
DNAJC27	0	0	0	0	1	0	0	0	0	0	0
DNAJC9	0	0	0	0	0	0	0	1	0	0	0
DNHD1	0	0	0	0	0	0	0	0	0	0	1
DNM3	0	0	1	1	0	0	1	1	1	0	0
DNMT1	0	0	0	0	0	0	0	1	0	0	0
DNMT3B	0	0	0	0	0	0	0	1	0	0	0
DOC2B	0	0	1	0	0	0	0	0	0	0	0
DOCK11	0	0	0	0	0	0	1	0	0	0	0
DOCK4	0	0	1	0	0	0	0	0	0	0	0
DOHH	0	0	0	0	0	1	0	0	0	0	0
DOK3	0	0	0	0	0	0	1	0	0	0	0
DOK5	0	0	0	0	0	0	0	0	1	0	0
DONSON	0	0	0	0	0	0	0	1	0	0	0
DOP1A	0	0	1	0	0	0	0	0	0	0	0
DOP1B	0	1	0	1	1	0	1	1	0	0	0
DPF3	0	0	0	0	0	0	0	0	1	0	0
DPP3	0	0	0	0	0	0	0	1	0	0	0
DPP4	0	0	1	0	0	0	0	0	0	0	0
DPYD	0	0	1	0	0	0	0	0	0	0	0
DPYSL2	0	0	1	0	0	0	0	0	0	0	0
DSCC1	0	0	0	0	0	0	0	1	0	0	0
DSE	0	0	1	0	0	0	0	0	0	0	0
DSEL	0	0	1	0	0	0	0	0	0	0	0
DSN1	0	0	0	0	0	0	0	1	0	0	0
DST	0	0	1	0	0	0	0	0	0	0	0
DTL	0	0	0	0	0	0	0	1	0	0	0
DTX1	0	0	0	0	0	0	0	0	1	0	0
DTX2	1	1	1	0	0	0	1	1	1	0	0
DTYMK	0	0	0	0	0	0	0	1	0	0	0
DUSP1	0	0	1	0	0	0	0	0	0	0	0
DUSP19	0	0	0	1	0	0	1	0	0	0	0
DUSP6	0	0	1	0	0	0	0	0	0	0	0
DYNC1I1	0	0	0	0	0	0	0	0	1	0	0
DYNC2H1	0	0	1	1	1	0	0	0	0	1	1
DYNC2I2	0	0	0	0	0	1	0	0	0	0	0
DYNLT2B	0	0	0	0	0	1	0	0	0	0	0
DYRK3	0	0	1	1	0	0	1	0	1	1	1
DZIP1	0	0	0	0	0	0	0	0	1	0	0
DZIP1L	0	0	0	0	0	0	0	0	0	0	1
E2F1	0	0	0	0	0	0	1	0	0	0	1
E2F2	0	0	0	0	0	0	0	1	0	0	0
E2F3	0	0	0	0	0	0	0	1	0	0	0
E2F5	0	0	0	0	0	0	0	1	0	0	0
E2F8	0	0	0	0	0	0	0	1	0	0	0
E4F1	0	0	0	0	0	1	0	0	0	0	0
EBF1	0	0	1	0	0	0	0	0	0	0	0
EBF2	0	0	1	0	0	0	0	0	0	0	0
EBF3	0	0	1	0	0	0	0	0	0	0	0
ECE2	0	0	0	0	0	0	0	1	0	0	0
ECHDC1	0	0	0	1	0	0	0	0	0	0	0
ECHDC3	0	0	0	0	0	1	0	0	0	0	0
ECM2	0	0	1	0	0	0	0	0	0	0	0
ECT2	0	0	0	0	0	0	0	1	0	0	0
EDA2R	0	0	1	0	0	0	0	0	0	0	0
EDN1	0	0	0	0	0	0	0	0	1	0	0
EDNRB	1	0	0	1	1	0	0	0	0	0	0
EEF1A1P12	0	0	0	0	0	0	0	1	1	0	0
EEF1A1P9	0	0	0	0	0	0	0	0	1	0	0
EEF1DP1	0	0	0	0	0	1	0	0	0	0	0
EEF2KMT	0	0	0	0	0	0	0	1	0	0	0
EEPD1	0	0	1	0	0	0	0	0	0	0	0
EFCAB10	0	0	0	0	0	0	0	0	0	0	1
EFCAB12	0	0	0	0	1	0	0	0	0	0	0
EFCAB13	0	0	0	0	0	0	0	0	0	0	1
EFCAB6	0	0	1	1	1	1	0	0	0	1	1
EFEMP1	0	0	1	0	0	0	0	0	0	0	1
EFNA3	0	0	0	0	0	0	0	0	1	0	0
EFNA4	0	0	0	0	0	0	0	0	1	0	0
EFNA5	0	0	0	0	0	0	0	0	1	0	0
EFNB3	0	0	1	0	1	0	1	0	1	0	0
EFR3B	0	0	0	0	1	0	0	0	0	0	0
EGFLAM	0	0	1	1	1	0	1	0	1	1	0
EGFR	0	0	0	0	0	0	0	0	1	0	0
EGLN3	0	1	0	1	0	0	1	1	0	0	1
EGR1	0	0	1	0	0	0	0	0	0	0	0
EGR2	1	0	0	1	0	0	0	1	0	1	0
EGR3	0	0	1	0	0	0	0	0	0	0	0
EHBP1	0	0	0	0	0	0	0	1	0	0	0
EHD2	0	0	0	0	0	0	1	0	0	0	1
EHHADH	0	1	1	1	0	0	1	1	0	0	1
EID3	0	0	0	0	0	0	1	0	0	0	0
EIF1B-AS1	0	0	0	0	0	0	0	0	0	0	1
EIF3EP1	0	0	0	0	0	0	0	0	0	0	1
EIF4A1	0	0	0	0	0	0	0	0	0	0	1
EIF4BP6	0	0	1	1	0	0	0	1	0	1	0
EIF4E3	0	0	0	0	1	0	0	0	0	0	0
EIF5AL1	0	0	0	0	0	1	0	0	0	0	0
EIPR1	0	0	0	0	0	0	0	1	0	0	0
ELAC1	0	1	1	0	0	0	0	0	0	0	0
ELF3-AS1	0	0	0	0	0	0	0	1	0	0	0
ELL3	0	0	0	0	0	0	0	1	0	0	0
ELMO1	0	0	0	0	0	0	1	0	0	0	0
ELMOD3	0	0	1	1	0	1	1	0	0	0	1
ELOVL7	0	0	0	0	0	0	0	1	0	0	0
EMC9	0	0	0	0	0	1	0	0	0	0	0
EMCN	0	0	1	0	0	0	0	0	0	0	0
EME1	0	0	0	0	0	0	0	1	0	0	0
EME2	0	0	0	0	0	1	0	0	0	0	0
EMID1	0	0	0	1	0	1	0	1	1	0	0
EMILIN2	0	0	0	0	0	0	1	0	0	0	0
EMP1	0	0	1	0	0	0	0	0	0	0	0
ENO2	0	0	0	0	1	0	0	0	0	0	0
ENPEP	0	0	1	0	0	0	0	0	0	0	0
ENPP2	0	0	1	0	0	0	0	0	0	0	0
ENTPD7	0	0	1	0	0	0	1	0	0	0	0
EOGT	0	0	1	0	0	0	0	0	0	0	0
EOGT-DT	0	0	0	0	0	0	0	0	0	0	1
EOLA1	0	0	0	0	0	1	0	0	0	0	0
EOLA1-DT	0	0	0	0	0	0	0	0	0	0	1
EPAS1	0	0	1	0	0	0	0	0	0	0	0
EPB41L2	0	0	0	1	0	0	1	1	1	0	0
EPB41L4A-AS1	0	0	1	0	1	1	1	0	0	1	0
EPB41L4B	0	1	0	0	0	0	0	0	0	0	0
EPDR1	0	0	1	0	0	0	0	0	0	0	0
EPHA2	0	0	0	0	0	0	0	0	1	0	0
EPHA4	0	0	1	0	0	0	0	0	0	0	0
EPHB2	0	0	0	0	0	0	1	0	0	0	0
EPHB6	0	0	0	0	0	0	0	0	1	0	0
EPHX4	0	0	0	0	0	0	0	0	0	1	0
EPM2A	0	0	0	0	0	0	0	0	1	0	0
EPM2A-DT	0	0	0	0	0	0	0	0	0	0	1
EPS8	0	0	1	0	0	0	0	0	0	0	0
EPS8L1	0	0	0	0	0	1	0	0	0	0	0
EPSTI1	0	0	0	0	0	0	1	0	0	0	0
ERCC6L	0	0	0	0	0	0	0	1	0	0	0
ERG	0	0	1	0	0	0	0	0	0	0	0
ERP27	0	1	0	0	0	0	0	0	0	0	0
ERVMER34-1	0	0	0	0	0	0	0	1	0	0	0
ESAM	0	0	1	0	0	0	0	0	0	0	0
ESCO2	0	0	0	0	0	0	0	1	0	0	0
ESM1	0	0	0	0	0	0	0	1	0	0	0
ESPL1	0	0	0	0	0	0	0	1	0	0	0
ESRP2	0	0	0	0	0	1	0	0	0	0	0
ETNK2	0	0	0	0	0	1	0	0	0	0	0
ETS2	0	0	1	0	0	0	0	0	0	0	0
ETV1	0	0	1	0	0	0	0	0	0	0	0
ETV2	0	0	0	0	0	1	0	0	0	0	0
ETV5	0	0	0	0	0	0	0	0	1	0	0
ETV7	0	0	0	1	0	0	0	0	1	0	0
EVA1B	0	0	0	0	0	1	0	0	0	0	0
EVA1C	0	0	0	0	0	0	1	0	0	0	0
EVC2	0	0	1	0	0	0	0	0	0	0	0
EVL	0	0	0	0	1	0	0	0	0	0	0
EXO1	0	0	0	0	0	0	0	1	0	0	0
EXOSC4	0	0	0	1	0	1	0	1	0	1	0
EYA2	0	0	0	0	0	0	0	0	1	0	0
EYS	0	0	0	0	0	0	0	0	0	0	1
EZH1	0	0	0	0	0	0	0	0	0	0	1
EZH2	0	0	0	0	0	0	0	1	0	0	0
F10	0	0	1	0	0	0	0	0	0	0	0
F12	0	0	0	0	0	1	0	0	0	1	1
F13A1	0	0	1	0	0	0	0	0	0	0	0
F2RL3	0	0	0	0	0	0	1	0	0	0	0
F3	0	0	1	0	0	0	0	0	0	0	0
F8	0	0	1	0	0	0	0	0	0	0	0
FAAH2	0	0	0	0	1	0	0	0	0	0	0
FAAP24	0	0	0	0	0	0	0	1	0	0	0
FABP5	0	1	1	1	0	0	1	0	1	0	1
FADD	0	0	0	0	0	1	0	0	0	0	0
FADS2	0	0	0	0	0	0	0	1	0	0	0
FADS3	0	0	0	0	0	0	1	0	0	0	0
FAM107A	0	0	0	0	0	0	0	0	1	0	0
FAM110A	0	0	0	0	0	1	0	0	0	0	0
FAM111B	0	1	0	1	0	0	0	1	0	0	0
FAM124A	0	0	0	0	0	0	0	0	1	0	0
FAM124B	0	0	1	0	0	0	0	0	0	0	0
FAM126A	0	0	0	0	0	0	0	0	1	0	0
FAM135A	0	0	0	0	0	0	0	0	1	0	0
FAM13A	0	0	0	0	0	0	0	0	1	0	0
FAM13A-AS1	0	0	0	0	1	0	0	0	1	0	0
FAM149A	0	0	1	0	0	0	0	0	0	0	0
FAM151B	0	0	0	0	1	0	0	0	0	0	0
FAM151B-DT	0	0	0	0	1	0	0	0	0	0	0
FAM171A1	0	0	0	0	0	0	0	0	1	0	0
FAM171A2	0	0	0	0	0	0	0	1	0	0	0
FAM184A	0	0	0	0	0	0	0	1	0	0	0
FAM184B	0	0	0	0	0	1	0	0	0	0	0
FAM189A2	0	0	1	0	0	0	0	0	0	0	0
FAM20A	0	0	0	0	0	0	1	0	0	0	0
FAM219B	0	0	0	0	1	0	0	0	0	0	0
FAM222A	0	0	0	0	1	0	0	0	0	0	0
FAM228B	0	0	0	0	0	0	0	0	0	0	1
FAM241B	0	0	0	0	0	1	0	0	0	0	0
FAM43A	0	0	0	0	0	1	1	0	0	0	0
FAM47E	0	0	0	0	1	0	0	0	0	0	0
FAM53A	0	0	0	0	0	1	0	0	0	0	0
FAM71E1	0	0	0	0	0	1	0	0	0	0	0
FAM83D	0	0	0	0	0	0	0	1	0	0	0
FAM83G	0	0	0	0	0	1	0	0	0	0	0
FAM83H	0	0	0	0	0	1	0	0	0	0	0
FAM86C1P	0	0	0	0	1	0	0	0	0	0	0
FAM89A	0	0	1	1	0	0	0	0	0	1	0
FANCA	0	0	0	0	0	0	0	1	0	0	0
FANCB	0	0	0	0	0	0	0	1	0	0	0
FANCD2	0	0	0	0	0	0	0	1	0	0	0
FANCF	0	0	0	0	1	0	0	0	0	0	0
FANCI	0	1	0	1	0	0	0	1	0	1	0
FANK1	0	0	1	1	1	1	0	0	0	0	1
FAP	0	0	1	0	0	0	0	0	0	0	0
FAT1	0	1	1	1	0	0	0	0	1	0	1
FAT2	0	0	0	0	0	0	0	0	1	0	0
FAT4	0	0	1	0	0	0	0	0	0	0	0
FAXDC2	0	0	0	0	0	1	0	0	0	0	0
FBF1	0	0	0	0	0	1	0	0	0	0	0
FBLN5	0	1	1	1	0	0	1	1	1	0	1
FBLN7	0	0	1	0	0	0	0	0	0	0	0
FBN2	0	0	0	0	0	0	0	1	0	0	0
FBXL16	0	0	0	0	1	0	0	0	0	0	0
FBXL19	0	0	0	0	0	1	0	0	0	0	0
FBXL19-AS1	0	0	0	0	1	0	0	0	0	0	0
FBXL22	0	0	0	0	0	0	0	0	0	0	1
FBXL6	0	0	0	1	0	0	0	0	0	1	1
FBXO17	0	0	0	0	0	0	0	0	1	0	0
FBXO27	0	0	0	0	0	0	0	0	1	0	0
FBXO31	0	0	0	0	0	0	1	0	0	0	0
FBXO41	0	0	0	0	0	0	0	0	0	0	1
FBXO43	0	0	0	0	0	0	0	1	0	0	0
FBXO5	0	0	0	0	0	0	0	1	0	0	0
FBXO6	0	0	0	0	0	0	1	0	0	0	0
FBXW7	0	0	0	0	0	0	0	0	0	0	1
FCGR1A	0	0	0	0	0	0	1	0	0	0	0
FCGR3A	0	0	0	0	0	0	1	0	0	0	0
FCMR	0	0	0	0	0	1	0	1	0	0	1
FDX2	0	0	0	0	0	1	0	0	0	0	0
FDXR	0	0	0	0	0	1	0	0	0	0	0
FEN1	0	0	0	0	0	0	0	1	0	0	0
FER	0	0	1	0	0	0	0	0	0	0	0
FERMT2	0	0	1	0	0	0	0	0	0	0	0
FES	0	0	0	0	0	0	1	0	0	0	0
FEZ1	0	0	1	0	0	0	0	0	0	0	0
FFAR4	0	0	0	0	0	0	1	0	0	0	0
FGD3	0	0	0	0	0	1	0	0	0	0	0
FGD4	0	0	1	0	0	0	0	0	0	0	0
FGD5	0	0	1	0	0	0	0	0	0	0	0
FGF1	0	0	1	0	0	0	0	0	0	0	0
FGF2	0	0	1	0	0	0	0	0	0	0	0
FGF7	0	0	1	0	0	0	0	0	0	0	0
FGFR1	0	0	0	0	1	0	0	0	0	0	0
FGFR3	0	0	0	0	1	0	0	0	0	0	0
FGFR4	0	0	0	0	0	0	0	1	0	0	0
FGL2	0	0	0	0	0	0	1	0	0	0	0
FHAD1	0	0	0	0	0	0	0	0	0	0	1
FHDC1	0	0	0	0	1	0	0	0	0	0	0
FHL1	0	0	1	0	0	0	0	0	0	0	0
FHOD3	0	0	1	0	0	0	0	0	0	0	0
FIGN	0	0	0	0	0	0	0	0	1	0	0
FILIP1	0	0	1	0	0	0	0	0	0	0	0
FILIP1L	0	0	0	0	0	0	1	0	0	0	1
FKBPL	0	0	0	0	0	1	0	0	0	0	0
FLAD1	0	0	0	0	0	0	0	1	0	0	0
FLI1	0	0	0	0	0	0	1	0	0	0	0
FLNC	0	0	1	0	0	0	0	0	0	0	0
FLT1	0	0	1	0	0	0	0	0	0	0	0
FLT4	0	0	1	0	0	0	0	0	0	0	0
FLVCR1	0	0	0	0	0	0	0	1	0	0	0
FLVCR1-DT	0	0	0	1	0	0	0	0	0	0	0
FMNL2	0	0	0	0	0	0	0	0	1	0	0
FMO2	0	0	1	0	0	0	0	0	0	0	0
FMO3	0	1	1	1	0	0	1	1	1	0	1
FMOD	0	0	1	0	0	0	0	0	0	0	0
FN1	0	0	1	0	0	0	0	0	0	0	0
FNDC1	0	0	1	0	0	0	0	0	0	0	0
FNDC10	0	0	0	0	0	1	0	0	0	0	0
FNDC4	0	0	0	0	0	0	0	0	1	0	0
FNIP2	0	0	1	0	0	0	0	0	0	0	0
FOLH1	0	0	0	0	0	0	0	0	1	0	0
FOLR2	0	0	0	0	0	0	1	0	0	0	0
FOS	0	0	1	0	0	0	0	0	0	0	0
FOSB	0	0	1	0	0	0	0	0	0	0	0
FOXA1	0	0	0	0	1	0	0	0	0	0	0
FOXC1	0	0	0	0	0	0	0	0	1	0	0
FOXD2	0	0	0	0	1	0	0	0	0	0	0
FOXD2-AS1	0	0	0	0	0	0	0	1	0	0	0
FOXM1	0	0	0	0	0	0	0	1	0	0	0
FOXN2	0	0	0	0	0	0	1	0	0	0	0
FOXN3	0	0	1	0	0	0	0	0	0	0	0
FOXO1	0	0	1	0	0	0	0	0	0	0	0
FOXO4	0	0	1	0	0	0	0	0	0	0	0
FOXO6	0	0	0	0	0	1	0	0	0	0	0
FOXP3	0	1	1	0	0	0	1	0	0	0	1
FOXP4-AS1	0	0	0	0	0	0	0	0	1	0	0
FOXS1	0	0	1	0	0	0	0	0	0	0	0
FRAS1	0	0	1	0	0	0	0	0	0	0	0
FRMD3	0	0	0	0	0	0	0	0	1	0	0
FRMD4A	0	0	0	0	0	0	0	0	1	0	0
FRY	0	0	0	0	1	0	0	0	0	0	0
FRZB	0	0	1	0	0	0	0	0	0	0	0
FSD1L	0	0	0	0	0	0	0	0	0	1	0
FSIP1	0	0	0	0	1	0	0	0	0	0	0
FTO	1	0	0	1	0	0	0	0	0	0	0
FTX	0	0	0	0	0	0	0	1	0	0	0
FUT10	0	1	1	1	0	0	1	1	0	0	1
FUT4	0	0	0	0	0	0	1	0	0	0	0
FXYD3	0	0	0	0	1	0	0	0	0	0	0
FXYD6	0	0	0	0	0	0	0	0	1	0	0
FYN	0	0	1	0	0	0	1	0	1	0	0
FZD2	0	0	0	0	0	1	0	0	0	0	0
FZD4	0	0	1	0	0	0	0	0	0	0	0
FZD5	0	0	0	0	0	0	0	0	0	0	1
FZD7	0	0	0	0	0	0	0	0	1	0	0
G0S2	0	0	1	0	0	0	0	1	0	0	1
GAB3	0	0	0	0	0	0	1	0	0	0	0
GABARAPL1	0	0	1	0	0	0	0	0	0	0	0
GABPB1-AS1	0	0	0	0	0	0	0	0	0	0	1
GABRE	0	0	0	0	0	0	0	0	1	0	0
GADD45G	0	0	0	0	0	1	0	0	0	0	0
GALE	0	0	0	0	0	1	0	0	0	0	0
GALNT12	0	0	0	0	0	0	1	0	0	0	0
GALNT14	0	0	0	0	0	0	0	1	0	0	0
GALNT15	0	0	1	0	0	0	0	0	0	0	0
GALNT16	0	0	0	0	0	0	0	0	0	1	0
GALNT6	0	0	0	0	1	0	0	0	0	0	0
GALNT7	0	0	0	0	1	0	0	0	0	0	0
GALT	0	0	0	0	0	0	1	0	0	0	0
GAN	0	0	0	0	0	0	0	0	1	0	0
GAPDHP1	0	0	0	0	0	1	1	0	0	0	0
GAPLINC	0	0	1	0	0	0	0	0	0	0	0
GAPT	0	0	0	0	0	0	1	0	0	0	0
GAREM1	0	0	1	0	0	0	0	0	0	0	0
GAS1	0	0	1	0	0	0	0	0	0	0	0
GAS2L3	0	0	0	0	0	0	0	1	0	0	0
GAS7	0	0	1	0	0	0	0	0	0	0	0
GASAL1	0	0	0	0	0	0	0	1	0	0	0
GATA6	0	0	0	0	0	0	0	0	1	0	0
GBAP1	0	0	0	0	0	0	0	0	0	0	1
GBE1	0	0	0	1	0	0	0	1	0	1	0
GBP5	0	0	1	1	0	0	1	0	0	0	0
GCAT	0	0	0	0	0	1	0	0	0	0	0
GCNA	0	0	0	0	0	0	0	0	0	0	1
GDF15	0	0	0	0	1	0	0	0	0	0	0
GDF9	0	0	1	0	0	0	0	0	0	0	0
GDPD1	0	0	0	0	1	0	0	0	0	0	0
GDPD5	0	0	0	0	0	0	0	0	1	0	0
GDPGP1	0	0	0	0	1	0	0	0	0	0	0
GEM	0	0	1	0	0	0	0	0	0	0	0
GEMIN7-AS1	0	0	0	0	0	0	0	0	0	0	1
GEMIN8P4	1	1	0	1	1	1	1	0	1	1	1
GEN1	0	0	0	0	0	0	0	1	0	0	0
GET4	0	0	0	0	0	1	0	0	0	0	0
GFER	0	0	0	0	0	1	0	0	0	0	0
GFOD1	0	0	0	0	0	0	0	0	1	0	0
GFUS	0	0	0	1	0	0	0	1	0	0	0
GGH	0	0	0	0	0	0	0	1	0	0	0
GGTA1	0	0	0	0	0	0	1	0	0	0	0
GHR	0	0	1	0	0	0	0	0	0	0	0
GIMAP1	0	0	0	0	0	0	1	0	0	0	0
GIMAP5	0	0	0	0	0	0	1	0	0	0	0
GIMAP6	0	0	1	0	0	0	0	0	0	0	0
GIMAP7	0	0	0	0	0	0	1	0	0	0	0
GIMAP8	0	0	1	0	0	0	1	0	1	0	1
GINS1	0	0	0	0	0	0	0	1	0	0	0
GINS2	0	0	0	0	0	0	0	1	0	0	0
GINS4	0	0	0	0	0	0	0	1	0	0	0
GIPC2	0	0	1	0	0	0	0	0	0	0	0
GJB2	0	1	0	0	0	0	0	0	0	0	0
GK	0	1	0	0	0	0	0	0	0	0	0
GLDN	0	0	0	0	1	0	0	0	0	0	0
GLI2	0	0	1	0	0	0	0	0	0	0	0
GLIDR	0	0	0	0	1	0	0	0	0	0	0
GLT8D2	0	0	1	0	0	0	0	0	0	0	0
GLYCTK	0	0	0	0	0	1	0	0	0	0	0
GMIP	0	0	0	0	0	0	1	0	0	0	0
GNAI1	0	1	0	0	0	0	1	0	0	1	1
GNAL	0	0	1	0	0	0	0	0	0	0	0
GNAZ	0	0	0	0	0	0	0	0	0	1	0
GNB1L	0	0	0	0	0	1	0	0	0	0	0
GNG11	0	0	1	0	0	0	0	0	0	0	0
GNG2	0	0	1	0	0	0	0	0	0	0	0
GNG7	0	0	0	0	0	0	0	0	1	0	0
GNRH1	0	0	0	0	0	0	0	0	0	0	1
GOLGA8A	0	0	0	0	0	0	0	0	0	0	1
GOLGA8B	0	0	0	0	0	0	0	0	0	0	1
GOLGA8N	0	0	0	0	0	0	0	0	0	0	1
GORAB-AS1	0	0	0	0	0	0	0	1	0	0	0
GPAM	0	0	1	0	0	0	0	0	0	0	0
GPAT2	0	0	1	0	0	0	0	0	0	0	0
GPAT3	0	0	0	0	0	0	0	0	1	0	0
GPATCH11	0	0	0	0	0	0	0	1	0	0	0
GPATCH2	0	0	0	0	1	0	0	0	0	0	0
GPC3	0	0	1	0	0	0	0	0	0	0	0
GPER1	0	0	0	0	1	0	0	0	0	0	0
GPLD1	0	0	1	1	1	0	1	1	0	1	1
GPM6B	0	0	0	0	0	0	0	0	1	0	0
GPR132	0	0	0	1	0	1	0	0	1	0	1
GPR135	0	0	0	0	0	0	0	0	0	0	1
GPR137C	0	0	0	0	0	0	0	1	0	0	0
GPR146	0	0	1	1	0	0	0	0	1	0	0
GPR155	0	0	0	0	0	0	1	0	0	0	0
GPR160	0	0	0	0	0	1	0	0	0	0	0
GPR19	0	1	0	0	0	0	0	1	1	0	1
GPR199P	0	0	0	0	0	0	0	0	0	0	1
GPR34	0	0	1	0	0	0	0	0	0	0	0
GPR35	0	0	0	0	0	0	0	0	0	0	1
GPR65	0	0	0	0	0	0	1	0	0	0	0
GPR68	0	0	1	0	0	0	0	0	0	0	0
GPR89A	0	1	0	0	0	0	0	0	0	0	0
GPR89B	0	0	0	0	0	0	0	0	0	0	1
GPRASP1	0	0	1	0	0	0	0	0	0	0	0
GPRASP2	0	0	0	0	1	0	0	0	0	0	0
GPRC5A	0	0	0	0	1	0	0	0	0	0	0
GPRC5B	0	0	0	0	0	0	0	0	1	0	0
GPRIN1	0	0	0	0	0	0	0	1	0	0	0
GPSM2	0	0	0	0	0	0	0	1	0	0	0
GPT	0	0	0	0	0	1	0	0	0	0	0
GPX3	0	0	1	0	0	0	0	0	0	0	0
GRAMD1C	0	0	0	0	1	0	0	0	0	0	0
GRAMD2A	1	1	1	0	0	0	1	1	0	0	0
GRAMD2B	0	0	0	0	0	0	0	0	1	0	0
GREB1L	0	0	0	0	1	0	0	0	0	0	0
GRID1	0	0	1	0	0	0	0	0	0	0	0
GRIK5	0	0	0	0	0	0	0	0	0	0	1
GRIN2C	0	0	0	0	0	0	0	0	0	1	0
GRIN2D	0	0	0	0	0	0	0	0	1	0	0
GRIN3A	0	0	0	0	0	0	1	0	0	0	0
GRK3	0	0	1	0	0	0	0	0	0	0	0
GRK5	0	0	1	0	0	0	0	0	0	0	0
GRTP1	0	0	0	0	0	1	0	0	0	0	0
GSDME	0	0	1	0	0	0	0	0	0	0	0
GSEC	0	0	0	0	0	0	0	0	1	0	0
GSK3B-DT	0	0	0	0	0	0	0	0	0	0	1
GSN	0	0	1	0	0	0	0	0	0	0	0
GSPT2	0	0	1	0	0	0	0	0	0	0	0
GSTM2	0	0	0	0	0	1	0	0	0	0	0
GTDC1	0	0	0	0	0	0	1	0	0	0	0
GTF2IRD1	0	0	0	0	0	1	0	0	0	0	0
GTF2IRD2	0	0	0	0	0	1	0	0	0	0	0
GTF2IRD2B	0	0	0	0	1	0	0	0	0	0	0
GTPBP3	0	0	0	0	0	1	0	0	0	0	0
GTSE1	0	0	0	0	0	0	0	1	0	0	0
GUCY1A1	0	0	1	0	0	0	0	0	0	0	0
GUCY1A2	0	0	1	0	0	0	0	0	0	0	0
GULP1	0	0	1	0	0	0	0	0	0	0	0
GVINP1	0	0	0	0	0	0	1	0	0	0	0
GYG2	0	0	1	0	0	0	0	0	0	0	0
GYPC	0	0	0	0	0	0	1	0	0	0	0
H1-2	0	0	0	1	0	0	0	0	0	0	0
H2AX	0	0	0	0	0	0	0	1	0	0	0
H2BC12	0	0	0	1	0	0	0	0	0	0	0
H2BC20P	0	0	0	1	0	0	0	0	0	0	0
H2BC21	0	0	0	1	0	0	0	0	0	0	0
H2BC4	0	0	0	1	0	0	0	0	0	0	0
H2BC5	0	0	0	1	0	0	0	0	0	0	0
H3P14	0	0	0	0	0	0	0	1	0	0	0
H3P47	0	0	0	0	0	0	0	1	0	0	0
H4-16	0	0	0	1	0	0	0	0	0	0	0
H4C8	0	0	0	1	0	0	0	0	0	0	0
H4C9	0	0	0	1	0	0	0	0	0	0	0
HAAO	0	0	0	0	0	0	1	0	0	0	0
HABP4	0	0	0	0	0	0	1	0	0	0	0
HACD1	0	0	0	0	0	0	0	0	1	0	0
HARBI1	1	1	0	0	1	0	1	1	0	1	0
HAS3	0	0	1	0	0	0	0	0	0	0	0
HASPIN	0	0	0	0	0	0	0	1	0	0	0
HAUS7	0	0	0	0	0	1	0	0	0	0	0
HAUS8	0	0	0	0	0	0	0	1	0	0	0
HBEGF	0	0	1	1	0	0	0	0	1	0	0
HCG11	0	0	0	0	0	0	0	0	1	0	0
HCN3	0	0	0	0	0	1	0	0	0	0	0
HDAC10	0	0	0	0	1	1	0	1	0	0	0
HDAC11	0	0	0	1	0	0	0	1	0	1	1
HDAC4	0	0	0	0	0	0	0	0	1	0	0
HELLS	0	0	0	0	0	0	0	1	0	0	0
HELZ2	0	0	0	0	0	0	1	0	0	0	0
HERC2P2	0	0	0	0	0	0	0	0	0	0	1
HERC2P9	0	0	0	0	0	0	0	0	0	0	1
HES4	0	0	0	1	0	0	1	1	1	0	1
HES6	0	0	0	0	0	1	0	0	0	0	0
HEY2	0	0	1	0	0	0	0	0	0	0	0
HEYL	0	0	1	0	0	0	0	0	0	0	0
HGF	0	0	1	1	1	0	1	0	0	0	1
HGH1	0	0	0	0	0	1	0	0	0	0	0
HIC1	0	0	1	0	0	0	0	0	0	0	0
HID1	0	0	0	0	1	0	0	0	0	0	0
HJURP	0	0	0	0	0	0	0	1	0	0	0
HK3	0	0	0	0	0	0	1	0	0	0	0
HLF	0	0	1	0	0	0	0	0	0	0	0
HMCN1	0	0	1	0	0	0	0	0	0	0	0
HMCN2	0	0	0	0	1	0	0	0	0	0	0
HMGA1	0	0	0	0	0	0	0	1	0	0	0
HMGB3	0	0	0	0	0	0	0	1	0	0	0
HMGN2P46	0	0	1	0	1	0	1	0	0	1	0
HMGN3-AS1	0	0	0	0	0	0	0	0	1	0	0
HMMR	0	0	0	0	0	0	0	1	0	0	0
HNRNPA1P16	0	0	0	0	0	0	0	0	0	0	1
HOMER3	0	0	0	0	0	0	0	0	1	0	0
HOPX	0	0	1	0	0	0	0	0	0	0	0
HOTAIRM1	0	0	0	0	0	0	0	0	1	0	0
HOXA1	0	1	0	0	0	0	0	0	0	1	0
HOXA10	0	0	0	0	0	0	0	1	0	0	0
HOXA5	0	0	1	0	0	0	0	0	0	0	0
HOXB-AS1	0	0	0	0	0	1	0	0	0	0	0
HOXB5	0	0	0	0	1	0	0	0	0	0	0
HOXB6	0	0	0	0	0	1	0	0	0	0	0
HOXB9	0	1	1	0	0	0	0	0	0	0	1
HOXC4	0	0	0	0	0	1	0	0	0	0	0
HOXD8	0	0	1	0	0	0	0	0	0	0	0
HOXD9	0	0	0	1	0	0	0	0	0	0	0
HPGDS	0	0	1	0	0	0	0	0	0	0	0
HRH1	0	0	1	0	0	0	0	0	0	0	0
HROB	0	0	0	0	0	0	0	1	0	0	0
HS3ST1	0	0	0	0	0	0	1	0	0	0	0
HSD11B1	0	1	1	1	0	0	1	1	1	0	1
HSD11B2	0	0	0	0	0	1	0	0	0	0	0
HSD17B11	0	0	1	0	0	0	0	0	0	0	0
HSD17B6	0	0	0	0	0	0	0	1	0	0	0
HSD17B7	0	0	0	0	0	1	0	0	0	0	0
HSF2BP	0	0	0	0	0	0	0	1	0	0	0
HSH2D	0	0	0	0	1	0	0	0	0	0	0
HSPA12A	1	0	0	0	1	0	0	0	0	0	1
HSPA12B	0	0	1	0	0	0	0	0	0	0	0
HSPA4L	0	0	0	0	0	0	0	1	0	0	0
HSPA6	0	1	0	0	0	0	0	0	0	0	0
HSPB7	0	0	0	1	0	0	0	0	0	0	0
HSPB8	0	0	0	0	1	0	0	0	0	0	0
HUNK	0	0	0	0	0	0	0	1	0	0	0
HYAL1	0	0	1	0	0	0	0	0	0	0	0
HYAL3	0	0	0	0	0	1	0	0	0	0	0
HYLS1	0	0	0	0	0	0	0	1	0	0	0
ICA1L	0	0	0	0	1	0	0	0	0	0	0
ICAM2	0	0	0	0	0	0	1	0	0	0	0
ID1	0	0	1	0	0	0	0	0	0	0	0
ID4	0	0	0	0	0	0	0	0	1	0	0
IDO1	0	0	0	0	0	0	1	0	0	0	0
IER5L	0	0	0	0	0	1	0	0	0	0	0
IFFO2	0	0	1	1	0	0	1	1	1	1	0
IFI30	0	0	0	0	0	0	1	0	0	0	0
IFI6	0	0	0	0	0	0	1	0	0	0	0
IFNLR1	0	0	0	0	0	0	0	0	1	0	0
IGF2	0	0	1	0	0	0	0	0	0	0	0
IGF2BP2	0	0	0	0	0	0	0	0	1	0	0
IGFBP6	0	0	1	0	0	0	0	0	0	0	0
IGFLR1	0	0	0	0	0	0	1	0	0	0	0
IGHG1	0	0	1	0	0	0	1	0	1	0	1
IGIP	0	0	0	0	1	0	0	0	0	0	0
IGSF9	0	0	0	0	0	1	0	1	1	0	0
IHO1	0	0	0	0	0	0	0	0	0	0	1
IKBKE	0	1	0	1	0	1	1	0	1	0	1
IKZF3	0	0	1	1	0	0	1	0	1	0	1
IL11RA	0	0	0	0	0	0	0	0	0	0	1
IL12RB1	0	0	0	0	0	0	1	0	0	0	0
IL17RD	0	0	0	0	0	0	0	0	1	0	0
IL18	0	1	1	1	0	0	1	1	1	0	1
IL1R1	0	0	1	0	0	0	0	0	0	0	0
IL1RAP	0	0	0	0	0	0	0	0	1	0	0
IL1RN	0	0	0	0	0	0	1	0	0	0	0
IL21R	0	0	0	0	0	0	1	0	0	0	0
IL23A	0	0	0	0	0	0	1	0	0	0	0
IL34	0	0	0	0	0	0	0	0	1	0	0
IL4I1	0	0	0	0	0	0	1	0	0	0	0
IL6R	0	0	0	0	0	0	1	0	0	0	0
INCENP	0	0	0	0	0	0	0	1	0	0	0
ING3	0	0	0	0	0	0	0	0	1	0	0
INHBA	0	0	1	0	0	0	0	0	0	0	0
INHBB	0	0	1	0	0	0	0	0	0	0	0
INKA2	0	0	1	0	0	0	0	0	0	0	0
INPP1	0	1	0	1	0	0	0	1	1	0	0
INSYN2A	0	0	0	0	1	0	0	0	0	0	0
INTS6L	0	0	0	0	0	0	1	0	0	0	0
INTS7	0	0	0	0	0	0	0	1	0	0	0
INTU	0	0	0	0	1	0	0	0	0	0	0
IPO4	0	0	0	0	0	1	0	0	0	0	0
IPPK	0	0	0	0	1	0	0	0	0	0	0
IQCA1	0	0	1	0	0	0	0	0	0	0	0
IQCD	0	0	0	0	0	1	0	0	0	0	0
IQCN	0	0	0	0	0	0	0	0	0	0	1
IQGAP3	0	0	0	0	0	0	0	1	0	0	0
IQSEC3	0	0	0	0	0	0	0	0	0	1	0
IRAG1	0	0	1	0	0	0	0	0	0	0	0
IRAG2	0	0	0	0	0	0	1	0	0	0	0
IRAK1BP1	0	0	0	0	0	0	0	0	0	0	1
IRAK2	0	0	0	0	0	0	1	0	0	0	0
IRAK3	0	0	1	0	0	0	0	0	0	0	0
IRF5	0	0	0	0	0	0	1	0	0	0	0
IRF7	0	0	0	0	0	1	0	0	0	0	0
IRF9	0	0	0	0	0	0	1	0	0	0	0
IRS1	0	0	0	0	1	0	0	0	0	0	0
IRS2	0	0	0	0	0	0	0	0	0	1	0
ISG15	0	0	0	0	0	1	0	0	0	0	0
ISG20	0	0	0	0	0	0	1	0	0	0	0
ISLR2	0	0	1	0	0	0	0	0	0	0	0
ISM1	0	0	1	0	0	0	0	0	0	0	0
ITGA1	0	0	1	0	0	0	0	0	0	0	0
ITGA10	0	0	0	0	0	0	0	0	1	0	0
ITGA2B	0	0	0	0	0	0	0	1	0	0	0
ITGA6	0	0	0	0	0	0	0	0	1	0	0
ITGA7	0	0	1	0	0	0	0	0	0	0	0
ITGA8	0	0	1	0	0	0	0	0	0	0	0
ITGA9	0	0	1	0	0	0	0	0	0	0	0
ITGA9-AS1	0	0	0	0	0	0	0	0	0	0	1
ITGAL	0	0	0	0	0	0	1	0	0	0	0
ITGAX	0	0	0	0	0	0	1	0	0	0	0
ITGB1BP1	0	0	0	0	0	0	0	0	1	0	0
ITGB3	0	0	1	0	0	0	0	0	0	0	0
ITGB8	0	0	0	0	0	0	0	0	1	0	0
ITIH5	0	0	1	0	0	0	0	0	0	0	0
ITM2A	1	0	1	1	0	0	1	0	1	0	1
ITPR1	0	0	0	0	1	0	0	0	0	0	0
ITPRIPL1	0	0	0	0	0	0	1	0	0	0	0
ITSN1	0	0	1	0	0	0	0	0	0	0	0
JADE1	0	0	0	0	1	0	0	0	0	0	0
JAM2	0	0	1	0	0	0	0	0	0	0	0
JAM3	0	0	1	0	0	0	0	0	0	0	0
JAZF1	0	0	1	0	0	0	0	0	0	0	0
JHY	0	0	1	0	0	0	0	0	0	0	0
JMJD4	0	0	0	0	0	1	0	0	0	0	0
JMJD7-PLA2G4B	0	0	0	0	0	1	0	0	0	1	1
JPH4	0	0	1	0	0	0	0	0	0	0	0
JPT1	0	0	0	0	0	0	0	1	0	0	0
JRKL	0	0	0	0	0	0	0	0	1	0	0
KALRN	0	0	0	0	0	0	0	0	1	0	0
KANK1	0	1	0	0	0	0	0	1	0	0	0
KANK3	0	0	1	0	0	0	0	0	0	0	0
KANK4	0	0	0	0	0	0	0	0	1	0	0
KANSL1-AS1	0	0	0	0	0	1	0	0	0	0	0
KANSL1L	0	0	0	0	0	0	0	0	0	0	1
KAT2B	1	1	1	1	1	0	1	1	0	1	1
KATNAL1	0	0	0	0	0	0	0	0	0	1	0
KAZALD1	0	0	0	0	0	0	0	0	0	0	1
KBTBD11	0	0	1	0	0	0	1	0	0	0	1
KBTBD3	0	0	0	0	1	0	0	0	0	0	0
KCNAB1	0	0	0	0	0	0	0	0	1	0	0
KCNC4	0	1	1	1	0	0	1	0	1	1	1
KCND1	0	0	0	0	0	0	1	0	0	0	0
KCNE4	0	0	0	0	1	0	0	0	0	0	0
KCNH2	0	0	0	0	0	0	1	0	0	0	0
KCNIP2	0	0	1	0	0	0	0	0	0	0	0
KCNIP4	0	0	0	0	0	0	0	0	0	0	1
KCNJ11	0	0	0	0	1	0	0	0	0	0	0
KCNJ2	0	0	1	0	0	0	0	0	0	0	0
KCNJ8	0	0	1	0	0	0	0	0	0	0	0
KCNK15	0	0	0	0	1	0	0	0	0	0	0
KCNK6	0	0	0	0	0	1	0	0	0	0	0
KCNMA1	0	0	0	0	1	0	0	0	0	0	0
KCNMB1	0	0	0	0	0	0	0	0	1	0	0
KCNMB3	0	0	0	0	0	0	0	0	0	0	1
KCNN2	0	0	1	0	0	0	0	0	0	0	0
KCNN3	0	0	1	0	0	0	0	0	0	0	0
KCNQ3	0	0	0	0	0	0	0	0	0	1	0
KCTD12	0	0	1	0	0	0	0	0	0	0	0
KCTD13	0	0	0	1	0	0	1	0	0	0	0
KCTD17	0	0	0	0	0	0	1	0	0	0	0
KCTD5	0	0	0	0	0	0	0	1	0	0	0
KDM4B	0	0	0	0	1	0	0	0	0	0	0
KDR	0	0	1	0	0	0	0	0	0	0	0
KHDC1	0	0	0	0	0	0	0	1	0	0	0
KHDC1-AS1	0	0	0	0	0	0	0	0	0	0	1
KIAA0895	0	0	0	0	1	0	0	0	0	0	0
KIAA1109	0	0	0	0	1	0	0	0	0	0	0
KIAA1614	0	0	0	0	0	0	0	0	0	0	1
KIAA1671-AS1	0	0	0	0	0	0	0	0	1	0	0
KIF11	0	0	0	0	0	0	0	1	0	0	0
KIF14	0	1	0	1	0	0	1	1	0	1	1
KIF15	0	1	0	0	0	0	0	0	0	1	0
KIF17	0	0	1	0	0	0	0	0	0	0	0
KIF18A	0	0	0	0	0	0	0	1	0	0	0
KIF20A	0	0	0	0	0	0	0	1	0	0	0
KIF20B	0	0	0	0	0	0	0	1	0	0	0
KIF21A	0	0	0	0	0	0	0	1	0	0	0
KIF22	0	0	0	0	0	1	0	0	0	0	0
KIF23	0	0	0	0	0	0	0	1	0	0	0
KIF24	0	0	0	0	0	0	0	1	0	0	0
KIF26A	0	0	0	1	0	1	1	0	0	0	0
KIF26B	0	0	1	0	0	0	0	0	0	0	0
KIF2C	0	0	0	0	0	0	0	1	0	0	0
KIF4A	0	0	0	0	0	0	0	1	0	0	0
KIFC1	0	0	0	0	0	1	1	1	1	0	1
KIFC2	0	0	0	0	0	1	0	0	0	0	0
KIRREL1	0	0	1	0	0	0	0	0	0	0	0
KIT	0	0	0	0	0	0	0	0	1	0	0
KLB	0	0	1	0	0	0	0	0	0	0	0
KLC2	0	0	0	0	0	1	0	0	0	0	0
KLF11	0	1	1	1	0	0	1	0	1	0	1
KLF16	0	0	0	1	0	1	1	1	1	1	1
KLF2	0	0	1	0	0	0	0	0	0	0	0
KLF3-AS1	0	0	0	0	0	0	0	0	0	0	1
KLF4	0	0	0	1	1	1	0	1	0	0	0
KLF5	0	0	0	0	0	0	0	0	1	0	0
KLF7	0	0	1	0	0	0	0	0	0	0	0
KLF8	0	0	0	0	0	0	0	0	0	0	1
KLF9	0	0	1	0	0	0	0	0	0	0	0
KLHDC1	0	0	0	0	0	1	1	0	0	1	1
KLHDC9	0	0	0	0	0	1	0	0	0	0	0
KLHL13	0	0	0	0	0	0	0	0	1	0	0
KLHL17	0	0	0	1	0	0	1	1	0	0	0
KLHL2	0	0	1	0	0	0	0	0	0	0	0
KLHL21	0	0	0	0	0	0	0	0	1	0	0
KLHL29	0	0	1	0	0	0	0	0	0	0	0
KLHL3	0	0	1	0	0	0	0	0	0	0	0
KLHL31	0	0	0	0	0	0	0	0	1	0	0
KLHL35	0	0	0	0	0	1	0	0	0	0	0
KLHL36	0	0	0	0	0	0	0	0	1	0	0
KLHL6	0	0	0	0	0	0	1	0	0	0	0
KLLN	0	0	0	0	1	0	0	0	0	0	0
KLRB1	0	0	0	0	0	0	1	0	0	0	0
KMO	0	1	1	0	0	0	0	1	0	0	0
KMT5C	0	0	0	0	0	1	0	0	0	0	0
KNL1	0	0	0	1	0	0	0	0	0	1	0
KNOP1	0	0	0	0	0	0	0	1	0	0	0
KNSTRN	0	0	0	0	0	0	0	1	0	0	0
KNTC1	0	0	0	0	0	0	0	1	0	0	0
KPNA2	0	1	0	1	0	0	1	1	0	1	0
KPNA5	0	0	0	0	0	0	1	0	0	0	0
KPTN	0	0	0	0	0	1	0	0	0	0	0
KRT17	0	0	0	0	0	0	0	0	1	0	0
KRT18	0	0	0	0	0	1	0	0	0	0	0
KRT19	0	0	0	0	0	1	0	0	0	0	0
KRT8	0	0	0	0	0	1	0	0	0	0	0
KRT8P33	0	0	0	0	0	1	0	0	0	0	0
KRTCAP2	0	0	0	0	0	1	0	0	0	0	0
KSR1	0	0	0	0	0	0	1	0	0	0	0
L3HYPDH	0	0	0	0	0	0	0	0	0	0	1
L3MBTL1	0	0	0	0	0	0	0	0	0	0	1
L3MBTL2-AS1	0	0	0	0	0	0	0	0	0	0	1
L3MBTL4	0	0	0	0	0	0	0	0	1	0	0
LAG3	0	0	0	0	0	0	1	1	0	1	1
LAGE3	0	0	0	0	0	1	0	0	0	0	0
LAMA1	0	1	0	0	0	0	1	1	1	1	0
LAMA2	0	0	1	0	0	0	0	0	0	0	0
LAMA3	1	0	1	1	1	1	0	0	0	0	1
LAMA4	0	0	0	1	0	0	1	1	0	0	1
LAMB2P1	0	0	0	0	0	0	0	0	0	0	1
LAMB3	0	0	0	0	0	0	0	0	1	0	0
LAMC2	0	0	0	0	0	0	0	0	1	0	0
LAMP3	0	0	0	0	0	0	1	0	0	0	0
LAMTOR2	0	0	0	0	0	1	0	0	0	0	0
LARP6	0	0	0	0	0	0	0	0	1	0	0
LAT2	0	0	0	0	0	0	1	0	0	0	0
LATS2	0	0	1	0	0	0	0	0	0	0	0
LAYN	0	0	1	0	0	0	0	0	0	0	0
LBX2	0	0	0	0	0	0	1	1	0	0	0
LBX2-AS1	0	0	0	0	0	1	0	0	0	0	0
LCA5	0	0	1	0	0	0	0	0	0	0	0
LCA5L	0	0	1	1	1	1	0	1	0	1	1
LCAT	0	0	1	1	0	1	0	1	0	0	1
LDB2	0	0	1	0	0	0	0	0	0	0	0
LDB3	1	0	1	1	1	1	1	0	0	0	1
LDHD	0	0	0	0	1	1	0	0	0	0	1
LDLRAD2	0	0	1	0	0	0	0	0	0	0	0
LEF1	0	0	1	0	0	0	0	0	0	0	0
LEPR	0	0	1	0	0	0	0	0	0	0	0
LETM2	0	0	0	0	1	0	0	0	0	0	0
LGI4	0	0	1	0	0	0	0	0	0	0	0
LGR4	0	0	0	0	0	0	0	1	0	0	0
LHFPL6	0	0	1	0	0	0	0	0	0	0	0
LHX6	0	0	1	0	0	0	0	0	0	0	0
LIF	0	0	0	0	0	0	1	0	0	0	0
LIFR	0	0	1	0	0	0	0	0	0	0	0
LIFR-AS1	0	0	0	0	1	0	0	0	0	0	0
LIG1	0	0	0	0	0	0	0	1	0	0	0
LIG3	0	0	0	0	1	0	0	0	0	0	0
LILRB1	0	0	0	0	0	0	1	0	0	0	0
LILRB4	0	0	0	0	0	0	1	0	0	0	0
LILRB5	0	0	0	0	0	0	1	0	0	0	0
LIMCH1	0	1	0	0	0	0	0	0	0	0	0
LIMD2	0	0	0	0	0	0	1	0	0	0	0
LIME1	0	0	0	0	0	1	0	0	0	0	0
LIMK1	0	0	0	0	0	0	1	0	0	0	0
LIMS2	0	0	1	0	0	0	0	0	0	0	0
LIN7A	0	0	0	0	1	0	0	0	0	0	0
LIN9	0	0	0	0	0	0	0	1	0	0	0
LINC-PINT	0	0	0	0	0	0	0	0	0	0	1
LINC00467	0	0	0	0	1	0	0	0	0	0	0
LINC00526	0	0	0	0	0	0	0	0	0	1	0
LINC00641	0	0	0	0	0	0	0	0	0	0	1
LINC00654	0	0	0	0	1	0	0	0	0	0	0
LINC00663	0	0	0	0	1	0	0	0	0	0	0
LINC00665	0	0	0	0	0	0	0	1	0	0	0
LINC00667	0	0	0	0	0	0	0	0	0	0	1
LINC00702	0	0	1	0	0	0	0	0	0	0	0
LINC00852	0	0	0	0	0	0	0	0	0	0	1
LINC00886	0	0	0	0	1	0	0	0	0	0	0
LINC00888	0	0	0	0	0	0	0	0	1	0	0
LINC00899	0	0	0	0	0	0	0	0	0	0	1
LINC00920	1	1	1	1	0	0	1	1	1	0	1
LINC00921	0	0	0	0	0	0	0	0	0	0	1
LINC00987	0	0	1	0	0	0	0	0	0	0	0
LINC01094	0	1	1	1	0	0	1	1	0	0	0
LINC01119	0	0	0	0	0	0	0	0	1	0	0
LINC01140	0	0	0	0	0	0	0	0	1	0	0
LINC01235	0	0	0	0	0	0	0	0	1	0	0
LINC01301	0	0	0	0	0	0	0	0	1	0	0
LINC01376	0	0	0	0	0	0	0	0	0	0	1
LINC01426	0	0	1	0	0	0	0	0	0	0	0
LINC01569	0	0	0	0	0	1	0	0	0	0	0
LINC01588	0	0	0	0	0	0	0	1	0	0	0
LINC01605	0	0	0	0	0	1	0	0	0	0	0
LINC01719	0	0	0	1	0	0	0	0	0	0	0
LINC01772	0	0	1	0	0	0	1	0	0	0	1
LINC01852	0	0	1	0	0	0	0	0	0	0	0
LINC01963	0	0	1	0	0	0	0	0	0	0	0
LINC02035	0	0	0	0	0	0	0	0	0	0	1
LINC02609	0	0	0	0	0	0	0	0	1	0	0
LINC02693	0	0	0	0	0	0	0	0	1	0	0
LINC02762	0	0	0	0	0	0	0	0	1	0	0
LINC02916	0	0	0	0	0	0	1	1	0	1	0
LINGO1	0	1	1	0	1	1	1	1	0	0	1
LIPE	0	0	1	0	0	0	0	0	0	0	0
LIPE-AS1	0	0	0	0	0	1	0	0	0	0	0
LIX1L	0	0	0	0	0	0	1	0	0	0	0
LLGL2	0	0	0	0	0	1	0	0	0	0	0
LMNB1	0	0	0	1	0	0	1	0	0	1	0
LMNB2	0	1	0	0	0	0	0	1	1	1	0
LMNTD2	0	0	0	0	0	1	0	0	0	0	0
LMO2	0	0	1	0	0	0	0	0	0	0	0
LMOD1	0	0	1	0	0	0	0	0	0	0	0
LMTK3	1	0	1	0	0	1	0	0	0	1	1
LOH12CR2	0	0	1	0	0	1	0	0	0	0	0
LONRF1	0	0	0	0	0	0	0	0	1	0	0
LOXL1	0	0	1	0	0	0	0	0	0	0	0
LOXL4	0	0	0	0	0	0	0	0	1	0	0
LPAR1	0	0	1	0	0	0	0	0	0	0	0
LPAR2	0	0	0	0	0	0	0	1	0	0	0
LPAR6	0	0	1	0	0	0	0	0	0	0	0
LPCAT1	0	0	0	0	0	0	0	1	0	0	0
LPCAT2	0	0	1	0	0	0	0	0	0	0	0
LPIN1	0	0	0	0	0	0	0	0	1	0	0
LPL	0	0	1	0	0	0	0	0	0	0	0
LPP-AS2	0	0	0	0	0	0	0	0	0	0	1
LRCH2	0	0	1	0	0	0	0	0	0	0	0
LRFN1	0	0	0	0	0	0	0	0	1	0	0
LRFN4	0	0	0	0	0	1	0	0	0	0	0
LRGUK	0	0	0	0	0	0	0	0	0	0	1
LRIG3	0	0	0	0	0	0	0	0	1	0	0
LRP1	0	0	1	0	0	0	0	0	0	0	0
LRP4	0	0	1	0	0	0	0	0	0	0	0
LRP8	0	0	0	0	0	0	0	1	0	0	0
LRRC10B	0	0	0	0	0	1	0	0	0	0	0
LRRC34	0	0	0	0	0	0	0	0	1	0	0
LRRC37A17P	0	0	0	0	1	0	0	0	0	0	0
LRRC37A4P	0	0	0	0	0	0	1	0	0	0	0
LRRC45	0	0	0	0	0	1	0	0	0	0	0
LRRC46	0	0	0	0	1	0	0	0	0	0	0
LRRC56	1	0	1	0	0	1	0	0	0	0	0
LRRC61	0	0	0	0	0	1	0	0	0	0	0
LRRC73	0	0	0	0	1	0	0	0	0	0	0
LRRC8C	0	0	0	0	0	0	0	0	1	0	0
LRRK2	0	0	1	0	0	0	0	0	0	0	0
LRRN2	0	0	0	0	1	0	0	0	0	0	0
LRWD1	0	0	0	0	0	1	0	0	0	0	0
LSM4	0	0	0	0	0	1	0	0	0	0	0
LSP1P4	0	0	0	0	0	0	0	0	1	0	0
LSR	0	0	0	0	0	0	0	1	0	0	0
LTB	0	0	0	0	0	0	1	0	0	0	0
LTBP4	0	0	1	0	0	0	0	0	0	0	0
LURAP1	0	0	1	0	0	0	0	0	0	0	0
LY75	0	0	0	0	0	0	1	0	0	0	0
LYNX1	0	0	0	0	0	0	0	0	1	0	0
LYPD6	0	0	0	0	1	0	0	0	0	0	0
LYRM9	0	0	0	0	0	1	0	0	0	0	0
LYSMD4	0	0	0	0	0	0	0	0	1	0	0
LYVE1	0	0	1	0	0	0	0	0	0	0	0
LZTS3	0	0	0	0	0	0	0	0	1	0	0
MACROH2A1	0	0	0	0	0	0	0	1	0	0	0
MAD2L1	0	0	0	0	0	0	0	1	0	0	0
MAF	0	0	1	0	0	0	0	0	0	0	0
MAFF	0	0	0	0	0	0	0	0	1	0	0
MAFG-DT	0	0	0	0	0	0	0	1	0	0	0
MAGI1	0	0	0	0	1	0	0	0	0	0	0
MAGI2	0	0	0	0	1	0	0	0	0	0	0
MAGI2-AS3	0	0	1	0	0	0	0	0	0	0	0
MAGIX	0	0	0	0	0	1	0	0	0	0	0
MAGOHB	0	0	0	0	0	0	0	1	0	0	0
MAMDC2-AS1	0	0	1	0	0	0	0	0	0	0	0
MAML2	0	0	0	0	0	0	0	0	1	0	0
MAMLD1	0	0	0	0	0	0	0	0	1	0	0
MANEAL	0	0	0	0	0	0	0	0	0	1	0
MAOA	0	0	1	0	0	0	0	0	0	0	0
MAOB	0	0	1	0	0	0	0	0	0	0	0
MAP1A	0	0	1	0	0	0	0	0	0	0	0
MAP1B	0	0	1	0	0	0	0	0	0	0	0
MAP2	0	0	0	0	0	0	0	0	1	0	0
MAP2K6	0	0	0	0	0	0	0	0	1	0	0
MAP3K2-DT	0	0	0	0	0	0	1	0	0	0	0
MAP3K20	0	0	1	0	0	0	0	0	0	0	0
MAP3K4-AS1	0	0	1	0	0	0	0	0	0	0	0
MAP3K5	0	0	1	0	0	0	0	0	0	0	0
MAP3K8	0	0	0	0	0	0	1	0	0	0	0
MAP4K1	0	0	0	0	0	0	1	0	0	0	0
MAP6	0	0	0	0	0	0	0	0	0	1	0
MAP6D1	0	0	0	0	0	1	0	1	0	0	1
MAP7D3	0	0	0	0	0	0	1	1	0	1	0
MAPK10	0	0	0	1	0	1	0	1	0	0	0
MAPK15	0	0	0	0	0	1	0	0	0	0	0
MAPK8IP2	0	0	0	0	1	0	0	0	0	0	0
MAPKBP1	0	0	1	1	1	1	1	1	0	1	1
MARCHF9	0	0	0	1	0	0	0	0	0	1	0
MARK1	0	0	0	0	0	0	0	1	0	0	0
MARVELD2	0	0	0	0	1	0	0	0	0	0	0
MARVELD3	1	0	0	0	0	0	0	0	0	0	0
MATN2	0	0	1	0	0	0	0	0	0	0	0
MATN3	0	0	0	0	1	0	0	0	0	0	0
MAZ	0	0	0	0	0	1	0	0	0	0	0
MBLAC1	0	0	0	0	0	1	0	0	0	0	0
MBNL1-AS1	0	0	0	0	0	0	0	0	1	0	0
MBNL2	0	0	1	0	0	0	0	0	0	0	0
MBNL3	0	0	0	0	0	0	1	0	0	0	0
MBOAT2	0	1	0	0	0	0	0	0	0	0	0
MBOAT7	0	0	0	0	0	1	0	0	0	0	0
MBP	0	0	0	0	0	0	1	0	0	0	0
MC1R	0	0	0	0	0	0	0	0	0	0	1
MCAM	0	0	1	0	0	0	0	0	0	0	0
MCC	0	0	0	0	1	0	0	0	0	0	0
MCM10	0	0	0	1	0	0	0	0	0	0	1
MCM2	0	0	0	0	0	0	0	1	0	0	0
MCM4	0	0	0	0	0	0	0	1	0	0	0
MCOLN2	0	0	0	0	0	0	1	0	0	0	0
MCOLN3	0	0	0	0	0	0	0	0	0	0	1
MCRIP2	0	0	0	0	0	1	0	0	0	0	0
MCTP1	0	0	1	0	0	0	0	0	0	0	0
MCTP2	0	0	0	0	0	0	0	0	1	0	0
MDFIC	0	0	1	0	0	0	0	0	0	0	0
ME1	0	0	0	0	0	0	0	1	0	0	0
ME3	0	0	1	1	0	1	1	0	0	1	1
MECOM	0	0	1	0	0	0	0	0	0	0	0
MEDAG	0	0	1	0	0	0	0	0	0	0	0
MEF2C	0	0	1	0	0	0	0	0	0	0	0
MEG3	0	0	0	0	0	0	0	0	0	0	1
MEGF10	0	0	0	0	0	0	0	0	0	1	0
MEIS1	0	0	0	0	0	0	0	0	0	0	1
MEIS2	0	0	1	0	0	0	0	0	0	0	0
MEIS3	0	0	0	0	1	0	0	0	0	0	0
MELK	0	0	0	0	0	0	0	1	0	0	0
MERTK	0	0	0	1	0	0	0	0	0	0	0
MEST	0	0	1	0	0	0	0	0	0	0	0
MET	0	0	1	1	0	0	0	1	1	1	1
METRN	0	0	0	0	0	1	0	0	0	0	0
METTL27	0	0	0	0	0	1	0	0	0	0	0
METTL7A	0	0	1	0	0	0	0	0	0	0	0
MEX3A	0	0	0	0	0	0	0	1	0	0	0
MFAP2	0	0	0	0	0	0	0	0	1	0	0
MFAP4	0	0	1	0	0	0	0	0	0	0	0
MFGE8	0	0	0	0	0	0	0	0	1	0	0
MFNG	0	0	0	0	0	0	1	0	0	0	0
MFSD12	0	0	0	0	0	1	0	0	0	0	0
MFSD2A	0	1	0	0	0	0	0	0	0	0	0
MFSD2B	0	0	0	0	0	0	0	0	1	0	0
MFSD3	0	0	0	0	0	1	0	0	0	0	0
MFSD4A	0	0	0	0	0	0	0	0	1	0	0
MGAT3	0	0	0	0	0	0	1	0	0	0	0
MGLL	0	0	1	0	0	0	0	0	0	0	0
MIAT	0	0	0	0	0	0	1	0	0	0	0
MICAL2	0	0	1	0	0	0	0	0	0	0	0
MICAL3	0	0	0	0	0	0	0	0	1	0	0
MICALL2	0	0	0	0	0	1	0	0	0	0	0
MICB	0	0	1	1	1	0	1	1	0	1	0
MICU3	0	0	1	1	0	0	1	0	1	1	1
MID1	0	0	0	0	0	0	0	0	1	0	0
MIEN1	0	0	0	0	0	1	0	0	0	0	0
MIF	0	0	0	0	0	1	0	0	0	0	0
MINAR1	0	0	0	0	0	0	0	1	0	0	0
MIPOL1	0	0	0	0	1	0	0	0	0	0	0
MIR100HG	0	0	1	0	0	0	0	0	0	0	0
MIR155HG	0	0	0	0	0	0	1	0	0	0	0
MIR17HG	0	0	0	0	0	0	1	1	1	1	1
MIR193BHG	0	0	0	1	0	0	0	0	0	0	0
MIR210HG	0	0	0	0	0	1	0	0	0	0	0
MIR22HG	0	0	1	0	0	0	0	0	0	0	0
MIR23AHG	0	0	0	0	0	0	0	0	0	0	1
MIR3667HG	0	0	0	0	0	0	1	0	0	0	0
MIR3677HG	0	0	0	0	0	1	0	0	0	0	0
MIR4435-2HG	0	0	0	0	0	0	0	0	1	0	0
MIR762HG	0	0	0	0	0	1	0	0	0	0	0
MIRLET7BHG	0	0	1	0	1	1	0	0	0	1	1
MIRLET7IHG	0	0	0	0	0	0	0	0	0	0	1
MIS18A	0	0	0	0	0	0	0	1	0	0	0
MISP3	0	0	0	0	0	1	0	0	0	0	0
MITF	0	0	1	0	0	0	0	0	0	0	0
MKI67	0	0	0	0	0	0	0	1	0	0	0
MKRN2OS	0	0	0	0	1	0	0	0	0	0	0
MLLT11	0	0	0	0	0	0	0	1	0	0	0
MLYCD	0	0	0	0	0	0	0	0	0	0	1
MMD	0	0	1	0	0	0	0	0	0	0	0
MMEL1	0	0	0	0	0	1	0	0	0	0	0
MMP11	0	0	0	0	0	1	0	0	0	0	0
MMP19	0	0	1	0	0	0	0	0	0	0	0
MMP24	0	0	0	0	0	0	0	0	0	1	0
MMP25	0	0	0	0	0	1	0	0	0	0	0
MMP9	0	0	0	0	0	0	1	0	0	1	0
MMRN2	0	0	1	0	0	0	0	0	0	0	0
MND1	0	1	0	0	0	0	1	0	1	1	0
MOB3B	0	0	1	0	0	0	1	0	0	0	1
MOB3C	0	0	0	0	0	0	1	0	0	0	0
MOCS1	0	0	1	0	0	0	0	0	0	0	0
MORN3	0	0	0	0	0	1	0	0	0	0	0
MOXD1	0	1	0	1	0	0	1	1	1	0	0
MPDZ	0	0	1	0	0	0	0	0	0	0	0
MPHOSPH9	0	0	0	0	0	0	0	1	0	0	0
MPZ	0	1	0	0	0	1	0	0	1	0	1
MRAS	0	0	0	0	0	0	0	0	1	0	0
MRC1	0	0	0	0	0	0	1	0	0	0	0
MRGBP	0	0	0	0	0	0	0	1	0	0	0
MRGPRF	0	0	1	0	0	0	0	0	0	0	0
MRO	0	0	1	0	0	0	0	0	0	0	0
MROH6	0	0	0	0	0	1	0	0	0	0	0
MROH8	0	0	0	0	1	0	0	0	0	0	0
MRPL13	0	0	0	0	0	0	0	1	0	0	0
MRPL20-DT	0	0	0	0	0	0	0	0	1	0	0
MRPL53	0	0	0	0	1	1	1	1	1	1	1
MRPS12	0	0	0	0	0	1	0	0	0	0	0
MRPS30-DT	0	0	0	0	1	0	0	0	0	0	0
MS4A14	0	0	0	0	1	0	0	0	0	0	0
MS4A4A	0	0	0	0	0	0	1	0	0	0	0
MSC-AS1	0	0	1	0	0	0	0	0	0	0	0
MSI2	0	0	0	0	1	0	0	0	0	0	0
MSR1	0	0	0	0	0	0	1	0	0	0	0
MSRA	0	0	0	0	0	0	0	0	1	0	0
MSRB3	0	0	1	0	0	0	0	0	0	0	0
MST1R	0	0	0	0	0	1	0	0	0	0	0
MSX1	0	0	0	0	0	1	0	0	0	0	0
MT1X	1	0	1	0	0	1	1	1	0	1	0
MTARC1	0	0	0	0	0	0	0	1	0	0	0
MTBP	0	0	0	0	0	0	0	1	0	0	0
MTCL1	0	0	0	0	1	0	0	0	0	0	0
MTFR2	0	0	0	0	0	0	0	1	0	0	0
MTG1	0	0	0	0	0	1	0	0	0	0	0
MTHFD2	0	0	0	0	0	0	0	1	0	0	0
MTMR10	0	0	0	0	1	0	0	0	0	0	0
MTMR3	0	0	0	0	0	0	0	0	0	0	1
MTMR9LP	0	0	1	0	1	1	1	1	0	1	1
MTURN	0	0	1	0	0	0	0	0	0	0	0
MTX1	0	0	0	0	0	1	0	0	0	0	0
MTX1P1	0	0	0	0	0	0	0	1	0	0	0
MUC1	0	0	0	1	0	0	0	0	0	0	0
MX1	0	0	0	0	0	0	1	0	0	0	0
MXD3	0	0	0	0	0	1	0	0	0	0	0
MXRA7	0	0	1	0	0	0	0	0	0	0	0
MYB	0	0	0	0	1	0	0	0	0	0	0
MYBL1	0	0	0	0	0	0	0	1	0	0	0
MYBL2	0	0	0	0	0	0	0	1	0	0	0
MYCBP2	0	0	1	0	0	0	0	0	0	0	0
MYCT1	0	0	1	0	0	0	0	0	0	0	0
MYEF2	0	0	0	1	1	0	0	0	0	0	0
MYH11	0	0	1	0	0	0	0	0	0	0	0
MYH3	0	0	0	0	0	0	0	0	0	0	1
MYH7B	0	0	0	0	0	0	0	0	0	0	1
MYLK	0	0	1	0	0	0	0	0	0	0	0
MYO15B	0	0	0	0	0	0	0	0	0	0	1
MYO19	0	0	0	0	0	0	0	1	0	0	0
MYO1G	0	0	0	0	0	0	1	0	0	0	0
MYO9A	0	0	1	0	0	0	0	0	0	0	0
MYOM1	0	0	1	0	0	0	0	0	0	0	0
MYZAP	0	0	1	0	0	0	0	0	0	0	0
MZF1-AS1	0	0	0	0	0	0	0	0	0	0	1
MZT2A	0	0	0	0	0	1	0	0	0	0	0
N4BP2L1	0	0	0	0	0	0	1	0	0	0	0
N4BP2L2-IT2	0	0	0	0	0	0	0	0	0	0	1
N4BP3	0	0	0	0	0	1	0	0	0	0	0
NAALAD2	0	0	0	0	0	0	0	0	0	0	1
NAALADL1	0	0	1	0	0	0	0	0	0	0	0
NAALADL2	0	0	0	1	0	0	0	0	0	0	0
NACAD	0	0	0	1	0	0	1	1	0	1	1
NACC1	0	0	0	0	0	0	1	0	0	1	0
NANOS1	0	0	0	0	0	0	0	0	1	0	0
NANS	0	0	0	0	0	1	0	0	0	0	0
NAP1L3	0	0	1	0	0	0	0	0	0	0	0
NAP1L5	0	0	0	1	0	0	0	0	0	0	0
NAPSB	0	0	0	0	0	0	1	0	0	0	0
NAT1	0	0	0	0	1	0	0	0	0	0	0
NAT14	0	0	0	0	1	0	0	0	0	0	1
NAT8L	0	0	0	0	0	1	0	0	0	0	0
NATD1	1	0	1	0	0	1	1	0	0	1	1
NAV2	0	0	0	0	0	0	0	0	1	0	0
NAV3	0	0	1	1	1	0	1	0	0	1	1
NBEAL1	0	0	0	1	0	0	0	0	0	0	0
NBPF20	0	0	0	0	0	0	0	0	0	0	1
NCALD	0	0	0	0	0	0	0	0	1	0	0
NCAM1	0	0	1	0	0	0	1	0	0	0	1
NCAM2	0	0	0	0	1	0	0	0	0	0	0
NCAPG	0	0	0	0	0	0	0	1	0	0	0
NCAPG2	0	0	0	0	0	0	0	1	0	0	0
NCAPH	0	0	0	0	0	0	0	1	0	0	0
NCF1	0	0	0	0	0	0	1	0	0	0	0
NCOA7	0	0	0	0	0	0	0	0	1	0	0
NDC80	0	0	0	0	0	0	0	1	0	0	0
NDE1	0	0	0	0	0	0	0	1	0	0	0
NDN	0	0	1	0	0	0	0	0	0	0	0
NDRG2	0	0	0	0	0	0	0	0	1	0	0
NDRG4	0	0	0	0	0	0	0	1	0	0	0
NDUFA7	0	0	0	1	1	0	1	0	0	1	0
NDUFAF6	0	0	0	0	0	0	0	1	0	0	0
NEB	0	0	0	0	0	0	0	0	0	0	1
NECAB1	0	0	0	1	1	0	0	0	0	0	1
NECAB3	0	0	0	0	1	0	0	0	0	0	0
NECTIN3	0	0	1	0	0	0	0	0	0	0	0
NECTIN4	0	1	0	0	0	0	0	0	0	0	0
NEDD9	0	0	1	0	0	0	0	0	0	0	0
NEFH	0	0	0	0	0	0	0	0	0	1	0
NEGR1	0	0	1	0	0	0	0	0	0	0	0
NEK10	1	0	1	1	1	1	1	0	0	1	1
NEK5	0	0	0	0	1	0	0	0	0	0	0
NELL2	0	0	0	0	1	0	0	0	0	0	0
NES	0	0	0	0	0	0	0	0	0	1	0
NEURL1	0	0	0	0	1	0	0	0	0	0	0
NEXN	0	0	1	1	0	0	1	1	1	0	1
NFAM1	0	0	0	0	0	0	1	0	0	0	0
NFASC	0	0	0	0	0	0	0	0	0	1	0
NFAT5	0	0	1	0	0	0	0	0	0	0	0
NFATC2	0	0	0	0	0	0	1	0	0	0	0
NFE2L3	0	0	0	0	0	0	1	0	0	0	0
NFIB	0	0	0	0	0	0	0	0	1	0	0
NFIL3	0	0	0	0	0	0	0	0	1	0	0
NFKBIE	0	1	0	1	0	0	1	0	0	0	1
NFKBIZ	0	0	1	0	0	0	0	0	0	0	0
NGEF	0	0	0	0	0	0	0	0	1	0	0
NGFR	1	0	0	0	0	0	0	0	0	1	0
NHS	0	0	1	0	0	0	0	0	0	0	0
NIBAN1	0	0	1	0	0	0	0	0	0	0	0
NIFK-AS1	0	0	0	0	0	0	0	0	0	0	1
NIM1K	0	0	0	0	1	0	1	1	0	0	1
NIPSNAP3B	0	0	0	0	0	0	0	0	1	0	0
NKAPP1	0	0	0	0	0	0	0	0	0	0	1
NKD2	0	0	0	0	0	1	0	0	0	0	0
NKILA	0	0	0	0	0	0	0	1	0	0	0
NLGN3	0	0	1	0	0	0	0	0	0	0	0
NLRP1	0	0	0	0	0	0	1	0	0	0	0
NLRP3	0	0	0	0	0	0	1	0	0	0	0
NMB	0	0	0	0	0	0	0	0	1	0	0
NME1	0	0	0	0	0	0	0	1	0	0	0
NME3	0	0	0	0	0	1	0	0	0	0	0
NMNAT2	0	0	1	1	1	0	1	1	0	1	1
NMRAL1	0	0	0	0	0	1	0	0	0	0	0
NMT2	0	1	1	1	0	0	1	1	1	0	1
NOD1	0	0	0	0	0	0	1	0	0	0	0
NOD2	0	0	0	0	0	0	1	0	0	0	0
NOTCH4	0	0	1	0	0	0	0	0	0	0	0
NOVA1	0	0	0	0	1	0	0	0	0	0	0
NOVA2	0	0	1	0	0	0	0	0	0	0	0
NPAS3	0	0	0	0	0	0	0	0	0	0	1
NPHP3	0	0	0	0	0	0	0	0	0	0	1
NPM1P25	0	0	0	0	0	0	1	0	0	0	0
NPNT	0	0	0	0	1	0	0	0	0	0	0
NPR1	0	0	1	0	0	0	0	0	0	0	0
NPR2	0	0	0	0	0	0	0	0	1	1	0
NPR3	0	0	0	0	0	0	0	0	1	0	0
NPTX2	0	1	0	1	0	0	0	1	1	1	1
NR2F1	0	0	1	0	0	0	0	0	0	0	0
NR2F1-AS1	0	0	1	0	0	0	0	0	0	0	0
NR2F6	0	0	0	0	0	1	0	0	0	0	0
NR3C1	0	0	1	0	0	0	0	0	0	0	0
NR3C2	0	0	1	0	0	0	0	0	0	0	0
NR4A1	0	0	1	0	0	0	0	0	0	0	0
NR4A2	0	0	0	0	1	0	0	0	0	0	0
NR4A3	0	0	1	0	0	0	0	0	0	0	0
NR5A2	0	0	1	0	0	0	0	0	0	0	0
NRCAM	0	0	0	0	0	0	0	0	0	1	0
NREP	0	0	1	0	0	0	0	0	0	0	0
NRIP2	0	0	1	0	0	0	0	0	0	0	0
NRN1	0	0	1	0	0	0	0	0	0	0	0
NRP1	0	0	1	0	0	0	0	0	0	0	0
NRROS	0	0	0	0	0	0	1	0	0	0	0
NSD2	0	0	0	0	0	0	0	1	0	0	0
NT5DC3	0	0	0	0	0	0	0	0	0	0	1
NT5E	0	0	0	0	0	0	0	1	0	0	0
NT5M	0	0	0	0	1	1	1	0	0	0	1
NTHL1	0	0	0	0	0	1	0	0	0	0	0
NTN4	0	0	1	0	0	0	0	0	0	0	0
NTNG2	0	0	0	0	0	0	1	0	0	0	0
NTRK2	1	0	0	0	0	0	0	0	0	0	0
NUAK2	0	0	0	0	1	0	0	0	0	0	0
NUBP2	0	0	0	0	0	1	1	0	0	1	0
NUDT1	0	0	0	0	0	1	0	0	0	0	0
NUDT16L1	0	0	0	0	0	1	0	0	0	0	0
NUDT7	1	0	0	0	0	0	0	0	0	0	0
NUF2	0	0	0	0	0	0	0	1	0	0	0
NUP210	0	0	0	0	0	0	0	1	0	0	0
NUSAP1	0	0	0	0	0	0	0	1	0	0	0
NVL	0	0	0	0	0	0	0	1	0	0	0
NYNRIN	0	0	0	0	0	0	0	0	1	0	0
OAS1	0	0	0	0	0	0	1	0	0	0	0
OAS2	0	0	0	0	0	0	1	0	0	0	0
OAS3	0	1	1	0	0	0	0	1	0	1	0
OASL	0	0	0	0	0	0	1	0	0	0	0
OAZ3	0	0	1	1	0	0	1	1	1	0	1
OBSCN	0	0	0	0	0	0	0	0	0	0	1
OCLN	0	0	0	0	1	0	0	0	0	0	0
ODAD1	0	0	0	0	0	1	0	0	0	0	0
ODAD3	0	0	0	0	0	1	0	0	0	0	0
OGFOD2	0	0	0	0	0	1	0	0	0	0	0
OGFRL1	0	0	0	0	0	0	0	0	1	0	0
OIP5	0	0	0	0	0	0	0	1	0	0	0
OLFML1	0	0	0	1	0	0	1	0	0	0	0
OLFML2A	0	0	1	0	0	0	0	0	0	0	0
OLFML2B	0	0	1	0	0	0	0	0	0	0	0
OR2A1-AS1	0	0	1	0	0	1	0	0	0	1	0
OR7E38P	0	0	0	0	0	0	0	1	0	0	0
ORAI2	0	0	0	0	0	1	0	0	0	0	0
ORC1	0	0	0	0	0	0	0	1	0	0	0
ORC6	0	0	0	0	0	0	0	1	0	0	0
OSBP2	0	0	0	0	1	0	0	0	0	0	0
OSBPL1A	1	0	0	0	0	0	0	0	0	0	0
OSCAR	0	0	0	0	0	0	1	0	0	0	0
OSGIN1	0	0	0	0	0	1	0	0	0	0	0
OSM	0	0	0	0	0	0	1	0	0	0	0
OTUB2	0	0	0	0	0	0	0	1	0	0	0
OTUD3	0	0	0	0	0	0	0	0	0	0	1
OTUD7A	0	0	0	0	0	0	0	0	0	1	0
OXER1	0	0	0	0	0	0	1	0	0	0	0
OXLD1	0	0	0	0	0	1	0	0	0	0	0
OXTR	0	0	1	0	0	0	0	0	0	0	0
P2RY1	0	0	1	0	0	0	0	0	0	0	0
P2RY11	0	0	0	0	0	1	0	0	0	0	0
P2RY13	0	0	0	0	0	0	1	0	0	0	0
P2RY14	0	0	0	0	0	0	1	0	0	0	0
P2RY6	0	0	1	1	0	0	1	1	1	0	0
P3H2	0	1	0	0	0	0	1	0	0	0	1
P3H4	0	0	0	0	0	1	0	0	0	0	0
P4HA3	0	0	1	0	0	0	0	0	0	0	0
PABIR1	0	0	1	0	0	0	0	0	0	0	0
PABPC1P4	0	0	1	0	0	0	0	0	0	0	0
PABPC4L	0	0	0	0	0	0	0	0	1	0	0
PABPC5	0	0	1	0	0	0	0	0	0	0	0
PACC1	0	1	0	1	0	0	0	1	1	1	1
PACSIN1	0	0	0	0	0	1	0	0	0	0	0
PAFAH1B3	0	0	0	0	0	1	0	0	0	0	0
PAGR1	0	0	0	0	0	1	0	0	0	0	0
PAIP2B	1	0	0	0	0	0	0	0	0	0	0
PAK4	0	0	0	0	0	0	0	1	0	0	0
PALM	0	0	0	0	0	1	0	0	0	0	0
PALMD	0	0	1	0	0	0	0	0	0	0	0
PALS2	0	1	0	1	0	0	1	0	0	0	1
PAM16	0	0	0	0	0	1	0	0	0	0	0
PAMR1	0	0	1	0	0	0	0	0	0	0	0
PAN3-AS1	0	0	0	0	0	0	0	0	0	0	1
PANX2	0	0	0	0	0	0	0	1	0	0	0
PAPLN	0	0	0	0	0	0	1	0	0	0	0
PAPLN-AS1	0	0	1	0	0	0	0	0	0	0	0
PAQR4	0	0	0	0	0	0	0	1	0	0	0
PAQR5	0	0	0	0	1	0	0	0	0	0	0
PAQR6	0	0	0	0	0	0	0	0	0	0	1
PARD3B	0	0	1	0	0	0	0	0	0	0	0
PARD6A	0	0	0	0	1	0	0	0	0	0	0
PARD6B	0	0	0	0	1	0	0	0	0	0	0
PARM1	0	0	1	0	0	0	0	0	0	0	0
PARPBP	0	0	0	0	0	0	0	1	0	0	0
[truncated: 1,157 more rows]

## Sheet: THCA
id	m0	m1	m2	m3	m4	m5	m6	m7	m8	m9
A1BG-AS1	1	1	0	1	0	1	1	0	0	1
A2M-AS1	0	0	1	0	0	0	0	0	0	0
AAK1	1	0	1	0	1	0	0	0	0	0
AASS	0	0	0	0	1	0	0	0	1	0
ABCA10	0	1	1	1	1	0	1	0	1	0
ABCA13	0	0	0	0	0	0	1	0	0	0
ABCA4	0	1	1	1	0	1	1	0	1	1
ABCA6	0	0	1	0	0	0	0	0	1	1
ABCA8	0	1	0	1	0	0	0	0	0	0
ABCB9	1	1	1	0	0	1	0	0	0	1
ABCC3	1	0	0	1	0	0	0	0	0	0
ABCC4	0	0	1	0	1	0	0	0	0	0
ABCC6	1	0	0	0	0	0	1	0	0	0
ABCC6P2	1	0	1	1	0	0	1	0	0	1
ABCC8	1	0	0	0	1	0	1	0	0	0
ABCC9	1	1	1	0	0	0	0	0	1	0
ABCG4	1	0	0	0	0	0	1	1	0	0
ABHD1	0	0	0	0	1	0	0	0	0	0
ABHD11-AS1	1	0	1	1	0	1	0	1	1	0
ABHD17C	1	1	1	1	0	0	0	0	0	1
ABI3BP	1	1	1	0	0	0	0	0	1	0
ABLIM3	1	0	1	0	0	0	1	0	1	0
ABR	1	0	0	0	0	1	0	1	1	0
ABTB2	1	1	1	1	0	1	1	1	1	1
ACACB	0	0	0	0	1	0	0	0	0	0
ACADSB	1	0	0	0	1	0	0	1	0	0
ACAP1	1	1	1	1	0	0	0	0	1	0
ACHE	1	1	0	0	1	0	0	0	0	0
ACKR2	1	0	1	0	0	0	0	0	0	0
ACOT11	1	0	0	0	1	0	0	0	0	0
ACOT7	0	1	1	0	0	1	0	0	1	1
ACP3	1	0	1	0	0	0	0	0	0	0
ACP5	0	1	0	1	0	0	0	0	0	1
ACSM1	0	0	0	0	1	0	0	0	0	0
ACSM5	0	0	1	0	0	0	0	0	0	0
ACTN1	1	1	1	1	0	1	0	0	0	0
ACTRT3	0	1	0	0	0	0	0	0	0	0
ADAL	1	0	0	0	1	0	0	0	0	0
ADAM11	0	0	1	0	0	0	1	0	0	0
ADAM12	0	1	1	0	0	1	1	0	0	0
ADAM22	1	0	1	0	1	0	0	0	1	0
ADAM33	1	0	0	0	1	0	1	0	1	0
ADAMTS10	0	1	1	1	1	1	1	0	1	1
ADAMTS12	1	1	0	0	0	0	0	0	1	0
ADAMTS17	0	1	1	0	0	1	1	0	1	1
ADAMTS2	1	1	1	0	0	1	1	0	1	1
ADAMTS3	0	0	0	0	1	0	1	0	0	0
ADAMTS5	1	0	1	0	0	0	0	0	1	0
ADAMTS6	0	1	1	0	0	1	1	0	1	1
ADAMTS7	1	1	1	1	1	0	1	0	1	1
ADAMTS9	0	1	1	0	0	0	0	0	0	0
ADAMTS9-AS1	0	0	0	0	0	0	0	0	0	1
ADAMTS9-AS2	0	0	0	1	0	1	1	1	0	1
ADAMTSL4-AS1	0	0	0	0	1	0	0	0	1	0
ADAP2	0	1	0	0	0	0	0	0	0	0
ADAT2	0	0	1	0	0	0	0	0	0	0
ADCY10P1	0	0	1	1	1	0	0	0	0	0
ADD3-AS1	0	0	1	1	1	0	0	0	0	0
ADGRA3	0	0	0	0	1	0	0	0	0	0
ADGRE2	0	0	0	1	0	0	1	0	0	1
ADGRF3	1	0	1	0	0	0	1	0	0	0
ADGRG2	0	1	0	1	1	1	1	0	1	1
ADGRV1	0	0	0	0	1	0	0	0	0	0
ADHFE1	0	0	0	0	1	0	1	0	0	0
ADIRF-AS1	0	0	1	0	0	0	0	0	0	0
ADM	1	0	1	1	0	0	0	1	1	1
ADM2	1	0	1	0	1	0	0	0	0	0
ADORA1	0	1	1	1	0	1	0	1	0	1
ADPRHL1	0	0	1	1	1	0	0	0	1	0
ADRA1B	0	1	1	1	0	1	1	0	0	1
ADRA2A	1	1	1	1	0	0	0	0	1	1
ADRA2C	0	0	1	1	0	1	1	0	0	1
ADRB2	1	1	0	1	0	1	0	0	1	0
ADTRP	0	1	1	1	0	1	1	0	1	1
AFF2	1	0	1	1	0	1	1	0	1	1
AGBL2	0	1	1	1	1	0	1	0	0	0
AGBL4	0	0	0	0	1	0	0	0	0	0
AGPAT4	0	1	1	0	1	0	1	0	0	0
AGT	0	1	1	1	0	0	1	0	0	1
AHI1-DT	0	0	0	1	1	0	0	0	0	0
AHNAK2	1	1	1	0	0	1	0	1	0	0
AIF1L	0	0	0	0	1	0	0	0	0	0
AJAP1	0	0	0	0	1	0	0	0	0	0
AK1	0	1	0	0	0	0	0	0	0	0
AK5	0	1	1	0	0	0	1	0	0	0
AK7	0	0	0	0	0	0	1	0	0	0
AKAP12	0	0	1	0	0	0	1	0	0	0
AKAP3	0	0	0	0	1	0	0	0	0	0
AKAP6	1	0	0	0	0	0	0	1	0	0
AKR1C1	1	0	1	0	1	0	0	0	1	0
AKR1C2	0	0	0	0	0	0	0	0	1	0
AKR1C3	1	1	1	1	1	0	0	0	1	0
AKR1E2	0	0	1	0	1	0	0	0	1	0
AKR7A3	0	0	1	1	1	0	1	0	0	0
ALDH1A1	0	0	1	0	1	0	0	0	0	0
ALDH1A3	0	0	1	0	0	1	0	0	0	1
ALDH1A3-AS1	1	1	0	1	0	0	0	0	0	0
ALDH1B1	1	0	1	0	1	0	0	0	1	0
ALDH1L2	0	0	0	0	0	0	0	0	1	0
ALDH3B1	1	0	1	0	0	0	0	0	0	0
ALDH4A1	0	0	0	0	1	0	0	0	0	0
ALDOC	0	1	1	1	0	1	0	0	0	1
ALG11	1	0	1	0	1	0	1	1	1	0
ALG1L6P	0	0	1	1	0	0	0	1	0	1
ALOX5	0	1	0	0	0	0	0	0	1	0
ALPL	0	1	1	0	0	0	0	0	1	1
AMIGO2	0	1	0	0	0	0	1	0	0	0
AMOT	1	1	1	0	0	0	0	1	0	0
ANGPT4	0	0	0	0	1	0	0	0	0	0
ANGPTL1	0	0	1	0	1	0	1	0	0	0
ANGPTL4	0	0	0	1	0	0	0	0	0	0
ANK1	0	1	0	1	0	0	0	0	1	0
ANK2	0	0	1	0	1	0	0	0	1	0
ANK3	1	0	0	0	0	0	1	0	0	0
ANKDD1A	0	0	0	1	1	0	0	0	1	0
ANKDD1B	1	0	1	1	0	0	1	0	1	1
ANKRD24	0	0	1	0	0	0	0	0	0	0
ANKRD29	1	0	1	1	0	0	0	0	1	0
ANKRD33B	1	0	1	0	0	0	1	0	1	0
ANKRD35	1	1	0	0	0	0	0	0	1	1
ANKRD36C	1	0	0	0	0	0	1	0	1	0
ANKRD37	0	0	1	0	0	0	1	0	0	0
ANKRD42-DT	0	0	0	0	1	0	1	0	0	0
ANKRD46	0	0	0	0	0	0	1	0	0	0
ANKRD53	0	1	0	1	1	0	0	0	0	0
ANKRD65	0	0	1	1	0	1	1	0	1	0
ANKRD9	0	0	0	0	1	0	0	0	0	0
ANKS1B	0	0	0	0	0	0	0	0	1	0
ANLN	1	0	1	0	0	1	0	0	0	0
ANO5	0	0	0	0	0	0	0	0	1	0
ANO7	0	1	1	1	0	1	1	0	1	1
ANPEP	1	1	1	1	0	0	0	0	1	0
ANTXR1	0	1	0	0	0	0	1	0	1	0
AOAH	1	1	1	1	0	0	0	0	1	0
AP1S3	1	0	1	0	1	0	1	0	1	0
APBA1	0	1	1	1	1	0	0	0	0	0
APBA2	1	1	1	0	0	0	0	0	0	0
APLN	0	0	0	0	0	0	1	0	0	0
APLNR	1	0	1	1	0	0	1	0	1	1
APLP1	1	0	0	0	1	0	0	1	0	0
APOBEC3H	1	1	1	0	0	0	0	0	0	0
APOC1	0	1	1	1	0	1	0	0	1	1
APOD	0	1	0	0	0	0	0	0	0	0
APOE	0	0	0	1	0	0	0	0	0	0
APOM	0	0	0	1	1	0	0	0	0	0
AQP3	1	1	1	1	0	1	1	0	1	1
AR	0	0	0	0	0	0	1	0	0	0
ARAP2	0	0	0	0	0	0	1	0	0	0
ARAP3	0	0	0	0	0	0	1	0	1	0
ARHGAP15	1	0	0	1	0	0	0	0	0	0
ARHGAP19	0	1	1	1	0	1	1	0	1	1
ARHGAP20	0	1	0	0	1	0	1	0	1	0
ARHGAP23	0	0	0	0	0	1	0	0	0	0
ARHGAP24	0	0	1	0	0	0	0	0	0	0
ARHGAP28	1	0	0	0	1	0	1	0	1	0
ARHGAP6	0	0	0	0	1	0	0	0	0	0
ARHGAP8	1	0	1	0	1	0	1	0	1	0
ARHGEF17-AS1	0	1	0	1	1	0	0	0	0	0
ARHGEF2-AS2	0	0	0	0	0	1	1	0	0	0
ARHGEF26-AS1	1	0	0	0	0	0	0	0	0	0
ARHGEF28	1	0	0	0	0	0	0	0	0	0
ARHGEF33	0	0	1	1	1	0	0	0	0	0
ARHGEF34P	0	0	1	0	0	0	1	0	0	0
ARHGEF37	0	0	0	0	1	0	0	0	0	0
ARHGEF38	0	0	0	0	0	0	1	0	0	0
ARHGEF4	0	0	0	0	0	0	1	0	0	0
ARL17A	0	0	1	0	1	0	1	0	0	0
ARL17B	1	0	1	0	1	0	0	0	0	0
ARL4A	0	0	0	1	0	0	0	0	0	0
ARMC2	0	0	1	0	1	0	1	0	1	0
ARMH1	0	1	0	1	0	0	0	0	0	0
ARMH4	1	0	0	0	1	0	1	0	1	0
ARNILA	0	0	1	1	1	0	0	0	0	0
ARNTL	0	1	1	0	0	0	1	0	1	1
ARNTL2	1	1	0	0	0	1	0	1	1	1
ARRDC3-AS1	1	0	1	0	0	0	1	0	0	0
ARSJ	1	0	1	0	0	0	1	1	0	0
ARSK	1	0	1	0	1	0	1	0	1	0
ARTN	0	1	0	1	0	0	0	0	0	1
ASAH1-AS1	0	0	0	0	0	0	1	0	0	0
ASB12	0	0	0	1	1	0	0	0	0	1
ASB14	0	0	1	1	0	0	0	0	0	0
ASB2	0	0	0	0	0	0	0	0	0	1
ASCL2	0	1	0	0	0	0	0	0	0	0
ASF1B	1	1	1	1	0	0	1	0	1	1
ASGR1	0	0	0	0	1	0	0	0	0	0
ASIC1	1	0	0	0	0	0	1	0	1	0
ASPA	1	0	1	1	0	0	1	0	1	0
ASPG	0	0	1	0	0	0	0	0	0	0
ASPH	1	0	1	0	0	0	0	0	0	0
ASPRV1	0	0	1	1	1	0	0	0	0	0
ATF3	1	1	0	1	1	0	1	0	1	0
ATF7IP2	1	0	1	0	1	0	0	0	0	0
ATG9B	1	0	1	0	0	0	0	0	0	1
ATP10A	0	1	0	1	0	1	1	0	0	1
ATP10D	0	1	0	0	0	0	0	0	0	0
ATP11A	1	1	0	0	0	0	0	0	1	0
ATP13A3-DT	0	1	1	0	1	0	0	0	0	1
ATP1A1-AS1	0	0	0	0	1	0	0	0	0	0
ATP2C2	0	0	1	0	0	0	0	0	0	0
ATP6V0E2-AS1	0	0	1	0	1	0	0	0	0	0
ATP6V1FNB	0	1	1	0	0	1	1	0	1	1
ATP7B	1	0	0	0	0	0	0	0	0	0
ATP8A2	0	1	0	1	0	0	1	0	1	1
ATP8B4	1	1	1	1	0	1	1	0	1	1
ATP8B5P	0	0	0	1	1	0	0	0	0	0
ATXN1-AS1	0	0	1	0	0	0	0	0	1	0
ATXN7L1	0	0	0	0	0	0	1	0	1	0
AUTS2	1	1	0	1	0	0	0	0	0	1
AVPR1A	0	0	1	0	1	0	0	0	1	0
AXIN2	0	1	1	0	1	0	0	0	0	0
B3GALNT2	0	0	1	0	0	0	0	0	0	0
B3GAT1	1	0	0	1	0	1	1	1	0	1
B3GAT1-DT	0	0	0	0	0	0	1	0	0	0
B3GNT7	1	1	1	0	0	1	1	0	0	1
B3GNT8	0	1	0	1	0	0	1	0	1	0
B4GALNT3	1	0	1	0	0	0	0	0	0	0
B4GALT1-AS1	0	0	0	1	0	0	0	0	0	0
B4GALT6	1	1	1	0	0	1	0	0	0	0
BAALC	1	1	0	1	0	1	1	0	1	1
BAG2	1	1	1	0	0	0	1	0	1	1
BAIAP3	0	1	1	1	0	1	1	0	1	1
BANK1	1	0	1	0	0	0	0	0	0	0
BATF3	1	0	0	1	0	0	1	0	0	1
BBC3	0	1	1	1	0	0	1	0	1	1
BBLN	0	1	0	0	0	1	0	0	1	0
BBOF1	0	0	0	0	1	0	0	0	0	0
BBOX1	1	1	1	0	0	0	0	1	1	0
BCAT1	1	1	1	1	0	1	1	0	1	0
BCDIN3D-AS1	0	0	0	0	1	0	0	0	0	0
BCL11B	0	1	1	0	1	0	0	0	1	0
BCL2	1	0	1	0	1	0	1	0	0	0
BCL2L11	1	0	0	0	1	0	0	0	0	0
BCO2	1	0	0	0	1	0	0	0	0	0
BCRP3	0	1	0	1	1	1	1	0	1	0
BDKRB2	0	0	1	1	1	0	1	0	1	0
BEAN1	0	0	0	0	0	1	0	0	0	0
BEX1	0	0	0	1	0	0	0	0	0	0
BFSP1	0	0	0	0	1	0	1	0	0	0
BHMT2	0	0	0	0	1	0	0	0	0	0
BICC1	1	0	0	0	0	0	0	0	1	0
BICD1	1	0	0	1	1	0	1	0	1	1
BICDL2	1	0	0	1	0	1	1	1	1	1
BID	0	1	0	1	0	0	1	0	0	1
BLACAT1	0	1	1	1	0	1	0	0	0	0
BMERB1	0	0	0	1	0	1	1	0	1	1
BMP1	0	0	0	1	0	0	0	0	0	0
BMP2	0	0	1	0	1	0	1	0	1	0
BMP8A	0	0	1	0	0	0	0	0	0	0
BMP8B	1	0	0	0	1	0	0	0	0	0
BMPER	0	0	1	1	0	0	0	0	0	0
BMS1P4	0	0	1	0	1	0	1	0	0	0
BNIPL	0	1	0	1	0	0	0	0	1	0
BORA	1	1	1	0	1	0	1	0	1	0
BRCA2	0	1	0	0	0	0	0	0	0	1
BRINP1	0	1	0	1	0	1	1	0	1	1
BRIP1	0	1	1	0	0	1	0	1	1	0
BRME1	1	1	1	1	0	1	1	0	1	1
BRSK1	0	0	1	0	0	0	0	0	1	1
BRWD1-AS2	0	0	0	0	1	0	0	0	0	0
BSN	1	0	0	1	1	1	1	1	1	0
BST1	0	0	0	0	0	0	0	0	1	0
BTBD11	0	0	0	0	1	0	0	0	0	0
BTF3-DT	0	0	0	0	1	0	0	0	0	0
BUB1	0	1	0	0	0	1	0	1	0	1
BUB1B	0	1	1	1	0	0	0	1	1	0
BVES	0	0	0	0	0	0	0	0	1	0
C10orf143	0	0	1	0	0	0	0	0	0	0
C10orf55	1	0	1	0	0	1	0	0	1	1
C10orf95	0	1	0	0	0	0	0	0	0	0
C11orf65	0	0	0	0	1	0	0	0	0	0
C11orf80	1	0	1	1	0	1	1	1	1	1
C12orf60	0	0	1	0	1	0	0	0	0	0
C14orf132	0	1	1	0	1	0	1	0	1	0
C15orf48	1	0	1	0	0	0	0	1	0	1
C15orf62	0	0	0	1	0	0	0	0	0	0
C16orf46	0	0	0	0	1	0	0	0	0	0
C16orf54	1	1	1	1	0	1	0	0	1	0
C16orf86	0	0	1	0	1	0	0	0	0	0
C17orf107	1	0	0	1	0	1	1	0	0	0
C19orf33	0	1	0	0	0	0	0	0	0	0
C19orf71	0	0	1	0	1	0	0	0	0	0
C1orf116	0	0	1	0	0	0	0	0	0	0
C1orf216	1	1	1	1	0	1	0	0	1	1
C1orf226	1	1	0	1	0	1	1	1	1	1
C1orf74	0	1	0	0	1	0	1	0	1	0
C1QL4	0	0	0	1	1	0	0	0	0	0
C1QTNF12	0	0	1	1	0	0	0	0	0	1
C1QTNF2	0	1	1	1	0	0	0	0	1	1
C1QTNF3	0	0	1	0	0	0	0	0	0	0
C1QTNF6	1	1	1	0	0	1	0	0	0	0
C1QTNF7	0	1	1	1	0	1	1	0	1	1
C1R	1	1	1	1	0	1	0	0	1	1
C1S	1	0	0	0	0	0	0	0	1	1
C2	0	1	0	0	0	0	0	0	0	0
C21orf62-AS1	0	0	0	0	1	0	0	0	0	0
C2CD4C	0	0	1	1	0	0	1	0	0	0
C2orf49-DT	0	0	0	0	0	0	1	0	0	0
C2orf88	1	0	1	0	1	0	0	0	0	0
C3orf52	1	0	1	0	1	0	1	0	1	0
C3orf80	0	1	1	1	0	1	1	0	0	0
C4orf19	0	0	0	0	1	0	0	0	1	0
C4orf47	0	0	0	1	1	0	0	0	0	0
C4orf48	1	1	0	1	0	0	0	0	0	1
C5AR2	0	1	0	0	0	0	0	0	0	0
C5orf63	0	0	0	0	1	0	1	0	0	0
C6orf163	0	0	1	0	1	0	1	0	0	0
C7	1	1	1	1	0	1	0	0	1	1
C7orf61	0	0	1	0	0	0	0	0	0	1
C8orf48	0	0	0	0	1	0	0	0	0	0
C9orf43	0	0	1	0	0	0	0	0	0	0
CA12	0	0	0	0	0	0	1	0	0	0
CA13	0	0	0	0	0	0	0	1	0	0
CA2	0	0	0	1	1	0	0	0	0	0
CAB39L	0	0	1	1	1	0	0	0	0	0
CABLES1	0	0	0	0	1	0	1	0	0	0
CABP1	0	0	1	1	1	0	0	0	0	1
CABYR	1	0	1	1	1	1	0	0	1	0
CACNA1C	1	1	1	1	1	0	1	0	1	1
CACNA1D	1	0	0	0	1	0	0	1	0	0
CACNA1H	0	0	0	1	1	0	0	0	0	0
CACNA1I	0	0	1	0	1	0	0	0	0	0
CACNA2D1	0	0	1	0	1	0	1	0	1	0
CACNA2D3	0	0	1	0	1	0	1	0	0	0
CACNA2D4	1	1	1	0	0	0	0	0	1	0
CACNB1	0	1	0	0	0	0	1	0	0	0
CACNB4	0	0	0	0	1	0	0	0	0	0
CAMK1D	0	0	0	0	1	0	0	0	0	0
CAMK2N1	1	1	1	0	0	1	1	0	1	1
CAMK4	0	0	0	1	0	0	0	0	0	0
CAPN11	1	1	1	1	0	0	0	0	1	1
CAPN12	0	1	0	0	0	0	1	0	1	1
CAPS2	0	0	0	0	1	0	0	0	0	0
CARD14	0	0	1	0	1	0	1	0	1	0
CARD9	1	1	1	1	0	1	0	0	1	1
CARMIL2	1	1	1	0	0	0	0	0	1	0
CARMIL3	0	0	1	0	1	0	1	0	1	0
CARNS1	0	0	0	1	0	0	0	0	0	1
CASC15	1	1	1	1	0	1	1	0	1	0
CASC2	0	0	0	0	1	0	0	0	0	0
CASP4LP	0	0	0	1	0	0	0	0	0	0
CASQ2	0	0	0	1	1	0	1	0	0	0
CASTOR2	1	1	0	1	0	1	0	1	0	0
CASTOR3	0	0	1	0	0	0	0	0	0	0
CASZ1	1	0	0	0	0	0	0	0	0	0
CATIP	0	0	0	1	0	0	0	0	0	0
CATSPER1	0	1	0	1	0	0	0	0	0	1
CATSPER2P1	1	0	0	0	0	0	0	0	0	0
CATSPERE	0	0	0	0	1	0	1	0	0	0
CAVIN2	0	0	0	1	0	0	0	0	0	0
CBARP	1	1	0	1	0	1	0	0	1	1
CBR3	1	0	0	1	0	0	0	0	1	1
CBX2	0	0	0	1	1	0	0	0	1	0
CCDC110	0	0	1	0	1	0	0	0	0	0
CCDC117	1	1	1	0	0	0	0	0	1	0
CCDC121	0	0	0	0	1	0	0	0	0	0
CCDC126	1	0	0	0	0	0	1	0	1	0
CCDC13	0	0	0	0	1	0	0	0	0	0
CCDC136	1	1	1	0	1	0	1	0	1	0
CCDC138	1	0	0	0	1	0	1	0	1	0
CCDC146	0	0	1	0	1	0	0	0	0	0
CCDC148	0	1	1	0	0	1	0	0	0	1
CCDC15	1	0	0	0	0	0	0	0	1	0
CCDC152	0	1	1	0	1	0	0	0	1	0
CCDC163	0	0	1	1	1	0	0	0	0	0
CCDC170	1	0	0	0	1	0	0	0	0	0
CCDC171	0	0	0	0	0	1	0	0	0	0
CCDC180	0	0	1	1	1	0	1	0	0	0
CCDC181	0	1	0	1	0	0	0	0	0	0
CCDC183-AS1	1	0	0	0	1	0	0	1	0	0
CCDC184	0	1	1	1	1	0	0	0	1	1
CCDC28A-AS1	0	0	0	0	0	0	1	0	0	0
CCDC30	0	0	0	0	1	0	0	0	0	0
CCDC40	0	0	0	0	1	0	1	0	0	0
CCDC65	0	0	1	1	1	0	0	0	0	0
CCDC68	1	0	0	0	1	0	1	0	0	0
CCDC74A	0	1	0	0	0	0	0	0	0	0
CCDC74B	0	0	0	1	0	0	0	0	0	0
CCDC78	1	0	1	1	0	0	1	0	0	1
CCDC81	0	0	1	1	0	0	1	0	0	0
CCDC87	0	0	0	0	1	0	0	0	0	0
CCDC88C	1	1	1	1	0	1	0	0	1	1
CCDC96	0	0	1	1	0	0	0	0	0	1
CCDC9B	0	0	1	0	1	0	0	0	0	0
CCL14	0	0	1	1	1	0	0	0	0	0
CCL2	0	1	1	0	0	0	0	0	0	1
CCL28	0	0	1	0	1	0	0	0	0	0
CCL4	0	0	1	1	0	0	0	0	0	0
CCM2	1	1	1	1	0	1	1	0	0	1
CCN3	0	0	0	0	0	1	0	0	1	0
CCNB3	1	0	0	0	1	0	1	0	1	0
CCND1	1	1	1	1	0	0	1	1	1	1
CCNI2	0	1	1	1	0	0	0	0	0	1
CCNO-DT	0	0	0	0	1	0	0	0	0	0
CCNP	1	0	0	1	1	0	1	0	1	0
CCP110	1	0	1	0	1	0	1	0	1	0
CCR1	0	0	0	0	0	0	0	0	1	1
CCR10	0	0	1	0	0	0	0	0	1	0
CCR7	1	0	0	0	0	0	0	0	1	0
CCSER1	0	0	1	0	0	0	0	1	0	0
CCT6B	0	0	0	0	1	0	0	0	0	0
CCT8P1	1	1	1	1	0	0	1	0	0	1
CD109	1	1	1	1	0	1	0	0	1	0
CD163L1	0	0	0	0	0	0	0	0	1	0
CD226	0	0	0	1	0	0	0	0	0	0
CD247	0	0	0	0	0	0	0	0	1	0
CD276	0	1	1	1	0	1	1	0	1	1
CD300LF	0	1	1	1	0	1	0	0	1	1
CD302	0	0	0	0	0	0	0	0	1	0
CD33	1	0	0	0	0	0	0	0	1	0
CD36	0	0	1	0	0	0	0	0	0	0
CD38	0	1	1	1	0	0	0	0	0	0
CD3D	0	0	1	1	0	0	0	0	0	0
CD3E	1	1	1	1	0	1	0	0	0	0
CD3G	1	1	0	1	0	1	0	0	0	0
CD48	0	1	1	1	0	1	0	0	1	1
CD55	1	0	0	1	0	0	0	0	0	1
CD6	1	1	0	1	0	0	0	0	1	0
CD69	0	0	0	1	0	0	0	0	0	0
CD72	0	0	0	0	0	0	0	0	1	0
CD79A	1	1	1	0	0	0	0	0	1	0
CD8A	0	1	0	0	0	0	0	0	1	0
CD8B	1	0	0	1	0	0	1	0	0	0
CD96	1	1	1	0	0	1	0	0	0	0
CDA	0	0	0	0	0	0	0	0	1	0
CDADC1	0	0	1	0	0	0	0	0	0	0
CDC14B	1	0	0	0	1	0	0	0	0	0
CDC25A	0	0	0	0	1	0	1	0	0	0
CDC42BPG	1	1	0	0	0	1	0	1	1	0
CDC42EP1	0	0	0	0	0	0	0	0	0	1
CDC42EP2	0	0	0	0	1	0	0	0	0	0
CDC42EP3	0	0	0	1	0	0	1	0	1	1
CDC42EP5	1	1	0	0	0	1	0	0	0	0
CDC45	1	1	0	0	0	1	0	0	1	0
CDC6	1	0	0	0	0	0	0	0	0	0
CDH11	1	1	1	0	0	0	1	0	1	0
CDH13	0	1	0	0	0	0	1	0	1	0
CDH16	0	0	0	0	1	0	0	0	0	0
CDH2	0	0	0	1	1	0	1	0	0	1
CDH23	0	1	0	0	0	0	0	0	0	0
CDH24	1	1	1	1	0	1	1	0	1	1
CDH3	1	0	1	0	0	1	0	0	0	1
CDH4	0	0	1	0	0	1	0	0	0	0
CDH6	0	1	1	1	0	1	1	0	1	1
CDHR3	0	0	0	0	0	0	1	0	0	0
CDK13-DT	0	0	1	1	1	0	0	0	0	0
CDKL1	0	0	1	0	0	0	0	0	1	0
CDKN2A	1	0	1	1	0	1	1	1	1	1
CDKN2B	0	1	0	0	0	1	0	0	0	0
CDNF	0	0	0	0	1	0	0	0	0	0
CDON	0	0	0	0	1	0	0	0	0	0
CDR2L	1	1	0	0	0	1	1	0	1	1
CDT1	1	0	1	1	0	1	0	0	0	1
CEBPA-DT	0	0	0	0	1	0	0	0	0	0
CEBPB-AS1	0	0	0	0	1	0	0	0	0	0
CELF4	1	0	0	1	0	1	1	1	1	1
CENATAC-DT	1	0	1	0	1	0	1	0	0	0
CENPF	1	0	0	0	0	0	1	0	0	0
CENPJ	1	0	0	0	1	0	0	0	0	0
CENPK	1	1	1	0	0	1	1	1	1	0
CENPM	0	0	0	1	0	0	0	0	0	0
CENPU	1	1	1	0	0	0	1	1	1	0
CEP126	0	0	1	0	1	0	0	0	0	0
CEP152	0	0	0	0	0	0	0	0	1	0
CEP19	1	0	1	0	1	0	0	0	1	0
CEP43	0	0	1	1	0	0	1	0	0	0
CEP85L	1	0	1	1	1	0	1	0	1	0
CEROX1	1	0	1	1	0	1	0	1	1	0
CERS1	0	0	0	0	0	0	0	0	1	1
CES3	0	1	0	0	0	0	0	0	0	0
CFAP157	0	0	1	0	0	0	0	0	0	0
CFAP221	0	0	0	0	1	0	0	0	0	0
CFAP43	0	0	0	0	1	0	0	0	0	0
CFAP45	0	0	1	1	0	0	0	0	0	0
CFAP46	0	0	0	0	1	0	0	0	0	0
CFAP54	1	0	0	0	0	0	1	0	0	0
CFAP57	0	0	1	0	0	0	0	0	0	0
CFAP58	0	0	1	1	1	0	0	0	0	0
CFAP69	0	0	0	0	0	0	1	0	0	0
CFAP92	1	0	0	1	1	0	1	0	0	0
CFAP99	0	0	0	0	1	0	0	0	0	0
CFB	1	0	1	0	0	0	0	0	0	1
CFD	0	0	1	0	0	0	0	0	0	0
CFI	0	0	1	0	0	0	0	0	1	1
CGNL1	0	0	0	0	1	0	0	0	0	0
CHAD	0	0	1	0	1	0	0	0	0	1
CHAF1B	0	0	0	0	0	1	0	0	0	0
CHCHD2P6	0	0	0	0	1	0	0	0	0	0
CHD7	0	0	0	0	1	0	1	0	0	0
CHGB	0	1	1	0	0	1	0	1	1	1
CHIA	0	0	0	0	1	0	0	0	1	0
CHIT1	1	0	1	1	0	1	1	0	0	0
CHODL	0	0	0	1	0	1	0	0	1	0
CHP1P2	1	0	0	0	0	0	0	1	0	1
CHST11	1	1	1	1	1	0	1	0	1	1
CHST2	0	0	0	1	0	0	0	0	0	0
CHST6	1	1	0	0	0	0	0	0	1	1
CIART	1	0	0	0	0	0	0	1	1	0
CILP2	0	1	0	1	0	1	0	0	0	0
CIRBP-AS1	0	0	0	1	1	0	0	0	0	0
CIT	1	0	1	1	1	0	1	0	1	0
CITED1	1	1	0	0	0	1	0	1	0	1
CITED2	0	0	0	0	1	0	0	0	1	0
CKLF	1	0	1	0	0	0	0	0	0	0
CKLF-CMTM1	1	1	1	0	0	1	1	0	1	1
CKS2	0	0	0	0	0	0	1	1	1	1
CLCNKB	0	0	1	0	1	0	0	0	0	0
CLDN1	1	1	1	0	0	1	1	1	1	1
CLDN11	1	1	0	0	0	0	1	0	1	1
CLDN8	0	0	1	0	0	0	0	0	0	0
CLDN9	1	1	0	0	0	0	1	0	1	0
CLEC4E	0	0	0	0	0	0	0	0	1	0
CLEC7A	0	1	1	0	0	1	1	0	1	1
CLIP3	1	0	0	1	0	0	0	0	0	0
CLMN	0	0	1	0	1	0	0	0	0	0
CLMP	0	0	0	0	0	0	1	0	0	1
CLSTN2	1	1	1	0	0	0	0	0	1	0
CLTCL1	0	0	0	0	1	0	0	0	0	0
CLUL1	0	0	0	0	1	0	0	0	0	0
CMKLR1	0	0	1	0	0	0	0	0	0	0
CMTM3	0	1	1	1	0	1	1	0	1	1
CNBD2	0	0	0	0	1	0	0	0	0	0
CNFN	0	1	0	1	0	0	0	0	0	1
CNIH2	1	1	1	1	0	0	1	0	1	0
CNIH3	0	1	0	1	0	1	0	0	0	0
CNKSR3	1	1	1	1	1	0	1	0	1	0
CNTLN	1	1	1	0	1	0	1	0	1	0
CNTNAP1	0	1	1	1	0	1	1	0	1	1
CNTNAP2	1	0	0	0	0	0	1	0	0	0
COBL	0	0	1	0	1	0	0	0	0	0
COL13A1	0	1	1	1	0	0	1	0	1	1
COL17A1	1	1	1	0	1	0	1	0	1	1
COL1A1	1	0	0	1	0	0	1	0	0	0
COL23A1	0	0	1	0	1	0	0	0	0	0
COL27A1	0	0	1	0	1	0	1	0	1	0
COL28A1	0	1	1	1	1	0	1	0	0	0
COL4A6	1	0	1	0	0	0	0	0	0	0
COL5A1	1	1	1	1	0	1	1	0	1	1
COL5A3	1	1	1	1	1	0	1	0	1	1
COL7A1	0	0	0	1	0	0	0	0	0	0
COL8A1	1	1	0	0	0	1	0	0	0	1
COL8A2	0	1	1	0	0	0	0	0	1	1
COL9A2	0	1	1	1	1	0	1	0	1	1
COL9A3	0	0	0	0	1	0	0	0	0	0
COLCA1	0	0	0	0	0	0	0	1	0	0
COLCA2	0	0	1	1	0	0	0	0	0	0
COLEC11	0	0	0	1	1	0	0	0	0	0
COLEC12	1	0	0	1	0	0	0	0	1	0
COPZ2	0	0	0	0	1	0	0	0	0	0
CORO2A	1	1	1	0	0	1	1	0	1	1
CORO2B	0	0	1	0	1	0	0	0	0	0
COSMOC	1	0	0	0	0	0	0	0	1	1
COX4I2	0	0	0	1	0	0	0	0	0	0
CPEB3	0	0	0	0	1	0	0	0	0	0
CPEB4	0	0	0	0	1	0	0	0	0	0
CPED1	0	1	1	1	1	0	0	0	1	0
CPM	1	1	0	0	0	0	0	0	1	0
CPS1	0	0	0	1	1	0	0	0	1	0
CPT1B	1	1	1	1	0	0	0	0	1	0
CPT1C	0	0	1	1	0	1	1	0	1	1
CPXM1	0	0	1	0	1	0	1	0	0	1
CPXM2	1	1	0	1	0	0	1	0	1	0
CRABP2	0	1	1	1	0	1	0	0	0	0
CRACDL	1	0	0	0	0	0	0	0	0	0
CRACR2A	1	1	1	0	0	0	0	0	1	1
CRACR2B	1	1	1	1	0	0	1	0	1	1
CREB5	1	0	0	1	0	1	0	0	0	0
CRELD2	1	0	0	0	0	0	0	0	0	0
CRHBP	1	0	0	1	0	0	1	0	1	0
CRHR2	0	1	1	1	0	0	1	0	0	1
CRISPLD1	1	1	1	1	0	0	1	0	0	0
CRISPLD2	0	1	1	1	0	1	1	0	1	1
CRLF1	1	1	1	1	0	1	1	0	1	1
CRNDE	0	0	1	0	1	0	1	0	1	0
CRTAC1	1	0	0	0	1	0	0	0	0	0
CRTC3-AS1	0	0	0	0	1	0	1	0	0	0
CRYAB	0	0	1	0	0	0	0	0	0	0
CRYBB3	0	0	0	1	0	0	0	0	0	0
CRYBG2	1	1	1	0	0	1	1	1	1	1
CRYBG3	1	0	1	0	1	0	1	0	1	0
CSGALNACT1	0	0	1	0	1	0	1	0	0	0
CSGALNACT2-DT	0	0	1	1	0	0	0	0	1	1
CSMD2	0	1	0	0	0	0	0	0	0	0
CSPG4	0	1	0	1	1	0	1	0	1	0
CSPG4P10	1	0	0	0	1	0	0	0	1	0
CSPG5	1	1	1	0	0	0	0	1	1	0
CSPP1	0	0	0	0	1	0	1	0	1	0
CSRP2	1	1	1	0	1	0	1	0	1	0
CST6	0	1	1	1	0	1	1	0	1	0
CTH	0	0	1	0	0	0	0	0	0	0
CTHRC1	0	1	0	0	0	1	0	0	0	1
CTSC	0	0	1	0	0	0	0	0	0	0
CTSH	0	1	0	1	0	1	1	1	1	1
CTSS	1	1	1	1	0	1	1	1	1	0
CTSV	1	1	1	0	0	0	1	0	0	1
CTTNBP2	0	0	1	0	0	0	0	1	1	0
CTXN1	1	0	1	1	0	1	1	0	1	1
CTXND1	1	0	0	1	0	0	0	0	0	0
CUZD1	0	0	1	1	0	1	0	0	1	0
CX3CL1	1	0	0	0	0	1	0	0	1	1
CXCL12	1	1	1	1	0	0	0	0	1	1
CXCL14	0	0	0	0	0	1	0	0	0	1
CXCL8	0	1	0	1	0	1	0	0	0	1
CXXC4	0	0	0	0	1	0	0	0	0	0
CYB5RL	1	0	1	0	1	0	0	1	0	0
CYP17A1	0	0	0	0	1	0	0	0	0	0
CYP1A2	0	0	1	0	0	0	1	0	1	0
CYP1B1	0	0	0	0	0	0	0	0	0	1
CYP1B1-AS1	0	0	0	1	0	1	0	0	1	0
CYP27B1	0	0	1	0	0	0	0	0	0	0
CYP2S1	1	1	1	1	0	1	1	1	1	1
CYP2U1	1	0	0	0	0	0	1	0	0	0
CYP3A5	0	0	1	0	0	0	1	0	0	0
CYP46A1	0	0	0	0	1	0	0	0	0	0
CYP7B1	0	0	1	0	1	0	1	0	0	0
CYSLTR2	0	1	1	1	0	1	1	0	1	0
CYSRT1	1	1	1	0	0	1	0	0	0	1
CYTH3	0	0	1	0	1	0	0	0	1	0
CYTIP	0	0	0	0	0	1	0	0	0	0
CYTOR	1	1	0	0	0	1	1	0	1	0
DAAM2	0	0	0	0	1	0	0	0	1	0
DAAM2-AS1	0	0	1	0	0	0	1	0	0	0
DACT1	0	0	1	0	1	0	1	0	0	0
DAGLA	0	0	0	0	0	0	0	1	1	0
DAPK1	1	1	1	1	1	1	1	0	1	0
DAPK2	0	0	1	0	0	0	0	1	1	0
DARS1-AS1	1	0	1	0	1	0	0	0	0	0
DBH-AS1	1	1	1	1	1	0	0	0	1	1
DCAF17	1	0	0	0	1	0	0	0	0	0
DCDC1	0	0	1	0	1	0	0	0	0	0
DCHS2	1	1	1	0	0	1	0	1	1	1
DCLK1	0	1	1	1	0	1	1	0	1	1
DCN	0	1	1	0	0	1	0	0	0	0
DCST1-AS1	0	0	0	1	0	1	0	0	0	0
DCST2	0	1	1	1	0	0	1	0	0	1
DCUN1D3	1	1	1	1	0	0	0	0	0	1
DDB2	1	1	1	1	0	0	0	0	1	0
DDR2	0	1	0	1	0	1	0	0	0	1
DDTL	1	0	0	0	1	0	0	0	0	0
DDX19A-DT	0	0	0	0	1	0	1	0	0	0
DENND2A	1	1	1	0	1	0	0	0	1	1
DENND6A	0	0	1	0	1	0	1	0	0	0
DEPDC1B	1	0	1	0	0	1	1	1	1	0
DEPTOR	0	0	1	0	1	0	1	0	0	0
DGCR5	1	0	0	1	1	0	1	0	0	0
DGCR6	0	0	1	1	0	1	0	0	1	1
DGKG	0	0	0	0	0	0	0	0	0	1
DGKH	1	1	1	1	0	0	1	1	1	1
DGKI	0	0	0	0	1	0	1	0	0	0
DGKZP1	1	1	1	1	1	1	1	0	1	1
DGUOK-AS1	0	0	0	1	0	0	1	0	0	1
DIAPH3	0	0	0	0	0	1	0	1	0	0
DICER1-AS1	0	0	0	0	1	0	0	0	0	0
DIO1	0	0	1	0	1	0	1	0	0	0
DIO2	1	0	0	0	0	0	0	0	0	0
DIP2C	0	0	0	0	0	0	0	1	0	0
DIRAS1	1	1	1	0	0	1	0	0	1	0
DIRAS3	0	0	1	1	0	0	1	1	0	0
DISP2	1	0	0	0	0	0	1	0	0	0
DIXDC1	0	0	0	0	1	0	0	0	0	0
DLEC1	0	1	1	1	1	0	0	0	1	0
DLEU2	0	0	1	0	0	0	0	0	1	0
DLG1-AS1	0	0	0	0	1	0	0	0	0	0
DLG2	0	0	1	0	0	0	0	0	0	0
DLG4	0	1	0	1	0	1	1	1	0	1
DLGAP1-AS2	0	1	1	1	1	1	1	0	0	1
DLGAP4-AS1	0	0	0	1	1	0	1	0	0	0
DLK2	0	1	1	0	1	0	1	0	0	0
DLL4	0	0	0	1	1	0	1	0	0	0
DLX5	0	1	1	0	0	0	1	0	1	1
DMD	0	1	0	1	1	0	0	0	0	1
DMGDH	0	0	0	0	1	0	0	0	0	0
DMTF1-AS1	0	0	0	0	1	0	0	0	0	0
DNAAF1	0	0	1	0	0	0	0	0	0	0
DNAAF8	0	0	0	0	1	0	0	0	0	0
DNAH11	0	0	1	0	1	0	0	0	0	0
DNAH6	0	0	0	1	0	0	0	0	0	0
DNAH7	0	0	0	0	1	0	0	0	0	0
DNAH9	0	0	0	0	0	0	1	0	0	0
DNAI4	0	0	0	0	1	0	0	0	0	0
DNAI7	0	0	0	0	1	0	0	0	0	0
DNAJB4	0	0	0	0	1	0	0	0	0	0
DNAJC27	0	0	0	0	1	0	0	0	0	0
DNAJC27-AS1	0	0	0	0	1	0	0	0	0	0
DNAJC3-DT	0	0	0	0	1	0	0	0	0	0
DNAL1	0	0	0	0	1	0	1	0	0	0
DNALI1	0	0	0	0	1	0	0	0	0	0
DNASE1L2	0	0	0	1	0	0	0	0	0	0
DNASE1L3	0	0	1	0	1	0	0	0	0	0
DNHD1	0	0	1	0	0	0	0	0	0	0
DNM1	1	1	1	1	0	1	1	0	1	1
DNM1P35	0	0	0	1	1	0	1	1	0	0
DNM3	0	0	1	1	0	1	1	0	1	1
DOC2B	0	0	1	1	0	0	0	0	1	0
DOC2GP	0	0	1	0	0	0	0	0	0	0
DOCK8-AS1	1	0	0	0	1	0	0	0	0	0
DOCK9	1	1	0	1	0	1	1	1	1	0
DOCK9-DT	0	0	0	1	0	0	1	0	0	1
DOK5	1	0	1	0	0	0	0	1	1	0
DOK7	0	0	1	0	0	1	0	0	0	0
DPH6-DT	0	0	0	0	1	0	0	0	0	0
DPP4	0	0	0	0	0	0	0	1	0	0
DPY19L1	1	0	0	0	0	1	0	0	1	0
DPY19L2	0	0	0	0	1	0	0	0	0	0
DPY19L2P2	1	0	1	0	0	0	0	0	0	0
DRAM1	1	1	1	1	0	1	1	0	1	1
DRAXIN	1	1	1	1	0	1	1	0	1	0
DRD4	0	0	0	1	0	0	0	0	0	0
DRICH1	0	0	0	0	0	1	0	0	0	0
DSC2	1	1	1	0	0	1	1	1	1	1
DSEL	0	1	0	0	1	0	1	0	1	0
DTL	1	1	1	0	0	1	1	1	1	0
DTX2P1-UPK3BP1-PMS2P11	1	1	1	0	1	0	0	0	1	0
DTX4	1	1	1	1	0	1	1	1	1	1
DUBR	0	0	1	0	0	0	0	0	0	0
DUSP15	1	0	0	0	1	0	0	0	0	0
DUSP19	0	0	0	0	1	0	0	0	0	0
DUSP4	1	1	1	0	0	1	1	0	1	1
DUSP5	1	1	1	0	0	1	1	1	0	1
DUSP6	0	0	0	0	0	0	1	0	1	0
DYNC1I1	0	0	0	0	1	0	0	0	1	0
DYNC2H1	0	0	0	0	1	0	0	0	0	0
DYNLRB2	0	0	1	0	1	0	0	0	0	0
DYRK3	0	0	0	0	1	0	0	0	0	0
DYSF	0	0	1	1	1	0	1	0	0	0
DZANK1	0	0	0	0	1	0	0	0	0	0
DZIP1L	0	1	1	0	1	0	1	0	1	0
DZIP3	0	0	1	0	1	0	1	0	0	0
E2F1	1	0	1	0	0	0	1	1	1	0
EAF2	1	0	0	0	0	0	0	0	0	0
EBF4	0	0	0	0	1	0	0	0	0	0
EBI3	0	0	0	1	0	0	0	0	0	1
ECEL1	1	1	1	1	1	0	1	0	0	0
ECM1	0	0	0	0	0	0	0	0	1	0
ECM2	0	1	0	0	1	0	0	0	0	1
ECT2L	0	1	1	1	0	1	1	0	1	1
EDA2R	1	0	1	0	1	1	1	1	1	0
EDARADD	1	0	1	0	1	0	1	0	1	0
EDIL3	0	1	1	0	0	0	1	0	0	1
EDRF1-DT	0	0	0	0	1	0	0	0	0	0
EEF1A2	1	0	1	0	1	0	1	1	0	1
EFCAB12	0	0	0	0	1	0	0	0	0	0
EFCAB2	0	0	0	0	1	0	0	0	0	0
EFCAB6	0	0	0	0	1	0	0	0	0	0
EFEMP1	1	0	1	0	0	0	0	0	0	0
EFHC2	0	0	1	0	0	0	1	0	0	0
EFNA3	0	1	0	1	0	0	1	0	0	1
EFNA5	1	0	0	0	0	1	1	0	0	1
EFNB3	0	1	1	1	1	0	1	0	1	1
EFS	0	1	1	0	1	0	1	0	0	1
EGF	0	0	1	0	1	0	0	0	0	0
EGLN3	1	1	1	1	0	1	1	0	1	1
EGR2	0	0	1	1	1	0	1	0	1	0
EGR3	0	1	1	1	1	1	1	0	1	1
EHBP1L1	0	0	1	1	0	1	0	0	0	0
EIF1B-AS1	0	0	0	0	1	0	0	0	0	0
EIF5A2	1	0	0	0	1	0	0	0	0	0
ELAPOR1	0	0	0	0	1	0	0	0	0	0
ELAPOR2	1	0	1	0	1	0	0	0	0	0
ELF3	1	0	1	0	0	0	0	0	0	0
ELF4	1	1	1	1	0	1	1	0	1	1
ELFN1	1	1	0	0	0	0	0	0	1	0
ELL2	0	0	1	0	0	0	0	0	1	0
ELMO1	0	0	1	0	0	0	0	0	0	0
ELN-AS1	0	0	0	0	1	0	0	0	0	0
ELOVL2	0	1	1	0	0	0	0	0	0	0
ELOVL4	1	0	0	0	0	0	0	0	1	0
ELOVL6	1	1	1	1	0	1	0	0	0	0
EMILIN2	1	0	0	1	0	0	1	0	1	1
EML1	0	0	0	0	1	0	1	0	0	0
EML6	1	0	0	0	1	0	0	0	0	0
EMSY	1	0	1	0	1	0	1	0	1	0
ENC1	1	1	0	1	0	1	1	0	1	1
ENDOD1	1	1	1	1	0	1	1	1	1	1
ENKUR	0	0	0	0	1	0	1	0	0	0
ENO1-AS1	0	0	0	0	1	0	0	0	0	0
ENO4	0	0	1	0	1	0	0	0	0	0
ENOX1	1	0	0	0	0	0	0	0	0	0
ENPEP	1	0	0	0	1	0	1	0	0	0
ENPP1	1	0	1	0	0	0	0	1	0	0
ENPP3	1	0	0	0	1	0	0	0	0	0
ENTPD1	1	0	0	1	1	1	1	1	0	1
ENTPD2	0	1	0	0	0	0	1	0	1	0
ENTPD8	1	0	1	0	0	1	1	0	0	0
EPB41L2	0	0	0	1	0	0	0	0	1	0
EPB41L3	0	1	1	0	0	0	1	0	0	0
EPB41L5	0	0	0	0	0	0	1	0	0	0
EPHA2-AS1	0	0	0	0	0	0	1	0	0	1
EPHA3	0	1	1	0	0	0	0	0	0	1
EPHA4	1	1	1	1	0	1	1	1	1	1
EPHB1	1	0	1	0	1	0	0	1	0	0
EPHB3	0	1	0	0	0	0	1	0	1	1
EPHX4	1	0	0	0	0	1	0	0	0	1
EPM2A	1	0	0	0	1	0	0	0	0	0
EPM2A-DT	0	0	0	0	1	0	0	0	0	0
EPOP	1	1	1	1	0	1	1	0	1	1
EPPK1	0	0	0	0	0	1	0	0	0	0
EPS8	1	0	0	0	0	0	0	0	0	0
ERBB3	0	1	0	0	0	0	1	1	0	0
ERBB4	0	0	1	0	1	0	0	0	0	0
ERCC6L	0	0	1	0	0	0	0	0	0	1
ERCC6L2	0	0	0	0	1	0	0	0	1	0
ERFE	1	0	0	0	1	0	1	1	0	0
ERICD	0	1	1	0	0	0	1	0	0	0
ERICH6-AS1	0	0	0	0	0	0	1	0	0	0
ERO1B	1	0	0	0	0	0	1	0	0	0
ERP27	1	0	0	0	0	0	0	0	0	0
ERRFI1-DT	0	0	0	0	1	0	0	0	0	0
ERVK13-1	0	0	1	1	1	0	1	1	0	0
ERVMER34-1	1	0	1	0	1	0	1	0	1	0
ESAM-AS1	0	0	0	0	1	0	0	0	0	0
ESM1	0	0	0	0	0	0	1	0	0	0
ESR2	1	0	1	0	1	0	0	0	1	0
ESRRG	0	0	1	0	1	0	1	0	0	0
ETFBKMT	0	0	0	0	1	0	0	0	0	0
ETHE1	1	1	1	0	0	0	1	0	0	1
ETNK2	0	1	1	1	0	1	0	0	1	1
ETV1	0	1	1	1	1	0	1	0	1	1
ETV4	1	0	1	1	0	1	1	0	1	1
ETV5	0	0	0	1	0	0	0	0	0	0
ETV7	1	0	0	1	0	1	0	0	1	0
EVA1A	0	1	0	0	0	0	0	0	0	0
EVPL	1	0	1	1	0	1	0	0	1	1
EXTL1	0	1	1	0	1	1	1	0	0	1
EYA2	0	0	1	0	0	0	0	0	1	0
EZH2	1	1	0	1	0	1	0	0	1	0
F10	0	1	0	0	0	0	0	0	1	0
F12	1	0	1	0	0	0	1	0	0	1
F2R	0	1	0	0	0	0	1	0	0	1
F5	1	0	0	1	0	0	0	0	0	0
FA2H	1	0	0	0	0	0	0	0	0	0
FAAHP1	0	0	0	0	1	0	0	0	0	0
FAHD2A	0	0	0	0	1	0	0	0	0	0
FAHD2B	1	1	0	1	0	0	0	0	0	0
FAHD2CP	0	1	1	1	0	0	0	0	1	0
FAM107B	1	1	0	1	0	1	1	0	1	1
FAM110A	0	1	0	0	0	0	0	0	0	1
FAM111A-DT	1	0	0	0	0	1	0	1	1	1
FAM111B	0	1	0	0	0	0	0	0	0	0
FAM118A	1	0	1	1	0	0	1	0	1	0
FAM124A	0	0	1	0	0	0	0	0	0	0
FAM126A	1	1	1	0	1	1	1	0	1	1
FAM126B	1	0	1	0	0	0	1	0	0	0
FAM131C	1	0	0	0	1	0	0	0	0	0
FAM13C	1	0	0	0	1	0	0	0	1	0
FAM149A	1	0	1	0	0	0	1	1	1	0
FAM151A	1	0	1	0	0	0	0	0	1	0
FAM161A	0	0	0	0	1	0	0	1	0	0
FAM167A	0	0	0	0	1	0	0	0	0	0
FAM169A	1	0	1	0	1	0	1	0	1	0
FAM171A2	0	0	0	0	0	0	1	0	0	1
FAM171B	0	0	0	0	1	0	1	0	0	0
FAM182B	0	0	0	0	1	0	0	0	0	0
FAM186B	0	0	0	0	1	0	0	0	0	0
FAM20A	1	1	0	0	0	1	1	0	0	0
FAM218A	0	0	0	0	1	0	1	0	0	0
FAM227A	0	0	1	1	0	0	0	0	0	0
FAM234B	0	0	0	0	1	0	0	0	0	0
FAM24B	0	0	0	0	0	0	0	1	1	0
FAM3D	1	1	1	1	1	0	0	0	0	0
FAM43A	1	0	1	0	0	0	1	0	0	1
FAM53A	0	0	0	0	1	0	0	0	0	0
FAM71E1	1	0	0	1	0	0	1	1	0	1
FAM71F2	0	0	1	1	1	0	1	0	0	0
FAM78B	0	0	1	0	0	0	0	0	0	0
FAM86DP	1	0	1	1	0	0	1	0	0	1
FAM86JP	0	0	0	1	0	0	0	0	0	0
FAN1	0	0	0	0	0	0	0	1	0	0
FANCA	1	1	1	1	0	1	1	1	0	0
FANCI	1	0	0	0	0	1	0	0	0	0
FAP	0	0	1	0	0	0	1	0	1	0
FAR2P2	0	0	0	0	1	0	0	0	0	0
FARP2	0	0	0	0	0	0	1	0	0	0
FAT2	1	1	1	0	0	0	0	0	1	1
FAT4	0	0	1	0	0	0	0	0	1	0
FAXC	0	1	1	0	0	0	1	0	1	1
FAXDC2	0	0	0	0	1	0	0	0	0	0
FBLN1	0	0	0	0	0	0	0	0	0	1
FBLN2	1	1	0	1	0	1	1	0	1	1
FBLN5	0	1	0	1	1	1	1	0	1	0
FBLN7	1	0	0	0	1	0	1	0	1	0
FBN3	1	1	1	1	1	0	1	0	1	1
FBXL18	0	0	0	0	0	0	1	0	1	0
FBXO15	0	0	0	0	1	0	0	0	0	0
FBXO2	0	1	1	0	0	0	0	0	1	1
FBXO27	1	0	1	0	0	0	0	0	1	0
FBXO30	0	0	0	0	1	0	0	0	0	0
FBXO36	1	0	0	0	0	0	0	0	0	0
FBXO41	0	1	0	0	0	0	0	0	0	0
FBXO48	0	0	1	0	0	0	1	0	0	0
FCGBP	0	0	0	0	1	0	0	0	0	0
FCGR2A	0	1	0	0	0	1	0	0	1	1
FCGR3A	1	0	1	1	0	1	0	0	1	1
FCHO1	0	0	0	0	0	0	0	0	1	0
FCMR	1	1	1	1	0	1	0	0	1	0
FCN1	0	0	1	0	0	0	0	0	0	0
FCN3	1	0	1	1	0	0	0	0	0	0
FCRLB	1	1	1	0	0	1	1	0	1	1
FER1L4	1	0	1	0	0	0	0	0	1	0
FERMT1	1	0	1	0	1	0	0	0	1	0
FEZ1	0	1	0	1	0	0	0	0	0	1
FGD2	0	0	1	0	0	0	0	0	1	0
FGF1	0	0	1	0	0	0	0	0	0	0
FGF13	1	0	0	0	1	0	0	1	0	0
FGF14-AS2	0	0	1	1	0	0	0	0	0	0
FGF2	0	0	0	0	0	1	0	1	1	1
FGFBP3	0	0	0	0	0	0	1	0	0	0
FGFR2	0	0	0	0	0	0	1	0	0	0
FGFR3	0	0	0	0	1	0	0	0	0	0
FGFR4	0	0	0	0	1	0	0	0	0	0
FGL2	1	1	1	1	0	1	0	0	1	1
FHDC1	0	0	1	0	1	0	0	0	0	0
FHL1	0	0	0	0	1	0	0	0	0	0
FHL2	0	0	1	0	0	0	0	0	0	0
FHL3	0	0	1	0	0	1	0	0	1	1
FHOD1	0	1	0	1	0	0	0	0	1	1
FHOD3	1	0	0	0	1	0	0	0	0	0
FJX1	1	1	0	1	1	0	1	0	1	1
FLJ38576	0	0	0	0	1	0	0	0	0	0
FLNC	0	0	0	0	0	0	0	0	0	1
FLRT2	0	0	0	0	0	0	1	0	0	0
FLRT3	0	0	1	0	0	1	1	0	1	1
FLVCR2	0	0	1	0	0	0	0	0	1	0
FMNL1-AS1	0	1	1	1	0	1	1	0	0	0
FMNL1-DT	0	0	1	0	0	0	0	0	0	0
FMO5	1	1	1	1	0	0	1	0	1	1
FMOD	0	1	0	0	0	0	0	0	1	0
FN1	0	0	0	0	0	1	0	0	0	1
FNDC4	1	0	0	0	0	1	0	0	1	0
FOLH1	1	0	1	0	0	0	1	0	0	1
FOSB	0	1	0	0	1	0	1	0	0	0
FOXD2	0	1	1	1	0	0	0	0	0	0
FOXD2-AS1	0	0	1	0	0	0	0	0	0	1
FOXF2	0	0	1	0	0	0	0	0	1	0
FOXRED2	0	0	0	0	1	0	0	1	1	0
FOXS1	0	0	1	0	0	0	0	0	0	0
FRAS1	1	0	1	0	1	0	1	1	1	0
FREM2	1	0	0	0	0	0	0	0	0	0
FRG1JP	0	0	1	1	0	0	0	0	1	1
FRK	1	0	1	0	0	0	0	0	1	0
FRMD3	1	0	1	0	0	1	1	1	0	1
FRMD4A	1	0	0	1	1	0	1	0	1	0
FRMPD3	0	1	1	0	1	0	0	0	0	0
FRY	0	0	1	0	0	0	0	0	0	0
FST	1	1	1	1	0	1	0	0	1	1
FSTL3	1	0	0	0	0	0	0	0	0	0
FTCDNL1	1	0	0	0	0	0	0	0	0	0
FTH1P10	1	0	1	0	0	0	0	1	1	1
FTH1P11	0	0	0	0	0	0	0	1	0	0
FTH1P12	1	0	1	0	0	0	0	0	0	0
FTH1P2	0	0	0	0	0	0	0	0	1	0
FTH1P3	1	0	1	0	0	0	0	1	1	1
FTH1P5	1	0	1	0	0	0	0	1	1	1
FTH1P8	1	0	0	0	0	0	0	0	0	0
FUT1	1	0	0	0	0	0	1	0	0	0
FUT2	0	1	1	1	0	1	1	1	0	0
FXYD5	1	0	0	1	0	1	0	0	0	1
FXYD6	0	0	1	0	1	0	1	0	1	0
FYB1	1	1	1	0	0	1	0	0	1	1
FZD10-AS1	1	0	1	1	0	0	1	0	1	1
FZD5	0	0	1	0	1	0	0	0	1	0
FZD8	0	0	0	0	1	0	1	0	0	0
G0S2	0	0	1	0	0	0	0	0	1	0
G2E3	1	0	1	0	0	0	0	0	1	0
GAB2	1	0	1	0	0	0	1	0	0	0
GABBR2	0	1	1	1	0	0	0	0	0	0
GABPB2	0	0	0	0	1	0	0	0	0	0
GABRB2	1	1	1	1	0	1	1	1	1	0
GABRB3	1	0	0	0	1	0	0	0	0	0
GABRD	0	0	0	1	1	0	1	0	0	1
GADD45G	0	0	0	1	0	0	0	0	0	0
GAL3ST4	1	1	1	1	0	0	1	0	1	1
GALE	1	1	1	1	0	1	1	1	1	1
GALNT17	0	0	0	0	1	0	1	0	0	0
GALNT7	1	1	1	1	0	1	1	1	1	1
GALNT7-DT	0	0	1	0	0	0	1	1	0	1
GAPDHP65	1	0	1	0	1	0	0	0	1	0
GAREM2	1	0	0	0	0	0	0	1	0	0
GARNL3	0	0	0	0	1	0	0	0	0	0
GAS1	0	0	0	0	0	0	0	0	0	1
GAS2	0	0	1	0	1	0	0	0	0	0
GAS2L3	1	1	1	0	0	1	1	1	1	1
GAS6-AS1	1	0	0	1	0	0	0	0	0	0
GASK1A	0	0	0	1	1	0	0	0	1	0
GATM	0	0	0	0	1	0	0	0	0	0
GBP1	0	0	1	0	0	0	0	0	0	0
GBP1P1	0	0	0	0	1	0	0	0	1	0
GCNT4	1	1	1	1	0	1	1	0	1	1
GCSAM	1	1	1	0	1	0	1	0	1	0
GCSH	0	0	0	0	1	0	0	0	0	0
GDF15	0	0	0	0	0	0	0	0	0	1
GEMIN8P4	1	0	1	0	1	0	0	0	0	0
GFAP	0	1	0	0	0	0	0	0	1	0
GFOD2	0	0	1	0	0	0	0	0	0	0
GFPT2	1	1	1	0	0	0	0	0	1	1
GFRA2	0	0	1	1	0	1	0	0	0	0
GGCT	0	1	0	0	0	1	1	1	0	1
GGN	0	1	0	1	0	1	1	0	0	0
GGT2	0	0	1	0	0	1	0	0	0	1
GHR	1	0	0	0	0	0	0	0	1	0
GHRL	0	1	1	0	1	0	0	0	1	0
GIMAP5	0	1	1	1	0	0	0	0	0	0
GINS1	0	1	0	0	0	1	1	1	0	0
GINS2	0	0	1	1	0	0	1	1	1	0
GIPC2	0	0	0	1	1	0	0	0	0	0
GIPC3	0	0	0	1	1	0	1	0	0	0
GIPR	1	0	1	0	0	0	0	0	0	0
GJA4	0	0	1	0	1	0	1	0	0	0
GJA5	1	0	1	1	0	0	1	0	1	1
GJC1	0	0	1	1	1	0	1	0	1	0
GK	1	0	1	0	1	0	0	0	1	0
GLI3	0	1	1	0	1	0	0	0	1	0
GLIPR1L2	0	0	1	0	0	0	0	0	0	0
GLIS3	0	0	1	0	1	0	0	0	1	0
GLRB	0	0	0	0	0	0	0	1	0	1
GLT1D1	0	0	0	0	0	0	1	0	0	0
GLT8D2	0	0	1	0	1	0	0	0	0	0
GLTPD2	1	0	0	0	1	0	0	0	0	0
GNA14	0	0	0	0	1	0	0	0	0	0
GNA15	1	0	0	0	0	0	0	0	0	0
GNAI1	0	0	1	0	0	0	0	0	0	0
GNAL	0	0	0	0	1	0	0	0	0	0
GNAO1	1	0	1	0	0	0	0	1	1	0
GNB1-DT	0	0	0	0	1	0	0	0	0	0
GNG12-AS1	0	0	0	0	1	0	0	0	1	0
GNG4	0	0	0	0	0	0	1	0	0	0
GNL3L	1	0	1	0	1	0	0	0	1	0
GNLY	0	0	1	1	0	0	0	0	0	1
GNMT	0	0	1	0	0	0	0	0	0	0
GOLGA7B	0	1	1	1	0	1	0	1	1	0
GOLGA8N	0	0	0	0	1	0	0	0	0	0
GOLT1A	0	1	0	0	0	0	0	0	0	0
GP1BA	0	0	1	1	1	0	0	0	0	0
GPAM	0	0	0	0	1	0	0	0	0	0
GPAT3	0	0	0	0	1	0	0	0	0	0
GPD1	0	0	0	0	0	0	0	0	0	1
GPM6A	0	0	1	0	1	0	0	0	0	0
GPM6B	1	1	0	1	1	0	1	0	1	0
GPR132	1	0	0	0	0	0	0	0	0	0
GPR135	0	0	0	1	0	0	0	0	0	0
GPR137C	0	0	0	0	0	0	1	0	0	0
GPR153	1	1	1	1	0	1	1	0	1	1
GPR155	1	0	1	0	1	0	0	0	0	0
GPR155-DT	1	0	0	0	0	0	0	0	0	0
GPR161	0	0	1	0	0	0	0	0	0	0
GPR162	1	1	1	1	0	1	1	0	1	0
GPR173	0	0	0	0	0	0	0	0	0	1
GPR183	1	0	1	1	0	1	1	0	1	1
GPR37L1	0	1	0	0	0	0	0	0	1	0
GPR4	0	0	0	1	0	0	0	0	0	0
GPR83	0	0	0	0	1	0	1	0	0	0
GPR85	1	0	1	0	0	0	1	0	1	0
GPRC5B	1	0	1	1	0	1	1	1	1	1
GPRIN1	0	0	1	0	0	0	0	1	0	0
GPSM1	1	1	0	1	1	0	1	0	0	0
GPT	0	0	0	1	0	0	0	0	0	1
GPX1P1	1	0	0	0	0	0	0	0	1	1
GRAMD1B	0	0	1	0	1	0	1	0	0	0
GRAMD2A	0	0	1	0	0	0	0	0	1	0
GRAP2	1	0	1	1	0	0	0	0	1	0
GRB10	0	0	0	0	1	0	1	0	0	0
GRB7	1	1	1	0	0	1	1	0	0	0
GREB1	1	0	0	0	1	0	1	0	0	1
GRHL1	1	1	1	0	1	1	1	0	0	1
GRIK3	1	1	1	0	0	0	1	0	1	0
GRIK4	0	0	0	0	1	0	0	0	0	0
GRIN2C	0	0	1	0	1	0	0	0	0	0
GRIN2D	0	0	0	0	1	0	0	0	1	1
GRIP1	0	0	1	0	1	0	1	0	0	0
GRK1	0	0	0	0	1	0	0	0	0	0
GSDMB	0	1	0	1	1	0	1	0	0	1
GSTM3	0	0	0	0	1	0	0	0	0	0
GTF2H2	1	0	1	0	0	0	1	0	0	0
GTF2H2C	0	0	0	0	1	0	1	0	0	0
GTF2H4	0	1	1	0	0	0	1	0	0	0
GTF2IRD2	0	0	0	0	1	0	1	0	0	0
GTF2IRD2P1	0	0	1	1	1	0	0	0	0	0
GTSE1-DT	0	0	0	0	1	0	0	0	0	0
GUCY1B1	0	0	0	0	0	1	1	0	1	1
GUCY2D	1	1	1	0	0	0	1	0	1	0
GULP1	0	0	0	0	0	0	1	0	0	0
GUSBP11	0	1	1	1	0	1	1	0	1	1
GUSBP18	0	0	0	0	0	0	0	0	1	0
GUSBP2	0	0	1	0	1	0	1	0	0	0
GVINP1	1	1	0	1	1	0	0	0	1	0
GVQW3	0	0	0	0	1	0	0	0	0	0
GZMM	0	1	0	0	0	0	0	0	1	0
H1-10-AS1	0	0	1	0	0	0	0	0	0	0
H2AW	1	0	1	1	0	1	1	0	1	0
HACD1	0	0	1	0	0	1	1	1	0	1
HAGHL	0	0	0	0	0	0	0	0	0	1
HAP1	0	0	0	0	1	0	0	0	0	0
HAS3	1	0	0	0	0	0	0	0	0	0
HBA2	0	0	1	1	1	0	0	0	0	0
HBB	0	0	1	1	1	0	1	0	1	0
HCG11	0	1	1	1	1	1	1	0	0	0
HDAC4	0	0	1	0	0	0	0	0	0	0
HDAC9	1	0	1	1	1	0	1	0	0	0
HEATR4	0	0	0	0	1	0	0	0	0	0
HEATR5A-DT	0	0	0	0	0	0	0	0	1	0
HELB	0	0	1	1	1	0	1	0	1	0
HELLPAR	1	0	0	0	0	0	0	0	1	0
HELLS	1	1	1	0	0	0	0	1	1	1
HERPUD2-AS1	0	0	0	0	1	0	1	0	0	0
HES4	1	1	0	1	0	0	0	0	0	1
HES6	1	0	0	0	0	0	1	0	0	1
HESX1	0	0	1	0	1	0	1	0	0	0
HEY1	0	0	0	1	1	0	1	0	0	0
HEY2	0	1	1	1	0	0	1	0	0	1
HEY2-AS1	0	0	0	0	0	0	1	0	0	0
HGD	1	0	0	0	1	0	0	0	0	0
HGF	1	0	0	1	0	0	0	0	1	0
HHIPL1	1	1	0	0	0	0	1	0	1	0
HIC2	0	1	1	1	0	0	1	0	0	0
HIF3A	0	0	1	0	0	0	0	0	1	0
HIGD1B	0	0	0	1	0	0	0	0	0	0
HIP1	0	0	0	0	0	0	1	0	0	0
HIPK4	0	1	0	0	0	1	0	0	0	0
HIVEP3	1	1	1	0	1	0	1	0	1	0
HK2-DT	0	0	0	0	0	0	1	0	0	0
HK3	1	1	1	0	0	1	0	0	1	1
HKDC1	1	0	1	0	1	0	0	0	1	0
HLA-DQB2	0	0	1	1	0	1	0	0	0	1
HLA-F-AS1	1	0	1	0	0	0	1	1	1	0
HLA-G	0	0	0	0	0	0	1	0	0	0
HLA-K	1	1	1	1	0	0	0	0	1	1
HLA-V	1	0	1	1	0	0	0	0	1	1
HLF	0	0	0	0	1	0	0	0	0	0
HLX	0	0	1	1	0	0	0	0	1	1
HMCN2	0	0	1	0	0	0	0	0	0	0
HOMER3-AS1	0	0	0	1	0	0	0	0	0	0
HOXA3	0	1	1	0	0	0	0	0	0	0
HOXB6	0	1	0	1	0	0	0	0	1	0
HPCA	0	1	1	0	1	1	0	0	1	0
HPCAL4	0	1	0	0	0	1	0	0	1	1
HPD	0	0	1	0	1	0	0	0	0	0
HPGDS	0	1	1	0	0	1	0	0	1	1
HPN	1	0	1	0	0	1	1	0	1	1
HPSE	1	0	0	0	0	1	0	0	0	0
HR	0	0	0	0	1	0	0	0	0	1
HRH1	0	1	0	0	0	0	1	0	0	0
HRK	1	0	1	0	0	1	1	1	1	0
HROB	0	0	1	0	0	0	0	0	0	0
HS3ST3B1	0	1	1	1	1	0	0	0	1	0
HSD11B2	0	0	0	0	1	0	0	0	0	0
HSD17B6	0	0	0	0	0	0	1	0	0	0
HSD3B7	1	0	1	1	0	0	0	0	1	1
HSP90B2P	0	0	0	0	1	0	0	0	0	0
HSPA12A	0	0	0	0	1	0	0	1	0	0
HSPA2	0	0	1	0	0	0	0	0	0	0
HSPB6	0	1	1	1	1	0	0	0	0	0
HSPB7	0	0	0	0	1	0	0	0	0	0
HSPB8	1	0	0	0	1	0	1	0	0	0
HTR7P1	0	0	0	0	1	0	1	0	0	0
HTRA3	0	1	1	0	0	0	1	0	1	1
HYDIN	0	0	0	0	1	0	0	0	0	0
HYDIN2	0	1	1	1	1	1	1	0	1	1
HYKK	0	0	0	0	1	0	0	0	0	0
IBA57	1	0	1	0	1	0	0	0	0	0
ICAM1	0	0	0	0	0	0	0	0	1	1
ICAM5	1	1	1	1	0	1	1	0	1	1
ID2-AS1	0	0	0	1	0	0	0	0	0	0
IER5	0	1	0	0	0	0	0	0	0	0
IER5L	1	0	1	0	0	0	1	0	1	1
IFITM10	0	0	0	1	0	1	1	0	1	1
IFTAP	0	0	0	0	1	0	0	0	0	0
IGF2	0	1	1	1	0	1	1	0	1	1
IGF2BP2	1	1	0	1	0	1	1	0	0	1
IGFALS	1	0	0	0	0	0	1	0	0	0
IGFBP2	0	0	0	1	0	0	0	0	1	1
IGFBP3	0	1	1	1	0	0	1	0	1	1
IGFBP6	0	0	0	0	0	0	1	0	0	0
IGHG4	1	1	1	1	0	0	0	0	1	0
IGSF3	1	1	0	0	0	0	0	0	0	0
IGSF6	1	1	1	1	0	1	0	0	1	1
IGSF9	1	1	1	1	0	1	1	0	1	1
IGSF9B	0	0	0	0	0	0	1	0	0	0
IHO1	1	0	1	0	1	0	0	0	1	0
IKZF1	1	1	1	0	0	1	0	0	1	0
IKZF3	1	0	1	1	0	1	1	0	1	1
IL16	0	1	0	0	0	0	0	0	1	0
IL17D	0	0	0	1	1	0	0	0	1	0
IL17RD	1	1	1	1	0	1	1	0	1	1
IL18	0	0	0	1	0	0	0	0	0	0
IL18R1	0	0	0	1	0	0	1	0	0	1
IL1RAP	0	0	0	1	0	1	0	0	0	0
IL1RN	0	0	1	0	0	0	1	1	1	0
IL20RA	0	0	1	0	0	0	0	0	1	0
IL23A	0	0	1	0	0	0	1	0	1	0
IL24	0	1	1	0	0	0	0	0	1	0
IL33	0	1	1	1	0	0	0	0	1	0
IL4I1	1	1	0	1	0	1	0	0	1	1
IL7	0	0	1	0	0	1	1	0	1	1
IL7R	1	1	1	0	0	1	0	0	1	0
IMPA2	0	0	0	0	1	0	1	0	0	0
INF2	0	1	0	1	0	0	0	0	0	0
ING3	0	0	0	1	1	0	0	0	0	0
INHA	0	0	0	0	1	0	0	0	0	0
INHBA	1	0	1	0	0	1	0	0	1	0
INHBB	0	1	1	0	0	1	0	0	0	0
INKA1	0	1	0	0	0	0	0	0	0	0
INSR	0	0	0	0	0	0	1	0	0	0
INSYN1	1	0	0	0	0	0	0	0	1	0
INSYN2A	0	0	0	1	0	0	0	0	0	0
IP6K3	0	0	0	0	0	0	0	0	1	0
IPCEF1	0	0	1	0	1	0	0	0	1	0
IPO9-AS1	0	0	0	1	1	0	1	0	0	0
IQCG	0	0	1	0	1	0	0	0	0	0
IQCH	0	0	0	0	1	0	0	0	0	0
IQCH-AS1	0	0	0	0	1	0	1	0	0	0
IQCN	0	0	1	1	1	0	1	0	0	1
IQGAP2	1	0	1	0	1	0	0	0	0	0
IQGAP3	1	0	1	1	0	1	0	0	1	1
IQSEC3	0	1	0	1	0	1	1	0	0	1
IRAG2	1	1	1	0	1	0	0	0	0	0
IRAK2	1	1	1	1	0	1	1	1	1	1
IRF5	1	1	1	1	0	1	1	1	1	1
IRF8	0	0	0	1	0	0	0	0	1	0
IRS1	0	0	0	0	1	0	0	0	0	0
ISG20	0	1	1	0	0	0	1	0	1	0
ISLR2	0	0	1	0	0	0	0	0	0	0
ISM1	0	0	1	0	1	0	0	0	1	0
ISYNA1	0	1	1	1	0	1	1	0	1	1
ITGA10	0	0	1	1	1	0	1	0	0	0
ITGA11	1	0	1	0	0	1	1	0	0	1
ITGA2	1	1	1	0	0	1	1	0	0	0
ITGA2B	0	0	0	1	1	0	1	0	0	0
ITGA7	0	0	0	1	0	0	0	0	0	0
ITGA8	1	1	0	1	1	0	1	0	1	0
ITGAL	0	1	0	0	0	0	0	0	0	0
ITGAM	0	0	1	0	0	0	0	0	0	0
ITGB1BP2	0	0	1	0	0	0	0	0	1	0
ITGB4	1	1	1	0	0	1	0	0	1	1
ITGB8-AS1	0	0	1	0	0	1	0	0	0	0
ITIH3	0	1	0	0	1	0	1	0	1	0
ITK	1	1	1	0	0	0	0	0	0	0
ITPKA	0	0	1	0	0	0	0	0	0	0
ITPR1	0	0	0	0	1	0	0	0	0	0
IYD	1	0	1	0	1	0	0	0	0	0
JAG2	0	1	0	0	0	0	0	0	0	1
JAK3	0	1	1	0	0	0	0	0	1	1
JDP2-AS1	1	0	1	0	0	0	0	0	1	0
JHY	1	0	1	0	0	0	0	0	1	0
JMJD1C-AS1	0	0	0	0	1	0	0	0	0	0
JPH1	1	0	0	1	0	1	0	1	0	1
JRK	0	0	0	0	1	0	0	0	0	0
KANTR	0	0	0	0	0	0	0	0	1	0
KATNAL2	0	0	0	0	1	0	0	0	0	0
KBTBD11	0	0	0	0	1	0	1	0	0	0
KBTBD8	0	1	0	0	0	1	0	0	1	0
KCNA5	1	0	1	0	1	0	0	0	1	0
KCNAB1	0	0	1	0	0	0	0	0	0	0
KCNAB3	0	1	1	1	1	0	1	0	1	1
KCNE2	0	0	0	1	0	0	0	0	0	0
KCNH3	0	1	0	0	0	0	1	0	0	0
KCNIP3	0	0	0	0	1	0	0	0	0	0
KCNIP4	0	0	0	0	1	0	1	0	0	0
KCNJ2	0	1	1	1	0	1	1	0	1	1
KCNJ2-AS1	0	0	0	0	0	0	0	0	0	1
KCNK2	0	0	1	0	1	0	0	0	0	0
KCNK6	1	1	1	1	0	0	0	0	0	1
KCNMB1	1	1	0	0	0	1	1	0	1	1
KCNMB3	0	0	1	0	1	0	1	0	0	0
KCNN2	0	0	0	0	0	0	0	0	0	1
KCNN3	1	0	1	1	1	0	1	0	0	0
KCNN4	1	0	1	0	0	0	1	0	1	1
KCNQ3	1	1	1	1	0	1	1	1	1	1
KCNQ5	0	0	0	0	1	0	0	0	0	0
KCNS3	1	1	1	1	0	1	1	1	0	1
KCNV1	0	0	0	0	0	1	0	0	1	1
KCP	0	1	1	1	0	1	1	0	1	1
KCTD21-AS1	0	0	0	0	1	0	0	0	0	0
KDELR3	1	0	0	0	0	1	1	0	1	1
KDM7A-DT	1	0	1	0	1	0	0	0	0	0
KEL	1	1	1	0	1	0	0	0	1	0
KHDRBS3	0	1	0	0	0	1	1	0	1	1
KIAA0895	0	0	0	0	1	0	1	0	0	0
KIAA1328	0	1	0	0	0	0	1	0	1	0
KIAA1549	1	0	0	1	1	0	0	0	0	0
KIAA1614	0	0	0	0	1	0	0	0	0	0
KIF12	0	0	1	1	1	0	0	0	0	0
KIF17	0	0	1	0	0	0	0	0	0	0
KIF19	1	1	1	0	1	0	0	0	0	0
KIF1A	1	0	0	0	1	0	0	0	0	0
KIF21B	0	0	0	0	0	0	0	0	1	0
KIF23	0	0	1	0	0	0	1	0	0	1
KIF23-AS1	0	0	0	0	1	0	1	0	1	0
KIF24	1	0	0	0	1	0	0	0	0	0
KIF26B	0	1	1	0	1	0	0	0	0	0
KIF4A	1	1	1	1	0	1	1	0	0	1
KIF6	0	0	1	0	0	0	0	0	0	0
KIZ	0	0	0	0	1	0	0	0	0	0
KL	1	0	1	1	1	1	1	0	0	0
KLB	0	0	0	0	1	0	0	0	0	0
KLC3	0	0	0	0	0	0	1	0	0	0
KLF15	0	0	0	0	1	0	0	0	0	0
KLHDC7B	1	0	1	1	0	0	0	1	0	0
KLHDC8A	0	0	0	0	0	0	1	0	0	0
KLHL17	0	1	0	0	0	0	1	0	0	0
KLHL3	0	0	0	0	0	0	0	1	0	0
KLHL30	0	0	0	0	0	0	1	0	0	0
KLHL32	1	0	1	0	0	1	0	0	1	1
KLHL6	1	1	1	1	0	0	0	0	1	1
KLHL8	0	0	1	0	0	0	0	0	0	0
KLKB1	0	0	1	1	1	0	0	0	0	1
KLLN	1	0	0	0	0	0	1	0	0	0
KLRD1	1	1	1	1	0	0	0	0	0	0
KLRG1	0	1	1	1	1	0	0	0	0	0
KLRG2	1	0	1	0	1	0	1	0	1	0
KNOP1	1	0	0	0	0	0	0	1	1	1
KNTC1	1	0	1	1	0	1	0	1	0	0
KRT19	1	1	1	0	0	0	0	0	0	1
KRT80	1	1	1	1	0	0	1	1	1	1
KRT87P	0	0	0	1	1	0	0	0	0	0
KSR1	1	0	1	0	0	0	0	0	0	0
KSR2	0	0	0	0	1	0	0	0	1	0
KTN1-AS1	0	0	0	0	0	0	1	0	0	0
KY	0	0	1	0	0	0	0	0	0	0
L3MBTL4	0	0	0	0	1	0	0	0	0	0
LAD1	1	1	1	0	0	1	1	1	1	1
LAG3	0	1	0	0	0	0	0	0	0	0
LAMA2	1	0	1	0	0	1	0	0	0	1
LAMB2P1	0	0	0	1	1	0	0	0	0	0
LAMB3	1	1	1	0	0	1	0	0	1	0
LAMP3	1	1	1	0	0	1	1	1	1	1
LAYN	0	1	1	0	0	0	0	0	1	0
LBX2	0	1	0	0	0	0	1	0	0	0
LBX2-AS1	0	0	0	1	0	0	0	0	1	1
LCA5L	0	0	0	0	1	0	0	0	0	0
LCMT1-AS1	0	0	1	0	0	0	0	0	0	0
LCN2	1	0	0	0	0	0	0	0	1	1
LDB3	0	0	1	1	1	0	1	0	1	0
LDHD	1	0	0	0	0	0	0	0	0	0
LDLRAD3	1	1	1	1	0	1	1	1	1	1
LEAP2	0	0	0	1	1	0	0	0	0	0
LEKR1	0	0	0	0	1	0	0	0	0	0
LEMD1	0	0	0	0	0	1	0	0	1	0
LENG9	0	0	0	1	0	1	1	0	0	1
LEPR	0	0	0	0	0	0	1	0	0	0
LETM2	0	0	0	1	0	0	0	0	1	0
LETR1	0	1	1	1	1	0	1	0	1	0
LGALS2	1	0	0	0	0	0	0	0	1	0
LGALS3	0	0	0	0	0	1	1	0	0	0
LGI2	1	0	1	0	1	0	0	0	1	0
LGI3	0	0	0	0	1	0	0	0	0	0
LGI4	0	0	0	0	1	0	0	0	1	0
LGR6	0	1	1	1	1	0	1	0	1	1
LHX4	1	0	0	0	0	0	0	0	0	0
LHX6	0	0	0	1	1	0	1	0	0	0
LIFR	0	0	0	0	1	0	0	0	0	0
LIFR-AS1	0	0	0	0	1	0	0	0	0	0
LILRA2	0	1	1	1	0	1	0	0	0	0
LILRA6	1	0	0	1	0	0	1	0	1	0
LIMK1	0	1	0	1	0	1	0	0	0	0
LIN7A	1	0	1	0	1	0	1	0	0	0
LINC00092	0	0	1	0	1	0	0	0	1	0
LINC00205	0	0	0	0	1	0	0	0	0	0
LINC00235	0	0	0	0	0	0	1	0	0	0
LINC00310	0	0	0	1	0	0	0	0	0	0
LINC00426	0	0	0	0	0	0	0	0	1	0
LINC00472	0	0	0	0	1	0	1	0	0	0
LINC00476	0	0	1	1	1	0	1	0	0	0
LINC00482	1	0	0	0	1	0	0	0	0	0
LINC00511	0	0	0	1	0	0	0	0	0	0
LINC00513	1	0	0	0	0	0	0	1	0	0
LINC00539	1	0	0	0	0	0	0	0	0	0
LINC00638	1	0	1	0	1	0	0	0	0	0
LINC00641	0	0	1	0	0	0	0	0	0	0
LINC00649	0	0	1	1	0	0	0	0	1	0
LINC00654	0	1	1	0	1	1	1	0	1	0
LINC00672	0	1	1	1	0	1	0	0	1	0
LINC00702	0	0	0	1	0	0	0	0	1	1
LINC00852	0	0	1	1	1	0	0	0	0	0
LINC00853	1	0	1	1	0	0	0	0	0	1
LINC00863	1	0	0	0	1	0	1	0	1	0
LINC00869	1	1	1	1	0	0	1	0	1	1
LINC00882	0	0	0	0	1	0	0	0	0	0
LINC00886	0	0	0	0	1	0	0	0	0	0
LINC00896	0	0	0	0	1	0	0	0	0	0
LINC00900	0	0	0	0	1	0	0	0	0	1
LINC00924	0	0	0	1	0	0	0	0	1	0
LINC00926	0	0	1	0	0	0	0	0	1	0
LINC00954	1	1	0	1	0	1	0	1	1	0
LINC00987	0	1	1	0	0	0	0	0	0	0
LINC01132	0	0	0	0	0	0	0	0	0	1
LINC01144	0	0	0	0	1	0	0	0	0	0
LINC01176	0	0	1	1	0	1	1	0	1	1
LINC01232	0	0	1	0	1	0	0	0	0	0
LINC01235	0	0	0	0	1	0	0	0	0	0
LINC01270	0	0	1	0	1	0	0	0	0	0
LINC01301	1	0	1	0	0	0	0	0	1	0
LINC01431	0	0	0	0	1	0	0	0	0	0
LINC01465	0	0	1	1	1	0	0	0	0	1
LINC01503	0	1	0	0	0	0	0	0	0	0
LINC01508	0	0	0	0	1	0	0	0	0	0
LINC01521	0	0	1	0	0	0	1	0	1	0
LINC01550	1	0	0	0	1	0	0	0	0	0
LINC01588	0	1	0	0	0	0	0	0	0	0
LINC01607	0	0	0	0	1	0	0	0	0	0
LINC01637	1	0	1	0	0	0	1	0	0	1
LINC01725	1	0	0	0	1	0	0	0	0	0
LINC01881	0	0	0	0	0	0	0	0	1	0
LINC01936	0	0	0	0	1	0	0	0	0	0
LINC02019	0	0	0	1	0	1	0	0	0	0
LINC02021	0	0	0	1	1	0	1	0	0	0
LINC02298	0	1	1	1	0	1	1	0	1	1
LINC02361	0	0	1	1	0	0	0	0	0	0
LINC02447	0	0	0	1	0	0	0	0	0	0
LINC02481	1	0	0	0	0	0	1	0	0	0
LINC02593	0	0	0	0	1	0	1	0	0	1
LINC02609	0	0	0	0	1	0	0	0	0	0
LINC02696	0	0	0	1	1	0	0	0	0	0
LINC02731	0	0	1	0	1	0	0	0	0	0
LINC02762	0	0	1	0	0	0	0	0	0	0
LINC02777	0	0	0	0	1	0	0	0	0	0
LINC02846	1	0	0	1	0	0	1	0	0	0
LINC02861	1	0	0	0	0	0	0	0	0	0
LINC02916	0	0	1	0	1	0	1	0	0	0
LINC02918	0	0	0	0	1	0	0	0	0	0
LINGO1	1	0	0	0	0	0	0	0	0	0
LINGO4	0	1	1	1	1	0	1	0	1	1
LIPH	0	0	0	1	0	1	0	1	1	0
LIPT2	0	0	0	1	1	0	0	0	0	0
LIX1L-AS1	0	0	0	1	1	0	0	0	0	0
LMNTD2	0	0	1	1	1	0	0	0	0	0
LMNTD2-AS1	0	1	1	1	1	0	1	0	0	0
LMO3	1	1	1	1	0	1	1	0	1	1
LMOD1	0	0	0	0	1	0	0	0	0	0
LNC-LBCS	0	0	0	0	0	0	1	0	0	0
LNCTAM34A	0	0	0	0	0	0	0	1	0	1
LOH12CR2	0	0	0	0	1	0	0	0	0	0
LONRF2	0	0	0	1	0	1	0	1	1	1
LONRF3	0	0	0	0	0	0	1	0	1	0
LOXL2	1	1	0	0	0	0	1	0	1	1
LPAR1	0	1	0	0	1	0	0	0	0	0
LPAR5	0	0	0	1	0	1	1	1	1	1
LPL	1	1	1	1	0	1	1	0	1	1
LPP-AS2	0	0	1	0	1	0	0	0	1	0
LRAT	0	0	0	0	1	0	0	0	0	0
LRATD1	1	0	1	0	0	1	0	0	1	1
LRFN1	1	0	1	0	1	0	0	0	0	0
LRG1	0	0	0	1	0	0	0	0	0	1
LRIG1	0	0	1	0	1	0	0	0	0	0
LRIG2-DT	0	0	1	0	0	0	0	0	0	0
LRP2	1	0	0	0	1	0	0	0	0	0
LRP4	1	0	0	0	0	0	0	0	0	1
LRP5L	0	0	1	1	0	0	1	0	0	0
LRP8	0	0	1	0	1	0	1	0	0	0
LRRC10B	0	1	0	0	0	0	1	0	0	0
LRRC2	0	0	0	0	1	0	0	0	0	0
LRRC25	1	1	1	1	0	0	0	0	1	0
LRRC37A5P	0	0	0	0	1	0	0	0	0	0
LRRC51	0	0	0	0	1	0	0	0	0	0
LRRC7	0	0	1	0	1	0	0	0	1	0
LRRC75A	0	0	0	1	1	0	0	0	0	0
LRRC8C-DT	1	0	1	1	1	0	0	0	1	0
LRRC8D-DT	0	0	0	1	1	0	0	0	0	0
LRRCC1	0	0	0	0	1	0	0	0	1	0
LRRIQ1	0	0	0	0	1	0	0	0	0	0
LRRK2	0	1	1	1	0	1	1	1	1	1
LRRK2-DT	0	0	1	0	0	0	0	0	0	0
LRRN3	1	1	1	1	1	0	1	0	0	1
LSP1	1	1	1	1	0	1	0	0	1	1
LST1	1	1	1	1	0	1	0	0	1	1
LTBP1	0	0	0	1	0	0	0	0	0	0
LTF	0	0	1	0	1	0	0	0	1	0
LTK	0	1	0	0	0	0	0	0	0	0
LURAP1L	1	0	1	0	0	0	0	1	0	1
LY6E	1	1	0	1	0	0	1	0	0	1
LYPD5	0	1	0	0	0	0	0	0	0	0
LYVE1	0	1	1	1	1	0	0	0	0	0
LZTS1	1	1	0	1	0	0	1	0	0	0
M1AP	0	0	0	0	0	0	0	0	0	1
MACC1	1	0	0	1	0	0	1	1	0	1
MACROD2	1	1	1	1	0	1	0	0	0	1
MAD2L2	1	1	0	0	0	0	1	0	1	0
MADCAM1	1	0	0	1	0	0	0	0	0	0
MAFB	0	1	0	0	1	0	0	0	0	0
MAFTRR	0	0	0	0	1	0	0	0	0	0
MAGI2	0	0	0	0	1	0	0	0	0	0
MAK	0	0	0	1	1	0	1	0	0	0
MALINC1	0	0	0	0	1	0	1	0	1	0
MALL	1	0	1	0	1	0	1	0	1	0
MAMDC2	0	1	1	0	0	0	1	0	1	0
MAMLD1	1	0	0	1	0	1	1	0	1	0
MAN1A1	1	1	1	0	0	1	0	0	0	1
MANEAL	1	0	0	0	0	1	0	1	1	1
MAOB	0	0	1	0	1	0	0	0	0	0
MAP1A	1	1	0	0	0	0	1	0	0	0
MAP2K5-DT	0	0	0	0	1	0	0	0	0	0
MAP2K6	1	0	0	0	0	0	1	0	1	0
MAP3K6	1	1	0	0	0	0	1	0	0	1
MAP3K8	1	0	0	0	0	0	1	0	1	0
MAP6	0	0	0	1	0	0	0	0	0	0
MAP7D3	0	0	0	0	1	0	0	0	0	0
MAPK12	1	0	1	1	0	0	1	1	1	0
MAPK4	1	0	1	0	1	0	0	0	0	0
MAPK8IP1	0	0	0	0	1	0	1	0	0	0
MAPK8IP2	0	1	1	0	0	0	0	1	1	0
MAST1	0	0	0	0	0	0	1	0	0	0
MAST3	0	1	0	0	0	0	0	0	0	0
MATN2	0	0	0	0	1	0	0	0	0	0
MATN3	1	1	1	0	0	1	1	0	1	0
MB	1	0	0	0	1	0	0	0	1	0
MBL1P	1	1	0	1	0	0	0	0	1	0
MBOAT2	0	1	1	0	0	0	1	1	0	0
MCAM	1	1	0	0	0	0	1	0	0	0
MCF2L2	1	1	0	1	0	1	1	1	0	1
MCM10	1	1	0	0	0	0	1	0	1	0
MCM4	1	1	1	0	0	0	1	1	1	0
MCOLN3	0	0	0	0	0	0	0	1	0	0
MCPH1-AS1	0	0	1	0	1	0	0	0	0	0
MCTP1	0	1	1	1	0	1	1	0	1	0
MCTP2	0	1	0	1	0	1	1	0	1	1
MCUB	1	0	1	1	0	0	1	0	0	0
MDFI	0	0	1	1	0	1	1	0	0	0
MDGA1	0	0	1	0	0	0	0	0	0	0
MDH1B	0	0	0	0	0	0	1	0	0	0
MDK	0	1	0	1	0	1	0	0	1	1
MDS2	1	0	1	0	1	0	0	0	0	0
ME1	1	0	1	0	1	0	0	0	0	0
ME3	1	1	1	1	0	1	1	0	1	0
MECOM	0	0	1	0	0	0	1	0	0	0
MED14OS	0	0	0	1	0	0	1	0	0	0
MEF2B	0	0	0	1	1	0	0	0	0	0
MEF2C-AS1	0	0	1	0	0	0	0	0	0	0
MEI1	0	1	1	1	0	0	0	0	0	0
MEIS1	0	1	1	0	0	0	0	0	1	1
MEIS2	1	1	1	0	1	0	0	0	1	0
MEIS3	1	1	1	1	0	0	1	0	1	1
MELTF	1	1	1	1	0	1	1	1	1	1
MELTF-AS1	0	0	0	1	0	0	1	0	0	0
MEOX2	0	0	0	1	0	0	0	0	1	0
MET	0	0	0	0	0	0	1	1	0	0
METTL7B	0	0	0	0	0	0	1	0	0	0
METTL8	1	0	1	0	1	0	0	0	1	0
MEX3A	1	1	1	1	0	0	0	0	1	1
MFAP2	0	1	0	0	0	0	0	0	0	1
MFAP3L	0	0	0	0	0	0	0	0	1	0
MFAP4	0	1	0	1	0	1	0	0	0	1
MFF-DT	0	0	1	0	1	0	1	0	0	0
MFGE8	1	1	1	1	0	1	1	0	1	1
MFSD14C	1	0	0	0	0	0	0	0	1	0
MFSD4A	0	1	0	1	0	1	0	0	1	1
MGAT3	1	1	1	1	0	1	1	0	1	0
MGC16275	0	0	0	0	1	0	0	0	1	0
MIA2-AS1	0	0	0	0	1	0	0	0	0	0
MICAL2	0	1	0	1	0	1	0	0	0	0
MICAL3	0	1	1	0	1	1	1	0	1	0
MICALL2	0	0	0	1	0	0	0	0	1	1
MICE	0	0	1	0	1	0	0	0	1	0
MID1	0	0	0	0	0	0	0	0	1	0
MIF-AS1	1	0	0	0	0	0	0	0	0	0
MILR1	1	1	1	1	0	1	0	0	1	1
MIPEPP3	0	0	0	0	1	0	0	0	0	0
MIPOL1	0	0	0	0	1	0	1	0	1	0
MIR222HG	0	1	1	0	0	1	0	0	1	1
MIR22HG	1	0	1	0	1	0	1	0	0	0
MIR4453HG	0	0	1	1	1	0	1	0	0	0
MIR497HG	0	0	0	0	0	0	0	0	1	0
MKRN2OS	1	0	1	1	0	1	1	1	0	1
MLF1	0	0	0	0	1	0	1	0	0	0
MLLT11	1	0	0	0	0	0	0	0	1	1
MLLT3	0	0	1	0	1	0	1	0	0	0
MLXIPL	0	0	0	0	0	0	0	1	0	0
MMP11	0	1	0	1	0	1	0	0	1	1
MMP16	1	1	1	1	0	1	1	0	0	0
MMP24	0	1	0	0	1	0	0	0	1	0
MMP25	1	0	0	1	0	0	0	0	0	0
MMRN1	0	0	0	1	0	0	0	0	0	0
MND1	1	0	0	0	0	0	0	0	0	1
MNS1	1	0	1	1	1	0	1	0	0	0
MOB3B	0	0	0	0	1	0	0	0	0	0
MOCOS	1	1	0	0	0	0	0	0	0	0
MOK	0	0	0	0	1	0	0	0	0	0
MORF4L2-AS1	0	0	0	1	0	0	0	0	0	0
MORN3	0	0	1	1	1	0	0	0	0	1
MPHOSPH9	0	0	0	0	1	0	0	0	0	0
MPPED2	0	0	0	0	1	0	0	0	0	0
MPZL2	1	1	0	1	0	1	1	1	1	0
MRC2	1	1	1	1	0	1	1	0	1	1
MREG	1	1	1	1	0	1	0	0	1	1
MRGPRF	0	1	1	1	0	1	1	0	1	1
MROH6	1	0	0	0	0	1	0	0	0	1
MROH7	0	0	0	0	1	0	0	0	0	0
MRPL20-DT	0	0	1	1	0	0	1	0	0	1
MRPS30-DT	0	0	0	0	0	0	0	1	0	0
MS4A14	1	0	0	0	0	0	0	0	0	0
MSANTD2-AS1	0	0	0	0	0	0	1	0	0	0
MSC	1	1	1	1	0	1	0	0	1	1
MSC-AS1	1	1	0	0	0	1	0	0	0	0
MSH5-SAPCD1	0	1	1	1	0	0	0	0	0	1
MSI1	0	0	0	0	1	0	0	0	0	0
MSR1	1	1	1	1	0	1	0	0	1	1
MSRB3	0	1	1	0	1	0	0	0	1	1
MST1L	0	0	1	1	1	1	1	0	0	1
MST1R	1	1	1	0	0	0	1	0	1	1
MSX2	1	0	0	0	1	0	0	0	1	0
MT1F	0	0	1	0	1	0	0	0	0	0
MT1G	0	0	0	0	1	0	0	0	0	0
MT1L	0	0	1	0	0	0	0	0	0	0
MT1M	0	0	1	0	0	0	0	0	0	0
MTARC1	0	0	0	0	1	0	0	0	0	0
MTARC2	0	0	0	0	1	0	0	0	0	0
MTERF4	0	0	1	0	1	0	0	0	0	0
MTHFD1L	1	1	1	1	0	1	1	1	0	1
MTMR11	1	0	1	1	0	1	1	1	1	1
MTMR4	1	0	1	0	0	0	0	0	0	0
MTMR7	0	0	0	1	0	1	1	0	0	0
MTSS1	0	1	1	0	0	0	1	0	0	0
MTSS2	1	0	1	1	0	1	1	0	1	0
MTUS1	0	0	0	1	0	0	0	1	0	1
MUC1	0	1	0	0	0	1	1	0	1	1
MUC20	0	0	0	1	0	1	0	0	0	0
MUC20-OT1	0	0	1	0	1	0	0	0	0	0
MUC4	0	0	0	0	0	1	0	0	1	0
MVP	1	1	1	1	0	1	1	0	1	1
MXRA8	0	1	1	1	0	1	1	0	1	1
MYBL1	1	1	1	0	0	1	1	0	0	1
MYCBPAP	0	0	0	1	1	0	0	0	0	0
MYCL	0	1	1	0	0	0	1	0	0	0
MYCN	1	0	1	0	1	0	1	0	0	0
MYEF2	0	1	1	0	0	1	1	1	1	1
MYG1-AS1	0	1	0	1	0	0	0	0	0	1
MYH11	0	1	1	1	1	0	1	0	1	0
MYH3	1	1	1	0	1	0	1	0	0	0
MYH7B	0	0	0	1	1	0	1	0	0	0
MYL12-AS1	0	0	0	1	1	0	1	0	0	0
MYLK-AS1	0	0	1	1	1	0	1	0	0	0
MYLK4	0	0	1	0	1	0	1	0	1	0
MYLPF	0	1	0	1	0	0	0	0	0	0
MYO1G	1	1	1	1	0	0	1	0	1	1
MYO3B	0	0	1	0	0	0	0	0	1	0
MYO9A	0	0	0	0	0	0	1	0	1	0
MYOM1	0	0	1	0	0	0	0	0	0	0
MYOM3	1	1	1	0	0	0	1	0	1	0
MYOZ3	0	0	0	1	0	0	0	0	0	1
MYRF	0	1	1	1	1	1	1	0	1	1
MYRIP	0	0	1	0	1	0	0	0	0	0
MYZAP	0	0	1	0	0	0	1	0	0	0
MZF1-AS1	0	0	0	0	0	0	1	0	0	0
N4BP2	1	0	1	0	1	0	0	0	1	0
N4BP3	0	0	0	0	0	0	0	0	0	1
NAALAD2	0	1	0	0	1	0	1	0	1	0
NAB2	1	0	0	0	0	1	0	1	1	1
NALCN	1	0	0	0	0	0	1	1	1	0
NALF1	1	0	0	0	1	0	1	0	1	0
NALF2	0	0	0	1	1	0	0	0	0	0
NAPSA	1	1	1	0	0	1	0	0	0	0
NARF-AS2	0	0	1	0	1	0	0	0	0	0
NAT8L	0	1	1	1	0	0	1	0	0	0
NAV2-AS6	0	0	1	1	0	1	1	0	1	1
NBEAL1	0	0	0	0	1	0	0	0	1	0
NBPF19	0	0	1	1	1	1	1	0	1	0
NCAM1	0	0	1	0	0	0	0	0	1	0
NCF1	1	1	0	1	0	0	0	0	0	0
NCF1C	1	1	1	0	0	0	0	0	1	1
NCK1-DT	0	0	0	0	1	0	0	0	0	0
NCMAP	1	0	0	0	0	0	0	0	0	0
NDC80	1	1	1	1	0	0	0	0	1	1
NDRG4	1	0	0	0	0	0	0	0	0	0
NDUFA4L2	0	0	0	0	1	0	0	0	0	1
NDUFA6-DT	0	0	0	0	1	0	1	0	0	0
NDUFV2-AS1	0	0	1	0	1	0	1	0	0	0
NEB	0	0	1	0	1	0	0	0	0	0
NEBL-AS1	0	0	0	1	1	0	0	0	0	0
NECAB1	0	0	1	0	1	0	0	0	1	0
NECTIN1	1	1	1	1	0	1	1	0	1	1
NECTIN4	0	0	0	0	0	0	1	0	0	0
NEGR1	0	1	1	0	1	0	0	0	1	0
NEK1	0	0	0	0	0	0	1	0	0	0
NEK11	0	0	0	0	1	0	0	0	0	0
NEK5	0	0	0	0	1	0	0	0	0	0
NELL2	0	1	1	1	0	0	1	0	1	1
NETO2	1	0	0	0	1	0	0	0	1	0
NEURL1	0	1	0	0	0	1	0	0	0	0
NEURL1B	0	1	1	0	0	1	1	0	1	1
NEXN	0	0	1	0	1	0	0	0	0	0
NFAM1	1	1	1	1	0	0	1	0	1	0
NFASC	0	0	1	0	0	0	0	0	1	0
NFATC1	1	1	0	1	1	0	1	0	1	0
NFATC2	1	0	0	1	0	0	0	0	0	0
NFATC3	1	0	0	0	0	0	1	0	0	0
NFE2L3	0	1	1	1	0	0	0	0	1	0
NFYC-AS1	1	0	1	0	1	0	1	0	0	0
NGFR	0	0	1	1	0	0	0	0	1	1
NHLRC4	0	1	1	1	0	1	1	0	0	1
NHS	0	1	0	0	0	0	0	0	1	0
NHSL1	1	1	1	0	0	1	1	1	1	1
NHSL2	1	0	1	0	1	0	1	1	1	0
NIBAN3	1	0	0	0	0	0	0	0	0	0
NID1	1	1	1	0	0	1	0	0	0	1
NIM1K	1	0	1	0	1	0	0	0	0	0
NKAIN4	1	1	0	0	0	1	1	0	1	1
NKD2	1	1	0	1	0	1	0	0	1	1
NKX3-1	1	1	1	1	1	0	1	0	1	1
NMNAT3	0	0	1	0	0	0	0	0	0	0
NOC2LP1	1	0	0	0	1	0	0	0	0	0
NOCT	0	1	0	0	1	0	0	0	0	0
NOD1	0	1	1	1	0	1	1	0	1	1
NOL4L	1	0	1	0	1	1	0	0	1	1
NOS1AP	0	0	1	0	0	0	0	1	0	0
NOS3	1	1	1	0	1	0	0	0	0	1
NOTCH3	0	0	1	0	1	0	0	0	0	0
NOX1	0	0	0	1	0	0	0	0	0	0
NOX4	1	0	0	1	0	0	1	0	1	1
NPAS1	0	0	0	1	0	1	0	0	1	1
NPC2	0	1	0	0	0	0	0	0	0	0
NPDC1	0	0	1	1	0	0	0	1	0	1
NPR3	0	0	0	0	1	0	0	0	0	0
NPTX2	0	0	0	1	0	0	0	0	0	0
NPTXR	0	1	1	0	0	0	1	0	1	0
NR1D1	1	1	1	0	0	0	1	0	0	0
NR2E3	0	0	0	1	1	0	0	0	0	0
NR2F1-AS1	1	0	0	0	0	1	0	0	1	1
NR2F2-AS1	0	0	1	1	1	0	1	0	1	1
NR4A1	0	0	1	1	0	0	0	0	1	0
NR4A2	1	1	0	1	1	0	1	0	0	0
NR4A3	0	1	0	0	0	0	0	0	0	0
NRARP	1	1	0	1	1	0	1	0	0	1
NRCAM	1	1	1	1	0	1	1	0	1	1
NRG1	1	0	1	0	1	0	1	0	1	0
NRG2	1	0	1	0	0	0	0	0	0	0
NRIP1	1	1	1	1	0	1	1	0	1	0
NRP2	1	0	1	0	0	1	1	0	1	1
NRROS	1	1	1	1	0	1	0	0	1	1
NRSN2-AS1	1	0	0	0	1	0	0	0	0	0
NRXN2	1	0	1	0	1	0	0	0	1	0
NSG1	0	0	1	0	0	1	0	0	0	1
NTM	0	0	1	0	0	0	0	0	0	0
NTN1	1	0	0	0	0	0	0	0	0	0
NTRK3	0	0	1	1	0	0	1	0	0	1
NUAK2	0	0	0	0	0	0	1	0	0	0
NUDT16-DT	0	0	1	0	0	0	0	0	0	0
NUDT17	1	0	0	0	0	1	1	0	1	0
NUDT19-DT	0	0	1	0	0	0	0	0	0	1
NUDT7	1	0	1	0	1	0	0	0	0	0
NUP153-AS1	0	0	1	0	0	0	1	0	0	0
NUP62CL	1	0	0	0	1	0	1	0	0	0
NUPR1	1	0	1	0	1	0	0	0	0	0
NUSAP1	1	1	1	1	0	0	0	0	0	1
NXN	0	0	0	1	0	0	0	0	0	0
NYAP1	0	1	1	1	1	1	0	0	0	0
OAZ3	0	1	0	0	0	0	0	0	1	1
OGDHL	1	0	0	0	1	0	0	1	0	0
OGFR-AS1	0	0	1	0	0	0	0	0	0	0
OLFM1	0	0	1	0	1	0	0	1	1	0
OLFM2	0	1	0	0	0	0	1	0	0	0
OLFML1	0	0	0	1	0	0	0	0	1	1
OLMALINC	0	0	0	1	1	0	1	0	0	0
OPHN1	0	0	0	0	1	0	1	0	0	0
OR2A1-AS1	0	0	1	0	1	0	0	0	0	0
OR2A9P	0	0	0	1	1	0	0	0	0	0
OR51E1	1	1	1	1	1	0	1	0	1	0
OR7E102P	0	0	0	0	1	0	0	0	0	0
OR7E14P	1	0	1	0	0	0	1	0	0	1
ORC6	1	1	1	1	0	1	1	1	1	1
OSBPL10	1	0	0	0	0	0	0	0	0	0
OSBPL1A	1	0	1	0	1	0	0	1	0	0
OSBPL6	0	0	0	0	1	0	0	0	0	0
OSCAR	0	0	0	0	0	1	0	0	0	1
OTOS	0	0	1	0	0	0	0	0	0	0
OXCT1-AS1	0	0	0	0	1	0	0	1	0	0
OXTR	0	1	1	1	0	1	1	0	1	0
P2RX5-TAX1BP3	0	0	0	0	0	0	1	0	0	0
P2RY6	1	1	1	1	0	1	0	1	1	1
P3H2	0	1	1	0	1	0	1	0	1	1
P3H3	1	1	1	1	0	1	1	0	1	1
P4HA2	0	0	0	1	0	1	0	0	0	1
P4HA3	0	1	1	0	1	0	1	0	1	0
PABPC1P4	1	0	0	0	0	0	0	0	1	0
PABPC3	1	0	0	0	1	0	0	1	1	0
PABPC4L	0	0	1	0	0	1	1	1	1	1
PABPC5	1	0	1	0	1	0	1	0	1	0
PACRG	0	0	0	0	1	0	0	0	0	0
PACSIN1	1	0	1	0	0	0	0	1	1	0
PAIP2B	1	0	0	0	1	0	0	1	0	0
PAK6	1	0	0	0	0	0	0	0	0	0
PALM	0	0	0	1	0	0	1	0	0	0
PALM3	0	1	1	1	0	0	0	0	0	1
PALS2	0	0	1	0	1	0	0	0	0	0
PAMR1	1	0	0	1	0	0	0	0	0	0
PANK1	1	0	0	0	0	0	0	1	0	0
PAOX	0	0	0	1	0	1	1	0	0	1
PAPLN-AS1	1	0	1	1	1	0	0	0	0	0
PAPOLA-DT	1	0	0	0	0	0	1	0	0	0
PAPPA	0	0	1	0	0	0	0	0	1	1
PAPSS2	0	0	1	0	1	0	0	0	1	0
PAQR3	0	0	0	0	0	0	1	1	1	0
PAQR4	1	1	1	0	0	0	1	0	1	0
PAQR6	0	0	0	0	0	1	0	0	1	0
PARD6G-AS1	0	0	0	1	1	0	1	0	0	0
PARGP1	0	0	0	0	1	0	1	0	0	0
PASK	1	1	0	1	0	0	0	0	0	1
PATL2	1	1	1	1	0	0	0	0	1	0
PAX6	0	0	1	0	1	0	0	0	0	0
PAX8-AS1	1	0	0	0	1	0	1	0	1	0
PAX9	1	0	1	1	0	0	1	0	0	1
PAXBP1-AS1	0	0	0	0	1	0	1	0	0	0
PBK	0	1	0	0	0	0	1	0	0	0
PBX4	0	0	1	0	0	0	0	0	0	0
PC	0	1	0	1	0	0	0	0	0	1
PCBP1-AS1	0	0	0	0	1	0	1	0	0	0
PCDH12	0	0	0	1	1	0	1	0	0	0
PCDH17	0	0	0	1	0	0	0	0	1	0
PCDH9	0	0	0	1	0	0	1	0	1	1
PCDHB14	0	1	1	1	1	1	0	0	1	0
PCDHB16	0	0	0	0	1	0	0	0	0	0
PCDHB2	0	0	0	1	0	0	0	0	1	0
PCDHB4	0	1	0	1	0	0	0	0	1	0
PCDHB7	0	0	1	1	1	1	1	0	1	1
PCDHGA10	0	0	0	1	0	0	1	0	1	0
PCDHGA11	1	0	1	0	1	0	0	0	0	0
PCED1B	0	1	1	0	0	1	0	0	1	0
PCLAF	0	0	0	0	0	0	0	1	0	0
PCLO	0	0	0	0	1	0	0	0	0	0
PCMTD1-DT	0	0	1	0	0	0	0	0	0	0
PCNX2	0	1	0	0	0	0	0	0	0	0
PCOLCE2	0	0	0	0	0	0	0	0	1	1
PCSK2	0	0	0	0	0	0	1	0	1	0
PCSK4	0	0	1	1	0	0	0	0	0	0
PCSK6	0	0	1	0	1	0	0	0	1	0
PDCD6IPP2	0	0	0	0	1	0	0	0	0	0
PDE10A	0	0	0	0	1	0	0	0	0	0
PDE1C	0	0	0	0	0	0	0	0	0	1
PDE3B	0	1	0	0	0	0	0	0	1	0
PDE4B	0	0	1	0	1	0	0	0	0	0
PDE4C	1	1	1	1	0	1	1	1	1	0
PDE4D	0	0	1	0	0	0	0	0	0	0
PDE5A	1	1	1	0	0	1	0	1	1	0
PDE9A	0	0	0	0	0	0	0	0	1	0
PDGFA	1	0	0	0	0	0	1	0	0	0
PDLIM3	1	1	1	0	0	0	0	0	1	0
PDLIM4	1	0	0	1	0	0	0	0	0	1
PDLIM7	1	1	1	1	0	1	1	0	1	1
PDPN	1	1	0	0	0	0	1	0	0	1
PDZD2	0	1	1	0	1	0	1	0	1	0
PDZD4	0	0	1	1	1	0	0	0	1	1
PDZD7	1	0	0	0	0	0	0	1	0	0
PEAR1	0	0	0	0	0	0	1	0	1	0
PEG3	0	0	0	0	1	0	0	0	0	0
PELATON	0	0	1	1	0	0	0	0	0	0
PELI1	1	1	1	1	0	1	1	0	1	1
PELI2	0	1	1	0	0	0	0	0	0	0
PFKFB2	1	0	0	0	1	0	0	1	0	0
PGAP4	1	0	0	1	0	0	1	0	1	0
PGBD4	1	0	0	0	1	0	0	0	0	0
PGF	0	0	0	0	1	0	0	0	0	0
PGM5	0	1	0	1	0	0	0	0	0	0
PHEX	1	0	0	1	0	0	0	0	0	1
PHF20L1	0	0	0	0	1	0	1	0	0	0
PHLDA2	0	1	1	0	0	1	0	0	0	0
PHLDA3	1	0	1	1	0	1	1	0	0	0
PHLDB2	1	1	1	1	0	1	1	0	1	0
PHLPP2	1	0	0	0	0	0	0	0	1	0
PHOSPHO2	1	0	0	0	0	0	0	0	0	0
PHYHIP	0	0	0	0	0	0	0	0	0	1
PIANP	0	1	1	1	0	0	0	0	1	1
PICART1	1	0	0	0	0	1	1	0	0	0
PIEZO2	1	0	1	0	1	0	1	0	1	0
PIH1D2	0	0	0	0	1	0	0	0	0	0
PIK3CG	1	1	1	1	0	1	0	0	1	0
PIK3R2	0	0	0	1	0	0	1	0	0	0
PIK3R6	1	1	1	1	0	1	0	0	1	1
PIMREG	0	1	0	0	0	0	0	0	0	1
PIP5KL1	0	1	1	1	0	1	0	0	0	1
PIR	0	0	0	1	1	0	0	0	0	0
PITPNM2	0	0	0	0	1	0	0	0	0	0
PIWIL4	0	0	1	0	0	1	1	0	0	0
PJVK	0	0	0	1	1	0	1	0	0	1
PKD1L1	0	0	0	1	0	0	1	0	0	1
PKDCC	1	1	1	1	1	0	1	0	1	0
PKIA	0	0	0	1	1	0	1	0	0	0
PKIB	1	1	1	0	0	1	0	0	1	1
PKMYT1	1	0	0	0	0	1	0	1	0	0
PKN2-AS1	0	0	0	0	0	0	1	0	0	0
PLA1A	0	0	1	0	0	0	0	0	1	1
PLA2G7	0	1	1	0	1	0	1	0	1	0
PLA2R1	0	0	1	0	1	0	0	0	1	0
PLAC9	0	0	1	1	1	0	0	0	0	0
PLAG1	0	1	0	1	0	1	1	1	1	0
PLAGL1	0	0	0	0	1	0	0	0	0	0
PLAU	1	0	1	1	0	0	0	0	0	0
PLAUR	0	1	0	1	0	1	1	0	0	1
PLB1	0	1	1	1	0	0	0	0	1	0
PLCD3	0	0	1	1	0	1	1	1	0	1
PLCD4	0	0	0	0	1	0	0	0	0	0
PLCH1	0	0	1	0	0	0	0	0	0	0
PLCL1	0	0	1	0	1	0	1	0	0	0
PLCL2	0	1	1	0	0	0	0	0	1	0
PLEKHA6	0	0	0	0	0	1	0	0	0	0
PLEKHA8P1	1	1	0	0	0	1	1	0	1	1
PLEKHD1	1	0	0	0	0	0	0	0	0	0
PLEKHG1	0	1	0	0	0	1	1	0	0	1
PLEKHG2	1	0	0	1	0	1	1	0	1	1
PLEKHG4	0	0	0	1	0	0	0	0	0	0
PLEKHG5	0	1	1	1	0	0	0	0	0	1
PLEKHH1	0	0	0	0	1	0	0	0	0	0
PLEKHH2	1	0	1	0	1	0	1	1	1	0
PLEKHM3	1	0	0	0	0	0	0	0	1	0
PLEKHN1	0	0	0	0	0	1	1	0	0	1
PLK2	1	1	0	1	0	0	1	0	1	1
PLK3	1	1	1	1	0	1	1	0	1	1
PLN	0	0	1	1	1	0	0	0	1	0
PLPP2	1	1	1	1	0	1	1	0	1	0
PLSCR4	0	0	0	0	0	0	0	0	1	0
PLXDC1	1	0	1	1	0	0	1	0	0	0
PLXNA3	0	0	0	0	0	1	0	0	0	0
PLXNC1	1	1	1	1	0	1	0	0	1	1
PLXND1	0	1	0	0	0	0	0	0	0	1
PMAIP1	1	1	1	0	0	1	1	1	1	1
PMEPA1	1	1	1	1	0	1	1	0	0	1
PNMA3	0	0	1	0	0	0	0	0	0	0
PNP	0	0	1	0	0	0	0	0	0	0
POC1B-AS1	0	0	1	0	1	0	0	0	0	0
PODN	1	0	1	1	0	1	0	0	1	1
POLE2	1	0	1	1	0	0	1	1	1	0
POLI	0	0	1	0	0	0	0	0	0	0
POMC	0	0	1	0	0	0	0	0	0	0
PON3	0	0	1	1	0	1	1	0	1	1
POSTN	0	0	0	0	0	0	0	0	1	0
POU2AF1	1	1	1	1	0	0	0	0	1	0
POU2F2	0	1	1	1	0	0	0	0	1	0
POU2F3	0	0	0	0	0	0	0	1	1	1
PPARG	0	0	1	0	0	0	0	0	1	0
PPARGC1A	0	0	0	0	1	0	0	0	0	0
PPEF1	1	0	1	1	0	1	0	0	1	0
PPFIA4	0	0	1	0	0	1	0	0	0	0
PPIC-AS1	1	0	0	0	0	0	1	0	0	0
PPIL6	0	0	0	0	1	0	0	0	0	0
PPM1L	0	0	0	0	1	0	0	0	0	0
PPM1L-DT	0	0	0	0	1	0	0	0	0	0
PPM1N	0	1	0	1	0	0	0	0	1	1
PPP1R12A-AS1	0	0	1	0	1	0	0	0	0	0
PPP1R12B	1	0	1	0	1	0	1	0	1	0
PPP1R14B-AS1	1	1	1	1	0	0	0	0	1	1
PPP1R14BP3	0	1	1	1	0	0	0	0	1	0
PPP1R16B	1	1	1	1	1	0	0	0	1	0
PPP1R1B	0	1	1	1	0	0	1	0	0	1
PPP1R36	0	0	1	0	1	0	0	0	0	0
PPP1R3G	0	1	1	0	0	0	0	0	1	1
PPP2CA-DT	0	0	0	0	1	0	0	0	0	0
PPP2R2B	0	0	0	0	1	0	0	0	0	0
PPP3CB-AS1	1	0	1	1	1	0	1	0	0	0
PRAM1	0	0	1	0	0	0	0	0	1	1
PRDM1	0	1	1	1	0	1	1	0	1	1
PRDM11	0	0	0	0	0	0	1	0	0	0
PRDM16	0	0	0	0	1	0	0	0	0	0
PRDM16-DT	0	0	0	1	1	0	1	0	0	0
PRDM5	1	0	0	0	1	0	1	0	0	0
PRDM6	1	0	0	0	0	0	0	0	1	0
PRDX6-AS1	1	1	1	1	1	0	0	0	1	1
PRECSIT	1	0	1	1	0	1	1	0	1	1
PRELID2	1	0	0	0	1	0	1	0	1	0
PRELID3A	0	0	0	0	0	0	0	0	1	1
PRELP	0	1	0	0	0	0	0	0	0	0
PREX2	0	0	1	0	1	0	0	0	0	0
PRICKLE1	0	0	0	0	0	1	0	0	0	1
PRICKLE2	0	0	1	0	1	0	1	0	1	0
PRKAA2	1	0	0	0	1	0	1	1	0	0
PRKAG2-AS1	0	0	1	0	1	0	0	0	0	0
PRKAR2A-AS1	0	0	0	0	1	0	0	0	0	0
PRKAR2B	1	1	0	0	0	0	0	0	0	0
PRKCA	0	0	1	0	1	0	0	0	0	0
PRKCE	0	0	1	0	1	0	1	0	1	0
PRKCQ	0	0	1	0	1	0	0	0	0	0
PRKCQ-AS1	0	0	1	0	0	0	0	0	0	0
PRKD1	1	0	1	0	1	0	1	0	1	0
PRKG1	0	0	0	0	1	0	0	0	0	0
PRKN	0	0	0	0	1	0	0	0	0	0
PRKX	0	0	1	0	1	0	1	0	1	0
PRMT3	1	0	1	0	1	0	0	0	0	0
PRMT9	0	0	1	0	1	0	1	0	0	0
PROB1	1	0	1	1	0	0	1	0	0	1
PROS1	0	1	0	0	0	0	1	1	0	1
PROX1	0	0	1	0	1	0	0	0	0	0
PRR15	0	1	0	1	0	1	1	0	1	0
PRR19	1	1	1	0	0	1	1	0	1	1
PRR29-AS1	0	0	1	0	1	0	0	0	0	0
PRR36	0	0	1	1	0	0	0	0	1	0
PRR7	1	0	1	1	0	0	0	0	0	1
PRRT2	0	1	0	0	0	0	1	0	0	1
PRRX1	1	1	1	1	0	0	0	0	1	1
PRSS23	1	0	0	0	0	0	0	0	0	0
PRTG	0	0	0	0	1	0	0	0	0	0
PSD	1	0	1	1	0	0	0	0	1	1
PSD3	1	0	1	0	0	1	1	0	1	1
PSMG3-AS1	0	0	1	0	1	0	0	0	0	0
PSORS1C1	0	1	0	0	0	1	1	0	1	0
PTCH1	0	0	1	0	0	0	0	0	0	0
PTCH2	0	0	0	1	0	0	0	0	0	0
PTCHD4	1	1	1	1	0	1	0	0	0	1
PTENP1	0	0	0	0	0	0	0	1	0	0
PTGDS	1	1	1	0	0	1	0	0	0	1
PTGER3	0	0	0	0	0	0	0	0	1	0
PTGIS	0	0	0	1	0	1	0	0	1	1
PTK6	1	0	1	0	0	1	1	0	0	0
PTN	1	1	1	0	0	1	1	0	1	0
PTP4A3	1	1	1	0	0	1	1	0	1	0
[truncated: 880 more rows]

## Sheet: HNSC
id	m0	m1	m2	m3	m4	m5	m6	m7
AAK1	1	0	0	1	1	1	0	1
AARSD1	1	1	1	0	0	0	1	0
AASS	0	0	1	1	0	0	0	0
AATBC	0	0	0	0	0	0	1	0
AATK	1	1	1	0	1	0	1	1
ABAT	0	0	0	0	0	0	0	1
ABCA1	0	0	0	1	0	0	0	0
ABCA11P	0	0	0	0	0	0	0	1
ABCA12	0	0	0	0	0	1	0	0
ABCA3	0	0	0	0	0	0	0	1
ABCA5	1	1	0	0	1	0	1	0
ABCB1	1	1	1	1	1	0	0	1
ABCB4	0	0	0	1	0	0	0	1
ABCB9	0	0	0	0	0	0	1	0
ABCC10	1	1	1	1	1	1	1	1
ABCC4	0	1	0	0	0	0	0	0
ABCC5	1	0	1	0	0	0	1	0
ABCC6	0	0	0	0	0	0	1	1
ABCD1	0	0	0	1	0	0	0	0
ABCG1	1	1	0	1	1	0	0	1
ABHD15	1	0	0	0	1	0	1	1
ABHD3	0	1	0	0	0	0	0	0
ABI3BP	1	0	0	0	1	0	0	1
ABL2	1	1	1	0	1	1	0	0
ABLIM2	1	1	0	1	0	0	0	1
ABLIM3	1	0	0	0	1	1	0	0
ABO	0	0	0	0	0	0	0	1
ABRAXAS1	0	0	0	0	0	0	0	1
ABTB1	1	0	1	0	1	0	0	0
ACACB	1	0	0	0	0	0	0	0
ACAD8	0	0	0	0	0	0	1	0
ACADM	1	0	0	1	0	0	1	0
ACADSB	0	0	0	0	0	0	0	1
ACAP1	0	0	0	1	0	0	0	0
ACAT1	1	1	0	1	0	0	1	0
ACD	1	0	0	0	0	0	0	0
ACHE	1	0	1	1	0	0	1	1
ACKR1	1	1	0	0	0	0	0	0
ACKR3	1	1	1	1	1	1	0	1
ACOT7	0	1	1	0	0	1	0	0
ACOT9	0	0	0	0	0	1	0	0
ACP3	0	0	0	0	1	0	0	0
ACP5	1	0	1	0	0	1	1	0
ACP6	0	0	0	0	0	0	1	0
ACRBP	0	1	0	1	1	0	1	1
ACSM3	0	1	1	1	1	0	1	1
ACTA1	0	0	0	0	1	0	0	0
ACTBP2	1	1	1	1	1	1	0	0
ACTG2	0	0	0	0	0	0	0	1
ACTL6A	1	1	0	0	0	0	0	0
ACTRT3	0	1	0	1	1	0	0	0
ACVR1	1	1	1	0	1	1	0	0
ACVR1C	0	1	0	0	0	0	0	0
ACVR2A	1	0	0	1	1	0	1	0
ACYP1	0	0	0	0	1	0	0	0
ACYP2	0	0	0	0	1	0	0	0
ADA	0	0	0	1	0	0	0	0
ADAM10	1	1	1	0	1	0	0	0
ADAM12	1	1	1	1	1	1	0	0
ADAM19	0	0	0	1	0	0	0	0
ADAM23	0	0	0	0	0	0	0	1
ADAM8	0	1	1	1	0	0	0	0
ADAMTS10	1	0	1	1	1	0	1	1
ADAMTS12	1	1	1	1	1	0	0	0
ADAMTS14	1	0	1	1	1	1	0	0
ADAMTS15	0	0	0	0	0	1	0	0
ADAMTS2	0	0	0	1	1	0	0	0
ADAMTS4	1	0	0	0	0	0	0	0
ADAMTS6	1	0	0	0	0	0	0	0
ADAMTS7	1	0	0	0	0	0	0	0
ADAMTSL2	1	1	0	1	1	0	0	1
ADAMTSL3	1	1	1	1	1	0	0	1
ADAP1	0	0	0	0	0	0	1	0
ADARB1	1	1	1	1	1	1	0	0
ADAT2	0	0	0	0	0	0	1	0
ADCK5	0	0	1	0	0	0	1	0
ADCY10P1	1	1	1	1	1	0	1	1
ADCY3	0	1	0	0	0	0	0	0
ADCY5	0	0	0	0	0	0	1	0
ADCY6	0	0	0	0	0	0	0	1
ADCY7	1	1	1	0	1	0	0	0
ADGRB2	0	0	1	0	0	0	0	0
ADGRD1	0	0	0	0	0	0	0	1
ADGRE1	1	0	0	1	0	1	0	0
ADGRE2	0	0	0	1	0	0	0	0
ADGRG5	0	0	0	1	0	0	0	0
ADGRG6	0	0	0	1	0	1	0	0
ADGRL1-AS1	0	1	0	0	0	0	0	0
ADGRL2	0	0	0	0	0	0	0	1
ADGRV1	1	0	0	0	1	0	0	0
ADHFE1	0	1	1	1	1	0	1	1
ADIRF-AS1	0	1	1	0	1	1	1	0
ADORA1	0	1	0	0	0	0	0	0
ADPGK	0	0	0	1	0	0	0	1
ADPRHL1	0	0	0	0	1	0	0	0
ADRA2C	0	0	0	0	0	0	1	0
ADSS1	0	0	1	0	0	0	0	1
ADTRP	0	1	1	1	0	1	0	0
AEBP1	1	0	0	0	0	0	0	0
AFAP1L1	1	1	1	0	0	1	0	0
AFAP1L2	0	1	1	1	1	1	0	0
AFG3L1P	0	1	1	1	1	0	0	0
AGAP2	0	0	0	1	0	0	0	0
AGAP2-AS1	1	1	0	0	1	1	1	0
AGAP6	1	1	1	1	0	0	0	0
AGAP9	0	0	0	0	0	0	1	0
AGER	1	0	1	1	1	0	0	0
AGFG2	1	1	1	1	1	0	1	1
AGO2	1	1	1	0	0	1	0	1
AGO3	0	1	0	0	0	0	0	0
AGPAT4	1	0	1	0	1	1	0	0
AGRN	0	0	0	0	0	1	0	0
AGT	0	0	0	0	1	0	0	0
AGTRAP	0	0	1	0	1	1	1	0
AHRR	0	0	0	0	0	0	0	1
AHSA2P	0	0	0	0	1	0	0	0
AIF1L	0	0	0	0	1	0	0	0
AIFM3	0	0	0	0	0	0	1	0
AIM2	0	1	1	1	1	1	1	0
AJM1	1	1	1	1	1	0	1	1
AJUBA	0	0	0	0	0	1	0	0
AK9	0	0	0	0	0	0	0	1
AKAP1-DT	0	0	1	1	1	0	1	1
AKAP12	1	0	0	0	0	0	0	0
AKAP5	0	0	0	1	0	0	0	0
AKAP6	0	0	0	0	1	0	0	0
AKT3	1	1	1	1	1	0	1	0
ALDH1A1	1	1	0	1	1	0	1	0
ALDH1A3	0	0	0	0	0	1	0	0
ALDH1L2	0	0	1	1	0	0	0	0
ALDH3A1	0	0	0	0	0	0	0	1
ALDH3B1	0	0	0	1	0	0	0	0
ALDH6A1	0	0	0	0	0	0	0	1
ALG10	0	0	1	1	1	0	0	1
ALG10B	0	1	0	0	0	0	0	0
ALG1L	0	1	0	0	0	0	0	1
ALG3	0	0	0	0	0	0	1	0
ALKBH6	0	0	0	0	0	0	1	0
ALMS1	1	1	1	1	0	0	1	0
ALMS1-IT1	0	0	0	0	0	0	1	0
ALOX12	1	1	1	0	1	0	1	0
ALOX12P2	0	0	0	0	0	0	1	0
ALPK3	1	1	1	1	1	0	0	0
AMIGO1	1	1	1	1	1	0	0	1
AMIGO2	0	0	0	0	0	1	0	0
AMOT	1	1	1	1	1	0	1	1
ANG	1	0	0	0	0	0	0	0
ANGEL1	1	0	1	0	0	0	0	1
ANGPT2	1	1	1	1	0	1	0	0
ANGPTL6	0	0	0	1	0	0	0	0
ANK2	0	0	0	0	1	0	0	0
ANK3	0	0	0	0	0	0	0	1
ANKRD10-IT1	0	0	1	1	1	0	1	1
ANKRD13B	0	1	0	1	1	0	0	1
ANKRD19P	1	1	1	1	0	0	1	1
ANKRD2	1	1	1	0	1	0	1	0
ANKRD29	0	0	0	0	0	1	0	0
ANKRD35	0	0	0	1	0	0	0	0
ANKRD37	0	0	0	1	1	0	1	1
ANKRD42-DT	0	0	0	0	0	0	1	0
ANKRD6	1	1	1	1	1	0	1	1
ANLN	0	1	0	0	0	0	0	0
ANO1	0	0	0	0	0	1	0	0
ANO7	0	1	0	0	0	0	0	1
ANO7L1	0	0	0	0	0	1	0	0
ANTXR2	1	1	0	0	1	1	0	0
ANXA2R	0	0	1	0	1	0	0	0
ANXA9	0	1	1	0	1	0	0	0
AOAH	0	0	0	1	0	0	0	0
AOC2	0	0	1	0	1	0	0	0
AOC3	1	0	0	0	0	0	0	0
AOX1	0	1	1	1	1	0	0	1
AP1G2-AS1	0	0	0	0	0	0	1	0
AP3B2	1	0	1	0	0	0	1	0
AP3M2	0	1	0	0	0	0	0	0
AP5Z1	0	0	0	0	0	0	1	0
APBA2	0	0	0	1	0	0	1	0
APBB1	1	0	0	0	0	0	0	0
APBB2	0	0	0	0	0	1	0	0
APC2	0	1	0	0	0	0	0	0
APLN	0	0	0	0	1	0	0	0
APLP1	1	1	1	1	1	0	1	1
APOBEC3B	0	1	0	0	0	0	0	0
APOBEC3D	0	0	0	1	0	0	0	0
APOBEC3F	0	0	0	1	0	0	0	0
APOBEC3G	1	1	1	0	1	1	1	0
APOBR	0	0	0	1	0	0	0	0
APOC1	1	1	1	0	1	0	1	0
APOD	1	0	0	0	0	0	0	0
APOE	1	0	1	1	1	0	1	0
APOL1	0	0	1	0	1	1	0	0
APOL4	0	0	0	1	0	0	0	0
AQP9	1	0	0	0	0	0	0	0
AR	0	0	0	1	0	0	0	0
ARAP3	1	1	0	1	1	0	0	1
ARFGAP1	0	0	1	0	1	1	0	0
ARFGEF3	1	0	0	0	0	0	0	0
ARG2	0	1	1	0	1	0	0	1
ARHGAP11A	0	1	0	1	0	1	0	1
ARHGAP22	0	0	0	1	0	0	0	0
ARHGAP25	1	0	0	1	1	0	0	0
ARHGAP28	1	1	1	1	1	0	0	1
ARHGAP33	0	1	0	1	1	0	0	0
ARHGAP4	0	0	1	1	1	0	1	1
ARHGAP9	0	0	1	1	0	0	1	0
ARHGEF10L	0	0	0	1	0	0	0	0
ARHGEF25	1	0	0	0	0	0	0	0
ARHGEF39	0	1	0	0	0	0	0	0
ARID3A	1	1	1	0	1	0	1	0
ARID3B	1	1	1	0	1	1	0	1
ARL11	1	0	0	1	0	0	0	0
ARL13B	0	1	0	0	0	0	0	0
ARL6IP6	1	1	1	1	1	0	1	1
ARL9	0	1	1	1	1	0	1	0
ARMC9	1	1	0	1	0	0	1	1
ARNTL	0	1	0	0	0	0	0	0
ARPC1B	1	0	0	0	0	1	0	0
ARPC3P3	0	0	0	0	0	0	1	0
ARRB1	0	0	0	1	0	0	0	0
ARRDC4	0	0	0	0	1	0	0	0
ARSB	1	0	0	0	0	0	0	0
ARSG	0	1	1	1	1	0	1	0
ARSI	0	0	0	0	0	1	0	0
ARSJ	0	0	1	0	0	1	0	0
ARSK	0	1	0	0	0	0	0	0
ARTN	0	0	1	0	0	0	0	0
ASAP1	0	0	1	0	0	0	0	0
ASAP3	1	0	0	0	0	0	0	0
ASB14	1	0	0	1	1	0	1	0
ASB3	0	0	0	0	0	0	1	0
ASCL2	0	0	1	1	1	0	1	0
ASF1B	0	1	0	0	0	0	0	0
ASIC3	0	0	0	1	0	0	0	0
ASMTL-AS1	0	1	1	1	1	0	1	0
ASNS	1	1	1	0	1	0	1	1
ASPHD1	0	0	0	0	0	0	1	0
ASPHD2	0	0	0	0	0	1	0	0
ASPM	0	1	0	0	0	0	0	0
ASPN	0	0	1	1	0	0	0	0
ASPRV1	0	0	0	0	1	0	0	0
ASRGL1	0	1	0	0	0	0	0	0
ASTE1	0	1	1	1	1	0	0	1
ASTN2	0	0	0	0	0	0	0	1
ATAD2	1	0	1	1	0	0	1	0
ATAD3B	0	0	0	0	0	0	1	0
ATAD5	0	1	0	0	0	0	1	1
ATF7-NPFF	0	1	1	1	0	0	0	0
ATF7IP2	1	1	1	1	1	0	0	1
ATL1	1	0	0	0	0	0	0	0
ATOH8	0	0	0	0	1	0	0	0
ATP10B	0	0	0	1	0	1	0	1
ATP13A3	0	1	0	0	0	0	0	0
ATP2A1	0	0	0	0	1	0	0	0
ATP2A1-AS1	0	0	0	0	0	0	1	0
ATP2B1	0	0	1	0	0	0	0	0
ATP6V0E2	0	0	0	0	0	0	1	0
ATP6V0E2-AS1	0	0	0	0	0	0	1	0
ATP6V1C1	0	1	0	0	1	1	1	0
ATP6V1C2	0	1	0	0	0	0	1	1
ATP6V1E2	1	1	0	0	1	0	0	0
ATP6V1FNB	1	0	1	0	1	0	1	1
ATP7B	1	0	0	0	0	0	0	0
ATP8A1	1	0	0	0	1	0	0	0
ATP8A2	0	0	0	1	0	0	0	0
ATP8B2	1	1	1	1	0	0	0	1
ATP8B3	1	0	0	0	0	0	0	0
AUNIP	0	1	0	0	0	0	0	0
AURKA	0	1	0	0	0	0	0	0
AURKB	0	0	1	0	0	0	0	0
AVPR1A	0	0	1	0	0	0	0	0
AXL	1	0	0	0	0	0	0	0
AZIN2	0	1	0	0	0	0	1	0
B3GAT3	0	0	0	0	0	0	1	0
B3GLCT	1	1	1	1	0	0	0	0
B3GNT4	0	0	1	0	0	1	0	0
B3GNT7	0	0	0	0	0	0	0	1
B3GNT9	1	0	0	0	0	0	0	0
B4GALNT1	1	1	1	0	1	0	1	0
B4GALNT4	0	0	0	0	0	0	1	0
B4GALT1-AS1	0	0	0	0	0	0	0	1
BAALC	1	0	0	0	0	0	0	0
BAALC-AS1	0	1	1	1	1	1	1	0
BAG2	1	0	0	0	0	0	0	0
BAIAP2L2	0	0	0	0	0	1	0	0
BANP	0	0	0	0	0	0	1	0
BARX2	0	0	0	0	0	1	0	0
BASP1	0	0	0	1	1	1	0	0
BATF2	0	1	1	1	1	1	0	0
BATF3	0	0	0	1	1	0	0	0
BAZ2B-AS1	0	0	0	0	1	0	0	1
BBC3	0	0	0	0	0	0	1	0
BBOF1	0	0	0	0	0	0	0	1
BBOX1-AS1	0	0	0	0	0	0	1	0
BCAS1	1	1	1	1	1	0	1	0
BCAS4	1	1	0	0	1	0	1	0
BCAT1	0	0	1	0	0	0	0	0
BCKDHB	1	1	0	1	1	0	1	1
BCL11B	0	0	0	0	0	1	0	0
BCL2	1	0	1	0	1	0	1	0
BCL2A1	0	0	0	1	1	0	1	0
BCL2L12	0	0	0	0	0	0	1	0
BCL6B	1	0	0	0	0	0	0	0
BCORL1	1	0	0	0	0	0	0	0
BDNF	1	1	0	0	0	0	0	1
BEND3	0	0	0	0	0	0	0	1
BEND7	1	0	0	0	0	0	0	0
BEX4	0	0	1	1	0	0	0	0
BFSP1	0	0	0	0	0	0	1	0
BGN	1	0	0	0	0	0	0	0
BHLHE40-AS1	0	0	0	1	0	0	0	0
BICC1	0	1	1	1	1	0	0	1
BICD1	0	0	0	0	1	1	0	0
BICDL2	0	0	1	1	1	1	1	1
BID	0	0	0	0	0	0	1	0
BIRC5	0	1	0	0	1	0	0	0
BLACAT1	0	1	0	0	1	0	0	0
BLM	0	1	0	0	0	0	0	0
BLNK	0	0	0	1	0	0	0	0
BLOC1S3	0	0	0	0	0	0	1	0
BMERB1	1	0	0	0	0	0	0	0
BMF	1	0	0	0	0	0	0	0
BMP1	1	0	0	0	0	0	0	0
BMP2	0	0	0	0	1	0	0	0
BMP4	0	0	1	1	1	0	0	1
BMP8B	1	0	0	0	0	0	0	0
BNC1	0	1	1	0	1	1	0	0
BNIPL	0	0	0	0	0	0	0	1
BOC	0	1	0	1	1	0	0	1
BOLA2-SMG1P6	0	1	1	0	1	0	1	0
BOP1	0	1	1	0	1	1	1	0
BORA	0	1	0	0	0	0	0	0
BORCS8-MEF2B	0	1	0	0	0	1	0	0
BRAT1	0	0	0	0	0	0	1	0
BRCA1	0	1	0	0	0	0	0	0
BRCA2	0	1	0	0	0	0	0	0
BRD9	0	0	1	0	0	0	0	0
BRF1	0	1	1	0	1	0	1	0
BRICD5	1	1	1	1	1	0	1	1
BRIP1	0	1	0	0	0	0	0	0
BRSK1	1	0	0	0	0	0	0	0
BST2	0	1	1	1	1	1	0	0
BTBD19	1	0	0	0	0	0	0	0
BTG1-DT	0	0	0	0	0	0	1	0
BTN2A2	0	0	0	1	0	0	0	0
BTN2A3P	1	1	0	0	1	0	0	0
BTN3A1	1	1	1	1	1	1	1	0
BTN3A2	0	1	1	1	0	1	0	0
BTN3A3	0	1	1	0	1	1	0	0
BUB1	0	1	1	1	1	0	1	0
BUB1B	0	0	1	1	0	0	0	0
C10orf143	0	0	0	0	0	0	0	1
C11orf24	0	0	1	0	0	1	0	0
C11orf45	1	1	1	0	1	0	0	0
C12orf75	0	1	1	0	1	1	0	0
C12orf76	0	1	0	0	1	0	1	0
C15orf40	0	0	0	0	1	0	0	1
C15orf48	0	0	0	0	0	1	0	0
C15orf62	0	0	0	0	0	0	0	1
C16orf54	0	0	0	1	0	0	0	0
C16orf74	0	1	1	0	0	1	1	0
C16orf87	1	0	0	0	0	1	0	0
C16orf95	1	0	0	0	0	0	0	0
C17orf49	0	0	0	1	0	0	0	0
C17orf67	0	1	0	1	1	0	1	0
C17orf97	0	0	0	0	0	0	1	0
C18orf54	0	1	1	1	1	0	0	1
C19orf38	1	1	0	1	0	0	1	1
C1orf112	0	1	0	0	0	0	0	0
C1orf115	1	0	1	1	1	0	1	1
C1orf131	0	1	0	0	0	0	0	0
C1orf159	0	0	0	0	0	0	1	0
C1orf216	1	1	1	1	1	0	1	0
C1orf74	0	0	0	0	0	1	0	0
C1QTNF1	0	0	0	0	1	0	0	0
C1QTNF12	0	0	1	0	0	0	0	0
C1QTNF6	1	0	0	1	1	0	0	0
C1RL-AS1	1	0	1	1	1	0	1	1
C2	0	0	1	0	0	0	0	0
C20orf204	0	0	0	1	1	0	1	1
C21orf58	0	0	1	1	0	0	0	0
C22orf46	0	1	0	0	0	0	0	0
C2CD4C	1	0	1	0	0	0	1	0
C2orf16	0	0	0	0	0	1	0	0
C2orf49-DT	1	1	1	0	1	0	1	1
C2orf88	0	0	0	0	0	0	0	1
C3AR1	0	0	0	1	0	1	0	0
C3orf14	0	0	0	0	1	0	1	1
C3orf18	0	0	1	1	0	0	1	0
C3orf52	0	0	0	0	0	1	0	0
C3orf80	1	0	0	0	0	0	0	0
C4orf46	1	0	0	1	0	0	0	0
C4orf48	1	0	0	0	0	0	0	0
C5AR1	1	1	0	0	0	1	0	0
C6orf141	0	0	0	0	0	1	1	0
C9orf40	0	1	1	0	1	0	1	0
C9orf43	1	1	1	1	0	0	0	0
CA13	1	1	1	1	1	0	1	1
CA14	1	0	0	0	0	0	1	0
CA9	0	1	0	0	0	1	1	0
CAB39L	0	0	0	0	0	0	0	1
CABLES1	1	0	1	1	1	0	1	0
CABLES2	0	0	0	0	0	0	1	0
CABYR	0	0	0	0	0	0	1	0
CACNA1A	1	1	0	1	1	0	1	1
CACNA1C	0	0	0	1	0	0	0	0
CACNA1H	1	0	0	0	0	0	0	0
CACNA2D2	1	1	1	1	1	0	1	1
CACNA2D3	0	0	0	0	0	0	1	0
CACNB1	1	1	1	0	1	0	1	0
CAD	0	0	0	0	1	0	0	0
CADM1	1	1	1	0	0	0	1	1
CALD1	1	0	0	0	0	0	0	0
CALHM5	0	0	1	1	1	1	0	0
CALHM6	1	1	0	1	0	0	0	0
CAMK4	0	0	1	0	0	1	0	0
CAMSAP1-DT	1	1	1	0	0	0	0	0
CAP2	0	0	0	0	1	0	0	0
CAPN10-DT	1	0	1	1	0	0	0	1
CAPN12	0	1	0	0	0	0	1	1
CAPN5	0	1	0	0	0	0	0	0
CAPRIN2	1	1	1	1	1	0	1	0
CAPS	0	0	0	0	0	0	1	0
CAPS2	0	0	0	0	0	0	0	1
CARD10	0	1	1	0	1	1	0	0
CARD11	1	0	0	1	1	0	0	1
CARD9	0	0	0	1	0	0	0	0
CARMIL2	1	1	1	0	0	0	1	1
CARMIL3	0	0	0	0	0	0	1	0
CARNS1	0	0	0	0	1	0	0	0
CASC15	1	0	0	0	1	0	0	0
CASK	1	0	0	0	0	0	0	0
CASP8	0	1	0	1	0	1	1	0
CASTOR3	1	0	0	0	1	0	0	1
CATSPER1	0	0	0	1	0	0	0	0
CATSPER2	0	0	1	0	0	0	0	0
CATSPER2P1	1	0	1	0	1	0	0	0
CAV1	0	0	0	0	0	1	0	0
CAVIN2	1	1	0	1	1	0	0	0
CAVIN3	0	0	1	0	1	1	1	0
CAVIN4	1	0	1	1	1	1	0	0
CBARP	0	0	0	0	0	0	1	0
CBLB	1	0	0	0	0	0	0	0
CBLN3	0	0	0	0	0	0	0	1
CBR3-AS1	0	0	1	0	1	0	1	1
CBWD3	0	0	0	0	1	0	0	0
CBWD5	0	1	1	0	1	0	1	0
CBWD6	0	0	0	0	0	0	1	0
CBX2	0	1	1	0	1	0	0	0
CBX7	0	0	1	1	1	0	0	1
CBX8	0	0	0	0	0	0	1	0
CCBE1	1	1	0	0	1	1	0	0
CCDC102A	1	0	1	1	1	0	0	0
CCDC102B	1	1	0	0	0	0	0	1
CCDC125	0	1	0	1	1	0	0	1
CCDC127	0	0	1	0	0	0	1	0
CCDC138	0	1	0	0	0	0	0	0
CCDC14	1	0	0	1	0	0	0	1
CCDC142	0	1	1	1	1	0	1	1
CCDC150	0	1	1	0	1	0	0	0
CCDC153	0	0	0	0	0	0	1	0
CCDC163	1	1	1	1	1	0	0	1
CCDC18	0	0	0	1	0	0	1	1
CCDC18-AS1	1	1	1	1	1	0	1	0
CCDC24	0	0	0	0	0	0	0	1
CCDC34	0	0	0	0	1	0	0	0
CCDC57	0	0	1	1	1	0	0	0
CCDC69	0	0	0	1	0	0	0	0
CCDC77	1	1	1	1	0	0	1	1
CCDC8	1	0	0	0	0	0	0	0
CCDC88A	0	1	0	0	0	0	0	0
CCDC88B	0	0	0	1	0	0	1	0
CCDC9B	1	0	1	0	1	1	0	0
CCL18	0	0	0	1	0	0	0	0
CCL19	1	1	1	1	1	0	1	1
CCL2	0	0	1	1	1	0	0	1
CCL20	0	0	1	0	0	1	1	1
CCL26	0	0	0	0	0	0	1	0
CCL28	1	0	1	0	1	1	1	0
CCL3	1	1	1	0	0	1	0	0
CCL4	1	0	1	0	1	1	0	0
CCL5	1	0	0	0	1	1	0	0
CCM2	0	0	0	0	0	1	0	0
CCN4	1	0	0	0	0	0	0	0
CCNA2	0	1	0	0	0	0	0	0
CCNB1	0	1	0	1	0	1	1	0
CCNB2	0	1	0	0	0	0	0	0
CCNE1	0	1	1	0	0	0	1	0
CCNE2	1	1	0	1	1	0	1	1
CCNF	0	1	0	0	0	0	0	0
CCNJL	0	0	0	0	0	1	0	0
CCNL2	0	0	0	0	0	0	1	0
CCNY-AS1	1	0	1	1	1	0	0	0
CCR1	0	0	0	1	0	0	0	0
CCR5	0	0	0	1	0	0	0	0
CCR7	0	1	0	1	1	0	1	0
CCRL2	0	0	0	1	0	0	0	0
CCSAP	0	1	1	1	1	0	1	1
CCT6B	1	1	1	0	0	0	0	0
CCT6P1	0	0	1	0	1	0	0	0
CCT6P3	1	0	1	0	1	0	0	0
CD101	1	1	1	1	1	1	1	0
CD109	0	0	0	0	0	1	0	0
CD163	0	0	0	1	0	0	0	0
CD163L1	1	1	1	1	1	1	0	1
CD180	0	0	0	1	0	0	0	0
CD247	0	0	0	1	0	0	0	0
CD248	1	0	0	1	1	0	0	0
CD27	1	0	0	0	0	0	0	0
CD274	1	1	1	1	1	1	0	0
CD276	1	0	1	0	0	0	0	0
CD2BP2-DT	1	1	1	1	1	0	1	1
CD300A	0	0	0	1	0	0	0	0
CD300C	0	0	0	0	1	0	0	0
CD300E	0	0	1	1	0	1	0	0
CD300LF	1	1	1	1	1	0	1	0
CD302	0	1	0	0	0	0	0	1
CD36	1	0	0	0	0	1	0	1
CD38	0	0	0	1	0	0	0	0
CD68	1	1	0	1	1	0	0	0
CD7	1	1	0	0	0	0	1	0
CD70	0	0	0	1	0	0	0	0
CD72	0	1	0	1	1	0	0	0
CD79A	0	0	0	1	0	0	0	0
CD84	1	1	0	0	1	0	0	0
CD86	0	1	0	1	0	0	0	0
CD99P1	1	1	1	1	1	0	1	0
CDC20	0	1	1	1	1	0	0	0
CDC20-DT	0	0	0	0	0	0	1	0
CDC20P1	1	1	1	1	1	0	1	0
CDC25A	0	0	0	0	0	0	1	0
CDC25B	0	1	0	0	0	0	0	0
CDC25C	0	1	0	0	0	0	0	0
CDC42EP3	1	0	0	0	0	0	0	0
CDC45	0	1	1	1	0	0	1	0
CDC6	0	1	1	1	1	0	0	0
CDC7	0	1	0	0	0	0	0	0
CDCA2	0	1	0	0	0	0	1	0
CDCA3	0	1	0	0	0	0	0	0
CDCA4	0	0	1	0	1	1	1	0
CDCA5	0	1	0	0	0	0	0	0
CDCA7	0	0	0	0	1	0	0	0
CDCA7L	0	0	1	0	0	0	0	0
CDCA8	0	1	0	1	0	0	0	0
CDH11	1	0	0	0	0	0	0	0
CDH13	0	0	0	0	1	1	0	0
CDH24	0	0	1	0	0	0	0	1
CDH26	1	1	1	1	1	0	1	1
CDH3	0	0	0	0	0	1	0	0
CDH6	0	1	1	1	1	0	0	0
CDHR2	1	1	1	0	1	0	1	0
CDK1	0	1	1	1	0	0	1	0
CDK14	1	0	0	0	0	0	0	0
CDK18	0	0	0	0	0	1	0	0
CDK2	1	1	1	1	1	0	0	0
CDK5R1	0	1	1	0	1	1	0	0
CDK6	0	0	0	0	0	1	0	0
CDKL1	1	1	1	0	1	1	0	0
CDKN2A	0	0	0	0	0	0	1	0
CDKN3	0	1	0	0	0	0	0	0
CDNF	1	0	0	0	0	0	0	0
CDON	1	0	0	0	0	0	0	0
CDPF1P1	1	1	1	0	0	0	0	0
CDR2	1	0	0	0	0	0	0	0
CDR2L	0	0	1	0	0	0	0	0
CDT1	0	0	0	1	0	0	0	0
CDYL2	1	0	1	1	1	1	0	0
CEACAM1	0	0	0	0	1	0	1	1
CEACAM19	0	0	1	0	1	0	0	0
CELF2	1	1	1	1	1	0	0	0
CELSR3	1	1	1	0	1	0	1	0
CEMIP2	1	1	1	1	0	1	0	0
CENATAC	0	0	0	0	0	0	1	0
CENPA	0	1	0	0	0	0	0	0
CENPE	0	1	1	0	1	0	0	0
CENPF	1	1	1	0	1	0	1	1
CENPH	0	1	0	1	0	0	0	0
CENPI	1	1	0	0	0	0	0	0
CENPJ	1	1	1	1	1	0	0	0
CENPK	0	1	0	0	0	0	0	0
CENPL	0	1	0	0	0	0	1	1
CENPM	1	1	0	1	1	0	1	1
CENPN	0	1	0	0	0	0	0	0
CENPO	0	1	0	0	0	0	0	0
CENPP	0	1	0	0	0	0	0	0
CENPQ	0	1	0	0	0	0	0	0
CENPS-CORT	0	0	0	1	1	0	0	1
CENPU	0	0	1	0	1	0	0	1
CENPW	0	0	0	1	0	0	0	0
CEP128	1	0	1	1	1	0	1	1
CEP131	0	0	0	0	0	0	1	0
CEP135	0	1	0	0	0	0	0	0
CEP152	0	1	0	0	0	0	0	0
CEP164	0	1	0	0	0	0	0	0
CEP170	0	1	0	1	1	0	0	1
CEP19	1	1	1	0	1	0	0	0
CEP250	0	1	0	0	0	0	0	0
CEP290	0	1	0	0	0	0	0	0
CEP43	0	1	1	0	1	0	0	1
CEP55	0	1	0	0	0	0	0	0
CEP57L1	1	1	0	0	1	0	0	0
CEP72	0	1	0	0	0	0	0	0
CEP78	0	0	0	0	0	0	0	1
CEP85L	0	0	0	1	0	0	0	0
CEP95	1	1	1	1	1	0	1	1
CEP97	1	1	1	1	1	0	1	1
CERCAM	0	0	1	0	1	1	0	0
CERKL	0	0	0	1	0	0	0	0
CEROX1	0	0	0	0	0	0	1	0
CERS5	0	0	0	1	0	0	0	0
CES1	0	1	0	0	1	0	0	1
CES3	0	0	0	0	0	0	0	1
CETP	0	0	0	1	0	0	1	1
CFAP157	0	1	0	0	0	0	0	0
CFAP251	0	0	1	0	1	0	0	0
CFAP69	1	1	0	0	1	0	0	0
CFAP70	1	0	0	0	0	0	1	0
CFAP73	1	1	0	1	1	0	1	1
CFAP92	1	1	1	0	1	0	1	0
CFD	1	1	0	1	1	0	1	1
CFL2	0	1	0	1	0	0	0	0
CFP	0	0	0	1	0	0	0	0
CGAS	0	1	1	1	1	1	0	0
CGB7	0	0	0	0	0	0	1	0
CGN	0	0	0	0	0	0	1	0
CGREF1	0	0	0	0	0	0	1	0
CH25H	1	0	0	0	0	0	0	0
CHADL	0	0	0	0	0	0	1	0
CHAF1A	0	1	0	1	0	0	0	1
CHAF1B	0	0	0	1	0	0	1	1
CHCHD2P6	0	1	0	0	0	0	0	0
CHEK1	0	0	1	1	1	0	0	0
CHEK2	1	0	1	0	1	0	1	0
CHI3L2	0	0	0	1	0	0	0	0
CHKB	0	1	1	1	0	0	1	0
CHKB-DT	0	0	0	0	0	0	1	0
CHML	1	1	1	1	1	0	0	1
CHN1	0	0	0	1	0	0	0	0
CHORDC1	0	0	1	0	0	0	0	0
CHP1P2	0	1	0	0	0	0	0	0
CHPT1	1	0	0	1	0	0	0	0
CHRD	1	0	1	1	1	0	1	1
CHRNA5	0	1	0	0	0	0	0	0
CHROMR	0	1	0	0	0	0	0	0
CHST1	1	0	0	0	0	0	0	0
CHST11	0	1	0	1	1	1	0	0
CHST12	0	0	0	1	0	0	0	0
CHST14	1	1	0	1	0	0	1	0
CHST15	1	0	0	0	1	0	0	0
CHST2	0	0	0	0	0	1	0	0
CHST3	0	1	1	1	0	0	0	0
CHST7	0	1	1	0	0	0	0	1
CHSY3	1	1	0	1	1	0	0	0
CHTF18	0	0	0	0	0	0	1	0
CIBAR1	1	1	1	1	1	0	1	1
CIP2A	0	1	0	0	0	0	0	0
CIPC	0	0	0	0	0	0	0	1
CIT	0	1	0	1	1	0	0	1
CKAP2	0	1	0	0	0	0	0	0
CKAP2L	0	1	0	0	0	0	0	0
CKLF	1	0	0	0	0	0	0	0
CKS1B	0	1	0	0	0	0	0	0
CKS2	0	1	1	1	0	0	1	0
CLCF1	0	0	0	0	0	1	0	0
CLCN2	0	0	0	0	0	0	1	0
CLCN4	0	1	0	0	0	0	0	0
CLDN11	1	1	1	1	1	0	1	1
CLDN15	0	0	1	1	0	0	1	0
CLDN23	0	0	0	1	0	0	0	0
CLDN4	0	1	0	1	0	0	0	0
CLEC10A	0	0	0	1	0	0	0	0
CLEC11A	1	0	0	0	0	0	0	0
CLEC2D	1	1	1	1	1	0	1	1
CLEC3B	1	0	0	0	0	0	0	0
CLEC4A	0	0	0	1	0	0	0	0
CLEC5A	1	0	1	0	0	1	0	0
CLEC7A	0	0	0	1	0	0	0	0
CLIC3	0	0	1	0	1	0	0	1
CLIC4	1	1	1	1	1	1	0	0
CLIC6	0	1	0	1	0	0	0	0
CLIP3	0	0	1	0	0	0	0	0
CLMP	1	0	1	1	1	1	0	0
CLSPN	1	1	1	0	0	0	0	0
CLSTN3	1	0	0	0	0	0	0	0
CLTRN	0	0	0	0	0	0	1	0
CLU	1	0	0	1	0	0	1	0
CLYBL	0	0	0	0	0	0	0	1
CMAHP	0	0	1	0	1	0	1	1
CMC2	0	1	1	0	1	0	1	0
CMKLR1	0	0	1	0	1	1	0	0
CMPK2	0	0	0	1	0	0	0	0
CMSS1	0	1	0	0	0	0	0	0
CMTM3	0	0	1	1	0	0	0	0
CMYA5	0	0	0	0	1	0	0	0
CNGA1	0	0	1	0	0	0	0	1
CNIH2	1	1	1	0	1	0	1	1
CNIH3	1	0	0	0	0	0	0	0
CNKSR3	0	0	0	0	0	0	0	1
CNNM2	0	1	0	0	0	0	0	0
CNPY4	1	0	0	0	0	0	0	0
CNTLN	1	1	1	0	0	0	1	1
CNTN1	1	1	1	0	0	0	0	0
CNTNAP1	1	0	0	0	0	0	0	0
CNTRL	0	1	0	0	0	0	0	0
COBL	1	0	1	1	1	0	0	0
COL10A1	1	0	0	0	0	0	0	0
COL12A1	0	0	0	1	1	1	0	0
COL13A1	1	0	0	0	0	0	0	0
COL14A1	1	0	0	0	0	0	0	0
COL16A1	0	0	0	0	0	1	0	0
COL1A1	1	0	1	0	0	0	0	0
COL1A2	1	0	0	0	0	0	0	0
COL23A1	0	0	0	1	0	0	0	0
COL27A1	0	1	0	1	1	1	1	0
COL3A1	1	0	0	0	0	0	0	0
COL4A1	1	0	0	0	0	0	0	0
COL4A2	1	0	0	0	0	0	0	0
COL4A5	0	1	1	0	0	0	0	0
COL5A1	0	0	0	0	0	1	0	0
COL5A2	1	0	0	0	0	0	0	0
COL5A3	1	0	1	1	1	1	0	0
COL6A1	1	0	0	0	0	0	0	0
COL6A2	1	0	0	0	0	1	0	0
COL6A3	0	0	1	0	1	1	0	0
COL7A1	0	0	0	0	0	1	0	0
COL8A1	0	1	0	1	0	0	0	1
COL8A2	1	0	0	0	0	0	0	0
COL9A2	0	0	0	0	0	0	1	0
COLGALT1	0	1	0	1	0	1	0	0
COPB2-DT	0	0	1	0	0	0	1	1
COPZ2	0	0	0	0	1	0	0	0
COQ10A	1	0	0	0	0	0	0	0
COQ8A	1	1	1	0	1	0	0	0
CORO7	0	0	1	0	0	0	0	0
COTL1	1	1	1	1	1	0	0	0
COX4I2	1	0	0	0	0	0	0	0
COX7A1	1	0	1	0	1	0	0	0
CPAMD8	1	1	0	0	0	0	0	0
CPEB3	0	0	1	1	1	0	0	1
CPEB4	1	0	0	0	1	0	0	0
CPED1	0	1	0	1	1	0	0	0
CPNE5	0	0	0	1	0	0	0	0
CPNE7	0	0	0	0	0	0	1	0
CPNE8	0	1	0	0	0	0	0	0
CPT1B	0	0	0	0	0	0	1	0
CPT1C	1	1	1	0	1	0	1	1
CPXM1	1	0	0	0	0	0	0	0
CPXM2	0	1	1	1	1	0	0	0
CRACDL	1	1	1	1	1	0	1	1
CRACR2B	0	0	0	0	0	0	1	0
CRAT	1	0	1	1	1	0	1	1
CRISPLD2	1	0	0	0	0	0	0	0
CRMP1	1	0	0	0	0	0	0	0
CROCC	0	1	1	0	0	0	0	0
CROCCP3	0	0	0	1	1	0	0	0
CRY2	1	0	0	0	0	0	0	0
CRYAB	0	0	1	0	1	1	1	1
CRYBB2P1	0	0	0	0	0	0	1	0
CRYGS	0	0	0	0	0	0	1	0
CRYZL2P	0	0	0	0	0	0	0	1
CSF3R	1	0	1	0	1	0	0	1
CSGALNACT2	1	0	0	0	0	0	0	0
CSMD2	1	0	0	0	0	0	0	0
CSPG4	0	0	1	0	1	1	0	0
CSRNP1	0	0	1	0	0	1	0	0
CSRP2	0	0	0	0	0	0	1	0
CTC-338M12.4	0	0	0	0	0	0	1	0
CTH	0	0	1	0	0	0	0	0
CTHRC1	0	0	0	0	0	0	0	1
CTLA4	1	1	1	0	1	0	1	0
CTSC	0	0	0	0	0	1	0	0
CTSK	0	0	0	1	0	0	0	0
CTSL	0	0	0	1	0	0	0	0
CTSV	0	1	1	0	1	1	0	0
CTU1	0	0	1	0	0	0	1	0
CTXN1	0	0	1	0	0	0	0	0
CUTALP	1	0	1	1	0	0	1	1
CXCL10	0	1	1	1	0	0	0	0
CXCL11	0	0	0	1	0	0	0	0
CXCL12	1	0	0	0	0	0	0	0
CXCL13	0	1	1	0	0	0	1	0
CXCL2	0	0	1	0	1	0	0	0
CXCL8	0	0	0	0	0	1	0	0
CXCL9	1	0	0	0	1	0	0	0
CXCR6	0	0	0	1	0	0	0	0
CYB5R2	0	0	0	0	0	0	0	1
CYBB	0	1	0	1	1	0	0	1
CYGB	1	0	0	1	1	0	1	0
CYP26B1	0	1	0	0	1	0	0	0
CYP27A1	1	0	1	1	0	0	0	0
CYP27B1	0	0	1	0	0	0	0	0
CYP2U1	1	0	1	1	1	0	0	0
CYP3A5	1	1	1	1	1	0	1	1
CYREN	0	1	0	0	0	0	0	0
CYRIB	0	0	1	0	0	0	0	0
CYSRT1	0	0	0	0	0	1	0	0
CYTH4	1	0	1	1	1	0	1	0
CYTOR	0	0	1	1	0	0	0	0
DACT1	1	0	0	1	1	1	0	0
DACT3	1	0	0	0	0	0	0	0
DAGLB	0	0	1	0	1	0	0	0
DAPK2	0	1	1	0	1	0	0	1
DARS1-AS1	0	1	1	0	0	1	1	0
DARS2	0	1	1	0	0	0	0	0
DBF4	0	1	0	0	0	0	0	0
DBF4B	1	0	1	1	1	0	1	0
DBNDD1	0	0	0	0	0	0	1	0
DCAF13	0	0	0	0	0	0	1	0
DCAF4	0	0	0	0	0	0	1	0
DCBLD1	0	0	0	0	0	1	0	0
DCBLD2	0	1	1	1	1	1	0	0
DCHS1	1	0	0	0	0	0	0	0
DCLK1	1	0	1	0	1	0	0	0
DCLRE1B	1	0	1	1	1	1	0	0
DCST2	0	0	0	0	0	0	1	0
DDAH1	1	0	0	0	0	0	0	0
DDHD1	1	0	0	0	0	0	1	1
DDIAS	0	1	0	0	0	0	0	0
DDIT3	0	0	0	0	0	0	1	0
DDTL	0	0	1	1	0	0	1	0
DDX11	1	0	0	0	0	0	0	0
DDX12P	1	0	1	0	0	0	1	1
DDX39B	0	0	0	0	0	0	1	0
DDX47	0	0	0	0	0	0	1	0
DDX55	0	1	1	0	1	0	1	0
DDX58	0	0	0	1	1	0	0	0
DDX60	0	1	1	1	1	1	0	0
DDX60L	0	0	0	0	0	1	0	0
DEGS2	0	1	1	0	1	0	1	1
DENND1A	1	1	0	1	1	0	1	0
DENND3	1	1	1	1	1	0	1	0
DEPDC1	0	1	0	0	1	1	0	0
DEPDC1B	0	1	0	1	0	0	0	0
DEPDC7	0	0	0	0	0	1	0	0
DEPTOR	0	0	0	1	0	0	0	0
DERL3	0	1	0	0	1	0	1	1
DGAT2	0	0	1	0	0	1	0	0
DGCR11	0	0	0	0	0	1	0	0
DGCR6	0	0	0	0	0	0	1	0
DGKE	1	1	1	1	1	0	1	1
DGKH	0	0	0	0	0	1	0	1
DGKI	1	1	1	0	1	0	1	1
DGKZP1	1	1	1	1	1	1	1	0
DHRS11	0	0	0	0	0	0	1	0
DHRS9	0	0	0	0	0	0	0	1
DHX58	0	0	0	1	0	0	0	0
DIABLO	0	1	0	0	0	0	0	0
DIAPH3	0	0	1	0	1	1	0	0
DIO2	1	0	0	0	0	0	0	0
DIPK1A	1	1	1	0	0	1	0	0
DISP2	0	0	1	0	1	1	0	0
DLEU2	0	1	0	0	0	0	0	0
DLGAP1-AS2	0	0	0	0	0	0	1	0
DLGAP5	0	0	0	1	0	0	1	0
DLL4	1	0	0	0	0	0	0	0
DLX4	1	0	0	0	1	0	1	0
DLX5	1	1	0	0	1	0	1	1
DMD	0	0	0	0	1	0	0	0
DMTF1	0	1	0	0	0	0	1	0
DMXL2	1	0	0	0	0	0	0	0
DNA2	1	1	1	0	1	0	1	0
DNAAF10	1	1	1	1	1	0	1	0
DNAH1	0	0	0	0	0	0	1	0
DNAH14	0	0	0	0	0	0	1	0
DNAH17	0	0	0	0	0	1	0	0
DNAJB11	0	0	0	0	0	0	1	0
DNAJC2	1	1	1	0	0	0	1	1
DNAJC28	0	0	1	0	1	0	0	0
DNAJC6	1	0	1	0	1	1	0	0
DNAJC9	0	1	0	0	0	0	0	0
DNALI1	1	0	0	0	0	0	0	0
DNASE1	0	0	0	0	0	0	1	0
DNASE1L3	0	0	1	0	1	0	0	0
DNHD1	0	1	1	1	1	0	1	1
DNM1	1	1	1	0	1	0	1	1
DNM3	0	0	0	0	1	0	0	0
DNM3OS	0	0	0	0	1	0	0	0
DNMT1	0	1	0	0	0	0	0	0
DNMT3B	0	0	0	0	0	1	0	0
DOC2B	0	0	1	1	0	0	0	0
DOCK11	1	0	0	0	0	0	0	0
DOCK4	1	0	0	0	0	0	0	0
DOCK5	0	0	0	0	0	1	0	0
DOK1	1	1	0	0	1	0	0	0
DOK2	0	0	0	1	0	0	0	0
DOK3	1	1	1	1	1	0	1	1
DONSON	0	1	1	1	1	0	1	0
DOP1B	1	1	1	1	1	1	0	1
DPF1	1	1	0	0	1	1	0	0
DPH7	0	0	0	1	1	0	1	0
DPY19L1	0	1	1	1	1	0	0	0
DPY19L1P1	0	0	0	0	0	0	1	0
DQX1	0	1	1	0	1	1	1	0
DRAM1	0	0	1	1	1	1	0	0
DRAXIN	0	0	0	0	0	0	0	1
DSCC1	0	1	1	1	0	0	1	0
DSE	1	1	1	1	1	1	0	0
DSG2	1	1	1	0	1	1	0	1
DSN1	0	1	0	0	0	0	0	0
DSTNP2	1	1	1	0	1	0	0	0
DTL	0	1	0	0	0	0	0	0
DTNA	1	0	0	1	1	0	0	0
DTX3	1	1	1	1	1	0	0	1
DTX3L	0	0	0	0	0	1	0	0
DTYMK	0	1	0	0	0	0	1	0
DUBR	0	1	0	0	0	0	0	0
DUOX2	0	1	1	0	0	1	0	1
DUS4L	1	1	1	0	1	0	1	1
DUSP14	0	0	1	0	0	1	0	0
DUSP28	1	1	1	1	1	0	1	1
DUSP9	0	0	0	0	0	0	1	0
DYNLT2	1	1	1	0	0	0	1	1
DYRK3	0	0	0	0	0	1	0	0
DZIP1	0	1	1	0	0	0	1	0
DZIP1L	0	0	0	0	0	0	1	0
E2F1	0	0	0	0	0	0	1	0
E2F3	0	1	0	0	0	0	0	0
E2F5	0	0	1	0	1	0	0	0
E2F7	0	1	0	0	0	0	0	0
EAF2	1	1	1	0	1	0	0	0
EBI3	0	1	1	0	0	0	1	0
ECE2	0	0	0	0	0	0	1	0
ECHDC2	1	1	1	1	1	0	0	1
ECHDC3	0	1	0	0	1	0	1	0
ECT2	0	0	0	0	0	0	1	1
EDARADD	0	1	0	0	0	0	0	0
EDDM13	1	0	1	0	1	0	1	0
EDIL3	1	1	1	0	1	0	0	1
EDNRA	1	0	0	0	0	0	0	0
EDNRB	0	1	0	0	0	0	0	0
EED	0	1	0	1	0	0	0	0
EEF1A2	0	0	0	0	1	0	0	0
EFHD1	1	0	0	0	0	0	0	0
EFNA5	0	0	0	0	0	0	0	1
EFNB1	0	0	1	0	0	0	0	0
EGFL6	1	0	0	0	0	0	0	0
EGFLAM	1	1	1	1	1	0	0	1
EGLN2	0	0	0	1	1	0	0	0
EGLN3	1	1	1	1	0	1	0	0
EHD3	1	0	0	0	1	0	0	1
EHF	0	0	0	0	0	0	0	1
EID2B	0	0	0	0	0	0	1	0
EID3	0	0	0	0	0	0	1	0
EIF2AK2	1	1	0	0	1	1	0	0
EIF3EP1	0	0	0	0	0	1	0	0
EIF4A1	0	0	0	1	0	0	0	0
EIF4A1P2	0	1	1	0	1	0	1	0
EIF4A1P4	0	0	1	0	1	0	1	0
EIF4E3	1	1	1	1	1	1	0	1
EIF4EBP3	0	0	0	0	0	0	0	1
EIF5A2	0	0	0	0	1	0	0	0
ELAPOR1	0	0	0	0	0	0	0	1
ELAPOR2	1	1	0	0	1	0	0	0
ELF3	0	1	0	0	1	0	0	1
ELF4	1	1	0	0	0	0	0	0
ELFN1	0	0	0	0	0	0	1	0
ELN	0	1	1	0	1	0	0	1
ELOA-AS1	0	0	0	0	1	0	0	0
ELOVL4	0	0	0	0	0	0	0	1
ELOVL6	0	1	0	0	0	0	0	0
EMC1	0	1	1	0	0	0	0	0
EMC3-AS1	0	1	0	0	0	0	0	0
EMCN	1	1	1	1	0	0	0	1
EME1	0	0	0	1	1	0	1	0
EMILIN1	1	0	1	1	1	0	0	1
EMILIN2	0	0	0	0	0	0	1	0
EML6	1	0	0	0	0	0	1	0
EMP1	0	0	0	0	0	0	0	1
EMP3	1	1	1	1	1	1	1	0
EMSLR	0	1	0	0	0	0	0	0
ENAH	0	0	0	0	0	1	0	0
ENGASE	0	0	0	0	0	0	1	0
ENO2	0	0	0	0	0	0	1	0
ENO3	0	0	0	0	1	0	1	0
ENPEP	1	1	0	1	1	1	0	0
ENTPD1	0	0	0	1	0	0	0	0
ENTPD3-AS1	0	0	0	0	0	0	1	0
ENTPD7	0	1	1	1	1	0	0	0
ENTR1	0	1	0	0	0	0	0	0
EP400P1	1	1	1	1	1	0	0	1
EPB41L3	1	0	0	0	0	0	0	0
EPB41L4A	1	1	1	1	1	0	1	1
EPB41L4B	0	1	0	0	1	1	1	1
EPCAM	0	0	1	0	1	0	1	1
EPHB1	1	1	1	0	1	0	1	1
EPHB2	0	0	0	0	0	1	0	0
EPHB6	0	0	0	1	0	0	0	0
EPHX2	0	1	0	0	1	0	0	0
EPHX3	0	1	1	1	0	0	0	1
EPM2A	1	0	0	0	1	0	1	0
EPOP	1	0	1	0	0	0	1	0
EPOR	1	1	1	1	0	0	0	0
EPPK1	0	1	1	0	0	0	0	0
EPS8L1	0	0	0	0	1	0	0	0
EPSTI1	0	0	0	1	0	0	0	0
ERCC6L	0	1	1	1	1	0	0	0
ERF	0	1	0	0	0	0	0	0
ERICD	1	1	1	1	1	0	1	1
ERICH6-AS1	1	1	0	0	1	0	1	0
ESCO2	0	1	0	0	0	0	0	0
ETFDH	0	1	0	0	1	0	0	0
ETS1	0	0	0	1	0	0	0	0
ETV1	1	0	0	0	0	0	0	0
ETV2	0	0	0	0	0	0	1	0
ETV4	0	0	0	0	0	0	1	0
ETV5	0	1	0	0	0	0	0	0
ETV7	0	0	1	1	1	0	1	0
EVA1A	0	0	0	0	0	1	0	0
EVA1B	1	0	0	0	0	0	0	0
EVA1C	0	0	0	0	0	0	0	1
EXO1	0	1	1	1	1	0	1	1
EXO5	0	0	1	1	0	0	0	0
EXOG	1	1	1	1	1	0	0	1
EXOSC10-AS1	0	0	1	0	1	0	1	0
EXOSC2	0	0	0	0	0	0	1	0
EXPH5	1	1	1	0	1	0	0	1
EXT1	0	0	0	0	0	1	0	0
EXTL2	1	0	0	0	0	0	0	0
EXTL3	0	0	0	0	0	1	0	0
EYA2	1	1	1	1	1	0	1	1
EZH2	1	1	1	1	1	0	1	1
F2R	1	0	0	0	0	0	0	0
F8	1	0	0	0	0	0	0	0
FAAH2	0	1	1	1	0	0	1	0
FAAP20	0	0	1	0	0	0	0	0
FAAP24	0	1	0	0	0	0	0	0
FABP3	1	1	1	1	1	0	1	0
FABP5P7	0	0	1	0	1	1	0	0
FADD	0	0	0	0	0	1	0	0
FADS1	0	1	0	0	0	0	0	0
FADS2	0	1	0	1	1	0	0	1
FADS3	0	0	0	0	0	1	0	0
FAM107A	1	1	1	1	0	0	1	0
FAM110B	1	0	0	0	1	0	0	1
FAM110D	1	0	0	0	0	0	0	0
FAM111A	0	1	0	0	0	0	0	0
FAM111B	0	1	1	0	0	0	1	1
FAM131A	0	0	1	0	0	0	1	0
FAM151B-DT	0	0	0	0	0	0	1	0
FAM161A	0	1	1	0	1	0	1	0
FAM167B	1	0	0	0	0	0	0	0
FAM169A	0	1	1	1	1	1	0	0
FAM171A1	0	0	0	0	0	0	0	1
FAM171A2	1	0	0	0	0	0	1	0
FAM174B	0	0	0	0	1	0	1	0
FAM177B	0	1	0	1	0	0	0	1
FAM214A	0	1	1	1	1	0	0	1
FAM219A	0	0	1	0	0	0	1	0
FAM229A	0	0	0	0	0	0	1	0
FAM234B	0	1	0	0	0	0	0	0
FAM71F2	0	0	0	0	0	0	1	0
FAM72A	0	1	1	1	0	0	0	0
FAM76B	1	1	1	1	1	0	1	1
FAM83A	0	0	1	0	1	1	0	0
FAM86C1P	0	1	1	0	0	0	0	0
FAM86JP	0	0	0	0	0	0	1	0
FAM89A	0	0	0	0	0	1	0	0
FAM91A1	0	1	0	0	0	0	0	0
FANCA	1	0	0	0	0	0	0	0
FANCB	0	1	0	0	0	0	0	0
FANCC	1	0	1	1	0	0	1	1
FANCD2	0	1	0	0	0	0	0	0
FANCE	0	1	0	0	0	0	0	0
FANCG	0	1	0	0	1	0	0	0
FANCI	0	1	0	0	0	0	0	0
FANCM	1	1	1	1	1	1	1	1
FAP	1	0	1	0	1	1	0	0
FASTKD3	0	0	0	0	0	0	0	1
FAT1	1	1	1	1	1	1	0	0
FAXDC2	0	1	1	0	0	0	0	0
FBLIM1	0	0	1	0	1	1	0	0
FBLN7	1	0	0	0	0	0	0	0
FBN1	1	1	1	1	1	0	0	1
FBN2	1	0	1	0	0	0	0	0
FBXL16	0	0	0	0	0	0	1	0
FBXL17	0	0	1	0	0	0	0	1
FBXL18	0	1	0	0	0	0	0	0
FBXL2	0	0	0	0	0	1	0	0
FBXL22	0	0	0	0	0	0	0	1
FBXL6	0	1	0	0	0	0	0	0
FBXO17	0	0	0	0	0	0	1	0
FBXO2	0	0	0	0	0	1	0	0
FBXO39	0	1	0	0	0	1	0	0
FBXO41	1	0	0	0	0	0	1	1
FBXO45	0	1	0	0	1	1	0	0
FBXO5	1	1	1	1	0	0	1	0
FBXW4P1	0	0	1	0	0	0	0	0
FCER1G	1	0	0	1	0	0	0	0
FCGBP	0	0	0	0	0	0	0	1
FCGR2A	1	1	0	1	1	0	0	0
FCGR3A	0	0	0	1	0	0	0	0
FCHO1	1	0	1	0	0	0	1	1
FCHO2	0	0	0	1	0	0	0	0
FCN3	1	1	1	0	1	0	1	0
FCRLB	0	0	0	0	0	0	1	0
FDX2	0	0	0	0	0	0	1	0
FEM1A	1	1	1	1	1	0	1	1
FEN1	0	1	1	1	1	0	1	0
FER1L4	0	0	0	0	0	0	1	0
FERMT1	0	0	0	0	0	1	0	0
FEZ1	0	1	0	0	0	0	0	0
FFAR2	0	0	0	0	0	1	0	0
FGD6	1	1	1	1	1	1	0	0
FGFR4	0	1	1	0	1	0	1	0
FHL1	0	0	0	0	1	0	0	0
FHOD1	0	0	1	0	1	1	0	0
FHOD3	0	1	0	0	0	0	0	0
FILIP1	1	1	1	1	1	0	0	1
FJX1	0	0	0	0	0	1	0	0
FKBP10	1	0	0	0	0	0	0	0
FKBP14	1	0	0	0	0	0	0	0
FKBP1C	0	1	1	1	1	1	1	0
FKBP9	1	0	0	0	0	0	0	0
FKBP9P1	1	1	1	0	1	0	0	0
FLCN	1	1	0	0	0	0	0	1
FLNC	0	0	0	0	0	1	0	0
FLRT2	0	0	0	0	0	1	0	0
FLT1	1	0	1	0	0	0	0	0
FLT3LG	0	0	0	1	0	0	0	0
FLT4	1	0	0	0	0	0	0	0
FLVCR1	0	1	0	0	0	0	0	0
FLYWCH1	1	1	0	1	1	0	1	0
FMN1	1	1	1	1	1	1	0	1
FMNL1-DT	0	0	0	1	0	0	0	0
FMNL2	0	0	0	0	0	1	0	0
FMNL3	1	0	0	0	0	0	0	0
FMO1	1	0	0	0	0	0	0	0
FN1	1	1	1	1	1	1	0	0
FN3K	1	1	1	1	1	0	1	1
FNDC1	1	1	0	0	0	0	0	0
FNDC11	0	0	0	0	0	0	1	0
FNDC3B	0	0	1	0	0	0	0	0
FNDC4	1	0	0	0	0	0	0	0
FOSB	0	0	0	0	0	0	0	1
FOXD1	0	1	1	0	1	1	0	0
FOXD2	0	1	0	1	0	0	1	0
FOXD2-AS1	1	0	0	0	1	0	0	0
FOXF2	0	0	0	1	1	1	0	0
FOXK1	1	1	1	0	1	1	0	1
FOXL1	1	1	1	1	1	1	1	0
FOXM1	0	1	0	1	0	1	0	0
FOXN2	0	1	0	0	0	0	0	0
FOXO4	0	0	0	0	0	0	0	1
FOXP3	0	0	0	1	0	0	0	0
FOXRED2	0	1	0	0	0	0	0	0
FPR3	0	0	0	1	0	0	0	0
FRMD3	0	0	0	0	1	0	0	0
FRMD6-AS1	0	0	0	0	0	0	0	1
FRRS1	0	1	1	1	0	1	0	1
FRY	0	0	1	1	1	0	0	1
FRZB	1	1	1	1	1	0	1	1
FSCN1	0	0	0	0	0	1	0	0
FST	1	1	0	0	1	1	0	0
FSTL3	1	0	1	0	1	1	0	0
FTH1P11	1	0	0	0	0	0	0	0
FTH1P16	1	0	1	0	1	0	0	0
FTH1P2	0	0	1	0	0	0	0	0
FTH1P20	1	1	1	1	1	0	1	0
FTH1P23	0	1	0	1	1	0	1	0
FTH1P3	0	0	1	0	0	0	0	0
FTH1P7	0	0	1	0	0	0	0	0
FTH1P8	1	0	1	0	1	0	1	0
FTLP3	1	1	1	1	0	0	1	0
FUT1	0	1	0	0	0	1	1	1
FUT2	0	0	0	0	0	0	0	1
FXYD5	0	0	1	1	1	1	0	0
FYB1	0	0	0	1	0	0	0	0
FYCO1	0	1	1	0	0	1	0	1
FYN	1	1	1	1	1	0	0	1
FZD2	1	0	0	0	0	0	0	0
FZD4	1	0	0	0	0	0	0	0
FZD6	0	1	0	0	0	0	0	0
G2E3	0	1	0	0	0	0	0	0
GABBR1	0	0	0	0	0	0	1	0
GABPB1-AS1	0	1	1	1	0	0	1	1
GABRE	0	0	0	0	0	0	1	0
GADD45G	1	0	1	1	0	0	0	0
GALNS	0	0	1	0	0	0	0	0
GALNT10	1	0	0	0	1	1	0	0
GALNT12	1	1	1	1	1	0	1	1
GALNT17	1	0	0	0	0	0	0	0
GALNT18	1	1	1	0	1	1	0	0
GALNT2	0	0	1	1	0	0	0	0
GALNT5	0	0	0	0	0	0	0	1
GALNT6	0	0	1	0	1	0	0	0
GAMT	0	0	0	0	0	0	1	0
GAPDHP63	0	1	1	0	1	0	1	0
GAREM2	1	1	1	1	1	0	1	0
GARS1-DT	0	0	0	0	0	0	1	0
GAS2L3	0	1	0	0	0	0	0	0
GAS7	1	0	0	0	0	0	0	0
GASAL1	0	0	0	0	0	1	0	0
GASK1B	1	1	1	1	0	0	0	1
GATA2	1	0	0	0	0	0	0	0
GATA2-AS1	1	0	0	0	0	0	1	0
GATA6	1	0	0	0	0	0	0	0
GATM	0	0	0	0	0	0	0	1
GBAP1	0	0	0	0	0	0	1	0
GBP1	0	1	0	0	0	0	0	0
GBP1P1	0	1	1	0	0	1	0	0
GBP5	0	1	0	1	1	1	0	0
GBP6	0	0	0	0	0	0	0	1
GCNA	0	0	0	0	0	0	1	0
GCSAM	0	1	0	0	1	0	1	0
GDF11	1	1	0	1	0	0	1	1
GDPD3	0	0	0	0	0	0	1	0
GEMIN2	0	1	0	0	0	0	0	0
GEN1	1	1	1	1	1	0	1	1
GFI1	0	0	0	1	0	0	0	0
GFPT2	1	1	1	1	1	0	0	0
GGH	0	0	1	0	0	0	1	0
GGN	1	1	1	0	1	1	0	0
GGT1	0	0	0	0	0	0	1	0
GGT5	1	0	1	1	1	0	0	0
GGTA1	1	1	0	0	1	0	0	1
GHR	1	1	1	1	1	0	0	1
GINS1	0	1	0	0	0	0	0	0
GINS2	0	1	0	0	0	0	1	0
GINS3	0	1	0	0	0	0	0	0
GINS4	0	1	0	0	0	0	0	0
GIPC2	1	0	0	1	0	0	1	0
GIPC3	1	0	1	1	1	0	0	1
GIPR	0	0	1	1	1	0	1	0
GJC1	1	0	0	0	0	0	0	0
GK	0	0	0	0	0	0	0	1
GLI1	1	0	0	0	0	0	0	0
GLI2	1	0	0	0	0	0	0	0
GLI3	0	0	0	0	0	1	0	0
GLI4	0	0	0	0	0	0	1	0
GLIPR1	1	0	0	1	1	1	0	0
GLIS1	1	0	0	0	0	0	0	0
GLIS2	1	1	1	1	1	0	0	1
GLS	1	1	0	0	1	0	0	0
GLT8D2	1	0	0	0	0	0	0	0
GMDS	0	0	0	0	0	0	1	0
GMNN	0	1	0	0	0	0	0	0
GMPR	1	0	1	1	1	0	0	0
GMPS	0	0	0	0	0	0	0	1
GNA12	0	0	0	0	0	1	0	0
GNAI1	0	1	1	0	0	1	0	0
GNAL	1	1	1	1	1	0	1	0
GNAO1	1	1	0	0	1	0	0	1
GNB1L	1	1	1	0	1	0	1	0
GNB4	0	1	1	0	0	0	0	0
GNB5	0	0	0	0	1	0	0	0
GNE	0	0	0	0	0	0	0	1
GNG7	1	1	1	1	1	0	0	1
GNGT2	1	1	0	1	0	0	1	0
GNLY	1	1	1	0	1	1	1	0
GOLGA2P5	0	1	0	0	1	0	1	0
GOLGA7B	0	0	0	0	0	1	0	0
GOLGA8A	0	0	0	0	1	0	1	0
GOLGA8B	0	0	0	0	0	0	1	0
GOLIM4	1	1	1	0	1	0	0	0
GORAB	0	1	0	0	0	0	0	0
GPAT3	0	1	0	1	0	0	0	0
GPATCH2	1	1	0	0	1	0	1	1
GPC2	0	0	0	0	0	0	1	0
GPC6	0	1	1	1	1	0	0	0
GPD1	0	0	0	0	1	0	0	0
GPD1L	0	0	0	0	1	0	0	0
GPER1	0	1	0	0	0	0	1	0
GPR132	0	0	0	1	0	0	0	0
GPR135	0	0	0	0	0	0	1	0
GPR153	0	0	0	0	0	1	0	0
GPR161	1	0	1	0	0	0	1	0
GPR173	1	0	0	0	0	0	0	0
GPR176	1	1	1	0	1	1	0	0
GPR180	0	1	0	0	0	0	0	0
GPR199P	1	0	0	1	0	0	0	0
GPR3	1	0	0	0	1	0	0	0
GPR39	0	1	0	1	1	1	0	0
GPR4	1	0	0	0	0	0	0	0
GPR68	0	0	1	1	1	1	0	0
GPR84	0	0	0	1	0	0	0	0
GPR89A	0	0	1	0	0	0	0	0
GPR89B	0	0	1	0	0	0	0	1
GPRASP2	0	0	0	0	0	0	0	1
GPRC5B	1	0	0	0	0	0	0	0
GPRIN1	0	0	0	0	0	1	0	0
GPRIN3	0	0	1	0	1	0	0	0
GPS2	0	0	1	1	1	0	0	0
GPSM1	1	0	0	0	1	0	1	0
GPT	1	0	1	1	1	0	1	0
GPT2	1	1	1	0	0	0	1	1
GPX3	1	1	0	1	1	0	0	1
GPX7	1	1	1	1	1	0	1	0
GPX8	1	1	1	1	1	1	0	0
GRAMD1C	0	0	0	0	1	0	0	0
GRAMD2B	0	0	0	0	0	0	0	1
GREM1	1	0	0	0	0	0	0	0
GRHL1	0	0	0	0	0	0	0	1
GRIN2D	0	1	0	0	0	0	1	0
GRK3	0	0	0	1	0	0	0	0
GRK4	0	0	1	0	0	0	1	0
GSAP	1	1	0	0	0	0	0	1
GSDMB	0	0	0	0	0	0	1	0
GSDMD	1	0	0	1	1	0	1	0
GSDME	0	0	0	0	0	1	0	0
GSEC	1	1	1	0	0	0	1	0
GSK3B-DT	1	1	1	1	0	0	1	0
GTDC1	1	1	1	1	1	0	1	1
GTF2E1	1	1	0	1	1	0	1	0
GTF2H4	1	1	1	0	0	0	1	0
GTF2IP20	0	1	0	0	0	0	1	1
GTF2IRD2	0	0	0	0	0	0	1	0
GTF2IRD2B	0	0	0	0	0	0	1	0
GTF2IRD2P1	0	0	0	0	0	0	1	0
GTF3C2-AS2	0	0	1	0	1	0	0	1
GTSE1	0	1	0	0	0	0	0	0
GTSE1-DT	1	1	1	0	0	0	1	0
GUCY1A1	1	0	0	0	0	0	0	0
GUCY1A2	1	0	0	0	0	0	0	0
GUCY1B1	1	0	0	0	0	0	0	0
GULP1	1	0	1	1	1	0	0	0
GUSBP1	0	0	0	0	0	0	1	0
GUSBP18	1	0	1	1	1	0	0	1
GYPC	0	0	1	0	1	0	0	1
GZMA	1	1	1	1	0	1	1	0
GZMB	0	1	1	1	1	1	1	0
H1-10-AS1	0	0	1	1	0	0	0	1
H2AC11	0	1	0	0	1	1	0	0
H2AC20	0	0	0	0	0	0	1	0
H2BC11	0	1	1	0	0	0	1	0
H2BC12	0	1	0	0	0	0	0	0
H2BC15	0	0	0	0	0	0	1	0
H2BC18	0	0	0	0	0	0	1	0
H2BC20P	0	0	0	0	0	0	1	0
H2BC4	0	0	1	0	1	1	0	0
H2BC5	0	0	0	0	1	1	1	0
H2BC8	0	0	0	0	0	1	0	0
H3C10	0	1	0	0	0	0	0	0
H4-16	0	0	0	0	0	0	0	1
H4C8	1	1	1	0	0	1	0	0
H4C9	0	1	0	0	1	0	1	0
HAAO	1	1	0	1	1	0	1	1
HAGHL	0	0	0	0	0	0	1	0
HAGLR	1	1	1	1	1	0	0	1
HAP1	1	1	1	0	1	0	1	1
HAPLN3	0	0	0	1	0	0	0	0
HAS2	1	0	0	0	0	1	0	0
HAS3	0	1	0	0	0	1	0	0
HASPIN	0	0	0	0	0	0	1	0
HAUS6	1	1	1	1	1	1	0	0
HAUS7	0	0	0	0	0	0	1	0
HAUS8	0	0	0	0	1	0	0	0
HAVCR2	0	1	0	1	1	1	0	0
HCP5	0	0	0	0	0	1	0	0
HDAC10	1	1	1	0	1	0	0	0
HDGFL3	0	1	0	0	0	0	0	0
HDX	1	0	0	1	0	0	0	1
HEATR6	1	1	1	1	1	1	0	0
HEATR6-DT	0	0	1	0	1	0	0	0
HELB	0	1	0	0	0	0	0	0
HELLPAR	1	1	0	1	1	0	1	1
HELLS	1	0	0	1	1	0	1	1
HELZ2	0	1	0	0	1	1	0	0
HENMT1	0	0	0	0	1	0	0	0
HEPH	0	0	0	0	1	0	0	1
HERC2P2	1	0	0	0	1	0	0	0
HERC5	0	0	0	1	0	0	0	0
HES2	0	0	0	0	0	1	0	0
HES4	0	0	0	0	1	0	1	0
HES6	0	0	0	0	0	0	1	0
HEXA	0	0	1	0	1	1	0	0
HEY1	1	0	0	0	0	0	0	0
HEYL	0	1	0	0	0	0	0	0
HHIPL1	1	0	0	1	1	0	1	1
HIC1	1	0	0	0	0	0	0	0
HID1	0	0	0	1	0	0	1	1
HIGD1B	0	1	0	1	1	0	1	0
HIP1	0	1	0	1	0	0	0	1
HJURP	0	1	1	1	0	0	1	1
HK2-DT	0	0	0	0	0	0	1	0
HK3	1	0	0	1	0	0	0	0
HLA-DOB	0	1	0	0	1	0	0	1
HLA-F	0	0	0	1	1	0	1	0
HLA-F-AS1	0	0	0	0	0	0	1	0
HLA-G	0	1	1	1	1	1	0	0
HLA-J	0	1	1	1	0	1	1	0
HLA-K	0	1	0	1	1	0	1	0
HLA-L	0	1	1	0	0	1	1	0
HLF	0	1	0	0	0	0	0	0
HLTF	1	1	1	1	1	0	1	1
HLX	1	0	1	1	1	0	1	0
HMGB3	0	0	0	0	0	0	1	0
HMGN2P3	0	1	0	0	0	0	0	0
HMGN2P5	0	0	0	1	1	0	0	0
HMGN5	0	0	0	0	0	0	0	1
HMMR	0	1	0	1	1	0	1	0
HNMT	1	1	1	1	1	0	0	1
HNRNPA1P21	0	0	0	1	0	0	0	0
HNRNPA3P5	0	0	1	0	0	0	0	0
HNRNPCP1	0	0	1	0	0	0	0	0
HNRNPLP2	0	0	1	0	0	0	0	0
HOMER2	0	0	0	0	1	1	0	0
HOMER3	0	0	0	0	0	1	0	0
HOPX	0	0	1	1	1	1	0	1
HOTAIRM1	0	1	1	0	1	0	1	0
HOXB7	0	0	0	0	0	0	1	0
HOXD8	1	1	0	1	0	0	0	0
HOXD9	1	1	1	1	1	1	1	0
HPCA	0	0	1	0	1	0	1	0
HPGD	0	0	0	0	0	0	0	1
HPS3	0	1	0	0	0	0	0	0
HROB	0	1	0	0	0	0	0	0
HS1BP3	1	0	1	0	1	0	1	0
HS3ST1	0	1	1	1	1	1	0	1
HSD11B2	1	0	0	0	1	0	0	0
HSD17B1	0	0	1	0	1	0	0	0
HSD17B14	0	0	0	1	0	0	0	0
HSD17B6	1	1	1	0	1	0	1	1
HSF2BP	1	1	1	0	1	0	1	1
HSF4	0	0	0	0	0	0	1	0
HSH2D	0	0	0	1	0	0	0	0
HSP90AB2P	0	0	1	0	0	0	0	0
HSP90AB3P	1	1	1	0	1	1	1	0
HSP90B2P	0	1	0	0	1	0	1	0
HSPA12A	1	0	0	0	1	1	0	0
HSPA13	0	0	0	0	1	0	0	0
HSPB6	0	0	0	0	1	0	0	0
HSPB8	0	0	0	0	1	0	0	0
HSPBAP1	0	0	0	0	0	0	1	0
HTR7	0	1	0	0	1	1	0	0
HTRA1	1	0	1	0	0	0	0	0
HTRA3	0	0	1	1	0	0	0	0
HVCN1	1	1	1	0	1	0	1	0
HYKK	1	1	1	1	1	0	1	0
HYLS1	0	1	0	0	0	0	0	0
HYPK	0	0	0	1	0	0	0	0
ICA1	1	1	1	1	1	0	1	1
ICA1L	0	0	0	0	0	0	0	1
ICAM1	0	0	0	1	0	0	0	0
ICAM5	0	1	1	0	0	0	0	0
ICOS	0	0	0	1	0	0	0	0
ID4	1	0	0	0	0	0	0	0
IDO1	0	1	0	0	1	1	1	0
IER5L	1	1	1	1	1	0	1	0
IFI27	0	0	0	0	0	1	0	0
IFI27L1	0	1	1	1	1	0	1	0
IFI30	0	1	0	1	0	0	0	0
IFI35	0	1	0	0	1	0	0	0
IFI44	0	0	0	0	0	1	0	0
IFI44L	0	1	1	1	1	1	0	0
IFI6	0	0	0	0	0	1	0	0
IFIH1	0	0	0	0	0	1	0	0
IFIT1	0	1	1	0	1	0	0	0
IFIT2	0	0	0	1	0	0	0	0
IFIT3	0	0	0	1	0	0	0	0
IFNAR2	0	0	0	1	0	0	0	0
IFNLR1	0	0	1	0	0	0	0	0
IFT122	1	1	1	1	1	0	1	1
IFT80	0	0	1	0	0	0	0	0
IGF1R	0	1	0	0	0	0	0	0
IGF2BP2	0	0	1	0	0	1	0	0
IGFBP3	1	0	0	0	0	0	0	0
IGFLR1	0	1	0	0	1	0	1	0
IGHG1	1	1	1	1	1	0	1	0
IGHG2	0	0	0	1	0	0	0	0
IGHG3	1	1	1	1	1	0	1	1
IGHG4	0	0	0	1	0	0	0	0
IGHGP	1	1	1	0	1	0	0	1
IGHM	0	0	0	1	0	0	0	0
IGSF6	0	0	0	1	0	0	0	0
IGSF9	0	0	0	0	0	0	1	0
IKBIP	0	1	1	0	0	0	0	0
IKBKG	0	1	0	0	0	0	0	0
IKZF2	0	0	0	0	0	0	0	1
IKZF3	0	0	0	1	0	0	0	0
IL12RB1	0	0	0	1	0	0	0	0
IL12RB2	0	0	1	1	1	1	0	0
IL15	0	0	0	1	0	0	0	0
IL15RA	0	0	0	0	1	0	0	0
IL17RD	0	0	0	0	1	0	1	1
IL18BP	0	0	0	1	0	0	0	0
IL18R1	1	1	1	0	0	0	1	0
IL1A	0	0	0	0	0	1	0	0
IL1B	0	1	1	0	0	0	0	0
IL1R2	1	1	1	1	1	1	0	0
IL1RAP	0	0	0	0	0	1	0	0
IL1RL1	0	0	0	0	0	1	0	0
IL20RA	0	0	0	0	0	0	0	1
IL21R	1	1	1	1	1	0	1	1
IL23A	0	0	0	0	0	1	0	0
IL24	0	1	1	0	0	0	0	0
IL27RA	1	1	1	1	1	1	1	1
IL2RA	0	0	0	1	0	0	0	0
IL34	0	0	0	0	0	0	0	1
IL36G	0	0	0	0	0	1	0	0
IL4I1	0	0	0	0	1	0	0	0
IL6	1	1	0	0	0	1	0	0
IL7R	1	0	1	1	1	1	0	0
IMPDH1	0	1	1	0	0	1	0	0
INF2	0	0	0	0	1	1	0	0
INHBA	0	0	0	0	0	1	0	0
INMT	1	0	0	0	0	0	0	0
INO80B	0	0	0	0	0	0	1	0
INPP4A	1	1	1	1	1	0	1	1
INPP5J	0	0	1	0	1	0	0	0
INSYN1	1	1	1	0	1	0	1	1
INTS6-AS1	0	1	0	0	0	0	0	0
INTS8	1	1	1	0	1	1	1	0
INVS	0	1	1	0	0	1	0	0
IPCEF1	0	0	1	1	0	0	1	0
IPO5P1	1	1	1	1	1	0	1	1
IPO9	1	1	1	1	1	0	1	1
IQCC	0	0	0	0	0	0	1	0
IQCD	1	1	0	1	1	0	1	1
IQCG	0	1	0	0	0	0	0	0
IQCH	0	1	0	0	0	0	0	0
IQGAP3	1	1	1	0	1	0	0	1
IRAG2	1	1	1	1	1	0	0	1
IRAK1BP1	0	0	0	0	0	0	0	1
IRF1-AS1	0	0	0	1	0	0	0	0
IRF4	1	1	0	1	1	0	0	1
IRF7	0	0	0	1	0	0	0	0
IRF9	0	0	0	0	0	0	1	0
ISG15	0	0	0	0	0	1	0	0
ISG20	0	0	1	1	0	0	1	0
ISLR	1	0	0	0	0	0	0	0
ISM1	1	0	0	0	0	0	0	0
ISY1	0	1	1	0	0	0	0	0
ITGA1	0	1	0	1	1	1	0	0
ITGA11	1	1	1	1	1	0	0	1
ITGA2B	1	0	1	1	0	0	1	0
ITGA3	0	0	0	0	0	1	0	0
ITGA4	0	0	0	1	0	0	0	0
ITGA5	1	1	1	0	0	1	0	0
ITGA6	0	0	0	0	0	1	0	0
ITGA7	0	0	0	0	1	0	0	0
ITGA9	1	1	1	1	1	0	0	1
ITGA9-AS1	0	0	0	0	0	0	1	0
ITGAM	1	1	1	1	1	0	1	1
ITGAV	1	0	1	1	1	1	0	0
ITGAX	1	1	1	1	1	0	1	1
ITGB1BP2	0	1	0	1	1	0	1	0
ITGB3BP	0	0	0	0	0	0	1	0
ITGB6	0	0	0	0	0	1	0	0
ITIH5	1	0	0	0	0	0	0	0
ITM2A	0	0	0	1	0	0	0	0
ITPKA	0	0	0	0	0	0	1	0
ITPR1	1	0	0	1	0	0	0	0
ITPR2	0	1	1	0	0	0	0	0
ITPR3	0	1	0	0	0	0	0	0
IZUMO4	0	1	0	0	0	0	1	1
JADE1	1	1	1	1	1	0	1	0
JADE2	1	0	0	1	1	1	0	0
JAG1	1	1	1	0	1	1	0	0
JAG2	0	1	1	0	1	1	1	0
JAK3	0	0	0	1	0	0	0	0
JAM2	0	0	1	0	0	0	0	0
JARID2-DT	1	0	1	0	0	0	1	1
JCAD	0	0	1	0	1	0	0	1
JHY	0	0	0	0	0	1	0	0
JMJD7-PLA2G4B	0	0	1	0	0	0	0	0
JPH1	0	0	0	0	1	0	0	0
JPH2	0	0	0	0	1	0	0	0
KALRN	0	0	0	1	1	1	0	1
KANK3	1	0	0	0	0	0	0	0
KAT2A	0	0	1	0	0	0	0	1
KAT2B	0	1	1	1	1	1	0	1
KATNAL1	0	0	0	1	0	0	0	0
KAZN	0	0	0	0	0	0	0	1
KBTBD11	1	1	1	1	1	0	0	1
KBTBD3	0	0	0	0	0	0	1	0
KBTBD6	1	1	1	1	1	0	0	0
KCNAB1	1	0	0	0	0	0	0	0
KCNAB2	0	1	0	0	0	0	0	1
KCNAB3	1	1	1	1	1	0	1	1
KCNC3	0	0	0	0	0	0	1	0
KCND1	1	0	0	0	0	0	0	0
KCNE4	1	0	0	0	0	0	0	0
KCNH3	0	0	0	0	0	0	1	0
KCNIP2	1	1	1	1	1	0	1	1
KCNJ11	0	0	0	0	1	0	0	0
KCNJ8	1	1	1	1	1	0	0	1
KCNK13	0	0	1	1	0	0	0	1
KCNK5	0	0	0	1	0	0	0	0
KCNMB1	1	1	1	1	1	0	1	1
KCNMB3	1	0	1	1	1	0	0	0
KCNMB4	1	1	1	1	1	0	1	1
KCNQ1OT1	1	1	1	0	1	0	1	1
KCNQ4	0	0	0	0	1	0	0	0
KCP	0	0	0	0	0	0	1	0
KCTD17	1	0	0	0	0	0	0	0
KCTD21-AS1	1	0	0	0	0	0	0	0
KCTD6	0	0	0	0	0	0	0	1
KCTD7	0	0	0	1	1	0	0	1
KDELR3	0	1	0	0	1	0	0	0
KDM4A-AS1	0	0	0	0	0	0	1	0
KDSR-DT	1	1	1	1	1	0	1	1
KHDC1-AS1	0	0	0	0	0	1	0	0
KHDC4	0	1	0	0	1	0	0	1
KHDRBS3	1	1	1	0	1	0	1	1
KIAA0895	0	1	1	0	1	0	1	1
KIAA0895L	0	1	1	0	1	0	0	0
KIAA1549L	1	0	0	0	0	0	0	0
KIAA1614	0	1	1	1	1	0	1	0
KIF11	0	1	0	0	0	0	0	0
KIF13B	1	1	1	1	1	1	0	1
KIF14	0	0	0	0	1	1	0	1
KIF15	0	0	1	1	0	0	1	0
KIF17	0	0	1	0	0	0	0	0
KIF18A	0	1	0	0	0	0	0	0
KIF18B	1	1	1	1	1	0	1	1
KIF20A	0	1	0	0	0	0	0	0
KIF20B	0	0	1	0	0	0	0	0
KIF21B	0	0	0	1	0	0	0	0
KIF22	0	1	1	1	0	0	1	0
KIF23	0	1	0	0	0	0	0	0
KIF24	0	1	0	0	0	0	0	0
KIF26A	1	1	1	0	1	0	0	1
KIF26B	1	0	0	1	0	0	0	0
KIF2C	0	1	0	0	0	0	0	0
KIF3C	0	0	1	0	0	0	0	0
KIF4A	0	1	0	0	0	0	0	0
KIF7	1	0	0	0	0	0	0	0
KIF9	1	1	1	0	1	0	1	1
KIFC1	0	1	1	1	0	0	1	0
KIFC2	0	0	0	0	0	0	1	0
KIFC3	0	0	0	0	0	1	0	0
KIRREL1	0	0	0	0	0	1	0	0
KIT	0	1	0	0	1	0	0	0
KIZ	0	0	0	0	0	0	1	0
KLF12	1	1	0	0	0	0	1	1
KLF2	1	0	0	0	0	0	0	0
KLF3-AS1	0	0	0	0	0	0	1	0
KLF7	1	0	0	0	0	0	0	0
KLF8	0	0	0	0	0	0	0	1
KLHDC7B	0	1	1	1	1	0	0	0
KLHDC7B-DT	0	0	0	0	0	0	1	0
KLHL13	1	0	1	0	0	0	1	0
KLHL17	0	1	1	0	1	0	1	0
KLHL35	0	0	0	0	0	0	1	0
KLHL42	1	1	0	0	0	0	1	1
KLHL5	0	1	1	0	1	1	0	0
KLHL6	0	0	0	1	0	0	0	0
KLRB1	1	0	0	1	0	0	1	1
KMO	0	0	0	1	0	0	0	0
KMT5C	0	0	0	0	0	0	1	0
KNL1	1	1	0	1	0	0	0	1
KNSTRN	0	1	0	0	0	0	0	0
KNTC1	0	1	0	0	0	0	0	0
KPNA2	0	1	1	0	1	1	1	0
KRBA1	1	0	0	0	1	1	1	0
KREMEN2	0	0	0	0	0	0	1	0
KRT13	0	0	1	1	0	0	0	1
KRT16P6	0	0	1	0	1	0	0	0
KRT17	0	0	0	0	1	1	0	0
KRT23	0	0	0	0	0	0	0	1
KRT7	0	1	0	0	0	0	1	0
KRT78	0	0	0	0	0	0	0	1
KRT8P12	0	1	0	0	0	0	0	0
KTN1-AS1	0	0	0	0	1	1	0	0
KYAT1	0	0	0	0	0	0	1	0
KYNU	0	0	0	0	0	1	0	0
L1CAM	0	1	1	0	1	1	0	0
L3HYPDH	0	0	0	0	0	0	1	0
LAG3	0	0	0	1	0	0	0	0
LAIR1	0	1	0	0	0	0	0	0
LAMA1	1	1	1	0	1	1	0	0
LAMA3	0	0	0	0	0	1	0	0
LAMA4	1	0	0	0	0	0	0	0
LAMB1	0	1	0	1	1	0	0	0
LAMB3	0	1	1	0	1	1	0	0
LAMC1	1	1	0	1	0	1	0	0
LAMC2	0	0	0	0	0	1	0	0
LAMP3	0	0	0	1	0	0	0	0
LAMP5	0	0	0	1	0	0	0	0
LANCL3	0	0	0	0	0	0	0	1
LARGE2	0	0	1	0	0	1	0	0
LARP6	1	0	0	0	0	0	0	0
LAT2	1	1	1	1	1	0	1	0
LAX1	0	0	0	1	0	0	0	0
LAYN	0	0	0	0	1	0	0	0
LBH	0	0	0	1	0	0	0	0
LBHD1	0	0	0	0	0	0	1	0
LBX2-AS1	0	0	0	1	1	0	0	0
LCAT	0	1	0	1	0	0	1	0
LCK	0	1	0	1	1	0	1	1
LCLAT1	0	1	0	0	0	0	0	1
LCN2	0	0	0	0	1	1	0	0
LCP2	0	0	1	0	0	1	0	1
LDB3	0	0	0	0	1	0	0	0
LDHD	0	0	1	0	1	0	1	1
LDOC1	0	0	0	0	0	0	0	1
LEF1	1	0	0	0	0	0	0	0
LEMD1	0	1	0	0	0	0	0	0
LENG8-AS1	0	0	0	0	0	0	1	0
LEPR	1	0	0	0	0	0	0	0
LETM2	0	0	0	0	0	1	0	0
LFNG	1	0	0	0	0	0	0	0
LGALS1	1	0	0	1	0	1	0	0
LHFPL2	1	1	1	1	1	1	0	0
LIF	1	0	0	0	0	0	0	0
LIFR	1	0	1	0	1	0	1	1
LIG1	0	1	1	0	0	0	1	0
LILRA5	1	1	1	1	1	1	0	0
LILRA6	0	0	0	1	0	0	0	0
LILRB1	1	1	1	0	0	0	0	0
LILRB2	1	1	1	1	1	1	0	0
LILRB3	0	0	0	1	0	0	0	0
LILRB4	0	1	0	1	0	0	0	0
LIMCH1	0	0	1	0	0	0	0	0
LIMD2	0	0	1	1	1	0	1	1
LIME1	1	1	1	1	1	0	1	0
LIMK1	1	0	0	0	0	0	0	0
LIN37	0	0	1	0	0	0	0	0
LIN52	1	1	1	1	0	0	1	1
LIN9	0	1	0	0	0	0	0	0
LINC00174	0	0	0	0	0	0	1	0
LINC00205	1	1	0	1	1	0	0	1
LINC00242	0	0	0	0	1	0	0	0
LINC00294	0	1	1	0	0	1	1	0
LINC00511	0	0	0	0	0	0	1	0
LINC00623	0	0	0	0	0	0	1	0
LINC00630	1	0	1	0	0	0	0	1
LINC00638	1	0	1	1	0	0	0	1
LINC00665	0	1	1	0	1	0	1	1
LINC00680	0	0	0	0	0	0	1	0
LINC00839	0	0	0	0	1	0	0	1
LINC00869	0	0	0	0	0	0	1	0
LINC00899	1	0	1	0	1	0	1	1
LINC00926	0	0	0	0	0	0	1	0
LINC00957	0	1	0	0	0	0	0	0
LINC00997	0	0	0	0	0	0	1	0
LINC01006	0	0	1	1	0	0	0	0
LINC01089	0	0	0	0	0	0	1	0
LINC01094	0	0	1	0	1	0	0	0
LINC01116	0	0	0	0	0	1	0	0
LINC01138	1	1	1	1	1	0	1	1
LINC01145	0	1	0	1	1	0	0	0
LINC01176	0	0	1	0	1	1	0	0
LINC01232	0	1	0	1	1	1	1	0
LINC01270	0	0	0	0	0	1	0	0
LINC01355	0	0	0	0	0	0	1	0
LINC01376	1	0	1	1	0	0	1	0
LINC01410	1	1	0	0	1	0	0	0
LINC01503	0	0	0	0	0	0	1	0
LINC01521	1	0	1	0	0	0	1	1
LINC01605	0	0	1	0	1	1	0	0
LINC01679	1	1	1	1	1	1	0	0
LINC01772	1	1	1	1	1	0	1	1
LINC02298	0	0	0	0	0	0	1	0
LINC02361	1	1	0	0	0	0	1	1
LINC02542	1	0	1	0	0	1	0	1
LINC02560	0	0	1	0	1	1	1	1
LINC02604	1	0	1	1	1	0	1	1
LINC02609	0	0	0	0	0	0	1	0
LINC02614	0	0	0	0	0	0	1	0
LINC02693	1	1	1	0	1	0	0	0
LINC02762	0	0	0	0	0	1	0	0
LINC02878	0	0	1	0	0	0	0	0
LINC02901	0	0	0	0	0	0	1	0
LINGO1	1	1	1	0	0	0	0	0
LIPE	1	1	1	1	1	0	1	1
LIPG	0	1	0	0	0	1	0	0
LIPH	0	0	0	0	0	0	0	1
LMCD1	1	0	0	0	0	0	0	0
LMLN	0	1	0	0	0	0	0	0
LMNB2	0	1	0	0	0	0	0	0
LMNTD2	0	0	0	0	0	0	1	0
LMO2	0	1	1	1	0	0	0	0
LMO7	0	0	0	0	0	1	0	0
LMOD1	1	0	0	0	0	0	0	0
LNCOC1	0	1	0	0	0	0	0	0
LNP1	1	1	1	0	0	0	0	0
LNX1	0	1	1	1	1	0	1	1
LONRF1	0	0	0	0	0	0	0	1
LOX	1	0	1	1	1	1	0	0
LOXL1	1	0	0	0	1	0	1	1
LOXL1-AS1	1	1	1	0	1	0	0	1
LOXL2	0	0	0	0	0	1	0	0
LOXL3	1	1	1	1	1	0	1	1
LPAR2	0	0	0	0	0	0	1	0
LPAR3	0	1	1	0	1	1	0	0
LPCAT1	0	0	0	0	1	0	0	0
LPCAT2	0	0	0	0	0	1	0	0
LPIN1	0	0	0	1	1	0	0	0
LPL	1	0	0	0	0	0	0	0
LPXN	0	0	0	1	0	0	0	0
LRCH3	0	1	0	0	0	0	0	0
LRFN4	0	0	0	0	0	0	1	0
LRG1	0	0	0	0	0	0	0	1
LRIF1	0	1	0	0	0	0	0	0
LRIG2	1	1	0	1	1	1	1	1
LRP12	1	0	1	0	1	1	0	1
LRP8	0	1	1	0	1	0	1	0
LRR1	0	1	0	0	0	0	0	0
LRRC15	1	0	0	0	0	0	0	0
LRRC17	1	0	1	1	1	0	0	0
LRRC20	0	0	0	0	1	0	0	0
LRRC3	0	0	0	0	0	1	0	0
LRRC4B	1	0	0	0	0	0	0	0
LRRC69	0	1	1	0	1	0	0	1
LRRC75A	1	1	1	1	1	0	0	1
LRRC75B	0	1	1	1	1	1	1	0
LRRC8C	0	0	0	0	0	1	0	0
LRRC8D	1	1	1	0	1	1	0	1
LRRCC1	0	1	1	0	0	0	0	0
LRRN3	0	0	0	1	0	0	0	0
LRRN4CL	1	0	0	0	0	0	0	0
LRWD1	0	0	0	0	0	0	0	1
LSAMP	1	0	0	0	0	0	0	0
LSM11	0	0	0	0	0	0	1	0
LSMEM1	0	0	0	0	0	0	1	0
LSP1P4	1	0	1	0	1	1	1	0
LTB	0	0	0	1	0	0	0	0
LTBP1	0	0	0	0	0	1	0	0
LTBP2	1	1	1	1	1	1	0	0
LTO1	0	0	0	0	0	0	1	0
LUM	1	0	0	0	0	0	0	0
LURAP1L	1	1	0	1	0	0	0	0
LY6E-DT	1	0	1	0	0	0	0	0
LY6K	0	0	1	0	1	0	0	0
LYL1	0	1	1	0	1	0	1	1
LYNX1	0	0	0	0	1	0	0	1
LYPD1	0	0	0	0	0	1	0	0
LYRM4	0	1	0	0	0	0	0	0
LYRM9	0	0	0	0	0	0	1	0
LYZ	1	0	1	1	0	0	0	0
LZTR1	0	0	0	0	0	0	1	0
MACC1	0	0	0	0	0	0	0	1
MAD1L1	0	1	1	0	0	1	1	0
MAD2L1	0	1	1	1	0	0	1	0
MAD2L2	1	1	1	0	1	0	1	0
MAGI1	0	1	1	1	1	0	0	1
MAGI2-AS3	1	1	1	0	0	0	0	1
MAGI3	1	1	1	1	1	0	0	0
MAGIX	0	0	0	0	0	0	1	0
MAGOHB	0	0	0	0	0	0	1	0
MAL	1	1	1	1	0	0	0	1
MAMDC4	1	0	1	0	0	0	0	1
MAML3	0	1	0	1	0	0	0	1
MAMLD1	0	0	0	0	1	0	0	0
MAN1C1	0	0	0	1	0	0	0	0
MANBA	0	0	1	0	0	0	0	0
MANEAL	0	1	0	0	0	0	0	0
MANSC1	0	1	0	0	0	0	0	0
MAP3K10	0	0	0	0	0	0	1	0
MAP3K12	1	0	0	0	0	0	0	0
MAP3K14-AS1	1	1	1	1	1	0	1	1
MAP3K21	1	1	0	0	1	0	1	1
MAP3K4-AS1	0	0	1	1	1	1	0	0
MAP3K8	1	1	1	1	1	0	1	1
MAP4K2	0	0	0	0	0	0	1	0
MAP7D3	0	0	0	0	1	0	0	0
MAPK11	0	0	0	0	0	0	1	0
MAPK15	0	1	0	0	1	0	0	0
MAPK8IP2	0	0	0	0	0	0	1	0
MAPK8IP3	0	1	1	0	0	0	1	0
MAPT	0	0	0	1	1	0	0	0
MARCHF1	0	0	0	1	0	0	0	0
MARCHF3	0	0	1	0	1	0	1	1
MARCKSL1	1	1	0	1	1	0	1	1
MARK1	0	0	0	0	1	0	0	0
MARVELD1	1	0	0	0	0	0	0	0
MARVELD3	0	0	0	0	0	0	1	0
MAST1	0	0	1	0	0	0	1	0
MASTL	0	1	0	0	1	0	0	1
MATN3	1	1	1	0	1	1	0	0
MB21D2	1	0	1	1	1	0	0	0
MBNL1-AS1	1	0	0	0	0	0	0	0
MC1R	0	0	0	0	0	0	1	0
MCAM	1	0	0	0	0	1	0	0
MCF2L	0	0	0	0	0	0	0	1
MCF2L2	0	0	0	0	0	1	0	0
MCM10	0	1	1	1	1	0	1	1
MCM2	0	0	1	1	0	0	0	1
MCM3AP-AS1	0	0	1	1	0	0	1	0
MCM4	0	1	0	0	0	0	0	0
MCM5	0	1	0	0	0	0	0	1
MCM6	1	0	1	0	1	0	0	1
MCM7	1	1	1	0	1	0	1	0
MCM8	1	0	1	0	0	0	0	0
MCOLN2	0	0	0	1	0	0	0	0
MCPH1-DT	0	0	0	0	0	0	1	0
MCTP1	0	0	0	0	0	1	0	0
MCUB	0	1	0	1	1	1	0	0
MDC1	0	0	0	0	0	0	1	0
MDGA1	1	0	0	0	0	0	0	0
ME3	0	0	1	1	1	0	0	1
MEAK7	0	0	1	0	0	1	0	0
MECOM	0	0	0	0	0	0	0	1
MED30	0	0	0	0	1	0	0	0
MEF2C	0	0	0	0	1	0	0	0
MEFV	1	1	1	1	1	1	0	0
MEI1	0	0	0	1	0	0	0	0
MEIS1	1	1	0	1	0	0	0	0
MEIS2	0	0	0	0	0	0	0	1
MEIS3	1	0	0	0	0	0	0	0
MELK	0	1	1	1	1	1	0	0
MELTF	0	0	0	0	0	0	1	0
MELTF-AS1	0	0	0	0	0	0	1	0
MEST	1	1	1	0	0	0	1	1
MET	1	1	1	0	1	1	0	0
METRN	0	0	0	0	0	0	1	0
METTL4	0	1	0	0	0	0	0	0
METTL7A	0	0	0	0	0	0	0	1
MEX3A	1	0	0	0	0	0	0	0
MEX3B	1	0	0	0	0	0	1	1
MEX3D	1	1	1	0	0	1	1	1
MFAP2	0	0	1	0	0	0	0	0
MFAP4	1	0	0	0	0	0	0	1
MFHAS1	0	1	1	1	1	0	1	1
MFSD12	1	1	1	1	1	1	1	0
MFSD13A	1	0	1	1	0	0	1	1
MFSD2B	0	0	0	0	0	0	1	0
MFSD4A	1	1	1	1	1	0	1	0
MFSD4B	0	0	0	0	1	0	0	0
MGAT2	1	0	1	1	0	1	0	1
MGAT4A	0	0	0	1	0	0	0	0
MGAT5B	1	0	0	0	0	0	0	0
MGLL	0	0	0	0	1	0	0	0
MGME1	0	1	0	0	0	0	0	0
MGP	1	0	0	0	0	0	0	0
MGST1	0	0	0	0	0	0	0	1
MIAT	1	1	1	1	1	0	1	1
MICA	0	0	0	1	1	0	0	0
MICAL1	1	0	1	1	1	1	1	0
MICAL2	1	1	1	1	1	0	0	0
MICAL3	0	1	0	0	0	0	0	0
MICALL2	1	0	1	1	1	0	1	0
MICB	0	1	1	0	1	1	0	0
MIF4GD-DT	0	1	0	0	0	0	0	0
MIIP	0	0	0	1	0	0	0	0
MINDY1	0	0	0	1	0	0	0	0
MINDY4	1	1	0	0	1	0	1	0
MINPP1	0	1	0	0	0	0	0	0
MIR100HG	1	1	1	1	1	0	0	1
MIR1915HG	1	0	0	0	0	0	0	0
MIR193BHG	0	0	1	0	0	0	0	0
MIR222HG	0	0	0	1	0	0	1	0
MIR23AHG	0	1	1	0	1	0	1	0
MIR29B2CHG	0	0	0	0	0	0	1	0
MIR3667HG	1	0	0	0	0	0	0	0
MIR4435-2HG	1	0	0	0	0	0	0	0
MIR762HG	1	0	1	1	0	0	1	0
MIR9-3HG	0	0	0	1	0	0	0	0
MIRLET7IHG	0	0	0	0	0	0	1	0
MIS18A	0	1	0	0	0	0	0	0
MISP	0	0	0	0	0	1	0	0
MISP3	0	0	0	0	0	0	1	0
MITD1	0	0	0	0	0	0	1	0
MITF	0	0	0	0	1	0	0	0
MKI67	0	0	0	0	0	1	0	0
MKRN2OS	0	0	0	0	0	0	0	1
MLF1	0	0	0	0	0	0	1	0
MLIP	0	0	0	0	1	0	0	0
MLLT11	0	1	1	0	1	0	1	1
MLPH	1	0	0	0	0	0	0	0
MLYCD	0	0	0	0	0	0	1	0
MMD	1	0	0	0	0	0	0	0
MME	1	0	0	0	0	0	0	0
MMP1	0	0	0	0	1	0	0	0
MMP10	0	0	1	0	0	0	0	0
MMP11	1	0	0	0	1	0	0	0
MMP12	0	0	0	1	0	0	0	0
MMP14	1	1	0	1	0	1	0	0
MMP16	0	0	1	1	1	0	0	0
MMP17	1	0	1	0	1	1	0	0
MMP19	1	0	0	0	0	0	0	0
MMP2	1	0	0	0	0	1	0	0
MMP25	0	0	0	1	0	0	0	0
MMP25-AS1	1	0	0	0	0	0	0	1
MMP28	0	0	0	0	0	1	0	0
MMP3	0	0	0	0	0	1	0	0
MMP9	1	0	0	0	0	0	0	0
MMS22L	0	1	0	0	0	0	0	0
MN1	0	0	1	0	0	1	0	0
MND1	0	0	1	1	0	0	0	0
MOB3B	0	1	0	1	1	0	0	0
MOK	1	1	1	0	1	0	1	1
MORC2	1	1	1	0	1	0	1	0
MOXD1	0	0	0	0	0	0	0	1
MPC1	1	1	1	1	1	0	1	1
MPHOSPH9	1	1	1	1	1	0	0	1
MPLKIP	0	0	0	0	0	0	1	0
MPP3	1	1	1	0	1	0	1	1
MPP7	1	1	1	0	1	1	0	1
MRC1	0	1	1	0	0	0	0	0
MRGBP	0	0	1	0	1	1	1	0
MROH8	0	1	1	1	0	0	1	0
MRPL20-DT	0	1	1	1	1	0	0	0
MRPL53	0	0	0	0	1	0	1	0
MS4A14	0	0	1	0	0	0	0	0
MS4A4A	0	0	0	0	1	0	0	0
MS4A7	1	0	0	1	1	1	0	0
MSANTD3	0	0	1	0	0	0	0	0
MSC	1	0	0	0	0	0	0	0
MSC-AS1	1	0	0	0	0	1	0	0
MSH6	0	1	0	0	0	0	0	0
MSR1	0	0	1	1	1	0	0	0
MSRA	1	1	0	1	0	0	0	1
MST1R	0	0	0	1	0	0	0	0
MSTO1	1	1	0	0	0	0	0	0
MSTO2P	0	0	0	0	0	0	1	0
MSX1	0	0	0	0	0	0	1	0
MSX2	1	0	1	0	1	0	0	0
MT1F	0	0	0	0	0	0	1	0
[truncated: 1,618 more rows]

## Sheet: COVID-19
id	m0	m1	m2	m3	m4	m5	m6	m7	m8
ABCA13	0	0	1	0	0	0	0	0	0
ABCB9	0	0	0	0	0	1	0	0	0
AC002456.2	0	1	0	0	0	0	0	0	0
AC005154.8	0	0	1	0	0	0	0	0	0
AC007386.4	1	1	1	0	0	1	0	0	0
AC007556.3	0	1	0	0	0	0	0	0	0
AC007773.2	1	0	0	0	0	0	0	0	0
AC007879.5	0	1	0	0	0	0	0	0	0
AC007950.1	0	0	1	0	0	0	0	0	0
AC008984.7	0	0	1	0	0	0	0	0	0
AC010746.3	0	1	0	0	0	0	0	0	0
AC010878.3	0	0	0	0	0	0	1	0	0
AC011380.8	0	1	0	0	0	0	0	0	0
AC018755.16	0	0	0	0	0	0	1	0	0
AC091132.1	1	1	1	0	0	0	0	0	0
AC093159.1	0	0	0	0	0	0	1	0	0
AC093642.3	0	0	0	0	0	0	0	0	1
AC093642.4	0	0	1	0	1	0	0	0	0
AC098820.3	0	0	0	0	0	1	0	0	0
AC104809.4	0	0	0	1	1	0	0	0	0
AC108463.2	0	1	0	0	0	1	0	0	0
ACOT7	0	0	0	0	1	0	0	0	0
ACOX2	0	0	0	0	0	1	0	0	0
ACSL1	0	0	0	0	0	1	0	0	0
ACSM1	1	0	0	0	0	0	0	1	0
ACTBP8	0	0	1	0	0	1	1	0	0
AD000684.2	0	0	0	0	0	1	0	0	0
ADAM1B	0	0	0	1	0	0	0	0	0
ADAM9	0	0	0	0	0	1	0	0	0
ADAMTS14	0	0	1	0	0	0	0	0	0
ADAMTS4	0	0	1	0	0	0	0	0	0
ADGRB2	1	0	0	0	0	0	0	0	0
ADM	0	1	0	0	0	0	0	0	0
AHNAK2	1	0	0	0	0	0	0	0	0
AK4	1	1	0	0	1	1	0	0	0
AK5	1	0	0	1	0	0	0	0	0
AK8	0	0	0	0	1	1	0	1	0
ALDH1A1	0	1	0	0	0	0	0	0	0
ALDH1A2	1	1	1	0	0	0	1	1	0
ALS2CL	0	0	0	0	1	0	0	0	0
ANLN	0	1	0	0	0	0	0	0	0
ANO5	0	1	0	0	0	0	0	1	0
ANOS1	0	0	0	0	0	1	0	0	0
APBA1	0	0	0	1	0	0	0	0	0
APOBEC3B	1	0	1	0	0	0	1	0	0
AR	0	0	0	0	0	0	1	0	0
ARHGAP23	1	0	1	0	1	1	1	1	0
ARHGAP42	0	0	0	0	1	0	0	0	0
ARPIN	0	0	0	0	0	1	0	0	0
ASGR2	1	0	1	0	0	1	1	1	1
ASPH	0	0	0	0	0	0	1	0	0
ASPM	0	0	0	0	0	0	1	0	0
ATP2A1-AS1	0	0	0	0	0	0	0	1	0
AUNIP	0	0	0	0	1	0	0	0	0
AURKA	0	0	0	0	0	0	0	0	1
AURKB	0	0	1	0	1	1	0	1	1
B4GALT2	1	0	1	0	1	1	1	1	1
B4GALT5	1	0	0	0	0	0	0	0	0
B9D1	0	0	0	0	1	0	0	0	0
BAALC	1	0	0	0	0	0	0	1	0
BAG1	0	0	0	1	0	0	0	0	0
BCAT1	0	0	0	0	0	0	0	1	0
BEND7	0	1	0	0	0	0	0	0	0
BHLHE41	0	1	0	0	0	0	0	0	0
BIRC5	1	0	1	0	1	0	0	1	1
BMX	0	0	0	0	0	0	0	0	1
BRIP1	0	0	0	0	1	0	0	0	0
BUB1	1	0	1	0	1	1	1	0	1
C17orf96	1	0	0	1	1	0	1	1	1
C1orf145	0	0	0	0	0	0	0	1	0
C1QB	1	0	0	1	0	0	1	0	1
C20orf144	0	0	0	0	0	0	1	0	0
C3AR1	1	0	0	0	0	1	1	0	1
C6orf222	0	0	1	0	0	0	0	0	0
CA4	1	0	0	0	0	0	0	0	0
CABLES1	0	0	0	0	1	0	0	0	0
CABP4	1	0	0	0	0	0	0	0	0
CACNA1E	0	1	0	0	0	0	0	0	0
CACNA2D3	0	1	0	0	0	0	0	0	0
CADM1	0	0	0	0	1	0	0	0	0
CATSPERB	0	0	0	0	1	0	0	0	0
CAV2	1	0	0	0	0	0	0	0	0
CBX2	0	0	0	1	0	0	0	1	0
CCDC71L	0	0	0	0	0	0	1	0	0
CCNA2	0	0	0	0	0	0	1	0	0
CCNB1	0	0	0	0	0	0	0	1	0
CCNE1	0	0	0	0	1	0	0	0	0
CCNF	0	0	0	0	0	0	0	1	0
CD38	0	0	0	0	0	1	0	0	0
CDC42BPA	0	0	0	0	0	0	1	0	0
CDC42EP3	1	1	1	0	0	0	0	0	0
CDC45	1	0	0	0	0	0	0	0	0
CDC6	0	0	0	0	1	0	0	0	0
CDCA7	1	0	0	0	0	0	0	0	0
CDCA8	1	0	0	0	0	0	0	0	0
CDHR1	1	0	0	0	0	0	0	0	0
CDK14	0	0	1	0	0	0	0	0	0
CDKN3	1	0	0	0	0	0	0	0	0
CEACAM8	0	0	0	0	0	1	0	0	0
CENPA	0	0	0	0	0	0	1	0	0
CENPE	0	0	1	0	0	0	0	0	0
CENPF	0	0	1	0	0	0	0	0	0
CENPI	1	0	1	0	1	1	1	0	1
CENPN	0	0	0	0	0	1	0	0	0
CENPW	1	0	0	0	0	0	0	0	0
CEP55	0	0	1	0	0	0	0	0	0
CES1	1	0	0	0	0	0	0	0	0
CFAP46	0	0	0	0	0	0	0	0	1
CFAP54	1	1	1	0	0	0	0	0	0
CH17-212P11.4	0	0	0	0	0	0	0	1	0
CH17-373J23.1	0	0	0	0	1	0	0	0	0
CHAF1B	1	0	1	0	1	0	1	1	1
CHEK1	1	0	1	0	1	0	1	1	1
CHGA	0	0	0	0	0	0	0	1	0
CHI3L1	0	0	0	0	0	0	0	0	1
CHIT1	0	0	1	0	0	0	0	0	0
CIART	0	0	0	0	0	0	1	0	0
CILP2	1	1	1	0	0	0	1	0	0
CITF22-49E9.3	0	0	0	0	0	0	1	0	0
CKAP2L	1	0	0	0	0	0	0	0	0
CKAP4	1	0	1	0	0	1	1	1	0
CLDN11	0	0	0	0	0	0	1	0	0
CLDN23	0	0	0	0	0	1	0	0	0
CLEC4D	0	0	1	0	0	1	0	0	0
CLIC4	1	0	1	0	1	1	1	1	0
CLSPN	0	0	0	0	0	0	1	0	0
CLU	1	0	0	0	0	0	1	0	0
COL17A1	1	0	1	0	0	0	0	0	0
COL4A1	0	0	0	0	0	0	1	0	0
COL5A1	1	1	1	0	0	0	0	0	0
CPLX2	1	0	0	0	0	0	0	0	0
CR1	0	0	0	0	0	0	1	0	0
CRIP2	0	0	1	0	0	0	0	0	0
CRISP2	1	0	1	0	1	0	0	0	0
CRISP3	1	0	1	1	1	1	0	0	0
CROCC2	0	0	0	1	1	0	0	0	1
CRYM	1	0	0	0	0	1	0	1	0
CST7	1	0	0	0	0	0	0	0	0
CTB-133G6.2	0	0	0	0	0	1	1	0	0
CTB-176F20.3	0	0	1	0	0	0	0	0	0
CTB-61M7.2	1	0	0	0	0	0	0	0	0
CTB-83J4.1	0	0	0	0	0	1	0	0	0
CTC-308K20.1	1	1	0	0	0	0	0	0	1
CTC-425O23.5	0	0	0	0	0	1	0	0	0
CTC-510F12.2	0	0	0	0	1	0	0	0	0
CTC-756D1.1	1	0	0	0	0	0	0	0	0
CTD-2017F17.2	0	1	0	0	0	0	0	0	0
CTD-2047H16.3	0	0	0	1	0	0	0	0	0
CTD-2083E4.4	1	0	1	0	0	0	0	0	1
CTD-2095E4.4	0	0	0	0	0	0	0	1	0
CTD-2227E11.1	0	0	1	0	1	0	0	0	0
CTD-2308N23.2	1	1	1	0	0	1	0	0	0
CTD-2555O16.2	1	1	0	1	1	0	0	0	0
CTD-3064M3.3	0	0	0	0	1	0	0	0	0
CTD-3137H5.1	0	0	0	0	0	0	1	0	0
CTF1	0	0	0	0	1	0	0	0	0
CTNNAL1	1	0	1	1	1	0	0	0	0
CTSD	0	0	0	0	0	0	0	0	1
CUX2	0	0	0	0	0	0	0	1	0
CYB5R2	0	0	0	0	0	1	0	0	0
CYP4F35P	0	0	0	1	0	0	0	0	0
DACH1	0	0	1	0	0	0	0	0	0
DBH	0	0	0	0	0	0	0	0	1
DBNDD1	0	0	0	0	1	0	0	0	0
DDAH2	0	0	0	0	0	0	0	0	1
DDIAS	1	0	0	0	0	0	1	1	0
DERL3	0	0	0	0	1	0	0	0	0
DGCR9	0	0	0	0	0	0	0	0	1
DHCR24	0	0	1	0	1	1	0	0	1
DHFR	0	0	0	0	0	0	0	0	1
DHRS9	1	0	1	0	0	0	1	1	0
DMRTC2	1	1	0	0	0	0	0	0	0
DNASE1L3	1	0	0	0	0	0	0	0	0
DOC2B	1	0	1	0	0	1	1	1	0
DOCK1	0	0	0	0	0	0	0	1	0
DTL	0	0	0	0	0	0	0	1	0
DUSP13	0	1	0	0	0	0	0	0	0
E2F8	1	0	0	0	0	0	0	0	0
EBF4	1	0	0	0	1	0	0	0	1
EBLN2	1	1	0	0	0	0	0	0	0
EEF1A1P30	0	0	0	0	1	0	0	0	0
EGF	0	0	0	0	0	1	0	0	0
ELFN1-AS1	0	0	0	0	0	0	1	0	0
ELL2	0	0	1	0	0	0	0	0	0
EME1	1	0	0	0	0	0	0	0	0
EMID1	0	0	0	1	0	0	0	0	0
ENAM	1	1	1	0	1	1	0	0	0
ENHO	0	0	0	0	0	0	0	0	1
ENPP3	1	0	0	0	0	0	0	0	0
EPHB2	1	0	0	0	0	0	0	0	0
EPHX2	1	0	0	0	0	0	0	0	0
ERCC6L	0	0	0	0	1	0	0	0	0
ERICH3	0	0	0	0	1	0	0	0	0
ESCO2	1	1	1	0	1	0	1	0	0
EXO1	1	0	1	0	1	0	1	1	0
EXOSC4	0	0	0	0	0	0	0	0	1
EZH2	0	0	0	0	0	0	1	0	0
F5	1	1	0	0	0	0	0	1	0
FA2H	1	0	0	0	0	0	0	0	0
FABP5	0	0	1	0	0	0	0	0	0
FAM111B	0	0	0	0	0	0	0	1	0
FAM171B	1	0	1	0	0	0	0	0	0
FAM20A	0	0	0	0	0	0	1	0	0
FAM20C	0	0	0	0	0	0	1	0	0
FAM72B	0	0	1	0	0	0	0	0	0
FAM83D	0	0	1	0	0	0	0	0	0
FANCI	1	0	0	0	0	0	0	0	0
FBLN5	1	1	1	0	1	0	0	0	1
FEN1	0	0	0	0	0	0	0	0	1
FER1L4	0	0	0	0	1	1	0	0	0
FGF13	0	0	0	0	0	0	0	1	0
FHIT	1	0	0	1	0	0	0	0	1
FLT1P1	0	1	0	0	0	0	0	0	0
FOSL1	1	0	0	0	0	0	0	0	0
FOXC1	0	1	0	0	0	0	0	0	0
FOXM1	0	0	1	0	1	1	1	1	0
FRMD3	1	0	0	0	0	1	1	1	0
FZD5	1	0	0	0	0	0	0	0	0
GADD45A	0	0	0	0	0	0	0	1	0
GALNT14	0	0	0	0	0	1	0	0	0
GALNT9	1	0	0	0	0	0	0	0	0
GAPDHP1	0	0	0	0	0	1	0	0	0
GAS6	0	0	0	0	1	0	0	0	0
GINS1	0	0	0	0	0	0	1	0	0
GINS4	1	0	0	0	0	0	0	0	1
GLDC	0	0	0	0	1	0	0	0	0
GMNN	0	0	0	0	1	0	0	0	0
GPR160	1	0	0	0	0	0	0	0	0
GPR27	0	0	1	0	0	0	0	0	0
GPRC5D	0	0	0	0	1	0	0	0	0
GPRIN1	0	0	0	0	0	0	0	1	0
GPT2	1	0	0	0	0	0	0	0	0
GRN	0	0	0	0	0	0	1	0	0
GS1-279B7.2	0	0	0	0	0	0	0	0	1
GS1-393G12.13	0	0	0	0	0	0	1	0	0
GYG1	0	0	0	0	0	0	1	0	0
H19	0	0	0	0	0	0	1	0	0
HBA1	0	0	0	1	0	0	0	0	0
HBA2	0	0	0	0	1	0	0	0	0
HBB	0	0	0	1	1	0	0	0	0
HELLS	0	0	1	0	0	0	1	0	1
HIST1H2AE	1	0	1	0	0	1	1	0	0
HIST1H2AI	1	0	0	0	0	0	0	0	0
HIST1H2BG	0	0	0	0	0	1	0	0	0
HIST1H2BK	0	0	0	0	0	0	0	1	0
HIST1H3G	0	1	0	0	0	0	0	0	0
HIST1H3H	1	0	0	0	0	0	0	0	0
HIST1H4D	0	0	0	0	0	0	1	0	0
HIST1H4J	1	0	1	0	0	0	1	0	1
HK3	0	0	0	0	0	0	0	1	0
HLA-DPB2	0	0	0	0	1	0	0	0	0
HLA-DQA1	0	0	0	0	0	0	1	0	0
HLA-DRB5	0	0	0	0	0	0	1	0	0
HLA-U	0	0	0	0	0	0	1	0	0
HMMR	1	0	0	0	0	0	0	0	0
HOXB-AS1	0	0	1	0	0	0	0	0	0
HPDL	1	0	0	0	0	0	1	0	1
HPGD	1	0	1	0	0	1	0	1	0
HSD3B7	0	0	1	0	0	0	0	0	0
HSP90B1	1	0	1	0	0	1	0	0	0
ICAM5	1	1	1	0	0	0	0	1	0
IFNL1	0	0	0	0	0	0	1	0	0
IGFBP2	1	0	0	0	0	0	0	0	0
IGHG4	0	0	0	0	0	1	0	0	0
IGHJ3P	0	0	0	0	0	1	0	0	0
IGHJ5	1	0	1	0	1	1	0	0	0
IGHV1-69-2	0	0	1	0	0	0	0	0	0
IGHV3-15	0	0	0	1	1	1	1	0	0
IGHV3-21	1	0	1	0	1	1	1	1	0
IGHV3-49	0	0	0	0	0	0	1	0	0
IGHV3-66	1	0	0	0	0	1	0	1	0
IGHV3-7	0	0	0	0	0	0	0	1	0
IGHV4-28	0	0	0	0	0	0	0	1	0
IGHV4-34	1	0	0	0	0	0	0	0	0
IGHV4-39	1	0	1	0	1	0	1	1	1
IGHV4-55	0	0	0	0	0	0	1	0	0
IGKC	0	0	0	0	0	1	0	0	0
IGKJ1	0	0	0	0	1	0	0	0	0
IGKV1-12	1	0	0	0	1	0	0	1	0
IGKV1-17	0	0	1	0	0	0	0	0	0
IGKV1-33	0	0	0	0	0	0	1	0	0
IGKV1-9	0	0	0	0	0	1	0	0	0
IGKV2-30	0	0	0	0	0	0	1	0	0
IGKV3-11	0	0	0	0	0	0	0	1	0
IGKV3-15	0	1	1	0	1	1	1	1	0
IGKV3D-11	0	0	1	0	0	0	0	0	0
IGKV3D-20	0	0	0	0	0	1	0	0	0
IGKV4-1	0	0	0	0	0	0	1	0	0
IGLC3	0	0	0	0	0	1	0	0	0
IGLJ2	0	0	1	0	0	0	0	0	0
IGLV1-41	0	0	0	0	0	0	0	1	0
IGLV1-44	1	0	0	0	0	0	0	0	0
IGLV1-47	0	0	0	0	0	0	0	1	0
IGLV2-14	0	0	1	0	1	1	0	0	0
IGLV2-18	1	0	0	1	0	0	0	0	0
IGLV2-23	0	0	0	1	0	0	0	0	0
IGLV3-1	1	0	0	1	1	1	0	1	0
IGLV3-16	0	1	1	0	0	1	1	0	0
IGLV3-19	0	0	0	0	1	0	0	0	0
IGLV3-21	0	0	0	0	1	0	0	1	0
IGLV4-69	0	0	0	0	0	1	0	0	0
IGLV5-37	0	0	1	0	0	1	1	0	0
IGLV6-57	0	0	1	0	0	0	0	0	0
IGLV7-43	0	0	0	0	0	0	1	0	0
IL17B	1	0	0	0	1	0	0	1	1
IL18R1	0	0	0	0	0	0	1	0	0
INSC	1	0	0	0	0	1	1	0	0
IQGAP3	1	0	1	1	1	0	0	0	0
IRF4	1	0	0	0	0	0	0	0	0
IRF6	1	1	1	1	1	1	0	0	0
ISM1	0	1	0	0	0	0	0	0	0
ITGA2B	0	0	0	0	0	0	1	0	0
ITGAM	1	1	1	0	0	1	1	0	0
ITM2C	0	0	0	0	1	0	0	0	0
JSRP1	1	0	1	0	1	1	1	1	0
KCNH8	0	1	0	0	0	1	0	0	0
KCNJ2-AS1	1	0	0	0	0	0	0	0	0
KCP	0	0	0	0	0	1	0	0	0
KCTD19	0	0	0	0	1	0	1	0	0
KDELC1	1	0	1	0	1	0	0	1	0
KDELR3	0	0	1	0	0	0	0	0	0
KIAA0101	0	0	0	0	0	0	1	0	0
KIAA1462	0	0	0	0	0	1	0	0	0
KIAA1524	1	1	0	0	1	0	1	0	0
KIF14	0	0	0	0	1	0	0	0	0
KIF15	0	0	0	0	0	0	0	0	1
KIF23	0	0	0	0	0	0	1	0	0
KIFC1	0	0	0	0	1	0	0	0	0
KIFC3	0	0	0	0	0	0	0	1	0
KIT	1	0	0	0	0	0	0	0	0
KL	1	0	1	0	0	0	0	0	0
KLHDC8B	0	0	0	0	0	1	0	1	0
KNL1	0	0	0	0	0	0	1	0	0
KRT7	0	0	0	0	0	0	0	1	0
LA16c-306A4.2	1	0	0	0	1	0	0	0	0
LA16c-OS12.2	0	0	0	0	0	0	0	1	0
LAMC1	1	0	0	0	0	0	0	0	0
LCN2	0	0	0	0	0	1	0	0	0
LEF1-AS1	0	0	0	0	0	0	0	0	1
LGALS2	1	0	1	0	1	1	0	0	1
LGALSL	1	1	0	0	0	1	0	0	0
LHFP	0	0	0	0	0	1	0	0	0
LILRA4	0	0	0	0	0	1	0	0	0
LINC00534	0	0	1	0	0	0	0	0	0
LINC00671	0	0	1	0	0	0	0	0	0
LINC01093	1	0	0	0	0	0	0	0	0
LINC01337	0	0	1	0	0	0	0	0	0
LMAN1	0	0	0	0	0	1	0	0	0
LMNB1	1	0	0	0	0	0	0	0	0
LPP-AS2	1	1	1	0	0	1	1	1	1
LRRC36	0	0	0	1	0	0	0	0	0
LSMEM2	1	1	0	0	0	0	0	0	0
LTK	0	0	1	1	0	1	0	1	0
LY6E	0	0	0	0	1	0	0	0	0
LYPD2	0	0	0	1	1	0	0	0	0
MACC1	1	1	0	0	0	1	1	0	0
MAD2L1	0	0	0	0	0	0	0	0	1
MAFG	0	0	0	0	0	0	1	0	0
MAN1A1	1	1	1	0	0	1	1	0	0
MAP7	0	0	0	0	0	1	0	0	0
MARC1	0	0	0	0	0	0	1	0	0
MARCKS	0	0	0	0	0	0	0	1	0
MCEMP1	0	0	0	0	0	0	0	0	1
MCM2	0	0	0	0	0	0	1	0	0
MCM4	0	0	1	0	0	0	0	0	0
MCM6	1	0	0	0	0	0	1	1	0
MDGA1	0	0	0	0	1	0	0	0	0
MDS2	0	0	0	0	1	0	0	0	0
MEG3	1	0	0	0	1	0	0	0	1
MELK	0	0	0	0	0	0	0	1	0
MELTF	0	0	0	0	0	0	0	0	1
METTL7B	0	0	0	0	0	0	1	0	0
MGAM	1	0	0	0	0	0	0	0	0
MGAM2	0	1	0	0	0	0	0	0	0
MIR23A	0	1	0	0	0	0	0	0	0
MIR373	1	0	0	0	0	0	0	0	0
MIR503HG	0	0	1	0	0	0	0	0	0
MIR589	1	0	0	0	0	1	0	0	0
MIR657	0	0	1	0	0	0	0	0	0
MIR93	1	1	0	0	1	1	0	0	0
MIXL1	1	0	0	0	0	0	0	0	0
MKRN2OS	1	0	0	1	1	0	0	0	0
MMP9	0	0	0	0	0	1	0	0	0
MS4A14	0	0	0	0	0	0	0	1	0
MS4A4A	0	0	0	0	0	0	1	0	0
MYBPH	1	0	0	0	0	0	1	0	1
MYO1D	0	0	0	0	0	0	1	0	0
NACAP3	0	0	0	0	0	0	0	1	0
NAPSB	1	0	0	0	0	0	0	1	0
NDC80	0	0	0	0	0	0	1	0	0
NDRG2	0	1	0	0	1	0	0	0	0
NECAB1	1	0	0	0	0	0	0	0	0
NEDD4	1	0	0	0	0	0	0	0	0
NEFL	0	0	0	0	0	0	0	0	1
NEIL3	0	0	1	0	0	0	0	0	0
NEK2	1	0	1	0	1	0	0	0	0
NEURL1	1	0	0	0	0	0	0	0	0
NKPD1	0	0	0	1	0	0	0	0	0
NME1-NME2	1	0	1	0	1	0	1	1	1
NOL3	1	0	1	0	0	1	1	1	1
NOS1AP	0	0	0	0	0	1	1	0	0
NOTCH3	0	0	0	0	0	0	0	1	0
NR4A1	0	0	0	0	1	0	0	0	0
NRN1	0	0	0	0	1	0	0	1	0
NUGGC	1	0	1	1	1	1	1	1	0
NUSAP1	0	0	1	0	0	0	0	0	0
NWD1	0	1	0	0	0	0	0	0	0
OASL	1	0	0	0	0	0	0	0	0
OIP5	0	0	0	0	1	0	0	0	0
OLFM1	1	0	0	0	0	1	0	0	1
OLR1	0	0	1	1	0	1	0	0	0
OPLAH	0	0	0	0	0	0	0	1	0
ORC6	1	0	0	0	0	0	0	0	0
OVCH1	1	0	0	0	0	0	0	0	0
OXCT2	0	0	1	0	0	0	0	0	0
OXTR	0	0	0	0	0	0	0	1	0
PAGE2B	0	0	0	1	0	0	0	0	0
PCAT1	1	0	0	0	1	0	1	1	0
PHC1P1	0	1	0	1	0	0	0	0	0
PHF24	0	1	0	0	0	0	0	0	0
PHKA1	0	0	0	0	1	0	0	0	0
PHLDA2	0	0	0	0	0	1	0	0	0
PHLDA3	0	0	1	0	1	0	1	0	0
PID1	1	0	0	0	0	1	0	0	0
PIF1	1	0	0	0	1	0	1	0	0
PLA2G7	0	0	0	0	0	0	0	0	1
PLAU	0	0	1	0	0	0	0	0	0
PLD4	0	0	0	0	0	0	0	0	1
PLEKHH2	1	0	1	0	1	0	0	0	0
PLEKHH3	0	0	0	0	0	1	0	0	0
PLK4	0	1	0	0	0	0	0	0	0
PLOD2	0	0	0	0	0	0	0	1	0
PLPP3	1	1	0	0	0	1	1	0	0
PLS3	0	1	1	0	0	0	0	0	1
PLXNA4	0	0	1	0	0	0	0	0	0
POC1A	0	0	0	0	1	0	0	0	0
POLE2	0	0	0	1	0	0	0	0	0
POLQ	1	0	0	0	0	0	0	0	0
POTEE	1	0	1	0	0	0	0	1	0
POU2AF1	1	0	0	0	1	0	1	1	0
PPARG	0	0	0	0	0	0	0	0	1
PPFIA4	1	0	0	0	0	0	0	0	0
PRC1	1	0	0	0	0	0	0	0	0
PRKCDBP	0	0	0	0	0	1	0	0	0
PRRG1	0	0	0	0	0	0	0	1	0
PRTN3	1	0	0	1	0	0	0	0	0
PRUNE2	0	0	0	0	0	0	0	0	1
PSAT1	0	0	0	0	0	0	0	1	0
PTGFR	1	1	1	0	1	0	0	0	1
PTGFRN	0	0	0	0	0	0	1	0	0
PTGR1	0	0	0	0	0	0	1	0	0
PTTG1	0	0	0	0	0	0	0	0	1
QPCT	0	0	1	0	0	1	0	1	0
RAB19	0	0	1	0	0	0	0	0	0
RACGAP1	0	0	0	0	0	1	0	0	0
RAD51	0	0	0	0	0	0	0	0	1
RAD51AP1	0	1	1	0	1	0	0	0	0
RAD54L	0	0	0	0	0	1	0	0	0
RAPGEF5	0	0	0	0	0	0	1	0	0
RASGRF1	1	0	0	0	0	0	0	0	0
RECQL4	1	0	0	0	0	0	0	0	0
RGS16	0	1	0	0	0	0	0	0	0
RN7SL2	1	0	0	0	0	0	0	0	0
RNASE1	0	0	0	0	0	0	1	0	0
RNU2-27P	0	0	1	0	0	0	0	0	0
RNU6-226P	1	1	0	0	0	0	0	0	0
RORC	1	0	0	0	0	0	0	0	0
RP1-152L7.5	0	0	0	0	1	0	0	0	0
RP1-28O10.1	1	0	0	0	0	0	0	0	0
RP11-104L21.2	0	0	0	0	1	0	0	0	0
RP11-1070N10.3	1	0	1	0	1	1	1	1	0
RP11-1081L13.4	1	0	0	0	0	1	0	0	1
RP11-1228E12.1	1	1	0	0	0	1	1	1	1
RP11-127L20.3	1	0	0	0	0	0	0	0	0
RP11-12M9.4	0	0	0	0	0	0	0	0	1
RP11-139H15.5	0	0	0	0	0	1	0	0	0
RP11-13N13.6	0	1	0	0	0	0	0	0	0
RP11-13P5.1	0	0	0	0	1	0	0	0	0
RP11-142E9.1	1	0	0	0	0	0	0	0	0
RP11-154D6.1	1	1	0	0	0	0	0	0	0
RP11-166N6.3	1	0	0	0	0	0	0	0	0
RP11-169K17.3	0	0	0	0	0	0	1	0	0
RP11-181E10.3	1	0	0	0	0	0	0	0	0
RP11-182J1.18	0	0	0	0	0	0	0	0	1
RP11-195M16.3	1	1	0	0	0	1	1	0	0
RP11-214O1.3	1	0	0	0	0	0	0	0	0
RP11-219G17.4	0	0	1	0	0	1	1	0	1
RP11-240E2.2	1	0	0	0	0	0	0	0	0
RP11-24F11.5	0	0	1	0	0	0	0	0	0
RP11-254F19.4	0	1	0	0	0	0	0	0	0
RP11-266K4.14	1	0	0	0	0	0	0	0	0
RP11-286N22.14	1	1	0	0	1	0	0	0	1
RP11-295K3.1	0	0	0	0	0	0	0	1	0
RP11-304L19.1	0	0	0	0	1	0	0	0	1
RP11-307L3.2	0	0	0	0	0	0	1	1	0
RP11-317P15.4	0	0	0	0	0	0	1	0	0
RP11-349I1.2	1	0	0	0	0	0	1	0	0
RP11-352D3.2	1	0	0	0	0	0	0	0	0
RP11-356C4.6	1	1	0	0	0	0	0	0	0
RP11-36C20.1	1	0	0	1	0	0	0	0	1
RP11-392E22.9	0	0	0	1	1	0	0	1	1
RP11-395B7.4	1	1	0	1	1	0	0	0	0
RP11-401L13.4	0	1	0	0	0	0	0	0	0
RP11-407N17.5	1	0	0	0	0	0	0	0	0
RP11-415F23.2	0	0	0	0	1	0	0	0	0
RP11-455F5.3	0	1	0	0	0	0	0	0	0
RP11-455F5.4	1	0	0	0	0	0	0	0	0
RP11-464D20.2	0	0	0	0	0	0	0	0	1
RP11-47G11.2	0	1	1	0	0	1	0	0	0
RP11-497G19.7	1	0	0	0	0	0	1	0	1
RP11-497H16.7	0	0	0	0	0	0	1	0	0
RP11-502I4.3	1	0	0	0	0	0	0	0	0
RP11-531H8.1	1	0	0	0	0	0	0	0	0
RP11-531H8.2	1	0	0	0	0	0	0	0	0
RP11-542M13.3	1	0	0	0	1	0	0	0	1
RP11-571L19.8	0	0	0	0	1	0	0	0	1
RP11-57A19.2	1	0	0	0	0	0	0	0	0
RP11-612B6.2	0	0	1	0	0	0	0	0	0
RP11-664D1.1	1	1	0	0	1	0	0	0	0
RP11-665G4.1	0	0	0	0	0	0	0	1	0
RP11-70P17.1	0	0	1	0	0	0	0	0	0
RP11-791G15.2	1	0	0	0	0	0	0	0	0
RP11-798M19.3	1	1	1	0	0	0	1	0	0
RP11-807H22.5	0	0	0	0	0	0	0	1	0
RP11-840I19.5	0	0	0	0	0	0	0	1	0
RP11-848G14.5	0	0	0	0	0	0	0	1	0
RP11-84G21.1	0	0	1	0	0	0	0	0	0
RP11-92K2.2	0	0	0	0	0	0	0	0	1
RP11-946L16.2	0	1	0	0	0	0	0	0	0
RP11-958N24.2	1	0	0	0	1	0	0	0	0
RP11-968O1.5	0	0	0	0	0	1	0	0	0
RP13-714J12.1	1	0	0	0	0	0	0	0	1
RP4-568C11.4	1	0	0	0	0	0	0	0	0
RP4-612B15.3	0	1	0	0	0	0	0	0	0
RP4-635E18.7	0	0	0	0	1	0	0	0	0
RP4-655J12.4	0	0	1	0	0	1	0	1	0
RP4-725G10.3	0	0	0	0	0	1	0	0	0
RP4-794H19.1	0	0	0	0	0	0	0	1	0
RP4-800G7.3	0	0	0	0	0	1	0	0	0
RP5-1119A7.14	0	0	0	0	0	0	1	0	0
RPGRIP1	0	1	0	0	0	1	0	0	0
RPS12P20	1	0	0	0	0	1	1	1	0
RPS20P14	0	0	0	1	0	0	0	0	0
RRM2	0	0	0	0	0	0	0	1	0
RSPH1	0	0	0	0	0	1	0	0	0
RTN1	0	0	0	0	0	1	0	0	0
RTN3P1	0	0	0	0	0	0	1	0	0
S100A12	0	0	0	0	1	0	0	0	0
SCART1	0	0	0	1	0	0	0	1	0
SCN2B	0	1	1	0	0	0	1	0	1
SCN5A	1	0	0	0	0	0	0	0	0
SDC1	0	0	0	0	0	1	0	0	0
SEC14L3	0	0	0	1	1	0	0	0	0
SEC24A	1	1	1	0	1	0	1	0	0
SEMA5A	0	0	0	1	0	0	0	0	0
SERINC2	1	0	1	0	0	0	1	1	0
SERPINB10	0	0	1	0	0	0	0	0	0
SEZ6L	0	0	0	1	0	0	0	0	0
SFRP1	1	1	0	0	0	0	0	0	0
SFRP2	0	0	0	1	0	0	0	0	0
SGO1	1	0	0	0	0	0	0	0	0
SH3RF3-AS1	0	0	0	0	0	1	0	0	0
SHCBP1	0	0	1	0	0	0	0	0	0
SIGLEC17P	1	1	0	0	0	0	0	0	0
SIGLEC5	0	0	0	0	0	0	0	1	0
SIRPAP1	1	0	0	0	0	1	1	1	0
SIX5	0	0	0	0	0	0	0	1	0
SKA1	0	0	0	0	0	0	0	1	0
SLC1A3	1	0	0	0	0	0	0	0	0
SLC1A4	1	0	0	0	1	1	1	1	1
SLC25A10	0	0	0	0	0	0	0	1	0
SLC26A8	1	1	1	0	0	1	1	1	0
SLC27A2	1	0	0	0	0	0	0	0	0
SLC2A3	0	0	0	0	0	0	0	1	0
SLC2A4	0	0	0	1	0	0	0	0	0
SLC39A5	0	0	0	0	0	0	0	1	0
SLC39A8	1	0	1	0	0	0	1	1	1
SLC4A11	0	0	0	0	0	0	1	0	0
SLC4A3	0	0	0	0	0	0	1	0	0
SLC7A11	1	0	1	0	0	1	1	0	0
SLC8A1-AS1	1	1	0	0	0	0	0	0	0
SLCO2B1	1	0	0	0	0	0	0	1	0
SLCO4A1	0	0	0	0	0	0	1	0	0
SLIT1	0	1	0	0	0	0	0	0	0
SLPI	0	0	0	0	0	0	0	1	0
SMTNL1	0	0	0	0	0	0	0	1	0
SNORD94	0	0	1	0	0	0	0	0	0
SPAG4	0	0	0	0	0	1	0	0	0
SPATA20P1	0	0	0	0	0	0	1	0	0
SPC25	0	0	0	0	0	0	1	0	0
SRPK1	0	0	1	0	0	0	0	0	0
SRSF12	1	1	1	0	0	0	0	0	0
STIL	0	0	1	0	0	0	0	0	0
STMN1	0	0	0	0	0	0	0	1	0
STRCP1	1	0	0	0	0	0	0	1	1
SUCNR1	1	0	0	0	0	0	1	0	0
SUGT1P3	1	0	1	0	1	0	0	0	0
SYN1	1	0	0	1	0	0	0	1	0
SYN2	0	0	0	0	0	0	1	0	0
SYT17	1	0	0	0	0	0	0	0	0
TACR2	1	0	0	0	0	0	0	0	0
TARM1	0	0	1	0	0	0	0	0	0
TAS1R3	0	0	0	0	1	0	0	0	0
TCONS_00029157	1	0	0	0	0	0	0	0	0
TCTN1	0	1	0	0	0	0	0	0	0
TDRD9	1	1	1	0	0	1	1	0	0
TFPI	1	0	0	0	0	0	0	0	1
TICRR	1	0	1	0	1	1	1	0	0
TIFAB	0	0	0	0	1	1	0	0	0
TIGD3	0	1	0	0	0	0	0	0	0
TIMM10	0	0	1	0	0	0	0	0	0
TM4SF19-AS1	0	0	0	0	0	0	0	0	1
TMC2	0	1	0	0	0	0	0	0	0
TMEM119	0	0	0	0	0	1	0	0	0
TMEM240	0	0	0	0	1	0	0	0	0
TMEM38A	1	1	1	0	0	1	1	0	1
TMTC1	0	0	0	0	0	0	0	0	1
TNFRSF13B	0	0	0	0	0	0	0	1	0
TNFRSF21	1	0	0	0	0	1	1	1	0
TNNT1	1	0	1	1	0	1	1	1	0
TOP2A	0	0	0	0	0	0	1	0	0
TPPP3	0	0	0	0	1	1	0	0	0
TPRG1-AS1	0	0	0	0	0	0	1	0	0
TPX2	1	0	0	0	1	1	0	1	1
TRAJ1	0	0	0	0	1	0	0	0	0
TRAV12-1	1	0	0	1	1	1	0	0	1
TRBJ1-2	0	0	0	0	1	0	0	0	0
TRBV10-3	0	0	0	0	0	0	0	0	1
TRBV11-2	0	0	0	1	0	0	0	0	0
TRBV2	1	0	0	0	0	0	0	0	0
TRBV29-1	0	0	0	0	1	0	0	0	0
TRBV6-4	0	0	0	1	1	0	0	0	0
TRBV6-6	0	0	0	0	1	0	0	0	0
TRDV2	1	0	0	1	0	0	1	0	0
TRIM9	0	1	0	0	0	0	0	0	0
TRIP13	0	0	0	0	1	0	1	1	1
TSHR	0	1	0	0	0	0	0	0	0
TSPEAR	1	0	0	0	0	0	0	0	0
TSPEAR-AS1	0	1	0	0	0	0	0	0	0
TSPEAR-AS2	0	1	0	0	0	0	0	0	0
TTC25	0	0	0	1	1	0	0	0	0
TTC9	1	1	0	0	0	0	0	0	0
TTK	1	0	1	0	1	0	0	0	1
TUBB2A	0	0	0	1	0	0	0	0	0
TXNDC2	0	0	0	0	0	0	0	1	0
TXNDC5	0	0	0	0	0	0	0	1	0
TYMS	0	0	0	0	1	0	0	0	0
U91328.22	0	0	0	0	0	1	0	0	0
UBE2J1	0	1	0	0	0	0	0	0	0
UCKL1-AS1	0	0	0	0	0	0	0	0	1
UNC5A	0	0	0	0	0	1	0	0	0
VMO1	1	0	0	0	0	0	0	1	0
VNN1	0	0	0	0	0	0	1	0	0
WASF1	0	0	0	0	0	1	0	0	0
WDR34	0	0	0	0	0	0	0	1	0
WDR86-AS1	1	1	1	0	1	0	0	0	1
WI2-1896O14.1	1	0	0	0	0	0	0	0	0
WNT7A	1	0	0	0	1	0	0	0	0
XRCC2	1	1	0	0	0	0	0	0	1
YBX2P1	1	1	1	0	0	1	1	0	0
ZBTB32	0	0	0	0	1	0	0	0	0
ZDHHC1	0	0	0	0	0	1	0	0	0
ZDHHC11B	1	0	0	1	0	0	0	0	1
ZG16B	0	0	0	0	1	0	0	0	0
ZNF192P1	0	0	0	0	1	0	0	0	0
ZNF215	0	0	0	0	1	0	0	0	0
ZNF32-AS1	0	0	0	0	1	0	0	0	0
ZNF577	1	0	0	0	0	0	0	0	0
ZNF703	0	0	0	0	0	0	0	1	0
ZNF835	0	0	0	0	0	0	0	1	0
ZWINT	0	0	0	0	0	0	1	0	0
ABCA17P	0	0	0	1	1	0	0	0	0
ABCB1	0	0	1	1	1	0	0	0	0
ABCB4	0	1	0	0	1	1	0	0	0
ABHD11-AS1	0	0	0	0	0	0	1	0	0
ABHD12B	0	0	0	0	0	0	1	0	0
ABLIM2	1	0	1	0	1	0	0	0	0
AC004057.1	0	0	0	0	0	0	0	1	0
AC005307.5	0	0	0	0	1	0	0	0	0
AC005740.6	0	0	0	0	0	0	1	0	0
AC007246.3	0	0	0	0	1	0	0	0	0
AC007278.2	1	1	0	0	0	0	0	0	0
AC007278.3	1	0	0	0	0	0	0	0	0
AC008984.2	0	0	0	0	0	0	0	1	0
AC010492.2	0	0	0	0	0	0	1	0	0
AC010980.2	0	0	0	0	0	1	0	0	0
AC011513.4	0	0	1	0	0	0	0	0	0
AC013264.2	0	0	0	0	0	0	0	0	1
AC016757.3	1	0	0	0	0	0	0	0	0
AC022431.3	1	0	0	0	0	0	0	0	0
AC061992.2	0	0	0	0	0	0	1	0	0
AC068134.10	0	0	1	0	0	0	0	0	0
AC068282.3	0	0	0	0	0	1	0	0	0
AC068580.5	0	0	0	0	0	0	1	0	0
AC079767.4	1	0	0	1	1	1	0	1	0
AC103563.9	0	0	0	0	0	0	0	0	1
AC137932.6	0	0	0	0	0	0	1	1	0
ACAP2-IT1	1	0	0	0	0	0	0	0	0
ACE	0	0	0	1	0	0	0	0	0
ACER1	1	0	1	1	0	1	0	1	1
ACKR1	0	0	0	0	0	0	0	1	0
ACOT4	0	0	1	0	0	0	0	0	0
ACSL4	1	1	1	0	0	0	0	0	0
ACTG1P3	0	1	0	0	0	0	0	0	0
ADAM12	1	0	0	0	0	0	0	0	0
ADAM28	1	0	0	0	0	0	0	0	0
ADAMTS10	1	0	0	0	0	0	0	0	0
ADCK1	1	0	0	0	0	0	0	0	0
ADGRA3	1	0	1	0	1	0	1	0	1
ADM5	0	0	0	0	1	0	0	0	0
ADRA2A	1	0	0	0	0	0	0	0	0
AE000661.37	0	1	0	0	0	0	0	0	0
AEBP1	0	0	0	0	1	0	0	0	0
AF131216.6	1	0	0	0	0	0	0	0	0
AFF3	1	0	0	0	0	0	0	0	0
AGBL5-IT1	1	0	0	0	1	0	1	0	0
AHSP	0	0	0	1	0	0	0	0	0
AICDA	1	0	0	0	0	0	0	0	0
AIM2	0	0	0	0	0	0	1	0	0
AJUBA	0	1	0	0	0	0	0	0	0
AKR1C4	0	0	0	0	1	0	0	0	0
AKR7A3	1	0	0	0	0	0	0	0	0
AL022344.7	0	0	0	0	0	1	0	0	0
AL022476.2	0	0	0	0	1	0	0	0	0
AL133243.2	0	1	0	0	0	0	0	0	0
ALAS2	0	0	0	1	0	0	0	0	0
ALCAM	1	1	1	0	0	0	0	0	0
ALOX12P2	0	1	0	0	0	0	0	0	0
ALPL	0	0	0	0	0	0	1	1	0
AMIGO1	0	0	1	0	0	0	0	0	0
AMOT	0	1	0	0	0	0	0	0	0
ANGPTL6	0	0	0	0	1	0	0	0	0
ANKS6	0	0	1	0	0	0	0	0	1
AP001052.1	0	0	0	0	0	1	0	0	0
AP001063.1	0	1	0	0	0	0	0	0	0
AP001434.2	0	1	0	0	0	0	0	0	0
AP3B2	1	0	0	0	0	0	1	1	0
APBA2	0	0	0	0	1	0	0	0	0
APBB1	0	0	1	0	0	0	0	0	0
APBB2	1	0	0	0	0	0	1	1	1
APOA2	1	1	1	0	0	1	1	1	0
ARG2	0	0	0	0	0	0	1	0	0
ARHGAP11A	1	0	1	0	1	0	1	0	1
ARHGEF10L	0	0	0	0	0	0	1	0	0
ARHGEF37	0	0	0	1	0	0	0	0	0
ARHGEF4	1	0	0	0	0	0	0	0	0
ARL4AP2	0	0	0	0	0	0	0	1	0
ARNTL2	1	0	0	0	0	0	0	0	0
ARVCF	1	0	0	0	0	0	0	1	1
ASB9	1	0	0	0	0	0	0	0	0
ASPDH	1	0	0	0	0	0	0	0	0
ATAD2	0	0	0	0	0	0	0	0	1
ATG9B	0	0	0	1	0	0	0	0	0
ATP13A3	0	0	1	0	0	0	0	0	0
ATP6V0E2-AS1	1	0	0	1	0	0	0	0	0
ATP8B4	1	1	1	0	0	1	0	0	0
AURKC	1	0	0	0	0	0	0	0	0
AXIN2	0	0	0	0	1	0	0	0	0
AZIN2	0	0	0	0	0	0	0	0	1
AZU1	0	0	1	0	0	0	0	0	0
B3GNT7	0	0	0	0	0	0	0	1	0
BACH2	0	1	0	0	0	0	0	0	0
BAIAP3	1	1	0	0	0	1	1	0	0
BCL2A1	1	1	0	0	1	0	0	0	1
BCL7A	0	0	0	0	1	0	0	0	0
BEND5	0	0	0	0	0	0	1	0	0
BEX5	0	1	0	0	0	0	0	0	0
BHLHA15	0	0	0	0	1	0	0	0	0
BLK	0	1	0	0	0	0	0	0	0
BOK	1	0	1	0	1	0	0	1	1
BPGM	0	0	0	1	0	0	0	0	0
BPI	1	0	0	0	0	0	0	0	0
BTBD19	0	0	0	0	0	0	0	1	0
BTBD6P1	0	0	0	0	0	1	0	0	0
BTBD8	1	0	0	0	0	0	1	0	0
BUB1B	0	0	1	0	1	0	1	1	1
C10orf35	0	0	1	0	1	0	0	1	1
C11orf42	0	0	1	0	0	0	0	0	0
C11orf45	0	0	0	0	0	0	0	1	0
C15orf54	0	0	0	0	1	0	0	0	0
C15orf65	0	0	1	0	0	0	0	0	0
C16orf59	0	0	1	0	0	0	0	0	0
C17orf97	0	0	0	0	0	1	0	0	0
C19orf33	0	0	0	0	0	1	0	0	0
C1orf106	0	0	0	0	0	1	0	0	0
C1orf127	0	0	0	0	0	0	1	0	0
C1orf226	1	0	1	0	0	1	1	1	0
C1QA	0	0	0	0	0	0	0	1	0
C1QC	0	0	0	0	0	0	0	1	0
C22orf15	0	0	0	0	1	0	0	0	0
C2orf50	0	0	0	0	0	0	1	0	0
C2orf81	0	0	0	0	0	1	0	0	0
C3orf18	0	0	0	0	0	0	0	0	1
C7orf25	0	0	0	0	0	1	0	0	0
C8orf88	0	1	0	0	0	0	0	0	0
C9orf72	0	0	1	0	0	0	0	0	0
CA11	1	0	0	0	0	0	0	0	0
CABP5	0	0	0	0	0	0	1	0	0
CACNA2D2	0	0	0	0	0	0	0	1	0
CALML6	1	0	0	1	0	0	0	0	1
CALY	1	0	0	0	0	0	0	0	0
CAMK2N1	1	0	0	1	1	0	0	0	0
CAPN14	1	1	0	0	1	1	0	0	0
CAPN5	0	0	0	1	0	0	0	0	0
CARMIL1	0	0	0	0	0	1	0	0	0
CARNS1	0	0	0	0	0	0	0	0	1
CASS4	0	1	0	0	0	0	0	0	0
CATSPERG	1	0	0	0	0	0	0	0	0
CAV1	0	0	1	0	0	0	0	0	0
CBLN3	0	0	0	0	0	0	0	0	1
CBS	0	1	0	0	0	0	0	0	0
CC2D2A	0	0	1	0	0	0	0	0	0
CC2D2B	1	1	1	0	0	0	1	0	0
CCDC150	1	0	0	1	1	0	0	0	1
CCDC180	0	0	0	1	0	0	0	0	0
CCDC36	0	0	0	0	0	1	0	0	0
CCDC78	1	0	0	0	0	0	0	0	0
CCER2	0	0	0	0	0	0	0	0	1
CCL28	1	1	1	0	1	0	0	0	1
CCNB3	1	0	0	0	1	0	0	0	0
CCPG1	0	0	0	0	0	1	0	0	0
CCR3	0	0	1	0	0	0	0	0	0
CD19	1	0	1	0	1	0	1	1	0
CD1A	0	0	0	0	0	1	0	0	0
CD1C	0	0	0	1	0	0	0	0	0
CD22	0	0	0	0	0	1	0	0	0
CD24	1	1	1	1	0	1	0	0	0
CD247	1	0	0	0	0	0	0	0	0
CD274	1	1	1	0	0	1	1	1	1
CD300LD	1	0	0	0	0	0	0	0	0
CD36	1	0	0	0	0	0	1	0	0
CD4	0	0	0	0	0	0	0	0	1
CD40LG	1	0	1	0	1	0	0	0	1
CD72	1	1	0	0	1	1	1	1	0
CD74	0	0	0	0	1	1	1	0	1
CD79A	1	1	0	0	0	1	1	0	0
CD79B	0	0	1	0	1	1	1	1	0
CDC20	0	0	1	0	0	0	1	1	1
CDC25A	1	0	0	0	0	0	0	0	0
CDC37L1-AS1	0	0	0	0	1	0	0	1	0
CDC42BPG	0	0	0	0	0	0	1	0	0
CDC7	0	0	0	0	1	0	0	0	0
CDCA2	1	0	1	0	0	1	1	1	1
CDCA3	0	0	0	0	1	0	0	0	0
CDCA5	0	0	0	0	0	0	0	0	1
CDCP1	1	0	1	0	0	1	1	1	0
CDH13	0	1	0	0	0	0	0	0	0
CDHR3	0	0	0	1	1	0	0	0	0
CDIP1	0	0	0	0	0	0	0	0	1
CDK20	0	0	0	0	1	0	0	0	0
CDON	0	0	0	0	1	0	0	0	0
CDT1	1	0	1	0	1	0	0	0	1
CDYL2	0	0	1	0	0	1	1	0	1
CELF2-AS1	0	1	0	0	0	0	0	0	0
CELSR1	0	0	1	0	0	1	1	1	0
CEND1	1	0	1	0	0	0	1	0	0
CENPU	1	0	0	0	1	0	0	0	1
CFAP73	1	0	0	1	1	0	0	0	0
CH17-224D4.1	1	0	0	0	0	0	0	0	0
CH17-224D4.2	0	0	1	0	1	1	0	1	0
CH507-9B2.3	1	0	0	0	0	0	0	0	0
CH507-9B2.5	1	0	0	0	0	0	0	0	0
CHADL	1	0	0	0	0	1	1	1	0
CHCHD6	1	0	0	0	0	0	0	0	1
CIB2	1	0	0	0	0	0	0	0	0
CIT	0	0	0	0	0	1	0	0	0
CKS2	0	0	0	0	1	0	0	0	0
CLCN4	1	1	0	0	0	1	1	0	0
CLEC10A	1	0	0	1	1	1	0	1	1
CLEC12A	0	1	0	0	0	0	1	0	0
CLEC3B	1	0	0	0	0	0	1	1	1
CLEC6A	1	1	1	0	0	0	0	0	1
CLIC5	1	1	1	0	0	0	0	0	0
CLIC6	0	0	0	0	0	0	0	1	0
CLK2P1	0	0	0	0	0	1	0	0	0
CMTM1	1	1	0	0	0	0	0	0	0
CNGA4	0	0	0	0	0	1	0	0	0
CNGB1	1	0	1	0	0	0	0	0	0
CNN2P1	0	1	0	0	0	0	1	0	0
CNR2	1	0	1	0	1	1	0	0	0
COL6A1	1	0	0	0	1	0	1	1	1
COL6A2	0	0	0	1	0	0	0	0	0
COLQ	0	0	0	0	1	0	0	0	0
COPZ2	1	0	0	0	1	0	0	0	0
COQ10A	0	0	0	0	1	0	0	0	0
CPNE4	1	0	0	0	0	0	0	0	0
CR2	0	1	0	0	0	0	0	0	0
CREB5	1	1	0	0	0	1	1	0	0
CSGALNACT2	0	0	0	0	0	1	0	0	0
CSNK1A1L	1	0	0	0	0	0	0	0	0
CSPG4P10	0	0	1	0	0	0	0	0	0
CTA-113A6.2	1	1	0	0	0	0	0	0	0
CTA-212A2.1	0	0	0	0	0	0	1	0	0
CTA-253N17.1	0	1	0	0	0	0	0	0	0
CTA-292E10.8	0	0	0	0	0	0	0	1	0
CTB-114C7.4	1	0	0	0	0	1	0	0	0
CTB-131B5.5	0	0	1	0	0	0	0	0	0
CTB-161C1.1	1	0	0	0	0	0	0	0	0
CTB-31N19.3	0	1	1	0	0	0	1	0	0
CTB-75G16.3	0	0	0	0	0	0	0	0	1
CTC-260F20.3	1	0	0	0	0	0	0	0	0
CTC-281F24.3	1	1	0	0	1	0	0	0	0
CTC-303L1.1	1	0	0	0	0	0	0	0	0
CTC-378H22.2	0	0	0	0	0	0	0	0	1
CTC-448F2.6	0	0	0	1	0	0	0	0	0
CTC-457L16.1	0	1	0	0	0	0	0	0	0
CTC-543D15.8	0	0	0	0	1	0	0	0	0
CTC-559E9.1	0	1	0	0	0	0	0	0	0
CTC-563A5.2	0	0	0	0	0	1	0	0	0
CTD-2012K14.8	1	1	0	1	1	1	0	0	0
CTD-2026K11.5	1	0	0	0	0	0	0	0	0
CTD-2026K11.6	0	0	0	0	0	0	1	0	0
CTD-2047H16.2	0	0	0	0	0	0	0	1	0
CTD-2165H16.3	1	0	0	0	0	0	0	0	0
CTD-2342J14.6	1	1	1	0	1	0	0	0	1
CTD-2589M5.5	0	0	0	0	0	1	0	0	0
CTD-2619J13.3	0	0	0	0	1	0	0	0	0
CTD-2619J13.8	1	0	0	0	0	0	0	0	0
CTD-2619J13.9	0	0	0	0	0	0	1	1	1
CTD-3035K23.6	1	1	0	0	0	1	0	0	1
CTD-3094K11.1	1	1	1	0	0	0	1	1	0
CTSF	0	0	0	0	0	0	0	1	0
CTSG	1	0	0	0	0	0	0	0	0
CXCL6	0	0	0	0	0	1	0	0	1
CXCR5	0	0	0	1	1	1	0	0	0
CYP1B1-AS1	0	0	0	0	0	0	1	0	0
CYP2E1	0	0	0	0	0	0	0	1	0
CYP2S1	0	0	0	0	0	1	0	0	0
CYP2U1	0	1	0	0	0	0	0	0	0
CYSTM1	0	0	0	0	0	0	0	1	0
CYYR1	1	0	0	0	0	0	0	0	0
DBH-AS1	1	0	0	1	1	0	0	1	1
DCAF4	0	0	1	0	0	0	0	0	0
DCAF4L1	0	0	0	0	0	0	1	0	0
DEFA3	0	1	0	0	0	0	0	0	0
DEFA4	0	0	1	0	0	0	0	0	0
DEGS2	1	0	0	1	1	0	0	0	0
DEPDC1B	1	1	1	1	1	0	0	0	1
DGKK	0	0	0	0	1	0	0	0	0
DHFRP1	0	0	0	0	1	0	0	0	0
DHRS3	0	0	1	0	0	0	0	0	0
DIAPH3	0	0	0	0	0	1	0	0	0
DISP1	0	0	1	0	0	0	0	0	0
DISP3	0	0	0	0	0	0	1	0	0
DLG2	1	0	0	0	0	0	0	0	0
DLG5	0	0	0	0	1	0	0	0	0
DLL1	0	0	0	0	0	1	0	0	0
DMKN	0	0	0	0	1	0	0	1	1
DNAI2	0	0	0	0	1	0	0	0	0
DNAJC3-AS1	1	0	1	0	0	1	0	0	0
DOCK4	0	0	1	0	0	0	0	0	0
DOK7	0	0	0	0	1	0	0	0	0
DPRXP2	0	0	0	0	0	0	1	0	0
DPY19L1P1	0	0	1	0	0	0	0	0	0
DRAM1	1	1	1	0	0	1	1	1	1
DSCC1	0	1	0	0	0	0	0	0	0
DTX1	0	0	0	0	0	0	0	1	0
DUTP6	0	0	1	1	1	0	0	0	0
DYNLL1P4	1	0	0	0	0	0	1	0	0
DYRK3	0	0	0	0	0	0	0	1	0
DYSF	0	0	0	0	0	0	0	1	0
DZIP1L	0	1	0	1	0	0	0	0	0
E2F1	0	0	0	0	0	1	0	0	0
ECT2	1	0	0	0	0	0	0	0	0
EDEM3	1	1	1	0	0	1	0	0	0
EGFL8	0	0	0	1	1	0	0	0	1
EIF4EP1	0	1	0	0	0	0	0	0	0
EMB	0	0	1	0	0	0	0	0	0
ENKUR	1	1	0	0	0	0	0	0	0
EPAS1	0	1	0	0	0	1	1	1	0
ERBB2	0	0	1	0	0	0	0	0	0
ERG	0	0	0	1	0	0	0	0	0
ESPL1	0	0	1	0	0	0	0	0	0
ETNK2	0	0	0	0	1	0	0	0	0
EVA1C	1	0	0	0	0	0	0	0	1
EVI2A	0	0	1	0	0	0	0	0	0
EXOC6	0	0	0	0	0	0	1	0	0
F8	0	1	1	0	0	0	1	1	0
FAAH	0	0	0	0	0	0	0	0	1
FAAHP1	1	0	0	0	0	0	0	1	0
FAM102A	0	0	0	0	1	0	0	0	0
FAM129C	0	0	0	0	1	0	0	0	0
FAM153A	0	0	0	1	0	0	0	0	0
FAM160B1	1	0	0	0	0	0	0	0	0
FAM171A1	0	0	0	0	0	0	0	1	0
FAM212B-AS1	0	1	0	0	0	1	1	0	0
FAM27E3	0	0	0	0	0	0	0	0	1
FAM64A	0	0	1	0	0	1	1	0	0
FAM86EP	0	0	0	0	0	0	1	0	0
FAR1	1	1	1	0	0	1	0	0	0
FBLN2	0	0	0	0	1	0	0	0	0
FBN1	0	0	0	0	1	0	0	0	0
FCER2	0	0	0	0	0	1	0	0	0
FCGBP	0	0	0	0	0	0	0	1	0
FCGR1A	0	0	0	0	0	1	0	0	0
FCGR1CP	1	0	1	0	0	1	1	1	0
FCMR	1	0	0	0	0	0	0	0	0
FCRL3	0	0	0	0	1	0	0	0	0
FCRLA	1	1	0	0	1	1	1	1	0
FECH	1	0	0	0	0	0	0	0	0
FERMT2	0	0	0	0	0	0	0	1	0
FEZ1	0	0	0	0	1	0	0	0	0
FFAR3	1	0	1	0	0	0	1	0	0
FGD4	0	0	0	0	0	0	1	0	0
FGF22	0	0	0	1	0	0	0	0	0
FKBP5	0	1	0	0	0	0	0	0	0
FKBP9	0	0	0	0	0	1	0	0	0
FLT1	1	0	0	0	0	1	0	0	0
FLT4	1	0	0	0	0	0	0	0	0
FOLR2	1	0	0	0	0	0	0	0	0
FOLR3	0	0	1	0	0	0	1	0	0
FOXN2	0	1	0	0	0	0	0	0	0
FTCDNL1	0	0	1	0	0	0	0	0	0
FUOM	0	0	0	0	0	0	1	0	0
FUT2	1	1	1	0	1	0	0	0	0
GADD45G	0	0	1	0	0	1	1	1	0
GALNT12	1	1	0	0	0	0	0	0	0
GALNT3	0	1	0	0	0	0	0	0	0
GALNT8	0	0	0	0	0	0	1	0	0
GAPDHP60	0	0	1	0	0	1	1	1	1
GAS6-AS1	0	0	1	0	0	0	0	0	0
GATA3	1	0	0	0	0	0	0	0	0
GCLM	0	0	0	0	0	1	1	0	0
GFRA2	0	0	0	0	0	0	0	1	0
GGH	0	1	1	0	0	1	0	0	0
GGT5	1	0	0	0	0	0	0	0	0
GGT7	0	0	0	0	0	0	0	0	1
GLDN	1	1	1	0	0	0	0	0	0
GLS2	0	0	0	1	1	0	0	0	1
GMPR	1	0	0	0	0	0	0	0	0
GNAZ	1	0	0	0	0	1	1	0	0
GNG10	1	0	0	0	0	0	0	0	0
GNG12-AS1	1	0	0	0	0	0	0	0	0
GNRHR2	0	0	0	0	1	0	0	0	0
GPER1	0	0	0	0	0	0	1	0	0
GPR150	0	0	1	0	0	0	0	0	0
GPR161	0	0	1	0	0	0	0	0	0
GPR17	0	0	0	0	0	1	0	0	0
GPR173	0	0	0	0	0	1	0	0	0
GPR84	0	0	1	0	0	0	0	0	0
GPRASP1	0	0	0	0	1	0	0	0	0
GRM2	1	0	0	1	0	0	0	0	0
GS1-259H13.2	0	0	0	0	0	1	0	0	0
GS1-72M22.1	1	0	0	0	0	0	0	0	0
GSG1L	0	0	0	0	0	0	1	0	0
GSG2	1	0	0	0	1	1	1	1	1
GTF2H2	0	0	0	0	0	0	1	0	0
GTF2IRD1	1	0	0	0	1	0	0	0	0
GTSCR1	0	0	0	0	1	0	0	0	0
GTSE1	0	0	1	0	0	0	0	0	0
GUCY2D	0	0	0	0	0	0	1	0	0
GYPB	1	0	0	1	0	0	0	1	0
H1FX-AS1	0	0	0	0	1	0	0	0	0
HAS3	0	0	0	0	0	0	0	1	0
HBD	0	0	0	1	0	0	0	0	0
HEMGN	1	0	0	0	0	0	0	0	0
HEPACAM2	0	0	0	1	0	0	0	0	0
HERC2P3	0	1	0	0	0	0	0	0	0
HEY2	1	0	0	0	0	0	0	0	0
HGD	1	0	0	0	0	0	0	0	0
HIGD1B	1	0	0	0	1	0	0	1	0
HIST1H2BD	0	0	0	0	0	1	0	0	0
HIST1H2BE	0	0	0	0	0	1	0	0	0
HIST1H3E	0	0	0	0	0	1	0	0	0
HIST1H4K	0	0	0	0	0	0	1	0	0
HIST2H2BF	0	0	0	0	0	1	0	0	0
HJURP	0	0	0	0	0	1	0	0	0
HKDC1	0	1	1	0	1	0	0	0	1
HLA-DMA	0	0	0	0	1	1	1	1	1
HLA-DMB	0	0	0	0	0	0	0	1	0
HLA-DOA	0	0	0	0	0	0	0	1	0
HLA-DOB	1	0	0	0	0	0	0	0	0
HLA-DPA1	0	0	0	0	0	0	0	1	0
HLA-DPB1	0	0	0	0	0	0	0	1	0
HLA-DQB1	0	0	0	0	0	0	1	0	0
HLA-DQB1-AS1	0	0	0	0	0	0	0	1	0
HLA-DRA	0	0	0	0	0	1	0	0	0
HLA-DRB1	0	0	0	0	1	0	0	0	0
HMGB2	0	0	1	0	1	0	0	0	0
HMGB3	0	0	0	0	0	0	1	0	0
HMP19	0	0	0	0	0	0	1	0	0
HORMAD1	1	0	0	0	0	0	0	0	0
HRAT92	1	0	0	0	0	0	0	0	0
HS3ST3B1	0	0	1	0	0	0	0	0	0
HSD17B3	1	0	0	0	0	0	0	0	1
HSH2D	0	0	0	0	0	1	1	1	0
HTRA3	1	0	0	0	0	0	0	0	0
ICAM2	0	0	0	0	0	0	1	0	0
ID2-AS1	1	0	0	1	1	0	0	1	1
ID3	1	0	0	0	0	0	0	0	0
IFT172	0	0	0	0	1	0	1	0	0
IGHA2	0	0	0	0	0	0	1	0	0
IGHG1	0	0	0	0	0	0	1	0	0
IGHG2	0	0	0	0	0	0	0	1	0
IGHGP	1	0	0	0	0	0	0	0	0
IGHV1-18	1	0	0	0	0	0	0	0	0
IGHV1-46	1	0	0	0	0	0	0	0	0
IGHV3-13	0	0	0	0	0	0	0	1	0
IGHV3-20	0	0	0	0	0	0	1	0	0
IGHV3-23	0	0	0	0	1	0	0	0	0
IGHV3-30	1	0	0	0	0	0	0	0	0
IGHV3-33	0	0	0	0	0	0	0	1	0
IGHV4-4	0	0	0	0	0	0	0	0	1
IGHV5-78	1	0	0	0	0	0	0	0	0
IGHV6-1	0	0	0	0	1	0	0	0	0
IGKV1-16	0	0	0	0	1	0	0	0	0
IGKV1-39	1	1	1	1	0	1	1	0	0
IGKV1-8	0	0	0	0	0	1	0	0	0
IGKV2-28	0	0	0	0	0	0	1	0	0
IGKV5-2	0	0	0	0	0	0	0	1	0
IGLV3-25	1	0	1	0	0	1	1	1	0
IGLV5-52	1	0	0	0	0	0	0	0	0
IGLV7-46	1	0	0	1	0	0	1	0	0
IGSF22	1	0	0	0	0	0	0	0	0
IL11RA	0	0	1	0	0	0	0	0	1
IL17RE	1	0	0	1	1	1	0	1	1
IL18BP	0	0	0	0	1	0	0	0	0
IL1R1	0	1	0	0	0	0	0	0	0
IL23A	1	0	0	0	0	0	0	0	0
IL24	0	0	0	0	1	0	0	0	0
INHBB	1	1	0	0	0	0	0	0	0
IPMK	1	1	0	0	0	1	0	0	0
IPO5P1	0	1	0	0	0	0	0	0	0
IQCK	1	0	1	0	1	1	0	1	0
IRAK3	0	1	0	0	0	0	0	0	0
IRGM	0	0	1	0	1	0	0	0	0
ITGA7	0	0	0	0	0	0	1	0	0
ITGA9	1	0	0	0	0	0	0	0	0
ITGB4	1	0	0	0	0	0	0	0	0
ITIH1	0	0	0	0	0	0	1	0	0
ITPKB-IT1	1	0	0	0	0	0	0	0	0
KALRN	1	0	0	0	0	0	0	0	0
KANK2	0	0	0	1	0	0	0	0	0
KCNE1	0	0	0	0	0	0	1	0	0
KCNE1B	1	0	0	0	0	0	0	0	0
KCNG1	0	1	0	0	0	1	1	0	0
KCNH3	0	1	0	0	0	0	0	0	0
KCNH7	0	0	0	0	0	0	1	0	0
KCNK10	1	0	0	0	1	1	1	1	1
KCNK5	1	0	0	0	0	0	0	0	0
KCNN3	1	0	1	0	1	1	1	0	0
KCNS1	1	0	1	0	1	1	1	1	1
KDF1	1	0	0	0	0	0	0	0	0
KIAA0825	1	1	0	0	0	0	0	0	0
KIAA1614	0	0	0	0	0	0	0	0	1
KIF18A	0	0	1	0	0	0	0	0	0
KIF18B	0	0	0	0	1	0	0	0	0
KIF20A	1	0	1	0	1	1	1	1	1
KIF28P	1	0	0	0	1	1	1	1	0
KIF2C	0	0	0	0	0	0	1	0	0
KIF4A	1	0	0	0	0	0	0	0	0
KIF5C	1	1	1	1	1	0	0	0	0
KIF7	1	0	1	0	1	0	0	0	1
KIR2DS4	0	0	0	0	0	0	0	1	0
KIR3DL1	0	0	0	1	0	0	0	0	0
KLF5	0	1	0	0	0	0	0	0	0
KLHDC8A	0	0	0	0	0	1	0	1	0
KNDC1	0	0	0	0	0	1	0	0	0
KRT73-AS1	0	0	0	1	1	0	0	1	1
KRT8	1	0	0	0	0	0	0	0	0
KRT8P26	0	1	0	0	0	0	0	0	0
KTN1-AS1	0	0	1	0	0	0	0	0	0
LACTB2-AS1	0	0	0	0	1	0	0	0	0
LARGE2	0	1	0	0	1	1	0	0	0
LAT	1	0	1	0	0	0	0	1	1
LCN10	1	0	0	0	0	0	0	0	0
LCN12	0	0	1	0	0	0	0	0	0
LCNL1	0	0	0	0	0	0	0	0	1
LDHAP3	0	0	0	0	0	0	1	0	0
LDLRAD2	0	0	0	0	0	0	0	1	0
LDOC1	0	0	0	0	0	1	0	0	0
LGALS4	0	0	0	0	0	0	1	0	0
LILRA5	0	0	0	0	0	1	0	0	0
LIM2	1	0	1	0	0	0	0	0	1
LIN7A	0	1	0	0	0	0	0	0	0
LINC00092	1	0	1	0	1	1	1	1	1
LINC00235	0	1	0	0	0	0	0	0	0
LINC00346	0	0	0	0	1	1	0	0	1
LINC00402	0	0	0	0	1	0	0	0	0
LINC00482	0	1	0	0	0	0	0	0	0
LINC00494	0	1	0	1	1	1	0	0	0
LINC00598	1	1	0	0	0	1	0	0	0
LINC00862	0	1	0	0	0	0	0	0	0
LINC00926	1	1	0	0	1	1	0	1	0
LINC00989	0	0	0	0	0	1	0	0	0
LINC00996	1	0	0	0	0	0	0	0	0
LINC01012	0	0	0	0	0	0	0	0	1
LINC01119	1	0	0	0	0	0	0	0	0
LINC01150	0	0	0	0	0	0	0	0	1
LINC01220	0	0	0	0	0	1	0	0	0
LINC01314	1	0	0	0	0	0	0	0	0
LINC01554	0	0	0	0	0	0	1	0	0
LINC01624	0	0	0	0	1	0	0	1	1
LIPC	0	0	0	0	0	0	1	0	0
LOXHD1	0	0	1	0	0	0	0	0	0
LPAR5	0	0	1	0	0	0	0	0	0
LPO	1	0	0	0	0	0	0	0	0
LRRC2	0	0	0	1	0	0	0	0	0
LRRC43	1	0	1	0	1	0	0	0	0
LRRC70	0	1	0	0	0	0	0	0	0
LRRN1	1	0	0	0	0	0	0	0	0
LSMEM1	0	1	0	0	0	0	0	0	0
LSR	1	0	0	0	0	0	0	0	0
LTBP3	1	0	0	0	0	0	0	0	0
LTF	1	0	0	0	0	1	0	0	0
LY96	1	1	1	0	0	0	0	0	0
LYRM9	0	1	0	0	0	0	0	0	0
MAB21L3	0	0	0	0	0	1	0	0	0
MAN1C1	0	0	1	0	0	0	0	0	0
MAPK6	0	0	0	0	0	1	0	0	0
2022-03-09	0	0	0	0	1	0	0	0	0
MATK	0	0	1	1	0	0	0	0	0
MATN1-AS1	0	1	0	0	0	0	0	0	0
MB21D2	0	1	0	0	0	0	0	0	0
MBOAT2	0	0	0	0	0	1	0	0	0
MCF2L	1	1	1	0	1	1	0	0	1
MCM10	0	0	0	0	0	1	0	0	0
MCTP1	0	0	1	0	0	0	0	0	0
MERTK	0	0	0	0	0	1	0	0	0
MGC45922	0	0	0	0	0	0	0	1	0
MID2	0	0	0	0	0	1	0	0	0
MIR320E	0	0	0	0	0	1	0	0	0
MIR339	0	0	0	0	0	0	0	0	1
MIR34A	1	0	0	0	0	0	1	1	0
MIR371B	1	0	0	0	0	1	0	0	0
MIR4477B	0	1	1	0	0	0	0	0	0
MIR4538	0	0	0	0	1	0	0	0	0
MIR600HG	1	1	0	0	0	0	0	0	0
MKI67	0	0	0	0	0	0	1	0	0
MKNK1-AS1	1	1	0	0	0	1	0	0	0
MMP11	1	0	0	0	1	1	0	1	1
MOCS1	0	0	0	0	1	0	0	0	0
MORN3	0	0	1	0	0	0	0	0	0
MPP7	0	0	1	0	0	0	0	0	0
MT-ATP6	0	0	0	0	1	1	0	1	1
MT-ATP8	1	0	0	0	0	0	0	0	0
MT-CO1	0	0	0	0	1	0	0	0	0
MT-ND1	0	0	0	0	1	0	0	0	0
MT-ND2	1	0	0	0	0	0	0	0	0
MT-ND4	1	0	0	0	1	1	1	1	1
MT-ND5	0	0	0	0	0	0	0	1	0
MT-ND6	0	0	0	0	0	0	1	0	0
MT-TE	0	0	0	0	0	0	0	1	0
MT-TG	1	0	0	0	0	0	0	0	0
MT-TP	1	0	0	0	0	0	0	0	0
MT-TS1	0	0	0	0	1	0	0	0	0
MTATP6P1	0	0	0	0	0	1	0	0	0
MTND4P12	1	0	0	1	1	1	0	1	0
MUC12	1	0	0	0	0	0	0	0	0
MUC6	1	0	0	1	1	0	0	1	0
MXRA8	0	0	0	0	0	0	0	1	0
MYBL2	0	0	1	0	0	0	0	0	0
MYEOV	0	0	0	0	1	0	1	0	0
MYLPF	1	0	0	1	1	0	0	1	1
N4BP3	1	1	0	0	1	1	1	0	0
NAB2	0	1	0	0	0	0	0	0	0
NACA2	1	1	1	0	0	1	0	0	0
NAMPT	1	0	0	0	0	0	0	0	0
NAMPTP1	0	0	0	0	0	0	1	1	0
NAT8B	0	1	0	0	0	0	1	1	0
NCALD	0	0	0	0	1	0	0	0	0
NCR3	0	0	0	0	0	0	0	1	0
NCS1	0	0	0	0	1	0	0	0	0
NDN	1	0	0	0	0	0	0	0	0
NDUFB3	0	0	0	0	1	0	0	0	0
NEFM	1	0	1	0	1	0	0	0	0
NEIL1	0	1	0	0	0	0	0	0	0
NELL2	0	0	0	0	0	0	0	0	1
NEO1	1	0	1	0	1	0	0	0	0
NHLH1	0	0	0	0	0	0	1	0	0
NLGN2	1	0	0	0	0	0	0	0	0
NMNAT2	0	0	0	0	0	0	0	1	0
NMUR1	1	0	0	0	0	0	0	0	0
NOXA1	1	0	1	0	0	0	0	1	0
NPAS1	0	0	1	0	0	0	0	0	0
NPIPA1	0	0	0	0	1	0	0	0	0
NPIPB5	1	0	0	0	0	0	0	0	0
NPM1P25	0	1	0	0	0	0	0	0	0
NPM2	0	0	0	0	0	0	0	0	1
NPTXR	0	0	0	0	0	0	0	0	1
NQO2	0	1	0	0	0	0	0	0	0
NR1D1	0	0	0	0	0	0	0	1	0
NR1I3	0	0	1	0	0	0	0	0	0
NR3C2	0	1	0	0	0	0	0	0	0
NRXN2	0	0	0	0	1	0	0	0	0
NSG1	0	0	0	0	0	0	0	1	0
NSUN7	0	1	0	0	0	0	0	0	0
NT5E	0	0	0	0	0	1	0	0	0
NTN4	0	0	0	1	1	0	0	1	0
NTN5	1	0	0	0	0	0	0	0	0
NUP50-AS1	0	0	0	0	0	0	0	0	1
NXN	1	0	0	0	0	0	0	0	0
NXNL2	1	0	0	0	0	0	0	0	0
OCM	0	0	0	0	1	0	1	1	1
ODCP	0	1	0	0	0	0	0	0	0
OMG	0	0	0	0	0	0	1	0	0
OR7E94P	0	0	0	0	0	1	0	0	0
OSBPL8	0	1	0	0	0	0	0	0	0
OSM	0	0	0	0	0	0	1	0	0
OVGP1	0	0	0	0	1	0	0	0	0
P2RY1	0	0	1	0	0	0	0	0	0
P3H3	0	0	0	0	0	0	0	0	1
P3H4	0	0	0	0	1	0	0	0	0
PABPC3	0	0	1	0	0	0	0	0	0
PAG1	1	0	0	0	0	0	0	0	0
PAOX	0	0	0	0	1	0	0	0	0
PAQR6	0	0	0	0	0	0	1	0	0
PAQR7	1	0	0	0	0	0	0	0	0
PARVA	1	1	0	0	1	0	0	0	0
PAX5	0	0	0	0	0	0	1	0	0
PCSK4	1	0	0	0	0	0	0	0	0
PDCD1	0	0	1	1	1	0	0	0	1
PDGFB	0	0	0	0	0	0	0	1	0
PDZD4	0	1	0	0	0	0	0	0	0
PECR	0	0	0	0	0	1	0	0	0
PGAP3	0	0	0	0	0	0	0	0	1
PGLYRP1	0	0	1	0	0	0	0	0	0
PGM5	1	0	0	0	0	0	0	0	0
PHACTR3	0	0	0	0	0	1	0	0	0
PI16	1	0	1	0	0	0	0	0	0
PILRB	1	0	0	0	0	0	0	0	0
PIP5KL1	1	0	0	0	0	0	0	0	0
PIR	0	0	0	0	0	0	0	0	1
PKD1L3	1	0	0	0	0	0	0	0	0
PKMYT1	1	0	1	0	0	1	1	1	1
PLA2G2D	0	0	0	0	0	0	1	0	0
PLA2G4B	0	0	0	0	0	0	1	0	0
PLCH2	0	0	0	0	0	0	0	1	1
PLEK2	0	0	0	1	0	0	0	0	0
PLEKHB1	0	0	0	0	0	0	1	0	0
PLEKHG4	0	0	0	0	1	0	0	0	0
PLEKHG5	1	0	0	0	0	0	0	0	0
PLK1	0	0	0	0	0	0	0	1	0
PLSCR2	1	0	0	0	0	0	0	0	0
PLVAP	0	0	0	1	0	0	0	0	0
PLXDC1	0	0	0	0	1	0	0	0	0
PNPLA7	1	0	0	0	0	1	0	1	1
PODN	0	0	0	1	0	0	0	0	0
POPDC2	0	0	0	0	0	0	0	1	0
POU5F1B	0	0	1	0	0	0	0	0	0
POU6F1	0	0	0	0	0	0	1	0	0
PP2D1	1	1	0	0	0	0	0	0	0
PPM1J	0	0	0	0	1	1	1	1	1
PPP1R12A	0	1	0	0	0	0	0	0	0
PPP4R2	0	1	0	0	0	1	0	0	0
PRDM11	1	0	1	0	0	0	0	0	0
PRICKLE1	1	0	0	0	0	0	0	0	0
PROCR	1	0	1	0	1	0	1	1	0
PROS1	0	1	0	0	0	0	0	0	0
PRR29-AS1	0	0	0	0	0	0	0	0	1
PRRT4	1	0	0	0	0	0	0	0	0
PRSS23	0	0	1	0	0	0	0	0	0
PRSS30P	0	0	1	0	0	0	0	0	0
PTAR1	0	0	1	0	0	0	0	0	0
PTGIR	0	0	0	0	0	0	1	0	0
PTH2R	0	0	0	0	0	1	0	0	0
PTK7	1	0	0	1	1	1	0	1	0
PTPRS	1	1	0	0	0	0	0	0	0
PXDC1	0	0	0	0	0	0	0	0	1
PYCR1	0	0	0	0	1	0	0	0	0
PYGL	1	0	0	0	0	1	1	1	0
RAB25	1	0	0	0	1	1	1	1	0
RAB33B	1	1	1	0	0	1	1	0	0
RAD54B	1	1	1	1	1	0	0	0	0
RAMP1	0	0	0	0	0	1	0	0	0
RASA4	1	1	0	0	1	0	1	0	1
RASIP1	0	0	0	0	1	0	0	0	0
RBFOX3	1	0	0	1	1	0	0	1	1
RBM44	0	1	0	0	0	0	0	0	0
RHOXF1-AS1	1	0	0	0	1	0	0	0	0
RIOK3	1	0	0	1	0	0	0	0	0
RIPK4	1	0	0	0	0	0	0	0	0
RN7SKP16	1	0	0	0	0	0	0	0	0
RN7SL574P	1	0	0	0	0	0	0	0	0
RNASE2	1	0	0	0	1	1	1	1	1
RNASE3	0	0	1	0	0	0	0	0	0
RND2	0	0	0	0	0	1	0	0	0
RNF224	1	0	0	0	0	0	0	1	0
RNU6-196P	1	0	0	0	0	0	0	0	0
RNU6-322P	0	1	0	0	0	0	0	0	0
RNU6-516P	1	0	0	0	1	0	0	1	1
RNU6-646P	1	1	0	0	0	1	0	0	0
RNU6ATAC35P	0	1	0	0	0	0	0	0	0
RNY3P8	0	0	0	0	1	0	0	0	0
ROCK1	0	1	0	0	0	0	0	0	0
RP1-178F15.4	0	0	0	0	0	1	0	0	0
RP1-225E12.2	0	0	0	0	0	1	0	0	0
RP1-239B22.5	1	0	1	0	1	0	1	1	1
RP11-1036E20.9	0	0	0	0	0	1	0	0	0
RP11-1191J2.5	0	0	0	1	0	0	0	0	0
RP11-119D9.1	0	0	0	1	0	0	0	0	0
RP11-119F19.5	0	1	0	0	0	0	0	0	0
RP11-1391J7.1	1	0	0	0	1	0	0	0	1
RP11-139H15.7	0	1	1	0	0	1	1	0	0
RP11-150D20.5	0	0	0	1	0	0	0	0	0
RP11-153M7.5	0	0	1	0	0	0	0	0	0
RP11-154J22.1	0	1	0	0	0	0	0	0	0
RP11-159N11.4	0	0	0	0	1	0	0	0	0
RP11-161M6.2	0	0	0	0	1	0	0	0	0
RP11-161M6.3	1	0	1	0	1	0	0	0	1
RP11-162D16.2	0	0	0	0	0	0	0	1	0
RP11-175P19.2	0	0	1	0	0	0	0	0	0
RP11-185E8.1	1	0	0	0	0	0	0	0	0
RP11-196G18.3	1	1	1	0	0	1	1	1	1
RP11-1C1.4	0	0	0	0	0	0	0	0	1
RP11-203J24.8	0	0	0	0	0	0	0	1	0
RP11-203M5.6	1	0	0	0	0	0	0	0	0
RP11-211G3.3	0	1	0	0	0	0	0	0	0
RP11-216L13.19	1	0	0	0	0	0	0	0	0
RP11-218E20.5	1	0	0	0	0	0	0	0	0
RP11-223A3.1	0	1	0	0	0	0	0	0	0
RP11-228B15.4	1	0	0	0	0	0	0	1	1
RP11-231C14.7	1	0	0	0	0	0	0	0	0
RP11-23J9.5	0	0	1	0	0	0	0	0	0
RP11-242C19.2	0	0	1	0	0	0	0	0	0
RP11-250B2.6	0	0	0	1	1	0	0	0	0
RP11-264B17.3	1	0	0	0	0	0	0	0	0
RP11-284F21.10	1	0	1	0	1	0	1	1	1
RP11-290F5.2	1	0	0	0	0	0	0	0	0
RP11-295P9.12	0	1	0	0	0	0	0	0	0
RP11-307E17.8	1	0	0	0	0	0	0	0	0
RP11-313D6.3	0	1	0	0	0	0	1	0	0
RP11-321E2.3	0	0	0	0	0	0	1	0	0
RP11-324E6.10	0	0	0	0	1	0	0	0	0
RP11-325I22.3	1	1	0	1	0	0	0	0	0
RP11-326C3.15	1	1	1	0	0	0	1	0	0
RP11-329N15.3	0	0	0	0	0	0	1	0	0
RP11-330O11.3	0	0	0	0	0	0	1	0	0
RP11-333E1.2	0	0	1	0	0	0	0	0	0
RP11-33E12.2	0	0	0	0	0	0	0	0	1
RP11-33I11.3	0	0	0	0	0	0	1	0	0
RP11-347C12.3	0	0	0	0	0	0	1	0	0
RP11-351I24.1	1	1	1	0	0	1	1	0	0
RP11-365D23.4	0	0	0	0	0	1	0	0	1
RP11-379B18.5	0	0	1	0	0	0	0	0	0
RP11-394O4.3	1	0	0	0	1	0	1	1	1
RP11-396M11.1	0	0	0	0	0	0	1	1	0
RP11-409K20.7	0	0	1	0	0	0	0	0	0
RP11-40A7.2	1	0	0	0	0	1	1	1	0
RP11-416N2.4	0	0	1	0	1	0	0	0	0
RP11-423H2.1	1	0	0	0	0	0	0	0	0
RP11-428K3.1	0	0	1	0	0	0	0	0	0
RP11-430K21.2	0	0	0	0	0	0	0	1	0
RP11-445N20.2	1	0	0	0	0	0	0	0	0
RP11-445P17.3	1	1	1	0	0	1	1	0	0
RP11-446N19.1	0	0	0	0	1	0	0	0	0
RP11-44F14.10	0	0	0	0	0	0	1	0	0
RP11-44F14.2	0	1	0	0	0	0	0	0	0
RP11-44F14.4	1	0	0	0	0	1	1	0	0
RP11-44F14.8	0	0	0	0	0	1	0	0	0
RP11-44F14.9	0	1	0	0	0	0	0	0	0
RP11-454E5.4	0	0	1	0	0	0	0	0	0
RP11-45A17.4	0	0	0	0	0	1	0	0	0
RP11-465L10.10	1	0	0	0	0	0	1	1	0
RP11-485G7.6	1	0	0	0	0	0	0	0	0
RP11-488C13.5	1	0	1	0	1	0	1	0	1
RP11-496I9.1	0	0	1	0	0	0	0	0	0
RP11-498C9.12	0	0	0	0	0	0	1	0	0
RP11-499E18.1	0	0	1	1	0	1	1	0	1
RP11-501J20.5	1	0	0	0	0	0	0	0	0
RP11-504I13.3	1	1	1	0	0	0	0	0	0
RP11-511B23.2	0	0	0	0	0	1	1	0	0
RP11-521B24.3	0	0	0	0	0	0	0	0	1
RP11-524F11.1	1	0	0	0	0	0	0	0	0
RP11-556I13.2	1	0	0	0	0	0	0	0	0
RP11-563N4.1	0	0	0	0	0	1	0	0	0
RP11-563N6.6	1	0	0	0	0	0	0	0	0
RP11-564A8.4	0	0	0	0	1	0	0	0	0
RP11-564A8.8	0	0	0	1	0	0	0	0	0
RP11-568J23.8	1	0	0	0	1	1	0	1	0
RP11-572M11.3	1	0	1	0	1	0	0	0	1
RP11-588L15.2	1	0	0	0	0	0	0	0	0
RP11-597D13.7	1	0	0	0	0	1	0	1	0
RP11-613F7.1	0	0	0	0	1	0	0	0	0
RP11-61N20.3	0	0	0	0	0	0	0	0	1
RP11-620J15.1	0	0	0	1	0	0	0	0	0
RP11-627G23.1	0	0	0	0	1	0	0	0	0
RP11-641D5.1	0	0	0	0	1	0	0	0	0
RP11-647K16.1	1	0	0	0	0	0	0	0	0
RP11-65J3.15	0	0	0	0	0	0	1	0	0
RP11-661A12.5	1	0	0	0	0	1	0	0	0
RP11-673E1.3	1	0	1	0	1	0	1	0	0
RP11-676J12.4	1	0	1	1	1	0	0	0	0
RP11-686D22.5	0	0	0	0	0	0	1	0	0
RP11-687F6.5	0	1	0	0	0	0	0	0	0
RP11-6I2.3	1	0	0	0	0	0	0	0	1
RP11-705O1.8	0	0	1	0	0	0	0	0	0
RP11-707P17.2	0	0	1	0	0	0	0	0	0
RP11-70C1.1	0	1	0	0	0	0	0	0	0
RP11-727F15.9	0	1	0	0	1	0	0	0	0
RP11-73K9.3	0	0	0	1	0	0	0	0	0
RP11-744N12.3	0	0	0	0	0	1	0	0	0
RP11-75C10.6	0	0	0	0	0	0	0	0	1
RP11-770G2.2	1	0	0	0	0	0	0	0	0
RP11-83A24.2	0	0	0	0	0	1	0	0	0
RP11-849F2.5	0	0	0	0	0	0	0	0	1
RP11-981G7.1	0	0	0	0	0	0	0	0	1
RP11-98D18.3	1	0	1	0	1	0	1	1	1
RP13-467H17.1	0	0	0	0	1	0	0	0	0
RP2	0	1	0	0	0	0	0	0	0
RP4-535B20.4	0	0	0	0	0	0	1	0	0
RP4-545C24.1	1	1	1	1	1	1	0	0	0
RP4-584D14.6	0	0	1	0	0	0	0	0	0
RP4-613B23.1	1	1	0	0	0	1	1	1	0
RP4-657E11.10	1	1	0	0	1	0	0	0	0
RP4-665N4.8	1	0	0	0	0	0	0	0	0
RP4-669P10.20	0	0	0	0	0	0	0	1	0
RP4-756G23.5	0	0	1	0	0	0	0	0	0
RP4-800G7.2	0	0	0	0	1	0	0	0	0
RP4-816N1.8	0	0	0	0	1	0	0	0	0
RP5-1009E24.9	0	0	0	0	1	0	0	0	0
RP5-827C21.1	0	0	1	0	0	0	0	0	0
RP5-890E16.2	1	0	1	0	1	1	1	0	1
RP5-902P8.10	0	0	0	0	0	0	0	1	0
RP5-943J3.1	0	0	0	0	0	0	0	1	0
RP5-994D16.9	1	1	1	0	0	0	0	0	0
RP5-997D24.3	0	0	0	0	1	0	0	0	0
RP5-998N21.4	0	0	1	0	0	0	0	0	0
RPL10P16	0	0	0	0	0	0	0	0	1
RPL23AP2	0	0	0	0	0	0	0	0	1
RPL30P7	1	1	0	0	0	0	1	0	0
RPL37AP1	1	0	0	0	0	0	0	0	0
RPS23P10	1	0	0	0	0	0	0	0	0
RPS28P7	0	0	0	0	1	0	0	0	0
RPS3AP43	0	0	0	0	1	0	0	0	0
RPS4XP22	0	1	1	0	0	0	0	0	0
RPSAP18	1	0	1	1	1	0	0	0	0
RTEL1P1	0	0	0	0	0	0	0	0	1
RTKN	0	0	0	0	1	0	0	0	0
S100A8	1	1	1	1	0	0	0	0	1
S100A9	1	1	1	0	0	1	1	0	1
S1PR5	0	0	0	1	0	0	0	0	0
SAMD15	0	1	0	0	0	0	0	0	0
SAMSN1	0	0	1	0	0	0	0	0	0
SATB2	0	0	0	0	0	0	0	1	0
SBK1	0	0	0	0	1	0	0	0	0
SCD	0	0	0	0	0	0	1	1	0
SCG5	0	0	0	0	1	0	0	0	0
SCN4A	1	0	0	0	0	0	0	0	0
SCN9A	0	0	0	0	0	0	0	0	1
SCT	1	0	0	0	0	0	0	0	0
SDK2	0	0	1	0	0	0	1	0	0
SDR42E2	0	1	0	0	0	0	0	0	0
SEC14L5	1	0	0	0	0	0	0	0	0
SEC1P	1	0	0	0	1	0	0	0	0
SELENBP1	0	0	0	1	0	0	0	0	0
SELM	0	0	0	0	1	0	0	0	0
SEMA3C	1	0	0	0	0	0	0	0	0
SEMA4F	0	0	0	0	0	0	0	1	0
SERF1B	0	0	0	1	0	0	0	0	0
SERPINH1	1	0	0	0	0	0	0	0	0
SEZ6	0	0	0	0	0	0	1	0	0
SGCA	0	0	0	0	1	0	0	0	0
SGK223	0	0	0	0	1	0	0	0	0
SGMS2	0	1	0	0	0	1	0	0	0
SGO2	1	1	0	0	1	0	0	0	0
SGSM1	1	0	0	0	0	0	0	0	0
SH3GLB1	0	0	0	0	0	0	0	1	0
SH3RF2	1	0	1	0	1	0	0	0	1
SIAH2	0	0	0	0	0	0	0	1	0
SIDT1	0	0	0	0	1	0	0	0	0
SIRT4	0	0	0	0	0	1	0	0	0
SKA3	0	0	0	0	0	0	0	1	0
SLC12A3	1	0	0	0	0	0	0	0	0
SLC12A8	1	0	0	0	0	0	0	0	0
SLC16A11	1	0	0	0	0	0	0	0	0
SLC16A2	1	0	1	1	0	0	0	0	0
SLC16A4	1	0	0	0	0	1	0	1	0
SLC22A13	0	0	0	0	1	0	0	0	0
SLC22A14	1	1	0	0	0	1	1	0	0
SLC22A4	1	1	0	0	0	1	1	0	0
SLC30A1	0	0	1	0	0	1	0	0	0
SLC37A3	1	0	0	0	0	0	0	0	0
SLC38A11	0	0	0	0	1	0	0	0	0
SLC38A2	0	0	1	0	0	0	0	0	0
SLC4A1	0	0	0	1	0	0	0	0	0
SLC4A9	1	0	0	0	0	0	0	0	0
SLC9A3	0	0	0	0	1	0	0	0	0
SLF1	0	0	0	0	1	0	0	0	0
SLITRK4	1	0	0	0	0	0	0	0	0
SMPD4P1	0	0	0	0	0	1	0	0	0
SMPDL3A	0	0	0	0	0	0	1	0	0
SMYD5	0	0	0	0	0	0	0	1	0
SNCA	0	0	0	1	0	0	0	0	0
SNED1	0	1	0	0	0	0	0	0	0
SNORA27	0	0	0	0	0	1	0	0	0
SNORA3B	1	0	0	0	1	0	1	0	0
SNORA5C	1	0	1	1	1	0	0	0	0
SNORD83A	1	0	1	0	1	1	0	1	0
SNORD99	1	0	1	1	0	0	1	1	1
SNX16	0	0	1	0	0	0	0	0	0
SNX22	1	1	0	0	0	1	0	0	0
SOAT2	0	0	0	0	1	0	0	0	0
SORBS2	0	0	1	0	0	0	0	0	0
SORBS3	0	0	0	0	0	0	0	0	1
SOX13	0	0	0	0	1	1	0	0	0
SOX8	0	0	0	0	1	0	0	0	0
SPAG5	1	0	0	0	0	0	0	0	0
SPATA3-AS1	0	0	0	1	0	0	0	0	0
SPATA32	0	0	0	0	0	0	1	0	0
SPDYE12P	1	0	0	0	0	0	0	0	0
SPIB	1	0	0	0	0	0	0	0	0
SPON1	0	0	1	1	0	0	0	0	1
SPTA1	0	0	0	1	0	0	0	1	0
SPTB	1	0	0	1	0	1	0	0	0
SRC	1	0	0	0	1	1	1	1	1
SRGN	1	0	0	0	0	1	0	0	0
SSTR3	0	0	1	0	0	0	0	0	0
ST3GAL4-AS1	0	1	0	0	0	0	0	0	0
ST6GALNAC3	1	1	0	0	0	0	0	0	0
STAC	0	0	0	0	1	0	0	0	1
STAG3L5P	0	0	1	0	1	0	1	0	1
STAG3L5P-PVRIG2P-PILRB	0	0	0	0	0	0	0	0	1
STOM	0	0	0	1	0	0	0	0	0
STON2	0	0	0	0	1	0	0	0	0
STRIP2	0	0	1	1	1	0	0	0	0
SUCLG2P2	1	1	0	0	0	0	1	0	0
SUSD4	1	1	0	0	1	0	0	0	1
SYCP2	0	1	0	0	0	0	0	0	0
SYNGR3	0	0	0	0	1	0	0	0	0
TASP1	1	1	1	0	1	0	0	0	1
TBC1D8B	0	0	0	0	0	1	0	0	0
TCL1A	1	1	0	0	0	1	0	0	0
TCN1	0	0	0	1	0	0	0	0	0
TCTEX1D1	1	1	0	1	0	1	0	0	0
TEF	1	0	0	0	0	0	0	0	0
TERT	0	0	0	0	0	0	1	0	0
TESPA1	0	0	1	0	0	0	0	0	0
TG	0	1	0	0	0	0	0	0	0
TGFA	0	0	0	0	0	1	0	0	0
THA1P	0	0	0	0	0	0	0	1	0
TIFA	1	0	0	0	0	0	1	1	1
TJP3	0	0	0	0	0	0	0	0	1
TK1	1	0	1	0	0	1	0	1	0
TLE2	0	0	0	0	0	0	0	1	0
TMCC2	0	0	0	0	0	0	0	1	0
TMCO3	1	0	0	0	0	0	0	0	0
TMEM132E	0	0	0	0	1	0	0	0	0
TMEM163	0	0	1	0	0	0	0	0	0
TMEM165	0	0	1	0	0	0	0	0	0
TMEM217	0	0	1	0	0	0	0	0	0
TMEM220-AS1	1	0	0	0	0	0	0	0	0
TMEM25	0	0	0	0	0	0	0	1	0
TMEM268	1	0	0	0	0	0	0	0	0
TMEM30B	1	1	1	0	1	0	0	0	0
TMEM56	1	0	0	0	0	0	0	0	0
TMEM8B	0	0	0	0	1	0	0	0	0
TMIGD2	1	0	0	0	0	0	0	0	0
TMOD1	0	0	0	1	0	0	0	0	0
TNFAIP6	1	0	0	0	0	0	0	0	0
TNFRSF13C	1	1	0	0	1	1	1	1	0
TNIP3	1	0	0	0	0	0	0	0	0
TNK1	1	0	1	0	0	0	0	0	1
TNNC1	0	0	0	0	0	0	0	0	1
TNNC2	1	0	0	0	0	0	0	0	0
TNS2	1	0	0	0	1	0	0	0	0
TOX2	0	0	0	0	1	0	0	0	0
TP53INP2	0	1	0	0	0	0	0	0	0
TP73	0	0	0	0	0	1	0	0	0
TPM2	1	0	0	0	0	0	0	0	0
TPPP	0	0	0	0	0	1	0	0	0
TPST1	1	1	1	0	0	1	1	0	0
TRABD2A	0	0	0	0	0	0	0	0	1
TRAV13-2	0	0	1	0	0	0	0	0	0
TRAV19	0	0	1	0	0	0	0	0	0
TRAV26-1	1	0	0	0	0	0	0	0	0
TRAV26-2	0	0	0	0	0	0	0	1	0
TRAV29DV5	1	0	0	0	0	0	0	0	0
TRAV8-2	0	0	0	0	0	0	0	0	1
TRBD1	0	0	0	1	0	0	0	0	0
TRBJ1-1	0	0	0	0	0	0	0	0	1
TRBJ2-4	0	0	0	0	1	0	0	0	0
TRBJ2-6	1	0	0	0	0	0	0	0	0
TRBV11-1	1	0	0	0	0	0	0	0	0
TRBV15	0	0	0	0	0	0	0	0	1
TRBV21-1	1	0	0	0	0	0	1	0	0
TRBV3-1	0	0	1	1	1	0	0	0	0
TRBV4-1	0	0	1	0	1	0	0	0	1
TRBV5-1	1	0	0	1	1	0	0	0	1
TRBV5-4	1	0	0	0	0	0	0	0	0
TRBV6-1	0	0	0	0	1	0	0	0	0
TRBV7-9	0	0	0	0	0	0	0	1	0
TRDC	0	0	0	0	0	0	0	1	0
TRGC1	0	0	0	0	1	0	0	0	0
TRIM74	0	0	0	0	0	1	0	0	0
TRPC2	0	0	0	0	0	1	0	0	0
TSPAN15	0	0	0	0	0	0	1	0	0
TSPAN18	0	0	0	0	0	1	1	1	0
TSPAN2	0	1	0	0	0	0	0	0	0
TSPO2	0	0	0	1	0	0	0	0	0
TSPOAP1	0	0	1	0	1	0	0	0	0
TSPYL2	1	0	0	0	1	0	0	0	1
TTC28	0	1	0	0	0	0	0	0	0
TXN	1	1	1	0	1	0	0	1	1
TXNRD3	0	1	0	0	0	0	0	0	0
UMODL1	0	0	0	1	0	0	0	0	0
UNC5CL	0	0	0	0	1	0	1	0	0
UPK3A	0	0	0	0	1	0	0	0	0
VEGFC	0	0	0	0	0	1	1	1	0
VIPR1	0	0	0	0	0	0	0	0	1
VNN2	1	1	1	0	0	0	1	0	0
VPREB3	0	1	0	0	1	1	1	1	0
WDR11-AS1	0	0	0	0	1	0	0	0	0
WHAMMP3	1	0	0	0	0	0	0	1	0
WI2-87327B8.2	0	0	0	0	0	1	0	0	0
WNK2	1	1	0	0	0	1	0	1	0
WNT1	1	0	0	0	1	0	0	0	1
WNT10A	0	0	0	0	0	0	1	0	0
WNT10B	0	0	0	1	0	0	0	0	0
WNT6	1	0	0	0	0	0	0	0	0
XCL2	0	0	1	0	0	0	0	0	0
Z84812.4	0	0	0	0	0	1	0	0	0
ZBTB46	1	0	0	0	0	0	0	0	0
ZDHHC20	0	1	0	0	0	0	0	0	0
ZFP28	0	0	0	0	0	0	1	0	0
ZIK1	0	0	1	0	0	0	0	0	0
ZNF135	0	1	0	0	0	0	0	0	0
ZNF239	1	0	0	0	0	0	0	0	0
ZNF329	1	0	0	0	0	0	1	0	0
ZNF385C	0	0	0	0	0	1	0	0	0
ZNF418	0	0	0	0	1	0	0	0	0
ZNF438	0	0	0	0	0	0	0	1	0
ZNF496	1	0	1	0	0	0	0	0	1
ZNF528	0	1	0	0	0	0	0	0	0
ZNF528-AS1	0	0	0	0	1	0	0	0	0
ZNF541	0	0	0	0	0	0	0	0	1
ZNF542P	0	0	0	0	1	0	0	0	0
ZNF582-AS1	1	0	0	0	0	0	0	0	0
ZNF608	1	1	0	0	0	0	0	0	0
ZNF773	1	0	1	0	1	1	0	0	0
ZNF793	0	0	0	0	1	0	0	0	0
ZNF853	1	0	1	1	1	0	0	0	0
ZNRF3	0	0	0	0	1	0	0	0	0
ZSCAN18	0	0	0	0	0	1	0	0	0
A1BG	0	0	0	0	1	0	0	0	0
A3GALT2	0	1	0	0	0	0	0	0	0
ABI3BP	0	0	0	0	0	1	0	0	0
AC003075.4	0	0	1	0	1	0	0	1	0
AC005532.5	1	0	0	0	0	0	0	0	0
AC007879.2	1	1	0	0	0	0	0	0	0
AC007880.1	1	1	0	0	0	0	0	0	0
AC009303.2	1	0	0	0	0	0	0	0	0
AC018766.6	0	1	0	0	0	0	0	0	0
AC073063.10	1	1	0	0	0	0	0	0	0
AC079630.2	0	0	0	0	0	0	0	0	1
AC091814.2	0	0	0	0	0	1	0	0	0
AC091878.1	0	1	0	0	0	0	0	0	0
AC092301.3	0	0	0	1	0	0	0	0	0
AC093484.4	0	0	0	0	0	0	0	0	1
AC103563.8	0	0	0	0	1	0	0	0	1
ACHE	1	0	0	1	0	0	0	1	0
ADAM23	0	1	0	0	0	0	0	0	0
ADAMDEC1	0	0	1	0	0	0	0	0	0
ADAMTS1	0	0	0	0	1	0	0	0	0
ADAMTS8	1	0	0	1	1	1	0	0	0
AK3P3	0	1	0	0	0	0	0	0	0
AKAP6	1	1	0	1	1	0	0	0	0
ALDH1L2	0	0	0	0	1	0	0	0	0
AMPH	0	1	0	0	0	0	0	1	0
ANKRD18A	1	0	0	1	1	0	0	0	0
ANKRD2	1	1	0	0	0	0	1	1	0
ANKRD34B	1	0	1	0	0	1	1	1	0
ANKRD9	1	0	0	0	0	0	0	0	0
ANXA3	0	1	0	0	0	0	0	0	0
APOL6	0	0	0	0	0	1	0	0	0
ARHGAP5-AS1	0	1	0	0	0	0	0	0	0
ASTL	0	0	0	0	0	0	0	1	0
ATP1B2	0	0	0	0	0	1	0	0	0
ATP9A	0	1	0	0	0	1	0	1	0
AXL	1	0	0	0	1	0	1	1	1
BATF2	0	0	0	0	0	0	0	0	1
BCAS2P2	1	0	0	1	0	0	0	0	0
BDNF-AS	1	0	0	0	0	0	0	0	0
BRCA1	0	0	0	0	0	0	1	0	0
BRCA2	0	0	0	0	0	0	0	0	1
BTNL9	0	0	0	0	1	0	0	0	0
C11orf65	0	0	0	1	0	0	0	0	0
C14orf132	0	0	0	1	0	0	0	0	0
C19orf18	1	0	0	0	1	0	1	0	0
C1orf194	1	0	0	0	0	0	0	0	0
C4orf19	1	1	0	0	0	0	0	0	0
C8orf31	1	0	0	0	0	0	0	0	0
C8orf46	0	0	1	0	0	0	0	0	0
CACNA1H	0	0	0	0	1	0	0	0	0
CAPN13	0	0	1	0	0	0	0	0	0
CATSPER2	1	0	0	0	0	0	0	0	0
CCDC183	0	0	0	0	0	0	0	0	1
CCDC188	0	0	0	0	0	0	0	0	1
CCDC40	0	0	1	0	0	0	1	0	0
CCDC81	1	0	0	0	0	0	0	0	0
CCM2L	1	0	1	0	0	1	1	1	0
CCNA1	1	0	0	0	0	0	0	0	0
CCNB2	0	0	1	0	0	0	1	0	1
CCNE2	0	0	0	0	0	0	0	0	1
CCR12P	1	0	0	0	0	0	0	0	0
CCR4	1	1	1	0	1	0	0	0	1
CCRL2	0	0	0	0	0	1	0	0	0
CD109	1	0	0	0	0	0	0	0	0
CD160	0	0	0	1	0	0	0	0	0
CD1E	0	1	0	0	0	0	0	0	0
CD209	0	0	0	0	0	1	0	0	0
CD34	0	0	0	1	0	1	0	0	0
CDC25C	0	0	1	0	0	0	0	0	0
CDKL3	0	0	0	0	0	0	0	0	1
CDS1	1	0	0	0	0	0	0	0	0
CEACAM19	0	1	0	0	0	0	0	0	0
CENPM	0	0	0	0	0	0	0	1	0
CEP126	1	1	1	0	1	0	0	0	0
CEP97	0	0	1	0	0	0	0	0	0
CHAC2	0	0	0	1	0	0	0	0	0
CHPF	1	0	0	0	1	1	0	1	0
CHRNA5	0	0	0	0	0	0	1	0	0
CLCF1	1	1	0	1	1	0	0	0	0
CLEC9A	1	0	0	0	0	0	0	0	0
CMKLR1	0	0	0	0	0	0	0	1	0
COL13A1	0	1	0	0	0	0	0	0	0
COL19A1	0	0	0	1	0	0	0	0	0
COLGALT2	1	0	0	0	0	0	0	0	0
CPEB4	0	0	1	0	0	0	0	0	0
CSF1	1	0	1	0	1	1	1	0	0
CTA-384D8.35	0	0	0	0	0	0	1	0	0
CTB-33G10.1	1	0	0	0	0	0	0	0	0
CTC-338M12.1	1	0	0	0	0	0	0	0	0
CTC-439O9.1	0	0	0	0	0	0	0	1	0
CTC-523E23.11	0	0	0	0	1	0	0	0	0
CTC-548K16.6	0	1	0	0	0	0	0	0	0
CTD-2017D11.2	0	0	0	0	1	0	0	0	0
CTD-2192J16.22	0	0	0	0	0	0	0	0	1
CTD-2203K17.1	0	0	0	0	1	0	0	0	0
CTD-2215E18.1	1	0	0	0	0	0	0	0	0
CTD-2270N23.1	1	0	0	0	1	0	0	0	1
CTD-2331H12.7	1	0	0	0	0	0	1	0	0
CTD-2537I9.13	0	0	1	0	0	0	0	0	0
CTD-3234P18.6	0	0	0	1	0	0	0	0	0
CYTL1	0	0	0	0	0	1	1	0	1
DAB1	0	0	0	0	0	1	0	0	0
DDX60	0	0	0	0	0	0	1	0	0
DDX60L	0	0	0	0	0	1	0	0	0
DENND1B	1	0	0	0	0	0	0	0	0
DES	1	0	0	0	0	0	0	0	0
DKK3	0	0	0	0	1	0	0	1	0
DNAJB13	0	1	0	0	0	0	0	0	0
DOC2GP	0	0	0	0	0	0	1	0	0
DSC1	0	0	0	1	0	0	0	0	0
DTNA	1	0	0	0	0	0	0	0	0
E2F2	0	0	1	0	0	0	0	0	0
E2F7	0	0	0	0	0	0	0	0	1
EAF1-AS1	0	1	0	0	0	0	0	0	0
EAF2	0	0	1	0	1	1	0	0	0
EBF1	0	0	0	0	0	1	0	0	0
EFCAB2	1	0	1	0	0	1	0	0	1
EFHD1	1	0	1	0	0	0	0	0	0
EFNA5	1	0	0	0	0	0	0	0	0
ENTPD2	1	0	0	0	0	0	0	0	0
EPSTI1	1	0	0	0	0	0	0	0	0
ERI1	0	0	1	0	0	0	0	0	0
FAM153B	0	0	0	1	0	0	0	0	0
FAM19A1	1	0	0	0	0	0	0	0	0
FAM201A	0	1	0	0	0	0	0	0	0
FAM8A1	1	1	1	0	0	1	1	0	0
FAM95C	0	0	0	0	0	0	0	0	1
FANK1	0	0	0	1	0	0	0	0	0
FBLN7	0	0	1	0	0	0	0	0	0
FCER1A	0	0	1	0	0	0	0	0	0
FNDC3B	0	0	0	0	0	0	1	0	0
FRY-AS1	0	0	0	1	0	0	0	0	0
FXYD7	1	0	1	1	1	0	0	0	1
GBP1	0	0	0	0	0	0	0	0	1
GBP1P1	0	0	1	0	0	0	0	0	0
GBP3	0	0	0	0	0	1	0	0	0
GBP6	0	0	0	0	0	0	0	0	1
GPA33	0	0	1	0	0	0	0	0	0
GPR162	1	0	0	0	0	0	0	0	0
GPR20	0	0	0	0	0	0	0	1	0
GS1-257G1.1	0	0	0	0	1	0	0	0	0
HAR1A	1	0	0	0	0	0	0	0	0
HBEGF	0	0	0	0	0	0	0	0	1
HIST1H1PS1	0	1	1	0	0	1	0	1	0
HIST1H2BH	0	0	1	0	0	0	0	0	0
HIST1H2BO	0	0	0	0	0	0	0	1	0
HIST1H4H	1	0	0	0	0	0	0	0	0
HIST2H2BE	0	0	0	0	0	0	1	0	0
HLF	0	1	0	1	0	1	0	0	0
HOXA9	1	1	0	0	0	0	0	1	0
HPCAL4	0	0	0	1	0	0	0	0	0
HPN	1	1	1	0	0	1	0	1	0
HS3ST1	1	0	0	0	0	1	0	0	0
HSD11B1L	1	0	0	0	0	0	0	0	0
HSP90AB4P	0	0	0	0	0	0	1	0	0
IFI27	0	0	0	0	0	0	0	1	0
IGF2BP3	0	0	1	0	0	0	0	0	0
IGHA1	0	0	0	0	0	1	1	0	0
IGHV3-48	0	0	1	0	0	0	0	0	0
IGHV3-74	0	0	0	1	1	0	0	0	0
IGKV2-24	0	0	0	0	1	0	0	0	0
IGLC2	0	0	0	0	1	0	0	0	0
IGLV1-50	1	0	0	0	0	0	0	0	0
IGLV1-51	0	0	1	0	1	0	0	0	0
IGLV3-27	0	0	0	0	0	1	0	0	0
IL10	0	0	0	0	0	1	0	0	0
IL4	1	0	0	0	0	0	0	0	0
IL9R	0	0	1	0	0	0	0	0	0
ILDR2	0	0	0	0	0	0	1	0	0
ITGA1	0	0	0	0	0	0	0	1	0
JAK2	0	0	0	0	0	1	0	0	0
JAKMIP3	0	1	0	0	0	0	0	0	0
JCHAIN	0	0	0	0	0	0	1	0	0
KCNK17	0	0	0	0	1	0	0	0	0
KCNMA1	1	1	0	0	0	0	0	0	0
KCNT1	1	0	0	1	0	0	0	1	0
KIF20B	0	1	0	0	1	0	0	0	1
KIF24	1	0	0	0	0	0	0	0	0
KIR2DL1	0	0	0	0	1	0	0	0	0
KLHL33	1	0	0	1	0	0	0	0	0
KLRB1	0	0	0	1	0	0	0	0	0
KREMEN1	0	0	0	0	0	1	1	1	0
KRT18P5	0	0	0	1	0	0	0	0	0
KRT5	0	0	0	0	1	0	0	0	0
KRT72	0	0	0	0	0	0	0	0	1
KRT73	0	0	0	0	1	0	0	0	0
KRT86	0	0	0	0	0	0	0	0	1
L1CAM	0	0	1	0	0	0	0	0	0
LA16c-306A4.1	0	0	0	0	0	0	0	1	0
LA16c-321D4.2	1	0	0	0	0	0	0	0	0
LA16c-380A1.2	1	0	0	0	1	1	1	0	0
LAMA2	1	0	0	0	0	0	0	0	0
LANCL3	1	0	0	0	0	0	0	0	0
LARP1P1	0	0	0	0	0	0	1	0	0
LCA5L	0	0	0	0	1	0	0	0	0
LDB2	0	0	0	0	0	0	1	0	0
LDHD	1	0	0	0	0	0	0	0	0
LEPR	0	0	1	0	0	0	0	0	0
LGALS9B	0	0	0	0	0	0	0	1	0
LGI4	0	0	0	0	0	0	0	0	1
LGR6	0	0	0	0	1	0	0	0	0
LHFPL2	0	1	0	0	0	1	1	0	0
LINC01125	0	1	1	0	0	0	0	0	0
LINC01163	0	0	1	1	0	0	0	0	1
LINC01300	0	0	0	0	0	1	0	0	0
LINC01358	0	1	1	0	1	1	1	0	0
LINC01398	1	0	0	0	0	0	0	0	0
LINC01579	1	1	0	0	0	0	0	0	0
LINGO2	1	0	0	0	0	1	0	0	0
LIPM	1	1	1	0	0	1	1	1	1
LKAAEAR1	0	0	0	0	0	1	0	0	0
LL22NC03-24A12.9	0	0	0	1	0	0	0	0	0
LPAL2	0	0	0	0	1	0	0	0	0
LRRC4B	0	0	0	0	0	0	0	1	0
LRRCC1	0	0	0	0	0	0	0	0	1
LRRN3	1	0	0	0	1	0	0	0	0
LY6G6C	1	0	1	0	0	1	0	1	0
MED12L	0	0	0	0	0	1	0	0	0
MGP	0	0	0	0	0	0	0	0	1
MIR1249	0	0	0	0	0	0	0	0	1
MIR342	1	0	0	0	0	0	0	0	0
MIR4458HG	1	0	0	0	1	0	0	0	0
MIR4645	1	0	1	0	1	0	0	0	0
MMP8	0	1	0	0	0	0	0	0	0
MT2P1	0	0	0	1	0	0	0	0	0
MTCO3P5	1	0	0	0	0	0	0	0	0
MTF1	0	1	0	0	0	0	0	0	0
MTHFD2	1	1	1	0	1	1	1	1	1
MUC20	0	0	0	0	0	0	0	1	0
MYO10	0	0	0	0	0	0	0	1	0
MZB1	0	0	0	0	1	0	0	0	0
NOD2	0	1	0	0	0	0	0	0	0
NOG	1	0	0	0	1	0	0	0	0
NT5DC2	0	0	0	0	0	0	0	0	1
NYAP1	0	0	0	0	0	0	0	0	1
OR2B6	0	1	1	0	0	1	1	1	0
P3H2	0	0	0	0	0	0	1	0	0
PAICSP1	1	1	0	1	1	0	0	0	0
PCDH1	0	0	0	1	1	0	0	0	0
PDCD10	0	0	1	0	0	0	0	0	0
PDZK1	0	0	0	0	1	0	0	0	0
PIWIL2	1	0	0	0	1	0	0	0	0
PKMP3	0	1	1	0	0	0	0	0	0
PLCB2-AS1	1	0	0	0	0	0	0	0	0
PLSCR1	1	0	1	0	0	1	1	1	1
PNMA3	0	0	0	1	0	0	0	0	0
PNMA6A	1	0	0	1	0	1	0	0	0
PPP1R2P1	0	1	0	0	0	0	0	0	0
PPP1R3G	1	0	0	0	0	0	0	0	0
PSTPIP2	1	1	0	0	0	1	1	0	1
RAB7B	0	0	0	0	1	0	0	0	0
RBFOX2	0	0	0	1	0	0	0	0	0
RHAG	1	0	0	1	0	0	0	0	0
RN7SKP26	1	1	1	0	0	0	1	0	1
RN7SKP80	0	1	0	0	0	0	0	0	0
RNA5SP498	0	1	0	0	0	0	0	0	0
RNF165	1	0	0	0	0	0	0	0	0
ROBO3	1	0	0	0	0	0	0	0	0
RP1-178F15.5	0	0	0	1	0	0	0	0	0
RP1-221C16.8	1	0	0	0	0	0	0	0	0
RP1-310O13.7	0	0	0	0	0	0	0	1	0
RP1-34B20.21	0	0	0	0	0	0	1	0	0
RP1-34B20.4	0	0	0	0	0	1	0	0	0
RP1-59D14.5	0	0	0	0	0	0	1	0	0
RP11-102L12.2	0	0	1	0	0	0	0	0	0
[truncated: 1,014 more rows]

## Sheet: Stem
id	m0	m1	m2	m3	m4	m5	m6	m7	m8
LTBP3	1	0	0	0	0	0	0	0	0
SP5	0	0	0	0	0	0	0	1	0
MIXL1	0	0	0	0	0	0	0	1	0
A2M	0	0	0	0	0	0	1	0	0
NFKB1	0	0	1	0	0	0	0	0	0
CYP1A1	0	0	1	1	0	0	0	0	0
ZBTB47	0	0	0	0	0	1	0	0	0
AKAP6	0	0	1	0	0	0	0	0	0
HNRNPM	0	0	0	0	0	0	1	0	0
TNFAIP1	0	0	0	0	1	0	0	0	0
LINC01124	0	0	0	0	0	0	0	1	0
PDGFC	0	0	0	0	0	0	1	0	0
TBXT	0	0	0	0	0	0	0	1	0
GUCY1A2	0	0	1	0	0	0	1	0	0
SGPP2	1	0	1	0	0	1	0	0	0
CAMK2B	0	0	1	0	0	0	0	0	0
EMCN	0	0	1	0	0	0	0	0	0
ARHGEF17	0	0	0	0	0	0	1	0	0
FSHR	0	0	0	0	0	0	1	0	0
WNT8A	0	0	0	0	0	0	0	0	1
NTAQ1	0	0	0	0	1	0	0	0	0
MLIP	1	0	0	0	0	0	0	0	0
DDX49	0	0	1	0	0	0	0	1	0
PMEPA1	0	0	0	0	0	0	0	1	0
PSMC4	0	0	0	0	0	0	0	1	0
MLX	0	0	0	0	0	0	0	1	0
PCSK1	0	0	0	0	0	0	0	1	0
SPHKAP	0	0	0	0	0	1	0	0	0
SLC1A4	0	0	0	0	0	1	0	0	0
ZNF436	0	0	1	0	0	0	0	0	0
TBX6	0	0	0	0	0	0	0	0	1
PSMC3	0	0	0	0	0	0	0	1	0
FGF17	0	0	0	0	0	0	0	1	0
PDGFD	1	0	1	0	0	1	0	0	0
IFITM1	0	0	0	0	0	0	0	1	0
IQSEC1	0	0	0	0	0	0	1	0	0
APLNR	0	0	0	0	0	0	0	1	1
DLL3	0	0	0	0	0	0	0	0	1
ACAT2	0	0	0	0	0	0	0	1	0
METAP2	0	0	0	0	0	0	0	0	1
NKX2-3	0	1	0	0	0	0	0	0	0
DRG1	0	0	0	0	0	0	0	1	0
PREP	0	0	0	0	0	0	0	1	0
SRD5A3	0	0	0	0	0	0	0	1	0
ZFAT	0	0	0	0	0	1	0	0	0
VWF	0	0	0	0	0	1	0	1	0
MXRA8	0	1	0	0	0	0	0	0	0
KEL	0	1	0	0	0	0	0	0	0
PKM	0	0	0	0	0	0	0	1	0
CER1	0	0	0	0	0	0	0	1	0
FXYD6	0	1	1	0	1	1	1	0	0
TMEM88	1	1	0	1	1	0	0	0	0
AXIN2	0	0	0	0	0	0	0	1	0
LEO1	0	0	0	0	0	0	0	1	0
PTTG1	0	0	0	0	0	0	0	1	0
OSBPL2	1	0	0	0	0	0	0	0	0
PTPN13	1	1	0	1	1	1	1	1	1
TM4SF1	0	0	0	0	1	0	0	0	0
PPP1CA	0	0	0	0	0	0	0	1	0
ADCY6	0	0	0	0	1	0	0	0	0
EDNRA	0	1	0	0	0	0	0	0	0
TET1	0	0	0	0	0	0	0	1	0
CDA	0	0	0	0	0	0	0	1	0
EVX1	0	0	0	0	0	0	0	1	0
NUP37	0	0	0	0	0	0	0	1	0
PLVAP	0	0	1	0	0	0	0	0	0
TMEM106C	0	0	0	0	0	0	1	0	0
SPRY4	0	0	0	0	0	0	0	1	0
MASP1	0	0	0	0	0	1	0	0	0
SYDE2	0	1	0	0	0	0	0	0	0
CENPE	0	0	0	1	0	0	0	1	0
FOXH1	0	0	0	0	0	0	0	1	0
NXPH2	0	0	0	0	1	0	0	0	0
MACF1	0	0	0	0	0	0	1	0	0
DNAH1	0	0	1	0	0	0	0	0	0
MYO18A	0	0	1	0	0	0	0	0	0
EDAR	0	0	0	0	0	0	0	1	0
DNMT3B	0	0	0	0	0	0	0	1	0
WDR45B	0	0	0	0	0	0	0	1	0
PSMB1	0	0	0	0	0	0	0	1	0
INTS13	0	0	0	0	0	0	0	1	0
SPC25	0	0	0	0	0	0	1	0	0
FGFR3	0	0	0	1	0	0	0	0	0
STING1	1	0	0	0	0	0	0	0	0
VAMP8	0	0	0	0	0	0	0	1	0
LDLRAD4	1	0	0	0	0	0	0	0	0
CSF3R	0	0	0	0	0	1	0	0	0
MEF2C	0	0	0	1	0	0	0	0	0
KCNK5	0	0	0	1	0	0	0	0	0
TMEM63C	0	0	0	0	1	0	0	0	0
PSMD1	0	0	0	0	0	0	0	1	0
CDCA3	0	0	0	0	0	0	1	0	0
SORCS3	1	0	0	0	0	0	0	0	0
RCAN1	1	0	0	0	0	0	1	0	0
SMC6	0	0	0	0	0	0	0	1	0
EFNB3	0	0	0	1	0	0	0	0	0
VENTX	0	0	0	0	0	0	0	1	0
INHBA	0	0	0	0	1	0	0	0	0
MRPS11	0	0	1	0	0	0	0	0	0
NFATC2	0	0	0	0	0	1	0	0	0
NIPAL3	0	0	0	0	0	0	1	0	0
GTDC1	0	0	0	0	0	0	0	1	0
PSKH2	0	0	0	0	0	0	0	0	1
CNMD	0	0	0	1	0	0	0	1	0
EDN1	1	0	1	0	0	0	1	0	0
DOK3	0	0	0	0	0	0	0	1	0
DPM1	0	0	0	0	0	0	0	1	0
NOA1	0	0	0	0	0	0	0	1	0
PDCD2	0	0	0	0	0	0	0	1	0
FUT3	1	0	0	1	0	0	0	0	0
VTN	1	0	0	0	0	0	0	0	0
PPP2R1B	0	0	0	0	0	0	0	1	0
CMSS1	0	0	0	0	0	0	0	1	0
PSMC2	0	0	0	0	0	0	0	1	0
MESP2	0	0	0	0	0	0	0	1	0
HBEGF	0	0	1	0	0	0	0	0	0
WNT3	0	0	0	0	0	0	0	0	1
SNAI1	0	0	0	0	0	0	0	1	1
PSMC5	1	0	0	0	0	0	0	0	0
EBF4	0	1	0	1	1	0	0	0	0
ASB2	1	0	0	0	0	0	0	0	0
SUSD6	1	0	1	0	0	0	0	0	0
C6orf47	0	0	1	0	0	0	0	0	0
STARD13	0	0	1	0	0	0	0	0	0
NKX1-2	0	0	0	0	0	0	0	1	0
DHX16	1	0	0	0	0	0	1	1	0
PSMB6	0	0	0	0	0	0	0	1	0
ELOVL6	0	0	0	0	0	0	0	1	0
BOLA3	0	0	0	0	0	0	0	1	0
BLMH	0	0	0	0	0	0	0	0	1
GASK1B	0	0	0	0	1	0	0	0	0
GDAP1	0	0	0	0	0	0	0	1	0
TPM1	1	0	1	1	0	0	0	0	1
NOB1	0	0	0	0	0	0	0	1	0
MKX	0	0	0	0	0	0	0	1	0
XRCC6	0	0	0	0	0	0	0	1	0
SLC6A7	0	0	0	0	0	0	0	1	0
ADAMTSL2	0	0	1	0	0	0	0	0	0
ORC6	0	0	0	0	0	0	0	1	0
CENPH	0	0	0	0	0	0	0	1	0
LAMB2	1	1	0	1	0	1	0	0	0
HNRNPL	0	0	0	0	0	0	0	1	0
CRTAP	0	0	0	0	1	0	0	1	0
SETD5	0	0	0	0	1	0	0	0	0
ECD	0	0	0	0	0	0	0	1	0
OLFML1	0	0	0	0	0	1	0	0	0
MSRB1	0	0	0	0	0	0	0	1	0
CHSY3	1	0	1	0	0	0	1	0	0
DLGAP5	0	0	0	0	0	0	0	1	0
JARID2	0	0	0	1	0	0	0	0	0
COL2A1	1	0	0	0	0	0	0	0	0
IFITM10	1	1	0	0	1	0	0	0	0
STOX2	0	0	0	0	0	0	0	1	0
PRMT3	0	0	0	0	0	0	0	1	0
LRRC32	0	0	0	0	0	0	1	0	0
ZWINT	0	0	0	0	0	0	0	1	0
SLC46A3	0	0	1	0	0	0	0	0	0
GRB2	0	0	0	0	0	0	0	0	1
DHX29	0	0	0	0	0	0	0	1	0
ACOX2	0	0	0	1	0	0	0	0	0
KIF20B	0	0	0	0	0	0	0	1	0
IGFBP3	0	0	1	0	0	0	0	0	0
FAM83D	0	0	0	0	0	0	0	1	0
SLC8A1	0	0	1	0	0	0	0	0	0
AURKA	0	0	0	0	0	0	0	1	0
LANCL2	1	0	0	0	0	0	1	0	1
DUSP8	0	0	0	0	0	1	0	0	0
TTC29	0	0	0	0	0	0	0	1	0
ANO10	0	0	0	1	0	0	0	0	0
VRK1	0	0	0	0	0	0	0	1	0
MAPKBP1	1	0	0	1	0	1	0	0	1
ZFYVE28	0	0	0	1	0	0	0	1	0
SH2D4B	0	0	0	1	0	0	0	0	0
RGS3	0	0	1	0	0	0	0	0	0
RNH1	1	0	0	0	0	0	0	0	0
ENOPH1	0	0	0	0	0	0	0	1	0
ALDH3A2	0	0	0	0	0	0	0	1	0
CCZ1B	0	0	0	0	0	0	0	1	0
CYP2S1	0	0	0	1	0	0	0	0	0
NARS1	0	0	0	0	0	0	0	1	0
KIF20A	0	1	0	0	0	0	0	0	0
GDF11	0	0	0	0	0	1	0	0	0
ABTB1	1	0	0	0	1	0	1	0	0
PTGS2	1	0	0	0	0	0	0	0	0
COPRS	0	0	0	0	0	0	0	1	0
CD248	0	0	0	0	0	0	1	0	0
PRDM16	0	0	1	0	0	0	0	0	0
SERTAD2	0	1	0	0	0	0	0	0	0
CBR1	0	0	0	0	0	0	0	1	0
HMMR	0	0	0	0	0	0	0	1	0
NCAM1	0	0	0	0	0	1	0	0	0
NQO2	0	0	0	0	0	0	0	1	0
RELL2	0	0	0	1	0	0	0	0	0
ZDHHC16	0	0	0	0	0	0	0	1	0
ARHGAP11A	0	0	0	0	0	0	0	1	0
DARS1	0	0	0	0	0	0	0	1	0
QARS1	0	0	0	0	0	0	0	1	0
HNRNPK	0	0	0	0	0	0	1	0	0
PLK1	0	0	0	0	0	0	0	1	0
WLS	0	1	0	0	0	0	0	0	0
CDKN3	0	0	0	0	0	0	0	1	0
AHDC1	0	0	0	0	1	0	0	0	0
C1QTNF1	0	0	0	0	0	1	0	0	0
LSM3	0	0	0	0	0	0	0	1	0
TNFSF11	0	0	0	1	0	0	0	0	0
RAB40B	1	0	1	0	0	0	0	0	0
STEAP2	0	0	0	1	0	0	0	1	0
VCP	0	0	0	0	0	0	0	1	0
CDH5	0	0	0	0	0	1	0	0	0
VPS11	0	0	0	0	0	1	0	0	0
KCNK17	0	0	0	0	0	0	0	1	1
LRP10	1	0	0	0	0	0	0	0	0
CTDSP1	0	0	1	0	0	0	0	0	0
ZNF853	0	0	1	0	0	0	0	0	1
SNRPC	0	0	0	0	0	0	0	1	0
TRIML2	0	0	0	1	0	0	0	0	0
CTNNA1	1	0	0	0	0	0	0	0	0
PPIA	0	0	0	0	0	0	0	1	0
NIPA2	0	0	0	0	0	0	0	1	0
MACROH2A2	0	0	0	0	0	0	1	0	0
IGF2BP3	0	0	0	0	0	0	0	1	0
RPS6KA2	1	0	1	0	1	0	1	0	1
CUZD1	0	0	0	0	0	0	0	1	0
PCDH1	0	0	0	1	0	0	0	0	0
ZFAND1	0	0	0	0	0	0	0	1	0
SGSM2	0	0	1	0	0	0	0	0	0
OAT	0	0	0	0	0	0	0	1	0
CSNK2A2	0	0	0	0	0	0	0	1	0
SAMD8	0	0	0	1	0	0	0	1	0
ADGRA2	0	1	0	0	0	0	0	0	0
SHISAL2B	0	0	0	0	0	0	0	0	1
HSD11B2	0	0	0	0	0	0	0	1	0
CGREF1	0	0	0	1	0	0	0	0	0
BMF	1	0	0	0	0	0	0	0	0
HHAT	1	1	1	1	1	1	1	0	1
YWHAH	0	0	0	0	0	0	0	1	0
PPP2R5B	1	0	0	0	0	0	0	0	0
SYNPO2	0	0	1	0	0	0	0	0	0
GPN3	0	0	0	0	0	0	0	1	0
GRM4	0	0	0	0	0	0	0	1	0
HJURP	0	0	0	0	0	0	1	0	0
TTC39B	0	0	0	0	0	0	0	0	1
ARAP3	0	0	0	1	1	0	1	1	0
ADRA2C	0	0	0	0	0	0	0	1	0
SPINK1	0	0	1	0	0	0	0	0	0
CREB5	0	0	0	0	1	0	0	0	0
C22orf23	0	0	1	0	0	0	0	0	0
TRIP13	0	0	0	0	0	0	0	1	0
KALRN	0	1	1	0	0	0	0	0	0
IQCB1	0	0	0	0	0	0	0	1	0
ATIC	0	0	0	0	0	0	0	1	0
FSTL3	0	0	1	0	0	0	0	0	0
PDK4	0	0	0	0	0	0	0	0	1
SMYD2	1	0	0	0	0	0	0	0	0
NSF	0	0	0	0	0	1	0	0	0
NUP93	0	0	0	0	0	0	0	1	0
PZP	1	0	0	0	0	0	0	0	0
PIF1	0	0	0	1	0	0	0	1	0
CBX8	0	0	0	0	0	1	0	0	0
DDX18	0	0	0	0	0	0	0	1	0
RRP9	0	0	0	0	0	0	0	1	0
DDX21	0	0	0	0	0	0	0	1	0
NKX2-6	0	0	0	0	0	0	1	0	0
KIF1A	0	0	0	0	0	0	0	1	0
RHOJ	0	0	0	0	0	1	0	0	0
APCDD1L	0	0	0	1	0	0	0	0	0
TGFB3	1	0	0	0	0	0	0	0	0
SLIT3	0	0	0	1	0	0	0	0	0
BUB1	0	0	0	0	0	0	0	1	0
YARS1	0	0	0	0	0	0	0	1	0
NOPCHAP1	0	0	0	0	0	0	0	1	0
ALDH5A1	1	0	0	0	0	0	0	0	0
BRSK2	0	0	0	0	0	0	0	1	0
TXLNB	0	0	0	0	0	0	0	0	1
ACSF2	0	0	0	1	0	0	0	0	0
SLC29A1	0	0	0	1	0	0	0	0	0
ZSCAN10	0	0	0	0	0	0	0	1	0
NECTIN1	0	0	0	1	0	0	0	1	0
TERF1	0	0	0	1	0	0	0	1	0
EXD3	0	0	0	0	0	1	0	0	0
PSMB7	1	0	0	0	0	0	0	0	0
SACM1L	0	0	0	0	0	0	1	0	0
SCN7A	0	0	0	0	0	0	0	0	1
PSMA7	0	0	0	0	0	0	0	1	0
ATL1	0	0	0	0	0	0	1	0	0
MICAL3	0	0	1	0	0	1	0	0	0
SEMA6D	0	0	0	0	1	0	0	0	0
GLRB	0	0	0	0	0	1	0	0	0
MOAP1	1	0	0	0	0	1	0	0	1
MREG	0	0	0	0	0	0	0	1	0
PARN	0	0	0	0	0	0	0	1	0
KCNK12	0	0	0	0	0	0	0	1	0
TMEM30B	1	0	0	0	0	0	0	0	0
YPEL3	0	0	1	1	1	0	0	0	0
IGSF8	0	0	0	1	0	0	0	1	0
VRTN	0	0	0	0	0	0	0	1	0
DPYD	0	1	0	0	0	0	0	0	0
CDK2AP2	0	0	0	0	0	0	0	1	0
DHCR7	0	0	0	0	0	0	0	1	0
CRYAB	1	0	0	0	0	0	0	0	0
POLR2G	0	0	0	0	0	0	0	1	0
CACNA2D4	1	1	0	1	1	1	1	0	0
ZEB2	0	0	1	1	0	0	0	0	1
CRELD2	0	0	0	1	0	0	0	0	0
CDC123	0	0	0	0	0	0	0	1	0
GLIPR1	0	0	0	0	1	0	0	0	0
LEF1	0	0	0	1	1	0	0	1	1
COL5A1	0	0	0	0	0	0	1	0	0
SOCS1	0	0	0	0	0	0	0	1	0
DCC	0	0	0	0	1	0	0	0	0
LZTS1	0	0	0	0	0	0	0	0	1
TGFA	0	0	0	0	0	0	0	1	0
TCF7	0	0	0	0	0	0	0	1	0
LMCD1	0	0	0	1	0	0	0	0	0
DOK4	0	1	0	1	0	0	0	0	1
ATP2A3	0	0	0	1	0	0	0	0	0
THY1	0	0	0	1	0	0	0	0	0
YAF2	1	0	1	0	0	1	0	0	1
ASIC1	0	0	0	0	0	1	0	0	1
SFRP5	1	1	0	0	1	0	0	0	1
EPB41L4B	0	0	0	0	0	0	0	1	0
CABP1	0	0	0	0	0	0	0	1	0
CEP55	0	0	0	0	0	0	0	1	0
CTCFL	0	0	0	1	0	0	0	0	0
CSMD2	0	0	0	1	0	0	0	0	0
SPAG5	0	0	0	0	0	0	1	0	0
MACROD1	1	0	0	0	0	0	0	0	0
CDX1	0	0	0	0	0	0	0	1	0
ABHD15	1	0	1	0	0	1	0	0	0
PLA2G3	0	0	0	0	0	0	0	1	0
NXNL2	0	0	0	1	1	0	0	0	0
MYOM1	1	0	1	0	0	1	0	0	0
SLC7A8	0	0	0	1	0	0	0	1	0
ZDHHC22	0	0	0	1	0	0	0	0	0
ZFYVE26	0	0	0	0	0	1	0	0	0
FDFT1	0	0	0	0	0	0	0	1	0
TOM1L2	1	0	1	1	0	1	0	0	1
CBLB	1	0	0	0	0	0	0	0	0
HSPA4	0	0	0	0	0	0	0	1	0
SMG6	1	0	0	0	0	0	0	0	0
PRELID3A	0	0	0	1	1	0	0	1	0
CCNC	0	0	0	0	0	0	0	1	0
ZNF432	0	1	0	0	0	0	0	0	0
METTL2A	0	0	0	0	0	0	0	1	0
PKDCC	0	1	0	0	1	0	1	0	0
SPPL3	0	1	0	0	0	0	0	0	0
GALNT8	0	0	0	1	0	0	0	1	0
GJA3	0	0	0	0	0	1	0	0	0
MIB2	0	0	0	0	1	0	0	0	0
EFEMP2	0	0	0	0	0	1	0	0	0
FGF19	0	0	0	0	0	0	0	1	0
LDB3	0	0	0	0	0	1	0	0	0
DNAJB6	1	0	0	0	0	0	0	0	0
ACSL1	0	0	0	0	0	1	0	0	0
ADARB1	0	0	0	1	0	0	0	0	0
KATNBL1	0	0	0	0	1	0	0	0	0
SLC8B1	0	0	0	0	1	0	0	0	0
FRAT1	0	0	1	0	0	0	0	0	0
FGF1	0	0	0	0	0	1	0	0	0
PSMD3	0	0	0	0	0	0	0	1	0
LLCFC1	0	1	0	0	1	1	0	0	1
MVD	1	0	0	0	0	0	0	1	0
LPCAT1	0	0	0	0	0	0	0	1	0
SDAD1	0	0	0	0	0	0	0	1	0
IFT20	0	0	0	1	0	0	0	0	0
RPL12	0	0	0	0	0	0	0	1	0
CCNA2	0	0	0	0	0	0	1	0	0
ZBTB10	0	0	0	0	0	0	0	0	1
RDH14	0	0	1	0	0	0	0	1	0
AP5S1	0	0	1	0	0	0	0	0	0
DACT3	0	0	0	0	0	1	0	0	1
DBF4	0	0	0	0	0	0	0	1	0
ATP1A3	0	0	0	0	0	0	0	1	0
DGKZ	0	0	0	1	0	0	0	0	0
POLR1E	0	0	0	0	0	0	0	1	0
ADPRHL1	0	0	1	0	0	1	0	0	0
AMHR2	0	0	0	1	0	0	0	0	0
VPS33A	0	1	0	0	0	1	0	1	1
MYRF	1	0	0	0	0	0	0	0	0
RUSC2	0	1	0	0	0	0	0	0	0
GBP2	0	0	0	0	1	0	0	0	0
MAST4	0	0	1	0	0	0	0	0	0
ABRA	0	0	1	0	0	0	0	0	0
ATP10A	0	0	0	0	0	0	0	1	0
ZNF503	0	0	1	0	0	0	0	0	0
RRAS	0	0	1	1	1	0	0	0	0
KLF1	0	1	0	1	1	1	0	0	1
GMNN	0	0	0	0	0	0	0	1	0
PSMD7	0	0	0	0	0	0	0	1	0
PKP2	0	0	0	0	0	1	0	0	0
ABCG1	0	0	0	1	0	0	0	0	0
GGCT	0	0	0	0	0	0	0	1	0
TOMM22	0	0	0	0	0	0	0	1	0
CFAP221	0	0	0	0	0	0	0	0	1
LRSAM1	1	0	1	0	0	0	0	0	0
COL8A1	0	1	1	0	1	0	1	0	0
NKD1	0	0	0	0	0	0	0	1	0
RNASEH2B	0	0	0	0	0	0	0	1	0
NUDT15	0	0	0	0	0	0	0	1	0
SNF8	1	0	0	0	0	0	0	1	0
PPP2R5D	0	0	0	0	0	0	0	1	0
REEP1	0	0	0	0	0	1	0	0	0
GTF2E2	0	0	0	0	0	0	0	1	0
SRRM1	0	0	0	0	0	0	1	0	0
CACNA1D	0	0	0	1	0	0	0	0	1
RYR1	0	0	0	0	0	0	0	1	0
SHISA2	0	1	0	0	0	0	0	0	0
TMEM117	1	0	0	0	0	0	0	0	0
ZNF407	0	0	0	0	0	0	1	0	0
ARNTL	0	0	0	0	0	0	0	1	0
PTGES3	0	0	0	0	0	0	0	1	0
ILKAP	1	0	0	0	0	0	0	0	0
HASPIN	0	0	0	0	0	0	0	1	0
MTHFD1L	0	0	0	0	0	0	0	1	0
FSD2	1	0	1	1	0	1	0	0	1
DRAM2	0	0	0	1	1	0	0	1	0
USP45	0	0	0	1	0	0	0	1	0
MRPS16	0	0	0	0	0	0	0	1	0
ASIC4	0	1	1	0	0	0	0	0	1
CCNG1	0	0	0	1	0	0	0	0	0
PSMD6	0	0	0	1	0	0	0	1	0
GSDME	1	1	1	1	0	0	1	0	0
STRBP	0	0	0	0	0	0	0	1	0
TCAF1	0	0	0	0	0	1	1	0	0
TNFRSF11B	0	0	0	0	0	0	0	1	0
SYTL2	0	0	1	0	0	0	0	0	0
FBXO32	0	0	0	0	0	1	0	0	0
DRD2	0	1	0	0	0	0	0	0	0
CRHBP	1	0	0	0	0	0	0	0	0
TEX2	1	0	0	0	0	0	0	0	0
POSTN	0	0	1	0	0	0	0	0	0
NKX2-5	1	0	1	0	0	1	0	0	0
SYNGR1	0	0	0	1	1	0	0	0	0
SGO2	0	0	0	0	0	0	0	1	0
PSMD14	0	0	0	0	0	0	0	1	0
CDK5R1	0	0	0	0	0	0	0	1	0
YPEL2	1	0	1	0	0	1	0	0	0
CENPN	0	0	0	0	0	0	0	1	0
TIAL1	0	0	0	0	1	0	0	0	0
GLTP	0	0	0	0	0	0	0	1	0
LYAR	0	0	0	0	0	0	0	1	0
INPP4A	0	0	0	0	0	0	0	1	0
ACTA2	0	1	0	0	0	0	0	0	0
RIN2	1	0	0	0	0	0	0	0	0
CFC1	0	1	0	0	0	0	0	0	0
RARB	0	0	0	0	0	0	0	0	1
DTWD2	0	0	0	0	0	0	0	1	0
CRYBG1	1	0	0	0	0	0	0	1	0
RTKN	1	0	0	0	0	0	0	0	0
RNF125	0	0	0	0	0	0	0	1	0
CADM4	1	0	1	1	0	0	0	0	0
SNRPD3	0	0	0	0	0	0	0	1	0
POLR2K	0	0	0	0	0	0	0	1	0
RPP30	0	0	0	0	0	0	0	1	0
PDGFRA	0	1	0	0	0	0	0	0	0
SNRPF	0	0	0	0	0	0	0	1	0
CNTF	0	0	0	0	0	0	0	1	0
PSMA3	0	0	0	0	0	0	0	1	0
CDCA2	0	0	0	0	0	0	0	1	0
WDR25	0	0	1	0	0	0	0	0	0
RING1	1	1	0	1	1	1	1	0	1
SQLE	0	0	0	0	0	0	0	1	0
FAM168A	0	1	0	0	0	0	0	0	0
NR3C2	1	0	1	0	0	0	0	0	0
SAFB2	0	0	1	0	0	1	1	1	0
INTS2	0	0	0	0	0	0	1	1	0
TIPARP	1	1	1	1	0	1	0	0	1
MYBPC3	1	0	1	0	0	0	0	0	0
DKK4	0	0	0	0	0	0	0	1	0
TXNDC17	1	0	0	0	0	0	0	1	0
PHB2	0	0	0	0	0	0	0	1	0
WASHC2C	1	0	1	0	0	1	0	0	0
MYH6	1	0	1	1	0	1	0	0	0
SCN9A	1	0	0	0	0	0	0	1	0
AASS	0	0	0	0	0	0	0	1	0
GTSE1	0	0	0	0	0	0	0	1	0
ESCO2	0	0	0	0	0	0	0	1	0
TEAD3	0	0	0	1	0	0	0	0	0
DKK1	1	0	0	0	0	0	0	0	0
BUB1B	0	0	0	0	0	0	0	1	0
IST1	0	0	0	0	0	0	1	0	0
MAP1A	0	0	0	1	0	0	1	0	0
TMEM167A	1	0	0	0	0	0	0	0	0
FGF10	1	0	0	0	0	0	0	0	0
TEX19	0	0	0	0	0	0	0	1	0
DENND5A	0	0	0	0	0	1	0	0	0
ZNF446	0	0	0	0	0	1	0	0	0
ERAL1	0	0	0	0	0	0	0	1	0
TALDO1	0	0	0	0	0	0	0	1	0
CPAMD8	0	0	0	0	0	1	0	0	0
STK38L	0	0	1	0	0	0	0	0	0
TGFBR3	0	0	0	0	1	0	0	0	0
SAMD3	0	0	0	0	0	0	0	1	0
MVP	0	0	1	0	0	0	0	0	0
CALCOCO1	0	0	0	0	1	0	0	0	0
SLC27A4	0	0	0	0	0	0	0	1	0
IMPDH2	0	0	0	0	0	0	0	1	0
IMPA2	1	0	0	0	0	0	0	0	0
MFSD2A	0	0	0	1	0	0	0	1	0
CD72	0	0	0	0	0	0	0	1	0
RBM14	0	0	0	0	0	0	0	1	0
CTSV	0	0	0	1	0	0	0	0	0
SHQ1	0	0	0	0	0	0	0	0	1
TSPYL4	0	0	0	0	0	1	0	0	0
SLC6A6	0	0	0	1	0	0	0	0	0
RNF20	0	0	0	0	0	0	0	1	0
CLEC16A	0	1	1	1	0	0	1	0	0
TUBGCP3	0	0	0	0	0	1	0	0	0
MIR1-1HG	1	0	1	1	0	0	0	0	0
TRAPPC9	1	0	0	0	0	0	0	0	0
WFIKKN1	0	1	0	0	0	0	0	0	0
NUBP1	1	0	1	0	0	0	0	0	1
FILIP1	1	0	0	0	0	0	0	0	0
HES4	0	1	0	1	0	0	0	0	0
PRKN	1	0	1	0	1	0	0	0	1
PRSS23	0	0	0	0	0	0	1	0	0
PDCL3	0	0	0	0	0	0	0	1	0
PLXNA2	0	0	0	1	0	0	0	0	0
KNSTRN	0	0	0	0	0	0	0	1	0
CNOT10	0	0	0	0	0	0	0	0	1
GLB1L3	0	0	0	0	0	0	0	1	0
MAD2L1	0	0	0	0	0	0	0	1	0
CFC1B	0	0	0	0	0	0	0	1	0
LAMTOR1	1	0	0	0	0	0	0	1	0
WSB1	0	0	1	0	0	0	0	0	0
SEC11C	0	0	0	0	0	0	0	1	0
FAM98B	0	0	0	0	0	0	0	1	1
ITPRID2	0	0	0	0	0	1	0	0	0
ZSWIM8	0	0	0	0	1	0	0	0	0
NOC3L	0	0	0	0	0	0	0	1	0
MVK	0	0	1	0	0	0	0	0	0
PALM	0	0	0	1	0	0	0	0	0
THBD	1	1	0	1	1	0	1	0	1
PSMD2	0	0	0	0	0	0	0	1	0
HHIPL2	0	0	0	0	1	1	0	1	0
PGA5	0	1	0	1	0	1	1	1	0
TXN	0	0	0	0	0	0	0	1	0
LMOD1	1	0	0	0	0	0	0	0	0
MYH7B	1	0	0	0	0	0	0	0	0
ELMO3	0	0	0	1	0	0	0	0	0
ZSCAN22	0	0	0	0	1	0	0	0	0
EML2	0	0	0	1	0	0	0	0	0
TCERG1	0	0	0	0	1	0	1	1	0
PRR11	0	0	0	1	0	0	0	1	0
ARHGEF37	0	0	1	0	0	0	0	0	0
AHSA1	0	0	0	0	0	0	0	1	0
VDAC1	0	0	0	0	0	0	0	1	0
MTO1	0	0	0	0	0	0	0	1	0
MTFP1	0	0	0	0	0	0	0	1	0
PDE6G	0	0	0	0	0	0	0	1	0
IGDCC4	0	1	0	0	0	0	0	0	0
PKIG	0	0	0	1	0	0	0	0	0
ACOX3	0	0	1	0	0	0	0	0	0
EMC10	0	0	0	0	0	0	1	0	0
SLC29A2	0	0	0	0	0	0	0	1	0
EIF3A	0	0	0	0	0	0	0	1	0
TUBB2B	0	0	0	0	0	0	0	1	0
UBE2N	0	0	0	0	0	0	0	1	0
ANP32B	0	0	0	0	0	0	0	1	0
ZNF385C	0	0	0	0	0	0	0	1	0
GK5	0	1	0	1	1	0	1	0	0
CBFB	0	0	0	0	0	0	0	0	1
AP1B1	1	0	0	0	0	0	0	1	0
ZBTB8OS	0	0	0	0	0	0	0	1	0
BAZ2A	0	0	0	0	0	0	1	0	0
GOLGA6A	0	0	0	1	0	0	0	0	0
SMAD9	0	0	1	0	0	0	0	0	1
LARGE2	0	0	0	0	0	0	0	1	0
NABP2	0	0	0	0	0	0	0	1	0
RSPO3	0	0	0	0	0	0	0	0	1
ZER1	0	1	0	0	0	0	0	0	0
BICDL2	0	0	0	0	0	0	0	1	0
TGFBR2	0	0	1	0	0	0	0	0	0
PLA2G4C	0	0	1	0	0	0	0	0	0
FCF1	0	0	0	0	0	0	0	1	0
CHPF2	0	0	1	0	0	0	0	0	0
CNTNAP2	0	0	0	0	0	0	0	1	0
MAFA	0	0	0	0	0	0	0	1	0
RPAP1	0	0	0	0	0	0	0	1	0
UGT8	0	0	0	1	0	0	0	1	0
CCT4	0	0	0	0	0	0	0	1	0
DHX9	0	0	0	0	0	1	0	0	0
GSC	0	0	0	0	0	0	0	1	0
DNAL1	0	0	0	0	0	0	0	0	1
JRKL	0	0	0	0	0	0	1	0	0
CDKN2AIP	0	0	1	0	0	0	0	0	0
COL13A1	0	0	0	0	1	0	0	1	1
RPL17	0	0	0	0	0	0	0	1	0
ADAMTS12	0	1	0	0	0	1	0	0	0
ANKRD13B	0	0	0	0	1	0	0	0	0
VSIG10	0	0	0	0	0	0	0	1	0
ENPP1	0	0	0	0	0	0	0	1	0
MAP3K4	0	0	0	0	0	0	0	1	0
STAC2	0	0	0	1	0	0	0	0	0
TAPBP	0	0	0	1	0	0	0	0	0
ATP1B3	0	0	0	1	0	0	0	0	0
STAT5A	0	0	0	0	0	0	1	0	0
NAA30	0	0	0	0	0	0	0	1	0
TEX261	1	0	1	0	1	0	1	0	1
PWWP2A	0	0	0	0	0	0	0	1	0
TCP1	0	0	0	0	0	0	0	1	0
MELK	0	0	0	0	0	0	0	1	0
ITIH2	1	0	0	0	0	0	0	0	0
FYB2	0	1	0	0	0	0	0	0	0
PXMP2	0	0	0	0	0	0	0	0	1
CDC20	0	0	0	0	0	0	0	1	0
TGFB2	0	0	0	0	0	0	0	0	1
SLC16A1	0	1	0	1	0	0	0	1	0
OVGP1	1	0	0	0	0	0	0	0	0
CAV1	0	0	0	0	0	0	0	1	0
ZNF512B	0	1	0	0	1	1	0	0	0
CCN2	0	0	0	0	1	1	0	0	0
CDK1	0	0	0	0	0	0	0	1	0
UBE2C	0	0	0	0	0	0	0	1	0
HBP1	0	0	1	0	0	0	0	0	1
CAPN3	1	0	0	0	0	0	0	0	0
EIF2AK4	0	0	0	1	0	0	0	0	0
FARSB	0	0	0	0	0	0	0	1	0
SCNN1A	0	0	0	0	0	0	0	1	0
GAMT	0	0	0	0	0	1	0	0	0
PI4KA	1	1	1	0	0	1	0	0	1
ST6GALNAC6	1	0	0	0	0	0	0	0	0
POLR1B	0	0	0	0	0	0	0	1	0
MIS18A	0	0	0	0	0	0	0	1	0
NXF1	0	0	0	0	0	0	0	0	1
FAM210A	0	0	0	0	0	0	0	1	0
KANK2	0	0	1	0	1	0	1	0	1
CDC25C	0	1	0	0	0	0	0	0	0
TBC1D9	0	1	0	0	0	0	0	0	0
WIPF3	0	0	0	0	0	0	0	1	0
BTBD11	0	0	0	1	0	0	0	1	0
NDUFA10	0	0	1	0	0	0	0	0	0
ST8SIA5	0	0	0	1	0	0	0	1	0
PLBD2	0	0	0	1	0	0	0	0	0
TACR3	0	0	0	0	0	0	0	1	0
TPST2	0	0	0	0	0	0	0	1	0
DNAJB2	0	0	1	1	0	1	0	0	0
MFSD1	1	0	1	0	0	0	0	0	0
TIAM2	1	1	0	1	0	1	0	0	0
ZNF627	0	0	0	0	0	0	0	0	1
EIF3D	0	0	0	0	0	0	0	1	0
ADAM28	0	0	0	1	0	0	0	0	0
RIPOR1	0	0	1	0	0	0	0	0	0
AGT	1	0	0	0	0	0	0	0	0
RACGAP1	0	1	0	0	0	0	0	0	0
SYNE1	1	0	0	0	0	0	0	0	0
CCDC183	0	1	0	0	0	0	0	0	0
PAF1	0	0	0	0	0	1	0	0	0
ZNF823	1	0	0	0	0	0	0	0	0
NTS	0	0	0	0	0	0	0	1	1
SYT10	1	1	0	1	1	1	0	0	1
HAPLN2	0	0	0	0	0	1	0	0	0
TRPM5	0	0	0	0	0	0	0	0	1
PRKCQ	0	0	0	0	0	0	0	1	0
SIPA1L2	0	0	1	0	0	0	0	0	0
VDAC2	1	0	0	0	0	0	0	0	0
UBBP4	0	1	0	0	0	0	0	0	0
SLC17A9	0	0	0	1	0	0	0	0	0
JCAD	0	1	0	0	1	1	0	0	1
ABCA1	0	1	1	0	0	0	0	0	0
ATP6V0D1	1	0	0	0	0	0	0	0	1
C6orf62	0	0	0	0	0	0	0	1	0
MAPK8IP3	1	0	0	0	0	0	0	0	0
FGF18	0	0	1	0	0	0	0	0	0
NAB1	0	0	0	1	0	0	0	0	0
RRP8	0	0	0	0	0	1	0	0	1
PHLDB1	1	0	0	0	0	0	0	0	0
ARHGAP19	0	0	0	0	0	0	0	1	0
MYL12B	1	0	1	1	0	0	0	0	0
MRPL19	0	0	0	0	0	0	0	1	0
TAPT1	0	0	0	0	0	1	0	0	0
COQ2	0	0	0	0	0	0	0	1	0
INHA	1	0	0	0	0	0	0	0	0
USHBP1	0	0	0	0	0	0	0	1	0
KDM7A	1	1	0	0	0	0	0	1	1
SMPDL3B	0	0	0	1	0	0	0	1	0
NGFR	0	0	1	0	0	0	0	0	0
DDX10	0	0	0	0	0	0	0	1	0
XPO1	0	0	0	1	0	0	0	0	0
FXR1	0	0	0	1	0	0	0	0	0
ACBD5	0	0	0	0	0	0	0	1	0
TFPI2	0	0	0	1	0	0	0	0	0
LZIC	0	0	1	0	0	0	0	0	0
ABHD5	0	0	0	1	0	0	0	0	0
ZBTB4	0	0	0	0	0	1	0	0	0
AP2A2	0	0	0	0	0	0	0	0	1
ALYREF	0	0	0	0	0	0	0	1	0
ZBTB22	1	0	0	0	0	0	0	0	0
NEU3	0	0	0	0	0	0	0	1	0
THAP1	0	0	0	0	0	0	0	1	1
PGAM1	0	0	0	0	0	0	0	1	0
CNKSR3	0	0	0	0	0	0	0	1	1
ANPEP	1	0	0	0	1	0	0	1	1
CERCAM	0	0	0	0	0	0	0	0	1
MND1	0	0	0	0	0	0	0	1	0
CLTC	1	0	0	0	0	0	0	0	0
GIPC1	0	0	0	0	0	1	0	0	0
MRPS22	0	0	0	0	0	0	0	1	0
FAR1	0	0	0	0	1	0	0	0	0
C1GALT1	0	1	0	1	0	0	0	1	0
CHN2	0	0	1	0	0	1	0	0	0
MB	0	0	0	0	0	0	0	0	1
MYH7	0	0	1	0	0	1	0	0	0
HMGCS1	0	0	0	0	0	0	0	1	0
UFD1	0	0	0	0	0	0	0	1	0
RAMP2	1	1	0	1	0	0	0	0	1
IDH1	0	0	0	0	0	0	0	1	0
PAK1IP1	0	0	0	0	0	0	0	1	0
NCOA6	0	0	0	0	0	0	1	0	0
ZNF215	0	0	0	0	0	0	0	1	0
PPP1R7	0	0	1	0	0	0	0	0	0
FAM161B	0	0	1	0	0	0	0	0	0
ETNPPL	0	0	0	0	0	0	1	0	0
ACSBG1	0	0	0	1	0	0	0	0	0
MEA1	0	0	0	0	0	0	0	1	0
IDI1	0	0	1	0	0	0	0	0	0
ANK1	0	0	0	1	0	0	0	0	0
SUGP2	0	0	1	1	1	0	0	0	0
NUFIP1	0	0	0	0	0	0	0	1	0
CFL1	0	0	0	0	0	0	0	1	0
OIT3	0	1	0	0	0	0	0	0	0
MYH2	0	0	1	0	0	0	0	0	0
UBE2D2	0	0	0	0	0	0	0	1	0
AGPAT4	0	0	0	1	0	0	0	0	0
TECTA	0	0	0	0	0	1	0	0	0
TCIM	0	0	0	0	0	0	1	0	0
UGT3A2	0	0	0	1	0	0	0	0	0
TJP1	0	0	0	0	0	0	0	0	1
NANS	0	0	0	0	0	0	0	1	0
DIRAS3	0	0	1	0	0	0	0	0	0
LAMA4	1	0	0	0	0	0	0	0	0
VPS18	1	0	0	0	0	0	0	0	0
TTC1	0	0	0	0	0	0	0	1	0
COMMD9	1	0	1	0	0	0	0	0	0
TUBB2A	0	0	0	0	0	0	0	1	0
RUNX3	0	0	0	0	0	0	0	1	0
CAPN1	1	0	0	0	0	0	0	0	0
BHLHE40	0	0	0	0	0	0	0	1	0
PARL	0	0	0	0	0	0	0	1	0
SIGIRR	0	0	0	0	0	0	0	1	0
TIMM23B	0	0	0	0	0	0	0	1	0
CCNB1	0	0	0	0	0	0	0	1	0
LSS	0	0	1	0	0	0	0	0	0
TMEM43	0	0	0	0	0	0	0	1	0
DNTTIP1	1	0	0	0	0	0	1	1	0
PFN1	0	0	0	0	0	0	0	1	0
PCGF6	0	0	0	0	0	0	0	0	1
KLF2	0	0	0	1	0	0	0	0	1
EPB41L1	1	0	1	0	0	0	1	0	0
NTF3	0	0	0	0	0	1	0	0	0
MGST1	0	0	0	0	0	0	0	1	0
DYRK1B	0	1	0	0	0	0	0	0	0
MXD4	0	0	0	0	1	0	0	0	0
MRPS9	0	0	0	0	0	0	0	1	0
SLC35A4	1	0	0	0	0	0	1	1	0
ADRM1	0	0	0	0	0	0	0	1	0
RFX1	0	0	0	0	0	0	1	0	0
TNFRSF8	0	0	0	1	0	0	0	0	0
EIF3I	0	0	0	0	0	0	0	1	0
IFI16	1	0	0	1	1	0	0	0	1
BCAN	0	0	0	1	0	0	0	0	0
FYCO1	1	0	0	0	0	0	0	0	0
TLCD4	0	0	0	0	0	1	0	0	0
PLCL1	1	0	1	0	0	1	0	0	1
ARID5A	0	0	0	0	0	0	0	1	0
GPX3	1	0	0	0	0	0	0	1	0
SREBF1	0	0	0	1	0	0	0	1	0
CDH11	0	1	0	0	0	0	0	0	0
AJUBA	0	0	0	0	0	1	0	0	0
RAP2A	0	0	0	0	0	0	0	1	0
HMGCR	0	0	0	1	0	0	0	0	0
PDK2	0	0	0	0	0	0	0	0	1
HMGB2	0	0	0	0	0	0	0	1	0
SHMT1	0	0	0	0	0	0	0	1	0
SETD7	0	1	0	0	0	0	0	0	0
SHC2	0	0	0	0	0	0	0	0	1
KEAP1	1	0	1	0	0	1	1	0	1
PPP1R13B	1	0	0	0	0	0	0	0	0
NEXN	1	0	0	0	0	0	0	0	0
JAKMIP1	0	0	0	0	0	0	0	1	0
RPA3	0	0	0	0	0	0	0	1	0
PCLO	0	0	0	0	0	0	0	1	0
BCLAF1	0	0	0	0	0	0	1	1	1
CLIP4	0	0	0	0	0	0	1	0	0
RTCB	0	0	0	0	0	0	0	0	1
GHR	0	0	0	0	1	0	0	0	0
SUPT5H	1	0	0	0	0	0	0	0	0
SORBS2	1	0	0	0	0	0	0	0	0
MRPS10	0	0	0	0	0	0	0	1	0
NDUFC1	0	0	0	0	0	0	0	1	0
RP9	1	0	0	0	0	0	0	0	0
GFPT2	0	0	0	1	0	0	0	1	0
NHLH2	0	0	0	0	0	0	0	1	0
MAFK	1	0	0	0	0	1	0	0	0
TNS1	0	0	0	0	0	0	0	0	1
RNF11	1	0	0	0	0	0	0	0	0
CIC	0	0	0	0	0	1	0	0	1
IL17D	0	0	1	0	0	1	0	0	0
PCNT	0	0	0	0	0	0	0	1	0
IDUA	1	1	1	0	0	1	1	0	0
SIDT2	1	1	1	1	1	1	1	0	0
MRPL27	0	0	0	0	0	0	0	1	0
PRDM2	1	1	1	0	1	1	1	0	1
DENND3	0	0	0	0	1	0	0	0	0
SLC4A11	0	0	0	1	0	0	0	0	0
TNPO3	0	0	0	0	0	0	0	1	0
FGFBP3	0	0	0	1	0	0	0	1	0
NTRK2	0	0	0	1	0	0	0	0	0
KLHL41	0	0	0	0	0	1	0	0	0
CAMKV	0	0	0	0	0	0	0	1	0
FBRS	0	0	0	0	0	0	0	0	1
TMEM101	1	0	0	0	0	0	0	0	0
ERICH5	0	0	1	0	0	1	0	0	0
TCF19	0	0	0	0	0	0	0	1	0
USP41	1	0	0	0	0	0	0	1	0
TMEM127	1	0	0	0	0	0	0	0	0
MYCL	0	1	0	0	0	0	0	0	0
PLCD3	1	0	0	0	0	1	0	0	0
OPRL1	0	0	0	0	1	0	0	0	0
NME1	0	0	0	0	0	0	0	1	0
SSBP2	0	0	0	0	0	0	1	0	0
AOPEP	0	0	0	0	0	0	0	0	1
PRDM5	0	0	0	0	0	0	0	1	0
TNR	0	0	0	1	0	0	0	0	0
F2RL1	0	0	0	0	0	0	0	1	0
RSL24D1	0	0	0	0	0	0	0	1	0
CYSTM1	0	0	0	0	0	0	0	1	0
NPR3	0	0	1	0	1	0	1	0	1
HDAC3	0	0	0	0	0	0	0	1	0
FOXO6	0	0	1	0	1	1	0	0	0
CARD11	0	0	0	1	0	0	0	1	0
DRC7	1	0	0	0	0	0	0	1	1
ARSJ	0	0	1	0	1	0	1	0	0
CHCHD1	0	0	0	0	0	0	0	1	0
SCHIP1	0	0	1	0	0	0	0	0	0
FOXN3	0	0	0	0	0	0	0	1	0
RPL13A	0	0	0	0	0	0	0	0	1
MAPT	0	0	0	0	1	0	0	0	0
RCC1	0	0	0	0	0	0	0	1	0
CPE	0	0	0	0	0	0	0	0	1
BPGM	0	0	0	1	0	0	0	0	0
VWA7	0	0	0	1	0	0	0	0	0
MRPL22	0	0	0	0	0	0	0	1	0
IRX3	0	0	0	0	0	0	1	0	0
BOC	0	0	0	1	0	0	1	0	0
C19orf25	1	0	0	0	0	0	0	1	0
CYB5B	0	0	0	0	0	0	0	0	1
LIN28A	0	0	0	0	0	0	1	1	0
CHGA	0	0	0	0	0	0	0	1	0
TMEM131L	0	0	0	1	0	0	0	0	0
SSB	0	0	0	0	0	0	0	1	0
CCDC34	0	1	0	0	0	0	0	0	0
CARS2	1	0	0	0	0	0	0	0	0
DDIAS	0	0	0	0	0	0	0	1	0
TUBE1	0	0	0	0	1	0	1	0	0
QSOX2	0	0	0	0	0	0	0	1	0
PNPLA6	0	0	0	0	0	0	0	1	0
VPS9D1	0	0	0	0	0	0	1	0	0
GRIN2D	0	0	0	1	0	0	0	0	0
ARHGEF10	0	0	0	1	1	0	0	0	0
SCUBE1	0	0	0	0	1	0	1	0	1
LTK	1	0	1	1	0	0	0	0	0
GLE1	0	0	0	0	0	0	0	0	1
SNX16	0	0	0	0	0	0	0	1	0
UCHL1	0	0	0	1	0	0	0	1	0
BRF2	1	0	0	0	0	0	0	0	0
PIBF1	0	1	0	0	0	0	0	0	0
NHLRC3	0	0	0	0	1	0	0	0	0
ATL2	0	0	0	1	0	0	0	0	0
PSMA5	0	0	0	0	0	0	0	1	0
DPP9	1	0	0	0	0	0	0	0	0
CDC5L	0	0	0	0	0	0	1	0	0
FERMT1	1	0	1	0	0	0	0	0	0
STBD1	0	0	1	0	0	0	0	0	0
AK6	0	0	0	0	0	0	0	1	0
ADI1	1	0	0	0	0	0	0	0	0
ZBTB5	0	0	0	0	0	0	0	0	1
P2RX6	0	0	0	0	0	0	0	0	1
PSMD13	0	0	0	0	0	0	0	1	0
CLIP3	1	1	0	1	1	1	1	0	1
KATNA1	0	0	0	0	0	0	0	1	0
MRPL3	0	0	0	0	0	0	0	1	0
ERVMER34-1	0	0	0	1	0	0	0	1	0
EIF4A3	0	0	0	0	0	0	0	1	0
RSAD1	0	0	0	0	1	0	0	0	0
KCNJ4	0	0	0	0	0	0	1	0	0
NOCT	0	0	0	0	0	0	0	1	0
CR2	0	0	0	1	0	0	0	1	0
UTP6	0	0	0	0	0	0	0	1	0
KLHL31	0	0	0	0	0	0	0	0	1
TAP2	0	0	0	0	0	0	0	1	0
RBM18	1	1	1	0	1	1	1	0	1
TMEM199	0	0	0	0	0	0	1	0	0
CHEK2	0	0	0	0	0	0	0	1	0
HSP90AB1	0	0	0	0	0	0	0	1	0
TMEM86A	0	0	0	0	1	0	0	0	0
EPHA1	0	0	0	1	0	0	0	1	0
DVL3	0	0	0	0	0	1	0	0	0
ANAPC1	0	0	0	0	0	0	0	1	0
LARS2	0	0	0	0	0	0	0	1	0
CASZ1	0	0	1	0	0	0	0	0	0
AP2M1	0	0	0	0	0	0	0	1	0
EIF4B	0	0	0	0	0	0	0	0	1
DAB2	0	0	0	0	0	1	0	0	0
UBE2V2	0	0	0	0	0	0	0	1	1
SEMA4D	0	0	0	0	0	0	1	0	0
PEPD	0	0	0	0	0	0	0	1	0
AZU1	0	0	0	1	0	0	0	0	0
MARVELD3	1	0	0	0	0	0	0	1	0
MUL1	0	0	1	0	0	0	0	0	0
SLCO4C1	1	0	0	0	0	0	0	0	0
RTTN	0	0	0	1	0	0	0	0	0
PPARGC1A	0	0	0	0	0	1	0	0	0
TUBB3	0	0	0	0	0	0	0	1	0
IPO13	1	0	0	0	0	0	0	0	0
FKBP9	1	0	1	1	1	0	1	0	1
RNASEH1	0	0	0	0	0	0	0	1	0
FOXP1	0	1	0	0	0	0	0	0	0
KAT2A	0	0	1	0	0	0	0	0	0
TRMT11	0	0	0	0	1	0	0	0	0
DSCAML1	0	1	0	1	1	0	0	0	0
TET2	0	0	0	0	0	1	0	0	0
DCAF5	0	0	0	0	0	0	0	0	1
ALDH18A1	1	0	0	1	0	0	0	1	0
PLCD1	0	0	0	0	0	0	0	1	0
SNX9	0	0	1	0	0	0	0	0	0
NAA15	0	0	0	0	0	0	0	1	0
SLC2A6	0	0	0	0	0	0	0	1	0
GATA4	0	0	1	0	0	0	0	0	0
MRPL51	0	0	0	0	0	0	0	1	0
GPR55	0	0	0	0	0	1	0	0	0
APOBEC3D	0	0	0	0	0	0	0	1	0
CDKN2D	0	1	0	0	1	1	0	0	1
FAIM	0	0	0	0	0	0	0	0	1
UBE2O	0	0	0	0	0	0	0	1	0
NGDN	0	0	0	0	0	0	0	1	0
PCCB	0	0	0	0	0	0	0	1	0
SMIM24	0	0	0	0	0	0	0	1	0
ARMH4	0	1	0	0	0	0	0	0	0
LUC7L3	0	0	0	1	0	0	0	0	0
ELOA	0	0	0	0	0	0	0	0	1
KIF4B	0	0	0	0	0	0	0	1	0
FHOD1	0	0	0	0	0	0	0	1	0
GRPEL1	0	0	0	0	0	0	0	1	0
SPRYD3	0	0	0	0	0	0	0	0	1
CLIC5	1	0	0	0	0	1	0	0	0
EMID1	0	1	0	0	0	0	0	0	0
LCN15	0	0	0	0	1	0	0	0	0
CNBP	0	0	0	0	0	0	0	1	0
SOD3	1	0	1	0	0	0	0	0	0
ABRACL	0	0	0	0	0	0	0	1	0
PGA3	1	0	0	0	0	0	0	0	1
CORO6	0	0	1	0	0	0	0	0	0
GTF3C3	0	0	0	0	0	0	0	1	0
ZBTB25	0	0	0	0	1	0	0	0	0
MOCOS	0	0	0	0	0	0	0	1	0
PNO1	0	0	0	0	0	0	0	1	0
GEMIN2	0	0	0	0	0	0	0	1	0
KCNIP2	0	0	1	0	0	0	0	0	0
PFKL	1	0	0	0	0	0	0	0	0
SCG2	0	0	1	0	0	0	0	0	0
CDK5RAP3	0	1	0	1	1	0	1	0	0
CDH22	0	0	0	0	0	0	0	0	1
CD59	0	0	0	0	1	0	0	0	0
STAM2	0	0	1	0	0	0	0	0	0
ZCCHC17	0	0	0	0	0	0	0	1	0
CTSK	0	0	0	0	0	0	0	1	0
VWC2	1	0	0	0	0	0	0	0	0
WDR12	0	0	0	0	0	0	0	1	0
HSF4	0	0	0	1	0	0	0	0	0
MRPL35	0	0	0	0	0	0	0	1	0
PEBP1	0	0	0	0	0	0	0	1	0
TRMO	0	0	0	0	0	0	0	0	1
RAD51D	0	0	0	0	0	0	0	1	0
VASH1	0	0	0	0	0	1	0	0	0
SMARCD3	1	0	1	1	0	1	0	0	1
FILIP1L	0	0	0	0	0	0	1	0	0
TRIB1	0	0	0	0	0	1	0	0	0
CSRP2	0	0	0	0	0	0	1	0	0
HEY1	0	1	0	0	0	0	0	0	0
ACOT7	0	0	0	0	0	0	0	1	0
POR	0	0	0	1	0	0	0	0	0
BAG4	0	0	0	0	0	0	0	1	1
N4BP2L1	1	0	0	0	0	0	0	0	0
TMEM108	0	0	0	0	0	0	0	1	0
SCUBE3	0	0	1	0	0	0	1	0	0
SLC25A37	0	0	0	0	0	1	1	0	0
PGAP2	1	0	0	0	0	0	0	1	0
TMEM163	1	0	1	0	0	1	0	0	0
GATA6	0	0	1	0	0	0	0	0	0
MRPS18A	1	0	0	0	0	0	0	1	0
ASNSD1	0	0	0	0	0	0	0	0	1
GPR19	1	0	0	1	0	0	1	1	0
RRP36	0	0	0	0	0	0	0	1	0
NPTXR	0	0	1	0	0	0	0	0	0
NRROS	0	0	0	0	0	0	0	1	0
YAP1	0	0	0	0	0	0	0	0	1
INA	1	0	0	0	0	0	1	0	0
GNAL	0	0	0	0	0	0	0	1	0
CCT8	0	0	0	0	0	0	0	1	0
NODAL	0	0	0	0	0	0	0	1	0
DNAJB12	0	0	0	0	0	0	1	0	0
GRAP2	0	0	0	0	0	0	0	0	1
GPRIN1	0	0	0	0	0	0	0	1	0
JOSD2	0	0	0	0	0	0	0	0	1
CDK18	0	0	0	1	0	0	0	0	0
MRAS	1	0	0	0	0	0	0	0	0
THBS3	1	0	0	0	0	0	0	0	0
CENPP	0	0	0	0	0	0	0	1	0
TRERF1	0	0	0	0	0	0	0	1	0
ABITRAM	0	0	0	0	0	0	0	0	1
ANKRD1	0	0	1	0	0	0	0	0	0
CINP	0	0	0	0	0	0	0	1	0
CRYL1	0	0	0	0	0	1	0	0	0
CSPG5	0	0	1	0	0	0	0	0	0
POLR1F	0	0	0	0	0	0	0	1	0
FCHO1	0	0	0	0	0	0	0	1	0
SRL	1	0	0	0	0	1	0	0	1
MIS18BP1	0	0	0	0	0	0	0	1	0
TRIM26	0	0	0	0	0	0	1	0	0
R3HDM2	0	1	0	0	0	0	1	0	0
SALL3	0	0	0	0	0	0	0	1	0
NUSAP1	0	1	0	0	0	0	0	0	0
XRCC5	0	0	0	0	0	0	0	1	0
CDK5	0	1	1	1	0	1	0	0	1
CCND2	0	0	0	0	0	0	1	0	0
CD79B	0	0	0	1	0	0	0	1	0
CDK7	0	0	0	0	0	0	0	1	0
TKT	0	0	0	0	0	0	0	1	0
MST1R	0	0	0	1	0	0	0	0	0
EIF4A2	1	0	1	0	0	0	0	0	0
ZNF622	0	0	1	0	0	0	0	0	0
RAB26	0	0	0	0	0	0	0	1	0
ADAM11	0	0	0	0	0	1	0	0	1
IER3	0	0	0	0	0	0	0	1	0
NOX4	1	0	1	0	0	0	1	0	0
CD200R1	1	1	0	1	0	0	0	0	0
COPE	1	0	0	0	0	0	0	0	0
FADS2	0	0	0	1	0	0	0	0	0
MPV17L2	1	0	0	0	0	0	0	0	0
PRSS35	0	0	1	0	0	0	0	0	0
NCOA5	0	1	0	0	0	0	0	0	0
MESP1	0	0	0	0	0	0	0	1	1
ESAM	0	0	1	0	0	0	0	0	0
NOL10	0	0	0	0	0	0	0	1	0
HMCES	0	0	1	0	0	0	0	0	0
LMNB1	0	0	0	0	0	0	1	0	0
TMEM128	0	1	0	0	0	0	0	0	0
HAT1	0	0	0	0	0	0	0	1	0
ANKRD44	0	0	1	0	0	0	0	0	0
ZW10	0	0	0	0	0	0	0	0	1
PRPSAP2	0	0	0	0	0	0	1	1	0
UBE2L3	0	0	0	0	0	0	0	1	0
TBC1D26	0	0	0	0	1	0	0	0	0
CAPN11	0	0	0	0	0	0	0	1	0
TBC1D10A	0	0	0	0	0	1	0	0	0
PM20D2	1	0	0	0	0	0	0	0	0
NUS1	0	0	0	0	0	0	0	1	0
TDRP	0	0	0	1	0	0	0	0	0
VPS35	0	0	1	0	0	0	0	0	0
SMPDL3A	0	0	1	0	0	0	0	0	0
SMARCE1	0	1	0	0	0	1	1	0	1
WDR75	0	0	0	0	0	0	0	1	0
CLDN9	1	0	0	0	0	0	0	0	0
STAT3	0	0	0	0	0	0	0	0	1
CFAP20	1	0	0	0	0	0	0	0	0
PROM2	0	0	0	0	0	0	0	1	0
LRRTM1	0	0	0	0	0	0	0	0	1
SSBP1	0	0	0	0	0	0	0	1	0
TBKBP1	0	0	0	0	0	1	0	0	0
ADAM12	0	1	0	0	0	0	0	0	0
HVCN1	0	0	0	0	0	0	0	1	0
TTLL11	0	0	0	0	1	0	0	0	0
ASXL1	0	0	0	0	0	1	0	0	0
LIPG	0	0	0	0	0	0	0	0	1
SHMT2	0	0	0	0	0	0	1	1	0
ACAA1	1	0	0	0	0	0	0	0	0
ENG	0	0	1	0	0	0	0	0	0
AP1M1	0	0	0	0	0	0	1	0	0
TAS2R19	1	0	0	1	1	0	1	0	0
MAML3	1	0	0	0	0	0	0	0	0
GVQW3	0	1	0	1	0	0	1	0	0
INPP4B	0	0	1	0	0	0	0	0	0
GNA11	0	0	0	0	1	0	0	0	0
MRPL21	0	0	0	0	0	0	0	1	0
SIK2	0	0	0	0	0	0	0	0	1
BUD23	0	0	0	0	0	0	0	1	0
RIC8A	1	0	0	0	0	0	0	0	0
ITPR2	0	0	0	1	0	0	0	0	0
HACE1	0	0	0	0	0	0	1	0	0
CCNB1IP1	0	0	0	0	0	0	0	1	0
MMS19	0	0	0	0	0	0	0	1	0
CEP128	0	0	0	0	0	0	0	1	0
CCDC121	0	0	1	0	0	0	0	0	0
MGAT4B	1	0	0	1	0	0	0	0	0
PIWIL2	0	0	0	1	0	0	0	0	0
PTPRZ1	0	0	0	0	0	0	0	1	0
NOS3	1	0	0	0	0	0	0	0	0
PLA2G15	0	0	0	1	1	0	0	0	0
BBS5	1	1	0	0	0	1	0	0	1
CACNA1C	0	0	0	0	0	1	0	0	0
SMAD6	0	0	0	0	0	1	0	0	0
ARTN	0	0	0	0	0	0	0	1	0
SHB	0	0	1	0	0	0	0	0	0
ACYP1	0	0	0	0	0	0	0	1	0
MBNL2	1	0	0	0	0	0	0	0	0
PPIL1	0	0	0	0	0	0	0	1	0
JUNB	0	0	1	0	0	0	0	0	0
HECTD3	0	0	0	0	0	0	0	1	0
FAM126A	0	0	0	0	0	0	0	1	0
TP53I3	0	0	1	0	0	0	0	0	0
EIF4ENIF1	0	0	1	0	0	0	0	0	0
TRAF7	0	0	0	0	0	0	0	1	0
MAD2L1BP	0	0	0	0	0	0	0	1	0
GPC1	1	0	0	0	0	0	0	0	0
SLC52A3	0	0	0	0	0	0	0	1	0
SCPEP1	0	0	0	0	0	0	0	1	0
PLAAT5	0	0	0	0	0	0	0	1	0
APTX	0	0	0	0	0	0	0	1	0
GPX8	0	0	0	0	0	0	0	0	1
PHF7	0	0	0	0	0	0	0	1	0
RAC3	0	0	0	0	0	0	0	1	0
YWHAB	0	0	0	0	0	0	0	1	0
U2AF2	0	0	0	0	0	0	1	1	0
SSNA1	0	0	0	0	0	0	0	1	0
FAM167A	0	0	0	0	0	0	0	1	0
ULK2	1	0	0	0	0	0	0	0	0
ECPAS	0	0	0	0	0	0	0	1	0
GPR183	1	0	1	0	0	1	0	0	0
PLEKHA2	0	0	0	0	0	0	0	0	1
NAMPTP1	0	0	0	0	0	0	0	1	0
NACC1	0	0	0	0	0	0	0	1	0
DIXDC1	0	0	0	0	0	0	1	0	0
ARL6IP6	0	0	0	0	0	0	1	0	0
PRPF19	0	0	0	0	0	0	1	0	0
NAMPT	0	0	0	0	0	0	0	1	0
FZD4	1	1	0	1	0	1	1	0	0
CSRP3	0	0	1	0	0	0	0	0	0
SYK	0	0	0	0	0	0	0	1	0
YJU2	0	0	0	0	0	0	0	1	0
EPHB3	0	0	0	0	1	1	0	0	1
RABL2A	0	0	1	0	0	1	1	0	0
NFIC	0	0	0	0	0	1	0	0	0
WIPF1	0	0	0	0	1	0	0	0	0
EI24	0	0	0	0	0	0	0	1	0
FAM89A	0	0	0	0	1	1	0	1	1
PFDN4	0	0	0	0	0	0	0	1	0
IZUMO4	0	0	0	0	1	0	0	0	0
CLDN6	0	0	0	0	0	0	0	1	0
OGFR	0	0	0	0	1	0	0	0	0
PFDN1	0	0	0	0	0	0	1	0	0
SRR	0	0	0	0	0	0	1	0	0
ASPDH	0	0	0	0	0	0	0	0	1
NBN	0	0	0	0	0	0	0	0	1
SGMS2	0	0	1	0	0	0	0	0	0
ZNF703	0	0	0	0	0	0	1	0	0
SAV1	0	0	0	0	0	0	0	1	0
B3GAT2	0	0	0	0	0	0	0	1	0
NMNAT1	0	0	0	0	0	0	1	0	0
POP4	0	0	0	0	0	0	0	1	0
STK39	0	0	1	0	0	0	0	0	1
CDCA4	0	0	0	0	0	0	1	0	0
CHAC2	0	0	0	0	0	0	0	1	0
BIRC5	0	0	0	0	0	0	0	1	0
ZNF138	0	0	0	1	0	0	0	0	0
FRS2	0	0	0	0	0	1	0	0	0
UACA	1	0	0	0	0	0	0	0	0
CTR9	0	0	1	0	0	0	0	0	0
NOG	1	0	1	1	0	0	0	0	0
SLC35B1	1	0	1	0	0	0	0	1	0
STKLD1	0	0	1	0	0	0	0	0	0
HAUS4	0	0	0	0	1	0	0	0	0
MINK1	1	1	0	0	0	0	0	0	0
TMEM178A	1	0	1	1	1	0	0	0	0
MAPKAP1	0	0	0	0	0	0	0	1	0
SRFBP1	0	0	0	0	0	0	0	1	0
ALDOA	0	0	1	0	0	0	0	0	0
SGCD	0	0	0	0	1	0	0	0	0
RNF25	0	0	1	0	0	0	0	0	1
SF3B2	0	0	0	0	0	0	0	1	0
ITGA10	1	0	0	0	0	0	0	0	0
SYT3	0	0	0	1	0	0	0	0	0
CDCA7	0	0	0	0	0	0	0	1	0
RNF43	1	0	0	0	0	0	0	0	0
PSMA4	0	0	0	0	0	0	0	1	0
TRAPPC10	0	0	0	0	0	0	0	1	0
AURKB	0	0	0	0	0	0	0	1	0
SNRPG	0	0	0	0	0	0	0	1	0
RND3	0	0	0	0	0	0	1	0	0
SDF2L1	0	0	0	0	0	0	0	1	0
KCTD16	1	0	1	1	1	0	0	0	1
MTIF2	0	0	0	0	0	0	0	1	0
COMMD5	1	0	1	0	0	0	0	1	0
PGAM5	0	0	0	0	0	0	0	1	0
IQCE	1	1	0	0	0	0	1	0	0
CCDC96	0	0	1	0	0	0	0	0	0
NHSL1	0	0	0	1	0	0	1	0	0
RBM45	0	0	0	0	0	0	0	0	1
PRKCSH	0	0	0	0	0	0	0	1	0
YWHAQ	0	0	0	0	0	0	0	1	0
UBA6	0	1	0	1	1	0	1	1	1
EEF1AKMT1	1	1	1	1	0	1	0	0	1
USP5	0	0	0	0	0	0	0	1	0
GTF2IRD2B	0	0	0	0	0	1	0	0	1
BMPER	0	0	0	1	0	0	0	0	0
PKD1L1	1	0	0	0	0	0	1	0	0
UTP4	0	0	0	0	0	0	0	1	0
SIX5	0	1	0	0	0	0	0	0	0
GOLGA6D	0	0	0	1	0	0	0	0	0
ZNF296	0	0	0	0	0	0	0	1	0
ISYNA1	0	1	1	1	1	1	1	0	0
HSD17B4	0	0	0	0	0	0	0	1	0
PABPC1	0	0	0	0	0	0	0	1	0
PWP1	0	0	0	0	0	0	0	1	0
KIFAP3	1	0	1	0	0	1	0	0	1
C2orf68	0	0	0	0	1	0	0	0	0
WDR86	0	0	0	0	0	0	1	0	0
TUBA1A	0	0	0	0	0	0	0	0	1
IL11RA	1	0	0	0	0	0	0	0	0
TRIM8	0	0	0	1	0	0	0	0	0
SEPTIN5	0	0	1	0	0	1	0	0	0
RIPPLY2	0	0	0	0	0	0	0	0	1
HIRIP3	0	0	0	0	0	0	0	1	0
DHCR24	0	0	0	0	0	0	0	1	0
MCCC2	0	0	0	0	0	0	0	1	0
ABCB8	0	0	0	1	0	0	0	0	0
PTPRB	0	0	0	1	0	0	0	1	0
DNAH2	0	0	0	0	1	0	0	0	0
FAM214A	0	0	1	0	0	0	0	0	0
HSD17B14	0	0	0	1	0	0	0	0	0
GBP3	0	0	1	0	0	0	0	0	0
C9orf78	0	0	0	0	0	0	0	1	0
MRPL47	0	0	0	0	0	0	0	1	0
H2BC21	0	0	1	0	0	0	0	0	0
COL9A2	0	0	0	0	0	0	0	1	0
STK17B	1	0	0	0	1	1	0	0	0
FAM3C	0	0	0	1	0	0	0	0	1
ZNF142	0	0	0	0	0	1	1	1	0
BANF1	0	0	0	0	0	0	0	1	0
FZD2	0	0	0	1	0	0	0	0	0
TCHP	0	0	0	0	0	0	0	1	0
SSC4D	1	1	0	1	1	0	0	0	0
ZNF451	0	0	0	1	0	0	0	0	0
PPP4R1	0	0	1	0	0	0	1	0	1
SPTBN5	0	0	0	0	0	1	0	0	0
BCAS3	0	0	0	1	0	0	0	0	0
APOM	1	0	0	0	0	0	0	0	0
RRAD	1	0	0	0	0	0	0	0	0
CFAP20DC	0	0	0	1	0	0	0	1	0
KLRG2	0	0	0	0	0	0	0	1	0
TNFSF4	0	0	0	0	0	0	0	0	1
NRIP1	0	1	0	0	0	0	0	0	0
BRCA2	0	0	0	0	0	0	0	1	0
AGO4	1	0	0	0	0	0	0	0	0
CCDC169	0	0	0	0	0	0	0	1	0
GLRX3	0	0	0	0	0	0	0	1	0
BNIP3	0	0	0	0	0	0	0	1	0
ITGA8	0	1	0	0	1	0	0	0	1
LTBP4	0	0	0	0	1	0	0	0	0
ITGA6	1	0	0	0	0	0	0	0	0
CCDC92	1	1	1	1	1	1	1	0	1
EXOC7	0	0	1	0	0	0	0	0	0
SMIM29	0	0	0	0	0	0	0	1	0
VSNL1	0	0	0	0	0	0	0	1	0
TCEA3	1	0	1	0	0	1	0	0	0
LTBP1	0	0	0	0	0	1	0	0	0
FAN1	0	0	0	0	0	0	1	0	0
TP53I11	0	0	0	0	0	1	0	0	0
RAD51	0	0	0	0	0	0	1	0	0
MYH13	0	0	0	0	0	1	0	0	0
SLC25A36	0	0	0	0	0	0	1	0	0
PFDN6	0	0	0	0	0	0	0	1	0
STAG1	1	0	0	0	0	0	0	0	0
COL23A1	1	0	0	0	0	0	0	0	0
ZAP70	0	0	0	0	0	0	0	0	1
PHF5A	0	0	0	0	0	0	0	1	0
OSCP1	1	0	0	0	0	0	0	0	0
BMP1	0	0	0	0	0	1	0	0	0
TMEM104	0	0	0	0	0	0	0	1	0
ATMIN	0	0	0	0	0	0	0	0	1
PLS1	0	0	0	0	0	0	0	1	0
CPNE5	0	0	0	0	0	0	0	0	1
ADCY2	0	0	0	0	0	0	0	1	0
APIP	0	0	0	0	0	0	0	1	0
DNAJC7	0	0	0	0	0	0	0	1	0
SKA3	0	0	0	0	0	0	0	1	0
CENPC	0	0	0	0	0	0	0	0	1
EEF2	1	0	0	0	1	0	0	1	1
RIOK3	1	0	0	0	0	0	0	0	1
NCCRP1	0	0	1	0	0	0	0	0	0
SYNDIG1L	0	1	0	1	1	0	0	1	0
TOP1	0	0	0	0	0	0	1	1	1
SLC38A2	0	0	0	0	0	0	1	0	0
KDM2A	1	0	0	0	0	1	1	0	1
HSPB7	0	0	0	0	0	1	0	0	0
BCL2L12	0	0	0	0	0	0	0	1	0
RBM20	0	0	0	0	0	1	0	0	0
PPM1J	0	0	0	0	1	0	0	1	0
HERPUD1	1	0	0	0	0	0	0	0	0
MRPL4	0	0	0	0	0	0	0	1	0
GAS2	0	0	1	0	0	0	0	0	0
MMP23B	0	0	0	1	1	0	1	0	0
PPP1R9B	0	1	0	0	0	0	0	0	0
MIX23	0	0	0	0	0	0	0	1	0
EFCAB6	0	0	0	0	0	0	1	0	0
HGFAC	0	0	1	0	0	0	0	0	0
CDC25B	0	0	0	0	0	0	1	0	0
PSMD11	0	0	0	0	0	0	0	1	0
CUEDC1	0	0	0	0	1	0	0	0	0
BCL9L	0	0	0	0	1	0	0	0	0
PSPC1	1	1	0	0	0	0	1	0	1
GPATCH11	0	0	1	0	0	0	0	0	0
FABP6	0	0	0	1	0	0	0	1	0
CNPY1	0	0	0	0	0	0	0	1	0
MARCHF6	0	0	0	0	1	0	0	0	0
LARS1	0	0	0	0	0	0	0	1	0
TTC32	0	0	0	1	1	0	0	0	0
TRABD2A	0	0	0	0	0	0	0	1	0
ADCY4	0	0	0	1	0	0	0	0	0
ZNF587	1	0	1	0	0	1	0	0	1
TMA16	0	0	0	0	0	0	0	1	0
PTP4A3	0	0	0	0	0	1	0	0	0
RHOBTB2	0	0	0	0	0	0	0	0	1
AKT1S1	0	0	0	0	0	0	1	0	0
PLLP	0	1	0	0	0	0	0	0	0
GPAT3	0	0	1	0	0	0	0	0	0
PMP22	0	0	0	0	1	0	0	0	0
SMIM11	1	0	0	1	0	0	0	0	1
MYO7B	1	0	1	0	0	0	0	0	0
PPP5C	0	0	0	0	0	0	0	1	0
HBS1L	0	0	0	0	0	0	0	1	1
SLC36A1	0	0	0	0	0	0	0	1	0
E2F6	0	0	0	0	1	0	0	0	0
TXNRD1	0	0	0	0	0	0	0	1	0
SRSF5	0	0	0	1	0	0	0	0	0
BZW1	1	0	0	1	0	0	0	1	1
SCD	0	0	0	1	0	0	0	1	0
DCUN1D5	0	0	0	0	0	0	0	1	0
JUP	0	0	0	0	0	0	1	0	0
BCO1	1	1	0	1	0	1	1	0	0
EIF2B1	0	0	0	0	0	0	0	1	0
ERG28	0	0	0	0	0	0	0	1	0
CCZ1	0	0	0	0	0	0	0	1	0
ZNRD2	0	0	0	0	0	0	0	1	0
NDC80	0	0	0	0	0	0	1	0	0
TLCD5	0	0	0	1	0	0	0	0	0
MAZ	0	0	0	1	0	0	0	0	0
SNAI2	0	0	0	1	0	0	0	0	0
CPTP	1	0	0	0	0	0	0	0	0
MTUS1	1	0	0	1	0	1	0	0	0
NOP53	0	0	0	0	0	0	1	0	0
AHNAK	0	0	0	0	0	0	1	0	0
TXNL4A	1	0	0	0	0	0	0	1	0
SSH2	0	0	0	0	0	0	0	0	1
BICD1	0	0	0	0	1	0	0	0	0
ENGASE	0	0	1	0	1	0	0	0	0
GALNT5	0	0	0	0	0	0	1	0	0
FLVCR2	0	0	0	0	0	0	0	1	0
HYI	1	0	1	0	0	0	1	0	0
DTX2	0	0	0	0	0	0	0	1	0
ATP7B	0	1	0	0	0	0	0	0	0
HK1	0	0	1	0	0	0	0	0	0
URM1	0	0	0	0	0	0	0	1	0
EIF1AD	0	0	0	0	0	0	0	1	1
ZNF326	0	0	0	0	0	1	1	1	1
PHC1	0	0	0	1	0	0	0	0	0
GFRA2	0	1	0	0	0	0	0	0	0
ORC3	0	0	0	0	0	0	0	1	0
SIT1	0	0	0	1	0	0	0	1	0
PLXNA4	0	1	1	0	0	0	0	0	1
TAF2	0	0	0	0	0	0	0	0	1
CTSD	0	0	0	0	0	0	0	1	0
CCDC59	0	0	0	0	0	0	0	1	0
SMTNL1	0	0	0	0	1	0	0	0	0
PDCD10	0	0	0	0	0	0	0	1	0
C3orf14	0	0	0	0	0	0	0	1	0
EMG1	0	0	0	0	0	0	0	1	0
ITGB2	0	0	0	0	1	0	0	0	0
NANOS1	0	0	1	0	0	0	1	1	0
PHF10	0	0	0	0	1	0	0	0	0
NBAS	1	0	0	0	0	0	0	0	0
SNX32	0	0	0	0	1	0	0	0	0
DGAT2	1	0	0	0	0	0	0	0	0
CLCC1	0	0	0	0	0	0	0	1	0
DAGLB	0	0	0	0	0	0	0	1	0
UNC5B	0	0	1	0	0	0	0	0	0
FGFR1OP2	1	0	1	1	1	0	0	0	1
NUP107	0	0	0	0	0	0	0	1	0
FAM13C	0	0	1	0	1	1	0	0	0
ZC3H12C	1	0	0	0	0	1	1	0	1
HGD	0	0	0	0	0	1	0	0	0
MXD1	1	0	0	0	0	0	0	0	0
CAPS	0	0	1	1	1	1	0	0	0
SBK2	0	0	0	1	0	0	0	0	0
SEC16A	0	1	0	0	0	0	0	0	0
PSME3	0	0	0	0	0	0	0	1	0
GFUS	0	0	0	0	0	0	0	1	0
ACVR1C	0	0	0	0	0	0	0	1	0
CDC42EP3	0	0	1	0	0	0	0	0	0
MYL6	0	0	0	1	0	0	0	0	0
WRAP53	0	0	0	0	0	0	0	1	0
CHST14	1	0	0	0	0	0	0	0	0
RABGGTB	0	0	0	0	0	0	0	1	0
RRM2	0	0	0	0	0	0	0	1	0
ZC3HC1	0	0	0	0	0	0	0	1	0
ICAM1	0	0	0	0	0	0	0	1	0
PXK	1	0	0	0	0	0	0	0	0
CCNF	0	0	0	0	0	0	1	0	0
ABT1	0	0	0	0	0	0	0	1	1
WSB2	0	0	0	0	0	0	0	0	1
PHAX	0	0	0	0	0	0	0	1	0
TIE1	0	0	0	0	0	0	0	1	0
IL17RC	0	0	1	0	0	0	0	0	0
WASHC2A	0	0	0	0	0	0	0	0	1
MISP3	1	0	1	0	1	0	0	0	0
CREG2	1	0	0	0	0	0	0	0	0
ELOVL5	0	0	0	0	0	0	0	1	0
LONP2	0	0	0	1	0	0	0	0	0
C1QBP	0	0	0	0	0	0	0	1	0
SRCAP	0	0	0	0	0	0	1	0	0
TNFRSF19	1	0	1	0	0	0	0	0	0
ANKRD27	0	0	0	0	0	0	0	1	0
LDHAL6A	0	0	0	1	0	0	0	0	0
ELAVL1	0	0	0	0	0	0	0	0	1
LPCAT4	0	0	0	0	1	0	0	0	0
ARL4A	0	0	0	0	0	0	0	1	0
DEPDC5	0	0	0	0	0	0	1	0	0
ANK3	0	1	1	1	0	1	0	0	1
LEFTY2	0	0	1	0	0	0	0	0	0
GTPBP8	0	0	0	1	0	0	0	0	0
SMC4	0	1	0	0	0	0	0	1	0
RIMS3	0	0	1	0	0	0	0	0	0
NUDT1	0	0	0	0	0	0	0	1	0
SUPT6H	1	0	0	0	0	0	0	0	0
CFTR	0	0	0	0	0	0	1	0	0
KLHL22	0	1	1	0	0	0	0	0	0
VAMP3	0	0	0	0	1	0	0	0	0
NUMA1	0	0	0	0	0	1	0	0	0
TMX1	0	0	0	1	0	0	0	0	0
SORL1	0	0	0	0	0	0	1	0	0
POLR1D	0	0	0	0	0	0	0	1	0
PKD1	0	0	1	0	0	0	1	0	0
USP7	1	0	0	0	0	0	0	1	0
MTERF3	0	0	0	0	0	0	0	1	0
PDP2	0	0	0	0	0	0	0	1	0
MRPL13	0	0	0	0	0	0	0	1	0
GNG11	0	1	0	0	0	0	0	0	0
DERA	1	0	0	0	0	0	1	1	0
POLR2L	1	0	1	0	0	0	0	1	0
SCN3B	0	0	0	0	0	0	0	0	1
RXRB	0	0	0	0	0	0	0	0	1
CBX6	0	0	0	0	1	0	0	0	0
HPS3	0	0	0	0	0	0	0	1	0
STOML1	0	0	1	0	0	0	0	0	0
CERS4	0	0	0	0	0	0	0	1	0
WDR93	0	0	0	0	0	0	0	0	1
ROPN1L	0	0	0	0	0	1	0	0	0
PPP2CB	0	0	0	0	0	1	0	0	0
BDNF	0	0	0	0	0	0	1	0	0
RPRD1A	0	0	0	0	0	0	0	1	0
PCF11	0	0	0	0	0	0	0	1	0
BRMS1	0	0	0	0	0	0	0	1	0
SFRP2	0	0	0	0	0	0	0	1	0
FLI1	0	1	1	1	0	0	1	0	0
INMT	0	0	0	0	0	0	1	0	0
TMEM115	0	0	0	0	0	1	0	0	0
KIF23	0	0	0	0	0	0	1	1	0
AOC3	0	0	0	1	0	0	0	0	0
EIF3K	0	0	0	0	0	0	0	1	0
PUF60	0	0	0	0	0	0	1	0	0
SUSD3	0	0	0	0	0	0	0	1	0
RB1CC1	0	0	0	0	0	0	0	1	0
PDGFRB	0	0	0	1	1	1	1	0	1
USO1	0	0	0	0	0	0	0	1	0
DHRS3	1	0	0	0	0	0	0	0	0
MASTL	0	0	0	0	0	0	0	1	0
FBXO40	1	0	0	0	0	0	0	0	0
PRICKLE2	1	1	1	1	0	1	1	0	0
CREB3	0	0	1	0	0	0	0	0	0
SYT1	0	0	0	1	0	0	0	0	0
TSC22D4	1	0	0	1	0	0	0	0	0
RUVBL1	0	0	0	0	0	0	0	1	0
INO80	0	0	0	0	0	0	1	1	0
ITPK1	0	0	0	0	0	0	0	1	0
YARS2	0	0	0	0	0	0	0	1	0
MRPL44	0	0	0	0	0	0	0	1	0
RNF19A	1	0	0	0	0	0	0	0	0
PITPNC1	0	0	0	0	0	0	0	1	0
MLYCD	1	0	1	0	0	1	0	0	0
TEAD1	0	0	0	0	0	1	0	0	0
CLDN19	0	0	0	0	0	0	0	1	0
PDLIM3	0	0	0	0	0	1	0	0	0
LIMD2	0	0	0	0	0	0	0	1	0
FBXL18	0	0	0	0	0	0	0	1	0
SH2D5	0	0	0	0	0	0	0	1	0
OXA1L	0	0	0	0	0	0	0	1	0
TFCP2	0	0	0	0	0	0	0	1	0
OLFML2B	1	1	0	0	0	0	0	1	0
SFXN2	0	0	0	0	0	0	0	1	0
ZNF45	0	1	0	0	0	1	1	1	0
UBE2J1	1	0	0	0	0	0	0	0	0
BICC1	1	0	0	0	0	1	1	0	1
ERH	0	0	0	0	0	0	0	1	0
ZPR1	1	0	0	0	0	0	0	1	0
ZNF729	0	0	0	0	0	0	0	1	0
KLHDC2	0	0	0	0	0	1	1	0	0
RPL3L	0	0	0	1	1	0	0	1	0
LATS2	0	0	0	0	1	0	0	0	0
ENTPD5	1	0	0	1	1	0	0	1	0
DNAI1	0	1	0	0	0	0	0	0	0
MTURN	0	0	0	0	0	0	0	0	1
TLE6	0	0	1	0	0	0	0	0	0
TMEM120B	0	0	0	0	1	0	0	0	0
RARA	0	0	0	0	0	1	0	0	0
CCT5	0	0	0	0	0	0	0	1	0
ARHGEF39	0	0	0	0	0	0	0	1	0
MOK	0	1	0	1	1	1	1	0	1
ZBTB38	0	0	0	0	0	0	0	0	1
WASHC5	0	0	0	0	0	0	0	1	0
SCARF1	0	0	1	0	0	0	0	0	0
GPN2	0	0	0	0	0	0	0	0	1
STAM	0	1	0	0	0	0	0	0	0
ARRDC3	0	1	1	1	0	0	1	0	1
ABCA9	0	0	0	0	0	0	1	0	0
PITHD1	0	0	0	0	0	0	0	1	0
KBTBD2	0	0	1	0	0	0	0	0	0
PARPBP	0	0	0	0	0	0	0	1	0
NTAN1	0	0	0	0	0	0	0	1	0
INPP5K	1	0	1	0	0	1	0	0	0
MGAT3	0	0	0	0	1	0	0	0	0
HSPA9	0	0	0	0	0	0	0	1	0
LINGO1	0	0	0	1	0	0	0	0	0
GCSH	0	0	0	0	0	0	0	1	0
ZC3H6	0	0	1	0	0	0	0	0	0
CHTF8	0	0	0	0	0	0	1	0	0
SLC35E1	0	0	1	0	0	0	0	0	0
B4GALT6	0	0	0	0	0	0	0	1	0
DDX23	0	0	0	0	0	0	1	1	0
NFE2	0	0	0	1	0	0	0	0	0
YES1	0	0	0	0	0	0	0	1	0
TLN1	0	0	0	0	0	0	0	0	1
DDX24	1	0	0	0	0	0	0	0	0
DPYSL3	1	0	0	0	0	0	0	0	0
POC1B	1	0	0	0	0	0	0	0	0
NDUFS6	0	0	1	0	0	0	0	0	0
PALLD	0	0	0	1	0	0	0	0	0
ACSS3	0	0	0	0	0	0	0	1	1
CCT7	0	0	0	0	0	0	0	1	0
HID1	0	0	1	0	0	0	0	0	0
PGA4	1	0	0	0	0	0	0	0	0
STRIP1	0	0	0	1	1	0	1	0	1
SZT2	1	1	1	1	1	1	1	0	1
TRIM36	0	0	0	0	0	0	0	1	0
DNPH1	1	0	0	0	0	0	0	1	0
KICS2	0	0	0	0	0	0	0	1	0
PHF21B	0	0	0	1	0	0	0	1	0
SLC12A4	1	0	0	0	0	0	0	0	0
CWF19L2	0	0	0	0	0	0	0	1	0
RPF2	0	0	0	0	0	0	0	1	0
CLEC1A	0	0	0	1	0	0	0	0	0
ERCC1	0	0	0	1	0	0	0	0	0
ATP6V0D2	0	0	0	1	0	0	0	0	1
MAGOHB	0	0	0	0	0	0	0	1	0
NMB	0	0	0	0	0	0	0	1	0
INSIG1	0	0	0	0	0	0	0	1	0
ALKAL2	0	0	0	1	0	0	0	0	0
MRPL23	1	0	0	0	0	0	0	0	0
HTR3A	0	0	0	0	0	0	0	1	0
STOML2	0	0	0	0	0	0	0	1	0
ADSL	0	0	0	0	0	0	0	1	0
FAM71F2	1	0	1	1	0	1	0	0	0
GPD1L	0	0	1	0	0	0	0	0	0
CCIN	0	0	0	0	0	0	0	1	0
ATP5F1B	0	0	1	0	0	0	0	0	0
MRPL48	0	0	0	0	0	0	0	1	0
TENT5B	0	0	0	1	0	0	0	1	0
WDR37	0	0	0	0	0	1	0	0	0
MKI67	0	0	0	1	0	0	0	0	0
PHB	0	0	0	0	0	0	0	1	0
BACE1	0	0	0	1	0	0	0	0	0
SLC16A5	0	0	0	1	0	0	0	1	0
HCN2	0	0	0	0	0	0	0	1	0
C2orf49	0	0	0	0	0	0	0	1	0
METTL21A	1	0	0	0	0	0	0	0	0
PSMG2	0	0	0	0	0	0	0	1	0
ADGRG6	1	0	0	0	0	0	0	0	0
ACAN	1	1	0	0	0	1	0	0	0
ZFAND3	1	0	0	0	0	0	0	0	0
TSC22D1	0	1	0	0	0	0	0	0	0
TPO	0	0	0	0	0	0	0	1	0
PGAP4	0	0	0	0	0	0	0	1	0
CBLN1	0	0	0	0	0	0	0	1	0
PDE3A	0	0	0	0	1	0	0	0	0
PTOV1	1	1	1	0	0	1	1	0	0
WDR76	0	0	0	0	0	0	0	1	0
MYO18B	1	0	1	0	0	1	0	0	0
ZNF860	0	0	0	1	0	0	0	1	0
PRSS12	0	0	0	0	0	0	0	1	0
SCO1	0	0	0	0	0	0	0	1	0
NUF2	0	0	0	0	0	0	0	1	0
SLC18B1	0	0	0	1	0	0	0	0	0
HSPA8	0	0	0	0	0	0	0	1	0
MRPL37	0	0	0	0	0	0	0	1	0
DNAJC30	0	0	1	0	0	0	0	0	0
PIK3R1	0	1	0	0	0	0	0	0	0
PAIP2	1	0	1	0	0	0	0	1	1
KARS1	0	0	0	0	0	0	0	1	0
UBTF	0	0	0	0	0	0	0	0	1
PI16	1	0	0	0	0	0	0	0	0
NR2F2	1	0	0	0	1	0	0	0	1
ADGRD1	0	0	1	0	0	0	0	0	0
ADAMTS13	0	0	0	0	1	0	0	0	0
GDF6	0	0	0	0	0	0	1	0	0
MAST2	0	0	0	0	0	1	1	0	0
ULK1	0	0	0	0	0	0	1	0	0
ITGB3BP	0	0	0	0	1	0	0	0	0
SLC6A9	0	0	0	0	0	1	0	1	0
KIF24	0	0	0	0	0	1	0	0	0
CASP10	1	0	0	0	0	0	0	0	0
EOMES	0	0	0	0	0	0	0	1	0
WBP11	0	0	0	0	0	0	0	1	0
ZMAT4	0	0	1	0	0	0	0	0	0
VMAC	0	1	0	0	0	0	0	0	0
SUN2	1	0	0	0	0	0	0	0	0
CRYZL1	0	0	0	0	0	0	1	0	0
CCDC87	0	0	0	0	0	0	0	0	1
COPS3	0	0	0	0	0	0	0	1	0
SLC25A34	0	0	0	0	0	0	1	0	0
AKAP8L	0	0	0	0	0	0	1	0	0
HECA	0	0	0	1	0	0	1	0	0
NOM1	0	0	0	0	0	0	0	1	0
RBM12B	0	0	0	0	1	0	1	1	1
CREG1	0	1	0	0	0	0	0	0	0
KDM6B	0	1	0	0	0	0	0	0	0
CADM1	0	0	0	0	1	0	0	0	0
ATP6V1C2	0	0	0	0	0	0	0	1	0
IL15RA	0	0	0	0	0	0	0	1	0
PCDH7	1	0	1	1	0	0	1	0	1
MED15	1	0	0	0	0	0	0	0	0
NSMCE3	0	0	0	1	0	0	0	0	0
TNXB	0	0	0	0	0	0	1	0	1
MSH2	0	0	0	0	0	0	0	1	0
RFPL2	0	0	0	0	0	0	0	0	1
PGPEP1	0	0	1	0	0	0	0	0	0
KIFC1	0	0	0	0	0	0	0	1	0
ZNF416	0	0	0	0	0	0	0	1	0
PGBD2	0	0	0	0	0	1	1	0	0
VPS50	0	0	1	0	0	0	0	0	0
ID4	0	1	0	0	0	0	0	0	1
PGGHG	0	0	0	0	1	0	0	1	0
PODN	0	0	0	0	0	1	0	0	0
PSMC1	0	0	0	0	0	0	0	0	1
CALD1	0	0	0	1	0	0	0	0	0
RSPO2	0	0	0	0	0	1	0	0	0
SEZ6L	0	0	0	0	0	0	0	1	0
MRTFA	0	0	0	0	0	0	1	0	0
ECE1	0	0	0	0	0	1	0	0	0
SURF2	0	0	0	0	0	0	0	1	0
INSRR	0	1	0	0	0	0	0	0	0
MYL12A	1	0	1	0	0	0	0	0	0
RDH11	0	0	0	1	0	0	0	0	0
AP3M1	0	0	0	0	0	0	1	0	0
SNU13	0	0	0	0	0	0	0	1	0
CSRNP2	0	0	0	0	0	0	1	0	0
KCTD11	0	0	0	0	0	1	0	0	0
ABCC9	0	0	1	0	0	0	0	0	0
GPR162	0	0	0	1	0	0	0	0	0
MTFR1L	0	0	1	0	0	0	0	0	0
MFGE8	0	0	0	1	0	0	0	0	0
TMIGD2	0	0	0	0	1	0	0	0	0
PRKD1	0	0	0	0	0	0	1	0	0
OIP5	0	0	0	0	0	0	0	1	0
GAL	0	0	0	0	0	0	0	1	0
GADD45B	1	0	0	0	0	0	0	0	0
PNRC1	1	0	0	0	0	0	0	0	0
ARPC5L	0	0	0	0	0	0	0	1	0
PHF1	0	0	0	1	0	0	1	0	0
AMN1	0	0	0	0	0	0	0	1	0
TRIM39	0	0	0	0	0	0	0	1	0
TNC	0	0	0	0	0	0	0	0	1
CMTM7	1	0	0	0	0	0	0	0	0
USB1	1	0	0	0	0	0	0	0	1
TMEM237	0	0	0	0	0	1	0	0	0
IER2	0	0	0	0	0	0	0	1	0
ROBO3	1	0	0	1	1	1	1	1	0
NCR3LG1	0	0	0	0	0	0	1	0	0
TGM2	0	0	0	0	0	1	0	0	0
NR6A1	0	0	0	0	0	0	0	1	0
SREBF2	0	0	1	0	0	0	0	0	0
TMEM267	0	0	0	0	1	0	0	0	0
ALDOC	1	0	0	0	0	0	0	0	0
MKRN2	0	0	1	0	0	0	0	0	0
NUP43	0	0	0	0	0	0	0	1	0
FASN	0	0	0	0	0	0	0	1	0
SUSD5	0	1	1	1	1	0	1	0	1
SYNM	1	0	1	0	0	1	0	0	0
C5orf49	0	0	0	0	1	0	0	0	0
IL27RA	0	0	0	0	0	0	0	1	0
VMP1	0	0	1	0	0	0	0	0	0
DPAGT1	0	0	0	0	0	0	0	1	0
DYNC1H1	1	0	0	0	0	1	1	0	0
EPS8	0	0	1	0	1	0	1	0	0
PARD3B	1	0	1	0	0	1	1	0	0
ENTPD7	1	1	0	1	0	1	1	0	1
DEAF1	1	0	1	0	1	1	1	0	0
RNF185	1	0	0	0	0	1	0	0	0
PNISR	0	0	0	1	1	0	1	0	0
NRDC	0	0	0	0	0	0	0	1	0
AARS1	0	0	0	0	0	0	0	1	0
PRXL2A	1	0	0	0	0	0	0	0	0
DKK2	1	0	0	0	0	0	0	0	0
DHODH	0	0	0	0	0	0	0	1	0
TMEM147	0	0	0	0	0	0	0	1	0
STAC3	0	0	1	1	0	0	0	0	0
SMC2	0	0	0	0	0	0	0	0	1
MRPS7	1	0	0	0	0	0	0	1	0
PDSS1	0	0	0	0	0	0	0	1	0
CSPP1	1	0	0	0	0	0	0	0	0
C4orf50	0	0	0	0	0	1	0	0	0
GATA3	0	1	0	0	0	0	0	0	0
LRRC8C	1	0	0	1	1	0	0	0	1
NFE2L1	0	0	0	0	0	0	0	1	0
DDX54	0	0	0	0	0	0	0	1	0
RBM42	0	0	0	0	0	0	1	0	0
CPT1A	0	0	1	0	0	0	0	1	0
ABCA2	0	0	0	0	1	0	0	0	0
RBM23	0	0	0	0	1	0	0	0	0
PGM2	0	0	0	0	0	0	0	1	1
CASP3	0	0	0	0	0	0	0	1	0
IMPG2	1	0	1	1	0	0	1	0	1
TAP1	0	0	0	0	0	0	0	1	0
GIT2	0	0	0	0	0	0	0	0	1
DDC	1	1	0	0	0	0	0	0	0
PTPN11	0	0	0	0	0	0	0	1	0
RPS27A	1	0	0	0	0	0	0	0	0
UBL3	1	0	0	0	0	0	0	0	0
TDG	0	0	0	0	0	0	0	1	0
MAP6	1	0	1	0	1	1	1	0	1
C3	0	1	0	0	0	1	0	1	0
NT5DC1	1	0	0	0	0	0	0	0	0
KPNA2	0	0	0	0	0	0	0	1	0
SETD4	0	0	0	0	0	0	0	1	0
EIF3F	0	0	0	0	0	0	0	1	0
ATG16L2	0	0	0	0	0	0	1	0	0
VCAM1	0	0	1	0	0	1	0	0	0
FBXL7	0	0	0	0	1	0	0	0	0
C1orf198	0	0	0	0	0	0	0	0	1
SLC24A2	1	0	0	0	0	0	0	0	0
SLC25A21-AS1	0	0	0	0	0	0	0	0	1
KBTBD8	0	0	0	0	0	0	0	1	0
GAPDH	0	0	0	0	0	0	0	1	0
MDC1	0	1	0	0	0	0	0	0	0
LBHD1	0	0	0	0	0	0	0	1	0
WDPCP	0	0	0	0	0	0	0	1	0
UNC45B	0	0	0	0	0	1	0	0	0
MSX1	0	0	0	0	0	0	0	0	1
A4GALT	0	0	1	0	0	0	0	1	0
IGIP	1	0	0	1	0	0	0	0	0
H2BC12	0	0	1	0	0	0	0	0	0
CAVIN1	0	0	0	0	0	1	0	0	0
ALG10	0	1	0	1	1	1	1	1	0
VSIR	1	0	0	0	0	0	0	0	0
MRM2	0	0	0	0	0	0	0	1	0
ZC3H4	0	0	0	0	0	0	1	0	0
NQO1	0	0	0	0	0	0	0	1	0
NME5	0	0	0	0	0	0	1	0	0
MTHFD2	0	0	0	0	0	0	1	1	0
YIF1B	0	0	0	0	0	0	0	1	0
ZNF778	0	0	0	0	0	1	0	0	0
PABPC3	0	0	0	0	0	0	0	1	0
CRPPA	0	1	0	0	0	0	0	0	0
NAPA	0	0	1	0	0	0	0	0	0
RBM4B	0	0	0	0	0	1	1	0	0
FKBP3	0	0	0	0	0	0	0	1	0
DPPA4	0	0	0	0	0	0	0	1	0
ART5	0	1	0	0	0	0	0	0	0
NRBP1	0	0	0	0	0	0	0	1	0
SMIM5	1	0	0	0	0	1	0	0	0
CRYBB1	0	0	0	0	0	0	0	1	0
PPID	1	0	0	0	0	0	0	1	0
DRC3	1	0	0	0	0	0	0	0	0
DUSP1	0	0	0	0	0	1	0	0	0
MARS2	0	0	0	0	0	0	0	1	0
GCNT7	0	0	0	0	0	0	0	0	1
RXRG	0	0	0	0	0	0	0	0	1
FARSA	0	0	0	0	0	0	0	1	0
PTMA	0	0	0	0	0	0	0	1	0
NHP2	0	0	0	0	0	0	0	1	0
LRPPRC	0	0	0	0	0	0	0	1	0
KLF13	0	0	1	0	0	0	0	1	0
LOXL1	0	0	0	0	0	0	1	0	0
BORA	0	0	0	0	0	0	0	1	0
LRP2	0	0	0	0	1	0	1	0	1
ACAP3	1	0	1	1	1	1	1	0	0
PLAA	0	0	0	0	0	0	0	1	0
POLR2D	0	0	0	0	0	0	0	1	0
GTF2IRD2	0	0	0	0	0	0	1	0	0
ZNF771	0	0	0	0	0	0	0	1	0
RET	0	0	0	0	0	0	0	1	0
WRAP73	0	0	0	0	0	0	0	1	0
NOL7	0	0	1	0	0	0	0	0	0
WDR33	0	0	0	0	0	0	0	1	0
PITPNA	0	0	1	0	0	0	0	0	0
GYS1	1	0	0	0	0	0	0	0	0
NDRG2	0	0	1	0	0	0	0	0	0
DDT	0	0	0	0	0	0	0	1	0
F10	0	0	0	1	0	0	0	0	0
RAG1	0	0	0	1	0	0	0	1	0
FAM166B	0	1	0	0	0	0	0	0	0
OCEL1	0	0	0	0	1	0	0	0	0
HES7	0	0	0	0	0	0	0	1	0
PROK2	0	0	0	1	0	0	0	0	0
DNAJB9	1	0	1	1	0	1	0	0	1
MRPL18	0	0	0	0	0	0	0	1	0
KCTD10	0	0	0	0	0	1	0	0	0
CRYBG2	1	0	0	0	0	0	0	0	0
NT5C2	1	0	1	0	0	1	1	0	0
PSMC6	0	0	0	0	0	0	0	1	0
CASKIN2	1	0	0	0	0	0	0	0	0
ZNF436-AS1	0	0	1	0	0	0	0	0	0
MCAT	0	0	0	0	0	0	1	0	0
IGF2BP2	0	0	0	1	1	0	1	1	1
ETF1	0	0	0	0	0	0	0	1	0
FAM241A	1	0	1	1	0	0	0	0	1
GPRIN3	1	0	0	0	0	0	0	0	0
CCDC51	0	0	0	0	0	0	0	1	0
TTC37	0	1	0	0	0	0	0	0	0
GBP1	0	0	1	0	0	0	0	0	0
MAPK15	0	0	0	0	1	0	0	0	0
NCBP1	0	0	0	0	0	0	0	1	0
TTC33	0	0	0	1	0	0	0	0	0
SLC16A12	0	0	1	0	0	0	0	0	0
GOT2	0	0	0	0	0	0	0	1	0
CLDN7	0	0	0	0	0	0	0	1	0
GNPTAB	0	0	0	1	0	0	0	1	0
MYOZ2	0	0	1	0	0	0	0	0	0
F2	1	0	0	0	0	0	0	0	0
COG7	0	0	0	0	1	0	0	0	0
FRMD3	0	0	1	0	0	1	0	0	0
GSTP1	0	0	0	0	0	0	0	1	0
ESPL1	0	0	0	0	0	0	0	1	0
EOGT	0	0	0	0	0	0	0	1	0
CLP1	0	0	0	0	0	0	1	0	0
TRAPPC3	0	0	1	0	0	0	0	0	0
BRIX1	0	0	0	0	0	0	0	1	0
SIK1	0	0	0	0	0	1	0	0	0
DAPK3	0	0	1	0	0	0	0	0	0
MSH3	0	0	0	0	0	0	0	1	0
TTF1	0	0	0	0	0	0	0	1	0
DNAJC2	0	0	0	0	0	0	0	1	0
DPP3	0	0	0	0	0	0	0	1	0
CCNB2	0	0	0	0	0	0	0	1	0
BTBD9	0	1	1	0	1	0	1	0	1
PRDX1	1	0	0	1	0	0	0	1	0
PLPPR5	0	1	0	1	1	0	0	1	0
TRAPPC6A	1	0	0	0	0	0	0	0	0
ADHFE1	0	0	0	0	0	0	1	0	0
MAP3K3	0	0	0	0	1	0	0	0	0
KIF11	0	0	0	0	0	0	1	0	0
IFIT2	0	0	0	0	0	0	0	1	0
GIPR	1	1	1	1	0	1	0	0	0
MSRB3	0	0	0	0	0	1	0	0	0
TENM3	0	0	0	0	0	0	0	1	0
CA4	0	1	0	0	0	0	0	0	0
MATR3	0	0	0	0	0	0	0	1	0
ECT2	0	0	0	0	0	0	0	1	0
PALMD	0	0	0	0	0	0	1	0	0
COPB1	1	0	0	0	0	0	0	0	0
OPN1SW	1	0	0	1	0	0	0	1	0
SLCO4A1	0	0	0	1	0	0	0	0	0
CAMK2A	0	0	0	0	0	1	0	0	0
CTCF	0	1	0	0	0	0	0	0	1
PCSK9	0	0	0	0	0	0	0	1	0
DPH5	0	0	0	0	0	0	0	1	0
NIF3L1	0	0	0	0	0	0	0	1	0
AFAP1	1	1	1	0	0	1	0	0	0
FBXO43	0	0	0	0	0	0	0	1	0
XPA	1	1	1	1	1	1	1	0	1
RASSF9	0	0	0	0	0	0	0	1	0
SRPRA	0	0	0	0	0	0	0	1	0
CRMP1	0	0	0	0	0	0	0	1	0
MTHFR	0	0	0	0	0	1	0	0	0
CHMP5	0	0	1	0	0	0	0	0	0
LYN	0	0	0	1	0	0	0	1	0
PLEKHG2	0	1	0	0	0	0	0	0	0
FAM78A	1	0	0	0	0	0	0	0	0
TIMP2	1	0	1	0	1	1	1	0	1
PUM3	0	0	0	0	0	0	0	1	0
TTLL4	0	0	0	0	0	0	0	1	0
SUPT4H1	1	1	1	1	0	0	0	0	1
ABCB6	0	0	0	1	0	0	0	0	0
TMEM87A	0	0	0	1	0	0	0	0	0
ABHD17B	0	0	0	0	0	0	0	1	0
ALS2CL	0	0	0	1	1	0	0	1	0
OSBPL11	0	1	0	0	0	0	0	0	0
MRPS18B	0	0	0	0	0	0	0	1	0
MYADML2	0	0	1	0	0	0	0	0	0
STAC	0	0	0	0	0	0	0	0	1
EIF3E	0	0	0	1	0	0	0	0	0
HAS2	0	1	0	0	0	0	0	0	0
ARMC5	0	0	0	0	1	0	0	0	0
ARFGAP2	0	0	0	0	0	0	1	0	0
CNTN5	1	0	0	0	0	0	0	0	0
NELFB	0	0	0	0	0	0	0	1	0
UGT3A1	0	0	0	1	0	0	0	0	0
PHYKPL	0	0	1	1	0	0	0	0	0
TMEM98	1	1	1	1	1	1	1	0	1
FXN	0	0	0	0	0	0	0	1	0
VWA3B	0	0	0	1	0	0	0	0	0
EBNA1BP2	0	0	0	0	0	0	0	1	0
EXOSC9	0	0	0	0	0	0	0	1	0
ENOX1	0	1	0	0	1	0	0	0	1
PGM1	0	0	0	0	0	0	0	1	0
UMPS	0	0	0	0	0	0	0	1	0
PLXNC1	1	0	0	0	0	0	0	0	0
BANP	0	0	0	0	0	0	1	0	0
TMED2	1	0	0	0	0	0	0	0	0
BCL10	1	0	0	0	0	0	0	0	0
DUSP6	0	1	0	0	0	0	0	0	0
TYMS	0	0	0	0	0	0	1	1	0
ZNF90	0	0	0	1	0	0	0	1	0
MYO7A	0	0	0	0	0	0	0	0	1
PBLD	0	0	1	0	0	0	0	0	0
COMMD4	0	0	0	0	0	0	0	1	0
TRIM67	1	0	0	0	0	0	0	0	0
APCDD1	0	0	0	0	0	0	0	1	0
PPP1R12B	0	0	0	0	0	1	0	0	0
FABP5	0	0	0	0	0	0	0	1	0
DAG1	0	0	0	1	0	0	0	0	0
ZNF445	0	0	0	0	0	0	1	0	0
GDE1	0	0	0	1	0	0	0	0	0
AXL	0	0	0	0	1	0	0	0	0
PLCB3	0	0	0	0	0	0	0	1	0
PRDM11	0	0	0	0	1	0	0	0	0
KIFC3	1	0	1	1	0	0	0	0	1
ANAPC15	1	0	0	0	0	0	0	0	0
RANBP6	1	0	0	0	1	0	0	1	0
TGFB1	0	1	0	0	0	0	0	0	0
EGR1	0	0	1	0	0	0	1	0	1
MAEA	1	0	0	0	0	0	0	0	0
ZBTB7C	0	0	0	0	0	0	0	0	1
TIMM21	0	0	0	0	0	0	0	1	0
FOXC2	0	0	0	0	1	0	0	0	0
INSR	1	0	1	1	1	1	0	0	0
ATG2A	0	0	0	0	0	1	0	0	0
NUP58	0	0	0	0	0	0	0	1	1
RPA2	0	0	0	0	0	0	1	0	0
ITGB3	0	0	0	0	1	0	0	0	0
STEAP3	0	0	0	0	0	0	0	1	0
BTAF1	1	0	0	0	0	0	0	0	0
SPACA9	0	1	0	0	0	0	0	0	0
CASP6	0	0	0	1	0	0	0	0	1
PDLIM1	1	0	1	0	0	0	0	1	0
GRIA1	0	0	1	0	0	1	0	0	1
RUNDC1	0	0	0	0	0	1	0	0	0
SLC41A2	1	0	0	0	0	0	0	0	0
HRAS	0	0	0	0	0	0	0	1	0
MCRS1	0	0	0	0	0	0	0	1	0
BSN	0	0	0	0	0	0	1	0	0
PECR	1	0	0	0	0	0	0	1	0
CACNG4	1	1	0	0	0	0	0	0	1
LGR5	0	0	0	0	0	0	0	1	0
MED13L	0	0	0	0	0	0	0	0	1
BORCS8	0	0	1	0	0	0	0	0	0
MLH1	0	0	0	0	0	0	0	0	1
PSMD12	0	0	0	0	0	0	0	1	0
PSMB10	0	0	1	0	0	0	0	0	0
SLC37A1	1	0	0	0	0	0	0	1	0
DDX1	0	0	0	0	0	0	0	1	0
DDX27	0	0	0	0	0	0	0	1	0
ZFR	0	0	1	0	0	0	0	0	0
CDC26	0	0	0	0	0	0	0	1	0
MYCBP	0	0	0	0	0	0	0	1	0
CEND1	1	0	0	0	0	0	0	0	0
ATP13A2	0	0	0	0	0	0	0	1	0
PYGB	1	0	0	0	0	0	0	0	0
EIF2B2	1	0	1	0	0	0	0	0	0
GADD45GIP1	0	0	0	0	0	0	0	1	0
SPCS2	1	0	0	0	0	0	0	0	0
PIK3CB	0	0	0	0	0	0	0	1	0
CKS2	0	0	0	0	0	0	0	1	0
WNT4	0	0	0	0	1	0	0	0	0
TTC28	1	0	0	0	1	1	1	0	1
DGKB	0	0	0	1	0	0	0	0	0
ADGRF3	0	0	0	0	0	0	0	1	0
MTHFD1	0	0	0	0	0	0	0	1	0
GSR	1	0	0	0	0	0	0	0	0
ADGRB2	0	0	1	0	1	0	0	0	0
PDLIM7	0	0	0	0	0	1	0	0	0
NUP214	0	0	0	0	0	0	0	0	1
FAM78B	0	0	0	1	0	0	0	0	0
COG3	0	0	0	0	0	0	1	0	0
FAM110C	0	0	1	0	0	0	0	0	0
TICRR	0	0	0	0	0	0	1	1	0
NCBP2	0	0	0	0	0	0	0	1	0
DYNC2LI1	0	0	0	0	0	0	0	0	1
TCTA	1	0	0	0	0	0	0	0	0
CRIP3	0	0	0	1	0	0	0	0	0
EHBP1	0	0	0	0	1	0	0	0	0
[truncated: 1,001 more rows]

## Sheet: Radiation
id	m0	m1	m2	m3	m4	m5	m6	m7	m8
2022-12-01	0	1	0	0	0	0	0	0	0
AANAT	0	0	0	0	1	0	0	1	1
ABCB5	0	0	0	0	0	0	1	0	0
ABCB8	1	0	0	0	1	0	1	0	1
ABCD3	0	1	1	0	1	0	0	0	1
ACBD5	1	0	0	1	1	0	1	0	1
ACO2	0	0	0	0	1	1	0	0	0
ACTB	0	0	0	0	0	1	0	0	0
ACVR2A	1	0	0	0	1	1	1	1	1
ADAM11	1	0	0	0	0	0	0	0	0
ADAMTSL3	0	0	0	0	1	0	0	0	0
ADGRG7	0	1	0	1	0	0	0	0	0
ADH1B	0	1	0	0	0	0	0	0	0
ADORA2A	1	0	0	0	0	1	0	1	1
ADRM1	0	0	0	0	0	1	0	1	1
AEN	1	0	0	1	0	1	1	1	1
AJUBA	0	0	0	0	0	0	1	0	0
AK7	1	0	0	0	0	0	0	1	1
AKIP1	0	1	0	0	0	0	0	0	0
AKR1D1	1	1	1	1	1	1	0	0	1
ALG1	1	1	1	0	1	1	0	0	0
ALG10B	1	1	0	0	0	1	0	1	0
AMER3	0	1	1	1	1	0	0	0	0
ANGPTL3	0	0	1	0	0	0	0	0	0
ANGPTL7	1	1	0	0	1	1	1	0	0
ANK2	0	1	0	1	1	0	0	0	0
ANKRA2	1	1	1	0	0	1	1	0	0
ANKRD19P	0	0	0	0	0	0	0	1	0
ANKRD35	0	0	0	0	0	1	1	0	1
APC	0	0	0	0	0	0	1	0	1
APH1A	0	0	0	1	0	0	1	1	1
ARF4	1	0	1	1	0	1	0	1	0
ARHGAP25	0	0	0	1	0	0	0	0	0
ARHGDIA	0	1	0	1	0	1	1	1	1
ARPC4	0	0	0	1	0	0	0	1	1
ART4	0	0	0	0	0	1	1	1	0
ASB7	0	0	0	1	0	0	0	0	0
ASPN	0	1	0	0	0	0	0	0	1
ASXL2	1	1	1	1	1	0	1	0	1
ATG4C	1	1	1	0	0	0	0	0	0
ATP13A4	0	0	0	1	0	0	1	1	0
ATP6V0C	0	0	0	1	0	1	0	1	1
ATP6V1H	1	0	0	0	0	0	0	0	0
ATP8B1	0	1	0	0	1	0	0	0	0
ATP9B	1	0	1	0	0	0	0	0	0
ATR	0	0	0	0	0	1	1	0	0
AWAT2	0	1	0	0	1	0	0	0	0
B4GALNT2	0	1	0	0	1	1	1	1	0
BAIAP2L1	1	1	1	0	0	1	0	1	0
BCL7B	0	0	0	0	0	0	0	1	1
BICC1	1	0	0	0	1	0	0	0	0
BIN3	0	0	1	0	0	0	0	0	0
BLID	0	1	0	1	0	0	0	1	0
BOLL	0	1	0	0	0	0	0	1	0
BPESC1	1	0	0	0	1	1	0	1	0
BPIFA2	0	0	0	1	0	1	0	1	1
BPIFA4P	0	1	0	0	1	0	1	1	1
BRD8	1	1	1	0	1	0	1	0	1
C10orf25	0	0	0	1	0	0	0	0	0
C10orf67	1	0	0	0	0	1	1	1	1
C11orf65	1	1	0	0	1	0	0	0	0
C11orf84	1	0	0	1	1	0	0	0	1
C16orf46	0	0	0	0	0	1	1	1	0
C16orf54	1	1	0	1	0	1	0	0	0
C16orf96	0	0	0	0	1	0	0	0	0
C19orf57	0	0	0	1	0	0	0	0	0
C1orf122	1	0	0	0	0	0	0	1	1
C1orf174	0	1	0	0	0	0	0	0	0
C20orf24	0	0	0	1	0	0	0	0	1
C22orf31	0	0	0	0	0	0	1	0	0
C3orf35	1	0	1	0	1	0	0	0	0
C6orf136	1	0	0	0	0	0	0	0	0
C7orf25	0	1	0	0	0	0	0	0	1
C7orf60	0	1	0	0	0	0	1	0	0
CASP2	1	0	1	0	0	1	0	1	0
CASQ2	0	1	0	1	0	0	0	0	0
CBR4	1	0	1	0	1	0	0	0	0
CCBL1	0	0	1	1	1	0	0	1	1
CCDC150	0	1	0	0	0	0	0	0	0
CCDC172	0	1	1	1	0	0	1	1	0
CCDC173	0	1	0	1	1	1	1	1	0
CCDC51	1	1	0	0	1	1	0	0	1
CCDC63	0	0	0	1	0	0	0	0	0
CCDC89	0	1	1	0	0	0	0	0	0
CCL19	0	0	0	1	1	0	1	0	0
CCL7	0	0	0	0	0	1	0	0	0
CCNG2	0	1	1	0	0	0	1	0	0
CCNT1	1	0	0	0	0	1	0	1	1
CD69	0	1	1	1	1	1	1	1	1
CD82	0	0	0	0	0	1	0	0	0
CD83	0	0	0	1	0	1	0	1	1
CDCA2	0	0	0	1	0	1	1	1	0
CDH15	0	1	0	1	1	0	1	1	1
CDHR1	0	0	1	0	0	0	1	1	0
CDKN1A	0	0	0	0	0	1	1	0	0
CDKN1B	0	0	0	0	0	1	0	0	0
CEACAM20	0	1	1	0	1	0	1	1	1
CEP170B	0	0	0	0	1	0	0	1	0
CEP295	0	1	1	0	0	0	0	0	0
CES1P1	0	1	0	0	0	0	0	0	0
CFAP157	0	0	0	1	1	1	0	1	0
CFC1	0	1	0	0	0	0	1	1	1
CFL1	0	1	0	1	0	1	0	1	1
CHGA	0	1	0	0	1	1	1	1	0
CILP2	0	0	0	1	0	0	0	1	0
CKAP4	1	0	1	1	1	0	0	1	0
CLEC5A	0	0	0	0	0	0	0	1	0
CLPX	1	0	0	0	0	0	0	0	0
CNOT8	0	1	0	0	0	0	0	0	0
COA5	0	0	0	0	1	1	1	0	0
COL12A1	1	1	1	1	1	0	0	0	0
COL14A1	0	0	0	0	1	0	0	0	0
COPA	0	0	0	0	0	1	0	1	1
COX15	0	0	0	0	0	0	1	0	1
CREB1	1	1	0	1	1	1	1	0	1
CREBRF	0	1	0	0	0	0	0	0	0
CRYGD	0	1	0	1	0	0	0	0	0
CRYM	0	0	0	1	0	0	0	0	0
CSAG2	0	0	1	0	0	0	0	0	0
CSN2	0	1	0	1	1	0	1	1	0
CUL4A	1	0	0	0	1	1	1	1	0
CUTC	0	1	1	0	0	0	0	0	0
CWC25	0	0	0	1	0	1	1	1	1
CXCL17	0	0	0	1	0	0	1	0	0
CYP4F22	1	1	1	1	0	0	0	0	0
DBIL5P	1	0	0	0	0	1	0	1	1
DCAF5	1	1	1	0	0	1	0	0	0
DCN	0	1	0	1	0	0	0	0	0
DCP2	0	1	0	0	0	0	0	0	0
DCUN1D1	0	1	0	1	0	0	0	0	0
DDA1	0	0	0	0	0	0	0	1	0
DDIT3	0	0	1	1	0	1	1	0	1
DEFB121	0	0	0	0	0	0	1	0	0
DGCR9	0	0	1	0	0	0	0	0	0
DHDH	0	1	0	0	0	0	0	0	0
DICER1	0	1	1	0	0	0	1	0	1
DNAAF3	0	0	0	0	0	1	0	0	0
DNAH14	0	0	0	1	0	0	0	0	0
DNAJB11	0	0	0	0	0	0	0	1	1
DNAJC5G	0	0	0	0	0	0	0	1	1
DNMT3L	0	1	0	1	0	0	0	0	0
DOCK11	1	1	1	0	0	1	1	0	1
DPH1	0	0	0	0	0	1	1	0	0
DPP8	0	0	1	0	1	0	0	0	0
DSG4	1	0	0	0	0	1	0	0	1
DUSP6	0	0	0	0	0	0	1	1	1
DYDC2	0	0	0	1	0	0	1	1	0
ECD	1	0	0	0	0	1	1	1	1
EDEM3	1	0	0	0	1	0	0	0	0
EDN1	1	0	1	1	0	1	1	0	1
EHD2	0	1	0	0	0	0	0	0	0
EHD4	1	0	0	0	0	1	1	0	1
EIF1	1	0	0	0	0	1	0	1	0
ELAVL2	0	0	0	1	0	0	1	0	1
ELMSAN1	1	1	1	0	1	0	1	0	0
EMP3	1	0	0	0	0	1	0	1	0
ERICH4	0	0	0	0	1	0	0	0	0
ETF1	1	0	1	0	0	1	1	1	1
EVI5L	0	1	0	0	1	0	0	1	0
EXOSC4	0	0	0	0	1	0	0	0	1
F11	1	0	0	0	0	0	0	1	0
F12	0	0	0	1	0	0	0	1	1
FAAP24	0	1	0	0	0	0	0	0	0
FABP6	0	1	0	1	1	0	0	0	0
FAM162B	1	0	0	0	1	0	1	0	0
FAM167B	0	0	0	1	0	1	0	1	1
FAM170A	0	0	0	0	0	0	1	0	1
FAM186A	0	1	0	1	0	1	1	1	1
FAM45A	0	1	1	1	1	0	1	0	0
FAM47C	1	0	1	1	1	0	0	0	0
FAXC	0	1	0	1	1	1	1	1	1
FBP2	0	0	0	1	0	0	0	1	1
FBRS	0	0	1	0	1	1	0	1	0
FBXL12	0	0	0	0	0	0	0	1	0
FBXL4	1	0	0	0	1	1	1	1	1
FBXO33	0	1	0	0	0	0	0	0	0
FERD3L	0	0	0	0	0	0	0	0	1
FERMT3	0	0	0	0	0	0	0	1	0
FKBP8	0	1	0	0	0	1	0	1	0
FKBP9P1	0	0	0	0	0	0	0	0	1
FLRT2	0	0	0	0	1	0	0	0	0
FOSB	0	0	0	1	0	1	1	0	0
FOSL1	0	0	1	1	0	1	1	1	0
FOXK1	0	1	0	0	1	0	1	1	1
FRRS1	1	1	0	0	1	0	0	0	0
FSTL5	0	0	0	0	0	0	0	1	0
GADD45A	1	0	0	0	0	1	0	0	0
GATAD1	0	1	0	0	1	0	0	0	0
GGT1	1	0	0	1	0	1	1	1	1
GH2	0	1	1	1	1	0	0	0	0
GIMAP6	1	1	0	0	0	0	0	0	1
GIMAP8	0	1	0	0	0	0	0	0	0
GK5	0	0	0	0	1	1	0	0	0
GKN1	1	1	1	0	0	0	0	1	0
GLRB	1	0	1	0	0	1	1	1	1
GMEB1	1	0	1	1	0	1	0	1	1
GML	0	0	0	1	0	0	0	0	0
GNMT	0	1	0	1	1	0	0	0	0
GNPAT	1	0	0	0	0	0	0	0	0
GOLGA5	1	0	1	0	0	0	1	0	1
GPD1	0	0	0	0	0	0	0	0	1
GPR17	0	1	1	1	0	0	1	0	1
GPR32	0	1	0	1	0	0	1	0	1
GPR45	1	1	0	0	1	0	0	0	0
GRASP	0	0	0	0	0	0	0	1	0
GREM1	0	0	0	0	0	1	0	1	0
GRK6	0	0	0	0	0	1	1	1	1
GSG1	0	1	0	0	0	0	0	0	0
GTF2F1	0	1	0	0	0	1	1	1	0
GTF2IRD1	1	0	0	0	0	0	1	0	0
GUCA2B	0	0	0	0	0	0	1	0	0
GUCY1A2	1	0	0	1	0	0	0	1	0
GUCY2F	0	1	0	0	1	0	0	0	0
HAUS6	1	0	0	0	0	0	0	0	0
HBP1	0	0	0	0	0	0	1	0	1
HECTD1	0	0	0	0	0	0	0	1	1
HEPACAM2	1	0	0	0	0	0	0	0	0
HERC4	0	1	1	1	0	0	1	0	0
HFM1	0	0	0	1	0	0	0	0	0
HHEX	0	1	0	1	0	0	1	0	0
HIST1H3B	0	0	1	0	0	0	0	1	0
HIST1H3C	0	1	0	1	0	1	0	0	0
HLA-DMA	0	0	0	0	0	0	1	0	0
HNF4A	0	1	1	1	1	0	1	0	0
HOXB6	0	1	0	1	0	1	0	1	1
IER5	0	0	0	1	1	1	1	1	1
IFNA4	0	0	0	1	0	0	0	1	0
IGF1	0	1	1	1	1	0	1	0	0
IGFL3	0	0	0	1	1	1	0	1	1
IGHV3-13	0	1	0	0	0	1	0	0	0
IGKV1-27	0	0	0	0	0	0	1	0	0
IKZF4	1	0	0	0	1	1	1	1	1
IL11	0	0	0	1	0	0	1	1	1
IL25	0	1	0	1	1	0	1	1	1
IL2RG	0	1	0	0	0	0	0	0	0
ING1	0	0	0	0	0	0	1	0	0
INSIG2	0	1	1	0	1	0	1	0	1
INSL6	0	0	1	0	0	0	0	0	0
INSRR	0	0	0	1	0	0	0	0	0
INTS10	0	1	1	0	0	0	0	0	0
IQCF1	1	1	0	0	0	0	1	0	0
IRF2BPL	1	1	0	0	1	0	0	1	0
IRGQ	0	0	0	0	0	1	1	0	1
IRS2	0	1	0	0	0	0	0	0	0
ITPKC	0	0	0	0	1	0	0	1	1
ITPR2	0	0	0	0	1	0	0	0	0
JMJD6	0	0	0	1	1	0	0	0	1
JUN	1	0	1	0	0	0	0	1	1
KBTBD7	0	1	1	0	0	0	0	0	0
KCNA5	0	1	0	1	0	0	0	0	0
KCNG3	0	0	1	0	0	0	0	0	0
KCTD18	1	1	0	0	1	1	0	0	0
KDM6B	0	0	1	1	0	0	1	1	1
KDM7A	1	0	1	0	1	0	0	0	0
KIR3DX1	0	0	0	1	0	0	0	1	1
KLF10	1	0	0	0	0	1	1	1	1
KLHDC8A	0	1	0	1	1	0	0	0	0
KLHL18	1	0	1	0	1	1	0	0	1
KLHL21	0	0	0	0	0	0	0	0	1
KLHL29	0	0	1	1	0	0	1	0	0
KLHL8	0	0	1	0	0	0	0	0	0
KLK10	1	0	0	0	1	0	1	0	0
KLK14	0	1	1	1	1	0	0	0	1
KLKP1	0	0	0	0	0	0	1	0	1
KRT79	0	1	0	1	1	1	1	0	1
KRT8	0	1	0	1	1	0	0	0	0
KU-MEL-3	0	0	0	1	0	0	0	1	0
LARP7	0	0	0	1	0	1	1	1	1
LCE1B	0	0	0	1	0	0	0	1	0
LGALS8-AS1	0	1	0	1	1	0	1	0	0
LGI1	0	1	1	1	0	0	0	0	0
LGI2	0	0	0	1	0	0	0	0	0
LIFR	0	0	0	0	0	0	1	0	1
LINC00314	0	1	1	0	1	1	1	0	0
LINC00470	1	1	1	1	1	0	0	0	0
LINC00612	0	0	0	1	0	0	0	0	0
LINC00656	0	0	0	1	0	0	0	0	0
LINC00943	0	0	0	0	0	1	0	0	1
LINC01465	0	0	0	1	0	1	0	1	0
LINC01605	0	0	0	0	1	0	0	0	1
LMO4	0	0	0	0	0	0	1	0	0
LMTK2	0	0	0	0	1	0	0	0	0
LOC100128922	0	0	0	1	0	0	0	0	0
LOC100287934	1	1	1	0	0	0	0	0	1
LOC100289585	0	1	0	0	0	1	1	1	0
LOC102724200	0	0	0	0	0	0	0	1	0
LOC102724929	0	1	0	0	0	1	1	1	1
LOC105376948	0	0	0	1	0	0	0	0	0
LOC105378742	1	0	0	0	0	1	0	1	1
LOC541472	0	0	0	0	0	0	1	1	0
LOC643406	0	0	0	1	0	1	0	0	1
LOC646938	0	0	0	0	0	1	0	1	1
LONRF1	0	0	1	1	1	0	1	1	1
LPO	0	1	0	1	1	0	0	0	1
LRRC59	0	0	0	1	0	0	0	1	0
LRRC8E	1	1	0	0	0	0	1	0	0
LYST	0	1	1	0	1	0	0	0	0
MACF1	0	1	0	0	0	1	1	0	0
MAFB	0	0	1	1	0	0	1	1	1
MAFF	0	0	0	0	0	0	0	1	0
MAGI1	0	0	1	1	0	1	1	1	1
MAP1LC3A	0	0	0	0	0	0	0	1	0
MAP1LC3B	0	0	1	0	0	0	1	0	0
MAPKAPK2	1	0	1	1	0	1	1	0	1
MAPRE1	0	0	1	0	0	0	0	1	0
MARCKSL1	1	0	0	0	0	0	0	0	0
MAT2B	0	1	0	1	1	0	0	0	0
MBTD1	1	0	0	0	1	0	0	0	0
MED12L	1	1	0	1	0	0	0	0	0
MED23	1	0	0	0	1	0	1	1	1
MEDAG	0	0	0	0	0	1	0	0	0
MEP1B	1	0	1	0	0	0	0	0	1
METAP1D	1	1	1	1	1	0	0	0	0
METRNL	0	0	0	1	0	1	1	1	0
METTL21C	0	0	1	1	0	1	1	1	0
MID1	0	0	0	0	0	0	0	1	0
MIR22HG	0	0	0	1	0	0	0	0	0
MISP	1	0	0	1	1	0	0	0	0
MKLN1	1	0	0	0	0	0	0	0	0
MKX	1	1	0	0	1	0	1	1	0
MLF2	0	0	0	1	0	1	1	1	1
MMGT1	1	0	0	0	0	1	1	1	1
MN1	1	1	0	0	0	0	0	0	0
MORF4L2	1	0	1	0	0	0	0	0	0
MSH6	1	0	1	0	1	0	0	1	1
MST1	1	1	0	1	0	0	1	0	0
MTF1	1	0	0	1	1	1	1	1	1
MTFMT	1	1	1	0	1	0	0	0	0
MTX1	0	0	0	1	1	1	1	1	1
MYBPHL	1	0	0	0	1	1	1	1	1
MYC	1	0	0	0	0	1	1	1	1
MYH7B	0	0	0	1	0	0	0	0	0
MYL1	1	1	0	1	1	0	0	1	1
MYNN	0	0	1	1	0	1	1	1	1
MYOG	0	0	0	1	0	0	0	0	0
NCAM1-AS1	0	1	0	1	1	0	0	0	0
NCAPH2	1	0	1	0	1	1	1	1	1
NCK1	1	1	1	0	0	0	0	1	1
NDST3	0	1	0	0	0	0	0	0	0
NECAP1	1	0	1	1	0	0	0	0	1
NEURL1B	0	0	0	0	1	1	1	0	0
NFE2	0	0	0	0	1	0	1	0	0
NFKB2	0	0	0	1	1	0	0	0	1
NFKBID	1	0	0	0	0	1	0	1	0
NGF	0	0	0	0	1	1	0	0	1
NIPA2	0	0	0	0	0	1	0	1	0
NIPAL4	0	1	0	1	0	0	1	0	0
NIPBL	1	1	0	1	1	0	0	0	0
NLK	1	1	0	0	1	0	0	0	1
NME6	1	0	1	0	1	1	1	0	0
NOCT	0	0	0	0	0	1	1	0	0
NOM1	1	0	0	0	1	1	1	1	1
NOX1	1	0	1	0	1	0	1	1	0
NPAP1	0	0	0	0	0	1	1	0	0
NPAS4	0	1	0	1	0	1	0	0	1
NPS	0	0	0	1	1	0	0	0	1
NR1H2	0	0	0	0	0	0	0	0	1
NR2C2	1	0	1	0	1	0	1	1	0
NR3C1	0	1	1	0	1	0	1	1	0
NTNG1	0	0	0	0	1	0	0	0	0
NYAP2	0	1	0	1	0	1	0	0	0
OBSL1	0	0	0	0	0	1	0	1	0
OOSP2	0	1	0	0	0	1	0	0	0
OR10J3	0	0	0	0	0	1	0	0	0
OR1D5	1	0	1	0	0	0	0	0	0
OR2F1	0	0	0	0	1	1	1	1	1
OR4D11	1	0	0	1	0	1	1	1	1
OR4D9	0	1	0	1	0	0	0	0	0
OR4F6	0	0	0	1	0	0	0	0	1
OR52N5	1	0	1	1	0	0	1	1	1
OR5G5P	0	1	0	1	0	0	0	0	0
OR6C6	1	0	1	0	0	0	0	0	1
OR8G1	0	1	1	1	0	0	0	0	0
OR8I2	0	1	0	1	0	0	0	0	0
OR8K5	1	0	0	1	0	0	1	0	0
OTOP3	0	1	1	0	1	0	1	1	0
OTUD7A	0	0	0	0	0	1	0	0	0
PAF1	0	0	0	1	1	1	1	1	0
PANK4	1	1	1	0	1	0	1	1	1
PAPLN	0	1	0	0	1	0	0	0	0
PAPOLG	0	1	0	0	0	0	0	0	0
PARP8	0	1	1	1	1	0	1	0	0
PAX4	0	1	1	1	1	0	1	0	0
PBOV1	0	1	0	1	0	1	0	1	0
PCDHA5	0	0	0	0	0	1	0	1	1
PCDHA7	0	1	1	1	1	0	1	0	0
PCDHB3	0	0	0	1	0	1	0	1	0
PCDHGA12	0	0	0	1	0	0	0	1	0
PCMTD1	0	1	0	1	1	0	0	0	0
PCNA	1	0	0	0	0	1	1	1	1
PCP4L1	0	0	0	1	1	0	1	0	0
PDE10A	1	1	1	1	1	0	1	1	0
PDGFB	0	0	0	0	1	0	1	1	0
PDLIM2	0	0	0	1	0	0	0	1	0
PFDN1	0	0	0	0	0	0	1	1	0
PGC	0	0	0	0	1	0	0	1	0
PHF1	0	0	0	1	0	0	1	1	1
PHLDA2	0	0	0	1	0	0	0	0	1
PLA2G5	0	0	0	1	0	0	0	0	0
PLEK2	0	0	0	0	0	0	1	0	0
PLEKHD1	0	0	0	0	1	0	0	0	0
PLEKHM2	0	0	0	0	0	1	0	0	0
PLK2	0	0	0	0	1	0	0	0	0
PLK3	0	0	0	0	0	1	1	1	1
PLXNA4	1	0	1	1	1	0	1	1	1
PMAIP1	0	0	0	1	0	0	0	1	1
PMP2	1	0	0	0	0	0	0	0	0
PNLIPRP1	0	0	0	0	0	1	0	0	0
PNMA2	0	0	0	0	0	1	0	0	0
PNRC1	0	1	0	0	0	0	1	0	0
POC5	1	0	0	0	1	1	0	0	1
POFUT2	0	1	0	1	0	0	0	0	0
POM121L8P	0	0	0	0	0	1	0	1	0
POTEC	0	1	1	0	0	0	1	1	1
POTEE	1	0	1	0	0	1	1	0	1
POU5F1P3	1	1	0	0	1	1	0	0	1
PPCS	1	1	0	1	0	0	1	0	0
PPP1R10	1	0	1	1	0	1	1	1	1
PPP2R1A	1	0	0	0	0	1	0	0	0
PPP4C	0	0	0	0	0	1	0	0	0
PPTC7	1	0	0	0	1	0	1	0	0
PQLC2L	0	1	0	0	1	0	0	1	0
PRAC1	1	1	0	0	1	1	0	0	0
PRAP1	0	0	0	0	0	0	1	1	1
PRKAG1	0	0	1	0	0	1	1	0	0
PRKCSH	0	0	1	0	0	0	0	0	0
PRMT9	1	0	0	0	0	0	1	1	0
PROCR	0	0	0	0	0	1	0	0	0
PRR22	0	0	0	0	0	1	1	1	1
PRR7	0	0	0	0	0	0	0	1	0
PRSS45	0	1	0	1	0	1	0	0	0
PSMB11	0	0	0	0	0	0	1	0	0
PTAFR	0	0	0	1	0	1	0	0	1
PTCH2	0	0	0	1	1	0	1	1	1
PTCHD4	0	0	0	0	0	1	0	0	1
PTK6	0	0	0	1	0	0	0	0	0
PTPN21	0	1	0	0	0	0	0	0	0
PTPRE	1	0	1	1	1	1	0	1	1
PUS10	0	1	1	1	0	0	1	0	0
PWWP2A	1	0	1	0	0	0	0	0	0
RAB1A	0	0	0	0	0	0	0	1	0
RAD21	1	1	0	0	0	1	0	0	0
RAVER1	0	0	1	0	0	1	1	1	1
RBM24	0	1	1	0	0	1	0	0	1
RBP3	0	1	0	1	1	0	0	0	0
RCOR3	1	1	1	0	0	0	1	0	0
RDH8	0	0	0	1	0	0	0	0	0
RELA	0	0	0	1	0	1	1	1	0
RFXAP	1	1	1	0	0	1	1	0	0
RHOB	1	0	0	0	0	1	0	1	1
RHOBTB3	0	0	0	0	0	0	0	0	1
RHOG	0	0	0	0	0	1	1	0	0
RHOQ	0	1	0	1	0	0	0	0	0
RING1	0	0	0	1	0	0	1	0	0
RND1	0	0	0	1	1	0	1	0	1
RNF144B	0	1	0	1	1	0	0	0	0
RNF40	0	0	0	1	1	1	1	1	1
RPS27L	0	0	0	0	0	1	0	1	1
RRP9	0	0	0	1	0	0	0	1	0
RSBN1L	0	1	0	0	0	0	0	0	0
RUFY4	0	0	0	0	1	0	0	0	0
RXFP2	0	0	0	1	1	0	1	1	1
RYR2	1	1	1	1	1	1	1	1	1
S100G	0	1	0	1	1	0	0	0	0
S100PBP	1	0	1	0	0	1	0	1	0
SAA3P	0	0	1	1	0	0	0	0	0
SAP30L	0	1	0	0	1	0	0	0	0
SATL1	1	0	0	0	0	1	0	1	0
SCG5	1	0	0	0	0	0	0	1	0
SCGB1D2	1	0	0	0	0	0	1	0	0
SCNN1G	0	1	0	1	0	0	0	0	0
SCYL3	0	1	1	1	1	0	1	0	0
SDR9C7	0	0	1	0	0	0	0	0	0
SEH1L	1	0	0	0	0	1	1	0	1
SERPINB8	0	0	0	1	0	0	0	0	1
SERTAD1	0	0	0	1	0	1	1	1	1
SETD1B	0	1	0	0	1	1	0	0	0
SETD2	1	0	0	0	0	0	0	0	0
SGK1	1	0	1	1	0	0	0	0	0
SGMS2	1	0	0	0	0	0	0	0	0
SH2B2	0	0	1	0	1	0	0	0	0
SH2D7	1	1	0	0	0	1	1	0	1
SH3GL1	1	0	1	1	1	1	0	1	1
SHANK2-AS3	0	0	0	0	0	1	0	0	1
SLAMF9	0	0	0	1	1	0	1	0	0
SLC16A4	0	1	0	0	0	0	0	0	0
SLC17A1	0	0	0	0	0	1	1	1	1
SLC22A10	1	1	0	1	0	0	0	0	0
SLC25A25	1	0	0	1	0	0	0	1	0
SLC25A32	0	0	1	0	1	0	1	1	0
SLC25A51	0	0	0	0	0	1	1	1	1
SLC26A10	0	1	0	0	0	1	0	1	1
SLC29A4	0	0	0	0	1	0	0	0	0
SLC38A8	0	0	0	0	0	0	0	1	0
SLC3A2	0	0	0	0	0	1	0	1	0
SLC51B	0	1	1	1	1	0	1	1	0
SLIT1	1	0	0	0	0	0	1	0	0
SMAD4	1	0	0	0	1	0	0	0	0
SNAPC2	0	1	0	0	0	1	1	1	1
SNX18	0	0	0	0	0	0	1	0	1
SPATA24	1	0	0	0	0	1	0	0	0
SPATA31C1	0	0	0	0	1	0	0	0	0
SPDYC	0	1	0	1	1	0	1	0	0
SPHK1	0	0	1	1	0	0	1	0	1
SPRR1A	0	0	1	0	0	1	1	0	0
SPRR2G	1	0	1	0	0	1	1	1	1
SPRY2	0	0	0	0	0	1	0	0	1
SRA1	0	0	1	1	1	1	1	1	1
SRF	0	0	0	0	0	0	0	1	0
SSSCA1	0	0	0	0	0	1	0	1	1
ST6GAL2	1	0	0	0	0	0	0	0	1
STAG2	0	0	0	0	0	0	1	0	0
STPG1	0	0	0	0	1	0	1	0	1
STX5	0	0	1	1	0	1	0	1	0
SYCP3	1	0	0	1	0	0	0	0	0
TAAR5	0	0	0	0	1	0	0	0	0
TAAR6	0	1	0	0	1	0	0	0	0
TAAR9	0	0	1	1	0	0	0	0	0
TAF1	0	0	1	0	1	0	0	1	1
TBC1D17	1	0	1	0	0	0	0	0	1
TBCEL	1	0	0	0	0	0	0	0	0
TBX18	0	0	0	1	0	0	0	0	0
TBX2	0	1	1	1	1	0	0	0	0
TCHHL1	0	0	0	0	0	1	0	0	0
TDH	0	0	0	0	0	1	0	0	1
TEKT4	0	0	0	1	1	0	0	0	0
TGFB3	0	1	1	1	0	0	0	0	0
TGFBR2	1	0	0	0	1	0	1	0	1
TGM3	0	0	1	1	1	1	1	1	1
THAP9	1	0	0	0	0	1	1	1	1
THEMIS2	0	0	0	1	1	0	0	0	1
TIGD3	0	0	0	0	1	0	0	0	1
TIGD4	0	1	0	1	1	0	1	0	1
TLCD1	1	0	0	1	0	1	1	0	0
TLX3	1	1	0	1	0	0	0	0	1
TM2D2	0	0	0	0	0	0	1	1	0
TNFRSF10D	0	0	0	0	0	1	0	0	0
TNFRSF12A	0	0	0	0	0	0	0	1	0
TNFSF9	0	0	0	0	0	1	1	0	1
TOB2	0	0	0	0	0	0	0	0	1
TOM1	0	0	0	1	0	0	0	1	0
TOPORS	0	1	0	1	0	0	1	0	0
TOX4	0	0	0	0	0	0	1	1	1
TPD52L2	0	0	1	0	0	1	1	0	0
TPM3	0	0	0	0	0	0	0	1	0
TPM4	0	0	0	0	0	0	0	0	1
TRAF4	0	0	0	0	1	1	0	0	0
TREM1	0	0	0	0	0	0	0	1	0
TRIAP1	1	0	0	0	0	1	0	1	1
TRIB1	1	0	1	1	0	1	1	1	1
TRIB3	0	0	0	1	1	0	1	1	1
TRIM23	1	0	1	0	0	1	0	0	0
TRIM28	0	0	0	0	0	0	0	1	1
TRIM3	0	0	0	0	0	0	0	1	0
TRIM42	1	0	0	0	0	0	0	0	0
TRIP11	1	0	1	0	0	0	0	0	0
TRMT6	1	0	1	0	1	0	0	0	0
TRPV5	0	0	0	0	0	1	1	0	0
TSG101	1	0	0	0	0	1	0	1	1
TSLP	0	0	1	1	0	0	0	1	0
TTBK1	0	0	0	0	0	0	0	1	0
TTC3P1	1	0	0	0	0	0	0	0	0
TTTY6B	0	0	0	0	1	0	1	0	0
TUBB2A	0	0	0	0	0	0	1	0	0
TUBB4B	0	0	0	0	0	0	0	1	0
TXN2	0	0	1	1	0	1	0	0	1
UBAP1	0	0	0	1	0	0	0	1	1
UBE2M	0	0	0	1	0	0	1	0	0
UBN2	1	1	0	0	1	0	0	0	0
UCP3	1	1	0	0	0	1	0	0	1
UHRF1	1	0	0	0	0	0	0	0	1
UNC13A	0	0	0	0	0	0	0	1	0
UPK2	1	0	0	1	0	0	0	1	0
VASP	0	0	1	1	0	0	0	1	1
VGLL3	0	1	0	1	0	1	0	0	1
VN1R10P	0	0	1	0	0	0	0	0	0
VPS26A	0	0	0	0	0	1	0	0	0
WAC	0	1	1	0	1	0	0	0	0
WDR1	1	0	0	0	1	0	0	1	0
WDR78	1	0	1	0	0	0	0	0	0
WDR87	0	0	0	1	0	0	0	0	0
WFDC1	0	0	0	0	1	0	0	0	0
WFDC9	1	0	0	0	1	1	1	0	1
WNT11	0	1	0	0	0	0	1	1	0
WNT8A	1	0	1	0	0	1	1	1	1
YEATS2	1	1	0	0	0	0	0	0	0
YKT6	0	0	0	1	0	0	0	0	1
YOD1	0	1	0	0	0	0	0	0	0
YTHDC2	0	0	0	0	0	0	1	0	0
ZBTB12	1	1	1	1	0	0	1	1	1
ZBTB14	1	0	1	0	1	1	0	1	1
ZBTB34	0	1	0	1	1	0	1	0	0
ZCCHC16	0	0	0	1	0	1	0	1	0
ZFP36L2	1	0	1	0	1	1	0	1	0
ZFPL1	0	0	0	1	0	0	1	0	0
ZMYM3	0	0	0	0	0	0	1	0	0
ZNF137P	1	0	1	0	1	0	0	0	0
ZNF217	1	1	0	0	1	0	1	0	0
ZNF23	1	1	0	0	1	1	1	1	1
ZNF233	0	0	0	1	1	0	0	0	0
ZNF280B	1	0	0	0	0	1	1	1	0
ZNF281	1	1	0	0	1	0	1	0	0
ZNF33A	0	0	0	0	1	0	0	0	0
ZNF394	0	0	0	1	0	0	0	0	0
ZNF398	1	0	1	0	1	1	0	0	1
ZNF624	1	0	0	0	0	0	1	0	1
ZNF677	0	0	1	1	0	1	0	0	1
ZNF732	0	0	0	1	0	1	0	1	1
ZNF746	0	1	1	1	1	0	1	0	0
ZNF75D	1	1	1	0	1	0	1	0	0
ZNF776	0	1	0	0	1	0	1	0	0
ZNF790	1	1	0	0	0	1	1	0	1
ZNF833P	1	1	0	0	1	0	0	0	0
ZSCAN23	1	0	0	0	0	1	0	0	1
ZSCAN5B	0	0	1	0	0	0	0	0	1
ZYX	0	0	0	0	0	1	0	1	0
AAAS	0	0	0	1	0	0	0	0	0
ABCA4	1	1	1	0	0	1	0	1	0
ADCYAP1R1	0	1	0	1	0	0	1	0	0
ADGRD2	0	0	0	0	1	0	0	1	0
AGTR2	0	1	1	0	0	0	1	0	1
AKNAD1	0	1	0	1	0	0	0	0	1
ANKRD29	1	1	1	0	0	1	0	0	0
ANKRD30BP2	0	0	0	0	0	0	0	0	1
ANKRD34B	0	1	0	0	0	0	0	0	0
ANO1	1	0	0	0	0	1	1	0	1
ANXA13	0	0	0	0	1	0	0	0	1
APC2	0	1	0	1	0	0	0	1	0
ARHGAP28	0	0	0	0	0	1	0	0	0
ARHGEF37	0	0	0	0	1	0	0	0	0
ARSF	0	0	0	1	0	0	0	0	0
ATP4A	0	0	0	0	0	0	1	0	0
ATP4B	0	0	0	1	0	1	1	0	0
BMPER	0	0	1	1	1	0	0	0	0
BPIFA3	0	1	1	1	1	0	1	0	0
C16orf59	0	1	1	1	0	0	0	1	1
C16orf86	0	0	0	1	0	0	0	0	0
C1orf229	0	0	1	1	0	0	0	0	0
C1orf94	0	1	0	1	0	0	0	0	0
C2orf73	0	0	0	0	0	1	1	0	0
C3orf67	0	0	0	1	1	0	1	0	0
CACNA1C	0	1	1	1	1	0	0	0	1
CAGE1	0	0	0	0	0	1	0	0	1
CALML6	0	1	0	0	0	0	0	0	0
CATIP	1	1	1	1	1	1	1	1	1
CCDC28A	0	1	0	1	0	0	1	0	1
CD14	1	0	0	0	0	0	0	0	0
CDH6	0	0	0	0	0	0	0	1	1
CDK9	1	0	0	0	1	1	1	1	1
CEMP1	0	0	1	1	0	1	1	0	1
CERS1	0	0	1	0	1	0	0	0	0
CHRNB2	0	0	1	1	1	0	0	1	1
CHST6	0	1	0	1	1	0	1	0	0
CKM	0	0	0	1	1	0	0	0	1
CKMT1A	0	1	0	1	0	0	0	0	0
CLMP	0	0	1	0	1	1	1	1	0
CNBD1	0	0	0	1	0	0	1	1	0
COL15A1	0	0	0	0	0	1	0	1	1
CORO6	1	0	0	0	0	0	0	0	0
CPN2	0	1	0	1	0	0	0	1	1
CPNE6	0	1	0	0	0	0	0	0	1
CPNE7	0	1	1	1	1	0	1	1	0
CRISPLD1	0	0	0	0	0	0	0	0	1
CTNND2	0	1	0	0	0	0	0	0	0
CTSE	0	0	0	1	0	0	0	0	0
CYP1A2	0	0	0	1	1	0	1	1	1
CYP3A7-CYP3A51P	0	1	0	0	0	0	0	0	0
DCLK3	1	0	0	1	0	0	0	0	0
DEFB116	0	0	1	0	1	0	0	0	1
DLGAP3	0	0	0	0	0	0	0	1	1
DLK2	0	1	0	1	1	0	1	0	0
DNAJA1P5	1	0	0	0	0	1	1	0	1
DOHH	0	0	0	0	1	0	1	0	0
DPY19L2P2	0	0	0	0	1	0	0	0	0
DRD5P2	0	0	0	0	0	0	0	0	1
DSCAM	0	1	0	1	0	0	0	0	0
DTYMK	0	0	0	0	0	1	0	0	1
DYNAP	0	0	0	0	0	0	0	0	1
EGR3	0	0	0	0	0	0	1	1	0
ENTPD3	0	1	0	1	0	1	0	0	0
EPHA3	0	1	1	1	0	0	0	0	1
ERVW-1	0	1	1	1	0	1	0	0	1
FAM153C	0	1	0	0	0	0	0	1	1
FAM163A	0	0	0	1	1	1	1	0	0
FAM174B	0	1	0	0	1	0	1	0	0
FAM188B	0	0	0	0	1	0	1	0	0
FAM215A	0	0	1	0	0	0	0	0	0
FAM216B	0	1	1	1	0	1	0	0	0
FAM47A	1	1	0	1	1	0	0	1	0
FBXL20	0	0	0	0	0	1	0	0	1
FCN3	0	0	1	0	1	1	0	1	1
FITM1	0	0	0	1	0	1	0	1	1
FMR1-AS1	0	1	0	1	0	0	0	0	0
FNDC9	0	0	0	1	0	1	1	1	1
FOXD4L3	0	1	1	1	1	0	1	1	1
FOXL1	0	1	1	1	1	0	1	1	1
FOXP2	0	0	0	0	0	0	1	0	0
FRS3	0	0	0	0	0	1	0	0	1
GABBR2	0	1	0	1	0	0	0	1	1
GABRA5	0	1	0	1	0	0	0	0	0
GALR3	0	1	0	1	1	0	1	0	1
GDAP1L1	0	0	0	1	0	0	0	0	0
GFRA4	0	0	1	1	0	0	0	1	0
GHSR	0	1	1	1	0	0	0	1	1
GIN1	1	0	0	0	0	1	0	0	0
GIPR	0	0	0	0	1	1	0	1	0
GLI1	0	1	0	1	0	0	0	0	0
GLRA4	0	1	0	0	0	0	0	0	0
GPR137	0	1	0	0	1	0	1	0	1
GPR149	0	1	0	0	0	0	0	0	0
GPR39	0	1	0	0	1	0	0	0	1
GRK4	0	1	0	1	0	1	0	0	1
GUCY2D	0	0	0	1	0	0	0	0	0
HAND2-AS1	0	0	0	0	0	0	1	1	1
HIC2	1	0	0	0	0	1	0	1	0
HIST1H2BB	1	0	0	0	0	1	0	1	0
HIST1H2BE	0	1	0	0	1	0	0	0	0
HMGN2P46	0	1	1	1	0	0	1	0	0
HPR	0	0	0	0	0	0	0	0	1
HSFX1	0	1	1	0	1	1	1	1	1
HTR3C	0	1	1	0	1	0	1	0	0
ICA1L	1	0	0	0	0	1	1	0	0
IL17RC	0	1	0	1	1	0	0	1	1
IL6	0	0	0	1	1	1	1	1	1
INSL5	0	1	0	0	0	1	0	0	0
INTS5	0	1	0	0	1	1	0	1	1
IQCF2	0	0	0	0	1	0	0	0	0
ITGA11	0	1	0	1	1	0	1	1	0
JPH4	0	1	1	0	1	0	0	0	0
KCNIP4	0	0	0	1	0	0	0	0	0
KCNK18	0	0	0	0	0	0	0	1	0
KCTD17	0	0	0	1	0	0	0	0	0
KDM4D	0	1	0	1	0	0	0	0	0
KIF18A	1	1	0	0	0	0	1	1	1
KLF3	1	1	0	0	1	1	1	1	1
KLK4	0	1	0	1	0	0	0	0	0
KRT26	0	1	0	1	0	1	0	0	1
KRT40	0	1	1	1	0	1	0	0	1
KRTAP10-1	0	0	0	0	1	0	0	0	0
KRTAP10-12	0	0	1	1	1	1	0	1	1
KRTAP5-3	0	1	1	1	1	1	1	0	1
KRTAP9-4	1	0	0	1	0	0	0	0	0
LAMB4	0	1	0	1	1	0	1	1	1
LCE2C	0	0	0	0	0	0	0	0	1
LCE3B	0	1	0	1	0	0	0	0	0
LCN15	0	0	0	0	0	0	1	0	0
LGR4	0	0	0	1	1	0	1	0	0
LHX1	0	1	0	1	1	0	0	1	0
LIN28B	0	1	0	1	0	0	0	0	0
LINC01198	0	0	0	1	0	0	0	0	0
LIPE	0	0	1	0	0	1	0	1	1
LIPJ	0	0	1	0	1	1	1	1	0
LOC100287010	0	1	0	0	1	0	1	1	0
LOC100287931	1	0	0	0	0	0	0	0	0
LOC100506766	0	1	0	1	0	0	0	0	0
LOC105379783	0	0	1	0	1	1	0	0	1
LOC284912	0	0	0	1	0	0	0	0	0
LPAR3	0	0	0	0	1	1	1	1	0
LRIT1	1	0	0	0	1	1	1	1	1
LRRC32	0	0	0	1	0	0	0	1	0
LRRC43	0	1	1	1	0	0	0	1	0
LRRTM1	0	1	0	0	0	0	0	1	0
LTA	0	0	0	0	0	1	0	1	0
MAATS1	0	0	0	1	0	1	0	0	0
MEIOB	0	0	0	0	0	1	0	0	0
MINK1	0	0	0	0	1	0	0	0	0
MIP	0	0	0	1	0	0	0	0	0
MOGAT1	0	0	1	1	1	1	1	0	1
MUC4	0	1	0	1	0	1	0	1	1
MURC	0	0	0	0	1	0	1	0	1
MYL3	0	1	0	1	0	1	0	0	0
MYO1C	0	0	0	0	0	1	0	1	1
NID2	0	1	0	0	0	0	0	0	0
NLGN1	1	0	0	0	0	1	0	1	1
NOL4	0	1	1	1	1	1	1	0	1
NRG3	0	1	0	1	0	0	0	0	0
NUPR1	1	0	1	0	0	1	1	1	1
ODF3L1	1	0	1	1	1	1	1	1	1
OMP	0	0	1	1	1	1	0	0	0
OR10G7	0	0	1	1	1	0	1	0	0
OR11L1	0	1	0	1	0	1	1	0	1
OR13G1	0	0	0	1	0	0	1	0	0
OR2B6	0	1	1	0	0	0	0	0	0
OR4X2	0	1	0	1	0	0	1	1	0
OR52E2	0	1	0	0	0	0	0	0	0
OR5B17	0	1	0	1	1	1	1	0	1
OR5W2	0	0	0	0	0	0	0	1	0
OR6A2	0	0	0	1	0	1	0	0	0
OR6C2	0	1	1	0	0	0	0	0	0
OR6Y1	0	1	0	1	0	0	1	0	0
OR8J3	1	1	0	0	0	0	0	0	0
OR9Q1	0	0	0	0	0	1	0	0	1
PACSIN3	0	1	0	0	0	0	1	0	0
PAQR9	0	0	1	1	1	0	0	0	0
PDZD9	0	0	0	1	1	0	1	0	0
PIEZO2	0	0	0	1	0	0	0	0	0
PIGQ	0	1	1	1	1	0	1	1	0
PIK3C2G	0	0	0	1	0	0	0	0	0
PLA2G4D	0	0	0	0	0	0	1	0	0
PLEKHS1	0	0	0	0	1	0	1	0	0
PLPP4	1	0	0	0	0	0	0	0	1
PLXNA3	1	0	1	1	0	0	1	0	0
PM20D1	1	0	0	0	1	1	0	1	1
POU3F4	1	0	0	0	0	0	0	0	1
PRR21	0	0	0	1	1	0	0	0	0
PRRG2	0	0	1	0	0	0	0	0	0
PRSS22	0	0	1	1	0	0	0	0	0
PRSS27	0	0	0	0	0	1	0	0	0
PRSS53	0	0	0	0	1	1	1	1	0
PSMC3IP	1	1	0	0	1	0	0	0	0
PTDSS2	0	0	0	0	1	0	0	0	0
PTGES2	0	0	0	1	0	1	1	0	1
RASGEF1C	0	0	0	0	0	0	1	1	1
RBM20	0	1	1	1	0	1	0	1	1
RECQL4	0	0	0	1	1	0	1	1	0
RGMA	1	0	0	0	0	1	0	1	0
RNASE11	0	1	1	1	0	0	0	0	1
RNF17	0	0	0	0	1	0	0	0	0
RTP2	0	0	0	1	1	0	1	0	0
RXFP4	1	1	0	0	1	0	1	0	0
SAMD1	0	1	0	0	0	0	0	0	0
SAMD7	0	1	0	1	0	0	0	0	0
SBSN	0	0	1	1	0	0	0	0	0
SCML2	1	0	1	0	1	0	1	1	0
SCN7A	0	0	0	1	0	1	0	1	0
SGCZ	0	1	0	0	0	0	0	0	0
SGSM3	0	0	1	1	1	0	1	1	0
SHC4	0	0	1	0	0	0	0	0	1
SIX2	0	0	0	1	0	0	0	0	0
SLC12A3	0	1	0	0	1	0	1	0	1
SLC16A11	0	1	0	1	1	0	0	1	1
SLC22A9	0	0	1	1	0	1	0	1	0
SLC27A4	0	1	0	0	0	0	0	0	0
SLC36A3	0	1	0	0	1	1	0	0	1
SLC3A1	1	1	0	1	0	0	0	0	0
SNORA60	1	0	0	0	0	0	0	0	0
SNX32	0	0	0	1	0	0	0	0	0
SOWAHB	1	0	0	0	0	0	0	0	1
SOX21	0	0	0	1	0	0	0	0	0
SPACA5	0	0	0	1	0	0	0	0	0
SPANXN5	0	0	0	0	1	1	1	1	1
SPRR3	1	0	0	0	0	0	0	0	0
STK31	0	0	0	0	0	1	0	0	0
STOML3	0	0	0	0	0	0	0	1	1
STXBP1	0	0	1	0	0	0	1	1	1
STXBP6	0	1	0	1	0	0	1	0	0
SUV39H2	1	1	0	0	0	1	0	0	0
SYT13	0	0	0	0	1	1	1	0	1
TACC2	0	0	0	0	0	0	0	0	1
TAS1R1	0	1	0	0	1	0	0	1	1
TAS2R60	1	1	1	1	1	1	0	1	1
TCAP	0	0	1	1	0	0	1	1	0
TCEAL6	0	1	0	0	0	0	1	0	0
TEDDM1	0	1	1	1	1	1	0	1	1
TEKT5	0	1	0	0	0	0	1	0	0
TEX14	0	0	0	0	0	0	1	0	0
TFAP2D	1	0	0	0	0	1	1	1	1
THAP8	0	0	0	0	0	0	0	0	1
THEM5	0	1	1	0	1	0	1	0	0
TMCC1	0	0	0	0	0	0	1	0	0
TMEM105	0	0	0	0	0	0	1	0	0
TMEM132E	0	1	0	1	1	0	1	1	0
TMEM253	0	1	1	1	0	0	1	0	1
TMEM53	0	1	0	1	0	0	0	0	0
TMEM74	0	1	1	1	1	0	0	0	0
TMEM8C	1	0	0	0	0	0	0	0	0
TMPRSS11B	1	1	1	1	0	0	1	0	1
TP53AIP1	1	0	1	1	0	1	1	1	1
TREM2	0	1	0	0	0	0	1	1	1
TRIM53AP	0	0	0	0	0	0	0	1	0
TTLL3	1	1	0	0	1	1	1	0	1
TTTY11	0	0	0	0	0	0	1	0	0
UBALD1	0	0	0	0	1	0	1	0	1
USP17L1	0	0	0	1	1	0	0	1	1
USP5	0	1	0	0	0	1	0	0	1
VAMP1	1	0	0	0	0	0	0	0	0
WDHD1	0	0	0	0	0	0	1	0	0
XRCC6P5	0	0	0	0	1	1	0	1	1
YRDC	0	0	1	1	0	1	0	1	1
ZBTB18	0	0	0	0	0	0	0	1	0
ZDHHC15	0	1	0	0	0	1	1	0	0
ZDHHC24	0	1	1	0	0	0	1	0	0
ZNF133	1	1	0	0	1	1	1	0	0
ZNF229	0	0	0	1	0	0	0	1	1
ZNF534	1	0	0	1	0	0	0	0	0
ZNF695	0	1	0	1	0	0	0	1	0
ZNF883	0	0	0	0	0	1	0	0	0
ZPBP2	1	0	1	1	1	1	1	1	1
ZPLD1	1	1	1	0	1	0	0	1	0
ZYG11A	0	1	1	1	0	1	1	0	1
A4GALT	0	1	0	1	1	0	1	1	1
AADAT	0	1	0	1	0	0	1	0	0
ACER1	0	1	0	1	0	0	0	1	0
ACTG1	0	0	1	0	1	0	1	0	1
ACTN2	0	0	0	0	1	0	0	1	0
ADAMTS1	0	0	1	0	0	1	0	0	1
ADH6	1	0	0	0	0	0	0	0	0
AGGF1	0	1	0	0	0	0	0	0	0
AGO1	1	1	0	0	1	1	1	0	1
AGR3	1	0	0	0	0	0	0	0	0
AGTR1	0	0	0	0	1	0	1	1	0
AHR	0	0	0	1	0	0	1	1	0
AKAP10	0	0	0	1	1	0	0	0	0
AKIRIN1	1	0	1	0	1	1	0	0	0
ALDH1A3	0	1	0	1	1	0	1	0	0
ALPI	0	1	1	1	1	1	1	1	1
AMIGO3	0	1	0	0	0	0	1	1	1
AMMECR1L	1	0	0	0	1	1	1	1	0
AMN	0	0	0	1	0	0	0	0	0
ANKRD30B	0	0	0	0	0	1	0	1	1
AP4E1	0	0	0	0	0	1	0	0	0
APCDD1	1	0	0	1	0	0	0	0	0
APELA	0	1	0	0	0	1	0	0	0
ARFGAP3	0	0	0	1	0	1	1	0	1
ARHGEF39	1	0	0	0	1	1	0	1	1
ARID1A	1	1	1	0	0	1	0	0	0
ARID4A	0	1	0	0	0	0	0	0	0
ARL4A	0	1	0	0	0	1	1	0	0
ARL4D	0	0	0	0	1	1	1	1	1
ARMCX4	0	0	0	0	1	0	0	0	0
ARPP21	0	1	0	0	0	0	1	1	0
ASB12	0	0	0	0	1	0	0	0	0
ASB3	1	0	0	0	0	0	0	0	0
ASB8	1	1	0	0	0	0	0	0	0
ASCC3	0	1	0	0	0	0	1	1	0
ASTN1	0	1	0	0	0	0	0	1	0
ATCAY	0	1	1	1	0	0	1	1	1
ATG101	0	0	0	1	0	0	1	0	0
ATG4D	0	0	0	0	0	0	0	0	1
ATXN7L3	0	0	0	0	0	0	0	1	0
BAG6	0	0	0	0	0	0	1	1	0
BAZ2A	1	1	1	1	1	0	0	0	0
BBC3	1	0	0	0	0	0	0	1	1
BFSP2	0	0	0	0	0	0	0	1	0
BRD3	1	1	0	0	0	0	0	0	0
BRWD3	0	1	1	0	0	0	0	1	1
BSND	0	1	1	0	1	0	1	1	1
BTG3	0	0	0	0	0	1	0	1	1
BTN2A2	0	0	0	1	1	0	1	1	0
C11orf24	0	1	0	0	0	0	0	1	0
C14orf79	0	0	0	1	0	0	0	0	0
C16orf71	0	0	0	0	0	0	0	1	0
C16orf92	0	0	0	1	0	1	0	1	0
C1QTNF4	0	0	1	1	1	1	0	1	1
C20orf195	0	0	0	0	0	0	1	0	0
C2orf66	0	0	0	1	1	0	1	1	1
C4orf17	0	1	0	0	1	0	1	0	1
C8orf58	0	0	0	0	1	0	0	1	0
C8orf74	0	1	0	1	0	1	1	0	0
CASP9	0	0	0	0	0	0	0	0	1
CCDC125	1	0	0	0	1	1	0	0	1
CCDC9	1	0	0	1	0	0	1	1	1
CCL1	0	1	0	1	0	0	1	1	1
CCT5	0	0	0	0	0	0	0	1	0
CD34	0	0	0	1	0	0	0	1	1
CD40	1	0	0	0	1	1	0	0	1
CD70	0	0	0	0	0	1	1	0	0
CDK20	0	0	0	0	0	0	0	1	0
CDK5R2	1	1	1	1	0	1	1	1	1
CDYL2	0	0	0	1	0	0	0	1	0
CEBPG	0	0	0	0	0	0	0	1	0
CELA2A	0	0	0	0	0	0	1	1	0
CENPA	0	1	0	0	0	0	0	0	0
CENPBD1	1	0	0	0	1	0	0	0	0
CES4A	0	0	0	0	0	1	0	0	0
CFAP61	1	1	0	0	1	0	1	0	0
CGB	0	0	0	1	1	0	1	1	1
CHCHD7	1	0	0	0	0	0	0	0	0
CHERP	0	0	0	0	1	0	0	0	0
CHST10	0	0	0	1	0	0	0	1	1
CHST4	0	1	0	1	1	1	1	1	1
CLCA2	0	0	0	0	0	0	1	1	0
CNNM2	0	1	0	1	1	0	1	0	0
CNTNAP1	0	0	0	0	1	0	0	0	0
COL20A1	0	0	0	0	1	0	0	0	0
CPEB1	0	0	0	0	1	0	0	0	0
CPO	1	1	1	0	1	1	0	0	1
CPZ	0	1	0	1	0	0	0	1	0
CSF2	1	1	1	1	0	1	0	0	1
CSF3	0	1	0	1	1	0	1	1	1
CSH1	0	0	0	1	0	1	0	0	0
CTAGE5	0	0	0	0	0	0	1	0	1
CTBP1-AS2	1	1	1	0	0	1	1	1	0
CTRB2	0	1	0	1	0	0	0	0	0
CXCL14	0	0	0	0	0	0	0	1	0
CYCS	1	0	0	0	0	0	0	1	0
CYP51A1	0	0	0	0	0	0	0	1	1
DBH	0	1	0	0	1	0	0	0	1
DCAF12L1	0	0	0	1	0	0	0	0	0
DCLRE1C	1	1	0	0	0	0	0	0	0
DCTN4	1	0	1	0	0	0	0	0	0
DDR1	0	1	0	0	1	0	0	0	0
DDX21	1	0	0	0	1	1	0	0	1
DDX25	0	0	0	0	1	1	0	1	1
DDX5	0	0	0	0	1	1	0	0	0
DHX32	1	0	0	0	0	0	0	0	0
DIO3	0	1	0	1	1	0	1	0	0
DMBT1	0	1	0	1	0	0	0	0	0
DNAJC2	1	0	0	0	0	1	0	0	0
DNASE2B	1	1	1	0	0	1	0	0	0
DNM1P46	1	1	1	0	0	0	0	1	1
DOCK1	0	1	0	1	1	0	0	0	0
DPH3	0	0	0	1	0	0	0	1	1
DUSP14	0	0	0	1	1	0	0	1	0
DUSP5	0	0	0	0	0	0	0	1	0
DUSP8	0	0	1	0	0	0	0	1	0
DUXA	1	1	1	0	0	0	1	0	0
DYRK1A	1	1	1	0	1	0	1	0	0
E2F4	0	0	0	1	0	0	0	1	0
EAF1	1	0	0	1	1	1	0	1	1
EAPP	0	1	0	0	0	0	1	0	0
EBI3	0	0	0	0	0	1	1	0	1
EFHC1	0	0	0	0	1	0	0	0	0
EFNA4	0	0	0	0	0	0	0	1	1
EI24	1	0	0	0	0	0	0	0	1
EIF1B	1	0	0	0	0	0	0	0	0
EIF2B2	1	0	0	1	0	0	0	1	0
EIF5AL1	1	0	0	1	1	0	0	0	1
ERCC6	1	0	0	0	1	0	0	1	1
ERRFI1	0	1	0	0	0	1	0	0	0
ERVK3-1	0	0	1	0	0	0	0	0	0
ETAA1	1	0	0	0	0	0	0	1	1
ETNPPL	1	1	0	0	1	1	1	0	0
FAM107A	0	1	0	1	1	0	0	1	0
FAM160B1	0	0	0	1	1	0	1	0	0
FAM3A	0	1	0	1	0	1	1	1	0
FAM47B	0	1	0	0	0	1	0	0	0
FAM63B	0	1	1	1	1	0	0	0	1
FAM78A	0	0	1	0	0	1	0	0	0
FAM92A1	1	1	0	0	0	1	0	0	0
FDXR	0	1	0	0	1	0	1	0	1
FLJ33534	0	0	1	0	0	1	0	0	0
FMO2	1	0	1	0	0	0	1	0	0
FOPNL	0	0	0	0	0	1	0	0	0
FZD10	0	1	0	1	1	0	0	1	0
GAFA3	1	0	0	0	0	1	0	0	1
GALNT11	1	1	0	0	1	0	1	0	1
GALNT4	0	1	0	0	0	0	0	1	1
GALNT7	0	1	0	0	0	0	0	0	0
GJB4	0	0	0	1	1	0	0	0	0
GLDN	0	0	0	1	0	0	0	0	0
GLIPR1L2	0	0	0	1	0	0	0	1	0
GLTSCR1L	0	1	0	0	1	0	1	0	0
GMFG	0	0	0	0	0	1	1	0	0
GNE	1	0	0	0	0	0	1	1	0
GNRHR	0	0	0	1	0	0	0	0	0
GPC1	0	1	1	1	1	0	1	1	0
GRIA2	0	0	0	1	0	0	1	0	0
GRWD1	0	0	0	0	1	0	0	0	0
GSTM2	0	1	0	1	0	0	1	0	0
GTF2B	0	0	0	1	1	0	0	1	0
GTF2E1	0	1	0	1	0	0	1	0	0
H1FOO	0	1	0	1	0	0	1	1	1
HAAO	0	1	0	1	0	0	1	0	1
HAMP	0	1	0	0	0	1	0	1	1
HAUS2	0	0	0	0	0	0	0	0	1
HES1	0	0	0	0	0	0	1	1	0
HIC1	0	1	0	1	0	1	1	1	0
HLA-L	1	0	0	0	1	0	1	0	0
HPS5	0	0	0	1	0	0	1	1	1
HSD17B13	0	1	0	0	0	0	1	0	1
HSPB9	0	0	0	0	0	1	1	1	1
IFNA21	1	0	1	1	0	0	0	0	0
IFT140	0	1	0	1	0	0	1	0	1
IL16	1	0	0	0	1	0	0	0	0
ING3	0	1	0	1	1	0	1	0	1
INPP1	0	0	0	1	1	0	1	1	1
IRF2BP1	0	0	0	1	0	1	1	1	1
ISL2	0	0	0	0	0	1	0	0	1
JPH2	0	1	0	1	0	0	0	0	0
JUND	0	0	0	1	0	1	0	0	0
KANK3	0	1	0	0	0	0	0	0	0
KCNT1	0	0	1	1	0	1	0	1	0
KCTD13	0	1	0	1	1	0	1	1	0
KCTD16	0	0	0	0	0	0	0	1	0
KERA	0	0	0	1	0	0	0	0	0
KIF14	1	0	0	0	0	0	0	0	0
KLC2	0	0	0	1	1	0	0	1	1
KLF15	0	0	1	0	1	1	0	1	1
KRT24	1	0	0	0	0	0	0	0	1
KRT36	1	0	0	1	0	0	1	0	0
KRT38	1	0	0	0	0	1	1	1	1
KRTAP21-3	1	1	0	0	1	0	1	0	1
LACC1	0	0	0	1	0	0	0	1	0
LAMTOR3	0	0	0	1	0	0	1	1	1
LCE1A	0	0	0	1	1	0	0	0	0
LECT2	0	1	1	0	1	1	0	0	0
LIN28A	1	1	0	0	0	1	1	0	1
LINC00652	0	1	0	0	0	0	0	0	0
LINC01547	0	1	1	1	0	0	1	1	0
LINGO3	1	0	0	0	0	0	0	0	0
LINGO4	0	1	0	1	0	0	0	0	0
LOC100130430	0	0	0	1	0	0	0	0	0
LOC100287896	1	0	0	0	0	0	0	0	0
LOC101927079	0	1	0	0	0	1	0	0	1
LOC102723502	0	0	1	1	1	0	1	0	1
LOC105376348	1	0	0	0	1	1	1	1	0
LOC105377403	0	0	0	1	1	0	1	1	0
LOC105379554	0	0	0	0	0	0	1	1	0
LOC339166	0	0	0	1	1	1	1	1	1
LOC403312	1	1	0	0	0	0	0	0	0
LOC439951	0	1	0	0	0	0	0	0	1
LOC643276	0	0	0	0	1	0	0	1	0
LRRC49	0	1	0	1	1	0	1	1	0
LYSMD4	0	1	0	1	1	0	1	0	0
LYZL1	0	0	0	0	1	0	0	1	0
LYZL4	0	1	0	0	0	1	0	0	0
MAFG	1	0	0	0	1	0	0	1	1
MAFK	0	0	0	1	0	1	1	1	1
MAGEB6	0	0	0	0	0	0	0	0	1
MAP3K14-AS1	1	0	0	0	1	1	0	1	1
MAPK8IP1	0	1	0	1	0	0	0	1	1
MATN1	0	0	0	0	0	1	0	0	0
MBNL1-AS1	0	0	0	0	0	1	1	1	1
MCM3AP-AS1	0	0	1	0	1	1	0	1	1
MDM2	1	0	0	0	0	1	1	0	1
MED19	1	0	0	0	0	1	0	0	1
MEPCE	1	0	0	1	0	1	1	1	1
MFSD2A	0	0	0	0	1	0	0	0	0
MFSD8	1	0	1	0	1	1	0	0	1
MIPOL1	0	0	0	0	0	0	1	0	0
MOK	0	0	0	1	0	0	1	0	1
MOSPD1	0	0	0	0	0	0	0	1	1
MRGPRE	0	0	0	0	1	0	1	1	0
MYBL2	0	1	0	1	1	0	1	1	1
MYBPC2	0	0	0	1	0	0	0	1	0
MYBPH	0	0	1	0	0	0	0	0	0
MYO1H	0	1	0	0	0	0	0	1	0
MYO5B	0	0	1	1	0	0	0	0	0
N4BP3	0	0	0	1	0	1	0	0	1
NANOS2	0	0	0	0	1	0	1	1	0
NDE1	0	0	1	0	1	0	0	0	0
NDRG4	1	1	1	1	0	0	0	0	1
NEK10	0	1	0	1	0	1	0	0	0
NEUROD4	0	0	0	1	0	0	0	1	0
NFKBIE	0	0	0	1	0	0	0	1	1
NGEF	0	0	0	1	1	0	1	0	0
NHSL2	0	1	0	0	0	0	0	0	0
NIN	0	0	1	0	1	0	1	0	0
NKX3-2	0	1	0	1	0	0	0	1	0
NOC2L	0	0	0	0	1	0	1	1	0
NOC4L	0	0	0	0	1	0	1	0	1
NOTCH3	0	1	0	1	1	0	1	1	0
NPR2	1	0	0	1	0	1	0	1	0
NPY2R	0	1	0	1	0	0	1	1	0
NRG2	0	1	0	0	1	0	1	1	0
NRROS	1	0	0	1	0	0	0	1	1
NWD2	1	1	1	0	1	0	1	0	1
NXT1	0	0	0	0	0	1	1	0	0
OR10G3	0	0	0	0	0	0	0	0	1
OR2L2	0	1	0	1	1	0	1	1	0
OR4C11	0	0	0	1	1	1	1	1	0
OR52A1	1	1	0	0	1	0	1	0	0
P2RX6	0	0	0	0	0	0	0	0	1
PABPC1L2A	0	1	0	0	1	0	1	1	1
PABPN1L	0	0	0	1	1	0	0	1	0
PAPPA	1	0	0	0	1	1	0	0	1
PCDH17	0	1	0	0	1	0	1	0	0
PDGFRL	0	1	0	0	1	0	1	1	0
PHF20	1	0	0	0	0	0	0	0	0
PHIP	0	1	0	0	0	0	0	0	1
PHLDA3	0	0	0	1	0	0	0	1	1
PKN3	0	0	0	1	0	1	0	0	0
PLA1A	0	1	0	0	0	0	0	1	0
PLAC4	0	0	0	1	1	1	1	1	0
PMPCA	0	0	1	0	0	1	1	0	0
PNPLA2	1	0	0	0	0	1	0	0	0
POLDIP3	0	0	0	1	0	0	0	1	1
POLI	1	0	1	0	1	0	1	0	0
POLR3D	0	0	0	1	0	0	0	1	1
POU4F3	0	0	0	1	0	0	0	1	0
PPME1	1	1	0	0	0	1	0	0	1
PPP1R12A	0	0	0	1	0	1	0	0	0
PPP1R15A	0	0	1	1	0	1	1	1	1
PPP1R3C	0	1	0	1	1	1	0	0	0
PPY	0	1	0	1	1	0	1	1	0
PRICKLE3	0	1	0	1	0	0	0	0	0
PRLHR	0	1	0	1	1	0	0	0	0
PRPF38A	0	0	0	0	0	0	0	1	0
PSMD8	0	0	0	0	0	1	0	1	0
PSPN	0	1	0	1	1	0	1	1	0
PTGER3	0	1	0	1	0	0	0	0	0
PTHLH	0	1	0	0	0	1	0	1	0
PUM2	0	0	1	0	0	0	0	0	0
PYGO2	0	0	0	1	0	1	0	0	1
RALGAPA2	0	0	1	0	0	0	0	0	1
RAPH1	0	0	0	0	1	0	0	1	0
RBM14	1	0	1	0	1	1	1	1	1
RBM41	0	0	0	0	0	1	0	0	1
RBM8A	1	0	1	0	0	1	0	1	1
RFX5	0	0	0	0	0	1	0	1	1
RNF128	0	0	0	1	0	0	0	1	0
ROS1	0	0	0	1	1	1	1	1	1
RPTN	0	0	0	1	1	1	0	1	0
S1PR4	0	1	1	0	0	1	1	0	1
SAC3D1	0	1	0	0	0	0	0	1	0
SCX	0	0	1	1	1	0	1	0	0
SELV	0	0	0	1	1	0	0	1	0
SEMA7A	0	0	0	1	0	0	0	1	0
SERPINA6	1	1	1	0	0	1	0	0	1
SETDB2	0	0	0	0	1	0	0	0	0
SLC12A8	0	1	1	1	1	0	1	1	0
SLC1A2	1	0	1	1	1	0	0	1	1
SLC22A7	0	1	0	1	1	0	1	1	0
SLC25A12	1	0	1	0	1	1	0	0	0
SLC25A21	0	0	0	0	0	0	0	1	0
SLC25A33	1	0	0	0	0	1	1	0	0
SLC25A4	0	0	0	0	0	0	0	1	0
SLC26A7	0	0	0	0	1	0	0	0	0
SLC34A3	0	1	1	1	0	0	1	1	1
SLC4A5	0	0	0	0	0	0	0	1	0
SLC50A1	0	1	0	0	0	1	1	1	0
SLC5A3	1	1	1	0	1	0	0	1	1
SLC5A5	0	1	0	1	0	0	0	0	0
SLC6A4	0	0	0	1	0	0	1	1	0
SLC6A5	0	0	0	0	0	0	0	1	0
SLC7A13	0	0	0	1	0	1	1	0	0
SLFN13	0	0	0	0	0	0	1	0	0
SNORA74B	0	0	0	0	0	0	1	0	0
SNRK	1	0	0	0	0	0	0	0	1
SOAT2	1	1	0	0	1	1	0	0	0
SOHLH1	0	0	0	1	1	0	1	1	0
SOX10	0	0	0	1	0	0	1	0	0
SPINK5	0	0	0	1	0	0	0	0	0
SPP2	1	1	0	0	0	0	0	0	0
SPTBN4	0	0	0	0	0	0	1	1	0
SPTLC3	0	0	0	0	1	0	0	0	1
SPTY2D1	0	0	0	1	1	1	1	1	1
SQLE	1	0	0	1	1	1	1	0	1
STARD13	1	1	1	0	0	0	1	0	1
STK32A	0	0	0	1	0	0	0	0	0
STRIP2	0	0	0	1	0	0	1	1	0
SUCO	0	0	0	1	0	0	0	0	1
SULT6B1	0	0	0	0	0	0	1	0	0
SUPT20HL1	0	0	0	0	0	0	1	0	0
SUPT6H	1	0	1	1	1	1	1	1	1
SWT1	0	0	0	0	0	0	0	0	1
SYNE2	0	0	0	0	1	0	1	0	0
SYS1	0	0	0	1	0	0	0	0	0
SZT2	0	0	0	0	0	0	0	0	1
TACR2	0	0	0	0	0	0	0	1	1
TACR3	0	1	0	1	0	0	1	0	0
TBC1D19	1	1	1	0	1	1	1	1	1
TBC1D24	0	0	1	0	0	0	0	0	0
TBX3	0	1	0	1	1	0	1	0	1
TCEANC2	1	1	0	0	0	1	0	0	0
TDGF1	0	1	1	1	0	0	0	1	0
TFB1M	1	0	1	0	0	0	0	0	1
TFDP3	1	1	0	0	0	1	1	0	1
TGOLN2	0	0	0	0	0	0	1	0	0
TH	0	1	0	1	1	0	1	1	1
TICAM1	0	0	0	0	0	0	0	0	1
TIGAR	0	0	0	0	0	0	1	1	1
TINF2	0	0	0	1	1	0	0	1	1
TKTL2	0	1	1	0	1	0	1	0	0
TMEM114	0	1	0	1	1	0	1	1	1
TMEM14EP	0	1	0	1	1	0	1	1	0
TMEM190	0	1	0	1	1	0	1	1	0
TMEM233	0	0	0	1	0	0	0	1	0
TMPRSS11F	0	1	0	0	1	1	1	0	0
TNF	1	0	0	1	0	0	0	1	1
TNMD	0	0	1	0	0	0	0	0	0
TNPO3	0	1	0	1	0	0	0	0	0
TOE1	1	0	0	0	0	1	1	1	0
TOMM40	0	0	0	0	0	0	1	0	0
TOPAZ1	0	0	0	1	0	1	1	1	0
TPRX1	1	0	0	0	0	0	0	1	0
TRIM17	0	0	0	1	1	0	0	0	0
TRIM33	1	0	0	0	1	0	0	1	0
TRIM8	0	0	0	1	0	0	1	0	0
TRMT2A	0	0	0	1	1	0	0	0	1
TRMT5	1	0	0	1	0	0	0	1	1
TTC30B	0	0	0	0	0	0	1	0	0
TTC39A	0	1	0	1	0	0	0	1	0
TTC41P	1	0	0	0	1	1	0	0	0
TUBA1C	0	0	0	1	1	0	1	1	0
TUBB7P	0	0	0	1	1	0	0	1	1
TVP23A	0	1	0	1	1	0	1	1	0
UBE2D4	0	0	0	1	0	0	0	0	1
UBE2S	0	1	0	0	0	0	1	0	1
ULBP2	0	0	0	1	1	0	0	1	0
USH1G	0	1	0	1	0	0	1	0	0
USP30	0	0	1	0	0	1	1	0	1
USP50	1	1	1	1	1	0	1	0	0
VAX1	0	0	0	1	0	0	0	0	0
VEGFA	0	0	0	0	1	0	0	0	0
VNN3	0	1	1	0	0	0	0	0	0
WDR66	0	0	1	0	0	0	0	0	1
WFDC5	0	0	0	1	0	0	0	1	0
XAGE1B	0	1	1	1	1	1	1	0	0
ZBTB21	0	0	0	0	0	0	1	1	0
ZBTB5	1	0	0	0	0	0	0	0	1
ZC3H12A	0	0	0	0	0	0	1	1	0
ZGRF1	1	0	0	0	1	0	0	0	0
ZKSCAN3	1	0	0	0	1	0	0	0	1
ZNF165	1	0	0	0	1	1	0	1	1
ZNF20	0	0	0	0	0	0	1	0	0
ZNF226	0	1	0	0	0	1	0	0	1
ZNF236	1	1	0	0	0	0	0	0	1
ZNF385C	0	1	0	0	0	0	0	0	0
ZNF474	0	0	0	0	0	0	1	0	0
ZNF546	1	0	1	0	0	1	0	0	1
ZNF564	0	0	0	0	0	0	1	0	0
ZNF593	0	0	1	1	0	1	1	1	1
ZNF594	1	0	0	0	1	1	0	1	0
ZNF697	0	0	0	1	0	0	0	1	0
ZNF736	1	1	1	0	0	0	1	0	1
ZNF737	1	0	1	0	1	1	0	1	0
ZNF763	1	1	1	0	1	1	0	0	0
ZNF782	0	1	0	0	0	1	0	0	0
ZNF844	0	1	0	0	1	0	0	0	0
ZSCAN16	0	1	0	1	0	0	1	0	0
