# Supplementary material for: A functional gene module identification algorithm in gene expression data based on genetic algorithm and gene ontology
Source: BMC Genomics. 2023 Feb 17;24:76. doi: 10.1186/s12864-023-09157-z (PMC9936134; doi:10.1186/s12864-023-09157-z)
Supplement: Supplementary file 3 — Additional file 3: Table S3. Query results of hub genes in DisGeNET database. A sheet corresponds to a hub gene. [file 12864_2023_9157_MOESM3_ESM.xlsx]

## Sheet: CD86
Table S3 Query results of hub genes in DisGeNET database
A sheet corresponds to a hub gene.
Gene	Gene_id	Disease	Disease_id	Type	Disease_Class	Semantic_Type	N_genes_d	N_SNPs_d	Score_gda	EL_gda	EI_gda	N_PMIDs	N_SNPs_gda	First_Ref	Last_Ref
CD86	942	Multiple Myeloma	C0026764	disease	Neoplasms; Immune System Diseases; Hemic and Lymphatic Diseases; Cardiovascular Diseases	Neoplastic Process	1740	865	0.34		1	5	0	1999	2019
CD86	942	Contact Dermatitis	C0011616	disease	Skin and Connective Tissue Diseases	Disease or Syndrome	110	3	0.3		1	1	0	2015	2015
CD86	942	Gastro-enteropancreatic neuroendocrine tumor	C2930967	disease	Digestive System Diseases; Neoplasms; Endocrine System Diseases	Neoplastic Process	41	4	0.3		1	1	0	2018	2018
CD86	942	Liver Dysfunction	C0086565	phenotype	Digestive System Diseases	Finding	73	0	0.3		1	1	0	2010	2010
CD86	942	Contact hypersensitivity	C0162351	phenotype	Skin and Connective Tissue Diseases	Pathologic Function	71	0	0.3		1	1	0	2015	2015
CD86	942	Liver diseases	C0023895	group	Digestive System Diseases	Disease or Syndrome	1019	100	0.3		1	1	0	2010	2010
CD86	942	Liver Cirrhosis, Experimental	C0023893	disease	Pathological Conditions, Signs and Symptoms; Digestive System Diseases	Experimental Model of Disease	870	0	0.3		1	1	0	2014	2014
CD86	942	Asthma	C0004096	disease	Respiratory Tract Diseases; Immune System Diseases	Disease or Syndrome	2096	1536	0.23		1	4	1	2004	2011
CD86	942	Neoplasm Metastasis	C0027627	phenotype	Pathological Conditions, Signs and Symptoms; Neoplasms	Neoplastic Process	6385	327	0.22		1	3	0	2008	2019
CD86	942	Adult T-Cell Lymphoma/Leukemia	C0023493	disease	Neoplasms; Immune System Diseases; Hemic and Lymphatic Diseases	Neoplastic Process	540	11	0.21		1	2	0	2000	2013
CD86	942	Dental Pulp Exposure	C0011406	disease	Stomatognathic Diseases	Disease or Syndrome	7	0	0.2		1	2	0	2010	2010
CD86	942	Corneal Diseases	C0010034	group	Eye Diseases	Disease or Syndrome	47	0	0.2		1	1	0	2010	2010
CD86	942	Infarction, Middle Cerebral Artery	C0740392	disease	Pathological Conditions, Signs and Symptoms; Nervous System Diseases; Cardiovascular Diseases	Disease or Syndrome	145	0	0.2		1	1	0	2009	2009
CD86	942	Bronchiolitis Obliterans	C0006272	disease	Respiratory Tract Diseases	Disease or Syndrome	93	5	0.2		1	1	0	2001	2001
CD86	942	Experimental Autoimmune Encephalomyelitis	C0014072	disease	Immune System Diseases; Nervous System Diseases	Experimental Model of Disease	97	0	0.2		1	1	0	2010	2010
CD86	942	Orchitis	C0029191	phenotype	Male Urogenital Diseases; Endocrine System Diseases	Disease or Syndrome	30	0	0.2		1	1	0	2008	2008
CD86	942	Guillain-Barre Syndrome	C0018378	disease	Immune System Diseases; Nervous System Diseases	Disease or Syndrome	163	13	0.2		1	3	0	2001	2008
CD86	942	Multiple Sclerosis	C0026769	disease	Immune System Diseases; Nervous System Diseases	Disease or Syndrome	1800	1022	0.13		1	4	2	2011	2018
CD86	942	Diffuse Large B-Cell Lymphoma	C0079744	disease	Neoplasms; Immune System Diseases; Hemic and Lymphatic Diseases	Neoplastic Process	1043	127	0.11		1	2	2	2014	2020
CD86	942	Selective immunoglobulin A deficiency	C4049006	disease		Disease or Syndrome	45	23	0.1		1	1	1	2016	2016
CD86	942	Neoplasms	C0027651	group	Neoplasms	Neoplastic Process	10161	1644	0.1		1	26	0	1999	2018
CD86	942	Mature B-Cell Neoplasm	C1334633	disease	Neoplasms; Immune System Diseases; Hemic and Lymphatic Diseases	Neoplastic Process	12	15	0.1		1	1	1	2014	2014
CD86	942	Eosinophil count procedure	C0200638	phenotype		Laboratory Procedure	610	1144	0.1		1	1	1	2019	2019
CD86	942	Immunoglobulin A deficiency (disorder)	C0162538	disease	Immune System Diseases; Hemic and Lymphatic Diseases	Disease or Syndrome	72	25	0.1		1	1	1	2016	2016
CD86	942	Autoimmune Diseases	C0004364	group	Immune System Diseases	Disease or Syndrome	1758	428	0.1		1	11	0	1999	2019
CD86	942	Leukemia, Myelocytic, Acute	C0023467	disease	Neoplasms	Neoplastic Process	3111	6892	0.09		1	9	0	1998	2016
CD86	942	Malignant Neoplasms	C0006826	group	Neoplasms	Neoplastic Process	8621	1641	0.07		1	7	2	1999	2019
CD86	942	Septicemia	C0036690	disease	Pathological Conditions, Signs and Symptoms; Infections	Disease or Syndrome	1285	141	0.07		0.857	7	4	2009	2019
CD86	942	Sepsis	C0243026	disease	Pathological Conditions, Signs and Symptoms; Infections	Disease or Syndrome	1453	144	0.07		0.857	7	4	2009	2019
CD86	942	Primary malignant neoplasm	C1306459	group	Neoplasms	Neoplastic Process	8221	1374	0.07		1	7	2	1999	2019
CD86	942	Rheumatoid Arthritis	C0003873	disease	Skin and Connective Tissue Diseases; Musculoskeletal Diseases; Immune System Diseases	Disease or Syndrome	2723	2387	0.06		0.833	6	2	2000	2019
CD86	942	melanoma	C0025202	disease	Neoplasms	Neoplastic Process	3087	515	0.06		1	6	0	2002	2019
CD86	942	Lupus Erythematosus, Systemic	C0024141	disease	Skin and Connective Tissue Diseases; Immune System Diseases	Disease or Syndrome	1883	1172	0.05		1	5	0	2000	2019
CD86	942	Acute lymphocytic leukemia	C0023449	disease	Neoplasms; Immune System Diseases; Hemic and Lymphatic Diseases	Neoplastic Process	1293	222	0.05		1	5	0	2006	2019
CD86	942	Hepatitis C	C0019196	disease	Digestive System Diseases; Infections	Disease or Syndrome	1768	347	0.04		0.75	4	0	1999	2017
CD86	942	Chronic Lymphocytic Leukemia	C0023434	disease	Neoplasms; Immune System Diseases; Hemic and Lymphatic Diseases	Neoplastic Process	1447	291	0.04		1	4	0	2002	2019
CD86	942	Degenerative polyarthritis	C0029408	disease	Musculoskeletal Diseases	Disease or Syndrome	1827	247	0.04		1	4	0	2000	2018
CD86	942	Tumor Immunity	C1519680	phenotype	Pathological Conditions, Signs and Symptoms	Disease or Syndrome	337	2	0.04		1	4	0	2010	2013
CD86	942	Immune thrombocytopenic purpura	C0398650	disease	Pathological Conditions, Signs and Symptoms; Immune System Diseases; Hemic and Lymphatic Diseases	Disease or Syndrome	338	35	0.04		1	4	0	2014	2019
CD86	942	Influenza	C0021400	disease	Infections; Respiratory Tract Diseases	Disease or Syndrome	858	17	0.03		1	3	0	2000	2019
CD86	942	Liver carcinoma	C2239176	disease	Digestive System Diseases; Neoplasms	Neoplastic Process	5725	942	0.03		1	3	0	2016	2019
CD86	942	Myeloid Leukemia, Chronic	C0023473	disease	Neoplasms; Hemic and Lymphatic Diseases	Neoplastic Process	1172	115	0.03		1	3	0	2002	2018
CD86	942	Coronary Artery Disease	C1956346	disease	Cardiovascular Diseases	Disease or Syndrome	1708	1577	0.03		0.667	3	1	2007	2011
CD86	942	Colorectal Carcinoma	C0009402	disease	Digestive System Diseases; Neoplasms	Neoplastic Process	5473	1962	0.03		1	3	2	2008	2011
CD86	942	Tumor Cell Invasion	C1269955	phenotype		Neoplastic Process	6626	169	0.03		1	3	0	2000	2018
CD86	942	Precursor Cell Lymphoblastic Leukemia Lymphoma	C1961102	disease	Neoplasms; Immune System Diseases; Hemic and Lymphatic Diseases	Neoplastic Process	879	168	0.03		1	3	0	2014	2019
CD86	942	Skin sensitisation	C2939094	disease		Disease or Syndrome	34	0	0.03		1	3	0	2018	2019
CD86	942	Diabetes Mellitus	C0011849	group	Nutritional and Metabolic Diseases; Endocrine System Diseases	Disease or Syndrome	2803	824	0.03		1	3	0	2007	2019
CD86	942	Encephalomyelitis	C0014070	disease	Infections; Nervous System Diseases	Disease or Syndrome	865	7	0.03		1	3	0	1998	2018
CD86	942	Diabetes Mellitus, Insulin-Dependent	C0011854	disease	Nutritional and Metabolic Diseases; Immune System Diseases; Endocrine System Diseases	Disease or Syndrome	1675	954	0.03		1	3	0	1998	2015
CD86	942	Pneumonia	C0032285	disease	Infections; Respiratory Tract Diseases	Disease or Syndrome	1032	33	0.03		1	3	1	2015	2018
CD86	942	Polyradiculoneuropathy, Chronic Inflammatory Demyelinating	C0393819	disease	Immune System Diseases; Nervous System Diseases	Disease or Syndrome	82	4	0.03		1	3	0	2000	2019
CD86	942	Virus Diseases	C0042769	group	Infections	Disease or Syndrome	1471	42	0.02		1	2	0	2000	2017
CD86	942	Pemphigus Foliaceus	C0263313	disease	Skin and Connective Tissue Diseases; Immune System Diseases	Disease or Syndrome	51	16	0.02		1	2	1	2010	2017
CD86	942	Malignant neoplasm of colon and/or rectum	C4722085	disease		Neoplastic Process	3669	502	0.02		1	2	2	2010	2011
CD86	942	Childhood Osteosarcoma	C1332986	disease	Neoplasms	Neoplastic Process	2208	151	0.02		1	2	0	2011	2019
CD86	942	Malignant neoplasm of pancreas	C0346647	disease	Digestive System Diseases; Neoplasms; Endocrine System Diseases	Neoplastic Process	2667	277	0.02		1	2	2	2012	2015
CD86	942	Chronic Obstructive Airway Disease	C0024117	disease	Respiratory Tract Diseases	Disease or Syndrome	1428	852	0.02		0.5	2	2	2010	2018
CD86	942	Osteosarcoma of bone	C0585442	disease	Neoplasms	Neoplastic Process	2247	151	0.02		1	2	0	2011	2019
CD86	942	Pemphigus Vulgaris	C0030809	disease	Skin and Connective Tissue Diseases; Immune System Diseases	Disease or Syndrome	115	39	0.02		1	2	1	2017	2020
CD86	942	Systemic Scleroderma	C0036421	disease	Skin and Connective Tissue Diseases	Disease or Syndrome	979	287	0.02		0.5	2	0	2006	2018
CD86	942	Kaposi Sarcoma	C0036220	disease	Neoplasms; Infections	Neoplastic Process	488	15	0.02		1	2	0	1999	2004
CD86	942	Malignant neoplasm of lung	C0242379	disease	Neoplasms; Respiratory Tract Diseases	Neoplastic Process	4173	1142	0.02		1	2	0	2018	2019
CD86	942	Pancreatic carcinoma	C0235974	disease	Digestive System Diseases; Neoplasms; Endocrine System Diseases	Neoplastic Process	2689	322	0.02		1	2	2	2012	2015
CD86	942	Osteosarcoma	C0029463	disease	Neoplasms	Neoplastic Process	2283	178	0.02		1	2	0	2011	2019
CD86	942	Hyperglycemia	C0020456	disease	Nutritional and Metabolic Diseases	Disease or Syndrome	1098	108	0.02		1	2	0	2019	2020
CD86	942	Diabetes	C0011847	disease	Endocrine System Diseases	Disease or Syndrome	2359	710	0.02		1	2	0	2007	2018
CD86	942	Tuberculosis	C0041296	disease	Infections	Disease or Syndrome	1256	328	0.02		1	2	0	2013	2018
CD86	942	Glioblastoma Multiforme	C1621958	disease	Neoplasms	Neoplastic Process	3197	186	0.02		1	2	0	2017	2017
CD86	942	Crohn Disease	C0010346	disease	Digestive System Diseases	Disease or Syndrome	1382	1147	0.02		1	2	0	2007	2014
CD86	942	Glioblastoma	C0017636	disease	Neoplasms	Neoplastic Process	3177	281	0.02		1	2	0	2017	2017
CD86	942	Glioma	C0017638	disease	Neoplasms	Neoplastic Process	3097	353	0.02		1	2	0	2002	2003
CD86	942	Aortic Valve Stenosis	C0003507	disease	Cardiovascular Diseases	Disease or Syndrome	234	19	0.02		1	2	0	2017	2017
CD86	942	Graves Disease	C0018213	disease	Eye Diseases; Immune System Diseases; Endocrine System Diseases	Disease or Syndrome	585	352	0.02		1	2	0	2005	2020
CD86	942	Common Variable Immunodeficiency	C0009447	disease	Immune System Diseases	Disease or Syndrome	207	85	0.02		1	2	0	2002	2006
CD86	942	Allergic rhinitis (disorder)	C2607914	disease	Respiratory Tract Diseases; Immune System Diseases; Otorhinolaryngologic Diseases	Disease or Syndrome	446	176	0.02		1	2	0	2019	2019
CD86	942	Primary biliary cirrhosis	C0008312	disease	Pathological Conditions, Signs and Symptoms; Digestive System Diseases	Disease or Syndrome	478	667	0.02		1	2	0	2017	2019
CD86	942	Ulcerative Colitis	C0009324	disease	Digestive System Diseases	Disease or Syndrome	1458	827	0.02		1	2	0	2005	2014
CD86	942	Hepatitis B, Chronic	C0524909	disease	Digestive System Diseases; Infections	Disease or Syndrome	415	84	0.01		1	1	0	2012	2012
CD86	942	Immunosuppression	C4048329	disease		Disease or Syndrome	632	9	0.01		1	1	0	2017	2017
CD86	942	Ewings sarcoma	C0553580	disease	Neoplasms	Neoplastic Process	517	25	0.01		1	1	0	2012	2012
CD86	942	Hashimoto Disease	C0677607	disease	Endocrine System Diseases	Disease or Syndrome	335	131	0.01		1	1	0	2020	2020
CD86	942	Human immunodeficiency virus (HIV) II infection category B1	C3854222	disease		Disease or Syndrome	985	56	0.01		1	1	0	2019	2019
CD86	942	Infection	C3714514	group	Infections	Pathologic Function	491	0	0.01		1	1	0	2003	2003
CD86	942	Stage IV Renal Cell Cancer AJCC v7	C3146249	disease		Neoplastic Process	3	0	0.01		1	1	0	2008	2008
CD86	942	Hyperactive behavior	C0424295	phenotype	Pathological Conditions, Signs and Symptoms; Nervous System Diseases	Mental or Behavioral Dysfunction	1263	112	0.01		1	1	0	2003	2003
CD86	942	Nasopharyngeal carcinoma	C2931822	disease	Neoplasms; Stomatognathic Diseases; Otorhinolaryngologic Diseases	Neoplastic Process	1553	320	0.01		1	1	0	2007	2007
CD86	942	Disease due to Parvoviridae	C0276275	disease	Infections	Disease or Syndrome	71	2	0.01		1	1	0	2000	2000
CD86	942	Neuropathy	C0442874	group	Nervous System Diseases	Disease or Syndrome	484	110	0.01		1	1	0	2000	2000
CD86	942	Adult Acute Lymphocytic Leukemia	C0751606	disease		Neoplastic Process	860	154	0.01		1	1	0	2011	2011
CD86	942	Pre B-cell acute lymphoblastic leukemia	C0349636	disease		Neoplastic Process	90	5	0.01		1	1	0	2015	2015
CD86	942	Squamous cell carcinoma of tongue	C0349566	disease	Neoplasms; Stomatognathic Diseases	Neoplastic Process	462	2	0.01		1	1	0	2019	2019
CD86	942	Recurrent Childhood Rhabdomyosarcoma	C0278649	disease		Neoplastic Process	5	0	0.01		1	1	0	2013	2013
CD86	942	Adult Glioblastoma	C0278878	disease	Neoplasms	Neoplastic Process	2528	98	0.01		1	1	0	2017	2017
CD86	942	Childhood B Acute Lymphoblastic Leukemia	C0279584	disease	Neoplasms; Immune System Diseases; Hemic and Lymphatic Diseases	Neoplastic Process	99	4	0.01		1	1	0	2015	2015
CD86	942	Carcinoma, Ovarian Epithelial	C4721610	disease	Neoplasms; Female Urogenital Diseases and Pregnancy Complications; Endocrine System Diseases	Neoplastic Process	2841	327	0.01		1	1	0	2004	2004
CD86	942	Peripheral Nervous System Diseases	C4721453	group	Nervous System Diseases	Disease or Syndrome	549	69	0.01		1	1	0	2019	2019
CD86	942	Adult B Acute Lymphoblastic Leukemia	C0279593	disease		Neoplastic Process	74	0	0.01		1	1	0	2015	2015
CD86	942	Childhood Glioblastoma	C0280474	disease	Neoplasms	Neoplastic Process	2527	98	0.01		1	1	0	2017	2017
CD86	942	Miscarriage	C4552766	disease	Female Urogenital Diseases and Pregnancy Complications	Disease or Syndrome	426	56	0.01		1	1	0	2011	2011
CD86	942	Tumor necrosis	C0333516	phenotype	Pathological Conditions, Signs and Symptoms	Neoplastic Process	350	1	0.01		1	1	0	2011	2011
CD86	942	Hyperplastic Polyp	C0333983	disease	Pathological Conditions, Signs and Symptoms	Neoplastic Process	204	22	0.01		1	1	0	2018	2018
CD86	942	Thyroid associated opthalmopathies	C0339143	disease	Congenital, Hereditary, and Neonatal Diseases and Abnormalities; Eye Diseases; Immune System Diseases; Endocrine System Diseases	Disease or Syndrome	211	49	0.01		1	1	0	2011	2011
CD86	942	Chronic Chagas' disease	C0343804	disease	Infections	Disease or Syndrome	52	4	0.01		1	1	0	2018	2018
CD86	942	Childhood Neuroblastoma	C4086165	disease	Neoplasms	Neoplastic Process	2420	231	0.01		1	1	0	2010	2010
CD86	942	Carcinomatosis of peritoneal cavity	C0346990	disease	Digestive System Diseases; Neoplasms	Neoplastic Process	107	3	0.01		1	1	0	2000	2000
CD86	942	Recurrent aphthous ulcer	C2937365	disease	Stomatognathic Diseases	Disease or Syndrome	80	22	0.01		1	1	0	2015	2015
CD86	942	Acute type B viral hepatitis	C0276609	disease	Digestive System Diseases; Infections	Disease or Syndrome	38	0	0.01		1	1	0	2012	2012
CD86	942	Breast Carcinoma	C0678222	disease	Neoplasms; Skin and Connective Tissue Diseases	Neoplastic Process	6776	2793	0.01		1	1	0	2018	2018
CD86	942	Infantile nystagmus syndrome	C1533172	disease	Eye Diseases; Nervous System Diseases	Disease or Syndrome	54	8	0.01		0	1	0	2019	2019
CD86	942	Alloimmunisation	C0948201	disease		Disease or Syndrome	65	3	0.01		1	1	0	2017	2017
CD86	942	Progressive multiple sclerosis	C1095979	disease		Disease or Syndrome	37	0	0.01		1	1	0	2003	2003
CD86	942	Malignant neoplasm of ovary	C1140680	disease	Neoplasms; Female Urogenital Diseases and Pregnancy Complications; Endocrine System Diseases	Neoplastic Process	2563	315	0.01		1	1	0	2004	2004
CD86	942	Mammary Neoplasms	C1458155	group	Neoplasms; Skin and Connective Tissue Diseases	Neoplastic Process	2780	385	0.01		1	1	0	2013	2013
CD86	942	Classical Hodgkin's Lymphoma	C1333064	disease	Neoplasms; Immune System Diseases; Hemic and Lymphatic Diseases	Neoplastic Process	285	20	0.01		1	1	0	2019	2019
CD86	942	AIDS-Related Non-Hodgkin Lymphoma	C1332051	disease	Neoplasms; Immune System Diseases; Hemic and Lymphatic Diseases	Neoplastic Process	15	0	0.01		1	1	0	2013	2013
CD86	942	Non-toxic nodular goiter	C1318500	disease	Endocrine System Diseases	Disease or Syndrome	5	0	0.01		1	1	0	2005	2005
CD86	942	Eosinophilic disorder	C1306759	group	Hemic and Lymphatic Diseases	Disease or Syndrome	288	22	0.01		1	1	1	2001	2001
CD86	942	Primary malignant neoplasm of lung	C1306460	disease	Neoplasms; Respiratory Tract Diseases	Neoplastic Process	3894	981	0.01		1	1	0	2018	2018
CD86	942	Acute and chronic colitis	C1300682	disease	Digestive System Diseases	Disease or Syndrome	10	0	0.01		1	1	0	2014	2014
CD86	942	Inflammatory disorder	C1290884	group	Pathological Conditions, Signs and Symptoms	Disease or Syndrome	391	8	0.01		1	1	0	1998	1998
CD86	942	Precursor B-cell lymphoblastic leukemia	C1292769	disease	Neoplasms; Immune System Diseases; Hemic and Lymphatic Diseases	Neoplastic Process	478	23	0.01		1	1	0	2015	2015
CD86	942	ST segment elevation myocardial infarction	C1536220	disease	Pathological Conditions, Signs and Symptoms; Cardiovascular Diseases	Disease or Syndrome	264	16	0.01		1	1	0	2011	2011
CD86	942	precancerous lesions	C0940937	phenotype		Neoplastic Process	270	19	0.01		1	1	0	2018	2018
CD86	942	Chronic graft-versus-host disease	C0867389	disease	Immune System Diseases	Disease or Syndrome	241	17	0.01		1	1	0	2017	2017
CD86	942	Carcinoma of lung	C0684249	disease	Neoplasms; Respiratory Tract Diseases	Neoplastic Process	4081	1204	0.01		1	1	0	2018	2018
CD86	942	Lymphocytic infiltration	C1262091	disease		Disease or Syndrome	84	2	0.01		1	1	0	2018	2018
CD86	942	Carcinoma of bladder	C0699885	disease	Neoplasms; Female Urogenital Diseases and Pregnancy Complications; Male Urogenital Diseases	Neoplastic Process	2104	309	0.01		1	1	0	1999	1999
CD86	942	Central neuroblastoma	C0700095	disease	Neoplasms; Nervous System Diseases	Neoplastic Process	2419	231	0.01		1	1	0	2010	2010
CD86	942	B-CELL MALIGNANCY, LOW-GRADE	C1868683	disease		Neoplastic Process	350	19	0.01		1	1	0	2002	2002
CD86	942	TARSAL-CARPAL COALITION SYNDROME	C1861305	disease	Congenital, Hereditary, and Neonatal Diseases and Abnormalities; Musculoskeletal Diseases	Disease or Syndrome	261	13	0.01		1	1	0	1999	1999
CD86	942	Severe Sepsis	C1719672	disease	Pathological Conditions, Signs and Symptoms; Infections	Disease or Syndrome	181	29	0.01		1	1	0	2013	2013
CD86	942	early pregnancy	C0747845	phenotype		Disease or Syndrome	273	8	0.01		1	1	0	2011	2011
CD86	942	Idiopathic Inflammatory Myopathies	C0751356	disease	Musculoskeletal Diseases; Nervous System Diseases	Disease or Syndrome	106	4	0.01		1	1	0	2012	2012
CD86	942	Pregnancy associated hypertension	C0852036	phenotype	Female Urogenital Diseases and Pregnancy Complications; Cardiovascular Diseases	Disease or Syndrome	186	43	0.01		1	1	0	2018	2018
CD86	942	Recurrent Rhabdomyosarcoma	C0855069	disease	Neoplasms	Neoplastic Process	5	0	0.01		1	1	0	2013	2013
CD86	942	Secondary malignant neoplasm of lymph node	C0686619	disease	Pathological Conditions, Signs and Symptoms; Neoplasms	Neoplastic Process	2825	188	0.01		0	1	0	2017	2017
CD86	942	Stage IV Renal Cell Cancer	C0862448	disease	Neoplasms; Female Urogenital Diseases and Pregnancy Complications; Male Urogenital Diseases	Neoplastic Process	4	0	0.01		1	1	0	2008	2008
CD86	942	Primary Effusion Lymphoma	C1292753	disease	Neoplasms; Immune System Diseases; Hemic and Lymphatic Diseases	Neoplastic Process	169	0	0.01		1	1	0	2017	2017
CD86	942	Adenocarcinoma	C0001418	group	Neoplasms	Neoplastic Process	2235	168	0.01		1	1	0	2019	2019
CD86	942	Herpes Simplex Infections	C0019348	group	Infections; Skin and Connective Tissue Diseases	Disease or Syndrome	645	11	0.01		1	1	0	2003	2003
CD86	942	Hamartoma Syndrome, Multiple	C0018553	disease	Congenital, Hereditary, and Neonatal Diseases and Abnormalities; Neoplasms	Neoplastic Process	270	139	0.01		1	1	0	2007	2007
CD86	942	Graft-vs-Host Disease	C0018133	disease	Immune System Diseases	Disease or Syndrome	447	25	0.01		1	1	0	2008	2008
CD86	942	IGA Glomerulonephritis	C0017661	disease	Female Urogenital Diseases and Pregnancy Complications; Male Urogenital Diseases; Immune System Diseases	Disease or Syndrome	456	130	0.01		1	1	0	2004	2004
CD86	942	Eosinophilia	C0014457	disease	Hemic and Lymphatic Diseases	Disease or Syndrome	325	23	0.01		1	1	1	2001	2001
CD86	942	Endometriosis	C0014175	disease	Female Urogenital Diseases and Pregnancy Complications	Disease or Syndrome	1188	274	0.01		1	1	0	2018	2018
CD86	942	Eczema	C0013595	disease	Skin and Connective Tissue Diseases	Disease or Syndrome	863	368	0.01		0	1	0	2018	2018
CD86	942	Diabetes Mellitus, Non-Insulin-Dependent	C0011860	disease	Nutritional and Metabolic Diseases; Endocrine System Diseases	Disease or Syndrome	3134	2672	0.01		1	1	0	2018	2018
CD86	942	Histiocytosis, Langerhans-Cell	C0019621	disease	Respiratory Tract Diseases; Hemic and Lymphatic Diseases	Neoplastic Process	104	12	0.01		1	1	0	2017	2017
CD86	942	HIV Infections	C0019693	group	Infections; Immune System Diseases	Disease or Syndrome	807	142	0.01		1	1	0	2000	2000
CD86	942	Lupus Nephritis	C0024143	disease	Female Urogenital Diseases and Pregnancy Complications; Skin and Connective Tissue Diseases; Male Urogenital Diseases; Immune System Diseases	Disease or Syndrome	503	64	0.01		1	1	0	2019	2019
CD86	942	Leukemia, T-Cell	C0023492	disease	Neoplasms; Immune System Diseases; Hemic and Lymphatic Diseases	Neoplastic Process	457	10	0.01		1	1	0	2013	2013
CD86	942	Childhood Acute Lymphoblastic Leukemia	C0023452	disease	Neoplasms; Immune System Diseases; Hemic and Lymphatic Diseases	Neoplastic Process	1096	261	0.01		1	1	0	2011	2011
CD86	942	leukemia	C0023418	disease	Neoplasms	Neoplastic Process	2111	144	0.01		1	1	0	2002	2002
CD86	942	Leishmaniasis	C0023281	disease	Infections; Skin and Connective Tissue Diseases	Disease or Syndrome	198	4	0.01		1	1	0	2018	2018
CD86	942	Inflammatory Bowel Diseases	C0021390	group	Digestive System Diseases	Disease or Syndrome	1577	605	0.01		1	1	0	2018	2018
CD86	942	Hypertensive disease	C0020538	group	Cardiovascular Diseases	Disease or Syndrome	2322	1085	0.01		1	1	0	2019	2019
CD86	942	Hodgkin Disease	C0019829	disease	Neoplasms; Immune System Diseases; Hemic and Lymphatic Diseases	Neoplastic Process	900	148	0.01		1	1	0	1999	1999
CD86	942	Dermatitis, Atopic	C0011615	disease	Congenital, Hereditary, and Neonatal Diseases and Abnormalities; Skin and Connective Tissue Diseases; Immune System Diseases	Disease or Syndrome	751	232	0.01		0	1	0	2018	2018
CD86	942	Coxsackievirus Infections	C0010246	group	Infections	Disease or Syndrome	48	1	0.01		1	1	0	2018	2018
CD86	942	Bladder Neoplasm	C0005695	disease	Neoplasms; Female Urogenital Diseases and Pregnancy Complications; Male Urogenital Diseases	Neoplastic Process	2130	281	0.01		1	1	0	1999	1999
CD86	942	Malignant neoplasm of urinary bladder	C0005684	disease	Neoplasms; Female Urogenital Diseases and Pregnancy Complications; Male Urogenital Diseases	Neoplastic Process	2113	316	0.01		1	1	0	1999	1999
CD86	942	Bacterial Infections	C0004623	group	Infections	Disease or Syndrome	616	17	0.01		1	1	0	2017	2017
CD86	942	Atherosclerosis	C0004153	disease	Cardiovascular Diseases	Disease or Syndrome	2044	281	0.01		1	1	0	2008	2008
CD86	942	Arthritis, Psoriatic	C0003872	disease	Skin and Connective Tissue Diseases; Musculoskeletal Diseases	Disease or Syndrome	450	89	0.01		1	1	0	2006	2006
CD86	942	anaphylaxis	C0002792	phenotype	Immune System Diseases	Disease or Syndrome	180	4	0.01		1	1	0	2019	2019
CD86	942	Alzheimer's Disease	C0002395	disease	Nervous System Diseases; Mental Disorders	Disease or Syndrome	3397	1843	0.01		1	1	0	2015	2015
CD86	942	Adenoma	C0001430	group	Neoplasms	Neoplastic Process	1183	103	0.01		1	1	0	2018	2018
CD86	942	Malignant neoplasm of breast	C0006142	disease	Neoplasms; Skin and Connective Tissue Diseases	Neoplastic Process	6941	3417	0.01		1	1	0	2018	2018
CD86	942	Brucellosis	C0006309	disease	Infections	Disease or Syndrome	92	30	0.01		1	1	2	2014	2014
CD86	942	Cowpox	C0010232	disease	Infections	Disease or Syndrome	19	0	0.01		1	1	0	2019	2019
CD86	942	Coronary heart disease	C0010068	disease	Cardiovascular Diseases	Disease or Syndrome	1576	1178	0.01		1	1	0	2010	2010
CD86	942	Coronary Arteriosclerosis	C0010054	disease	Cardiovascular Diseases	Disease or Syndrome	1282	440	0.01		1	1	0	2010	2010
CD86	942	Colonic Polyps	C0009376	phenotype	Pathological Conditions, Signs and Symptoms	Anatomical Abnormality	69	8	0.01		1	1	0	2018	2018
CD86	942	Celiac Disease	C0007570	disease	Digestive System Diseases; Nutritional and Metabolic Diseases	Disease or Syndrome	527	263	0.01		1	1	0	2002	2002
CD86	942	Cardiovascular Diseases	C0007222	group	Cardiovascular Diseases	Disease or Syndrome	1756	711	0.01		0	1	0	2010	2010
CD86	942	Non-Small Cell Lung Carcinoma	C0007131	disease	Neoplasms; Respiratory Tract Diseases	Neoplastic Process	3926	712	0.01		1	1	0	2001	2001
CD86	942	Noninfiltrating Intraductal Carcinoma	C0007124	disease	Neoplasms	Neoplastic Process	486	13	0.01		1	1	0	2015	2015
CD86	942	Marinesco-Sjogren syndrome	C0024814	disease	Congenital, Hereditary, and Neonatal Diseases and Abnormalities; Nervous System Diseases	Disease or Syndrome	133	8	0.01		1	1	0	2018	2018
CD86	942	Myasthenia Gravis	C0026896	disease	Neoplasms; Immune System Diseases; Nervous System Diseases	Disease or Syndrome	336	93	0.01		1	1	0	2003	2003
CD86	942	CREST Syndrome	C0206138	disease	Digestive System Diseases; Nutritional and Metabolic Diseases; Skin and Connective Tissue Diseases; Cardiovascular Diseases	Disease or Syndrome	59	6	0.01		1	1	0	2017	2017
CD86	942	General Paralysis	C0205858	disease	Infections; Nervous System Diseases	Disease or Syndrome	12	3	0.01		1	1	0	2018	2018
CD86	942	Autoimmune thyroid disease	C0178468	disease	Immune System Diseases; Endocrine System Diseases	Disease or Syndrome	107	15	0.01		1	1	0	2020	2020
CD86	942	Liver Failure, Acute	C0162557	disease	Digestive System Diseases	Disease or Syndrome	282	21	0.01		1	1	0	2012	2012
CD86	942	Allergic asthma	C0155877	disease	Respiratory Tract Diseases; Immune System Diseases	Disease or Syndrome	371	55	0.01		1	1	0	2018	2018
CD86	942	Secondary malignant neoplasm of lung	C0153676	disease	Neoplasms; Respiratory Tract Diseases	Neoplastic Process	1370	20	0.01		1	1	0	2017	2017
CD86	942	Malignant neoplasm of mouth	C0153381	group	Neoplasms; Stomatognathic Diseases	Neoplastic Process	756	184	0.01		1	1	0	2017	2017
CD86	942	Rheumatic Chorea	C0152113	disease	Pathological Conditions, Signs and Symptoms; Nervous System Diseases	Disease or Syndrome	5	0	0.01		1	1	0	2010	2010
CD86	942	Lichen Planus, Oral	C0206139	disease	Skin and Connective Tissue Diseases; Stomatognathic Diseases	Disease or Syndrome	257	20	0.01		1	1	0	2017	2017
CD86	942	Cervical Intraepithelial Neoplasia	C0206708	disease	Neoplasms	Neoplastic Process	398	29	0.01		1	1	0	2013	2013
CD86	942	Thrombocytopenia due to platelet alloimmunization	C0272286	disease	Hemic and Lymphatic Diseases	Disease or Syndrome	111	7	0.01		1	1	0	2014	2014
CD86	942	Axonal neuropathy	C0270921	disease	Nervous System Diseases	Disease or Syndrome	59	13	0.01		1	1	0	2000	2000
CD86	942	Triglyceride storage disease with ichthyosis	C0268238	disease	Congenital, Hereditary, and Neonatal Diseases and Abnormalities; Nutritional and Metabolic Diseases; Skin and Connective Tissue Diseases; Musculoskeletal Diseases; Nervous System Diseases	Disease or Syndrome	41	8	0.01		1	1	0	2017	2017
CD86	942	Chronic arthritis	C0263680	disease	Musculoskeletal Diseases	Disease or Syndrome	30	1	0.01		1	1	0	1996	1996
CD86	942	Neoplasm, Residual	C0242596	phenotype	Pathological Conditions, Signs and Symptoms; Neoplasms	Neoplastic Process	329	23	0.01		1	1	0	2018	2018
CD86	942	Autoimmune thrombocytopenia	C0242584	disease	Immune System Diseases; Hemic and Lymphatic Diseases	Disease or Syndrome	115	7	0.01		1	1	0	2014	2014
CD86	942	Malignant ascites	C0220656	disease	Pathological Conditions, Signs and Symptoms; Digestive System Diseases; Neoplasms	Neoplastic Process	86	0	0.01		1	1	0	2000	2000
CD86	942	Lip and Oral Cavity Carcinoma	C0220641	disease	Neoplasms; Stomatognathic Diseases	Neoplastic Process	734	172	0.01		1	1	0	2017	2017
CD86	942	Complete atrioventricular block	C0151517	disease	Pathological Conditions, Signs and Symptoms; Cardiovascular Diseases	Disease or Syndrome	403	96	0.01		1	1	0	2012	2012
CD86	942	Polymyositis	C0085655	disease	Musculoskeletal Diseases; Nervous System Diseases	Disease or Syndrome	183	22	0.01		1	1	0	2002	2002
CD86	942	Rectal polyp	C0034887	disease	Pathological Conditions, Signs and Symptoms; Digestive System Diseases; Neoplasms	Neoplastic Process	13	0	0.01		1	1	0	2018	2018
CD86	942	Psoriasis	C0033860	disease	Skin and Connective Tissue Diseases	Disease or Syndrome	1308	705	0.01		1	1	0	2018	2018
CD86	942	polyps	C0032584	phenotype	Pathological Conditions, Signs and Symptoms	Anatomical Abnormality	390	18	0.01		1	1	0	2018	2018
CD86	942	Peripheral Neuropathy	C0031117	group	Nervous System Diseases	Disease or Syndrome	351	81	0.01		1	1	0	2019	2019
CD86	942	Pemphigus	C0030807	disease	Skin and Connective Tissue Diseases; Immune System Diseases	Disease or Syndrome	67	3	0.01		1	1	0	2017	2017
CD86	942	Ovarian Carcinoma	C0029925	disease	Neoplasms; Female Urogenital Diseases and Pregnancy Complications; Endocrine System Diseases	Neoplastic Process	539	19	0.01		1	1	0	2004	2004
CD86	942	Neuroblastoma	C0027819	disease	Neoplasms	Neoplastic Process	2509	386	0.01		1	1	0	2010	2010
CD86	942	Nephritis	C0027697	disease	Female Urogenital Diseases and Pregnancy Complications; Male Urogenital Diseases	Disease or Syndrome	296	40	0.01		1	1	0	2019	2019
CD86	942	Reticuloendotheliosis, X-linked	C0035288	disease	Congenital, Hereditary, and Neonatal Diseases and Abnormalities; Nutritional and Metabolic Diseases; Immune System Diseases	Neoplastic Process	48	1	0.01		1	1	0	2008	2008
CD86	942	Sarcoidosis	C0036202	disease	Hemic and Lymphatic Diseases	Disease or Syndrome	413	787	0.01		1	1	0	2005	2005
CD86	942	Gestational Diabetes	C0085207	phenotype	Nutritional and Metabolic Diseases; Female Urogenital Diseases and Pregnancy Complications; Endocrine System Diseases	Disease or Syndrome	649	224	0.01		1	1	0	2017	2017
CD86	942	Peripheral T-Cell Lymphoma	C0079774	disease	Neoplasms; Immune System Diseases; Hemic and Lymphatic Diseases	Neoplastic Process	190	10	0.01		1	1	0	2016	2016
CD86	942	B-Cell Lymphomas	C0079731	group	Neoplasms; Immune System Diseases; Hemic and Lymphatic Diseases	Neoplastic Process	1408	42	0.01		1	1	0	2002	2002
CD86	942	Chagas Disease	C0041234	disease	Infections	Disease or Syndrome	202	10	0.01		1	1	0	2018	2018
CD86	942	Thyroid Neoplasm	C0040136	disease	Neoplasms; Endocrine System Diseases	Neoplastic Process	1164	135	0.01		1	1	0	2002	2002
CD86	942	Status Epilepticus	C0038220	disease	Pathological Conditions, Signs and Symptoms; Nervous System Diseases	Disease or Syndrome	533	12	0.01		1	1	0	2014	2014
CD86	942	Dermatologic disorders	C0037274	group	Skin and Connective Tissue Diseases	Disease or Syndrome	617	21	0.01		1	1	0	2011	2011
CD86	942	Schistosomiasis	C0036323	disease	Infections	Disease or Syndrome	152	4	0.01		1	1	0	2018	2018
CD86	942	Viral myocarditis	C0276138	disease	Infections; Cardiovascular Diseases	Disease or Syndrome	129	2	0.01		1	1	0	2018	2018

## Sheet: FCGR3A
Gene	Gene_id	Disease	Disease_id	Type	Disease_Class	Semantic_Type	N_genes_d	N_SNPs_d	Score_gda	EL_gda	EI_gda	N_PMIDs	N_SNPs_gda	First_Ref	Last_Ref
FCGR3A	2214	IMMUNODEFICIENCY 20	C3810342	disease		Disease or Syndrome	1	1	0.6	moderate	1	4	1	1996	2012
FCGR3A	2214	Celiac Disease	C0007570	disease	Digestive System Diseases; Nutritional and Metabolic Diseases	Disease or Syndrome	527	263	0.32		1	3	0	2009	2018
FCGR3A	2214	Lupus Meningoencephalitis	C0752334	disease	Infections; Skin and Connective Tissue Diseases; Immune System Diseases; Nervous System Diseases; Cardiovascular Diseases	Disease or Syndrome	3	0	0.3		1	1	0	2016	2016
FCGR3A	2214	Lupus Vasculitis, Central Nervous System	C0752332	disease	Infections; Skin and Connective Tissue Diseases; Immune System Diseases; Nervous System Diseases; Cardiovascular Diseases	Disease or Syndrome	7	0	0.3		1	1	0	2016	2016
FCGR3A	2214	Liver Cirrhosis, Experimental	C0023893	disease	Pathological Conditions, Signs and Symptoms; Digestive System Diseases	Experimental Model of Disease	870	0	0.3		1	1	0	2014	2014
FCGR3A	2214	Neuropsychiatric Systemic Lupus Erythematosus	C0752335	disease	Infections; Skin and Connective Tissue Diseases; Immune System Diseases; Nervous System Diseases; Cardiovascular Diseases	Disease or Syndrome	33	3	0.3		1	1	0	2016	2016
FCGR3A	2214	Temporomandibular Joint Dysfunction Syndrome	C0039496	disease	Musculoskeletal Diseases; Stomatognathic Diseases	Disease or Syndrome	24	2	0.2		1	1	0	2010	2010
FCGR3A	2214	Recurrent sinusitis	C0581354	disease	Infections; Respiratory Tract Diseases; Otorhinolaryngologic Diseases	Disease or Syndrome	41	3	0.1			0	0
FCGR3A	2214	Rheumatoid Arthritis	C0003873	disease	Skin and Connective Tissue Diseases; Musculoskeletal Diseases; Immune System Diseases	Disease or Syndrome	2723	2387	0.1		0.909	33	3	1990	2019
FCGR3A	2214	Crohn Disease	C0010346	disease	Digestive System Diseases	Disease or Syndrome	1382	1147	0.1		1	10	0	2004	2018
FCGR3A	2214	Primary malignant neoplasm	C1306459	group	Neoplasms	Neoplastic Process	8221	1374	0.1		1	10	0	2010	2020
FCGR3A	2214	Colorectal Carcinoma	C0009402	disease	Digestive System Diseases; Neoplasms	Neoplastic Process	5473	1962	0.1		1	10	0	2010	2020
FCGR3A	2214	Malignant Neoplasms	C0006826	group	Neoplasms	Neoplastic Process	8621	1641	0.1		1	12	0	2010	2020
FCGR3A	2214	Lupus Erythematosus, Systemic	C0024141	disease	Skin and Connective Tissue Diseases; Immune System Diseases	Disease or Syndrome	1883	1172	0.1		0.846	39	5	1998	2019
FCGR3A	2214	Immunologic Deficiency Syndromes	C0021051	group	Immune System Diseases	Disease or Syndrome	973	31	0.1			0	0
FCGR3A	2214	Lymphoma, Follicular	C0024301	disease	Neoplasms; Immune System Diseases; Hemic and Lymphatic Diseases	Neoplastic Process	477	83	0.1		0.909	11	1	2002	2017
FCGR3A	2214	Recurrent otitis media	C0747085	disease	Otorhinolaryngologic Diseases	Disease or Syndrome	120	11	0.1			0	0
FCGR3A	2214	Immune thrombocytopenic purpura	C0398650	disease	Pathological Conditions, Signs and Symptoms; Immune System Diseases; Hemic and Lymphatic Diseases	Disease or Syndrome	338	35	0.1		0.818	11	1	2003	2019
FCGR3A	2214	Neoplasms	C0027651	group	Neoplasms	Neoplastic Process	10161	1644	0.1		1	30	1	1993	2019
FCGR3A	2214	Secondary malignant neoplasm of colon and/or rectum	C4721579	disease	Digestive System Diseases; Neoplasms	Neoplastic Process	397	68	0.1		0.75	12	0	2007	2019
FCGR3A	2214	Autoimmune Diseases	C0004364	group	Immune System Diseases	Disease or Syndrome	1758	428	0.1		0.933	15	1	1998	2017
FCGR3A	2214	Lupus Nephritis	C0024143	disease	Female Urogenital Diseases and Pregnancy Complications; Skin and Connective Tissue Diseases; Male Urogenital Diseases; Immune System Diseases	Disease or Syndrome	503	64	0.09		1	9	2	1998	2018
FCGR3A	2214	Diffuse Large B-Cell Lymphoma	C0079744	disease	Neoplasms; Immune System Diseases; Hemic and Lymphatic Diseases	Neoplastic Process	1043	127	0.09		0.667	9	0	2006	2018
FCGR3A	2214	HIV Infections	C0019693	group	Infections; Immune System Diseases	Disease or Syndrome	807	142	0.08		0.875	8	2	2000	2019
FCGR3A	2214	Nephritis	C0027697	disease	Female Urogenital Diseases and Pregnancy Complications; Male Urogenital Diseases	Disease or Syndrome	296	40	0.08		0.875	8	1	1999	2019
FCGR3A	2214	HIV-1 infection	C2363741	disease		Disease or Syndrome	695	94	0.08		0.875	8	0	2007	2019
FCGR3A	2214	Coronary Artery Disease	C1956346	disease	Cardiovascular Diseases	Disease or Syndrome	1708	1577	0.08		1	8	0	2004	2018
FCGR3A	2214	Chronic Lymphocytic Leukemia	C0023434	disease	Neoplasms; Immune System Diseases; Hemic and Lymphatic Diseases	Neoplastic Process	1447	291	0.08		0.75	8	0	1995	2017
FCGR3A	2214	Tuberculosis	C0041296	disease	Infections	Disease or Syndrome	1256	328	0.07		0.857	7	0	2010	2019
FCGR3A	2214	Asthma	C0004096	disease	Respiratory Tract Diseases; Immune System Diseases	Disease or Syndrome	2096	1536	0.07		1	7	1	2008	2019
FCGR3A	2214	Human immunodeficiency virus (HIV) II infection category B1	C3854222	disease		Disease or Syndrome	985	56	0.07		1	7	0	1998	2019
FCGR3A	2214	Atherosclerosis	C0004153	disease	Cardiovascular Diseases	Disease or Syndrome	2044	281	0.07		1	7	0	2008	2017
FCGR3A	2214	Coronary Arteriosclerosis	C0010054	disease	Cardiovascular Diseases	Disease or Syndrome	1282	440	0.06		1	6	0	2005	2017
FCGR3A	2214	Malignant neoplasm of breast	C0006142	disease	Neoplasms; Skin and Connective Tissue Diseases	Neoplastic Process	6941	3417	0.06		0.833	6	0	1994	2015
FCGR3A	2214	Hodgkin Disease	C0019829	disease	Neoplasms; Immune System Diseases; Hemic and Lymphatic Diseases	Neoplastic Process	900	148	0.06		1	6	0	2002	2018
FCGR3A	2214	Arteriosclerosis	C0003850	disease	Cardiovascular Diseases	Disease or Syndrome	2006	267	0.06		1	6	0	2011	2017
FCGR3A	2214	Adult Diffuse Large B-Cell Lymphoma	C1332201	disease	Neoplasms; Immune System Diseases; Hemic and Lymphatic Diseases	Neoplastic Process	504	46	0.06		0.833	6	0	2006	2017
FCGR3A	2214	Lupus Erythematosus, Discoid	C0024138	disease	Skin and Connective Tissue Diseases	Disease or Syndrome	552	46	0.05		1	5	0	1998	2018
FCGR3A	2214	Inflammatory Bowel Diseases	C0021390	group	Digestive System Diseases	Disease or Syndrome	1577	605	0.05		0.8	5	0	1994	2018
FCGR3A	2214	Coronary heart disease	C0010068	disease	Cardiovascular Diseases	Disease or Syndrome	1576	1178	0.05		1	5	0	2012	2017
FCGR3A	2214	Leukemia, Myelocytic, Acute	C0023467	disease	Neoplasms	Neoplastic Process	3111	6892	0.05		1	5	0	1994	2019
FCGR3A	2214	Lymphoma, Non-Hodgkin, Familial	C4721532	disease	Neoplasms; Immune System Diseases; Hemic and Lymphatic Diseases	Neoplastic Process	462	79	0.05		1	5	0	2002	2016
FCGR3A	2214	Lymphoma, Non-Hodgkin	C0024305	disease	Neoplasms; Immune System Diseases; Hemic and Lymphatic Diseases	Neoplastic Process	733	197	0.05		0.8	5	0	2002	2016
FCGR3A	2214	Adult Non-Hodgkin Lymphoma	C0220605	disease	Neoplasms; Immune System Diseases; Hemic and Lymphatic Diseases	Neoplastic Process	370	39	0.05		1	5	0	2002	2016
FCGR3A	2214	Lupus Erythematosus	C0409974	disease	Pathological Conditions, Signs and Symptoms; Skin and Connective Tissue Diseases; Immune System Diseases	Disease or Syndrome	558	44	0.05		1	5	0	1998	2018
FCGR3A	2214	Breast Carcinoma	C0678222	disease	Neoplasms; Skin and Connective Tissue Diseases	Neoplastic Process	6776	2793	0.05		0.8	5	0	1994	2015
FCGR3A	2214	Paroxysmal nocturnal hemoglobinuria	C0024790	disease	Hemic and Lymphatic Diseases	Disease or Syndrome	132	12	0.05		1	5	0	1994	2017
FCGR3A	2214	Hepatitis C	C0019196	disease	Digestive System Diseases; Infections	Disease or Syndrome	1768	347	0.05		1	5	0	2008	2017
FCGR3A	2214	Sepsis	C0243026	disease	Pathological Conditions, Signs and Symptoms; Infections	Disease or Syndrome	1453	144	0.05		1	5	0	2001	2019
FCGR3A	2214	Childhood Non-Hodgkin Lymphoma	C0220612	disease	Neoplasms; Immune System Diseases; Hemic and Lymphatic Diseases	Neoplastic Process	371	39	0.05		1	5	0	2002	2016
FCGR3A	2214	Lupus Vulgaris	C0024131	disease	Infections; Skin and Connective Tissue Diseases	Disease or Syndrome	526	44	0.05		1	5	0	1998	2018
FCGR3A	2214	Psoriasis	C0033860	disease	Skin and Connective Tissue Diseases	Disease or Syndrome	1308	705	0.04		1	4	0	2013	2017
FCGR3A	2214	Sarcoidosis	C0036202	disease	Hemic and Lymphatic Diseases	Disease or Syndrome	413	787	0.04		1	4	0	2012	2016
FCGR3A	2214	Septicemia	C0036690	disease	Pathological Conditions, Signs and Symptoms; Infections	Disease or Syndrome	1285	141	0.04		1	4	0	2001	2019
FCGR3A	2214	Takayasu Arteritis	C0039263	disease	Skin and Connective Tissue Diseases; Cardiovascular Diseases	Disease or Syndrome	136	55	0.04		0.75	4	0	2013	2018
FCGR3A	2214	B-Cell Lymphomas	C0079731	group	Neoplasms; Immune System Diseases; Hemic and Lymphatic Diseases	Neoplastic Process	1408	42	0.04		1	4	0	2007	2016
FCGR3A	2214	IGA Glomerulonephritis	C0017661	disease	Female Urogenital Diseases and Pregnancy Complications; Male Urogenital Diseases; Immune System Diseases	Disease or Syndrome	456	130	0.04		1	4	0	1997	2018
FCGR3A	2214	Chronic Kidney Diseases	C1561643	group	Female Urogenital Diseases and Pregnancy Complications; Male Urogenital Diseases	Disease or Syndrome	1074	306	0.04		1	4	0	2015	2018
FCGR3A	2214	Liver carcinoma	C2239176	disease	Digestive System Diseases; Neoplasms	Neoplastic Process	5725	942	0.04		1	4	0	2016	2018
FCGR3A	2214	Lymphoma	C0024299	group	Neoplasms; Immune System Diseases; Hemic and Lymphatic Diseases	Neoplastic Process	1548	91	0.03		0.667	3	0	2001	2019
FCGR3A	2214	Lymphocytosis	C0024282	disease	Hemic and Lymphatic Diseases	Disease or Syndrome	78	1	0.03		1	3	0	1988	2015
FCGR3A	2214	leukemia	C0023418	disease	Neoplasms	Neoplastic Process	2111	144	0.03		1	3	0	2018	2019
FCGR3A	2214	Chronic kidney disease stage 5	C2316810	disease	Female Urogenital Diseases and Pregnancy Complications; Male Urogenital Diseases	Disease or Syndrome	666	194	0.03		1	3	0	2006	2019
FCGR3A	2214	Myeloid Leukemia, Chronic	C0023473	disease	Neoplasms; Hemic and Lymphatic Diseases	Neoplastic Process	1172	115	0.03		1	3	0	2000	2020
FCGR3A	2214	Kidney Failure, Chronic	C0022661	disease	Female Urogenital Diseases and Pregnancy Complications; Male Urogenital Diseases	Disease or Syndrome	827	425	0.03		1	3	0	2006	2019
FCGR3A	2214	Malaria	C0024530	disease	Infections	Disease or Syndrome	685	148	0.03		1	3	1	2007	2019
FCGR3A	2214	Late onset neutropenia	C3805247	disease	Hemic and Lymphatic Diseases	Disease or Syndrome	9	3	0.03		1	3	0	2010	2017
FCGR3A	2214	Pneumonitis	C3714636	disease	Infections; Respiratory Tract Diseases	Disease or Syndrome	697	13	0.03		1	3	0	2010	2018
FCGR3A	2214	MYELODYSPLASTIC SYNDROME	C3463824	group	Hemic and Lymphatic Diseases	Neoplastic Process	1033	95	0.03		1	3	0	2000	2018
FCGR3A	2214	Leukemia, Large Granular Lymphocytic	C1522378	disease	Neoplasms; Immune System Diseases; Hemic and Lymphatic Diseases	Neoplastic Process	78	0	0.03		1	3	0	1997	2010
FCGR3A	2214	Childhood Lymphoma	C1332979	disease	Neoplasms; Immune System Diseases; Hemic and Lymphatic Diseases	Neoplastic Process	1171	66	0.03		0.667	3	0	2001	2019
FCGR3A	2214	Adult Lymphoma	C1332206	disease	Neoplasms; Immune System Diseases; Hemic and Lymphatic Diseases	Neoplastic Process	1169	66	0.03		0.667	3	0	2001	2019
FCGR3A	2214	Squamous cell carcinoma of the head and neck	C1168401	disease	Neoplasms	Neoplastic Process	1543	348	0.03		1	3	0	2009	2016
FCGR3A	2214	Hepatitis B, Chronic	C0524909	disease	Digestive System Diseases; Infections	Disease or Syndrome	415	84	0.03		1	3	0	2014	2019
FCGR3A	2214	Malignant Head and Neck Neoplasm	C0278996	disease	Neoplasms	Neoplastic Process	767	118	0.03		0.667	3	0	2013	2020
FCGR3A	2214	HER2-positive carcinoma of breast	C1960398	disease	Neoplasms; Skin and Connective Tissue Diseases	Neoplastic Process	288	26	0.03		0.667	3	0	2012	2017
FCGR3A	2214	Virus Diseases	C0042769	group	Infections	Disease or Syndrome	1471	42	0.03		1	3	0	2008	2017
FCGR3A	2214	Ankylosing spondylitis	C0038013	disease	Musculoskeletal Diseases	Disease or Syndrome	710	609	0.03		1	3	0	2016	2019
FCGR3A	2214	Systemic Scleroderma	C0036421	disease	Skin and Connective Tissue Diseases	Disease or Syndrome	979	287	0.03		1	3	1	2010	2017
FCGR3A	2214	Kaposi Sarcoma	C0036220	disease	Neoplasms; Infections	Neoplastic Process	488	15	0.03		0.667	3	0	2000	2007
FCGR3A	2214	Periodontitis	C0031099	disease	Stomatognathic Diseases	Disease or Syndrome	682	116	0.03		1	3	1	2003	2013
FCGR3A	2214	Degenerative polyarthritis	C0029408	disease	Musculoskeletal Diseases	Disease or Syndrome	1827	247	0.03		1	3	0	2017	2020
FCGR3A	2214	Multiple Sclerosis	C0026769	disease	Immune System Diseases; Nervous System Diseases	Disease or Syndrome	1800	1022	0.03		1	3	0	1997	2013
FCGR3A	2214	Head and Neck Carcinoma	C3887461	disease	Neoplasms	Neoplastic Process	786	118	0.03		0.667	3	0	2013	2020
FCGR3A	2214	anaphylaxis	C0002792	phenotype	Immune System Diseases	Disease or Syndrome	180	4	0.03		1	3	0	2017	2018
FCGR3A	2214	Ulcerative Colitis	C0009324	disease	Digestive System Diseases	Disease or Syndrome	1458	827	0.03		0.333	3	0	2009	2013
FCGR3A	2214	Alzheimer's Disease	C0002395	disease	Nervous System Diseases; Mental Disorders	Disease or Syndrome	3397	1843	0.03		1	3	0	2015	2018
FCGR3A	2214	Arthritis	C0003864	disease	Musculoskeletal Diseases	Disease or Syndrome	1072	69	0.03		1	3	0	2000	2009
FCGR3A	2214	Diabetes Mellitus, Non-Insulin-Dependent	C0011860	disease	Nutritional and Metabolic Diseases; Endocrine System Diseases	Disease or Syndrome	3134	2672	0.03		1	3	0	2015	2018
FCGR3A	2214	Behcet Syndrome	C0004943	disease	Congenital, Hereditary, and Neonatal Diseases and Abnormalities; Eye Diseases; Skin and Connective Tissue Diseases; Stomatognathic Diseases; Cardiovascular Diseases	Disease or Syndrome	502	243	0.03		1	3	1	2009	2018
FCGR3A	2214	Cardiovascular Diseases	C0007222	group	Cardiovascular Diseases	Disease or Syndrome	1756	711	0.03		1	3	0	2013	2017
FCGR3A	2214	Autoimmune hemolytic anemia	C0002880	disease	Immune System Diseases; Hemic and Lymphatic Diseases	Disease or Syndrome	81	0	0.02		1	2	0	1998	2017
FCGR3A	2214	Mammary Neoplasms	C1458155	group	Neoplasms; Skin and Connective Tissue Diseases	Neoplastic Process	2780	385	0.02		1	2	0	2008	2019
FCGR3A	2214	Common Variable Immunodeficiency	C0009447	disease	Immune System Diseases	Disease or Syndrome	207	85	0.02		1	2	0	2000	2014
FCGR3A	2214	Monocytosis	C0085702	disease	Pathological Conditions, Signs and Symptoms; Hemic and Lymphatic Diseases	Disease or Syndrome	61	3	0.02		1	2	0	2018	2018
FCGR3A	2214	Polyneuropathy	C0152025	disease	Nervous System Diseases	Disease or Syndrome	156	32	0.02		1	2	0	1999	2014
FCGR3A	2214	Childhood Leukemia	C1332977	disease	Neoplasms	Neoplastic Process	1740	140	0.02		1	2	0	2018	2018
FCGR3A	2214	Encephalitis, St. Louis	C0014060	disease	Infections; Nervous System Diseases	Disease or Syndrome	272	34	0.02		0.5	2	0	2001	2018
FCGR3A	2214	Atrial Fibrillation	C0004238	disease	Pathological Conditions, Signs and Symptoms; Cardiovascular Diseases	Disease or Syndrome	939	584	0.02		1	2	0	2017	2018
FCGR3A	2214	Chronic Lymphoproliferative Disorder of NK-Cells	C1512709	disease	Pathological Conditions, Signs and Symptoms	Neoplastic Process	17	0	0.02		1	2	0	2017	2018
FCGR3A	2214	Aggressive Periodontitis	C0031106	disease	Stomatognathic Diseases	Disease or Syndrome	184	59	0.02		1	2	0	1997	2013
FCGR3A	2214	ST segment elevation myocardial infarction	C1536220	disease	Pathological Conditions, Signs and Symptoms; Cardiovascular Diseases	Disease or Syndrome	264	16	0.02		1	2	0	2017	2018
FCGR3A	2214	Acute myocardial infarction	C0155626	disease	Pathological Conditions, Signs and Symptoms; Cardiovascular Diseases	Disease or Syndrome	766	118	0.02		0.5	2	0	2017	2019
FCGR3A	2214	Vascular Diseases	C0042373	group	Cardiovascular Diseases	Disease or Syndrome	688	40	0.02		1	2	0	2018	2019
FCGR3A	2214	Diabetes Mellitus, Insulin-Dependent	C0011854	disease	Nutritional and Metabolic Diseases; Immune System Diseases; Endocrine System Diseases	Disease or Syndrome	1675	954	0.02		1	2	0	2017	2019
FCGR3A	2214	Tumor Progression	C0178874	phenotype	Pathological Conditions, Signs and Symptoms	Neoplastic Process	3865	72	0.02		1	2	0	2010	2014
FCGR3A	2214	Latent Tuberculosis	C1609538	disease	Infections	Disease or Syndrome	183	18	0.02		1	2	0	2011	2018
FCGR3A	2214	Urinary tract infection	C0042029	group	Female Urogenital Diseases and Pregnancy Complications; Infections; Male Urogenital Diseases	Disease or Syndrome	219	14	0.02		1	2	0	2004	2017
FCGR3A	2214	Pneumonia	C0032285	disease	Infections; Respiratory Tract Diseases	Disease or Syndrome	1032	33	0.02		1	2	0	2014	2018
FCGR3A	2214	Aplastic Anemia	C0002874	disease	Hemic and Lymphatic Diseases	Disease or Syndrome	238	30	0.02		1	2	0	1995	2017
FCGR3A	2214	Aortic Valve Stenosis	C0003507	disease	Cardiovascular Diseases	Disease or Syndrome	234	19	0.02		1	2	0	2017	2017
FCGR3A	2214	Aortic Aneurysm, Abdominal	C0162871	disease	Cardiovascular Diseases	Disease or Syndrome	586	90	0.02		1	2	0	2016	2019
FCGR3A	2214	Adult Hodgkin Lymphoma	C0220597	disease	Neoplasms; Immune System Diseases; Hemic and Lymphatic Diseases	Neoplastic Process	399	27	0.02		1	2	0	2010	2015
FCGR3A	2214	Adult Burkitt Lymphoma	C0278764	disease	Neoplasms; Infections; Immune System Diseases; Hemic and Lymphatic Diseases	Neoplastic Process	475	7	0.02		1	2	0	2002	2018
FCGR3A	2214	Childhood Burkitt Lymphoma	C0278879	disease	Neoplasms; Infections; Immune System Diseases; Hemic and Lymphatic Diseases	Neoplastic Process	477	7	0.02		1	2	0	2002	2018
FCGR3A	2214	Central neuroblastoma	C0700095	disease	Neoplasms; Nervous System Diseases	Neoplastic Process	2419	231	0.02		1	2	0	2010	2014
FCGR3A	2214	Colon Carcinoma	C0699790	disease	Digestive System Diseases; Neoplasms	Neoplastic Process	2832	275	0.02		1	2	0	2013	2015
FCGR3A	2214	Prostate carcinoma	C0600139	disease	Neoplasms; Male Urogenital Diseases	Neoplastic Process	4388	1168	0.02		1	2	0	2013	2013
FCGR3A	2214	Renal Cell Carcinoma	C0007134	disease	Neoplasms; Female Urogenital Diseases and Pregnancy Complications; Male Urogenital Diseases	Neoplastic Process	2084	288	0.02		1	2	0	2006	2006
FCGR3A	2214	Malignant neoplasm of pancreas	C0346647	disease	Digestive System Diseases; Neoplasms; Endocrine System Diseases	Neoplastic Process	2667	277	0.02		1	2	0	2017	2019
FCGR3A	2214	Respiratory syncytial virus (RSV) infection in conditions classified elsewhere and of unspecified site	C0375023	disease		Disease or Syndrome	467	14	0.02		1	2	0	2002	2018
FCGR3A	2214	Malignant neoplasm of prostate	C0376358	disease	Neoplasms; Male Urogenital Diseases	Neoplastic Process	4502	1082	0.02		1	2	0	2013	2013
FCGR3A	2214	Hyperactive behavior	C0424295	phenotype	Pathological Conditions, Signs and Symptoms; Nervous System Diseases	Mental or Behavioral Dysfunction	1263	112	0.02		1	2	0	2007	2017
FCGR3A	2214	Carcinoma breast stage IV	C0278488	disease		Neoplastic Process	573	14	0.02		1	2	0	2009	2019
FCGR3A	2214	Acute infectious disease	C0275518	group	Pathological Conditions, Signs and Symptoms; Infections	Disease or Syndrome	198	5	0.02		1	2	0	2011	2017
FCGR3A	2214	Conventional (Clear Cell) Renal Cell Carcinoma	C0279702	disease	Neoplasms; Female Urogenital Diseases and Pregnancy Complications; Male Urogenital Diseases	Neoplastic Process	2346	222	0.02		1	2	0	2006	2006
FCGR3A	2214	Childhood Hodgkin Lymphoma	C0220644	disease	Neoplasms; Immune System Diseases; Hemic and Lymphatic Diseases	Neoplastic Process	399	29	0.02		1	2	0	2010	2015
FCGR3A	2214	Burkitt Lymphoma	C0006413	disease	Neoplasms; Infections; Immune System Diseases; Hemic and Lymphatic Diseases	Neoplastic Process	556	13	0.02		1	2	0	2002	2018
FCGR3A	2214	Pancreatic carcinoma	C0235974	disease	Digestive System Diseases; Neoplasms; Endocrine System Diseases	Neoplastic Process	2689	322	0.02		1	2	0	2017	2019
FCGR3A	2214	Spondylarthropathies	C0949691	group	Musculoskeletal Diseases	Disease or Syndrome	92	7	0.02		1	2	0	1993	2016
FCGR3A	2214	Autoimmune thrombocytopenia	C0242584	disease	Immune System Diseases; Hemic and Lymphatic Diseases	Disease or Syndrome	115	7	0.02		1	2	0	2012	2013
FCGR3A	2214	Acute Chest Syndrome	C0742343	disease	Congenital, Hereditary, and Neonatal Diseases and Abnormalities; Respiratory Tract Diseases; Hemic and Lymphatic Diseases	Disease or Syndrome	405	135	0.02		1	2	0	2014	2017
FCGR3A	2214	Alloimmune neonatal neutropenia	C0272176	disease	Hemic and Lymphatic Diseases	Disease or Syndrome	3	0	0.02		1	2	0	1990	1991
FCGR3A	2214	Malignant tumor of colon	C0007102	disease	Digestive System Diseases; Neoplasms	Neoplastic Process	2969	688	0.02		1	2	0	2013	2015
FCGR3A	2214	Thrombocytopenia due to platelet alloimmunization	C0272286	disease	Hemic and Lymphatic Diseases	Disease or Syndrome	111	7	0.02		1	2	0	2012	2013
FCGR3A	2214	Anti-Glomerular Basement Membrane Disease	C0403529	disease	Female Urogenital Diseases and Pregnancy Complications; Male Urogenital Diseases; Respiratory Tract Diseases; Immune System Diseases	Disease or Syndrome	32	3	0.02		1	2	1	2010	2010
FCGR3A	2214	Neutropenia	C0027947	disease	Hemic and Lymphatic Diseases	Disease or Syndrome	389	97	0.02		1	2	0	1990	2010
FCGR3A	2214	Lymphopenia	C0024312	disease	Immune System Diseases; Hemic and Lymphatic Diseases	Disease or Syndrome	239	16	0.02		1	2	0	1998	2007
FCGR3A	2214	Leukemia, Myelomonocytic, Chronic	C0023480	disease	Neoplasms; Hemic and Lymphatic Diseases	Neoplastic Process	158	28	0.02		1	2	0	2018	2018
FCGR3A	2214	Leukopenia	C0023530	disease	Hemic and Lymphatic Diseases	Disease or Syndrome	440	153	0.02		1	2	0	1990	2010
FCGR3A	2214	Waldenstrom Macroglobulinemia	C0024419	disease	Neoplasms; Immune System Diseases; Hemic and Lymphatic Diseases; Cardiovascular Diseases	Neoplastic Process	162	15	0.02		1	2	0	2005	2011
FCGR3A	2214	Neuroblastoma	C0027819	disease	Neoplasms	Neoplastic Process	2509	386	0.02		1	2	0	2010	2014
FCGR3A	2214	Malaria, Falciparum	C0024535	disease	Infections	Disease or Syndrome	158	19	0.02		1	2	0	2007	2017
FCGR3A	2214	Miscarriage	C4552766	disease	Female Urogenital Diseases and Pregnancy Complications	Disease or Syndrome	426	56	0.02		1	2	0	2002	2019
FCGR3A	2214	Guillain-Barre Syndrome	C0018378	disease	Immune System Diseases; Nervous System Diseases	Disease or Syndrome	163	13	0.02		0.5	2	1	2016	2018
FCGR3A	2214	Liver Cirrhosis	C0023890	disease	Pathological Conditions, Signs and Symptoms; Digestive System Diseases	Disease or Syndrome	1182	189	0.02		1	2	0	2017	2018
FCGR3A	2214	Multiple Myeloma	C0026764	disease	Neoplasms; Immune System Diseases; Hemic and Lymphatic Diseases; Cardiovascular Diseases	Neoplastic Process	1740	865	0.02		1	2	0	2015	2019
FCGR3A	2214	Amyotrophic Lateral Sclerosis	C0002736	disease	Nutritional and Metabolic Diseases; Nervous System Diseases	Disease or Syndrome	1114	485	0.02		1	2	0	2012	2017
FCGR3A	2214	Huntington Disease	C0020179	disease	Congenital, Hereditary, and Neonatal Diseases and Abnormalities; Nervous System Diseases; Mental Disorders	Disease or Syndrome	978	115	0.02		1	2	0	2011	2018
FCGR3A	2214	melanoma	C0025202	disease	Neoplasms	Neoplastic Process	3087	515	0.02		1	2	0	2011	2012
FCGR3A	2214	Childhood Neuroblastoma	C4086165	disease	Neoplasms	Neoplastic Process	2420	231	0.02		1	2	0	2010	2014
FCGR3A	2214	Acquired Immunodeficiency Syndrome	C0001175	group	Infections; Immune System Diseases	Disease or Syndrome	243	42	0.02		1	2	0	1991	2005
FCGR3A	2214	Autoimmune disease (systemic) NOS	C2895206	disease		Disease or Syndrome	37	3	0.02		1	2	0	2002	2012
FCGR3A	2214	Parkinson Disease	C0030567	disease	Nervous System Diseases	Disease or Syndrome	2078	990	0.02		1	2	0	2017	2017
FCGR3A	2214	Malignant neoplasm of colon and/or rectum	C4722085	disease		Neoplastic Process	3669	502	0.02		1	2	0	2012	2014
FCGR3A	2214	Granulomatosis with polyangiitis	C3495801	disease	Respiratory Tract Diseases; Immune System Diseases; Cardiovascular Diseases	Disease or Syndrome	126	18	0.02		0.5	2	0	1999	2016
FCGR3A	2214	Herpesviridae Infections	C0019372	group	Infections	Disease or Syndrome	62	3	0.02		1	2	1	2005	2012
FCGR3A	2214	HIV Coinfection	C4505456	disease	Infections; Immune System Diseases	Disease or Syndrome	129	3	0.01		1	1	0	2009	2009
FCGR3A	2214	Metastatic human epidermal growth factor 2 positive carcinoma of breast	C4721209	disease	Neoplasms; Skin and Connective Tissue Diseases	Neoplastic Process	42	0	0.01		1	1	0	2012	2012
FCGR3A	2214	Adenocarcinoma of prostate	C0007112	disease	Neoplasms; Male Urogenital Diseases	Neoplastic Process	342	108	0.01		1	1	0	2013	2013
FCGR3A	2214	Alloimmunisation	C0948201	disease		Disease or Syndrome	65	3	0.01		1	1	0	1992	1992
FCGR3A	2214	Spondylarthritis	C0949690	disease	Musculoskeletal Diseases	Disease or Syndrome	158	23	0.01		1	1	0	2016	2016
FCGR3A	2214	Malignant neoplasm of soft tissue	C4551686	group	Neoplasms	Neoplastic Process	699	32	0.01		1	1	0	2017	2017
FCGR3A	2214	Ischemic stroke	C0948008	disease	Nervous System Diseases; Cardiovascular Diseases	Disease or Syndrome	1159	704	0.01		1	1	0	2018	2018
FCGR3A	2214	Carcinoma	C0007097	group	Neoplasms	Neoplastic Process	2462	103	0.01		1	1	0	2012	2012
FCGR3A	2214	Complete Trisomy 21 Syndrome	C4521042	disease	Pathological Conditions, Signs and Symptoms; Congenital, Hereditary, and Neonatal Diseases and Abnormalities; Nervous System Diseases	Disease or Syndrome	669	77	0.01		1	1	0	1992	1992
FCGR3A	2214	Chronic infection with HIV	C0853112	disease		Disease or Syndrome	48	0	0.01		1	1	0	2011	2011
FCGR3A	2214	Immunodeficiency congenital	C0853602	disease		Disease or Syndrome; Congenital Abnormality	8	0	0.01		1	1	0	2012	2012
FCGR3A	2214	Recurrent Chronic Lymphoid Leukemia	C0854802	disease	Neoplasms; Immune System Diseases; Hemic and Lymphatic Diseases	Neoplastic Process	12	0	0.01		1	1	0	2005	2005
FCGR3A	2214	Addison Disease	C0001403	disease	Immune System Diseases; Endocrine System Diseases	Disease or Syndrome	111	13	0.01		1	1	0	2007	2007
FCGR3A	2214	pathergy	C0878631	disease		Disease or Syndrome	6	1	0.01		1	1	0	2009	2009
FCGR3A	2214	Congenital atresia of extrahepatic bile duct	C4520983	disease	Congenital, Hereditary, and Neonatal Diseases and Abnormalities; Digestive System Diseases	Congenital Abnormality	172	19	0.01		1	1	0	2013	2013
FCGR3A	2214	Multiple Sclerosis, Relapsing-Remitting	C0751967	disease	Immune System Diseases; Nervous System Diseases	Disease or Syndrome	206	7	0.01		1	1	0	2019	2019
FCGR3A	2214	Mantle cell lymphoma	C4721414	disease	Neoplasms; Immune System Diseases; Hemic and Lymphatic Diseases	Neoplastic Process	466	19	0.01		1	1	0	2007	2007
FCGR3A	2214	Hepatitis C, Chronic	C0524910	disease	Digestive System Diseases; Infections	Disease or Syndrome	430	80	0.01		1	1	0	2008	2008
FCGR3A	2214	Squamous cell carcinoma	C0007137	disease	Neoplasms	Neoplastic Process	2507	257	0.01		1	1	0	2013	2013
FCGR3A	2214	Neuropathy	C0442874	group	Nervous System Diseases	Disease or Syndrome	484	110	0.01		1	1	0	2014	2014
FCGR3A	2214	Postoperative delirium	C4721772	phenotype	Pathological Conditions, Signs and Symptoms; Nervous System Diseases; Mental Disorders; Behavior and Behavior Mechanisms	Mental or Behavioral Dysfunction	42	0	0.01		1	1	0	2017	2017
FCGR3A	2214	Post-transplant lymphoproliferative disorder	C0432487	disease	Infections; Immune System Diseases; Hemic and Lymphatic Diseases	Neoplastic Process	22	2	0.01		1	1	0	2014	2014
FCGR3A	2214	Triple-Negative Breast Carcinoma	C4722518	disease	Neoplasms; Skin and Connective Tissue Diseases	Neoplastic Process	1598	96	0.01		1	1	0	2020	2020
FCGR3A	2214	Chronic Infantile Neurological, Cutaneous, and Articular Syndrome	C0409818	disease	Congenital, Hereditary, and Neonatal Diseases and Abnormalities; Skin and Connective Tissue Diseases	Disease or Syndrome	30	22	0.01		1	1	0	2015	2015
FCGR3A	2214	Advanced Melanoma	C4727838	disease		Neoplastic Process	73	5	0.01		1	1	0	2018	2018
FCGR3A	2214	Complicated malaria	C2747816	disease	Infections	Disease or Syndrome	166	38	0.01		1	1	0	2017	2017
FCGR3A	2214	Progressive Neoplastic Disease	C0677932	phenotype		Neoplastic Process	384	40	0.01		1	1	0	2008	2008
FCGR3A	2214	Non-Small Cell Lung Carcinoma	C0007131	disease	Neoplasms; Respiratory Tract Diseases	Neoplastic Process	3926	712	0.01		1	1	0	2013	2013
FCGR3A	2214	Idiopathic Inflammatory Myopathies	C0751356	disease	Musculoskeletal Diseases; Nervous System Diseases	Disease or Syndrome	106	4	0.01		1	1	0	2009	2009
FCGR3A	2214	Acute periodontitis	C0001342	disease	Stomatognathic Diseases	Disease or Syndrome	130	49	0.01		1	1	0	2013	2013
FCGR3A	2214	Apraxia, Developmental Verbal	C0750927	disease	Pathological Conditions, Signs and Symptoms; Nervous System Diseases; Behavior and Behavior Mechanisms	Mental or Behavioral Dysfunction	80	21	0.01		1	1	0	2019	2019
FCGR3A	2214	early pregnancy	C0747845	phenotype		Disease or Syndrome	273	8	0.01		1	1	0	1999	1999
FCGR3A	2214	Merkel cell carcinoma	C0007129	disease	Neoplasms; Infections	Neoplastic Process	226	10	0.01		1	1	0	2012	2012
FCGR3A	2214	Eczema Herpeticum	C0936250	disease	Infections; Skin and Connective Tissue Diseases	Disease or Syndrome	21	4	0.01		1	1	0	2014	2014
FCGR3A	2214	Varicella zoster	C0740380	disease		Disease or Syndrome	71	2	0.01		1	1	0	2014	2014
FCGR3A	2214	Acute pancreatitis	C0001339	disease	Digestive System Diseases	Disease or Syndrome	435	51	0.01		1	1	0	2004	2004
FCGR3A	2214	Idiopathic crescentic glomerulonephritis	C0403416	disease	Female Urogenital Diseases and Pregnancy Complications; Male Urogenital Diseases	Disease or Syndrome	80	0	0.01		1	1	0	2012	2012
FCGR3A	2214	Non-ST Elevated Myocardial Infarction	C4255010	disease	Pathological Conditions, Signs and Symptoms; Cardiovascular Diseases	Disease or Syndrome	85	2	0.01		1	1	0	2017	2017
FCGR3A	2214	Allergic rhinitis (disorder)	C2607914	disease	Respiratory Tract Diseases; Immune System Diseases; Otorhinolaryngologic Diseases	Disease or Syndrome	446	176	0.01		1	1	0	2008	2008
FCGR3A	2214	CATARACT, ANTERIOR POLAR	C1855179	disease	Eye Diseases	Disease or Syndrome	125	27	0.01		1	1	0	2020	2020
FCGR3A	2214	MYELOPROLIFERATIVE DISORDER, CHRONIC, WITH EOSINOPHILIA	C1851585	disease	Hemic and Lymphatic Diseases	Disease or Syndrome	119	5	0.01		1	1	0	2019	2019
FCGR3A	2214	DOSAGE-SENSITIVE SEX REVERSAL	C1848296	disease	Congenital, Hereditary, and Neonatal Diseases and Abnormalities; Female Urogenital Diseases and Pregnancy Complications; Male Urogenital Diseases; Endocrine System Diseases	Disease or Syndrome	159	12	0.01		1	1	0	2017	2017
FCGR3A	2214	IMMUNE SUPPRESSION	C1840264	phenotype		Disease or Syndrome	222	3	0.01		1	1	0	2018	2018
FCGR3A	2214	THROMBOCYTOPENIA 1 (disorder)	C1839163	disease	Congenital, Hereditary, and Neonatal Diseases and Abnormalities; Hemic and Lymphatic Diseases	Disease or Syndrome	30	18	0.01		1	1	0	2004	2004
FCGR3A	2214	ANOPHTHALMIA AND PULMONARY HYPOPLASIA	C1832661	disease	Congenital, Hereditary, and Neonatal Diseases and Abnormalities; Eye Diseases; Respiratory Tract Diseases	Disease or Syndrome	1410	80	0.01		1	1	0	2019	2019
FCGR3A	2214	Nephrotic Syndrome, Minimal Change	C1704321	disease	Female Urogenital Diseases and Pregnancy Complications; Male Urogenital Diseases	Disease or Syndrome	85	10	0.01		1	1	0	2018	2018
FCGR3A	2214	Cirrhosis	C1623038	disease	Pathological Conditions, Signs and Symptoms	Disease or Syndrome	919	110	0.01		1	1	0	2018	2018
FCGR3A	2214	Progressive cGVHD	C3539781	disease		Disease or Syndrome	384	40	0.01		1	1	0	2008	2008
FCGR3A	2214	Venous Thromboembolism	C1861172	phenotype	Cardiovascular Diseases	Disease or Syndrome	378	408	0.01		1	1	0	2019	2019
FCGR3A	2214	SVEINSSON CHORIORETINAL ATROPHY	C1862382	disease	Congenital, Hereditary, and Neonatal Diseases and Abnormalities; Eye Diseases	Disease or Syndrome	139	30	0.01		1	1	0	2013	2013
FCGR3A	2214	Chronic thromboembolic pulmonary hypertension	C2363973	disease	Respiratory Tract Diseases; Cardiovascular Diseases	Disease or Syndrome	76	4	0.01		1	1	0	2012	2012
FCGR3A	2214	Acute malaria	C2930826	disease	Infections	Disease or Syndrome	7	1	0.01		1	1	0	2012	2012
FCGR3A	2214	Mechanical Allodynia	C2936719	phenotype	Pathological Conditions, Signs and Symptoms; Nervous System Diseases	Sign or Symptom	408	4	0.01		1	1	0	2018	2018
FCGR3A	2214	Anemia, Hemolytic	C0002878	disease	Hemic and Lymphatic Diseases	Disease or Syndrome	154	31	0.01		1	1	0	2001	2001
FCGR3A	2214	Anemia	C0002871	disease	Hemic and Lymphatic Diseases	Disease or Syndrome	847	94	0.01		1	1	0	2012	2012
FCGR3A	2214	Influenza A	C2062441	disease		Disease or Syndrome	563	19	0.01		1	1	0	2017	2017
FCGR3A	2214	Anemia, Sickle Cell	C0002895	disease	Congenital, Hereditary, and Neonatal Diseases and Abnormalities; Hemic and Lymphatic Diseases	Disease or Syndrome	434	138	0.01		1	1	0	2019	2019
FCGR3A	2214	Idiopathic Nephrotic Syndrome	C3496337	disease	Female Urogenital Diseases and Pregnancy Complications; Male Urogenital Diseases	Disease or Syndrome	51	72	0.01		1	1	0	2018	2018
FCGR3A	2214	B-CELL MALIGNANCY, LOW-GRADE	C1868683	disease		Neoplastic Process	350	19	0.01		1	1	0	1995	1995
FCGR3A	2214	Triple Negative Breast Neoplasms	C3539878	disease	Neoplasms; Skin and Connective Tissue Diseases	Neoplastic Process	1674	99	0.01		1	1	0	2020	2020
FCGR3A	2214	Intestinal fibrosis	C3544347	phenotype		Anatomical Abnormality	65	0	0.01		1	1	0	2018	2018
FCGR3A	2214	Low Grade Squamous Intraepithelial Neoplasia	C1302773	disease	Pathological Conditions, Signs and Symptoms; Neoplasms; Female Urogenital Diseases and Pregnancy Complications	Neoplastic Process	94	2	0.01		1	1	1	2010	2010
FCGR3A	2214	Aggressive natural killer-cell leukemia	C1292777	disease	Neoplasms; Immune System Diseases; Hemic and Lymphatic Diseases	Neoplastic Process	30	0	0.01		1	1	0	2004	2004
FCGR3A	2214	Tumor Necrosis Factor Receptor 1-Associated Periodic Syndrome	C3889136	disease		Disease or Syndrome	25	8	0.01		1	1	0	2007	2007
FCGR3A	2214	Obstructive Ureterocele	C4049883	disease	Female Urogenital Diseases and Pregnancy Complications; Male Urogenital Diseases	Disease or Syndrome	25	0	0.01		1	1	0	2018	2018
FCGR3A	2214	Pauci-immune Glomerulonephritis associated with Granulomatosis with Polyangiitis	C4050407	disease	Female Urogenital Diseases and Pregnancy Complications; Male Urogenital Diseases	Disease or Syndrome	71	15	0.01		1	1	0	1999	1999
FCGR3A	2214	TNF receptor-associated periodic fever syndrome (TRAPS)	C1275126	disease	Pathological Conditions, Signs and Symptoms; Congenital, Hereditary, and Neonatal Diseases and Abnormalities; Skin and Connective Tissue Diseases	Disease or Syndrome	90	33	0.01		1	1	0	2007	2007
FCGR3A	2214	Tumor Cell Invasion	C1269955	phenotype		Neoplastic Process	6626	169	0.01		1	1	0	2019	2019
FCGR3A	2214	Sarcoma	C1261473	group	Neoplasms	Neoplastic Process	853	42	0.01		1	1	0	2017	2017
FCGR3A	2214	Skin toxicity	C1167791	disease		Disease or Syndrome	62	24	0.01		1	1	1	2010	2010
FCGR3A	2214	Biliary Atresia	C0005411	disease	Congenital, Hereditary, and Neonatal Diseases and Abnormalities; Digestive System Diseases	Congenital Abnormality	184	32	0.01		1	1	0	2013	2013
FCGR3A	2214	Immune Reconstitution Inflammatory Syndrome	C1619738	disease	Immune System Diseases	Disease or Syndrome	33	5	0.01		1	1	0	2014	2014
FCGR3A	2214	Infection	C3714514	group	Infections	Pathologic Function	491	0	0.01		1	1	0	2008	2008
FCGR3A	2214	HER2-negative breast cancer	C4733095	disease		Neoplastic Process	160	18	0.01		1	1	0	2016	2016
FCGR3A	2214	Diabetes Mellitus, Ketosis-Prone	C3837958	disease	Nutritional and Metabolic Diseases; Immune System Diseases; Endocrine System Diseases	Disease or Syndrome	57	4	0.01		1	1	0	2013	2013
FCGR3A	2214	Adenocarcinoma	C0001418	group	Neoplasms	Neoplastic Process	2235	168	0.01		1	1	0	2013	2013
FCGR3A	2214	Metastatic Carcinoma	C1384494	group	Pathological Conditions, Signs and Symptoms; Neoplasms	Neoplastic Process	57	2	0.01		1	1	0	2013	2013
FCGR3A	2214	Indolent Non-Hodgkin Lymphoma	C1334170	disease		Neoplastic Process	27	0	0.01		1	1	0	2007	2007
FCGR3A	2214	Arthritis, Psoriatic	C0003872	disease	Skin and Connective Tissue Diseases; Musculoskeletal Diseases	Disease or Syndrome	450	89	0.01		1	1	0	2012	2012
FCGR3A	2214	Deuteranomaly	C3887938	disease	Pathological Conditions, Signs and Symptoms; Eye Diseases; Nervous System Diseases	Disease or Syndrome	92	10	0.01		1	1	0	2019	2019
FCGR3A	2214	Fistulising Crohn's disease	C3888864	disease		Disease or Syndrome	7	0	0.01		1	1	0	2006	2006
FCGR3A	2214	Monoclonal Gammapathies	C1136085	group	Immune System Diseases; Hemic and Lymphatic Diseases	Neoplastic Process	62	2	0.01		1	1	0	2014	2014
FCGR3A	2214	Cytomegalovirus Infections	C0010823	group	Infections	Disease or Syndrome	462	26	0.01		1	1	0	2018	2018
FCGR3A	2214	Pleural effusion disorder	C0032227	group	Respiratory Tract Diseases	Disease or Syndrome	227	14	0.01		1	1	0	2015	2015
FCGR3A	2214	Periodontal Diseases	C0031090	group	Stomatognathic Diseases	Disease or Syndrome	326	22	0.01		0	1	0	2010	2010
FCGR3A	2214	Periapical Periodontitis	C0031030	disease	Stomatognathic Diseases	Disease or Syndrome	90	5	0.01		1	1	0	2011	2011
FCGR3A	2214	Bullous pemphigoid	C0030805	disease	Skin and Connective Tissue Diseases; Immune System Diseases	Disease or Syndrome	127	11	0.01		1	1	0	2007	2007
FCGR3A	2214	Parasitic Diseases	C0030499	group	Infections	Disease or Syndrome	164	2	0.01		0	1	0	2019	2019
FCGR3A	2214	Osteopenia	C0029453	disease	Nutritional and Metabolic Diseases; Musculoskeletal Diseases	Disease or Syndrome	845	61	0.01		1	1	0	2001	2001
FCGR3A	2214	Endometriosis	C0014175	disease	Female Urogenital Diseases and Pregnancy Complications	Disease or Syndrome	1188	274	0.01		1	1	0	2018	2018
FCGR3A	2214	Obsessive-Compulsive Disorder	C0028768	disease	Mental Disorders	Mental or Behavioral Dysfunction	175	112	0.01		1	1	0	2017	2017
FCGR3A	2214	Obesity	C0028754	disease	Pathological Conditions, Signs and Symptoms; Nutritional and Metabolic Diseases	Disease or Syndrome	2821	1111	0.01		1	1	0	2017	2017
FCGR3A	2214	Neuromyelitis Optica	C0027873	disease	Eye Diseases; Immune System Diseases; Nervous System Diseases	Disease or Syndrome	171	45	0.01		1	1	0	2015	2015
FCGR3A	2214	Epidermodysplasia Verruciformis	C0014522	disease	Infections; Skin and Connective Tissue Diseases	Neoplastic Process	64	9	0.01		1	1	0	1993	1993
FCGR3A	2214	Gastritis	C0017152	disease	Digestive System Diseases	Disease or Syndrome	292	21	0.01		1	1	0	2012	2012
FCGR3A	2214	Poliomyelitis	C0032371	disease	Infections; Nervous System Diseases	Disease or Syndrome	23	0	0.01		1	1	0	2002	2002
FCGR3A	2214	Down Syndrome	C0013080	disease	Congenital, Hereditary, and Neonatal Diseases and Abnormalities; Nervous System Diseases	Disease or Syndrome	766	80	0.01		1	1	0	1992	1992
FCGR3A	2214	Giant Cell Arteritis	C0039483	disease	Skin and Connective Tissue Diseases; Immune System Diseases; Nervous System Diseases; Cardiovascular Diseases	Disease or Syndrome	260	78	0.01		1	1	0	2006	2006
FCGR3A	2214	Dejerine-Sottas Disease (disorder)	C0011195	disease	Congenital, Hereditary, and Neonatal Diseases and Abnormalities; Nervous System Diseases	Disease or Syndrome	176	45	0.01		1	1	0	2017	2017
FCGR3A	2214	Subarachnoid Hemorrhage	C0038525	disease	Pathological Conditions, Signs and Symptoms; Nervous System Diseases; Cardiovascular Diseases	Disease or Syndrome	501	26	0.01		1	1	0	2017	2017
FCGR3A	2214	Delirium	C0011206	disease	Pathological Conditions, Signs and Symptoms; Nervous System Diseases; Mental Disorders; Behavior and Behavior Mechanisms	Mental or Behavioral Dysfunction	110	7	0.01		1	1	0	2017	2017
FCGR3A	2214	Skin lesion	C0037284	group	Skin and Connective Tissue Diseases	Disease or Syndrome	563	52	0.01		1	1	0	2014	2014
FCGR3A	2214	Situs Inversus	C0037221	disease	Congenital, Hereditary, and Neonatal Diseases and Abnormalities	Congenital Abnormality	138	6	0.01		0	1	0	2019	2019
FCGR3A	2214	Dengue Fever	C0011311	disease	Infections	Disease or Syndrome	360	39	0.01		1	1	0	2017	2017
FCGR3A	2214	Septicaemia due to gram-negative organism, unspecified	C0036685	group	Pathological Conditions, Signs and Symptoms; Infections	Disease or Syndrome	33	2	0.01		1	1	0	2013	2013
FCGR3A	2214	Dermatomyositis	C0011633	disease	Skin and Connective Tissue Diseases; Musculoskeletal Diseases; Nervous System Diseases	Disease or Syndrome	235	34	0.01		1	1	0	2009	2009
FCGR3A	2214	Rheumatism	C0035435	disease	Skin and Connective Tissue Diseases; Musculoskeletal Diseases	Disease or Syndrome	197	19	0.01		1	1	0	2012	2012
FCGR3A	2214	Respiratory Syncytial Virus Infections	C0035235	group	Infections	Disease or Syndrome	244	5	0.01		1	1	0	2002	2002
FCGR3A	2214	Pulmonary Fibrosis	C0034069	disease	Respiratory Tract Diseases	Disease or Syndrome	924	25	0.01		1	1	0	2017	2017
FCGR3A	2214	Neoplasm Metastasis	C0027627	phenotype	Pathological Conditions, Signs and Symptoms; Neoplasms	Neoplastic Process	6385	327	0.01		1	1	0	2019	2019
FCGR3A	2214	Myocardial Infarction	C0027051	disease	Pathological Conditions, Signs and Symptoms; Cardiovascular Diseases	Disease or Syndrome	1800	680	0.01		1	1	0	2015	2015
FCGR3A	2214	Severe Dengue	C0019100	disease	Infections	Disease or Syndrome	117	25	0.01		1	1	0	2017	2017
FCGR3A	2214	Hepatitis	C0019158	group	Digestive System Diseases	Disease or Syndrome	656	42	0.01		1	1	0	2018	2018
FCGR3A	2214	Hepatitis B	C0019163	disease	Digestive System Diseases; Infections	Disease or Syndrome	1449	519	0.01		1	1	0	2007	2007
FCGR3A	2214	Hepatitis, Chronic	C0019189	disease	Digestive System Diseases	Disease or Syndrome	224	10	0.01		1	1	0	2013	2013
FCGR3A	2214	Lown-Ganong-Levine Syndrome	C0024054	disease	Cardiovascular Diseases	Disease or Syndrome	9	0	0.01		1	1	0	2009	2009
FCGR3A	2214	Herpes Simplex Infections	C0019348	group	Infections; Skin and Connective Tissue Diseases	Disease or Syndrome	645	11	0.01		1	1	0	2017	2017
FCGR3A	2214	Adult T-Cell Lymphoma/Leukemia	C0023493	disease	Neoplasms; Immune System Diseases; Hemic and Lymphatic Diseases	Neoplastic Process	540	11	0.01		1	1	0	2016	2016
FCGR3A	2214	Leukemia, T-Cell	C0023492	disease	Neoplasms; Immune System Diseases; Hemic and Lymphatic Diseases	Neoplastic Process	457	10	0.01		1	1	0	2016	2016
FCGR3A	2214	Acute monocytic leukemia	C0023465	disease	Neoplasms	Neoplastic Process	633	22	0.01		1	1	0	2018	2018
FCGR3A	2214	Hyperlipidemia	C0020473	disease	Nutritional and Metabolic Diseases	Disease or Syndrome	472	83	0.01		1	1	0	2017	2017
FCGR3A	2214	leiomyosarcoma	C0023269	disease	Neoplasms	Neoplastic Process	213	5	0.01		1	1	0	2017	2017
FCGR3A	2214	Immune System Diseases	C0021053	group	Immune System Diseases	Disease or Syndrome	451	116	0.01		1	1	0	2016	2016
FCGR3A	2214	Graves Disease	C0018213	disease	Eye Diseases; Immune System Diseases; Endocrine System Diseases	Disease or Syndrome	585	352	0.01		1	1	0	2015	2015
FCGR3A	2214	Graft-vs-Host Disease	C0018133	disease	Immune System Diseases	Disease or Syndrome	447	25	0.01		1	1	0	2014	2014
FCGR3A	2214	Gaucher Disease	C0017205	disease	Congenital, Hereditary, and Neonatal Diseases and Abnormalities; Nutritional and Metabolic Diseases; Nervous System Diseases	Disease or Syndrome	143	82	0.01		1	1	0	2015	2015
FCGR3A	2214	Monoclonal Gammopathy of Undetermined Significance	C0026470	disease	Immune System Diseases; Hemic and Lymphatic Diseases	Neoplastic Process	227	20	0.01		1	1	0	2014	2014
FCGR3A	2214	Meningitis	C0025289	disease	Nervous System Diseases	Disease or Syndrome	191	13	0.01		1	1	0	2001	2001
FCGR3A	2214	Meningioma	C0025286	disease	Neoplasms; Nervous System Diseases	Neoplastic Process	634	43	0.01		1	1	0	2013	2013
FCGR3A	2214	Meniere Disease	C0025281	disease	Otorhinolaryngologic Diseases	Disease or Syndrome	69	36	0.01		1	1	1	2011	2011
FCGR3A	2214	Marijuana Abuse	C0024809	disease	Chemically-Induced Disorders; Mental Disorders	Mental or Behavioral Dysfunction	156	23	0.01		1	1	0	2018	2018
FCGR3A	2214	Glomerulitis (disorder)	C0017657	disease	Pathological Conditions, Signs and Symptoms; Female Urogenital Diseases and Pregnancy Complications; Male Urogenital Diseases	Disease or Syndrome	8	1	0.01		1	1	0	2017	2017
FCGR3A	2214	Glomerulonephritis	C0017658	disease	Female Urogenital Diseases and Pregnancy Complications; Male Urogenital Diseases	Disease or Syndrome	391	7	0.01		1	1	0	2006	2006
FCGR3A	2214	Lymphoproliferative Disorders	C0024314	group	Immune System Diseases; Hemic and Lymphatic Diseases	Neoplastic Process	300	14	0.01		1	1	0	1992	1992
FCGR3A	2214	Lymphomatoid Granulomatosis	C0024307	disease	Neoplasms; Immune System Diseases; Hemic and Lymphatic Diseases	Neoplastic Process	11	1	0.01		0	1	0	1995	1995
FCGR3A	2214	Lymphoma, Undifferentiated	C0024306	disease	Neoplasms; Immune System Diseases; Hemic and Lymphatic Diseases	Neoplastic Process	25	0	0.01		1	1	0	2002	2002
FCGR3A	2214	Glycogen storage disease type II	C0017921	disease	Congenital, Hereditary, and Neonatal Diseases and Abnormalities; Nutritional and Metabolic Diseases; Nervous System Diseases	Disease or Syndrome	194	269	0.01		1	1	0	2012	2012
FCGR3A	2214	Inflammation	C0021368	phenotype	Pathological Conditions, Signs and Symptoms	Pathologic Function	467	0	0.01		1	1	0	2007	2007
FCGR3A	2214	Cystic Fibrosis	C0010674	disease	Congenital, Hereditary, and Neonatal Diseases and Abnormalities; Digestive System Diseases; Respiratory Tract Diseases	Disease or Syndrome	852	704	0.01		1	1	0	2014	2014
FCGR3A	2214	Non-alcoholic Fatty Liver Disease	C0400966	disease	Digestive System Diseases	Disease or Syndrome	1058	222	0.01		1	1	0	2016	2016
FCGR3A	2214	Cervix carcinoma	C0302592	disease	Neoplasms; Female Urogenital Diseases and Pregnancy Complications	Neoplastic Process	1881	283	0.01		1	1	0	2010	2010
FCGR3A	2214	Erythrophagocytosis	C0302486	disease		Disease or Syndrome	40	0	0.01		1	1	0	2016	2016
FCGR3A	2214	Collagen Diseases	C0009326	group	Skin and Connective Tissue Diseases	Disease or Syndrome	63	10	0.01		1	1	0	2012	2012
FCGR3A	2214	Kaposi's sarcoma classical type	C0279084	disease	Neoplasms; Infections	Neoplastic Process	26	3	0.01		1	1	0	2005	2005
FCGR3A	2214	Cholera	C0008354	disease	Infections	Disease or Syndrome	209	1	0.01		1	1	0	2017	2017
FCGR3A	2214	Recurrent ovarian cancer	C0278689	disease	Neoplasms; Female Urogenital Diseases and Pregnancy Complications; Endocrine System Diseases	Neoplastic Process	71	1	0.01		1	1	0	2017	2017
FCGR3A	2214	Zika Virus Infection	C0276289	disease	Infections	Disease or Syndrome	192	1	0.01		1	1	0	2018	2018
FCGR3A	2214	Coinfection	C0275524	phenotype	Infections	Disease or Syndrome	252	11	0.01		1	1	0	2013	2013
FCGR3A	2214	Heparin-induced thrombocytopenia	C0272285	disease	Hemic and Lymphatic Diseases	Disease or Syndrome	44	5	0.01		1	1	0	2016	2016
FCGR3A	2214	Drug-induced neutropenia	C0272178	disease	Hemic and Lymphatic Diseases	Disease or Syndrome	41	54	0.01		0	1	0	2005	2005
FCGR3A	2214	Immune neutropenia	C0272175	disease	Hemic and Lymphatic Diseases	Disease or Syndrome	3	0	0.01		1	1	0	1990	1990
FCGR3A	2214	Impaired glucose tolerance	C0271650	phenotype	Nutritional and Metabolic Diseases	Disease or Syndrome	596	81	0.01		1	1	0	2015	2015
FCGR3A	2214	Tumor necrosis	C0333516	phenotype	Pathological Conditions, Signs and Symptoms	Neoplastic Process	350	1	0.01		1	1	0	2015	2015
FCGR3A	2214	High-Grade Squamous Intraepithelial Lesions	C0333875	phenotype	Pathological Conditions, Signs and Symptoms; Neoplasms; Female Urogenital Diseases and Pregnancy Complications	Neoplastic Process	150	8	0.01		1	1	1	2010	2010
FCGR3A	2214	Early onset periodontitis	C0399447	disease	Stomatognathic Diseases	Disease or Syndrome	21	0	0.01		1	1	0	1997	1997
FCGR3A	2214	Hypopigmentation-immunodeficiency disease	C0398794	disease	Pathological Conditions, Signs and Symptoms; Congenital, Hereditary, and Neonatal Diseases and Abnormalities; Nutritional and Metabolic Diseases; Eye Diseases; Skin and Connective Tissue Diseases; Nervous System Diseases; Mental Disorders; Behavior and Behavior Mechanisms	Disease or Syndrome	14	3	0.01		1	1	0	2007	2007
FCGR3A	2214	Carotid Stenosis	C0007282	disease	Nervous System Diseases; Cardiovascular Diseases	Disease or Syndrome	135	19	0.01		1	1	0	2019	2019
FCGR3A	2214	Nasal Type Extranodal NK/T-Cell Lymphoma	C0392788	disease	Neoplasms	Neoplastic Process	53	0	0.01		1	1	0	2015	2015
FCGR3A	2214	Hematologic Neoplasms	C0376545	group	Neoplasms; Hemic and Lymphatic Diseases	Neoplastic Process	827	60	0.01		1	1	0	2019	2019
FCGR3A	2214	Helicobacter pylori (H. pylori) infection in conditions classified elsewhere and of unspecified site	C0374997	disease		Disease or Syndrome	593	24	0.01		1	1	0	2012	2012
FCGR3A	2214	Aplastic anemia, idiopathic	C0348890	disease	Hemic and Lymphatic Diseases	Disease or Syndrome	13	0	0.01		1	1	0	1997	1997
FCGR3A	2214	Acute HIV infection	C0343752	disease	Infections; Immune System Diseases	Disease or Syndrome	48	0	0.01		1	1	0	2011	2011
FCGR3A	2214	MRSA - Methicillin resistant Staphylococcus aureus infection	C0343401	disease	Infections	Disease or Syndrome	222	1	0.01		1	1	0	2016	2016
FCGR3A	2214	Autoimmune neutropenia	C0340971	disease	Immune System Diseases; Hemic and Lymphatic Diseases	Disease or Syndrome	8	0	0.01		1	1	0	2019	2019
FCGR3A	2214	Acute exacerbation of chronic obstructive airways disease	C0340044	phenotype	Respiratory Tract Diseases	Disease or Syndrome	63	1	0.01		1	1	0	2020	2020
FCGR3A	2214	Malignant lymphoma, lymphocytic, intermediate differentiation, diffuse	C0334634	disease	Neoplasms; Immune System Diseases; Hemic and Lymphatic Diseases	Neoplastic Process	296	9	0.01		1	1	0	2007	2007
FCGR3A	2214	Vesicular Stomatitis	C0266999	disease	Infections; Stomatognathic Diseases; Animal Diseases	Disease or Syndrome	112	0	0.01		1	1	0	2007	2007
FCGR3A	2214	Chordoma	C0008487	disease	Neoplasms	Neoplastic Process	140	3	0.01		1	1	0	2018	2018
FCGR3A	2214	Liver Failure, Acute	C0162557	disease	Digestive System Diseases	Disease or Syndrome	282	21	0.01		1	1	0	2012	2012
FCGR3A	2214	Malnutrition	C0162429	disease	Nutritional and Metabolic Diseases	Disease or Syndrome	417	29	0.01		1	1	0	2018	2018
FCGR3A	2214	Colorectal Neoplasms	C0009404	group	Digestive System Diseases; Neoplasms	Neoplastic Process	1296	609	0.01		1	1	0	2009	2009
FCGR3A	2214	Complete atrioventricular block	C0151517	disease	Pathological Conditions, Signs and Symptoms; Cardiovascular Diseases	Disease or Syndrome	403	96	0.01		1	1	0	2014	2014
FCGR3A	2214	Idiopathic Membranous Glomerulonephritis	C0086445	disease	Female Urogenital Diseases and Pregnancy Complications; Male Urogenital Diseases; Immune System Diseases	Disease or Syndrome	79	13	0.01		1	1	0	2014	2014
FCGR3A	2214	Polyglandular Type I Autoimmune Syndrome	C0085859	disease	Immune System Diseases; Endocrine System Diseases	Disease or Syndrome	64	76	0.01		1	1	0	2005	2005
FCGR3A	2214	Craniosynostosis	C0010278	disease	Congenital, Hereditary, and Neonatal Diseases and Abnormalities; Musculoskeletal Diseases	Disease or Syndrome	488	90	0.01		1	1	0	2019	2019
FCGR3A	2214	Yellow Fever	C0043395	disease	Infections	Disease or Syndrome	28	0	0.01		1	1	0	2013	2013
FCGR3A	2214	Infection by Cryptococcus neoformans	C0010414	disease	Infections	Disease or Syndrome	167	1	0.01		1	1	0	2007	2007
FCGR3A	2214	Vasculitis	C0042384	disease	Cardiovascular Diseases	Disease or Syndrome	294	24	0.01		1	1	0	2017	2017
FCGR3A	2214	Urticaria	C0042109	disease	Skin and Connective Tissue Diseases; Immune System Diseases	Disease or Syndrome	168	11	0.01		0	1	0	2004	2004
FCGR3A	2214	Uremia	C0041948	disease	Female Urogenital Diseases and Pregnancy Complications; Male Urogenital Diseases	Disease or Syndrome	110	2	0.01		1	1	0	2016	2016
FCGR3A	2214	HIV Encephalopathy	C0206019	disease	Infections; Immune System Diseases; Nervous System Diseases; Mental Disorders	Disease or Syndrome	45	0	0.01		1	1	0	2018	2018
FCGR3A	2214	CREST Syndrome	C0206138	disease	Digestive System Diseases; Nutritional and Metabolic Diseases; Skin and Connective Tissue Diseases; Cardiovascular Diseases	Disease or Syndrome	59	6	0.01		1	1	0	2017	2017
FCGR3A	2214	Parasitemia	C0242723	disease	Pathological Conditions, Signs and Symptoms; Infections	Disease or Syndrome	140	3	0.01		1	1	0	2017	2017
FCGR3A	2214	Age related macular degeneration	C0242383	disease	Eye Diseases	Disease or Syndrome	685	663	0.01		1	1	0	2012	2012
FCGR3A	2214	Pelvic Inflammatory Disease	C0242172	group	Female Urogenital Diseases and Pregnancy Complications; Infections	Disease or Syndrome	74	3	0.01		1	1	0	2019	2019
FCGR3A	2214	bone destruction	C0238790	disease		Disease or Syndrome	234	3	0.01		1	1	0	2001	2001
FCGR3A	2214	Papillary thyroid carcinoma	C0238463	disease	Neoplasms; Endocrine System Diseases	Neoplastic Process	1348	204	0.01		1	1	0	2014	2014
FCGR3A	2214	Ventilatory defect	C0231926	disease	Respiratory Tract Diseases	Disease or Syndrome	4	1	0.01		1	1	0	2017	2017
FCGR3A	2214	Welts	C0221232	phenotype	Pathological Conditions, Signs and Symptoms; Skin and Connective Tissue Diseases; Immune System Diseases	Sign or Symptom	53	0	0.01		0	1	0	2004	2004
FCGR3A	2214	Adult type dermatomyositis	C0221056	disease	Skin and Connective Tissue Diseases; Musculoskeletal Diseases; Nervous System Diseases	Disease or Syndrome	218	31	0.01		1	1	0	2009	2009
FCGR3A	2214	Chronic berylliosis	C0221052	disease	Pathological Conditions, Signs and Symptoms; Infections; Respiratory Tract Diseases; Occupational Diseases; Wounds and Injuries	Disease or Syndrome	26	0	0.01		1	1	0	2019	2019
FCGR3A	2214	X-linked agammaglobulinemia	C0221026	disease	Congenital, Hereditary, and Neonatal Diseases and Abnormalities; Immune System Diseases; Hemic and Lymphatic Diseases	Disease or Syndrome	68	69	0.01		1	1	0	2007	2007
FCGR3A	2214	Congenital contractural arachnodactyly	C0220668	disease	Congenital, Hereditary, and Neonatal Diseases and Abnormalities; Musculoskeletal Diseases	Congenital Abnormality	559	48	0.01		1	1	0	2010	2010
FCGR3A	2214	Cholangiocarcinoma	C0206698	disease	Neoplasms	Neoplastic Process	877	43	0.01		1	1	0	2010	2010
FCGR3A	2214	Tuberculosis, Pulmonary	C0041327	disease	Infections; Respiratory Tract Diseases	Disease or Syndrome	358	171	0.01		1	1	0	2010	2010

## Sheet: FOXP3
Gene	Gene_id	Disease	Disease_id	Type	Disease_Class	Semantic_Type	N_genes_d	N_SNPs_d	Score_gda	EL_gda	EI_gda	N_PMIDs	N_SNPs_gda	First_Ref	Last_Ref
FOXP3	50943	Insulin-dependent diabetes mellitus secretory diarrhea syndrome	C0342288	disease	Pathological Conditions, Signs and Symptoms; Congenital, Hereditary, and Neonatal Diseases and Abnormalities; Nutritional and Metabolic Diseases; Immune System Diseases; Endocrine System Diseases	Disease or Syndrome	16	18	1		0.971	68	18	1991	2019
FOXP3	50943	Diabetes Mellitus, Insulin-Dependent	C0011854	disease	Nutritional and Metabolic Diseases; Immune System Diseases; Endocrine System Diseases	Disease or Syndrome	1675	954	0.5	strong	0.9	40	1	2003	2019
FOXP3	50943	Breast Carcinoma	C0678222	disease	Neoplasms; Skin and Connective Tissue Diseases	Neoplastic Process	6776	2793	0.4		0.956	45	3	2007	2020
FOXP3	50943	Mammary Neoplasms	C1458155	group	Neoplasms; Skin and Connective Tissue Diseases	Neoplastic Process	2780	385	0.4		1	10	0	2007	2018
FOXP3	50943	Malignant neoplasm of breast	C0006142	disease	Neoplasms; Skin and Connective Tissue Diseases	Neoplastic Process	6941	3417	0.4		0.956	45	3	2007	2020
FOXP3	50943	Rheumatoid Arthritis	C0003873	disease	Skin and Connective Tissue Diseases; Musculoskeletal Diseases; Immune System Diseases	Disease or Syndrome	2723	2387	0.4		0.973	37	1	2005	2020
FOXP3	50943	Adult T-Cell Lymphoma/Leukemia	C0023493	disease	Neoplasms; Immune System Diseases; Hemic and Lymphatic Diseases	Neoplastic Process	540	11	0.4		1	15	0	2004	2018
FOXP3	50943	Neonatal diabetes mellitus	C0158981	disease	Congenital, Hereditary, and Neonatal Diseases and Abnormalities; Nutritional and Metabolic Diseases; Endocrine System Diseases	Disease or Syndrome	42	33	0.32	strong	1	2	0	2007	2009
FOXP3	50943	Mammary Carcinoma, Human	C4704874	disease	Neoplasms; Skin and Connective Tissue Diseases	Neoplastic Process	545	0	0.3		1	1	0	2007	2007
FOXP3	50943	Bipolar Disorder	C0005586	disease	Mental Disorders	Mental or Behavioral Dysfunction	1183	839	0.3		1	1	0	2011	2011
FOXP3	50943	Industrial Dermatosis	C0086457	disease	Skin and Connective Tissue Diseases; Occupational Diseases	Disease or Syndrome	8	0	0.3		1	1	0	2018	2018
FOXP3	50943	Sclerocystic Ovaries	C1136382	disease	Neoplasms; Female Urogenital Diseases and Pregnancy Complications; Endocrine System Diseases	Disease or Syndrome	144	0	0.3		1	1	0	2011	2011
FOXP3	50943	Mammary Neoplasms, Human	C1257931	disease	Neoplasms; Skin and Connective Tissue Diseases	Neoplastic Process	527	0	0.3		1	1	0	2007	2007
FOXP3	50943	Hydrops Fetalis	C0020305	disease	Pathological Conditions, Signs and Symptoms; Congenital, Hereditary, and Neonatal Diseases and Abnormalities; Female Urogenital Diseases and Pregnancy Complications; Immune System Diseases; Hemic and Lymphatic Diseases	Disease or Syndrome	92	14	0.3	strong	1	1	0	2016	2016
FOXP3	50943	Dermatitis, Occupational	C0028796	disease	Skin and Connective Tissue Diseases; Occupational Diseases	Disease or Syndrome	11	0	0.3		1	1	0	2018	2018
FOXP3	50943	Polycystic Ovary Syndrome	C0032460	disease	Neoplasms; Female Urogenital Diseases and Pregnancy Complications; Endocrine System Diseases	Disease or Syndrome	988	363	0.3		1	1	0	2011	2011
FOXP3	50943	Wiskott-Aldrich Syndrome	C0043194	disease	Congenital, Hereditary, and Neonatal Diseases and Abnormalities; Immune System Diseases; Hemic and Lymphatic Diseases	Disease or Syndrome	95	34	0.24		1	5	0	1990	2014
FOXP3	50943	Polyendocrinopathies, Autoimmune	C0085409	group	Immune System Diseases; Endocrine System Diseases	Disease or Syndrome	166	21	0.22		1	5	0	1991	2015
FOXP3	50943	ISLETS OF LANGERHANS, ABSENCE OF	C1844663	phenotype		Finding	1	0	0.2		1	3	0	1991	2009
FOXP3	50943	Autoimmune Syndrome Type II, Polyglandular	C0085860	disease	Immune System Diseases; Endocrine System Diseases	Disease or Syndrome	14	0	0.2		1	3	0	1991	2009
FOXP3	50943	Eczema	C0013595	disease	Skin and Connective Tissue Diseases	Disease or Syndrome	863	368	0.2		0.9	10	0	2007	2019
FOXP3	50943	Colitis	C0009319	disease	Digestive System Diseases	Disease or Syndrome	1135	15	0.2		0.947	19	0	2006	2020
FOXP3	50943	Diabetes Mellitus	C0011849	group	Nutritional and Metabolic Diseases; Endocrine System Diseases	Disease or Syndrome	2803	824	0.19		1	9	0	2006	2019
FOXP3	50943	Immune thrombocytopenic purpura	C0398650	disease	Pathological Conditions, Signs and Symptoms; Immune System Diseases; Hemic and Lymphatic Diseases	Disease or Syndrome	338	35	0.15		0.8	5	0	2007	2018
FOXP3	50943	Hepatitis	C0019158	group	Digestive System Diseases	Disease or Syndrome	656	42	0.14		1	4	0	2011	2019
FOXP3	50943	Pneumonia	C0032285	disease	Infections; Respiratory Tract Diseases	Disease or Syndrome	1032	33	0.14		1	4	1	2016	2018
FOXP3	50943	Gastritis	C0017152	disease	Digestive System Diseases	Disease or Syndrome	292	21	0.13		1	3	0	2008	2017
FOXP3	50943	Sepsis	C0243026	disease	Pathological Conditions, Signs and Symptoms; Infections	Disease or Syndrome	1453	144	0.13		1	3	0	2012	2019
FOXP3	50943	Hypothyroidism	C0020676	disease	Endocrine System Diseases	Disease or Syndrome	613	283	0.12		1	2	0	2013	2018
FOXP3	50943	Alopecia	C0002170	disease	Pathological Conditions, Signs and Symptoms; Skin and Connective Tissue Diseases	Disease or Syndrome	491	375	0.12		1	2	0	2014	2017
FOXP3	50943	Lymphadenopathy	C0497156	phenotype	Hemic and Lymphatic Diseases	Disease or Syndrome	277	5	0.12		1	2	0	2007	2015
FOXP3	50943	Myositis	C0027121	disease	Musculoskeletal Diseases; Nervous System Diseases	Disease or Syndrome	254	43	0.11		1	1	0	2010	2010
FOXP3	50943	Thyroiditis	C0040147	disease	Endocrine System Diseases	Disease or Syndrome	104	7	0.11		1	1	0	2018	2018
FOXP3	50943	Eosinophilia	C0014457	disease	Hemic and Lymphatic Diseases	Disease or Syndrome	325	23	0.11		1	1	0	2017	2017
FOXP3	50943	Urticaria	C0042109	disease	Skin and Connective Tissue Diseases; Immune System Diseases	Disease or Syndrome	168	11	0.11		1	1	0	2008	2008
FOXP3	50943	Nephritis, Tubulointerstitial	C0041349	disease	Female Urogenital Diseases and Pregnancy Complications; Male Urogenital Diseases	Disease or Syndrome	92	6	0.11		1	1	0	2015	2015
FOXP3	50943	Hyperthyroidism	C0020550	disease	Endocrine System Diseases	Disease or Syndrome	279	27	0.11		1	1	0	2012	2012
FOXP3	50943	Malabsorption Syndrome	C0024523	group	Digestive System Diseases; Nutritional and Metabolic Diseases	Disease or Syndrome	239	0	0.1			0	0
FOXP3	50943	Primary malignant neoplasm	C1306459	group	Neoplasms	Neoplastic Process	8221	1374	0.1		1	51	3	2007	2020
FOXP3	50943	Primary malignant neoplasm of lung	C1306460	disease	Neoplasms; Respiratory Tract Diseases	Neoplastic Process	3894	981	0.1		1	10	0	2006	2020
FOXP3	50943	Multiple Sclerosis	C0026769	disease	Immune System Diseases; Nervous System Diseases	Disease or Syndrome	1800	1022	0.1		1	24	3	2005	2019
FOXP3	50943	Membranous glomerulonephritis	C0017665	disease	Female Urogenital Diseases and Pregnancy Complications; Male Urogenital Diseases; Immune System Diseases	Disease or Syndrome	197	33	0.1			0	0
FOXP3	50943	Anti-liver cytosolic antigen type 1 antibody positivity	C4293676	phenotype		Laboratory or Test Result	1	0	0.1			0	0
FOXP3	50943	Malignant neoplasm of prostate	C0376358	disease	Neoplasms; Male Urogenital Diseases	Neoplastic Process	4502	1082	0.1		1	12	1	2007	2019
FOXP3	50943	Recurrent gastroenteritis	C3808828	phenotype		Finding	5	0	0.1			0	0
FOXP3	50943	Lupus Erythematosus, Systemic	C0024141	disease	Skin and Connective Tissue Diseases; Immune System Diseases	Disease or Syndrome	1883	1172	0.1		0.933	30	0	2005	2020
FOXP3	50943	Intestinal Diseases	C0021831	group	Digestive System Diseases	Disease or Syndrome	209	13	0.1		1	12	0	2002	2018
FOXP3	50943	Inflammatory Bowel Diseases	C0021390	group	Digestive System Diseases	Disease or Syndrome	1577	605	0.1		1	23	0	2005	2020
FOXP3	50943	Hypersensitivity	C0020517	group	Immune System Diseases	Pathologic Function	90	2	0.1			0	0
FOXP3	50943	Hypocalcemia	C0020598	phenotype	Nutritional and Metabolic Diseases	Disease or Syndrome	94	13	0.1			0	0
FOXP3	50943	Tumor Cell Invasion	C1269955	phenotype		Neoplastic Process	6626	169	0.1		0.947	19	1	2007	2019
FOXP3	50943	Immunosuppression	C4048329	disease		Disease or Syndrome	632	9	0.1		1	17	0	2006	2019
FOXP3	50943	Variable expressivity	C1861403	phenotype		Finding	319	0	0.1			0	0
FOXP3	50943	Ileus	C1258215	disease	Digestive System Diseases	Disease or Syndrome	20	0	0.1			0	0
FOXP3	50943	Graves Disease	C0018213	disease	Eye Diseases; Immune System Diseases; Endocrine System Diseases	Disease or Syndrome	585	352	0.1		0.941	17	3	2006	2020
FOXP3	50943	Graft-vs-Host Disease	C0018133	disease	Immune System Diseases	Disease or Syndrome	447	25	0.1		0.944	18	1	2004	2019
FOXP3	50943	Immune System Diseases	C0021053	group	Immune System Diseases	Disease or Syndrome	451	116	0.1		1	10	0	2001	2019
FOXP3	50943	Recurrent respiratory infections	C3806482	phenotype	Infections; Respiratory Tract Diseases	Finding	318	7	0.1			0	0
FOXP3	50943	Malignant neoplasm of stomach	C0024623	disease	Digestive System Diseases; Neoplasms	Neoplastic Process	3806	615	0.1		1	17	0	2011	2019
FOXP3	50943	Hypoalbuminemia	C0239981	disease	Hemic and Lymphatic Diseases	Disease or Syndrome	107	9	0.1			0	0
FOXP3	50943	Vomiting	C0042963	phenotype	Pathological Conditions, Signs and Symptoms	Sign or Symptom	303	23	0.1			0	0
FOXP3	50943	Pneumonia, Interstitial	C0206061	disease	Respiratory Tract Diseases	Disease or Syndrome	66	9	0.1			0	0
FOXP3	50943	Immune dysregulation	C1844666	phenotype		Finding	11	1	0.1			0	0
FOXP3	50943	Tumor Progression	C0178874	phenotype	Pathological Conditions, Signs and Symptoms	Neoplastic Process	3865	72	0.1		1	22	1	2007	2019
FOXP3	50943	Liver carcinoma	C2239176	disease	Digestive System Diseases; Neoplasms	Neoplastic Process	5725	942	0.1		1	25	2	2008	2020
FOXP3	50943	Abnormal blistering of the skin	C2132198	phenotype		Finding	75	10	0.1			0	0
FOXP3	50943	X- linked recessive	C1845977	phenotype		Finding	172	1	0.1			0	0
FOXP3	50943	Malabsorption, CTCAE	C1963165	phenotype		Finding	175	0	0.1			0	0
FOXP3	50943	Elevated hepatic transaminase	C1848701	phenotype		Finding	212	9	0.1			0	0
FOXP3	50943	Iron deficiency anemia	C0162316	disease	Nutritional and Metabolic Diseases; Hemic and Lymphatic Diseases	Disease or Syndrome	83	21	0.1			0	0
FOXP3	50943	Recurrent skin infections	C1853193	phenotype	Infections; Skin and Connective Tissue Diseases	Disease or Syndrome	95	2	0.1			0	0
FOXP3	50943	Hypomagnesemia	C0151723	phenotype	Nutritional and Metabolic Diseases	Disease or Syndrome	58	11	0.1			0	0
FOXP3	50943	Bone marrow hypocellularity	C1855710	phenotype		Finding	64	5	0.1			0	1
FOXP3	50943	Crusting erythematous dermatitis	C1868496	disease		Disease or Syndrome	2	0	0.1			0	0
FOXP3	50943	Allergic rhinitis (disorder)	C2607914	disease	Respiratory Tract Diseases; Immune System Diseases; Otorhinolaryngologic Diseases	Disease or Syndrome	446	176	0.1		0.941	17	2	2009	2020
FOXP3	50943	Tuberculosis	C0041296	disease	Infections	Disease or Syndrome	1256	328	0.1		0.9	10	0	2006	2017
FOXP3	50943	Thrombocytopenia	C0040034	phenotype	Hemic and Lymphatic Diseases	Disease or Syndrome	592	110	0.1			0	0
FOXP3	50943	melanoma	C0025202	disease	Neoplasms	Neoplastic Process	3087	515	0.1		0.882	17	0	2007	2019
FOXP3	50943	Meningitis	C0025289	disease	Nervous System Diseases	Disease or Syndrome	191	13	0.1			0	0
FOXP3	50943	Malabsorption	C3714745	phenotype	Digestive System Diseases	Finding	175	3	0.1			0	0
FOXP3	50943	Secretory diarrhea	C0267557	disease	Pathological Conditions, Signs and Symptoms; Digestive System Diseases	Disease or Syndrome	19	2	0.1			0	0
FOXP3	50943	Neoplasm Metastasis	C0027627	phenotype	Pathological Conditions, Signs and Symptoms; Neoplasms	Neoplastic Process	6385	327	0.1		1	22	0	2006	2019
FOXP3	50943	Neoplasms	C0027651	group	Neoplasms	Neoplastic Process	10161	1644	0.1		0.956	229	1	2004	2020
FOXP3	50943	Villous atrophy of intestine	C0267456	disease	Pathological Conditions, Signs and Symptoms; Digestive System Diseases	Disease or Syndrome	19	0	0.1			0	0
FOXP3	50943	Nephrotic Syndrome	C0027726	group	Female Urogenital Diseases and Pregnancy Complications; Male Urogenital Diseases	Disease or Syndrome	384	45	0.1			0	0
FOXP3	50943	Osteomyelitis	C0029443	disease	Infections; Musculoskeletal Diseases	Disease or Syndrome	121	14	0.1			0	0
FOXP3	50943	Pancytopenia	C0030312	disease	Hemic and Lymphatic Diseases	Disease or Syndrome	253	15	0.1			0	1
FOXP3	50943	Psoriasiform eczema	C0262985	disease	Skin and Connective Tissue Diseases	Disease or Syndrome	62	0	0.1			0	0
FOXP3	50943	Malignant neoplasm of lung	C0242379	disease	Neoplasms; Respiratory Tract Diseases	Neoplastic Process	4173	1142	0.1		1	10	0	2006	2020
FOXP3	50943	Psoriasis	C0033860	disease	Skin and Connective Tissue Diseases	Disease or Syndrome	1308	705	0.1		0.9	10	1	2009	2018
FOXP3	50943	Dystrophia unguium	C0221260	disease	Pathological Conditions, Signs and Symptoms; Skin and Connective Tissue Diseases	Disease or Syndrome	81	9	0.1			0	0
FOXP3	50943	Splenomegaly	C0038002	phenotype	Pathological Conditions, Signs and Symptoms	Finding	345	19	0.1			0	0
FOXP3	50943	Failure to thrive in infancy	C1867873	phenotype		Finding	97	12	0.1			0	0
FOXP3	50943	Colorectal Carcinoma	C0009402	disease	Digestive System Diseases; Neoplasms	Neoplastic Process	5473	1962	0.1		1	33	1	2008	2019
FOXP3	50943	Carcinoma of lung	C0684249	disease	Neoplasms; Respiratory Tract Diseases	Neoplastic Process	4081	1204	0.1		1	11	0	2006	2020
FOXP3	50943	Secondary malignant neoplasm of lymph node	C0686619	disease	Pathological Conditions, Signs and Symptoms; Neoplasms	Neoplastic Process	2825	188	0.1		1	14	0	2007	2019
FOXP3	50943	Colon Carcinoma	C0699790	disease	Digestive System Diseases; Neoplasms	Neoplastic Process	2832	275	0.1		1	10	0	2009	2017
FOXP3	50943	Stomach Carcinoma	C0699791	disease	Digestive System Diseases; Neoplasms	Neoplastic Process	3720	652	0.1		1	17	0	2011	2019
FOXP3	50943	Diarrhea	C0011991	phenotype	Pathological Conditions, Signs and Symptoms	Sign or Symptom	632	63	0.1			0	0
FOXP3	50943	Autoimmune Diseases	C0004364	group	Immune System Diseases	Disease or Syndrome	1758	428	0.1		0.968	156	1	2002	2020
FOXP3	50943	Arthritis	C0003864	disease	Musculoskeletal Diseases	Disease or Syndrome	1072	69	0.1		0.929	14	0	2007	2019
FOXP3	50943	Malignant neoplasm of colon and/or rectum	C4722085	disease		Neoplastic Process	3669	502	0.1		1	14	1	2010	2019
FOXP3	50943	Hepatitis C	C0019196	disease	Digestive System Diseases; Infections	Disease or Syndrome	1768	347	0.1		1	10	0	2007	2019
FOXP3	50943	Crohn Disease	C0010346	disease	Digestive System Diseases	Disease or Syndrome	1382	1147	0.1		1	16	1	2005	2020
FOXP3	50943	Cachexia	C0006625	phenotype	Pathological Conditions, Signs and Symptoms	Sign or Symptom	273	11	0.1			0	0
FOXP3	50943	Ulcerative Colitis	C0009324	disease	Digestive System Diseases	Disease or Syndrome	1458	827	0.1		0.941	17	1	2005	2020
FOXP3	50943	Villous atrophy	C0554101	phenotype		Finding	19	0	0.1			0	0
FOXP3	50943	Celiac Disease	C0007570	disease	Digestive System Diseases; Nutritional and Metabolic Diseases	Disease or Syndrome	527	263	0.1		0.8	10	0	2005	2018
FOXP3	50943	Hypomagnesemia, CTCAE	C4552839	phenotype		Finding	21	0	0.1			0	0
FOXP3	50943	Non-Small Cell Lung Carcinoma	C0007131	disease	Neoplasms; Respiratory Tract Diseases	Neoplastic Process	3926	712	0.1		0.957	23	1	2006	2020
FOXP3	50943	Reduced proportion of CD4-negative, CD8-negative, alpha-beta regulatory T cells	C4531149	phenotype		Finding	1	0	0.1			0	0
FOXP3	50943	Carcinogenesis	C0596263	phenotype	Pathological Conditions, Signs and Symptoms; Neoplasms	Neoplastic Process	6243	355	0.1		1	11	0	2008	2019
FOXP3	50943	Malignant Neoplasms	C0006826	group	Neoplasms	Neoplastic Process	8621	1641	0.1		1	59	3	2007	2020
FOXP3	50943	Atherosclerosis	C0004153	disease	Cardiovascular Diseases	Disease or Syndrome	2044	281	0.1		1	10	0	2015	2019
FOXP3	50943	Autoimmune hemolytic anemia	C0002880	disease	Immune System Diseases; Hemic and Lymphatic Diseases	Disease or Syndrome	81	0	0.1			0	0
FOXP3	50943	Encephalomyelitis	C0014070	disease	Infections; Nervous System Diseases	Disease or Syndrome	865	7	0.1		1	13	0	2006	2019
FOXP3	50943	Arteriosclerosis	C0003850	disease	Cardiovascular Diseases	Disease or Syndrome	2006	267	0.1		1	10	0	2015	2019
FOXP3	50943	Anti-thyroid peroxidase antibody positivity	C4476743	phenotype		Laboratory or Test Result	3	0	0.1			0	0
FOXP3	50943	Anemia	C0002871	disease	Hemic and Lymphatic Diseases	Disease or Syndrome	847	94	0.1			0	1
FOXP3	50943	Decreased prealbumin level	C4476964	phenotype		Finding	1	0	0.1			0	0
FOXP3	50943	Asthma	C0004096	disease	Respiratory Tract Diseases; Immune System Diseases	Disease or Syndrome	2096	1536	0.1		1	28	0	2004	2020
FOXP3	50943	Respiratory distress	C0476273	phenotype	Pathological Conditions, Signs and Symptoms; Respiratory Tract Diseases	Sign or Symptom	259	16	0.1			0	0
FOXP3	50943	Dependency on intravenous nutrition	C4476622	phenotype		Finding	3	0	0.1			0	0
FOXP3	50943	Insulin receptor antibody positivity	C4476973	phenotype		Laboratory or Test Result	2	0	0.1			0	0
FOXP3	50943	Hashimoto Disease	C0677607	disease	Endocrine System Diseases	Disease or Syndrome	335	131	0.09		1	9	2	2009	2020
FOXP3	50943	Systemic Scleroderma	C0036421	disease	Skin and Connective Tissue Diseases	Disease or Syndrome	979	287	0.09		0.778	9	2	2010	2020
FOXP3	50943	Cervix carcinoma	C0302592	disease	Neoplasms; Female Urogenital Diseases and Pregnancy Complications	Neoplastic Process	1881	283	0.09		1	9	0	2009	2019
FOXP3	50943	Dermatitis, Atopic	C0011615	disease	Congenital, Hereditary, and Neonatal Diseases and Abnormalities; Skin and Connective Tissue Diseases; Immune System Diseases	Disease or Syndrome	751	232	0.09		0.889	9	0	2007	2019
FOXP3	50943	Malignant tumor of colon	C0007102	disease	Digestive System Diseases; Neoplasms	Neoplastic Process	2969	688	0.09		1	9	0	2009	2017
FOXP3	50943	Diffuse Large B-Cell Lymphoma	C0079744	disease	Neoplasms; Immune System Diseases; Hemic and Lymphatic Diseases	Neoplastic Process	1043	127	0.08		0.875	8	0	2008	2017
FOXP3	50943	Allergic asthma	C0155877	disease	Respiratory Tract Diseases; Immune System Diseases	Disease or Syndrome	371	55	0.08		1	8	0	2007	2019
FOXP3	50943	Squamous cell carcinoma	C0007137	disease	Neoplasms	Neoplastic Process	2507	257	0.08		1	8	0	2007	2019
FOXP3	50943	Prostate carcinoma	C0600139	disease	Neoplasms; Male Urogenital Diseases	Neoplastic Process	4388	1168	0.08		1	8	1	2007	2019
FOXP3	50943	cervical cancer	C4048328	disease	Neoplasms; Female Urogenital Diseases and Pregnancy Complications	Neoplastic Process	1817	268	0.08		1	8	0	2009	2019
FOXP3	50943	Tumor Immunity	C1519680	phenotype	Pathological Conditions, Signs and Symptoms	Disease or Syndrome	337	2	0.08		1	8	0	2008	2019
FOXP3	50943	Leukemia, T-Cell	C0023492	disease	Neoplasms; Immune System Diseases; Hemic and Lymphatic Diseases	Neoplastic Process	457	10	0.08		1	8	0	2006	2018
FOXP3	50943	Chronic graft-versus-host disease	C0867389	disease	Immune System Diseases	Disease or Syndrome	241	17	0.08		1	8	0	2005	2018
FOXP3	50943	IMMUNE SUPPRESSION	C1840264	phenotype		Disease or Syndrome	222	3	0.08		1	8	0	2007	2019
FOXP3	50943	Myasthenia Gravis	C0026896	disease	Neoplasms; Immune System Diseases; Nervous System Diseases	Disease or Syndrome	336	93	0.08		0.875	8	0	2009	2018
FOXP3	50943	Diabetes	C0011847	disease	Endocrine System Diseases	Disease or Syndrome	2359	710	0.08		1	8	0	2006	2019
FOXP3	50943	Malignant tumor of cervix	C0007847	disease	Neoplasms; Female Urogenital Diseases and Pregnancy Complications	Neoplastic Process	1718	245	0.08		1	8	0	2009	2019
FOXP3	50943	Common Variable Immunodeficiency	C0009447	disease	Immune System Diseases	Disease or Syndrome	207	85	0.07		0.857	7	0	2007	2020
FOXP3	50943	Acute Chest Syndrome	C0742343	disease	Congenital, Hereditary, and Neonatal Diseases and Abnormalities; Respiratory Tract Diseases; Hemic and Lymphatic Diseases	Disease or Syndrome	405	135	0.07		1	7	1	2012	2019
FOXP3	50943	Lupus Nephritis	C0024143	disease	Female Urogenital Diseases and Pregnancy Complications; Skin and Connective Tissue Diseases; Male Urogenital Diseases; Immune System Diseases	Disease or Syndrome	503	64	0.07		1	7	0	2009	2018
FOXP3	50943	Complete atrioventricular block	C0151517	disease	Pathological Conditions, Signs and Symptoms; Cardiovascular Diseases	Disease or Syndrome	403	96	0.07		1	7	2	2011	2019
FOXP3	50943	Autoimmune thyroid disease (AITD)	C3840565	disease		Disease or Syndrome	133	54	0.07		1	7	2	2007	2019
FOXP3	50943	Diphtheria	C0012546	disease	Infections	Disease or Syndrome	147	0	0.07		1	7	0	2007	2019
FOXP3	50943	HIV Infections	C0019693	group	Infections; Immune System Diseases	Disease or Syndrome	807	142	0.07		1	7	0	2007	2016
FOXP3	50943	Immunologic Deficiency Syndromes	C0021051	group	Immune System Diseases	Disease or Syndrome	973	31	0.07		1	7	0	2006	2018
FOXP3	50943	Squamous cell carcinoma of the head and neck	C1168401	disease	Neoplasms	Neoplastic Process	1543	348	0.07		1	7	0	2017	2019
FOXP3	50943	Carcinoma	C0007097	group	Neoplasms	Neoplastic Process	2462	103	0.07		1	7	0	2007	2019
FOXP3	50943	Juvenile arthritis	C3495559	disease	Skin and Connective Tissue Diseases; Musculoskeletal Diseases; Immune System Diseases	Disease or Syndrome	450	128	0.07		0.857	7	0	2004	2018
FOXP3	50943	Nasal Polyps	C0027430	disease	Pathological Conditions, Signs and Symptoms; Respiratory Tract Diseases; Otorhinolaryngologic Diseases	Disease or Syndrome	484	34	0.06		1	6	0	2008	2018
FOXP3	50943	Primary biliary cirrhosis	C0008312	disease	Pathological Conditions, Signs and Symptoms; Digestive System Diseases	Disease or Syndrome	478	667	0.06		1	6	0	2005	2017
FOXP3	50943	Chronic Obstructive Airway Disease	C0024117	disease	Respiratory Tract Diseases	Disease or Syndrome	1428	852	0.06		1	6	0	2011	2019
FOXP3	50943	Lupus Erythematosus	C0409974	disease	Pathological Conditions, Signs and Symptoms; Skin and Connective Tissue Diseases; Immune System Diseases	Disease or Syndrome	558	44	0.06		1	6	0	2008	2020
FOXP3	50943	Coronary Artery Disease	C1956346	disease	Cardiovascular Diseases	Disease or Syndrome	1708	1577	0.06		0.833	6	0	2013	2019
FOXP3	50943	Malaria	C0024530	disease	Infections	Disease or Syndrome	685	148	0.06		0.833	6	0	2008	2018
FOXP3	50943	Aplastic Anemia	C0002874	disease	Hemic and Lymphatic Diseases	Disease or Syndrome	238	30	0.06		1	6	0	2007	2019
FOXP3	50943	Autoimmune hepatitis	C4721555	disease	Digestive System Diseases	Disease or Syndrome	190	22	0.06		1	6	0	2008	2019
FOXP3	50943	Leukemia, Myelocytic, Acute	C0023467	disease	Neoplasms	Neoplastic Process	3111	6892	0.06		1	6	0	2007	2018
FOXP3	50943	IgE-mediated food allergy	C4554344	disease	Immune System Diseases	Disease or Syndrome	126	16	0.06		1	6	0	2010	2020
FOXP3	50943	Autoimmune Chronic Hepatitis	C0241910	disease	Digestive System Diseases; Immune System Diseases	Disease or Syndrome	213	23	0.06		1	6	0	2008	2019
FOXP3	50943	Adenocarcinoma of lung (disorder)	C0152013	disease	Neoplasms	Neoplastic Process	2438	563	0.05		1	5	0	2013	2017
FOXP3	50943	Vitiligo	C0042900	disease	Skin and Connective Tissue Diseases	Disease or Syndrome	395	249	0.05		0.8	5	2	2013	2017
FOXP3	50943	Secondary malignant neoplasm of lung	C0153676	disease	Neoplasms; Respiratory Tract Diseases	Neoplastic Process	1370	20	0.05		1	5	0	2013	2019
FOXP3	50943	Multiple Myeloma	C0026764	disease	Neoplasms; Immune System Diseases; Hemic and Lymphatic Diseases; Cardiovascular Diseases	Neoplastic Process	1740	865	0.05		1	5	0	2006	2015
FOXP3	50943	VITILIGO-ASSOCIATED MULTIPLE AUTOIMMUNE DISEASE SUSCEPTIBILITY 1 (finding)	C1847835	disease	Skin and Connective Tissue Diseases	Disease or Syndrome	302	92	0.05		0.8	5	2	2013	2017
FOXP3	50943	Refractory anemias	C0002893	disease	Hemic and Lymphatic Diseases	Disease or Syndrome	340	11	0.05		1	5	0	2010	2018
FOXP3	50943	Lichen Planus, Oral	C0206139	disease	Skin and Connective Tissue Diseases; Stomatognathic Diseases	Disease or Syndrome	257	20	0.05		1	5	0	2014	2019
FOXP3	50943	HIV-1 infection	C2363741	disease		Disease or Syndrome	695	94	0.05		1	5	0	2007	2009
FOXP3	50943	Endometriosis	C0014175	disease	Female Urogenital Diseases and Pregnancy Complications	Disease or Syndrome	1188	274	0.05		1	5	5	2010	2019
FOXP3	50943	Skin lesion	C0037284	group	Skin and Connective Tissue Diseases	Disease or Syndrome	563	52	0.05		1	5	0	2007	2017
FOXP3	50943	Cow milk allergy	C0266815	phenotype	Digestive System Diseases; Immune System Diseases	Disease or Syndrome	38	0	0.05		1	5	0	2010	2019
FOXP3	50943	Lupus Erythematosus, Discoid	C0024138	disease	Skin and Connective Tissue Diseases	Disease or Syndrome	552	46	0.05		1	5	0	2009	2020
FOXP3	50943	Lupus Vulgaris	C0024131	disease	Infections; Skin and Connective Tissue Diseases	Disease or Syndrome	526	44	0.05		1	5	0	2009	2020
FOXP3	50943	Coronary heart disease	C0010068	disease	Cardiovascular Diseases	Disease or Syndrome	1576	1178	0.05		1	5	0	2013	2019
FOXP3	50943	Acute Coronary Syndrome	C0948089	disease	Cardiovascular Diseases	Disease or Syndrome	440	139	0.05		1	5	0	2013	2019
FOXP3	50943	Conventional (Clear Cell) Renal Cell Carcinoma	C0279702	disease	Neoplasms; Female Urogenital Diseases and Pregnancy Complications; Male Urogenital Diseases	Neoplastic Process	2346	222	0.05		1	5	0	2017	2020
FOXP3	50943	HTLV-I Infections	C0020097	group	Infections; Immune System Diseases	Disease or Syndrome	134	5	0.05		1	5	0	2009	2018
FOXP3	50943	Adult Diffuse Large B-Cell Lymphoma	C1332201	disease	Neoplasms; Immune System Diseases; Hemic and Lymphatic Diseases	Neoplastic Process	504	46	0.05		1	5	0	2008	2017
FOXP3	50943	Human papilloma virus infection	C0343641	disease	Infections	Disease or Syndrome	429	42	0.05		1	5	2	2017	2019
FOXP3	50943	Leishmaniasis, Visceral	C0023290	disease	Infections	Disease or Syndrome	197	22	0.05		1	5	0	2007	2018
FOXP3	50943	Glioma	C0017638	disease	Neoplasms	Neoplastic Process	3097	353	0.05		1	5	0	2007	2017
FOXP3	50943	Hepatitis B	C0019163	disease	Digestive System Diseases; Infections	Disease or Syndrome	1449	519	0.05		1	5	2	2011	2017
FOXP3	50943	Autoimmune enteropathy	C0341305	disease	Immune System Diseases; Endocrine System Diseases	Disease or Syndrome	4	0	0.04		1	4	0	2007	2010
FOXP3	50943	Solid Neoplasm	C0280100	phenotype	Neoplasms	Neoplastic Process	1145	24	0.04		1	4	0	2008	2017
FOXP3	50943	Triple Negative Breast Neoplasms	C3539878	disease	Neoplasms; Skin and Connective Tissue Diseases	Neoplastic Process	1674	99	0.04		1	4	1	2014	2019
FOXP3	50943	Polyglandular Type I Autoimmune Syndrome	C0085859	disease	Immune System Diseases; Endocrine System Diseases	Disease or Syndrome	64	76	0.04		1	4	0	2006	2016
FOXP3	50943	Inflammatory disorder	C1290884	group	Pathological Conditions, Signs and Symptoms	Disease or Syndrome	391	8	0.04		1	4	0	2012	2018
FOXP3	50943	Acute GVH disease	C0856825	disease	Immune System Diseases	Disease or Syndrome	294	49	0.04		1	4	2	2012	2015
FOXP3	50943	Periodontitis	C0031099	disease	Stomatognathic Diseases	Disease or Syndrome	682	116	0.04		1	4	0	2005	2018
FOXP3	50943	Endometrial Carcinoma	C0476089	disease	Neoplasms; Female Urogenital Diseases and Pregnancy Complications	Neoplastic Process	1597	326	0.04		1	4	1	2017	2019
FOXP3	50943	Virus Diseases	C0042769	group	Infections	Disease or Syndrome	1471	42	0.04		0.75	4	0	2009	2016
FOXP3	50943	Adult type dermatomyositis	C0221056	disease	Skin and Connective Tissue Diseases; Musculoskeletal Diseases; Nervous System Diseases	Disease or Syndrome	218	31	0.04		1	4	0	2008	2017
FOXP3	50943	Glioblastoma	C0017636	disease	Neoplasms	Neoplastic Process	3177	281	0.04		1	4	0	2012	2018
FOXP3	50943	Thyroid Diseases	C0040128	group	Endocrine System Diseases	Disease or Syndrome	230	26	0.04		1	4	0	2007	2019
FOXP3	50943	Renal Cell Carcinoma	C0007134	disease	Neoplasms; Female Urogenital Diseases and Pregnancy Complications; Male Urogenital Diseases	Neoplastic Process	2084	288	0.04		1	4	0	2018	2020
FOXP3	50943	Thymoma	C0040100	disease	Neoplasms; Hemic and Lymphatic Diseases	Neoplastic Process	291	20	0.04		0.5	4	0	2007	2016
FOXP3	50943	Miscarriage	C4552766	disease	Female Urogenital Diseases and Pregnancy Complications	Disease or Syndrome	426	56	0.04		1	4	0	2009	2015
FOXP3	50943	Lymphoma	C0024299	group	Neoplasms; Immune System Diseases; Hemic and Lymphatic Diseases	Neoplastic Process	1548	91	0.04		1	4	0	2008	2017
FOXP3	50943	Diabetes Mellitus, Non-Insulin-Dependent	C0011860	disease	Nutritional and Metabolic Diseases; Endocrine System Diseases	Disease or Syndrome	3134	2672	0.04		1	4	0	2013	2019
FOXP3	50943	Eclampsia	C0013537	disease	Female Urogenital Diseases and Pregnancy Complications	Disease or Syndrome	241	38	0.04		1	4	0	2014	2019
FOXP3	50943	Dermatomyositis	C0011633	disease	Skin and Connective Tissue Diseases; Musculoskeletal Diseases; Nervous System Diseases	Disease or Syndrome	235	34	0.04		1	4	0	2008	2017
FOXP3	50943	Glioblastoma Multiforme	C1621958	disease	Neoplasms	Neoplastic Process	3197	186	0.04		1	4	0	2012	2018
FOXP3	50943	Coronary Arteriosclerosis	C0010054	disease	Cardiovascular Diseases	Disease or Syndrome	1282	440	0.04		1	4	0	2013	2019
FOXP3	50943	Mycosis Fungoides	C0026948	group	Neoplasms; Immune System Diseases; Hemic and Lymphatic Diseases	Neoplastic Process	251	8	0.04		1	4	0	2006	2018
FOXP3	50943	Papillary thyroid carcinoma	C0238463	disease	Neoplasms; Endocrine System Diseases	Neoplastic Process	1348	204	0.04		1	4	0	2014	2019
FOXP3	50943	Lymphoma, T-Cell, Cutaneous	C0079773	disease	Neoplasms; Immune System Diseases; Hemic and Lymphatic Diseases	Neoplastic Process	367	5	0.04		1	4	0	2006	2009
FOXP3	50943	Arthritis, Psoriatic	C0003872	disease	Skin and Connective Tissue Diseases; Musculoskeletal Diseases	Disease or Syndrome	450	89	0.04		1	4	0	2009	2018
FOXP3	50943	Invasive Ductal Breast Carcinoma	C1134719	disease	Neoplasms; Skin and Connective Tissue Diseases	Neoplastic Process	414	16	0.04		1	4	0	2010	2019
FOXP3	50943	Pain	C0030193	phenotype	Pathological Conditions, Signs and Symptoms	Sign or Symptom	1554	196	0.03		1	3	0	2019	2020
FOXP3	50943	Acquired Hypogammaglobulinemia	C2936664	disease	Immune System Diseases	Disease or Syndrome	89	4	0.03		1	3	0	2009	2015
FOXP3	50943	Prostatic Neoplasms	C0033578	group	Neoplasms; Male Urogenital Diseases	Neoplastic Process	1722	31	0.03		1	3	0	2007	2011
FOXP3	50943	Endocrine System Diseases	C0014130	group	Endocrine System Diseases	Disease or Syndrome	74	0	0.03		1	3	0	2001	2011
FOXP3	50943	T-lymphocyte deficiency	C1744558	disease		Disease or Syndrome	25	0	0.03		1	3	0	2013	2019
FOXP3	50943	Sarcoidosis	C0036202	disease	Hemic and Lymphatic Diseases	Disease or Syndrome	413	787	0.03		0.667	3	0	2007	2018
FOXP3	50943	Nasopharyngeal carcinoma	C2931822	disease	Neoplasms; Stomatognathic Diseases; Otorhinolaryngologic Diseases	Neoplastic Process	1553	320	0.03		1	3	0	2017	2019
FOXP3	50943	Tuberculosis, Pulmonary	C0041327	disease	Infections; Respiratory Tract Diseases	Disease or Syndrome	358	171	0.03		0.667	3	0	2006	2018
FOXP3	50943	ANOPHTHALMIA AND PULMONARY HYPOPLASIA	C1832661	disease	Congenital, Hereditary, and Neonatal Diseases and Abnormalities; Eye Diseases; Respiratory Tract Diseases	Disease or Syndrome	1410	80	0.03		1	3	0	2018	2019
FOXP3	50943	Ankylosing spondylitis	C0038013	disease	Musculoskeletal Diseases	Disease or Syndrome	710	609	0.03		1	3	0	2016	2019
FOXP3	50943	Eosinophilic esophagitis	C0341106	disease	Digestive System Diseases; Immune System Diseases; Hemic and Lymphatic Diseases	Disease or Syndrome	183	40	0.03		1	3	0	2010	2017
FOXP3	50943	Invasive carcinoma of breast	C0853879	disease	Neoplasms; Skin and Connective Tissue Diseases	Neoplastic Process	473	21	0.03		1	3	0	2007	2019
FOXP3	50943	Sezary Syndrome	C0036920	disease	Neoplasms; Immune System Diseases; Hemic and Lymphatic Diseases	Neoplastic Process	196	7	0.03		1	3	0	2008	2009
FOXP3	50943	Septicemia	C0036690	disease	Pathological Conditions, Signs and Symptoms; Infections	Disease or Syndrome	1285	141	0.03		1	3	0	2012	2019
FOXP3	50943	allergic symptom	C0740903	phenotype		Sign or Symptom	37	2	0.03		1	3	0	2014	2019
FOXP3	50943	Secondary Neoplasm	C2939419	group	Pathological Conditions, Signs and Symptoms; Neoplasms	Neoplastic Process	2492	85	0.03		1	3	0	2016	2018
FOXP3	50943	Pancreatic carcinoma	C0235974	disease	Digestive System Diseases; Neoplasms; Endocrine System Diseases	Neoplastic Process	2689	322	0.03		1	3	0	2007	2019
FOXP3	50943	Malignant neoplasm of ovary	C1140680	disease	Neoplasms; Female Urogenital Diseases and Pregnancy Complications; Endocrine System Diseases	Neoplastic Process	2563	315	0.03		1	3	0	2005	2010
FOXP3	50943	Amyotrophic Lateral Sclerosis	C0002736	disease	Nutritional and Metabolic Diseases; Nervous System Diseases	Disease or Syndrome	1114	485	0.03		1	3	0	2013	2018
FOXP3	50943	Glomerulonephritis	C0017658	disease	Female Urogenital Diseases and Pregnancy Complications; Male Urogenital Diseases	Disease or Syndrome	391	7	0.03		1	3	0	2008	2017
FOXP3	50943	Metastatic melanoma	C0278883	disease	Neoplasms	Neoplastic Process	504	42	0.03		1	3	0	2011	2019
FOXP3	50943	Infection	C3714514	group	Infections	Pathologic Function	491	0	0.03		1	3	0	2006	2008
FOXP3	50943	Pneumonitis	C3714636	disease	Infections; Respiratory Tract Diseases	Disease or Syndrome	697	13	0.03		1	3	0	2016	2018
FOXP3	50943	Omenn Syndrome	C2700553	disease	Congenital, Hereditary, and Neonatal Diseases and Abnormalities; Nutritional and Metabolic Diseases; Immune System Diseases	Disease or Syndrome	35	48	0.03		1	3	0	2008	2010
FOXP3	50943	Juvenile rheumatoid arthritis	C3714757	disease	Skin and Connective Tissue Diseases; Musculoskeletal Diseases; Immune System Diseases	Disease or Syndrome	183	10	0.03		0.667	3	0	2007	2018
FOXP3	50943	Cardiomyopathy, Familial Idiopathic	C1449563	disease	Cardiovascular Diseases	Disease or Syndrome	773	243	0.03		1	3	0	2010	2017
FOXP3	50943	Autoimmune thyroiditis	C0920350	disease	Immune System Diseases; Endocrine System Diseases	Disease or Syndrome	161	76	0.03		1	3	0	2009	2017
FOXP3	50943	Lymphopenia	C0024312	disease	Immune System Diseases; Hemic and Lymphatic Diseases	Disease or Syndrome	239	16	0.03		1	3	0	2005	2008
FOXP3	50943	Psoriasis vulgaris	C0263361	disease	Skin and Connective Tissue Diseases	Disease or Syndrome	255	80	0.03		1	3	0	2009	2017
FOXP3	50943	Laryngeal Squamous Cell Carcinoma	C0280324	disease	Neoplasms; Respiratory Tract Diseases; Otorhinolaryngologic Diseases	Neoplastic Process	504	30	0.03		1	3	0	2013	2018
FOXP3	50943	Prostatic Intraepithelial Neoplasias	C0282612	disease	Neoplasms	Neoplastic Process	230	0	0.03		1	3	0	2009	2015
FOXP3	50943	Lymphoma, Non-Hodgkin	C0024305	disease	Neoplasms; Immune System Diseases; Hemic and Lymphatic Diseases	Neoplastic Process	733	197	0.03		1	3	0	2007	2014
FOXP3	50943	bone destruction	C0238790	disease		Disease or Syndrome	234	3	0.03		1	3	0	2007	2010
FOXP3	50943	Tumor Initiation	C0598935	phenotype	Pathological Conditions, Signs and Symptoms; Neoplasms	Neoplastic Process	533	8	0.03		1	3	0	2015	2017
FOXP3	50943	leukemia	C0023418	disease	Neoplasms	Neoplastic Process	2111	144	0.03		1	3	0	2006	2012
FOXP3	50943	Bullous pemphigoid	C0030805	disease	Skin and Connective Tissue Diseases; Immune System Diseases	Disease or Syndrome	127	11	0.03		1	3	0	2007	2017
FOXP3	50943	Tropical Spastic Paraparesis	C0030481	disease	Infections; Nervous System Diseases	Disease or Syndrome	88	4	0.03		1	3	0	2006	2018
FOXP3	50943	Malignant neoplasm of esophagus	C0546837	disease	Digestive System Diseases; Neoplasms	Neoplastic Process	1286	214	0.03		1	3	0	2011	2019
FOXP3	50943	MYELODYSPLASTIC SYNDROME	C3463824	group	Hemic and Lymphatic Diseases	Neoplastic Process	1033	95	0.03		1	3	0	2009	2017
FOXP3	50943	Triple-Negative Breast Carcinoma	C4722518	disease	Neoplasms; Skin and Connective Tissue Diseases	Neoplastic Process	1598	96	0.03		1	3	1	2014	2019
FOXP3	50943	Leukocyte adhesion deficiency type 1	C0398738	disease	Congenital, Hereditary, and Neonatal Diseases and Abnormalities; Immune System Diseases	Disease or Syndrome	114	26	0.02		1	2	0	2017	2019
FOXP3	50943	Gastrointestinal symptom	C0426576	phenotype	Pathological Conditions, Signs and Symptoms	Sign or Symptom	69	7	0.02		1	2	0	2007	2020
FOXP3	50943	Helicobacter pylori (H. pylori) infection in conditions classified elsewhere and of unspecified site	C0374997	disease		Disease or Syndrome	593	24	0.02		1	2	1	2005	2018
FOXP3	50943	Multiple Sclerosis, Relapsing-Remitting	C0751967	disease	Immune System Diseases; Nervous System Diseases	Disease or Syndrome	206	7	0.02		1	2	0	2006	2018
FOXP3	50943	Diabetes, Autoimmune	C0205734	disease	Nutritional and Metabolic Diseases; Immune System Diseases; Endocrine System Diseases	Disease or Syndrome	172	4	0.02		1	2	0	2018	2018
FOXP3	50943	Malignant Pleural Mesothelioma	C0812413	disease	Neoplasms; Respiratory Tract Diseases	Neoplastic Process	421	15	0.02		1	2	0	2009	2020
FOXP3	50943	Autoimmune thyroid disease	C0178468	disease	Immune System Diseases; Endocrine System Diseases	Disease or Syndrome	107	15	0.02		1	2	0	2011	2019
FOXP3	50943	Aortic Aneurysm, Abdominal	C0162871	disease	Cardiovascular Diseases	Disease or Syndrome	586	90	0.02		1	2	0	2010	2018
FOXP3	50943	Acute intermittent porphyria	C0162565	disease	Congenital, Hereditary, and Neonatal Diseases and Abnormalities; Digestive System Diseases; Nutritional and Metabolic Diseases; Skin and Connective Tissue Diseases	Disease or Syndrome	103	68	0.02		1	2	0	2009	2011
FOXP3	50943	early pregnancy	C0747845	phenotype		Disease or Syndrome	273	8	0.02		1	2	0	2019	2019
FOXP3	50943	Cockayne Syndrome, Type I	C0751039	disease	Congenital, Hereditary, and Neonatal Diseases and Abnormalities; Nutritional and Metabolic Diseases; Musculoskeletal Diseases; Nervous System Diseases	Disease or Syndrome	80	42	0.02		1	2	0	2017	2018
FOXP3	50943	Trichohepatoenteric Syndrome	C1857276	disease	Pathological Conditions, Signs and Symptoms; Congenital, Hereditary, and Neonatal Diseases and Abnormalities; Female Urogenital Diseases and Pregnancy Complications; Skin and Connective Tissue Diseases	Disease or Syndrome	424	28	0.02		1	2	0	2001	2007
FOXP3	50943	Malignant neoplasm of pancreas	C0346647	disease	Digestive System Diseases; Neoplasms; Endocrine System Diseases	Neoplastic Process	2667	277	0.02		1	2	0	2011	2019
FOXP3	50943	Sjogren's Syndrome	C1527336	disease	Eye Diseases; Skin and Connective Tissue Diseases; Musculoskeletal Diseases; Immune System Diseases; Stomatognathic Diseases	Disease or Syndrome	481	47	0.02		1	2	0	2008	2018
FOXP3	50943	Chronic viral hepatitis	C0276623	disease	Digestive System Diseases	Disease or Syndrome	59	8	0.02		1	2	0	2007	2011
FOXP3	50943	Childhood Lymphoma	C1332979	disease	Neoplasms; Immune System Diseases; Hemic and Lymphatic Diseases	Neoplastic Process	1171	66	0.02		1	2	0	2010	2017
FOXP3	50943	ovarian neoplasm	C0919267	disease	Neoplasms; Female Urogenital Diseases and Pregnancy Complications; Endocrine System Diseases	Neoplastic Process	2542	757	0.02		1	2	0	2005	2010
FOXP3	50943	Infantile Colic	C0266836	phenotype	Congenital, Hereditary, and Neonatal Diseases and Abnormalities	Sign or Symptom	3	0	0.02		1	2	0	2018	2018
FOXP3	50943	Chronic Periodontitis	C0266929	disease	Stomatognathic Diseases	Disease or Syndrome	287	99	0.02		1	2	0	2009	2018
FOXP3	50943	Auricular swelling	C0549297	phenotype	Female Urogenital Diseases and Pregnancy Complications; Male Urogenital Diseases	Sign or Symptom	49	0	0.02		1	2	0	2012	2017
FOXP3	50943	Salivary Gland Pleomorphic Adenoma	C1519176	disease	Neoplasms; Stomatognathic Diseases	Neoplastic Process	63	9	0.02		1	2	0	2012	2015
FOXP3	50943	Liver and Intrahepatic Biliary Tract Carcinoma	C0279000	disease	Digestive System Diseases; Neoplasms	Neoplastic Process	1395	73	0.02		1	2	0	2015	2019
FOXP3	50943	Gastric Adenocarcinoma	C0278701	disease	Digestive System Diseases; Neoplasms	Neoplastic Process	453	235	0.02		1	2	0	2019	2020
FOXP3	50943	Inflammatory Breast Carcinoma	C0278601	disease	Neoplasms; Skin and Connective Tissue Diseases	Neoplastic Process	183	0	0.02		0.5	2	0	2016	2019
FOXP3	50943	Childhood Leukemia	C1332977	disease	Neoplasms	Neoplastic Process	1740	140	0.02		1	2	0	2008	2012
FOXP3	50943	Acquired aplastic anemia	C0271907	disease	Hemic and Lymphatic Diseases	Disease or Syndrome	64	12	0.02		1	2	0	2007	2015
FOXP3	50943	Autism Spectrum Disorders	C1510586	disease	Mental Disorders	Mental or Behavioral Dysfunction	1071	331	0.02		1	2	2	2017	2019
FOXP3	50943	Mucosa-Associated Lymphoid Tissue Lymphoma	C0242647	disease	Neoplasms; Immune System Diseases; Hemic and Lymphatic Diseases	Neoplastic Process	264	13	0.02		1	2	0	2011	2019
FOXP3	50943	Adult Lymphoma	C1332206	disease	Neoplasms; Immune System Diseases; Hemic and Lymphatic Diseases	Neoplastic Process	1169	66	0.02		1	2	0	2010	2017
FOXP3	50943	Malignant neoplasm of liver	C0345904	disease	Digestive System Diseases; Neoplasms	Neoplastic Process	1649	88	0.02		1	2	0	2015	2019
FOXP3	50943	Carcinoma of bladder	C0699885	disease	Neoplasms; Female Urogenital Diseases and Pregnancy Complications; Male Urogenital Diseases	Neoplastic Process	2104	309	0.02		1	2	0	2016	2016
FOXP3	50943	Sleep Apnea, Obstructive	C0520679	disease	Respiratory Tract Diseases; Nervous System Diseases	Disease or Syndrome	480	105	0.02		1	2	0	2010	2012
FOXP3	50943	Acute interstitial pneumonia	C1279945	disease	Respiratory Tract Diseases	Disease or Syndrome	88	8	0.02		1	2	0	2009	2011
FOXP3	50943	Malignant neoplasm of gastrointestinal tract	C0685938	disease	Digestive System Diseases; Neoplasms	Neoplastic Process	423	55	0.02		1	2	0	2014	2018
FOXP3	50943	Ki-1+ Anaplastic Large Cell Lymphoma	C0206180	disease	Neoplasms; Immune System Diseases; Hemic and Lymphatic Diseases	Neoplastic Process	300	10	0.02		1	2	0	2019	2020
FOXP3	50943	Sleep Apnea, Central	C0520680	disease	Respiratory Tract Diseases; Nervous System Diseases	Disease or Syndrome	122	17	0.02		1	2	0	2017	2018
FOXP3	50943	Hepatitis B, Chronic	C0524909	disease	Digestive System Diseases; Infections	Disease or Syndrome	415	84	0.02		1	2	0	2011	2011
FOXP3	50943	Hepatitis C, Chronic	C0524910	disease	Digestive System Diseases; Infections	Disease or Syndrome	430	80	0.02		1	2	0	2009	2015
FOXP3	50943	Cholangiocarcinoma	C0206698	disease	Neoplasms	Neoplastic Process	877	43	0.02		1	2	0	2012	2014
FOXP3	50943	Cervical Intraepithelial Neoplasia	C0206708	disease	Neoplasms	Neoplastic Process	398	29	0.02		1	2	0	2009	2018
FOXP3	50943	Thyroid associated opthalmopathies	C0339143	disease	Congenital, Hereditary, and Neonatal Diseases and Abnormalities; Eye Diseases; Immune System Diseases; Endocrine System Diseases	Disease or Syndrome	211	49	0.02		1	2	0	2015	2017
FOXP3	50943	Autoimmune Lymphoproliferative Syndrome	C1328840	disease	Congenital, Hereditary, and Neonatal Diseases and Abnormalities; Immune System Diseases; Hemic and Lymphatic Diseases	Disease or Syndrome	65	22	0.02		0.5	2	0	2008	2008
FOXP3	50943	Malignant transformation	C1608408	phenotype		Neoplastic Process	1027	20	0.02		1	2	0	2008	2010
FOXP3	50943	Primary sclerosing cholangitis	C0566602	disease	Digestive System Diseases	Disease or Syndrome	264	58	0.02		1	2	0	2007	2014
FOXP3	50943	Human immunodeficiency virus (HIV) II infection category B1	C3854222	disease		Disease or Syndrome	985	56	0.02		1	2	0	2008	2008
FOXP3	50943	Connective Tissue Diseases	C0009782	group	Skin and Connective Tissue Diseases	Disease or Syndrome	188	24	0.02		1	2	1	2014	2018
FOXP3	50943	Chronic rhinosinusitis with nasal polyps	C4524092	disease		Neoplastic Process	168	1	0.02		0.5	2	0	2017	2019
FOXP3	50943	Hemophilia A	C0019069	disease	Congenital, Hereditary, and Neonatal Diseases and Abnormalities; Hemic and Lymphatic Diseases	Disease or Syndrome	143	295	0.02		1	2	0	2009	2019
FOXP3	50943	Lichen Planus	C0023646	disease	Skin and Connective Tissue Diseases	Disease or Syndrome	106	4	0.02		1	2	0	2019	2019
FOXP3	50943	Acute monocytic leukemia	C0023465	disease	Neoplasms	Neoplastic Process	633	22	0.02		1	2	0	2016	2017
FOXP3	50943	Chorioamnionitis	C0008495	phenotype	Congenital, Hereditary, and Neonatal Diseases and Abnormalities; Female Urogenital Diseases and Pregnancy Complications	Disease or Syndrome	132	2	0.02		1	2	0	2015	2017
FOXP3	50943	polyps	C0032584	phenotype	Pathological Conditions, Signs and Symptoms	Anatomical Abnormality	390	18	0.02		1	2	0	2016	2018
FOXP3	50943	Merkel cell carcinoma	C0007129	disease	Neoplasms; Infections	Neoplastic Process	226	10	0.02		1	2	0	2012	2020
FOXP3	50943	Noninfiltrating Intraductal Carcinoma	C0007124	disease	Neoplasms	Neoplastic Process	486	13	0.02		1	2	0	2007	2015
FOXP3	50943	Nematode infections	C0027583	group	Infections	Disease or Syndrome	33	0	0.02		1	2	0	2011	2017
FOXP3	50943	Malignant neoplasm of endometrium	C0007103	disease	Neoplasms; Female Urogenital Diseases and Pregnancy Complications	Neoplastic Process	1235	197	0.02		1	2	1	2018	2019
FOXP3	50943	Brain Neoplasms	C0006118	group	Neoplasms; Nervous System Diseases	Neoplastic Process	1018	204	0.02		1	2	1	2012	2019
FOXP3	50943	Leprosy, Lepromatous	C0023348	disease	Infections	Disease or Syndrome	94	17	0.02		0.5	2	0	2016	2017
FOXP3	50943	Hepatitis A	C0019159	disease	Digestive System Diseases; Infections	Disease or Syndrome	451	27	0.02		1	2	0	2019	2019
FOXP3	50943	Periapical Granuloma	C0031029	disease	Stomatognathic Diseases	Disease or Syndrome	41	0	0.02		1	2	0	2015	2016
FOXP3	50943	Liver Cirrhosis	C0023890	disease	Pathological Conditions, Signs and Symptoms; Digestive System Diseases	Disease or Syndrome	1182	189	0.02		1	2	0	2015	2016
FOXP3	50943	Monoclonal Gammopathy of Undetermined Significance	C0026470	disease	Immune System Diseases; Hemic and Lymphatic Diseases	Neoplastic Process	227	20	0.02		1	2	0	2006	2015
FOXP3	50943	Mucocutaneous Lymph Node Syndrome	C0026691	disease	Skin and Connective Tissue Diseases; Hemic and Lymphatic Diseases; Cardiovascular Diseases	Disease or Syndrome	370	195	0.02		0.5	2	1	2010	2010
FOXP3	50943	Lung Neoplasms	C0024121	group	Neoplasms; Respiratory Tract Diseases	Neoplastic Process	1486	39	0.02		1	2	0	2006	2012
FOXP3	50943	Nephritis	C0027697	disease	Female Urogenital Diseases and Pregnancy Complications; Male Urogenital Diseases	Disease or Syndrome	296	40	0.02		1	2	0	2015	2020
FOXP3	50943	Enteritis	C0014335	disease	Digestive System Diseases	Disease or Syndrome	85	2	0.02		1	2	0	2018	2018
FOXP3	50943	Encephalitis, St. Louis	C0014060	disease	Infections; Nervous System Diseases	Disease or Syndrome	272	34	0.02		1	2	0	2015	2019
FOXP3	50943	Congestive heart failure	C0018802	disease	Cardiovascular Diseases	Disease or Syndrome	1760	165	0.02		1	2	0	2011	2017
FOXP3	50943	Degenerative polyarthritis	C0029408	disease	Musculoskeletal Diseases	Disease or Syndrome	1827	247	0.02		1	2	2	2018	2018
FOXP3	50943	Helminthiasis	C0018889	disease	Infections	Disease or Syndrome	59	1	0.02		0.5	2	0	2015	2018
FOXP3	50943	Osteopenia	C0029453	disease	Nutritional and Metabolic Diseases; Musculoskeletal Diseases	Disease or Syndrome	845	61	0.02		1	2	0	2010	2010
FOXP3	50943	Autoimmune polyendocrinopathy syndrome, type 1	C3494489	disease	Immune System Diseases; Endocrine System Diseases	Disease or Syndrome	18	1	0.02		0.5	2	0	2006	2008
FOXP3	50943	Dermatitis	C0011603	disease	Skin and Connective Tissue Diseases	Disease or Syndrome	496	16	0.02		1	2	0	2007	2015
FOXP3	50943	Cytomegalovirus Infections	C0010823	group	Infections	Disease or Syndrome	462	26	0.02		1	2	1	2016	2017
FOXP3	50943	Peptic Ulcer	C0030920	disease	Digestive System Diseases	Disease or Syndrome	150	25	0.02		1	2	1	2017	2018
FOXP3	50943	Bladder Neoplasm	C0005695	disease	Neoplasms; Female Urogenital Diseases and Pregnancy Complications; Male Urogenital Diseases	Neoplastic Process	2130	281	0.02		1	2	0	2016	2016
FOXP3	50943	Malignant neoplasm of urinary bladder	C0005684	disease	Neoplasms; Female Urogenital Diseases and Pregnancy Complications; Male Urogenital Diseases	Neoplastic Process	2113	316	0.02		1	2	0	2016	2016
FOXP3	50943	Astrocytoma	C0004114	disease	Neoplasms	Neoplastic Process	985	59	0.02		1	2	0	2007	2020
FOXP3	50943	Renal fibrosis	C0151650	disease	Pathological Conditions, Signs and Symptoms; Female Urogenital Diseases and Pregnancy Complications; Male Urogenital Diseases	Disease or Syndrome	570	1	0.02		1	2	0	2009	2017
FOXP3	50943	Chronic kidney disease stage 5	C2316810	disease	Female Urogenital Diseases and Pregnancy Complications; Male Urogenital Diseases	Disease or Syndrome	666	194	0.02		1	2	2	2009	2016
FOXP3	50943	Influenza	C0021400	disease	Infections; Respiratory Tract Diseases	Disease or Syndrome	858	17	0.02		1	2	0	2012	2014
FOXP3	50943	Acute colitis	C2118460	disease	Digestive System Diseases	Disease or Syndrome	83	0	0.02		1	2	0	2007	2007
FOXP3	50943	Severe Combined Immunodeficiency	C0085110	disease	Congenital, Hereditary, and Neonatal Diseases and Abnormalities; Nutritional and Metabolic Diseases; Immune System Diseases	Disease or Syndrome	284	46	0.02		1	2	0	2008	2016
FOXP3	50943	Hypertensive disease	C0020538	group	Cardiovascular Diseases	Disease or Syndrome	2322	1085	0.02		1	2	0	2018	2018
FOXP3	50943	Irritable Bowel Syndrome	C0022104	disease	Digestive System Diseases	Disease or Syndrome	429	52	0.02		1	2	0	2007	2016
FOXP3	50943	Hypogammaglobulinemia	C0086438	disease	Immune System Diseases; Hemic and Lymphatic Diseases	Disease or Syndrome	76	2	0.02		1	2	0	2011	2016
FOXP3	50943	Precursor T-Cell Lymphoblastic Leukemia-Lymphoma	C1961099	disease	Neoplasms; Immune System Diseases; Hemic and Lymphatic Diseases	Neoplastic Process	644	23	0.02		1	2	0	2016	2016
FOXP3	50943	HER2-positive carcinoma of breast	C1960398	disease	Neoplasms; Skin and Connective Tissue Diseases	Neoplastic Process	288	26	0.02		1	2	0	2018	2018
FOXP3	50943	Latent autoimmune diabetes mellitus in adult	C1960272	disease	Nutritional and Metabolic Diseases; Immune System Diseases; Endocrine System Diseases	Disease or Syndrome	49	12	0.02		1	2	0	2007	2011
FOXP3	50943	Adenocarcinoma	C0001418	group	Neoplasms	Neoplastic Process	2235	168	0.02		1	2	0	2008	2018
FOXP3	50943	Inflammation	C0021368	phenotype	Pathological Conditions, Signs and Symptoms	Pathologic Function	467	0	0.02		1	2	0	2006	2008
FOXP3	50943	Uveitis	C0042164	disease	Eye Diseases	Disease or Syndrome	247	43	0.02		1	2	0	2009	2015
FOXP3	50943	Autoimmune pancreatitis	C2609129	disease	Digestive System Diseases; Immune System Diseases	Disease or Syndrome	49	3	0.02		0.5	2	0	2011	2016
FOXP3	50943	Alzheimer's Disease	C0002395	disease	Nervous System Diseases; Mental Disorders	Disease or Syndrome	3397	1843	0.02		1	2	0	2016	2019
FOXP3	50943	Dermatologic disorders	C0037274	group	Skin and Connective Tissue Diseases	Disease or Syndrome	617	21	0.02		1	2	0	2008	2010
FOXP3	50943	Kidney Failure, Chronic	C0022661	disease	Female Urogenital Diseases and Pregnancy Complications; Male Urogenital Diseases	Disease or Syndrome	827	425	0.02		1	2	2	2009	2016
FOXP3	50943	Melanoma, B16	C0004565	disease	Neoplasms	Neoplastic Process; Experimental Model of Disease	157	1	0.02		1	2	0	2010	2017
FOXP3	50943	Barrett Esophagus	C0004763	disease	Digestive System Diseases; Neoplasms	Disease or Syndrome	478	60	0.02		1	2	0	2018	2020
FOXP3	50943	Hypercholesterolemia	C0020443	disease	Nutritional and Metabolic Diseases	Disease or Syndrome	489	123	0.02		1	2	0	2015	2017
FOXP3	50943	Carcinoma, Ovarian Epithelial	C4721610	disease	Neoplasms; Female Urogenital Diseases and Pregnancy Complications; Endocrine System Diseases	Neoplastic Process	2841	327	0.02		1	2	0	2005	2010
FOXP3	50943	Histiocytosis, Langerhans-Cell	C0019621	disease	Respiratory Tract Diseases; Hemic and Lymphatic Diseases	Neoplastic Process	104	12	0.02		1	2	0	2010	2014
FOXP3	50943	Leishmaniasis, Cutaneous	C0023283	disease	Infections; Skin and Connective Tissue Diseases	Disease or Syndrome	102	17	0.02		1	2	0	2013	2018
FOXP3	50943	Actinic keratosis	C0022602	disease	Neoplasms; Skin and Connective Tissue Diseases	Neoplastic Process	136	10	0.02		1	2	0	2008	2018
FOXP3	50943	Respiratory syncytial virus (RSV) infection in conditions classified elsewhere and of unspecified site	C0375023	disease		Disease or Syndrome	467	14	0.02		1	2	0	2018	2018
FOXP3	50943	Immunoglobulin G4-Related Disease	C4087124	disease	Immune System Diseases	Disease or Syndrome	80	2	0.01		1	1	0	2019	2019
FOXP3	50943	Systemic immune activation	C4049273	disease		Disease or Syndrome	23	0	0.01		1	1	0	2012	2012
FOXP3	50943	Childhood Astrocytoma	C4086152	disease	Neoplasms	Neoplastic Process	615	39	0.01		1	1	0	2007	2007
FOXP3	50943	Adult Langerhans Cell Histiocytosis	C3900100	disease	Respiratory Tract Diseases; Hemic and Lymphatic Diseases	Neoplastic Process	40	2	0.01		1	1	0	2014	2014
FOXP3	50943	Necrotizing enterocolitis in fetus OR newborn	C4082937	disease	Digestive System Diseases	Disease or Syndrome	210	26	0.01		1	1	0	2017	2017
FOXP3	50943	Childhood Langerhans Cell Histiocytosis	C3899655	disease	Respiratory Tract Diseases; Hemic and Lymphatic Diseases	Neoplastic Process	40	2	0.01		1	1	0	2014	2014
FOXP3	50943	Tumour budding	C4049272	disease		Neoplastic Process	71	8	0.01		1	1	0	2011	2011
FOXP3	50943	Lymphocytic infiltration	C1262091	disease		Disease or Syndrome	84	2	0.01		1	1	0	2014	2014
FOXP3	50943	Clear-cell metastatic renal cell carcinoma	C2931852	disease	Neoplasms; Female Urogenital Diseases and Pregnancy Complications; Male Urogenital Diseases	Neoplastic Process	260	11	0.01		1	1	0	2018	2018
FOXP3	50943	Skin Erosion	C3887524	disease	Skin and Connective Tissue Diseases	Disease or Syndrome	225	2	0.01		1	1	0	2017	2017
FOXP3	50943	Large cell neuroendocrine carcinoma	C1265996	disease	Neoplasms	Neoplastic Process	91	3	0.01		1	1	0	2018	2018
FOXP3	50943	Sarcoma	C1261473	group	Neoplasms	Neoplastic Process	853	42	0.01		1	1	0	2017	2017
FOXP3	50943	Refractory anemia with ringed sideroblasts	C1264195	disease	Hemic and Lymphatic Diseases	Neoplastic Process	36	3	0.01		1	1	0	2015	2015
FOXP3	50943	CTLA4 Haploinsufficiency	C4015214	disease	Immune System Diseases	Disease or Syndrome	6	7	0.01		1	1	0	2014	2014
FOXP3	50943	Serous Tubal Intraepithelial Carcinoma	C4287589	disease		Neoplastic Process	33	0	0.01		1	1	0	2019	2019
FOXP3	50943	Stage 4S neuroblastoma	C1135161	disease		Neoplastic Process	45	0	0.01		1	1	0	2015	2015
FOXP3	50943	Influenza A virus infection	C0858004	disease	Infections; Respiratory Tract Diseases	Disease or Syndrome	117	1	0.01		1	1	0	2012	2012
FOXP3	50943	Leishmania donovani disease	C0857306	disease		Disease or Syndrome	16	0	0.01		1	1	0	2018	2018
FOXP3	50943	Scirrhous gastric carcinoma	C0857002	disease	Digestive System Diseases; Neoplasms	Neoplastic Process	11	0	0.01		1	1	0	2012	2012
FOXP3	50943	Secondary malignant neoplasm of colon and/or rectum	C4721579	disease	Digestive System Diseases; Neoplasms	Neoplastic Process	397	68	0.01		1	1	0	2010	2010
FOXP3	50943	Carbamoyl-Phosphate Synthase I Deficiency Disease	C0751753	disease	Congenital, Hereditary, and Neonatal Diseases and Abnormalities; Nutritional and Metabolic Diseases; Nervous System Diseases	Disease or Syndrome	18	0	0.01		1	1	0	2012	2012
FOXP3	50943	Metastatic Renal Cell Carcinoma	C4721698	disease	Neoplasms; Female Urogenital Diseases and Pregnancy Complications; Male Urogenital Diseases	Neoplastic Process	144	9	0.01		1	1	0	2012	2012
FOXP3	50943	Adenocarcinoma of lung, stage IV	C0854988	disease		Neoplastic Process	19	6	0.01		1	1	0	2017	2017
FOXP3	50943	Primary differentiated carcinoma of thyroid gland	C4722172	disease		Neoplastic Process	167	41	0.01		1	1	0	2017	2017
FOXP3	50943	Metastatic Neuroblastoma	C4722306	disease	Neoplasms	Neoplastic Process	31	0	0.01		1	1	0	2015	2015
FOXP3	50943	Pregnancy associated hypertension	C0852036	phenotype	Female Urogenital Diseases and Pregnancy Complications; Cardiovascular Diseases	Disease or Syndrome	186	43	0.01		1	1	0	2018	2018
FOXP3	50943	Infection caused by Helicobacter pylori	C0850666	disease	Infections	Disease or Syndrome	337	56	0.01		1	1	0	2014	2014
FOXP3	50943	Metastatic Breast Carcinoma	C4723838	disease	Neoplasms; Skin and Connective Tissue Diseases	Neoplastic Process	61	1	0.01		1	1	0	2013	2013
FOXP3	50943	CTLA4 deficiency	C4728035	disease		Disease or Syndrome	8	0	0.01		1	1	0	2018	2018
FOXP3	50943	HER2-negative breast cancer	C4733095	disease		Neoplastic Process	160	18	0.01		1	1	0	2018	2018
FOXP3	50943	Distal colitis	C0860168	disease	Digestive System Diseases	Disease or Syndrome	6	3	0.01		1	1	0	2018	2018
FOXP3	50943	Lymphoma, Non-Hodgkin, Familial	C4721532	disease	Neoplasms; Immune System Diseases; Hemic and Lymphatic Diseases	Neoplastic Process	462	79	0.01		1	1	0	2011	2011
FOXP3	50943	DOCK8 Deficiency	C4289709	disease	Congenital, Hereditary, and Neonatal Diseases and Abnormalities; Immune System Diseases; Hemic and Lymphatic Diseases	Disease or Syndrome	18	0	0.01		1	1	0	2017	2017
FOXP3	50943	Rhinosinusitis	C0948780	disease	Infections; Respiratory Tract Diseases; Otorhinolaryngologic Diseases	Disease or Syndrome	38	1	0.01		1	1	0	2018	2018
FOXP3	50943	Chronic Active EBV Infection of T-and NK-Cell Type, Systemic Form	C4289792	disease	Infections	Disease or Syndrome	22	0	0.01		1	1	0	2004	2004
FOXP3	50943	K ATP Permanent Neonatal Diabetes	C4321446	disease		Disease or Syndrome	8	2	0.01		1	1	0	2009	2009
FOXP3	50943	Cystic Echinocccosis	C4553297	disease	Infections	Disease or Syndrome	26	1	0.01		1	1	0	2019	2019
FOXP3	50943	SCLEROSING CHOLANGITIS, NEONATAL	C4479344	disease		Disease or Syndrome	39	9	0.01		1	1	0	2020	2020
FOXP3	50943	MiT family translocation renal cell carcinoma	C4518356	disease	Neoplasms; Female Urogenital Diseases and Pregnancy Complications; Male Urogenital Diseases	Neoplastic Process	33	0	0.01		1	1	0	2019	2019
FOXP3	50943	Congenital atresia of extrahepatic bile duct	C4520983	disease	Congenital, Hereditary, and Neonatal Diseases and Abnormalities; Digestive System Diseases	Congenital Abnormality	172	19	0.01		1	1	0	2016	2016
FOXP3	50943	MSI-high	C4523846	disease		Neoplastic Process	83	9	0.01		1	1	0	2014	2014
FOXP3	50943	Ischemic stroke	C0948008	disease	Nervous System Diseases; Cardiovascular Diseases	Disease or Syndrome	1159	704	0.01		1	1	0	2018	2018
FOXP3	50943	precancerous lesions	C0940937	phenotype		Neoplastic Process	270	19	0.01		1	1	0	2015	2015
FOXP3	50943	Stage III Colon Cancer AJCC v8	C4525124	disease		Neoplastic Process	42	3	0.01		1	1	0	2017	2017
FOXP3	50943	Cytokine storm	C0919747	disease		Disease or Syndrome	97	0	0.01		1	1	0	2004	2004
FOXP3	50943	Sarcoma of soft tissue	C4551687	group	Neoplasms	Neoplastic Process	258	6	0.01		1	1	0	2017	2017
FOXP3	50943	Multiple Sclerosis, Secondary Progressive	C0751965	disease	Immune System Diseases; Nervous System Diseases	Disease or Syndrome	20	0	0.01		1	1	0	2006	2006
FOXP3	50943	Inverted Squamous Cell Papilloma	C1881254	disease	Neoplasms	Neoplastic Process	46	1	0.01		1	1	0	2019	2019
FOXP3	50943	Papillary Thyroid Microcarcinoma	C1709457	disease	Neoplasms; Endocrine System Diseases	Neoplastic Process	46	2	0.01		1	1	0	2014	2014
FOXP3	50943	Direct Contact Transmission Infection	C1707758	disease	Pathological Conditions, Signs and Symptoms; Infections	Disease or Syndrome	13	0	0.01		1	1	0	2008	2008
FOXP3	50943	Nephrotic Syndrome, Minimal Change	C1704321	disease	Female Urogenital Diseases and Pregnancy Complications; Male Urogenital Diseases	Disease or Syndrome	85	10	0.01		1	1	0	2009	2009
FOXP3	50943	Benign Prostatic Hyperplasia	C1704272	disease	Male Urogenital Diseases	Disease or Syndrome	770	91	0.01		1	1	0	2009	2009
FOXP3	50943	Prostatic Hyperplasia	C2937421	disease	Male Urogenital Diseases	Disease or Syndrome	112	1	0.01		1	1	0	2009	2009
FOXP3	50943	Oestrogen receptor positive breast cancer	C2938924	disease		Neoplastic Process	510	58	0.01		1	1	0	2012	2012
FOXP3	50943	HCV coinfection	C1698259	disease		Disease or Syndrome	37	5	0.01		1	1	0	2014	2014
FOXP3	50943	tumor vasculature	C1658953	phenotype		Neoplastic Process	200	0	0.01		1	1	0	2019	2019
FOXP3	50943	Cirrhosis	C1623038	disease	Pathological Conditions, Signs and Symptoms	Disease or Syndrome	919	110	0.01		1	1	0	2016	2016
FOXP3	50943	Ocular Adnexal Lymphoma	C2981712	disease	Neoplasms; Immune System Diseases; Hemic and Lymphatic Diseases	Neoplastic Process	9	0	0.01		1	1	0	2011	2011
FOXP3	50943	Latent Tuberculosis	C1609538	disease	Infections	Disease or Syndrome	183	18	0.01		1	1	0	2015	2015
FOXP3	50943	Early-Stage Breast Carcinoma	C2986665	disease	Neoplasms; Skin and Connective Tissue Diseases	Neoplastic Process	142	7	0.01		1	1	0	2017	2017
FOXP3	50943	Stage III Colon Cancer AJCC v7	C3146254	disease		Neoplastic Process	42	3	0.01		1	1	0	2017	2017
FOXP3	50943	Autoimmune arthritis	C3160909	disease		Disease or Syndrome	113	0	0.01		1	1	0	2010	2010
FOXP3	50943	Tendinopathy	C1568272	disease	Musculoskeletal Diseases; Wounds and Injuries	Disease or Syndrome	80	16	0.01		1	1	0	2018	2018
FOXP3	50943	Leprosy, Multibacillary	C1562585	disease	Infections	Disease or Syndrome	34	16	0.01		1	1	0	2016	2016
FOXP3	50943	Primary Cutaneous Diffuse Large B-Cell Lymphoma, Leg Type	C1709656	disease		Neoplastic Process	23	4	0.01		1	1	0	2018	2018
FOXP3	50943	Latent Autoimmune Diabetes in Adults	C1739108	disease	Nutritional and Metabolic Diseases; Immune System Diseases; Endocrine System Diseases	Disease or Syndrome	39	12	0.01		1	1	0	2011	2011
FOXP3	50943	Echogenic Bowel	C2936423	disease	Congenital, Hereditary, and Neonatal Diseases and Abnormalities; Female Urogenital Diseases and Pregnancy Complications	Congenital Abnormality	4	1	0.01		1	1	0	2017	2017
FOXP3	50943	Osteophyte	C1956089	disease	Musculoskeletal Diseases	Disease or Syndrome	91	0	0.01		1	1	0	2017	2017
FOXP3	50943	Extrahepatic Cholangiocarcinoma	C3805278	disease	Neoplasms	Neoplastic Process	119	3	0.01		1	1	0	2012	2012
FOXP3	50943	Interleukin 2 Receptor, Alpha, Deficiency of	C1853392	disease	Immune System Diseases	Disease or Syndrome	4	5	0.01		1	1	0	2007	2007
FOXP3	50943	PTEN Hamartoma Tumor Syndrome	C1959582	disease	Congenital, Hereditary, and Neonatal Diseases and Abnormalities; Neoplasms	Neoplastic Process	17	194	0.01		1	1	0	2017	2017
FOXP3	50943	MYELOPROLIFERATIVE DISORDER, CHRONIC, WITH EOSINOPHILIA	C1851585	disease	Hemic and Lymphatic Diseases	Disease or Syndrome	119	5	0.01		1	1	0	2015	2015
FOXP3	50943	Influenza A	C2062441	disease		Disease or Syndrome	563	19	0.01		1	1	0	2012	2012
FOXP3	50943	Autoimmune Primary Adrenal Insufficiency	C2103602	disease	Immune System Diseases; Endocrine System Diseases	Disease or Syndrome	41	18	0.01		0	1	0	2006	2006
FOXP3	50943	Pediatric failure to thrive	C2315100	disease	Pathological Conditions, Signs and Symptoms; Nutritional and Metabolic Diseases; Mental Disorders	Disease or Syndrome	166	122	0.01		1	1	0	2015	2015
FOXP3	50943	Adult Classical Hodgkin Lymphoma	C2347747	disease	Neoplasms; Immune System Diseases; Hemic and Lymphatic Diseases	Neoplastic Process	233	10	0.01		1	1	0	2016	2016
FOXP3	50943	Idiopathic Interstitial Pneumonias	C2350236	disease	Respiratory Tract Diseases	Disease or Syndrome	64	4	0.01		1	1	2	2018	2018
FOXP3	50943	Steroid Sulfatase Deficiency Disease	C2717836	disease	Congenital, Hereditary, and Neonatal Diseases and Abnormalities; Nutritional and Metabolic Diseases; Skin and Connective Tissue Diseases	Disease or Syndrome	181	5	0.01		1	1	0	2019	2019
FOXP3	50943	Anti-Neutrophil Cytoplasmic Antibody-Associated Vasculitis	C2717865	disease	Immune System Diseases; Cardiovascular Diseases	Disease or Syndrome	86	3	0.01		1	1	0	2020	2020
FOXP3	50943	DIABETES MELLITUS, PERMANENT NEONATAL	C1833104	disease	Nutritional and Metabolic Diseases; Endocrine System Diseases	Disease or Syndrome	20	108	0.01		1	1	0	2009	2009
FOXP3	50943	Autoimmune disease (systemic) NOS	C2895206	disease		Disease or Syndrome	37	3	0.01		1	1	0	2015	2015
FOXP3	50943	IgE-mediated allergic asthma	C1827849	disease	Immune System Diseases	Disease or Syndrome	133	46	0.01		1	1	0	2015	2015
FOXP3	50943	Carcinoma of urinary bladder, invasive	C1827293	disease	Neoplasms; Female Urogenital Diseases and Pregnancy Complications; Male Urogenital Diseases	Neoplastic Process	287	14	0.01		1	1	0	2018	2018
FOXP3	50943	Idiopathic pulmonary arterial hypertension	C3203102	disease	Respiratory Tract Diseases	Disease or Syndrome	776	24	0.01		1	1	0	2017	2017
FOXP3	50943	Chronic Kidney Diseases	C1561643	group	Female Urogenital Diseases and Pregnancy Complications; Male Urogenital Diseases	Disease or Syndrome	1074	306	0.01		1	1	0	2018	2018
FOXP3	50943	Ocular Adnexal Mucosa-Associated Lymphoid Tissue Lymphoma	C1335103	disease	Neoplasms; Immune System Diseases; Hemic and Lymphatic Diseases	Neoplastic Process	14	0	0.01		1	1	0	2011	2011
FOXP3	50943	Inflammatory dermatosis	C3875321	disease	Skin and Connective Tissue Diseases	Disease or Syndrome	382	6	0.01		1	1	0	2007	2007
FOXP3	50943	Intracranial Germinoma	C1334240	disease		Neoplastic Process	6	0	0.01		1	1	0	2018	2018
FOXP3	50943	Classical Hodgkin's Lymphoma	C1333064	disease	Neoplasms; Immune System Diseases; Hemic and Lymphatic Diseases	Neoplastic Process	285	20	0.01		1	1	0	2016	2016
FOXP3	50943	Childhood Osteosarcoma	C1332986	disease	Neoplasms	Neoplastic Process	2208	151	0.01		1	1	0	2010	2010
FOXP3	50943	Laryngeal cleft	C1840311	disease	Congenital, Hereditary, and Neonatal Diseases and Abnormalities	Congenital Abnormality	72	4	0.01		1	1	0	2008	2008
FOXP3	50943	Failure to thrive in infant	C3887638	disease	Pathological Conditions, Signs and Symptoms	Disease or Syndrome	81	4	0.01		1	1	0	2015	2015
FOXP3	50943	Adult Primary Cutaneous Anaplastic Large Cell Lymphoma	C1332214	disease	Neoplasms; Immune System Diseases; Hemic and Lymphatic Diseases	Neoplastic Process	12	0	0.01		1	1	0	2019	2019
FOXP3	50943	Recurrent hepatitis	C3887641	disease	Digestive System Diseases	Disease or Syndrome	35	5	0.01		1	1	0	2012	2012
FOXP3	50943	Autoimmune uveitis	C3888523	disease		Disease or Syndrome	31	0	0.01		1	1	0	2019	2019
FOXP3	50943	Stromal keratitis	C1318020	disease	Eye Diseases	Disease or Syndrome	15	0	0.01		1	1	0	2019	2019
FOXP3	50943	Eosinophilic disorder	C1306759	group	Hemic and Lymphatic Diseases	Disease or Syndrome	288	22	0.01		1	1	0	2017	2017
FOXP3	50943	Autoimmune colitis	C3888552	disease		Disease or Syndrome	12	0	0.01		1	1	0	2010	2010
FOXP3	50943	Spindle cell hemangioma	C1304508	disease	Neoplasms	Neoplastic Process	68	10	0.01		1	1	0	2017	2017
FOXP3	50943	Adenoma of large intestine	C1302401	disease	Digestive System Diseases; Neoplasms	Neoplastic Process	452	213	0.01		1	1	0	2016	2016
FOXP3	50943	Non-Metastatic Childhood Soft Tissue Sarcoma	C3898127	disease		Neoplastic Process	160	3	0.01		1	1	0	2017	2017
FOXP3	50943	Pancreatic Ductal Adenocarcinoma	C1335302	disease	Digestive System Diseases; Neoplasms; Endocrine System Diseases	Neoplastic Process	970	22	0.01		1	1	0	2007	2007
FOXP3	50943	Carcinoma of urinary bladder, superficial	C1336527	disease	Neoplasms; Female Urogenital Diseases and Pregnancy Complications; Male Urogenital Diseases	Neoplastic Process	66	6	0.01		1	1	0	2016	2016
FOXP3	50943	Differentiated Thyroid Gland Carcinoma	C1337013	disease		Neoplastic Process	245	80	0.01		1	1	0	2017	2017
FOXP3	50943	Polyglandular Type III Autoimmune Syndrome	C1535942	disease	Immune System Diseases; Endocrine System Diseases	Disease or Syndrome	10	0	0.01		1	1	0	2015	2015
FOXP3	50943	Multiple Chronic Conditions	C3266262	disease	Pathological Conditions, Signs and Symptoms	Disease or Syndrome	929	42	0.01		1	1	0	2017	2017
FOXP3	50943	Autoinflammatory disease	C3267073	disease		Disease or Syndrome	81	10	0.01		1	1	0	2011	2011
FOXP3	50943	Plasmablastic lymphoma	C3472614	disease	Neoplasms; Immune System Diseases; Hemic and Lymphatic Diseases	Neoplastic Process	47	0	0.01		1	1	0	2017	2017
FOXP3	50943	Tumor Angiogenesis	C1519670	phenotype	Pathological Conditions, Signs and Symptoms	Neoplastic Process	822	5	0.01		1	1	0	2017	2017
FOXP3	50943	Granulomatosis with polyangiitis	C3495801	disease	Respiratory Tract Diseases; Immune System Diseases; Cardiovascular Diseases	Disease or Syndrome	126	18	0.01		1	1	0	2019	2019
FOXP3	50943	T-CELL IMMUNODEFICIENCY, RECURRENT INFECTIONS, AND AUTOIMMUNITY WITH OR WITHOUT CARDIAC MALFORMATIONS	C3553943	disease		Disease or Syndrome	8	1	0.01		1	1	0	2014	2014
FOXP3	50943	Bile duct hyperplasia	C3672440	disease		Disease or Syndrome	9	0	0.01		1	1	0	2018	2018
FOXP3	50943	HER2 gene amplification	C1512127	disease		Disease or Syndrome	170	14	0.01		1	1	0	2007	2007
FOXP3	50943	Desmoplastic	C1511789	disease		Disease or Syndrome	117	4	0.01		1	1	0	2017	2017
FOXP3	50943	High grade serous carcinoma	C3839280	disease		Neoplastic Process	118	1	0.01		1	1	0	2019	2019
FOXP3	50943	Diminished ovarian reserve	C3839507	disease	Female Urogenital Diseases and Pregnancy Complications; Endocrine System Diseases	Disease or Syndrome	43	4	0.01		1	1	0	2017	2017
FOXP3	50943	Acute-On-Chronic Liver Failure	C3850141	disease	Digestive System Diseases	Disease or Syndrome	140	5	0.01		1	1	0	2014	2014
FOXP3	50943	Anal squamous cell carcinoma	C1412036	disease	Digestive System Diseases; Neoplasms	Neoplastic Process	39	0	0.01		1	1	0	2017	2017
FOXP3	50943	Epithelioma	C1368683	disease	Neoplasms	Neoplastic Process	326	2	0.01		1	1	0	2014	2014
FOXP3	50943	Renal Cell Carcinoma Associated with Xp11.2 Translocations/TFE3 Gene Fusions	C1337036	disease		Neoplastic Process	6	0	0.01		1	1	0	2019	2019
FOXP3	50943	Primary Cutaneous Anaplastic Large Cell Lymphoma	C1301362	disease	Neoplasms; Immune System Diseases; Hemic and Lymphatic Diseases	Neoplastic Process	24	0	0.01		1	1	0	2019	2019
FOXP3	50943	Lymphocytic Choriomeningitis	C0024266	disease	Infections; Nervous System Diseases	Disease or Syndrome	147	0	0.01		1	1	0	2013	2013
FOXP3	50943	oligodendroglioma	C0028945	disease	Neoplasms	Neoplastic Process	282	21	0.01		1	1	0	2020	2020
FOXP3	50943	Osteosarcoma	C0029463	disease	Neoplasms	Neoplastic Process	2283	178	0.01		1	1	0	2010	2010
FOXP3	50943	Panic Disorder	C0030319	disease	Mental Disorders	Mental or Behavioral Dysfunction	175	101	0.01		1	1	0	2016	2016
FOXP3	50943	Papilloma	C0030354	disease	Neoplasms	Neoplastic Process	273	27	0.01		1	1	0	2012	2012
FOXP3	50943	Parasitic Diseases	C0030499	group	Infections	Disease or Syndrome	164	2	0.01		1	1	0	2011	2011
FOXP3	50943	Pemphigus Vulgaris	C0030809	disease	Skin and Connective Tissue Diseases; Immune System Diseases	Disease or Syndrome	115	39	0.01		1	1	0	2014	2014
FOXP3	50943	Pericardial effusion	C0031039	disease	Cardiovascular Diseases	Disease or Syndrome	98	10	0.01		1	1	0	2017	2017
FOXP3	50943	Familial Mediterranean Fever	C0031069	disease	Congenital, Hereditary, and Neonatal Diseases and Abnormalities	Disease or Syndrome	133	82	0.01		1	1	0	2013	2013
FOXP3	50943	Periodontal Diseases	C0031090	group	Stomatognathic Diseases	Disease or Syndrome	326	22	0.01		1	1	0	2018	2018
FOXP3	50943	Pigeon Breeder's Lung	C0031903	disease	Respiratory Tract Diseases; Immune System Diseases; Occupational Diseases	Disease or Syndrome	5	0	0.01		1	1	0	2017	2017
FOXP3	50943	Post-kala-azar dermal leishmaniasis	C0032749	disease	Infections; Skin and Connective Tissue Diseases	Disease or Syndrome	28	0	0.01		1	1	0	2011	2011
FOXP3	50943	Obesity	C0028754	disease	Pathological Conditions, Signs and Symptoms; Nutritional and Metabolic Diseases	Disease or Syndrome	2821	1111	0.01		0	1	0	2019	2019
FOXP3	50943	Neuromyelitis Optica	C0027873	disease	Eye Diseases; Immune System Diseases; Nervous System Diseases	Disease or Syndrome	171	45	0.01		1	1	0	2019	2019
FOXP3	50943	Lymphoma, Follicular	C0024301	disease	Neoplasms; Immune System Diseases; Hemic and Lymphatic Diseases	Neoplastic Process	477	83	0.01		1	1	0	2006	2006
FOXP3	50943	Lymphoproliferative Disorders	C0024314	group	Immune System Diseases; Hemic and Lymphatic Diseases	Neoplastic Process	300	14	0.01		1	1	0	2001	2001
FOXP3	50943	Macular Edema, Cystoid	C0024440	disease	Eye Diseases	Disease or Syndrome	49	3	0.01		1	1	0	2009	2009
FOXP3	50943	Malaria, Falciparum	C0024535	disease	Infections	Disease or Syndrome	158	19	0.01		1	1	0	2009	2009
FOXP3	50943	Mitral Valve Stenosis	C0026269	disease	Cardiovascular Diseases	Disease or Syndrome	170	7	0.01		1	1	0	2015	2015
FOXP3	50943	Muscle Rigidity	C0026837	phenotype	Pathological Conditions, Signs and Symptoms; Musculoskeletal Diseases; Nervous System Diseases	Sign or Symptom	320	25	0.01		1	1	0	2019	2019
FOXP3	50943	Muscle Spasticity	C0026838	phenotype	Pathological Conditions, Signs and Symptoms; Musculoskeletal Diseases; Nervous System Diseases	Sign or Symptom	580	48	0.01		1	1	0	2006	2006
FOXP3	50943	Mycoses	C0026946	group	Infections	Disease or Syndrome	94	2	0.01		1	1	0	2018	2018
FOXP3	50943	Myocarditis	C0027059	disease	Cardiovascular Diseases	Disease or Syndrome	285	2	0.01		1	1	0	2018	2018
FOXP3	50943	Nephritis, Interstitial	C0027707	disease	Female Urogenital Diseases and Pregnancy Complications; Male Urogenital Diseases	Disease or Syndrome	79	5	0.01		1	1	0	2015	2015
FOXP3	50943	Neuralgia	C0027796	phenotype	Pathological Conditions, Signs and Symptoms; Nervous System Diseases	Sign or Symptom	767	16	0.01		1	1	0	2019	2019
FOXP3	50943	Precancerous Conditions	C0032927	group	Neoplasms	Neoplastic Process	471	18	0.01		1	1	0	2012	2012
FOXP3	50943	Pulmonary Emphysema	C0034067	disease	Respiratory Tract Diseases	Disease or Syndrome	352	64	0.01		0	1	0	2011	2011
FOXP3	50943	Pulmonary Fibrosis	C0034069	disease	Respiratory Tract Diseases	Disease or Syndrome	924	25	0.01		1	1	0	2010	2010
FOXP3	50943	Ichthyosis, X-Linked	C0079588	disease	Congenital, Hereditary, and Neonatal Diseases and Abnormalities; Nutritional and Metabolic Diseases; Skin and Connective Tissue Diseases	Disease or Syndrome	199	10	0.01		1	1	0	2019	2019
FOXP3	50943	B-Cell Lymphomas	C0079731	group	Neoplasms; Immune System Diseases; Hemic and Lymphatic Diseases	Neoplastic Process	1408	42	0.01		1	1	0	2019	2019
FOXP3	50943	Lymphoma, Large-Cell, Follicular	C0079745	disease	Neoplasms; Immune System Diseases; Hemic and Lymphatic Diseases	Neoplastic Process	153	6	0.01		1	1	0	2011	2011
FOXP3	50943	T-Cell Lymphoma	C0079772	disease	Neoplasms; Immune System Diseases; Hemic and Lymphatic Diseases	Neoplastic Process	485	24	0.01		1	1	0	2018	2018
FOXP3	50943	Pleural Effusion, Malignant	C0080032	disease	Neoplasms; Respiratory Tract Diseases	Disease or Syndrome	119	6	0.01		1	1	0	2005	2005
FOXP3	50943	Antiphospholipid Syndrome	C0085278	disease	Immune System Diseases	Disease or Syndrome	99	17	0.01		1	1	0	2018	2018
FOXP3	50943	Liver Failure	C0085605	disease	Digestive System Diseases	Disease or Syndrome	293	20	0.01		1	1	0	2019	2019
FOXP3	50943	Polymyositis	C0085655	disease	Musculoskeletal Diseases; Nervous System Diseases	Disease or Syndrome	183	22	0.01		1	1	0	2017	2017
FOXP3	50943	Pancreatitis, Chronic	C0149521	disease	Digestive System Diseases	Disease or Syndrome	379	56	0.01		1	1	0	2011	2011
FOXP3	50943	Epstein-Barr Virus Infections	C0149678	group	Infections	Disease or Syndrome	384	72	0.01		1	1	0	2017	2017
FOXP3	50943	Small cell carcinoma of lung	C0149925	disease	Neoplasms; Respiratory Tract Diseases	Neoplastic Process	972	125	0.01		1	1	0	2018	2018
FOXP3	50943	West Nile Fever	C0043124	disease	Infections; Nervous System Diseases	Disease or Syndrome	79	0	0.01		1	1	0	2017	2017
FOXP3	50943	Wasting Syndrome	C0043046	disease	Nutritional and Metabolic Diseases	Disease or Syndrome	26	2	0.01		0	1	0	2016	2016
FOXP3	50943	Respiratory Syncytial Virus Infections	C0035235	group	Infections	Disease or Syndrome	244	5	0.01		1	1	0	2018	2018
FOXP3	50943	Salmonella infections	C0036117	group	Infections	Disease or Syndrome	96	0	0.01		1	1	0	2019	2019
FOXP3	50943	Skin Diseases, Genetic	C0037277	group	Congenital, Hereditary, and Neonatal Diseases and Abnormalities; Skin and Connective Tissue Diseases	Disease or Syndrome	57	6	0.01		1	1	0	2004	2004
FOXP3	50943	Spinal Cord Diseases	C0037928	group	Nervous System Diseases	Disease or Syndrome	84	3	0.01		1	1	0	2006	2006
FOXP3	50943	Thymus Hyperplasia	C0040115	disease	Hemic and Lymphatic Diseases	Disease or Syndrome	30	1	0.01		1	1	0	2012	2012
FOXP3	50943	Thyroid Neoplasm	C0040136	disease	Neoplasms; Endocrine System Diseases	Neoplastic Process	1164	135	0.01		1	1	0	2018	2018
FOXP3	50943	Trachoma	C0040592	disease	Infections; Eye Diseases	Disease or Syndrome	39	3	0.01		1	1	0	2006	2006
FOXP3	50943	Pleural Tuberculosis	C0041326	disease	Infections; Respiratory Tract Diseases	Disease or Syndrome	59	0	0.01		1	1	0	2011	2011
FOXP3	50943	Turner Syndrome	C0041408	disease	Congenital, Hereditary, and Neonatal Diseases and Abnormalities; Female Urogenital Diseases and Pregnancy Complications; Male Urogenital Diseases; Endocrine System Diseases; Cardiovascular Diseases	Disease or Syndrome	162	21	0.01		1	1	0	2009	2009
FOXP3	50943	Uveomeningoencephalitic Syndrome	C0042170	disease	Eye Diseases; Immune System Diseases; Nervous System Diseases	Disease or Syndrome	102	27	0.01		1	1	0	2015	2015
FOXP3	50943	Vitamin A Deficiency	C0042842	disease	Nutritional and Metabolic Diseases	Disease or Syndrome	51	1	0.01		1	1	0	2016	2016
FOXP3	50943	Active tuberculosis	C0151332	disease	Infections	Disease or Syndrome	116	25	0.01		1	1	0	2007	2007
FOXP3	50943	Adenoma	C0001430	group	Neoplasms	Neoplastic Process	1183	103	0.01		1	1	0	2016	2016
FOXP3	50943	Basal cell carcinoma	C0007117	disease	Neoplasms	Neoplastic Process	108	109	0.01		1	1	0	2007	2007
FOXP3	50943	Cardiovascular Diseases	C0007222	group	Cardiovascular Diseases	Disease or Syndrome	1756	711	0.01		1	1	0	2016	2016
FOXP3	50943	Congenital chromosomal disease	C0008626	group	Congenital, Hereditary, and Neonatal Diseases and Abnormalities	Congenital Abnormality	757	47	0.01		1	1	1	2018	2018
FOXP3	50943	Chronic osteomyelitis	C0008707	disease	Infections; Musculoskeletal Diseases	Disease or Syndrome	21	12	0.01		1	1	0	2019	2019
FOXP3	50943	Colonic Neoplasms	C0009375	group	Digestive System Diseases; Neoplasms	Neoplastic Process	947	45	0.01		1	1	0	2018	2018
FOXP3	50943	Colorectal Neoplasms	C0009404	group	Digestive System Diseases; Neoplasms	Neoplastic Process	1296	609	0.01		1	1	0	2019	2019
FOXP3	50943	Condylomata Acuminata	C0009663	disease	Infections; Skin and Connective Tissue Diseases	Disease or Syndrome	73	0	0.01		1	1	0	2010	2010
FOXP3	50943	Phyllodes Tumor	C0010701	disease	Neoplasms	Neoplastic Process	100	1	0.01		1	1	0	2018	2018
FOXP3	50943	Diabetic Nephropathy	C0011881	disease	Female Urogenital Diseases and Pregnancy Complications; Male Urogenital Diseases; Endocrine System Diseases	Disease or Syndrome	1189	238	0.01		1	1	0	2011	2011
FOXP3	50943	Duodenitis	C0013298	disease	Digestive System Diseases	Disease or Syndrome	5	0	0.01		1	1	0	2019	2019
FOXP3	50943	Dyspepsia	C0013395	phenotype	Pathological Conditions, Signs and Symptoms	Sign or Symptom	61	5	0.01		1	1	0	2018	2018
FOXP3	50943	Malignant neoplasm of thyroid	C0007115	disease	Neoplasms; Endocrine System Diseases	Neoplastic Process	949	103	0.01		1	1	0	2018	2018
FOXP3	50943	Rectal Carcinoma	C0007113	disease	Digestive System Diseases; Neoplasms	Neoplastic Process	472	112	0.01		1	1	0	2019	2019
FOXP3	50943	Airway Obstruction	C0001883	group	Respiratory Tract Diseases	Disease or Syndrome	110	5	0.01		1	1	0	2018	2018
FOXP3	50943	Alopecia Areata	C0002171	disease	Skin and Connective Tissue Diseases	Disease or Syndrome	114	54	0.01		1	1	0	2014	2014
FOXP3	50943	Anemia, Hemolytic	C0002878	disease	Hemic and Lymphatic Diseases	Disease or Syndrome	154	31	0.01		1	1	0	2009	2009
FOXP3	50943	Anxiety Disorders	C0003469	group	Mental Disorders	Mental or Behavioral Dysfunction	840	163	0.01		1	1	0	2016	2016
FOXP3	50943	Aspergillosis, Allergic Bronchopulmonary	C0004031	disease	Infections; Respiratory Tract Diseases; Immune System Diseases	Disease or Syndrome	31	6	0.01		1	1	0	2009	2009
FOXP3	50943	Autistic Disorder	C0004352	disease	Mental Disorders	Mental or Behavioral Dysfunction	1112	395	0.01		1	1	0	2017	2017
FOXP3	50943	Pneumonia, Bacterial	C0004626	group	Infections; Respiratory Tract Diseases	Disease or Syndrome	66	2	0.01		1	1	0	2019	2019
FOXP3	50943	Behcet Syndrome	C0004943	disease	Congenital, Hereditary, and Neonatal Diseases and Abnormalities; Eye Diseases; Skin and Connective Tissue Diseases; Stomatognathic Diseases; Cardiovascular Diseases	Disease or Syndrome	502	243	0.01		1	1	0	2015	2015
FOXP3	50943	Biliary Atresia	C0005411	disease	Congenital, Hereditary, and Neonatal Diseases and Abnormalities; Digestive System Diseases	Congenital Abnormality	184	32	0.01		1	1	0	2016	2016
FOXP3	50943	Bowen's Disease	C0006079	disease	Neoplasms	Neoplastic Process	60	0	0.01		1	1	0	2008	2008
FOXP3	50943	Bronchiectasis	C0006267	disease	Respiratory Tract Diseases	Disease or Syndrome	190	15	0.01		0	1	0	2007	2007
FOXP3	50943	Esophageal Neoplasms	C0014859	group	Digestive System Diseases; Neoplasms	Neoplastic Process	1254	270	0.01		1	1	0	2011	2011
FOXP3	50943	External exotoses	C0015302	disease	Musculoskeletal Diseases	Disease or Syndrome	109	0	0.01		1	1	0	2017	2017
FOXP3	50943	Failure to Thrive	C0015544	disease	Pathological Conditions, Signs and Symptoms	Disease or Syndrome	842	10	0.01		1	1	0	2015	2015
FOXP3	50943	Hodgkin Disease	C0019829	disease	Neoplasms; Immune System Diseases; Hemic and Lymphatic Diseases	Neoplastic Process	900	148	0.01		1	1	0	2007	2007
FOXP3	50943	Infectious Mononucleosis	C0021345	disease	Infections; Immune System Diseases; Hemic and Lymphatic Diseases	Disease or Syndrome	58	4	0.01		1	1	0	2004	2004
FOXP3	50943	Intestinal Neoplasms	C0021841	group	Digestive System Diseases; Neoplasms	Neoplastic Process	182	2	0.01		1	1	0	2011	2011
FOXP3	50943	Intestinal Polyps	C0021846	phenotype	Pathological Conditions, Signs and Symptoms	Anatomical Abnormality	48	1	0.01		1	1	0	2011	2011
FOXP3	50943	Arthropathy	C0022408	group	Musculoskeletal Diseases	Disease or Syndrome	187	10	0.01		1	1	0	2011	2011
FOXP3	50943	Kidney Neoplasm	C0022665	disease	Neoplasms; Female Urogenital Diseases and Pregnancy Complications; Male Urogenital Diseases	Neoplastic Process	295	11	0.01		1	1	0	2018	2018
FOXP3	50943	Leishmaniasis	C0023281	disease	Infections; Skin and Connective Tissue Diseases	Disease or Syndrome	198	4	0.01		1	1	0	2009	2009
FOXP3	50943	Leprosy	C0023343	disease	Infections	Disease or Syndrome	190	120	0.01		1	1	0	2014	2014
FOXP3	50943	Chronic Lymphocytic Leukemia	C0023434	disease	Neoplasms; Immune System Diseases; Hemic and Lymphatic Diseases	Neoplastic Process	1447	291	0.01		1	1	0	2009	2009
FOXP3	50943	Liver neoplasms	C0023903	group	Digestive System Diseases; Neoplasms	Neoplastic Process	1424	7	0.01		1	1	0	2018	2018
FOXP3	50943	Lyme Disease	C0024198	disease	Infections	Disease or Syndrome	178	4	0.01		1	1	0	2007	2007
FOXP3	50943	Hepatic Veno-Occlusive Disease	C0019156	disease	Digestive System Diseases; Cardiovascular Diseases	Disease or Syndrome	37	2	0.01		1	1	1	2016	2016
FOXP3	50943	Hemorrhagic Fever with Renal Syndrome	C0019101	disease	Infections	Disease or Syndrome	51	1	0.01		1	1	0	2009	2009
FOXP3	50943	Fibrosarcoma	C0016057	disease	Neoplasms	Neoplastic Process	413	9	0.01		1	1	0	2015	2015
FOXP3	50943	Gastritis, Atrophic	C0017154	disease	Digestive System Diseases	Disease or Syndrome	203	61	0.01		1	1	0	2018	2018
FOXP3	50943	Gastroesophageal reflux disease	C0017168	disease	Digestive System Diseases	Disease or Syndrome	446	52	0.01		1	1	0	2010	2010
FOXP3	50943	Gaucher Disease	C0017205	disease	Congenital, Hereditary, and Neonatal Diseases and Abnormalities; Nutritional and Metabolic Diseases; Nervous System Diseases	Disease or Syndrome	143	82	0.01		1	1	0	2016	2016
FOXP3	50943	Gingivitis	C0017574	disease	Infections; Stomatognathic Diseases	Disease or Syndrome	152	3	0.01		1	1	0	2005	2005
FOXP3	50943	Glaucoma	C0017601	disease	Eye Diseases	Disease or Syndrome	770	198	0.01		1	1	0	2019	2019
FOXP3	50943	IGA Glomerulonephritis	C0017661	disease	Female Urogenital Diseases and Pregnancy Complications; Male Urogenital Diseases; Immune System Diseases	Disease or Syndrome	456	130	0.01		1	1	0	2018	2018
FOXP3	50943	Gonorrhea	C0018081	disease	Female Urogenital Diseases and Pregnancy Complications; Infections; Male Urogenital Diseases	Disease or Syndrome	261	7	0.01		1	1	0	2018	2018
FOXP3	50943	Guillain-Barre Syndrome	C0018378	disease	Immune System Diseases; Nervous System Diseases	Disease or Syndrome	163	13	0.01		1	1	0	2007	2007
FOXP3	50943	Hay fever	C0018621	disease	Respiratory Tract Diseases; Immune System Diseases; Otorhinolaryngologic Diseases	Disease or Syndrome	114	42	0.01		1	1	0	2009	2009
FOXP3	50943	Hematological Disease	C0018939	group	Hemic and Lymphatic Diseases	Disease or Syndrome	255	16	0.01		1	1	0	2017	2017
FOXP3	50943	Lymphatic Metastasis	C0024232	disease	Pathological Conditions, Signs and Symptoms; Neoplasms	Neoplastic Process	463	10	0.01		1	1	0	2017	2017
FOXP3	50943	Adult Glioblastoma	C0278878	disease	Neoplasms	Neoplastic Process	2528	98	0.01		1	1	0	2012	2012
FOXP3	50943	Intraepithelial Squamous Cell Carcinoma	C0334245	disease	Pathological Conditions, Signs and Symptoms; Neoplasms; Female Urogenital Diseases and Pregnancy Complications	Neoplastic Process	12	0	0.01		1	1	0	2018	2018
FOXP3	50943	Adenocarcinoma of colon	C0338106	disease	Digestive System Diseases; Neoplasms	Neoplastic Process	406	10	0.01		1	1	0	2019	2019
FOXP3	50943	Neurocysticercosis	C0338437	disease	Infections; Nervous System Diseases	Disease or Syndrome	34	9	0.01		1	1	0	2016	2016
FOXP3	50943	Stable angina	C0340288	disease	Pathological Conditions, Signs and Symptoms; Cardiovascular Diseases	Disease or Syndrome	144	8	0.01		1	1	0	2011	2011
FOXP3	50943	Chronic duodenitis	C0341248	disease	Digestive System Diseases	Disease or Syndrome	1	0	0.01		1	1	0	2019	2019
FOXP3	50943	Borderline lepromatous leprosy	C0343458	disease	Infections	Disease or Syndrome	7	0	0.01		1	1	0	2014	2014
FOXP3	50943	Type 2 lepra reaction	C0343466	disease	Infections; Skin and Connective Tissue Diseases	Disease or Syndrome	23	1	0.01		0	1	0	2017	2017
FOXP3	50943	Erythema nodosum leprosum	C0343467	phenotype	Pathological Conditions, Signs and Symptoms; Infections; Skin and Connective Tissue Diseases; Immune System Diseases; Chemically-Induced Disorders; Cardiovascular Diseases	Disease or Syndrome	23	1	0.01		0	1	0	2017	2017
FOXP3	50943	Intrahepatic Cholangiocarcinoma	C0345905	disease	Neoplasms	Neoplastic Process	470	19	0.01		1	1	0	2014	2014
FOXP3	50943	Squamous cell carcinoma of tongue	C0349566	disease	Neoplasms; Stomatognathic Diseases	Neoplastic Process	462	2	0.01		1	1	0	2018	2018
FOXP3	50943	Ischemic cardiomyopathy	C0349782	disease	Cardiovascular Diseases	Disease or Syndrome	110	5	0.01		1	1	0	2019	2019
FOXP3	50943	Hyperplastic Polyp	C0333983	disease	Pathological Conditions, Signs and Symptoms	Neoplastic Process	204	22	0.01		1	1	0	2019	2019
FOXP3	50943	Squamous intraepithelial lesion	C0333873	phenotype	Pathological Conditions, Signs and Symptoms; Neoplasms; Female Urogenital Diseases and Pregnancy Complications	Neoplastic Process	73	8	0.01		1	1	2	2019	2019
FOXP3	50943	Stage III Cutaneous Melanoma AJCC v6	C0278882	disease		Neoplastic Process	24	2	0.01		1	1	0	2011	2011
FOXP3	50943	Childhood B Acute Lymphoblastic Leukemia	C0279584	disease	Neoplasms; Immune System Diseases; Hemic and Lymphatic Diseases	Neoplastic Process	99	4	0.01		1	1	0	2018	2018
FOXP3	50943	Adenocarcinoma Of Esophagus	C0279628	disease	Digestive System Diseases; Neoplasms	Neoplastic Process	468	81	0.01		1	1	0	2020	2020
FOXP3	50943	stage, bladder cancer	C0280218	phenotype	Neoplasms; Female Urogenital Diseases and Pregnancy Complications; Male Urogenital Diseases	Neoplastic Process	17	2	0.01		1	1	0	2016	2016
FOXP3	50943	Squamous cell carcinoma of lip	C0280302	disease	Neoplasms; Skin and Connective Tissue Diseases; Stomatognathic Diseases	Neoplastic Process	32	2	0.01		1	1	0	2019	2019
FOXP3	50943	Childhood Glioblastoma	C0280474	disease	Neoplasms	Neoplastic Process	2527	98	0.01		1	1	0	2012	2012
FOXP3	50943	Primary central nervous system lymphoma	C0280803	disease	Neoplasms; Immune System Diseases; Nervous System Diseases; Hemic and Lymphatic Diseases	Neoplastic Process	156	4	0.01		1	1	0	2017	2017
FOXP3	50943	Adenocarcinoma of pancreas	C0281361	disease	Digestive System Diseases; Neoplasms; Endocrine System Diseases	Neoplastic Process	518	138	0.01		1	1	0	2009	2009
FOXP3	50943	Respiratory papilloma	C0281373	disease	Neoplasms	Neoplastic Process	3	0	0.01		1	1	0	2012	2012
FOXP3	50943	Superficial ulcer	C0333307	disease	Pathological Conditions, Signs and Symptoms	Acquired Abnormality	242	10	0.01		1	1	0	2017	2017
FOXP3	50943	Tumor necrosis	C0333516	phenotype	Pathological Conditions, Signs and Symptoms	Neoplastic Process	350	1	0.01		1	1	0	2008	2008
FOXP3	50943	Primary immune deficiency disorder	C0398686	group	Immune System Diseases	Disease or Syndrome	93	23	0.01		1	1	0	2010	2010
FOXP3	50943	Hyper-IgM Immunodeficiency Syndrome, Type 1	C0398689	disease	Congenital, Hereditary, and Neonatal Diseases and Abnormalities; Immune System Diseases; Hemic and Lymphatic Diseases	Disease or Syndrome	33	22	0.01		1	1	0	2014	2014
FOXP3	50943	proliferative nephritis unspecified	C0403367	disease	Female Urogenital Diseases and Pregnancy Complications; Male Urogenital Diseases	Disease or Syndrome	14	0	0.01		1	1	0	2009	2009
FOXP3	50943	Sentinel node (disorder)	C0677944	disease		Disease or Syndrome	130	5	0.01		1	1	0	2013	2013
FOXP3	50943	Tuberculosis, extrapulmonary	C0679362	disease	Infections	Disease or Syndrome	58	21	0.01		1	1	0	2006	2006
FOXP3	50943	Hemophilia, NOS	C0684275	disease	Congenital, Hereditary, and Neonatal Diseases and Abnormalities; Hemic and Lymphatic Diseases	Disease or Syndrome	82	8	0.01		1	1	0	2009	2009
FOXP3	50943	airway disease	C0699949	disease	Pathological Conditions, Signs and Symptoms; Respiratory Tract Diseases	Disease or Syndrome	198	1	0.01		1	1	0	2017	2017
FOXP3	50943	Viral respiratory infection	C0729531	group	Infections; Respiratory Tract Diseases	Disease or Syndrome	33	0	0.01		1	1	0	2016	2016
FOXP3	50943	Premenopausal breast cancer	C0741682	disease		Neoplastic Process	51	18	0.01		1	1	0	2014	2014
FOXP3	50943	Intractable diarrhea	C0743178	disease	Pathological Conditions, Signs and Symptoms	Disease or Syndrome	13	3	0.01		1	1	0	2014	2014
FOXP3	50943	Hepatic granuloma	C0745754	disease	Digestive System Diseases	Disease or Syndrome	9	0	0.01		1	1	0	2012	2012
FOXP3	50943	Idiopathic Inflammatory Myopathies	C0751356	disease	Musculoskeletal Diseases; Nervous System Diseases	Disease or Syndrome	106	4	0.01		1	1	0	2010	2010
FOXP3	50943	Well Differentiated Oligodendroglioma	C0751396	disease	Neoplasms	Neoplastic Process	270	22	0.01		1	1	0	2020	2020
FOXP3	50943	Carotid Artery Plaque	C0751633	disease	Nervous System Diseases; Cardiovascular Diseases	Acquired Abnormality	41	3	0.01		1	1	0	2012	2012
FOXP3	50943	Epithelial ovarian cancer	C0677886	disease	Neoplasms; Female Urogenital Diseases and Pregnancy Complications; Endocrine System Diseases	Neoplastic Process	1224	129	0.01		1	1	0	2010	2010
FOXP3	50943	Aqueous Humor Disorders	C0595936	disease	Eye Diseases	Disease or Syndrome	85	1	0.01		1	1	0	2017	2017
FOXP3	50943	Idiopathic crescentic glomerulonephritis	C0403416	disease	Female Urogenital Diseases and Pregnancy Complications; Male Urogenital Diseases	Disease or Syndrome	80	0	0.01		1	1	0	2017	2017
FOXP3	50943	Chronic rejection of renal transplant	C0403592	disease	Female Urogenital Diseases and Pregnancy Complications; Male Urogenital Diseases	Disease or Syndrome	64	1	0.01		1	1	0	2005	2005
FOXP3	50943	Transplant glomerulopathy	C0403601	disease		Disease or Syndrome	19	0	0.01		1	1	0	2009	2009
FOXP3	50943	Post-inflammatory hyperpigmentation in lichen planus	C0406366	disease	Skin and Connective Tissue Diseases	Disease or Syndrome	2	0	0.01		1	1	0	2019	2019
FOXP3	50943	Osteoarthritis, Knee	C0409959	disease	Musculoskeletal Diseases	Disease or Syndrome	368	150	0.01		1	1	1	2018	2018
FOXP3	50943	Hyperactive behavior	C0424295	phenotype	Pathological Conditions, Signs and Symptoms; Nervous System Diseases	Mental or Behavioral Dysfunction	1263	112	0.01		1	1	0	2014	2014
FOXP3	50943	Atherosclerotic occlusive disease	C0543822	disease	Cardiovascular Diseases	Disease or Syndrome	13	0	0.01		1	1	0	2010	2010
FOXP3	50943	X-Linked Lymphoproliferative Disorder	C0549463	disease	Immune System Diseases; Hemic and Lymphatic Diseases	Neoplastic Process	49	10	0.01		1	1	0	2019	2019
FOXP3	50943	Thyroid carcinoma	C0549473	disease	Neoplasms; Endocrine System Diseases	Neoplastic Process	1175	145	0.01		1	1	0	2018	2018
FOXP3	50943	Oropharyngeal disorders	C0553694	group	Digestive System Diseases; Respiratory Tract Diseases; Stomatognathic Diseases; Otorhinolaryngologic Diseases	Disease or Syndrome	163	3	0.01		1	1	0	2013	2013
FOXP3	50943	Osteosarcoma of bone	C0585442	disease	Neoplasms	Neoplastic Process	2247	151	0.01		1	1	0	2010	2010
FOXP3	50943	Malignant Squamous Cell Neoplasm	C0751688	disease	Neoplasms	Neoplastic Process	193	12	0.01		1	1	0	2010	2010
FOXP3	50943	Myocardial Ischemia	C0151744	disease	Cardiovascular Diseases	Disease or Syndrome	756	103	0.01		1	1	0	2017	2017
FOXP3	50943	Thymic Carcinoma	C0205969	disease	Neoplasms; Hemic and Lymphatic Diseases	Neoplastic Process	82	8	0.01		1	1	0	2018	2018
FOXP3	50943	Lung Diseases, Interstitial	C0206062	group	Respiratory Tract Diseases	Disease or Syndrome	319	144	0.01		1	1	1	2018	2018
FOXP3	50943	Lymphomatoid Papulosis	C0206182	disease	Neoplasms; Immune System Diseases; Hemic and Lymphatic Diseases	Neoplastic Process	34	0	0.01		1	1	0	2019	2019
FOXP3	50943	Tuberculosis, Drug-Resistant	C0206525	disease	Infections	Disease or Syndrome	37	0	0.01		1	1	0	2015	2015
FOXP3	50943	Flavivirus Infections	C0206608	group	Infections	Disease or Syndrome	30	0	0.01		1	1	0	2017	2017
FOXP3	50943	Adenomatous Polyps	C0206677	disease	Neoplasms	Neoplastic Process	120	20	0.01		1	1	0	2011	2011
FOXP3	50943	Carcinoma, Signet Ring Cell	C0206696	disease	Neoplasms	Neoplastic Process	70	6	0.01		1	1	0	2012	2012
FOXP3	50943	Inverted Papilloma	C0206721	disease	Neoplasms	Neoplastic Process	51	1	0.01		1	1	0	2019	2019
FOXP3	50943	Adult Soft Tissue Sarcoma	C0220613	disease		Neoplastic Process	162	3	0.01		1	1	0	2017	2017
FOXP3	50943	Adult Liver Carcinoma	C0220630	disease	Digestive System Diseases; Neoplasms	Neoplastic Process	1377	72	0.01		1	1	0	2015	2015
FOXP3	50943	Uveal melanoma	C0220633	disease	Neoplasms; Eye Diseases	Neoplastic Process	376	22	0.01		1	1	0	2012	2012
FOXP3	50943	Pityriasis Lichenoides	C0162853	disease	Skin and Connective Tissue Diseases	Disease or Syndrome	2	0	0.01		1	1	0	2008	2008
FOXP3	50943	Lichenoid Eruptions	C0162848	group	Skin and Connective Tissue Diseases	Disease or Syndrome	18	0	0.01		1	1	0	2019	2019
FOXP3	50943	Cutaneous Melanoma	C0151779	disease	Neoplasms; Skin and Connective Tissue Diseases	Neoplastic Process	507	248	0.01		1	1	0	2011	2011
FOXP3	50943	Disorder of tendon	C0151936	group	Skin and Connective Tissue Diseases; Musculoskeletal Diseases	Disease or Syndrome	79	14	0.01		1	1	0	2018	2018
FOXP3	50943	Esophageal carcinoma	C0152018	disease	Digestive System Diseases; Neoplasms	Neoplastic Process	1287	272	0.01		1	1	0	2011	2011
FOXP3	50943	Lobomycosis	C0152066	disease	Infections; Skin and Connective Tissue Diseases	Disease or Syndrome	16	0	0.01		1	1	0	2015	2015
FOXP3	50943	Non-arthropod borne lymphocytic choriomeningitis	C0153014	disease	Infections; Nervous System Diseases	Disease or Syndrome	133	0	0.01		1	1	0	2013	2013
FOXP3	50943	Malignant neoplasm of mouth	C0153381	group	Neoplasms; Stomatognathic Diseases	Neoplastic Process	756	184	0.01		1	1	0	2017	2017
FOXP3	50943	Malignant neoplasm of brain	C0153633	disease	Neoplasms; Nervous System Diseases	Neoplastic Process	294	16	0.01		1	1	1	2019	2019
FOXP3	50943	Secondary malignant neoplasm of skin	C0153687	disease	Neoplasms; Skin and Connective Tissue Diseases	Neoplastic Process	37	2	0.01		1	1	0	2018	2018
FOXP3	50943	Acute myocardial infarction	C0155626	disease	Pathological Conditions, Signs and Symptoms; Cardiovascular Diseases	Disease or Syndrome	766	118	0.01		1	1	0	2018	2018
FOXP3	50943	Uterine Polyp	C0156369	disease	Pathological Conditions, Signs and Symptoms; Neoplasms; Female Urogenital Diseases and Pregnancy Complications	Neoplastic Process	41	0	0.01		1	1	0	2018	2018
FOXP3	50943	Variegate Porphyria	C0162532	disease	Congenital, Hereditary, and Neonatal Diseases and Abnormalities; Digestive System Diseases; Nutritional and Metabolic Diseases; Skin and Connective Tissue Diseases	Disease or Syndrome	21	24	0.01		1	1	0	2018	2018
FOXP3	50943	Lip and Oral Cavity Carcinoma	C0220641	disease	Neoplasms; Stomatognathic Diseases	Neoplastic Process	734	172	0.01		1	1	0	2017	2017
FOXP3	50943	Childhood Soft Tissue Sarcoma	C0220645	disease		Neoplastic Process	166	3	0.01		1	1	0	2017	2017
FOXP3	50943	Metastatic malignant neoplasm to brain	C0220650	disease	Pathological Conditions, Signs and Symptoms; Neoplasms; Nervous System Diseases	Neoplastic Process	392	28	0.01		1	1	0	2017	2017
FOXP3	50943	Turcot syndrome (disorder)	C0265325	disease	Congenital, Hereditary, and Neonatal Diseases and Abnormalities; Digestive System Diseases; Neoplasms; Nervous System Diseases	Disease or Syndrome	77	75	0.01		1	1	0	2015	2015
FOXP3	50943	Actinic cheilitis	C0267026	disease	Stomatognathic Diseases	Disease or Syndrome	64	8	0.01		1	1	0	2017	2017
FOXP3	50943	Addison's disease due to autoimmunity	C0271737	disease	Immune System Diseases; Endocrine System Diseases	Disease or Syndrome	44	18	0.01		0	1	0	2006	2006
FOXP3	50943	Thrombocytopenia due to platelet alloimmunization	C0272286	disease	Hemic and Lymphatic Diseases	Disease or Syndrome	111	7	0.01		1	1	0	2014	2014
FOXP3	50943	Tuberculosis of intestines	C0275911	disease	Digestive System Diseases; Infections	Disease or Syndrome	24	2	0.01		1	1	0	2018	2018
FOXP3	50943	Stage III Colon Cancer	C0278480	disease	Digestive System Diseases; Neoplasms	Neoplastic Process	43	3	0.01		1	1	0	2017	2017
FOXP3	50943	Carcinoma breast stage IV	C0278488	disease		Neoplastic Process	573	14	0.01		1	1	0	2014	2014
FOXP3	50943	Malignant neoplasm of stomach stage IV	C0278498	disease		Neoplastic Process	78	7	0.01		1	1	0	2019	2019
FOXP3	50943	Metastatic Carcinoma to the Uterine Cervix	C0278584	disease	Neoplasms; Female Urogenital Diseases and Pregnancy Complications	Neoplastic Process	15	0	0.01		1	1	0	2018	2018
FOXP3	50943	Metastatic Renal Cell Cancer	C0278678	disease		Neoplastic Process	145	9	0.01		1	1	0	2012	2012
FOXP3	50943	Disseminated neuroblastoma	C0278694	disease	Neoplasms	Neoplastic Process	56	0	0.01		1	1	0	2015	2015
FOXP3	50943	Pemphigus and fogo selvagem	C0263314	disease	Skin and Connective Tissue Diseases; Immune System Diseases	Disease or Syndrome	26	3	0.01		1	1	0	2017	2017
FOXP3	50943	Pemphigus Foliaceus	C0263313	disease	Skin and Connective Tissue Diseases; Immune System Diseases	Disease or Syndrome	51	16	0.01		1	1	2	2017	2017
FOXP3	50943	Niemann-Pick Disease, Type C	C0220756	disease	Congenital, Hereditary, and Neonatal Diseases and Abnormalities; Nutritional and Metabolic Diseases; Nervous System Diseases; Hemic and Lymphatic Diseases	Disease or Syndrome	201	33	0.01		1	1	0	2017	2017
FOXP3	50943	Premature aging syndrome	C0231341	disease	Pathological Conditions, Signs and Symptoms	Disease or Syndrome	136	5	0.01		1	1	0	2016	2016
FOXP3	50943	Tenalgia	C0231529	phenotype	Pathological Conditions, Signs and Symptoms; Musculoskeletal Diseases; Nervous System Diseases	Sign or Symptom	2	0	0.01		1	1	0	2018	2018
FOXP3	50943	Granulomatous hepatitis	C0235369	disease	Digestive System Diseases	Disease or Syndrome	6	0	0.01		1	1	0	2013	2013
FOXP3	50943	Necrotizing fasciitis	C0238124	disease	Musculoskeletal Diseases	Disease or Syndrome	24	0	0.01		1	1	0	2018	2018
FOXP3	50943	Inclusion Body Myositis (disorder)	C0238190	disease	Musculoskeletal Diseases; Nervous System Diseases	Disease or Syndrome	87	1	0.01		1	1	0	2010	2010
FOXP3	50943	Hereditary pancreatitis	C0238339	disease	Digestive System Diseases	Disease or Syndrome	158	108	0.01		1	1	0	2019	2019
FOXP3	50943	Fibrosis, Liver	C0239946	disease	Pathological Conditions, Signs and Symptoms; Digestive System Diseases	Disease or Syndrome	1179	64	0.01		1	1	0	2007	2007
FOXP3	50943	Addison Disease	C0001403	disease	Immune System Diseases; Endocrine System Diseases	Disease or Syndrome	111	13	0.01		1	1	0	2005	2005
FOXP3	50943	Pelvic Inflammatory Disease	C0242172	group	Female Urogenital Diseases and Pregnancy Complications; Infections	Disease or Syndrome	74	3	0.01		1	1	0	2018	2018
FOXP3	50943	Autoimmune thrombocytopenia	C0242584	disease	Immune System Diseases; Hemic and Lymphatic Diseases	Disease or Syndrome	115	7	0.01		1	1	0	2014	2014
FOXP3	50943	Recurrent Endometrial Cancer	C0278802	disease	Neoplasms; Female Urogenital Diseases and Pregnancy Complications	Neoplastic Process	24	2	0.01		1	1	0	2012	2012

## Sheet: ITGAX
Gene	Gene_id	Disease	Disease_id	Type	Disease_Class	Semantic_Type	N_genes_d	N_SNPs_d	Score_gda	EL_gda	EI_gda	N_PMIDs	N_SNPs_gda	First_Ref	Last_Ref
ITGAX	3687	Acute Promyelocytic Leukemia	C0023487	disease	Neoplasms	Neoplastic Process	651	21	0.31		1	1	0	2007	2007
ITGAX	3687	Lupus Erythematosus, Systemic	C0024141	disease	Skin and Connective Tissue Diseases; Immune System Diseases	Disease or Syndrome	1883	1172	0.15		1	5	2	2008	2019
ITGAX	3687	Leukemia, Myelocytic, Acute	C0023467	disease	Neoplasms	Neoplastic Process	3111	6892	0.13		1	4	2	1998	2017
ITGAX	3687	Asthma	C0004096	disease	Respiratory Tract Diseases; Immune System Diseases	Disease or Syndrome	2096	1536	0.13		1	4	1	2012	2019
ITGAX	3687	IGA Glomerulonephritis	C0017661	disease	Female Urogenital Diseases and Pregnancy Complications; Male Urogenital Diseases; Immune System Diseases	Disease or Syndrome	456	130	0.11		1	3	3	2014	2019
ITGAX	3687	Diphtheria	C0012546	disease	Infections	Disease or Syndrome	147	0	0.1		1	12	0	2008	2019
ITGAX	3687	Forced expiratory volume function	C0016529	phenotype		Organ or Tissue Function	272	1169	0.1		1	1	1	2015	2015
ITGAX	3687	Neoplasms	C0027651	group	Neoplasms	Neoplastic Process	10161	1644	0.1		0.963	27	0	1994	2020
ITGAX	3687	Body mass index	C1305855	phenotype		Clinical Attribute	1014	2689	0.1		1	1	1	2019	2019
ITGAX	3687	Atherosclerosis	C0004153	disease	Cardiovascular Diseases	Disease or Syndrome	2044	281	0.08		1	8	0	2013	2019
ITGAX	3687	Hairy Cell Leukemia	C0023443	disease	Neoplasms; Immune System Diseases; Hemic and Lymphatic Diseases	Neoplastic Process	143	4	0.08		1	8	0	1988	2017
ITGAX	3687	Arteriosclerosis	C0003850	disease	Cardiovascular Diseases	Disease or Syndrome	2006	267	0.08		1	8	0	2013	2019
ITGAX	3687	Obesity	C0028754	disease	Pathological Conditions, Signs and Symptoms; Nutritional and Metabolic Diseases	Disease or Syndrome	2821	1111	0.06		1	6	0	2010	2019
ITGAX	3687	Encephalomyelitis	C0014070	disease	Infections; Nervous System Diseases	Disease or Syndrome	865	7	0.06		1	6	0	2017	2018
ITGAX	3687	Alzheimer's Disease	C0002395	disease	Nervous System Diseases; Mental Disorders	Disease or Syndrome	3397	1843	0.04		1	4	0	1997	2018
ITGAX	3687	Tuberculosis	C0041296	disease	Infections	Disease or Syndrome	1256	328	0.04		1	4	0	2006	2018
ITGAX	3687	Autoimmune Diseases	C0004364	group	Immune System Diseases	Disease or Syndrome	1758	428	0.04		1	4	0	2011	2019
ITGAX	3687	Polycystic Ovary Syndrome	C0032460	disease	Neoplasms; Female Urogenital Diseases and Pregnancy Complications; Endocrine System Diseases	Disease or Syndrome	988	363	0.03		1	3	0	2012	2013
ITGAX	3687	Chronic Lymphocytic Leukemia	C0023434	disease	Neoplasms; Immune System Diseases; Hemic and Lymphatic Diseases	Neoplastic Process	1447	291	0.03		1	3	0	1990	2017
ITGAX	3687	Pneumonitis	C3714636	disease	Infections; Respiratory Tract Diseases	Disease or Syndrome	697	13	0.03		1	3	0	2014	2019
ITGAX	3687	Inflammatory Bowel Diseases	C0021390	group	Digestive System Diseases	Disease or Syndrome	1577	605	0.03		0.667	3	0	2009	2017
ITGAX	3687	Behcet Syndrome	C0004943	disease	Congenital, Hereditary, and Neonatal Diseases and Abnormalities; Eye Diseases; Skin and Connective Tissue Diseases; Stomatognathic Diseases; Cardiovascular Diseases	Disease or Syndrome	502	243	0.03		1	3	1	2014	2017
ITGAX	3687	Irritable Bowel Syndrome	C0022104	disease	Digestive System Diseases	Disease or Syndrome	429	52	0.03		1	3	0	2017	2019
ITGAX	3687	Pneumonia	C0032285	disease	Infections; Respiratory Tract Diseases	Disease or Syndrome	1032	33	0.03		1	3	0	2014	2019
ITGAX	3687	Psoriasis	C0033860	disease	Skin and Connective Tissue Diseases	Disease or Syndrome	1308	705	0.03		1	3	0	2006	2014
ITGAX	3687	Crohn Disease	C0010346	disease	Digestive System Diseases	Disease or Syndrome	1382	1147	0.03		1	3	0	2009	2019
ITGAX	3687	Colitis	C0009319	disease	Digestive System Diseases	Disease or Syndrome	1135	15	0.03		1	3	0	2018	2019
ITGAX	3687	Prune Belly Syndrome	C0033770	disease	Congenital, Hereditary, and Neonatal Diseases and Abnormalities	Disease or Syndrome	83	2	0.02		1	2	0	2002	2010
ITGAX	3687	Diffuse Large B-Cell Lymphoma	C0079744	disease	Neoplasms; Immune System Diseases; Hemic and Lymphatic Diseases	Neoplastic Process	1043	127	0.02		1	2	0	2002	2017
ITGAX	3687	Inflammatory dermatosis	C3875321	disease	Skin and Connective Tissue Diseases	Disease or Syndrome	382	6	0.02		1	2	0	2014	2020
ITGAX	3687	Virus Diseases	C0042769	group	Infections	Disease or Syndrome	1471	42	0.02		1	2	0	2014	2017
ITGAX	3687	Malaria	C0024530	disease	Infections	Disease or Syndrome	685	148	0.02		1	2	0	2019	2020
ITGAX	3687	Multiple Sclerosis	C0026769	disease	Immune System Diseases; Nervous System Diseases	Disease or Syndrome	1800	1022	0.02		1	2	0	2006	2017
ITGAX	3687	Nasal Polyps	C0027430	disease	Pathological Conditions, Signs and Symptoms; Respiratory Tract Diseases; Otorhinolaryngologic Diseases	Disease or Syndrome	484	34	0.02		1	2	0	2010	2015
ITGAX	3687	Mucosa-Associated Lymphoid Tissue Lymphoma	C0242647	disease	Neoplasms; Immune System Diseases; Hemic and Lymphatic Diseases	Neoplastic Process	264	13	0.02		1	2	0	2001	2018
ITGAX	3687	Painful Bladder Syndrome	C1720830	disease	Female Urogenital Diseases and Pregnancy Complications; Male Urogenital Diseases	Disease or Syndrome	81	0	0.02		1	2	0	2002	2010
ITGAX	3687	airway disease	C0699949	disease	Pathological Conditions, Signs and Symptoms; Respiratory Tract Diseases	Disease or Syndrome	198	1	0.02		1	2	0	2017	2020
ITGAX	3687	Mixed cryoglobulinemia	C0543697	disease	Immune System Diseases; Hemic and Lymphatic Diseases; Cardiovascular Diseases	Disease or Syndrome	56	5	0.02		1	2	0	2011	2012
ITGAX	3687	Sepsis	C0243026	disease	Pathological Conditions, Signs and Symptoms; Infections	Disease or Syndrome	1453	144	0.02		1	2	0	2016	2018
ITGAX	3687	Pulmonary Emphysema	C0034067	disease	Respiratory Tract Diseases	Disease or Syndrome	352	64	0.02		1	2	0	2014	2015
ITGAX	3687	Impaired glucose tolerance	C0271650	phenotype	Nutritional and Metabolic Diseases	Disease or Syndrome	596	81	0.02		1	2	0	2010	2014
ITGAX	3687	Aortic Aneurysm, Abdominal	C0162871	disease	Cardiovascular Diseases	Disease or Syndrome	586	90	0.02		1	2	0	2016	2019
ITGAX	3687	Acute infectious disease	C0275518	group	Pathological Conditions, Signs and Symptoms; Infections	Disease or Syndrome	198	5	0.02		1	2	0	2018	2019
ITGAX	3687	Diabetes Mellitus, Non-Insulin-Dependent	C0011860	disease	Nutritional and Metabolic Diseases; Endocrine System Diseases	Disease or Syndrome	3134	2672	0.02		1	2	0	2018	2019
ITGAX	3687	Hepatitis C	C0019196	disease	Digestive System Diseases; Infections	Disease or Syndrome	1768	347	0.02		1	2	0	2011	2018
ITGAX	3687	Rheumatoid Arthritis	C0003873	disease	Skin and Connective Tissue Diseases; Musculoskeletal Diseases; Immune System Diseases	Disease or Syndrome	2723	2387	0.02		1	2	0	2010	2012
ITGAX	3687	Dermatitis	C0011603	disease	Skin and Connective Tissue Diseases	Disease or Syndrome	496	16	0.02		1	2	0	2014	2020
ITGAX	3687	Colon Carcinoma	C0699790	disease	Digestive System Diseases; Neoplasms	Neoplastic Process	2832	275	0.01		1	1	0	2015	2015
ITGAX	3687	Stomach Carcinoma	C0699791	disease	Digestive System Diseases; Neoplasms	Neoplastic Process	3720	652	0.01		1	1	0	2015	2015
ITGAX	3687	Malignant tumor of colon	C0007102	disease	Digestive System Diseases; Neoplasms	Neoplastic Process	2969	688	0.01		1	1	0	2015	2015
ITGAX	3687	Acne	C0702166	disease	Skin and Connective Tissue Diseases	Disease or Syndrome	167	11	0.01		1	1	0	2004	2004
ITGAX	3687	Middle Cerebral Artery Occlusion	C0740391	disease	Pathological Conditions, Signs and Symptoms; Nervous System Diseases; Cardiovascular Diseases	Acquired Abnormality	626	0	0.01		1	1	0	2017	2017
ITGAX	3687	Small Lymphocytic Lymphoma	C0855095	disease	Neoplasms; Immune System Diseases; Hemic and Lymphatic Diseases	Neoplastic Process	120	122	0.01		1	1	0	2002	2002
ITGAX	3687	Endothelial dysfunction	C0856169	phenotype		Disease or Syndrome	716	25	0.01		1	1	0	2017	2017
ITGAX	3687	Chronic graft-versus-host disease	C0867389	disease	Immune System Diseases	Disease or Syndrome	241	17	0.01		1	1	0	2017	2017
ITGAX	3687	Cardiomyopathies	C0878544	group	Cardiovascular Diseases	Disease or Syndrome	925	294	0.01		1	1	0	2007	2007
ITGAX	3687	West Nile viral infection	C1096184	disease	Infections; Nervous System Diseases	Disease or Syndrome	164	2	0.01		1	1	0	2019	2019
ITGAX	3687	Monoclonal Gammapathies	C1136085	group	Immune System Diseases; Hemic and Lymphatic Diseases	Neoplastic Process	62	2	0.01		1	1	0	2015	2015
ITGAX	3687	Carcinoma	C0007097	group	Neoplasms	Neoplastic Process	2462	103	0.01		1	1	0	2009	2009
ITGAX	3687	Secondary malignant neoplasm of lymph node	C0686619	disease	Pathological Conditions, Signs and Symptoms; Neoplasms	Neoplastic Process	2825	188	0.01		1	1	0	2018	2018
ITGAX	3687	Carcinoma of lung	C0684249	disease	Neoplasms; Respiratory Tract Diseases	Neoplastic Process	4081	1204	0.01		1	1	0	2013	2013
ITGAX	3687	Breast Carcinoma	C0678222	disease	Neoplasms; Skin and Connective Tissue Diseases	Neoplastic Process	6776	2793	0.01		1	1	0	2019	2019
ITGAX	3687	Endometrioma	C0269102	disease	Female Urogenital Diseases and Pregnancy Complications	Neoplastic Process	279	4	0.01		1	1	0	2019	2019
ITGAX	3687	Central Nervous System Infection	C0007684	group	Infections; Nervous System Diseases	Disease or Syndrome	44	5	0.01		1	1	0	2017	2017
ITGAX	3687	Squamous cell carcinoma	C0007137	disease	Neoplasms	Neoplastic Process	2507	257	0.01		1	1	0	2012	2012
ITGAX	3687	Rhinovirus infection	C0276447	disease	Infections	Disease or Syndrome	202	4	0.01		1	1	0	2019	2019
ITGAX	3687	Adult Diffuse Large Cell Lymphoma	C0278762	disease	Neoplasms; Immune System Diseases; Hemic and Lymphatic Diseases	Neoplastic Process	39	0	0.01		1	1	0	2002	2002
ITGAX	3687	Childhood Diffuse Large Cell Lymphoma	C0278840	disease	Neoplasms; Immune System Diseases; Hemic and Lymphatic Diseases	Neoplastic Process	39	0	0.01		1	1	0	2002	2002
ITGAX	3687	Invasive Lobular Breast Carcinoma	C0279565	disease	Neoplasms; Skin and Connective Tissue Diseases	Neoplastic Process	88	0	0.01		1	1	0	2006	2006
ITGAX	3687	Respiratory syncytial virus (RSV) infection in conditions classified elsewhere and of unspecified site	C0375023	disease		Disease or Syndrome	467	14	0.01		1	1	0	2018	2018
ITGAX	3687	Lupus Erythematosus	C0409974	disease	Pathological Conditions, Signs and Symptoms; Skin and Connective Tissue Diseases; Immune System Diseases	Disease or Syndrome	558	44	0.01		1	1	0	2015	2015
ITGAX	3687	Endometrial Carcinoma	C0476089	disease	Neoplasms; Female Urogenital Diseases and Pregnancy Complications	Neoplastic Process	1597	326	0.01		1	1	0	2017	2017
ITGAX	3687	Postpartum psychosis	C0520678	disease	Mental Disorders	Mental or Behavioral Dysfunction	19	0	0.01		1	1	0	2017	2017
ITGAX	3687	Metabolic Syndrome X	C0524620	disease	Nutritional and Metabolic Diseases	Disease or Syndrome	1125	591	0.01		1	1	0	2010	2010
ITGAX	3687	Malignant neoplasm of endometrium	C0007103	disease	Neoplasms; Female Urogenital Diseases and Pregnancy Complications	Neoplastic Process	1235	197	0.01		1	1	0	2017	2017
ITGAX	3687	Familial Cerebral Amyloid Angiopathy	C0268393	disease	Congenital, Hereditary, and Neonatal Diseases and Abnormalities; Nutritional and Metabolic Diseases; Nervous System Diseases; Cardiovascular Diseases	Disease or Syndrome	18	0	0.01		1	1	0	1997	1997
ITGAX	3687	Primary malignant neoplasm of lung	C1306460	disease	Neoplasms; Respiratory Tract Diseases	Neoplastic Process	3894	981	0.01		1	1	0	2013	2013
ITGAX	3687	Adult Lymphoma	C1332206	disease	Neoplasms; Immune System Diseases; Hemic and Lymphatic Diseases	Neoplastic Process	1169	66	0.01		1	1	0	2017	2017
ITGAX	3687	Steatohepatitis	C2711227	disease	Digestive System Diseases	Disease or Syndrome	1143	75	0.01		1	1	0	2017	2017
ITGAX	3687	Plaque, Amyloid	C2936349	disease	Pathological Conditions, Signs and Symptoms	Acquired Abnormality	123	10	0.01		1	1	0	2008	2008
ITGAX	3687	Acquired Hypogammaglobulinemia	C2936664	disease	Immune System Diseases	Disease or Syndrome	89	4	0.01		1	1	0	2012	2012
ITGAX	3687	Nonalcoholic Steatohepatitis	C3241937	disease	Digestive System Diseases	Disease or Syndrome	434	17	0.01		1	1	0	2017	2017
ITGAX	3687	Autoinflammatory disease	C3267073	disease		Disease or Syndrome	81	10	0.01		1	1	0	2017	2017
ITGAX	3687	Fulminant type 1 diabetes mellitus	C3495814	disease		Disease or Syndrome	9	0	0.01		1	1	0	2019	2019
ITGAX	3687	Acute deep venous thrombosis	C3536663	disease	Cardiovascular Diseases	Disease or Syndrome	11	0	0.01		1	1	0	2005	2005
ITGAX	3687	Triple Negative Breast Neoplasms	C3539878	disease	Neoplasms; Skin and Connective Tissue Diseases	Neoplastic Process	1674	99	0.01		1	1	0	2019	2019
ITGAX	3687	Arthritis	C0003864	disease	Musculoskeletal Diseases	Disease or Syndrome	1072	69	0.01		1	1	0	2017	2017
ITGAX	3687	Immunosuppression	C4048329	disease		Disease or Syndrome	632	9	0.01		1	1	0	2014	2014
ITGAX	3687	Gastrointestinal infection	C4082764	disease	Pathological Conditions, Signs and Symptoms; Digestive System Diseases; Infections	Disease or Syndrome	17	0	0.01		1	1	0	2012	2012
ITGAX	3687	Obesity-Associated Insulin Resistance	C4331921	disease		Disease or Syndrome	36	0	0.01		1	1	0	2008	2008
ITGAX	3687	Fatty Liver Disease	C4529962	disease		Disease or Syndrome	741	81	0.01		1	1	0	2017	2017
ITGAX	3687	Mullerian Aplasia and Hyperandrogenism	C2675014	disease	Congenital, Hereditary, and Neonatal Diseases and Abnormalities; Female Urogenital Diseases and Pregnancy Complications; Male Urogenital Diseases; Endocrine System Diseases	Disease or Syndrome	5	3	0.01		1	1	0	2019	2019
ITGAX	3687	Reproductive tract infection	C2314882	disease	Female Urogenital Diseases and Pregnancy Complications; Infections; Male Urogenital Diseases	Disease or Syndrome	19	3	0.01		1	1	0	2016	2016
ITGAX	3687	Influenza A	C2062441	disease		Disease or Syndrome	563	19	0.01		1	1	0	2019	2019
ITGAX	3687	Childhood Lymphoma	C1332979	disease	Neoplasms; Immune System Diseases; Hemic and Lymphatic Diseases	Neoplastic Process	1171	66	0.01		1	1	0	2017	2017
ITGAX	3687	High Grade Cervical Intraepithelial Neoplasia	C1334011	disease	Neoplasms	Neoplastic Process	51	1	0.01		1	1	0	2013	2013
ITGAX	3687	Burkitt-like lymphoma	C1368771	disease	Neoplasms; Infections; Immune System Diseases; Hemic and Lymphatic Diseases	Neoplastic Process	11	0	0.01		1	1	0	2002	2002
ITGAX	3687	Benign melanocytic nevus	C1456781	disease	Neoplasms	Neoplastic Process	122	20	0.01		1	1	0	2019	2019
ITGAX	3687	Cerebral Amyloid Angiopathy, Hereditary	C1510489	disease	Congenital, Hereditary, and Neonatal Diseases and Abnormalities; Nutritional and Metabolic Diseases; Nervous System Diseases; Cardiovascular Diseases	Disease or Syndrome	19	4	0.01		1	1	0	1997	1997
ITGAX	3687	cancer angiogenesis	C1536999	phenotype		Neoplastic Process	44	0	0.01		1	1	0	2019	2019
ITGAX	3687	Latent Tuberculosis	C1609538	disease	Infections	Disease or Syndrome	183	18	0.01		1	1	0	2018	2018
ITGAX	3687	Malignant neoplasm of breast	C0006142	disease	Neoplasms; Skin and Connective Tissue Diseases	Neoplastic Process	6941	3417	0.01		1	1	0	2019	2019
ITGAX	3687	ANOPHTHALMIA AND PULMONARY HYPOPLASIA	C1832661	disease	Congenital, Hereditary, and Neonatal Diseases and Abnormalities; Eye Diseases; Respiratory Tract Diseases	Disease or Syndrome	1410	80	0.01		1	1	0	2018	2018
ITGAX	3687	Cleft palate, isolated	C1837218	disease	Congenital, Hereditary, and Neonatal Diseases and Abnormalities; Musculoskeletal Diseases; Stomatognathic Diseases	Congenital Abnormality	295	70	0.01		1	1	0	2018	2018
ITGAX	3687	AURAL ATRESIA, CONGENITAL	C1842937	disease	Congenital, Hereditary, and Neonatal Diseases and Abnormalities	Disease or Syndrome	110	29	0.01		1	1	0	1997	1997
ITGAX	3687	B-CELL MALIGNANCY, LOW-GRADE	C1868683	disease		Neoplastic Process	350	19	0.01		1	1	0	2004	2004
ITGAX	3687	Leukemia, B-Cell	C2004493	disease	Neoplasms; Immune System Diseases; Hemic and Lymphatic Diseases	Neoplastic Process	239	2	0.01		1	1	0	1990	1990
ITGAX	3687	Triple-Negative Breast Carcinoma	C4722518	disease	Neoplasms; Skin and Connective Tissue Diseases	Neoplastic Process	1598	96	0.01		1	1	0	2019	2019
ITGAX	3687	Dengue Fever	C0011311	disease	Infections	Disease or Syndrome	360	39	0.01		1	1	0	2014	2014
ITGAX	3687	melanoma	C0025202	disease	Neoplasms	Neoplastic Process	3087	515	0.01		1	1	0	2007	2007
ITGAX	3687	Monoclonal Gammopathy of Undetermined Significance	C0026470	disease	Immune System Diseases; Hemic and Lymphatic Diseases	Neoplastic Process	227	20	0.01		1	1	0	2015	2015
ITGAX	3687	Multiple Myeloma	C0026764	disease	Neoplasms; Immune System Diseases; Hemic and Lymphatic Diseases; Cardiovascular Diseases	Neoplastic Process	1740	865	0.01		1	1	0	1995	1995
ITGAX	3687	Helminthiasis	C0018889	disease	Infections	Disease or Syndrome	59	1	0.01		1	1	0	2010	2010
ITGAX	3687	Myasthenia Gravis	C0026896	disease	Neoplasms; Immune System Diseases; Nervous System Diseases	Disease or Syndrome	336	93	0.01		1	1	0	2003	2003
ITGAX	3687	Mycoplasma Infections	C0026936	group	Infections	Disease or Syndrome	188	1	0.01		1	1	0	2013	2013
ITGAX	3687	Myocarditis	C0027059	disease	Cardiovascular Diseases	Disease or Syndrome	285	2	0.01		1	1	0	2017	2017
ITGAX	3687	Graft-vs-Host Disease	C0018133	disease	Immune System Diseases	Disease or Syndrome	447	25	0.01		1	1	0	2003	2003
ITGAX	3687	Nematode infections	C0027583	group	Infections	Disease or Syndrome	33	0	0.01		1	1	0	2011	2011
ITGAX	3687	Neoplasm Metastasis	C0027627	phenotype	Pathological Conditions, Signs and Symptoms; Neoplasms	Neoplastic Process	6385	327	0.01		1	1	0	2017	2017
ITGAX	3687	Glioma	C0017638	disease	Neoplasms	Neoplastic Process	3097	353	0.01		1	1	0	2004	2004
ITGAX	3687	Nephroblastoma	C0027708	disease	Congenital, Hereditary, and Neonatal Diseases and Abnormalities; Neoplasms; Female Urogenital Diseases and Pregnancy Complications; Male Urogenital Diseases	Neoplastic Process	586	125	0.01		1	1	0	1998	1998
ITGAX	3687	Melanocytic nevus	C0027962	disease	Neoplasms	Neoplastic Process	297	33	0.01		1	1	0	2019	2019
ITGAX	3687	Malignant neoplasm of stomach	C0024623	disease	Digestive System Diseases; Neoplasms	Neoplastic Process	3806	615	0.01		1	1	0	2015	2015
ITGAX	3687	Hepatitis B	C0019163	disease	Digestive System Diseases; Infections	Disease or Syndrome	1449	519	0.01		1	1	0	2018	2018
ITGAX	3687	Lymphoma, Follicular	C0024301	disease	Neoplasms; Immune System Diseases; Hemic and Lymphatic Diseases	Neoplastic Process	477	83	0.01		1	1	0	2016	2016
ITGAX	3687	Keratoconjunctivitis Sicca	C0022575	disease	Eye Diseases	Disease or Syndrome	90	3	0.01		1	1	0	2018	2018
ITGAX	3687	Hypertensive disease	C0020538	group	Cardiovascular Diseases	Disease or Syndrome	2322	1085	0.01		1	1	0	2020	2020
ITGAX	3687	Hypercholesterolemia	C0020443	disease	Nutritional and Metabolic Diseases	Disease or Syndrome	489	123	0.01		1	1	0	2016	2016
ITGAX	3687	Childhood Acute Lymphoblastic Leukemia	C0023452	disease	Neoplasms; Immune System Diseases; Hemic and Lymphatic Diseases	Neoplastic Process	1096	261	0.01		1	1	0	2013	2013
ITGAX	3687	Hyperalgesia	C0020429	phenotype	Pathological Conditions, Signs and Symptoms; Nervous System Diseases	Sign or Symptom	451	4	0.01		1	1	0	2017	2017
ITGAX	3687	Prolymphocytic Leukemia	C0023486	disease	Neoplasms; Immune System Diseases; Hemic and Lymphatic Diseases	Neoplastic Process	37	2	0.01		1	1	0	1990	1990
ITGAX	3687	HIV Infections	C0019693	group	Infections; Immune System Diseases	Disease or Syndrome	807	142	0.01		1	1	0	2018	2018
ITGAX	3687	Adult T-Cell Lymphoma/Leukemia	C0023493	disease	Neoplasms; Immune System Diseases; Hemic and Lymphatic Diseases	Neoplastic Process	540	11	0.01		1	1	0	2010	2010
ITGAX	3687	Leukopenia	C0023530	disease	Hemic and Lymphatic Diseases	Disease or Syndrome	440	153	0.01		1	1	0	2008	2008
ITGAX	3687	Lupus Vulgaris	C0024131	disease	Infections; Skin and Connective Tissue Diseases	Disease or Syndrome	526	44	0.01		1	1	0	2015	2015
ITGAX	3687	Lupus Erythematosus, Discoid	C0024138	disease	Skin and Connective Tissue Diseases	Disease or Syndrome	552	46	0.01		1	1	0	2015	2015
ITGAX	3687	Lymphocytosis	C0024282	disease	Hemic and Lymphatic Diseases	Disease or Syndrome	78	1	0.01		1	1	0	2017	2017
ITGAX	3687	Lymphoma	C0024299	group	Neoplasms; Immune System Diseases; Hemic and Lymphatic Diseases	Neoplastic Process	1548	91	0.01		1	1	0	2017	2017
ITGAX	3687	Gastritis	C0017152	disease	Digestive System Diseases	Disease or Syndrome	292	21	0.01		1	1	0	2005	2005
ITGAX	3687	Obesity, Morbid	C0028756	disease	Pathological Conditions, Signs and Symptoms; Nutritional and Metabolic Diseases	Disease or Syndrome	203	49	0.01		1	1	0	2020	2020
ITGAX	3687	Cerebral Amyloid Angiopathy	C0085220	disease	Nutritional and Metabolic Diseases; Nervous System Diseases; Cardiovascular Diseases	Disease or Syndrome	65	22	0.01		1	1	0	1997	1997
ITGAX	3687	Monocytosis	C0085702	disease	Pathological Conditions, Signs and Symptoms; Hemic and Lymphatic Diseases	Disease or Syndrome	61	3	0.01		1	1	0	2017	2017
ITGAX	3687	Active tuberculosis	C0151332	disease	Infections	Disease or Syndrome	116	25	0.01		1	1	0	2017	2017
ITGAX	3687	Myocardial Ischemia	C0151744	disease	Cardiovascular Diseases	Disease or Syndrome	756	103	0.01		1	1	0	2019	2019
ITGAX	3687	Acute myocardial infarction	C0155626	disease	Pathological Conditions, Signs and Symptoms; Cardiovascular Diseases	Disease or Syndrome	766	118	0.01		1	1	0	2017	2017
ITGAX	3687	Ulcerative Colitis	C0009324	disease	Digestive System Diseases	Disease or Syndrome	1458	827	0.01		1	1	0	2009	2009
ITGAX	3687	Tumor Progression	C0178874	phenotype	Pathological Conditions, Signs and Symptoms	Neoplastic Process	3865	72	0.01		1	1	0	2010	2010
ITGAX	3687	Lichen Planus, Oral	C0206139	disease	Skin and Connective Tissue Diseases; Stomatognathic Diseases	Disease or Syndrome	257	20	0.01		1	1	0	2017	2017
ITGAX	3687	Fibrosis, Liver	C0239946	disease	Pathological Conditions, Signs and Symptoms; Digestive System Diseases	Disease or Syndrome	1179	64	0.01		1	1	0	2017	2017
ITGAX	3687	Malignant neoplasm of lung	C0242379	disease	Neoplasms; Respiratory Tract Diseases	Neoplastic Process	4173	1142	0.01		1	1	0	2013	2013
ITGAX	3687	Neoplasm, Residual	C0242596	phenotype	Pathological Conditions, Signs and Symptoms; Neoplasms	Neoplastic Process	329	23	0.01		1	1	0	2016	2016
ITGAX	3687	Cerebral Palsy	C0007789	disease	Nervous System Diseases	Disease or Syndrome	241	69	0.01		1	1	0	2018	2018
ITGAX	3687	Septicemia	C0036690	disease	Pathological Conditions, Signs and Symptoms; Infections	Disease or Syndrome	1285	141	0.01		1	1	0	2018	2018
ITGAX	3687	Gestational Diabetes	C0085207	phenotype	Nutritional and Metabolic Diseases; Female Urogenital Diseases and Pregnancy Complications; Endocrine System Diseases	Disease or Syndrome	649	224	0.01		1	1	0	2016	2016
ITGAX	3687	Bacterial Vaginosis	C0085166	disease	Female Urogenital Diseases and Pregnancy Complications; Infections	Disease or Syndrome	73	15	0.01		1	1	0	2016	2016
ITGAX	3687	Colorectal Carcinoma	C0009402	disease	Digestive System Diseases; Neoplasms	Neoplastic Process	5473	1962	0.01		1	1	0	2019	2019
ITGAX	3687	Japanese Encephalitis	C0014057	disease	Infections; Nervous System Diseases	Disease or Syndrome	119	6	0.01		1	1	0	2017	2017
ITGAX	3687	Diabetes Mellitus, Insulin-Dependent	C0011854	disease	Nutritional and Metabolic Diseases; Immune System Diseases; Endocrine System Diseases	Disease or Syndrome	1675	954	0.01		1	1	0	2012	2012
ITGAX	3687	Diabetes Mellitus	C0011849	group	Nutritional and Metabolic Diseases; Endocrine System Diseases	Disease or Syndrome	2803	824	0.01		1	1	0	2007	2007
ITGAX	3687	Pulmonary Alveolar Proteinosis	C0034050	disease	Respiratory Tract Diseases	Disease or Syndrome	51	7	0.01		1	1	0	2018	2018
ITGAX	3687	Diabetes	C0011847	disease	Endocrine System Diseases	Disease or Syndrome	2359	710	0.01		1	1	0	2007	2007
ITGAX	3687	Pulmonary Fibrosis	C0034069	disease	Respiratory Tract Diseases	Disease or Syndrome	924	25	0.01		1	1	0	2017	2017
ITGAX	3687	Respiratory Syncytial Virus Infections	C0035235	group	Infections	Disease or Syndrome	244	5	0.01		1	1	0	2012	2012
ITGAX	3687	Sarcoidosis	C0036202	disease	Hemic and Lymphatic Diseases	Disease or Syndrome	413	787	0.01		1	1	0	2012	2012
ITGAX	3687	Skin lesion	C0037284	group	Skin and Connective Tissue Diseases	Disease or Syndrome	563	52	0.01		1	1	0	2018	2018
ITGAX	3687	Gastric ulcer	C0038358	disease	Digestive System Diseases	Disease or Syndrome	136	7	0.01		1	1	0	2005	2005
ITGAX	3687	Cytomegalovirus Infections	C0010823	group	Infections	Disease or Syndrome	462	26	0.01		1	1	0	2017	2017
ITGAX	3687	Tuberculosis, Pulmonary	C0041327	disease	Infections; Respiratory Tract Diseases	Disease or Syndrome	358	171	0.01		0	1	1	2009	2009
ITGAX	3687	Common Variable Immunodeficiency	C0009447	disease	Immune System Diseases	Disease or Syndrome	207	85	0.01		1	1	0	2012	2012
ITGAX	3687	Psoriasis vulgaris	C0263361	disease	Skin and Connective Tissue Diseases	Disease or Syndrome	255	80	0.01		1	1	0	2010	2010

## Sheet: CXCL10
Gene	Gene_id	Disease	Disease_id	Type	Disease_Class	Semantic_Type	N_genes_d	N_SNPs_d	Score_gda	EL_gda	EI_gda	N_PMIDs	N_SNPs_gda	First_Ref	Last_Ref
CXCL10	3627	Brain Ischemia	C0007786	disease	Nervous System Diseases; Cardiovascular Diseases	Disease or Syndrome	358	5	0.51		1	3	0	2005	2018
CXCL10	3627	Influenza	C0021400	disease	Infections; Respiratory Tract Diseases	Disease or Syndrome	858	17	0.38		1	9	0	2011	2018
CXCL10	3627	Dermatitis, Atopic	C0011615	disease	Congenital, Hereditary, and Neonatal Diseases and Abnormalities; Skin and Connective Tissue Diseases; Immune System Diseases	Disease or Syndrome	751	232	0.35		1	6	0	2001	2020
CXCL10	3627	Celiac Disease	C0007570	disease	Digestive System Diseases; Nutritional and Metabolic Diseases	Disease or Syndrome	527	263	0.34		1	4	0	2018	2019
CXCL10	3627	Primary biliary cirrhosis	C0008312	disease	Pathological Conditions, Signs and Symptoms; Digestive System Diseases	Disease or Syndrome	478	667	0.33		1	4	0	2001	2013
CXCL10	3627	Major Depressive Disorder	C1269683	disease	Mental Disorders	Mental or Behavioral Dysfunction	1236	1451	0.32		1	2	0	2008	2019
CXCL10	3627	Interstitial Cystitis	C0282488	disease	Female Urogenital Diseases and Pregnancy Complications; Male Urogenital Diseases	Disease or Syndrome	122	3	0.32		1	3	0	2008	2018
CXCL10	3627	Thyroid carcinoma	C0549473	disease	Neoplasms; Endocrine System Diseases	Neoplastic Process	1175	145	0.31		1	2	0	2015	2019
CXCL10	3627	Myocardial Ischemia	C0151744	disease	Cardiovascular Diseases	Disease or Syndrome	756	103	0.31		0.5	2	0	2005	2016
CXCL10	3627	Colonic Neoplasms	C0009375	group	Digestive System Diseases; Neoplasms	Neoplastic Process	947	45	0.31		1	2	0	2004	2019
CXCL10	3627	Drug-Induced Liver Disease	C0860207	phenotype	Digestive System Diseases; Chemically-Induced Disorders	Disease or Syndrome	537	29	0.31		1	2	0	2001	2018
CXCL10	3627	Biliary cirrhosis	C0023892	disease	Pathological Conditions, Signs and Symptoms; Digestive System Diseases	Disease or Syndrome	132	36	0.31		1	2	0	2005	2008
CXCL10	3627	Chronic interstitial cystitis	C0600040	disease	Female Urogenital Diseases and Pregnancy Complications; Male Urogenital Diseases	Disease or Syndrome	64	2	0.31		1	2	0	2008	2018
CXCL10	3627	Thyroid Neoplasm	C0040136	disease	Neoplasms; Endocrine System Diseases	Neoplastic Process	1164	135	0.31		1	2	0	2015	2019
CXCL10	3627	Drug-Induced Acute Liver Injury	C3658290	disease	Digestive System Diseases; Chemically-Induced Disorders	Disease or Syndrome	413	0	0.3		1	1	0	2001	2001
CXCL10	3627	Secondary Biliary Cholangitis	C0238065	disease	Pathological Conditions, Signs and Symptoms; Digestive System Diseases	Disease or Syndrome	42	0	0.3		1	1	0	2008	2008
CXCL10	3627	Liver Cirrhosis, Experimental	C0023893	disease	Pathological Conditions, Signs and Symptoms; Digestive System Diseases	Experimental Model of Disease	870	0	0.3		1	1	0	2014	2014
CXCL10	3627	Painful Bladder Syndrome	C1720830	disease	Female Urogenital Diseases and Pregnancy Complications; Male Urogenital Diseases	Disease or Syndrome	81	0	0.3		1	1	0	2008	2008
CXCL10	3627	Thyroid Gland Follicular Adenoma	C0151468	disease	Neoplasms; Endocrine System Diseases	Neoplastic Process	202	14	0.3		1	1	0	2015	2015
CXCL10	3627	Malignant tumor of colon	C0007102	disease	Digestive System Diseases; Neoplasms	Neoplastic Process	2969	688	0.3		1	1	0	2004	2004
CXCL10	3627	Unipolar Depression	C0041696	disease	Mental Disorders	Mental or Behavioral Dysfunction	641	225	0.3		1	1	0	2008	2008
CXCL10	3627	Eczema, Infantile	C0086196	disease	Congenital, Hereditary, and Neonatal Diseases and Abnormalities; Skin and Connective Tissue Diseases; Immune System Diseases	Disease or Syndrome	36	0	0.3		1	1	0	2008	2008
CXCL10	3627	Abortion, Tubal	C0000822	phenotype	Female Urogenital Diseases and Pregnancy Complications	Pathologic Function	109	0	0.3		1	1	0	2008	2008
CXCL10	3627	Hepatitis, Drug-Induced	C1262760	disease	Digestive System Diseases; Chemically-Induced Disorders	Disease or Syndrome	418	0	0.3		1	1	0	2001	2001
CXCL10	3627	Alopecia Areata	C0002171	disease	Skin and Connective Tissue Diseases	Disease or Syndrome	114	54	0.3		1	1	0	2012	2012
CXCL10	3627	Cerebral Ischemia	C0917798	disease	Nervous System Diseases; Cardiovascular Diseases	Pathologic Function	120	2	0.3		1	1	0	2005	2005
CXCL10	3627	Miscarriage	C4552766	disease	Female Urogenital Diseases and Pregnancy Complications	Disease or Syndrome	426	56	0.3		1	1	0	2008	2008
CXCL10	3627	Chemically-Induced Liver Toxicity	C4279912	disease	Digestive System Diseases; Chemically-Induced Disorders	Disease or Syndrome	412	0	0.3		1	1	0	2001	2001
CXCL10	3627	Chemical and Drug Induced Liver Injury	C4277682	disease	Digestive System Diseases; Chemically-Induced Disorders	Disease or Syndrome	461	38	0.3		1	1	0	2001	2001
CXCL10	3627	Diabetes Mellitus, Insulin-Dependent	C0011854	disease	Nutritional and Metabolic Diseases; Immune System Diseases; Endocrine System Diseases	Disease or Syndrome	1675	954	0.3		0.818	11	3	2003	2019
CXCL10	3627	Hepatitis, Toxic	C0019193	disease	Digestive System Diseases; Chemically-Induced Disorders	Injury or Poisoning	412	0	0.3		1	1	0	2001	2001
CXCL10	3627	Early Pregnancy Loss	C3830362	phenotype	Female Urogenital Diseases and Pregnancy Complications	Finding	109	0	0.3		1	1	0	2008	2008
CXCL10	3627	Spontaneous abortion	C0000786	phenotype	Female Urogenital Diseases and Pregnancy Complications	Pathologic Function	188	0	0.3		1	1	0	2008	2008
CXCL10	3627	Biliary Cirrhosis, Primary, 1	C4551595	disease	Pathological Conditions, Signs and Symptoms; Digestive System Diseases	Disease or Syndrome	42	0	0.3		1	1	0	2008	2008
CXCL10	3627	Encephalitis	C0014038	disease	Nervous System Diseases	Disease or Syndrome	324	18	0.27		1	8	0	2007	2019
CXCL10	3627	Respiratory Distress Syndrome, Adult	C0035222	disease	Respiratory Tract Diseases	Disease or Syndrome	434	60	0.22		1	3	0	1997	2019
CXCL10	3627	Myocarditis	C0027059	disease	Cardiovascular Diseases	Disease or Syndrome	285	2	0.21		1	2	0	2004	2012
CXCL10	3627	Uveitis	C0042164	disease	Eye Diseases	Disease or Syndrome	247	43	0.21		1	2	0	2006	2018
CXCL10	3627	Hypothermia, natural	C0020672	phenotype	Pathological Conditions, Signs and Symptoms	Finding	52	3	0.2		1	1	0	2006	2006
CXCL10	3627	Hypertension, Renovascular	C0020545	disease	Female Urogenital Diseases and Pregnancy Complications; Male Urogenital Diseases; Cardiovascular Diseases	Disease or Syndrome	78	8	0.2		1	1	0	2007	2007
CXCL10	3627	Bronchiolitis, Viral	C0006274	disease	Infections; Respiratory Tract Diseases	Disease or Syndrome	16	0	0.2		1	1	0	2003	2003
CXCL10	3627	Reperfusion Injury	C0035126	disease	Pathological Conditions, Signs and Symptoms; Cardiovascular Diseases	Injury or Poisoning	300	0	0.2		1	1	0	2008	2008
CXCL10	3627	Proteinuria	C0033687	phenotype	Pathological Conditions, Signs and Symptoms; Female Urogenital Diseases and Pregnancy Complications; Male Urogenital Diseases	Finding	239	20	0.2		1	1	0	2006	2006
CXCL10	3627	Hepatitis C, Chronic	C0524910	disease	Digestive System Diseases; Infections	Disease or Syndrome	430	80	0.1		1	17	2	2001	2019
CXCL10	3627	Autoimmune Diseases	C0004364	group	Immune System Diseases	Disease or Syndrome	1758	428	0.1		0.9	10	0	2008	2018
CXCL10	3627	Latent Tuberculosis	C1609538	disease	Infections	Disease or Syndrome	183	18	0.1		0.909	11	0	2015	2019
CXCL10	3627	Asthma	C0004096	disease	Respiratory Tract Diseases; Immune System Diseases	Disease or Syndrome	2096	1536	0.1		1	17	0	2005	2019
CXCL10	3627	Rheumatoid Arthritis	C0003873	disease	Skin and Connective Tissue Diseases; Musculoskeletal Diseases; Immune System Diseases	Disease or Syndrome	2723	2387	0.1		0.9	20	1	2001	2019
CXCL10	3627	Primary malignant neoplasm	C1306459	group	Neoplasms	Neoplastic Process	8221	1374	0.1		1	12	0	2002	2019
CXCL10	3627	Tumor Cell Invasion	C1269955	phenotype		Neoplastic Process	6626	169	0.1		1	14	0	2005	2018
CXCL10	3627	Hepatitis B, Chronic	C0524909	disease	Digestive System Diseases; Infections	Disease or Syndrome	415	84	0.1		1	10	0	2001	2019
CXCL10	3627	Human immunodeficiency virus (HIV) II infection category B1	C3854222	disease		Disease or Syndrome	985	56	0.1		1	10	1	2012	2019
CXCL10	3627	HIV Infections	C0019693	group	Infections; Immune System Diseases	Disease or Syndrome	807	142	0.1		1	15	1	2005	2019
CXCL10	3627	Hepatitis C	C0019196	disease	Digestive System Diseases; Infections	Disease or Syndrome	1768	347	0.1		0.967	61	2	2001	2019
CXCL10	3627	Hepatitis B	C0019163	disease	Digestive System Diseases; Infections	Disease or Syndrome	1449	519	0.1		1	16	0	2001	2019
CXCL10	3627	Protein measurement	C0202202	group		Laboratory Procedure	75	422	0.1		1	1	1	2018	2018
CXCL10	3627	Virus Diseases	C0042769	group	Infections	Disease or Syndrome	1471	42	0.1		1	15	0	2003	2019
CXCL10	3627	Chronic Obstructive Airway Disease	C0024117	disease	Respiratory Tract Diseases	Disease or Syndrome	1428	852	0.1		1	11	1	2002	2019
CXCL10	3627	Tuberculosis	C0041296	disease	Infections	Disease or Syndrome	1256	328	0.1		0.971	35	1	2004	2020
CXCL10	3627	Neoplasm Metastasis	C0027627	phenotype	Pathological Conditions, Signs and Symptoms; Neoplasms	Neoplastic Process	6385	327	0.1		0.857	14	0	2004	2019
CXCL10	3627	melanoma	C0025202	disease	Neoplasms	Neoplastic Process	3087	515	0.1		1	12	0	1991	2019
CXCL10	3627	Neoplasms	C0027651	group	Neoplasms	Neoplastic Process	10161	1644	0.1		0.986	71	0	1997	2020
CXCL10	3627	Malignant neoplasm of breast	C0006142	disease	Neoplasms; Skin and Connective Tissue Diseases	Neoplastic Process	6941	3417	0.1		1	10	1	2004	2019
CXCL10	3627	Blood Protein Measurement	C2985280	phenotype		Laboratory Procedure	1156	2575	0.1		1	1	1	2018	2018
CXCL10	3627	Multiple Sclerosis	C0026769	disease	Immune System Diseases; Nervous System Diseases	Disease or Syndrome	1800	1022	0.1		0.909	11	0	2000	2019
CXCL10	3627	Lupus Erythematosus, Systemic	C0024141	disease	Skin and Connective Tissue Diseases; Immune System Diseases	Disease or Syndrome	1883	1172	0.1		1	13	0	2014	2019
CXCL10	3627	Tuberculosis, Pulmonary	C0041327	disease	Infections; Respiratory Tract Diseases	Disease or Syndrome	358	171	0.1		1	12	1	2012	2019
CXCL10	3627	Malignant Neoplasms	C0006826	group	Neoplasms	Neoplastic Process	8621	1641	0.1		1	14	0	2002	2019
CXCL10	3627	Liver carcinoma	C2239176	disease	Digestive System Diseases; Neoplasms	Neoplastic Process	5725	942	0.09		0.889	9	0	2007	2019
CXCL10	3627	Hashimoto Disease	C0677607	disease	Endocrine System Diseases	Disease or Syndrome	335	131	0.09		0.889	9	0	2003	2019
CXCL10	3627	Breast Carcinoma	C0678222	disease	Neoplasms; Skin and Connective Tissue Diseases	Neoplastic Process	6776	2793	0.09		1	9	1	2004	2019
CXCL10	3627	Rhinovirus infection	C0276447	disease	Infections	Disease or Syndrome	202	4	0.08		1	8	0	2005	2019
CXCL10	3627	Lupus Nephritis	C0024143	disease	Female Urogenital Diseases and Pregnancy Complications; Skin and Connective Tissue Diseases; Male Urogenital Diseases; Immune System Diseases	Disease or Syndrome	503	64	0.08		1	8	0	2008	2019
CXCL10	3627	Autoimmune thyroiditis	C0920350	disease	Immune System Diseases; Endocrine System Diseases	Disease or Syndrome	161	76	0.08		1	8	0	2005	2019
CXCL10	3627	Pseudohyperkalemia Cardiff	C1861453	disease	Nutritional and Metabolic Diseases	Disease or Syndrome	218	60	0.08		1	8	2	2006	2019
CXCL10	3627	Fibrosis, Liver	C0239946	disease	Pathological Conditions, Signs and Symptoms; Digestive System Diseases	Disease or Syndrome	1179	64	0.08		0.875	8	1	2012	2019
CXCL10	3627	Hepatitis	C0019158	group	Digestive System Diseases	Disease or Syndrome	656	42	0.07		1	7	0	2000	2019
CXCL10	3627	Graves Disease	C0018213	disease	Eye Diseases; Immune System Diseases; Endocrine System Diseases	Disease or Syndrome	585	352	0.07		1	7	0	2002	2019
CXCL10	3627	Colorectal Carcinoma	C0009402	disease	Digestive System Diseases; Neoplasms	Neoplastic Process	5473	1962	0.07		0.857	7	0	1997	2018
CXCL10	3627	Liver diseases	C0023895	group	Digestive System Diseases	Disease or Syndrome	1019	100	0.07		1	7	0	2001	2019
CXCL10	3627	Pneumonia	C0032285	disease	Infections; Respiratory Tract Diseases	Disease or Syndrome	1032	33	0.07		1	7	0	2008	2019
CXCL10	3627	Sjogren's Syndrome	C1527336	disease	Eye Diseases; Skin and Connective Tissue Diseases; Musculoskeletal Diseases; Immune System Diseases; Stomatognathic Diseases	Disease or Syndrome	481	47	0.07		1	7	0	2002	2020
CXCL10	3627	Infection	C3714514	group	Infections	Pathologic Function	491	0	0.06		1	6	0	2003	2008
CXCL10	3627	Fatty Liver Disease	C4529962	disease		Disease or Syndrome	741	81	0.06		1	6	0	2012	2020
CXCL10	3627	Hepatitis A	C0019159	disease	Digestive System Diseases; Infections	Disease or Syndrome	451	27	0.06		1	6	0	2000	2019
CXCL10	3627	Arthritis	C0003864	disease	Musculoskeletal Diseases	Disease or Syndrome	1072	69	0.06		1	6	0	2007	2018
CXCL10	3627	Tumor Progression	C0178874	phenotype	Pathological Conditions, Signs and Symptoms	Neoplastic Process	3865	72	0.06		1	6	0	2002	2018
CXCL10	3627	Systemic Scleroderma	C0036421	disease	Skin and Connective Tissue Diseases	Disease or Syndrome	979	287	0.06		1	6	0	2009	2019
CXCL10	3627	Alzheimer's Disease	C0002395	disease	Nervous System Diseases; Mental Disorders	Disease or Syndrome	3397	1843	0.06		0.833	6	0	2006	2018
CXCL10	3627	Diabetes	C0011847	disease	Endocrine System Diseases	Disease or Syndrome	2359	710	0.06		1	6	0	2009	2018
CXCL10	3627	Diabetes Mellitus	C0011849	group	Nutritional and Metabolic Diseases; Endocrine System Diseases	Disease or Syndrome	2803	824	0.06		1	6	0	2009	2018
CXCL10	3627	Degenerative polyarthritis	C0029408	disease	Musculoskeletal Diseases	Disease or Syndrome	1827	247	0.06		0.833	6	0	2003	2017
CXCL10	3627	Inflammatory Bowel Diseases	C0021390	group	Digestive System Diseases	Disease or Syndrome	1577	605	0.05		1	5	0	2010	2019
CXCL10	3627	Severe Acute Respiratory Syndrome	C1175175	disease	Infections; Respiratory Tract Diseases	Disease or Syndrome	117	1	0.05		1	5	0	2005	2013
CXCL10	3627	Primary Sjögren's syndrome	C0151449	disease	Eye Diseases; Skin and Connective Tissue Diseases; Musculoskeletal Diseases; Immune System Diseases; Stomatognathic Diseases	Disease or Syndrome	312	42	0.05		0.8	5	0	2018	2019
CXCL10	3627	Glioma	C0017638	disease	Neoplasms	Neoplastic Process	3097	353	0.05		0.8	5	0	2003	2018
CXCL10	3627	Lung diseases	C0024115	group	Respiratory Tract Diseases	Disease or Syndrome	700	50	0.05		1	5	0	2010	2020
CXCL10	3627	Malignant neoplasm of colon and/or rectum	C4722085	disease		Neoplastic Process	3669	502	0.05		1	5	0	2008	2018
CXCL10	3627	Complete atrioventricular block	C0151517	disease	Pathological Conditions, Signs and Symptoms; Cardiovascular Diseases	Disease or Syndrome	403	96	0.05		1	5	0	2013	2017
CXCL10	3627	ANOPHTHALMIA AND PULMONARY HYPOPLASIA	C1832661	disease	Congenital, Hereditary, and Neonatal Diseases and Abnormalities; Eye Diseases; Respiratory Tract Diseases	Disease or Syndrome	1410	80	0.05		1	5	0	2012	2019
CXCL10	3627	Liver Cirrhosis	C0023890	disease	Pathological Conditions, Signs and Symptoms; Digestive System Diseases	Disease or Syndrome	1182	189	0.05		1	5	0	2001	2017
CXCL10	3627	Psoriasis	C0033860	disease	Skin and Connective Tissue Diseases	Disease or Syndrome	1308	705	0.05		1	5	0	2001	2017
CXCL10	3627	Eczema	C0013595	disease	Skin and Connective Tissue Diseases	Disease or Syndrome	863	368	0.05		1	5	0	2001	2020
CXCL10	3627	Cerebrovascular accident	C0038454	group	Nervous System Diseases; Cardiovascular Diseases	Disease or Syndrome	1658	591	0.04		1	4	0	2000	2018
CXCL10	3627	Kidney Diseases	C0022658	group	Female Urogenital Diseases and Pregnancy Complications; Male Urogenital Diseases	Disease or Syndrome	1180	140	0.04		1	4	0	2003	2018
CXCL10	3627	Glioblastoma	C0017636	disease	Neoplasms	Neoplastic Process	3177	281	0.04		1	4	0	1997	2018
CXCL10	3627	Leishmaniasis	C0023281	disease	Infections; Skin and Connective Tissue Diseases	Disease or Syndrome	198	4	0.04		1	4	0	2010	2019
CXCL10	3627	Malaria, Cerebral	C0024534	disease	Infections; Nervous System Diseases	Disease or Syndrome	148	34	0.04		1	4	2	2013	2018
CXCL10	3627	Pain	C0030193	phenotype	Pathological Conditions, Signs and Symptoms	Sign or Symptom	1554	196	0.04		1	4	0	2011	2019
CXCL10	3627	Respiratory syncytial virus (RSV) infection in conditions classified elsewhere and of unspecified site	C0375023	disease		Disease or Syndrome	467	14	0.04		1	4	0	2001	2016
CXCL10	3627	bone destruction	C0238790	disease		Disease or Syndrome	234	3	0.04		1	4	0	2009	2017
CXCL10	3627	Dermatitis, Allergic Contact	C0162820	disease	Skin and Connective Tissue Diseases; Immune System Diseases	Disease or Syndrome	151	1	0.04		1	4	0	1999	2018
CXCL10	3627	Cirrhosis	C1623038	disease	Pathological Conditions, Signs and Symptoms	Disease or Syndrome	919	110	0.04		1	4	0	2001	2015
CXCL10	3627	Diabetic macular edema	C0730285	disease	Eye Diseases; Endocrine System Diseases; Cardiovascular Diseases	Disease or Syndrome	92	6	0.04		0.75	4	0	2017	2019
CXCL10	3627	Squamous cell carcinoma	C0007137	disease	Neoplasms	Neoplastic Process	2507	257	0.04		1	4	0	2002	2009
CXCL10	3627	Tumor Immunity	C1519680	phenotype	Pathological Conditions, Signs and Symptoms	Disease or Syndrome	337	2	0.04		1	4	0	2018	2020
CXCL10	3627	Steatohepatitis	C2711227	disease	Digestive System Diseases	Disease or Syndrome	1143	75	0.04		1	4	0	2014	2019
CXCL10	3627	Enterovirus Infections	C0014378	group	Infections	Disease or Syndrome	237	12	0.04		0.75	4	0	2006	2019
CXCL10	3627	Diabetes Mellitus, Non-Insulin-Dependent	C0011860	disease	Nutritional and Metabolic Diseases; Endocrine System Diseases	Disease or Syndrome	3134	2672	0.04		1	4	0	2014	2019
CXCL10	3627	Chorioamnionitis	C0008495	phenotype	Congenital, Hereditary, and Neonatal Diseases and Abnormalities; Female Urogenital Diseases and Pregnancy Complications	Disease or Syndrome	132	2	0.04		0.75	4	0	2003	2018
CXCL10	3627	Cryoglobulinemia	C0010403	disease	Immune System Diseases; Hemic and Lymphatic Diseases; Cardiovascular Diseases	Disease or Syndrome	37	7	0.04		1	4	0	2008	2019
CXCL10	3627	Cytomegalovirus Infections	C0010823	group	Infections	Disease or Syndrome	462	26	0.04		1	4	0	2005	2018
CXCL10	3627	Glioblastoma Multiforme	C1621958	disease	Neoplasms	Neoplastic Process	3197	186	0.04		1	4	0	1997	2018
CXCL10	3627	Dengue Fever	C0011311	disease	Infections	Disease or Syndrome	360	39	0.04		0.75	4	1	2006	2019
CXCL10	3627	Ulcerative Colitis	C0009324	disease	Digestive System Diseases	Disease or Syndrome	1458	827	0.03		1	3	0	2007	2012
CXCL10	3627	Malignant neoplasm of pancreas	C0346647	disease	Digestive System Diseases; Neoplasms; Endocrine System Diseases	Neoplastic Process	2667	277	0.03		1	3	0	2014	2017
CXCL10	3627	Mammary Neoplasms	C1458155	group	Neoplasms; Skin and Connective Tissue Diseases	Neoplastic Process	2780	385	0.03		1	3	0	2004	2017
CXCL10	3627	Lichen Planus, Oral	C0206139	disease	Skin and Connective Tissue Diseases; Stomatognathic Diseases	Disease or Syndrome	257	20	0.03		1	3	0	2003	2019
CXCL10	3627	Pancreatic carcinoma	C0235974	disease	Digestive System Diseases; Neoplasms; Endocrine System Diseases	Neoplastic Process	2689	322	0.03		1	3	0	2014	2017
CXCL10	3627	Leishmaniasis, Cutaneous	C0023283	disease	Infections; Skin and Connective Tissue Diseases	Disease or Syndrome	102	17	0.03		1	3	0	2011	2017
CXCL10	3627	Avellino corneal dystrophy	C1275685	disease	Congenital, Hereditary, and Neonatal Diseases and Abnormalities; Eye Diseases	Disease or Syndrome	115	14	0.03		1	3	0	2004	2018
CXCL10	3627	Lymphocytic infiltration	C1262091	disease		Disease or Syndrome	84	2	0.03		1	3	0	2013	2018
CXCL10	3627	Amyloidosis cutis dyschromia	C4554601	disease	Congenital, Hereditary, and Neonatal Diseases and Abnormalities; Nutritional and Metabolic Diseases; Skin and Connective Tissue Diseases	Disease or Syndrome	84	1	0.03		1	3	0	2004	2018
CXCL10	3627	Lupus Erythematosus, Discoid	C0024138	disease	Skin and Connective Tissue Diseases	Disease or Syndrome	552	46	0.03		1	3	0	2017	2018
CXCL10	3627	Anemia of chronic disease	C0002873	phenotype	Hemic and Lymphatic Diseases	Disease or Syndrome	100	1	0.03		1	3	0	2004	2018
CXCL10	3627	Thyroid associated opthalmopathies	C0339143	disease	Congenital, Hereditary, and Neonatal Diseases and Abnormalities; Eye Diseases; Immune System Diseases; Endocrine System Diseases	Disease or Syndrome	211	49	0.03		1	3	0	2014	2019
CXCL10	3627	Periodontal Diseases	C0031090	group	Stomatognathic Diseases	Disease or Syndrome	326	22	0.03		1	3	0	2008	2011
CXCL10	3627	Dermatologic disorders	C0037274	group	Skin and Connective Tissue Diseases	Disease or Syndrome	617	21	0.03		1	3	0	1999	2019
CXCL10	3627	Astrocytoma	C0004114	disease	Neoplasms	Neoplastic Process	985	59	0.03		1	3	0	2014	2017
CXCL10	3627	Neuralgia	C0027796	phenotype	Pathological Conditions, Signs and Symptoms; Nervous System Diseases	Sign or Symptom	767	16	0.03		1	3	0	2018	2019
CXCL10	3627	Nonalcoholic Steatohepatitis	C3241937	disease	Digestive System Diseases	Disease or Syndrome	434	17	0.03		1	3	0	2014	2020
CXCL10	3627	Influenza A	C2062441	disease		Disease or Syndrome	563	19	0.03		1	3	0	2013	2018
CXCL10	3627	Obesity	C0028754	disease	Pathological Conditions, Signs and Symptoms; Nutritional and Metabolic Diseases	Disease or Syndrome	2821	1111	0.03		1	3	0	2010	2018
CXCL10	3627	Coronary Artery Disease	C1956346	disease	Cardiovascular Diseases	Disease or Syndrome	1708	1577	0.03		1	3	0	2014	2017
CXCL10	3627	Multiple Myeloma	C0026764	disease	Neoplasms; Immune System Diseases; Hemic and Lymphatic Diseases; Cardiovascular Diseases	Neoplastic Process	1740	865	0.03		1	3	0	2014	2017
CXCL10	3627	Non-Small Cell Lung Carcinoma	C0007131	disease	Neoplasms; Respiratory Tract Diseases	Neoplastic Process	3926	712	0.03		1	3	0	2013	2019
CXCL10	3627	Renal Cell Carcinoma	C0007134	disease	Neoplasms; Female Urogenital Diseases and Pregnancy Complications; Male Urogenital Diseases	Neoplastic Process	2084	288	0.03		1	3	0	1999	2009
CXCL10	3627	Central Nervous System Infection	C0007684	group	Infections; Nervous System Diseases	Disease or Syndrome	44	5	0.03		1	3	0	2018	2019
CXCL10	3627	Idiopathic Pulmonary Fibrosis	C1800706	disease	Respiratory Tract Diseases	Disease or Syndrome	803	63	0.03		0.667	3	0	2010	2018
CXCL10	3627	Inflammation	C0021368	phenotype	Pathological Conditions, Signs and Symptoms	Pathologic Function	467	0	0.03		1	3	0	2001	2007
CXCL10	3627	Immunologic Deficiency Syndromes	C0021051	group	Immune System Diseases	Disease or Syndrome	973	31	0.03		1	3	0	2017	2019
CXCL10	3627	Childhood Glioblastoma	C0280474	disease	Neoplasms	Neoplastic Process	2527	98	0.03		1	3	0	1997	2018
CXCL10	3627	Endometriosis	C0014175	disease	Female Urogenital Diseases and Pregnancy Complications	Disease or Syndrome	1188	274	0.03		1	3	0	2003	2016
CXCL10	3627	Conventional (Clear Cell) Renal Cell Carcinoma	C0279702	disease	Neoplasms; Female Urogenital Diseases and Pregnancy Complications; Male Urogenital Diseases	Neoplastic Process	2346	222	0.03		1	3	0	1999	2009
CXCL10	3627	Blood spots	C4732730	disease		Disease or Syndrome	117	0	0.03		1	3	0	2018	2019
CXCL10	3627	Cytokine storm	C0919747	disease		Disease or Syndrome	97	0	0.03		0.667	3	0	2014	2018
CXCL10	3627	Hodgkin Disease	C0019829	disease	Neoplasms; Immune System Diseases; Hemic and Lymphatic Diseases	Neoplastic Process	900	148	0.03		0.667	3	0	1999	2005
CXCL10	3627	Adult Glioblastoma	C0278878	disease	Neoplasms	Neoplastic Process	2528	98	0.03		1	3	0	1997	2018
CXCL10	3627	Encephalomyelitis	C0014070	disease	Infections; Nervous System Diseases	Disease or Syndrome	865	7	0.03		1	3	0	2006	2018
CXCL10	3627	Coinfection	C0275524	phenotype	Infections	Disease or Syndrome	252	11	0.03		1	3	0	2013	2019
CXCL10	3627	Age related macular degeneration	C0242383	disease	Eye Diseases	Disease or Syndrome	685	663	0.03		1	3	0	2017	2019
CXCL10	3627	Non-alcoholic Fatty Liver Disease	C0400966	disease	Digestive System Diseases	Disease or Syndrome	1058	222	0.03		1	3	0	2017	2019
CXCL10	3627	Juvenile rheumatoid arthritis	C3714757	disease	Skin and Connective Tissue Diseases; Musculoskeletal Diseases; Immune System Diseases	Disease or Syndrome	183	10	0.02		1	2	0	2005	2006
CXCL10	3627	Osteoarthritis, Knee	C0409959	disease	Musculoskeletal Diseases	Disease or Syndrome	368	150	0.02		1	2	0	2017	2019
CXCL10	3627	Nasopharyngeal carcinoma	C2931822	disease	Neoplasms; Stomatognathic Diseases; Otorhinolaryngologic Diseases	Neoplastic Process	1553	320	0.02		1	2	0	2005	2007
CXCL10	3627	HIV-1 infection	C2363741	disease		Disease or Syndrome	695	94	0.02		1	2	0	2005	2012
CXCL10	3627	Vitiligo	C0042900	disease	Skin and Connective Tissue Diseases	Disease or Syndrome	395	249	0.02		1	2	0	2017	2018
CXCL10	3627	Prediabetes syndrome	C0362046	disease	Nutritional and Metabolic Diseases; Endocrine System Diseases	Disease or Syndrome	205	16	0.02		1	2	0	2018	2019
CXCL10	3627	Chronic infection with HIV	C0853112	disease		Disease or Syndrome	48	0	0.02		1	2	0	2019	2020
CXCL10	3627	Immune thrombocytopenic purpura	C0398650	disease	Pathological Conditions, Signs and Symptoms; Immune System Diseases; Hemic and Lymphatic Diseases	Disease or Syndrome	338	35	0.02		1	2	0	2010	2020
CXCL10	3627	Vasculitis	C0042384	disease	Cardiovascular Diseases	Disease or Syndrome	294	24	0.02		1	2	0	2008	2019
CXCL10	3627	Parvovirus B19 (disease)	C1959635	disease		Disease or Syndrome	59	0	0.02		1	2	0	2017	2018
CXCL10	3627	Acute hepatitis C	C0400914	disease	Digestive System Diseases; Infections	Disease or Syndrome	8	2	0.02		1	2	0	2012	2013
CXCL10	3627	Lymphoma, T-Cell, Cutaneous	C0079773	disease	Neoplasms; Immune System Diseases; Hemic and Lymphatic Diseases	Neoplastic Process	367	5	0.02		1	2	0	1998	2019
CXCL10	3627	Juvenile arthritis	C3495559	disease	Skin and Connective Tissue Diseases; Musculoskeletal Diseases; Immune System Diseases	Disease or Syndrome	450	128	0.02		1	2	0	2005	2006
CXCL10	3627	Lupus Erythematosus	C0409974	disease	Pathological Conditions, Signs and Symptoms; Skin and Connective Tissue Diseases; Immune System Diseases	Disease or Syndrome	558	44	0.02		1	2	0	2017	2018
CXCL10	3627	Thyroiditis	C0040147	disease	Endocrine System Diseases	Disease or Syndrome	104	7	0.02		1	2	0	2008	2017
CXCL10	3627	Severe Fever with Thrombocytopenia Syndrome	C4284413	disease	Hemic and Lymphatic Diseases	Disease or Syndrome	55	1	0.02		0.5	2	0	2017	2018
CXCL10	3627	Childhood Astrocytoma	C4086152	disease	Neoplasms	Neoplastic Process	615	39	0.02		1	2	0	2014	2015
CXCL10	3627	Aqueous Humor Disorders	C0595936	disease	Eye Diseases	Disease or Syndrome	85	1	0.02		1	2	0	2017	2019
CXCL10	3627	Respiratory Syncytial Virus Infections	C0035235	group	Infections	Disease or Syndrome	244	5	0.02		1	2	0	2015	2017
CXCL10	3627	Carcinogenesis	C0596263	phenotype	Pathological Conditions, Signs and Symptoms; Neoplasms	Neoplastic Process	6243	355	0.02		1	2	0	2015	2017
CXCL10	3627	Progressive Neoplastic Disease	C0677932	phenotype		Neoplastic Process	384	40	0.02		1	2	0	2015	2019
CXCL10	3627	Sarcoidosis	C0036202	disease	Hemic and Lymphatic Diseases	Disease or Syndrome	413	787	0.02		1	2	0	2006	2020
CXCL10	3627	cervical cancer	C4048328	disease	Neoplasms; Female Urogenital Diseases and Pregnancy Complications	Neoplastic Process	1817	268	0.02		1	2	0	2007	2009
CXCL10	3627	Septicemia	C0036690	disease	Pathological Conditions, Signs and Symptoms; Infections	Disease or Syndrome	1285	141	0.02		1	2	0	2019	2020
CXCL10	3627	Acute-On-Chronic Liver Failure	C3850141	disease	Digestive System Diseases	Disease or Syndrome	140	5	0.02		1	2	0	2018	2019
CXCL10	3627	Situs Inversus	C0037221	disease	Congenital, Hereditary, and Neonatal Diseases and Abnormalities	Congenital Abnormality	138	6	0.02		0.5	2	0	2016	2018
CXCL10	3627	Mixed cryoglobulinemia	C0543697	disease	Immune System Diseases; Hemic and Lymphatic Diseases; Cardiovascular Diseases	Disease or Syndrome	56	5	0.02		1	2	0	2008	2014
CXCL10	3627	Stomach Carcinoma	C0699791	disease	Digestive System Diseases; Neoplasms	Neoplastic Process	3720	652	0.02		1	2	0	2011	2018
CXCL10	3627	Pneumonitis	C3714636	disease	Infections; Respiratory Tract Diseases	Disease or Syndrome	697	13	0.02		1	2	0	2008	2018
CXCL10	3627	Carcinoma of bladder	C0699885	disease	Neoplasms; Female Urogenital Diseases and Pregnancy Complications; Male Urogenital Diseases	Neoplastic Process	2104	309	0.02		1	2	0	2005	2019
CXCL10	3627	Autoimmune hepatitis	C4721555	disease	Digestive System Diseases	Disease or Syndrome	190	22	0.02		1	2	0	2001	2018
CXCL10	3627	Bacterial Vaginosis	C0085166	disease	Female Urogenital Diseases and Pregnancy Complications; Infections	Disease or Syndrome	73	15	0.02		1	2	0	2016	2017
CXCL10	3627	Adult-Onset Still Disease	C0085253	disease	Skin and Connective Tissue Diseases; Musculoskeletal Diseases; Immune System Diseases	Disease or Syndrome	76	5	0.02		1	2	0	2017	2019
CXCL10	3627	Malignant neoplasm of esophagus	C0546837	disease	Digestive System Diseases; Neoplasms	Neoplastic Process	1286	214	0.02		1	2	0	2012	2017
CXCL10	3627	Lung Diseases, Interstitial	C0206062	group	Respiratory Tract Diseases	Disease or Syndrome	319	144	0.02		1	2	0	2010	2018
CXCL10	3627	Thrombocytopenia due to platelet alloimmunization	C0272286	disease	Hemic and Lymphatic Diseases	Disease or Syndrome	111	7	0.02		1	2	0	2010	2020
CXCL10	3627	Adult Hodgkin Lymphoma	C0220597	disease	Neoplasms; Immune System Diseases; Hemic and Lymphatic Diseases	Neoplastic Process	399	27	0.02		1	2	0	2002	2005
CXCL10	3627	Uveal melanoma	C0220633	disease	Neoplasms; Eye Diseases	Neoplastic Process	376	22	0.02		0.5	2	0	2018	2019
CXCL10	3627	Childhood Hodgkin Lymphoma	C0220644	disease	Neoplasms; Immune System Diseases; Hemic and Lymphatic Diseases	Neoplastic Process	399	29	0.02		1	2	0	2002	2005
CXCL10	3627	Adult type dermatomyositis	C0221056	disease	Skin and Connective Tissue Diseases; Musculoskeletal Diseases; Nervous System Diseases	Disease or Syndrome	218	31	0.02		1	2	0	2017	2018
CXCL10	3627	Sepsis	C0243026	disease	Pathological Conditions, Signs and Symptoms; Infections	Disease or Syndrome	1453	144	0.02		1	2	0	2019	2020
CXCL10	3627	Childhood Leukemia	C1332977	disease	Neoplasms	Neoplastic Process	1740	140	0.02		1	2	0	1987	2017
CXCL10	3627	Papillary thyroid carcinoma	C0238463	disease	Neoplasms; Endocrine System Diseases	Neoplastic Process	1348	204	0.02		1	2	0	2009	2018
CXCL10	3627	Hantavirus Infections	C0242994	group	Infections	Disease or Syndrome	108	10	0.02		1	2	0	1999	2017
CXCL10	3627	Autoimmune thrombocytopenia	C0242584	disease	Immune System Diseases; Hemic and Lymphatic Diseases	Disease or Syndrome	115	7	0.02		1	2	0	2010	2020
CXCL10	3627	Macrophage Activation Syndrome	C1096155	disease	Immune System Diseases	Disease or Syndrome	57	6	0.02		1	2	0	2017	2018
CXCL10	3627	HIV disease progression	C1141957	disease		Disease or Syndrome	54	5	0.02		1	2	0	2019	2019
CXCL10	3627	Zika Virus Infection	C0276289	disease	Infections	Disease or Syndrome	192	1	0.02		1	2	0	2018	2019
CXCL10	3627	Mumps virus infection	C0858009	disease		Disease or Syndrome	8	0	0.02		1	2	0	2017	2018
CXCL10	3627	Acute type B viral hepatitis	C0276609	disease	Digestive System Diseases; Infections	Disease or Syndrome	38	0	0.02		1	2	0	2016	2019
CXCL10	3627	CATARACT, ANTERIOR POLAR	C1855179	disease	Eye Diseases	Disease or Syndrome	125	27	0.02		1	2	0	2017	2018
CXCL10	3627	PEELING SKIN SYNDROME	C1849193	disease	Congenital, Hereditary, and Neonatal Diseases and Abnormalities; Skin and Connective Tissue Diseases	Disease or Syndrome	67	11	0.02		1	2	0	2018	2019
CXCL10	3627	Pancreatitis, Chronic	C0149521	disease	Digestive System Diseases	Disease or Syndrome	379	56	0.02		1	2	0	2007	2015
CXCL10	3627	Epstein-Barr Virus Infections	C0149678	group	Infections	Disease or Syndrome	384	72	0.02		0.5	2	0	1999	2005
CXCL10	3627	Active tuberculosis	C0151332	disease	Infections	Disease or Syndrome	116	25	0.02		1	2	0	2019	2019
CXCL10	3627	VITILIGO-ASSOCIATED MULTIPLE AUTOIMMUNE DISEASE SUSCEPTIBILITY 1 (finding)	C1847835	disease	Skin and Connective Tissue Diseases	Disease or Syndrome	302	92	0.02		1	2	0	2017	2018
CXCL10	3627	Impaired cognition	C0338656	disease	Mental Disorders	Mental or Behavioral Dysfunction	1630	348	0.02		1	2	0	2017	2018
CXCL10	3627	Tumor Angiogenesis	C1519670	phenotype	Pathological Conditions, Signs and Symptoms	Neoplastic Process	822	5	0.02		1	2	0	2004	2017
CXCL10	3627	Chromosome 11p11.2 Deletion Syndrome	C1832588	disease	Pathological Conditions, Signs and Symptoms; Congenital, Hereditary, and Neonatal Diseases and Abnormalities; Neoplasms; Musculoskeletal Diseases	Disease or Syndrome	65	6	0.02		1	2	0	2018	2019
CXCL10	3627	Esophageal carcinoma	C0152018	disease	Digestive System Diseases; Neoplasms	Neoplastic Process	1287	272	0.02		1	2	0	2012	2017
CXCL10	3627	Chronic graft-versus-host disease	C0867389	disease	Immune System Diseases	Disease or Syndrome	241	17	0.02		1	2	0	2016	2020
CXCL10	3627	Progressive cGVHD	C3539781	disease		Disease or Syndrome	384	40	0.02		1	2	0	2015	2019
CXCL10	3627	tumor vasculature	C1658953	phenotype		Neoplastic Process	200	0	0.02		1	2	0	1998	2017
CXCL10	3627	Endothelial dysfunction	C0856169	phenotype		Disease or Syndrome	716	25	0.02		1	2	0	2012	2018
CXCL10	3627	Autoimmune Chronic Hepatitis	C0241910	disease	Digestive System Diseases; Immune System Diseases	Disease or Syndrome	213	23	0.02		1	2	0	2001	2018
CXCL10	3627	Congestive heart failure	C0018802	disease	Cardiovascular Diseases	Disease or Syndrome	1760	165	0.02		1	2	0	2019	2019
CXCL10	3627	Lymphocytic Choriomeningitis	C0024266	disease	Infections; Nervous System Diseases	Disease or Syndrome	147	0	0.02		1	2	0	2008	2017
CXCL10	3627	Myocardial Infarction	C0027051	disease	Pathological Conditions, Signs and Symptoms; Cardiovascular Diseases	Disease or Syndrome	1800	680	0.02		1	2	0	2014	2016
CXCL10	3627	Arteriosclerosis	C0003850	disease	Cardiovascular Diseases	Disease or Syndrome	2006	267	0.02		1	2	0	2012	2014
CXCL10	3627	Hyperglycemia	C0020456	disease	Nutritional and Metabolic Diseases	Disease or Syndrome	1098	108	0.02		1	2	0	2009	2016
CXCL10	3627	Keratitis, Herpetic	C0019357	disease	Infections; Eye Diseases	Disease or Syndrome	23	1	0.02		1	2	0	2017	2017
CXCL10	3627	Encephalitis, St. Louis	C0014060	disease	Infections; Nervous System Diseases	Disease or Syndrome	272	34	0.02		1	2	0	2014	2017
CXCL10	3627	Anemia, Sickle Cell	C0002895	disease	Congenital, Hereditary, and Neonatal Diseases and Abnormalities; Hemic and Lymphatic Diseases	Disease or Syndrome	434	138	0.02		1	2	0	2012	2019
CXCL10	3627	Japanese Encephalitis	C0014057	disease	Infections; Nervous System Diseases	Disease or Syndrome	119	6	0.02		1	2	0	2007	2018
CXCL10	3627	Lupus Vulgaris	C0024131	disease	Infections; Skin and Connective Tissue Diseases	Disease or Syndrome	526	44	0.02		1	2	0	2017	2018
CXCL10	3627	Diabetic Retinopathy	C0011884	disease	Eye Diseases; Endocrine System Diseases; Cardiovascular Diseases	Disease or Syndrome	645	213	0.02		1	2	0	2017	2020
CXCL10	3627	Myasthenia Gravis	C0026896	disease	Neoplasms; Immune System Diseases; Nervous System Diseases	Disease or Syndrome	336	93	0.02		1	2	0	2005	2016
CXCL10	3627	Lymphohistiocytosis, Hemophagocytic	C0024291	disease	Hemic and Lymphatic Diseases	Disease or Syndrome	117	13	0.02		1	2	0	2003	2017
CXCL10	3627	Behcet Syndrome	C0004943	disease	Congenital, Hereditary, and Neonatal Diseases and Abnormalities; Eye Diseases; Skin and Connective Tissue Diseases; Stomatognathic Diseases; Cardiovascular Diseases	Disease or Syndrome	502	243	0.02		1	2	0	2015	2017
CXCL10	3627	Heart failure	C0018801	disease	Cardiovascular Diseases	Disease or Syndrome	1499	201	0.02		1	2	0	2019	2019
CXCL10	3627	Bladder Neoplasm	C0005695	disease	Neoplasms; Female Urogenital Diseases and Pregnancy Complications; Male Urogenital Diseases	Neoplastic Process	2130	281	0.02		1	2	0	2005	2019
CXCL10	3627	Meningitis	C0025289	disease	Nervous System Diseases	Disease or Syndrome	191	13	0.02		1	2	0	2017	2019
CXCL10	3627	Malignant neoplasm of stomach	C0024623	disease	Digestive System Diseases; Neoplasms	Neoplastic Process	3806	615	0.02		1	2	0	2011	2018
CXCL10	3627	Lymphoma	C0024299	group	Neoplasms; Immune System Diseases; Hemic and Lymphatic Diseases	Neoplastic Process	1548	91	0.02		1	2	0	2013	2018
CXCL10	3627	Dermatomyositis	C0011633	disease	Skin and Connective Tissue Diseases; Musculoskeletal Diseases; Nervous System Diseases	Disease or Syndrome	235	34	0.02		1	2	0	2017	2018
CXCL10	3627	Atherosclerosis	C0004153	disease	Cardiovascular Diseases	Disease or Syndrome	2044	281	0.02		1	2	0	2012	2014
CXCL10	3627	Bronchiolitis Obliterans	C0006272	disease	Respiratory Tract Diseases	Disease or Syndrome	93	5	0.02		0.5	2	0	2006	2019
CXCL10	3627	leukemia	C0023418	disease	Neoplasms	Neoplastic Process	2111	144	0.02		1	2	0	1987	2017
CXCL10	3627	AIDS Dementia Complex	C0001849	disease	Infections; Immune System Diseases; Nervous System Diseases; Mental Disorders	Disease or Syndrome	45	4	0.02		1	2	0	2005	2007
CXCL10	3627	Erythema Chronicum Migrans	C0014740	disease	Infections; Skin and Connective Tissue Diseases	Disease or Syndrome	41	0	0.02		1	2	0	2008	2012
CXCL10	3627	Fatigue	C0015672	phenotype	Pathological Conditions, Signs and Symptoms	Sign or Symptom	760	67	0.02		1	2	0	2018	2018
CXCL10	3627	Colitis	C0009319	disease	Digestive System Diseases	Disease or Syndrome	1135	15	0.02		1	2	0	2012	2020
CXCL10	3627	Glomerulonephritis	C0017658	disease	Female Urogenital Diseases and Pregnancy Complications; Male Urogenital Diseases	Disease or Syndrome	391	7	0.02		1	2	0	2002	2011
CXCL10	3627	Leprosy	C0023343	disease	Infections	Disease or Syndrome	190	120	0.02		1	2	0	2014	2017
CXCL10	3627	Glossitis, Benign Migratory	C0017677	disease	Stomatognathic Diseases	Disease or Syndrome	53	1	0.02		1	2	0	2008	2012
CXCL10	3627	Malignant neoplasm of urinary bladder	C0005684	disease	Neoplasms; Female Urogenital Diseases and Pregnancy Complications; Male Urogenital Diseases	Neoplastic Process	2113	316	0.02		1	2	0	2005	2019
CXCL10	3627	Acquired Immunodeficiency Syndrome	C0001175	group	Infections; Immune System Diseases	Disease or Syndrome	243	42	0.02		1	2	0	2005	2019
CXCL10	3627	Esophageal Neoplasms	C0014859	group	Digestive System Diseases; Neoplasms	Neoplastic Process	1254	270	0.02		1	2	0	2012	2017
CXCL10	3627	Aplastic Anemia	C0002874	disease	Hemic and Lymphatic Diseases	Disease or Syndrome	238	30	0.02		1	2	0	2013	2017
CXCL10	3627	Pancreatic Ductal Adenocarcinoma	C1335302	disease	Digestive System Diseases; Neoplasms; Endocrine System Diseases	Neoplastic Process	970	22	0.01		1	1	0	2019	2019
CXCL10	3627	Invasive Fungal Infections	C1262313	group	Infections	Disease or Syndrome	52	5	0.01		1	1	0	2019	2019
CXCL10	3627	Cancer cachexia	C1391732	disease		Neoplastic Process	110	1	0.01		0	1	0	2018	2018
CXCL10	3627	Systemic onset juvenile chronic arthritis	C1384600	disease	Skin and Connective Tissue Diseases; Musculoskeletal Diseases; Immune System Diseases	Disease or Syndrome	90	53	0.01		1	1	0	2017	2017
CXCL10	3627	Mycobacterium leprae infection	C1411934	disease		Disease or Syndrome	6	1	0.01		1	1	0	2017	2017
CXCL10	3627	Presenile dementia	C0011265	disease	Nervous System Diseases; Mental Disorders	Mental or Behavioral Dysfunction	718	159	0.01		1	1	0	2012	2012
CXCL10	3627	Myasthenias	C0947912	disease	Pathological Conditions, Signs and Symptoms; Musculoskeletal Diseases; Nervous System Diseases	Disease or Syndrome	41	3	0.01		1	1	0	2005	2005
CXCL10	3627	Bacteroides fragilis infection in conditions classified elsewhere and of unspecified site	C1456246	disease		Disease or Syndrome	43	0	0.01		1	1	0	2017	2017
CXCL10	3627	Stromal keratitis	C1318020	disease	Eye Diseases	Disease or Syndrome	15	0	0.01		1	1	0	2017	2017
CXCL10	3627	Diffuse Scleroderma	C1258104	disease	Skin and Connective Tissue Diseases	Disease or Syndrome	56	5	0.01		1	1	0	2018	2018
CXCL10	3627	Ocular syphilis	C1444605	disease	Female Urogenital Diseases and Pregnancy Complications; Infections; Eye Diseases; Male Urogenital Diseases	Disease or Syndrome	5	0	0.01		1	1	0	2018	2018
CXCL10	3627	Sarcoma	C1261473	group	Neoplasms	Neoplastic Process	853	42	0.01		1	1	0	2017	2017
CXCL10	3627	Glial scar	C1262048	phenotype		Acquired Abnormality	51	0	0.01		1	1	0	2017	2017
CXCL10	3627	Delirium	C0011206	disease	Pathological Conditions, Signs and Symptoms; Nervous System Diseases; Mental Disorders; Behavior and Behavior Mechanisms	Mental or Behavioral Dysfunction	110	7	0.01		1	1	0	2018	2018
CXCL10	3627	Lower respiratory tract inflammation	C1167659	disease		Disease or Syndrome	1	0	0.01		1	1	0	2018	2018
CXCL10	3627	Cystitis	C0010692	disease	Female Urogenital Diseases and Pregnancy Complications; Male Urogenital Diseases	Disease or Syndrome	149	0	0.01		1	1	0	2019	2019
CXCL10	3627	Cystic Fibrosis	C0010674	disease	Congenital, Hereditary, and Neonatal Diseases and Abnormalities; Digestive System Diseases; Respiratory Tract Diseases	Disease or Syndrome	852	704	0.01		1	1	0	2011	2011
CXCL10	3627	Adult Diffuse Large B-Cell Lymphoma	C1332201	disease	Neoplasms; Immune System Diseases; Hemic and Lymphatic Diseases	Neoplastic Process	504	46	0.01		1	1	0	2017	2017
CXCL10	3627	Adult Diffuse Astrocytoma	C1332200	disease	Neoplasms	Neoplastic Process	21	2	0.01		1	1	0	2017	2017
CXCL10	3627	Adult Lymphoma	C1332206	disease	Neoplasms; Immune System Diseases; Hemic and Lymphatic Diseases	Neoplastic Process	1169	66	0.01		1	1	0	2013	2013
CXCL10	3627	Mucocutaneous leishmaniasis	C1328252	disease	Infections; Skin and Connective Tissue Diseases	Disease or Syndrome	37	0	0.01		1	1	0	2010	2010
CXCL10	3627	Eosinophilic disorder	C1306759	group	Hemic and Lymphatic Diseases	Disease or Syndrome	288	22	0.01		1	1	0	2001	2001
CXCL10	3627	Coronary heart disease	C0010068	disease	Cardiovascular Diseases	Disease or Syndrome	1576	1178	0.01		1	1	0	2017	2017
CXCL10	3627	Coronary Arteriosclerosis	C0010054	disease	Cardiovascular Diseases	Disease or Syndrome	1282	440	0.01		1	1	0	2017	2017
CXCL10	3627	Chronic myeloproliferative disorder	C1292778	disease	Neoplasms; Hemic and Lymphatic Diseases	Neoplastic Process	366	47	0.01		1	1	0	2017	2017
CXCL10	3627	Precursor B-cell lymphoblastic leukemia	C1292769	disease	Neoplasms; Immune System Diseases; Hemic and Lymphatic Diseases	Neoplastic Process	478	23	0.01		1	1	0	2019	2019
CXCL10	3627	Childhood Lymphoma	C1332979	disease	Neoplasms; Immune System Diseases; Hemic and Lymphatic Diseases	Neoplastic Process	1171	66	0.01		1	1	0	2013	2013
CXCL10	3627	Craniosynostosis	C0010278	disease	Congenital, Hereditary, and Neonatal Diseases and Abnormalities; Musculoskeletal Diseases	Disease or Syndrome	488	90	0.01		1	1	0	2013	2013
CXCL10	3627	Familial Multiple Lipomatosis	C1275273	disease	Congenital, Hereditary, and Neonatal Diseases and Abnormalities; Nutritional and Metabolic Diseases; Skin and Connective Tissue Diseases	Disease or Syndrome	3	0	0.01		1	1	0	2019	2019
CXCL10	3627	Childhood Osteosarcoma	C1332986	disease	Neoplasms	Neoplastic Process	2208	151	0.01		1	1	0	2017	2017
CXCL10	3627	BB leprosy	C1389289	disease		Disease or Syndrome	1	0	0.01		1	1	0	2015	2015
CXCL10	3627	Inflammatory disorder	C1290884	group	Pathological Conditions, Signs and Symptoms	Disease or Syndrome	391	8	0.01		1	1	0	2013	2013
CXCL10	3627	Intestinal Graft Versus Host Disease	C1334228	disease	Immune System Diseases	Disease or Syndrome	12	0	0.01		1	1	0	2016	2016
CXCL10	3627	Crohn Disease	C0010346	disease	Digestive System Diseases	Disease or Syndrome	1382	1147	0.01		1	1	0	2017	2017
CXCL10	3627	Segmental vitiligo	C1274648	disease	Skin and Connective Tissue Diseases	Disease or Syndrome	17	5	0.01		1	1	0	2017	2017
CXCL10	3627	Fever	C0015967	phenotype	Pathological Conditions, Signs and Symptoms	Sign or Symptom	1021	66	0.01		1	1	0	2018	2018
CXCL10	3627	eyes dry chronic	C0743746	disease		Disease or Syndrome	2	0	0.01		1	1	0	2018	2018
CXCL10	3627	Acute respiratory distress	C0748355	disease	Pathological Conditions, Signs and Symptoms; Respiratory Tract Diseases	Disease or Syndrome	147	6	0.01		1	1	0	2017	2017
CXCL10	3627	Granulomatous uveitis	C0750046	disease	Eye Diseases	Disease or Syndrome	16	0	0.01		1	1	0	2018	2018
CXCL10	3627	Idiopathic Inflammatory Myopathies	C0751356	disease	Musculoskeletal Diseases; Nervous System Diseases	Disease or Syndrome	106	4	0.01		1	1	0	2009	2009
CXCL10	3627	Inclusion Body Myopathy, Sporadic	C0751713	disease	Musculoskeletal Diseases; Nervous System Diseases	Disease or Syndrome	84	5	0.01		1	1	0	2003	2003
CXCL10	3627	Osteosarcoma of bone	C0585442	disease	Neoplasms	Neoplastic Process	2247	151	0.01		1	1	0	2017	2017
CXCL10	3627	Multiple Sclerosis, Primary Progressive	C0751964	disease	Immune System Diseases; Nervous System Diseases	Disease or Syndrome	37	2	0.01		1	1	0	2017	2017
CXCL10	3627	Multiple Sclerosis, Relapsing-Remitting	C0751967	disease	Immune System Diseases; Nervous System Diseases	Disease or Syndrome	206	7	0.01		1	1	0	2019	2019
CXCL10	3627	Malignant Pleural Mesothelioma	C0812413	disease	Neoplasms; Respiratory Tract Diseases	Neoplastic Process	421	15	0.01		1	1	0	2005	2005
CXCL10	3627	cyst benign	C0742960	disease		Disease or Syndrome	9	0	0.01		1	1	0	2014	2014
CXCL10	3627	allergic symptom	C0740903	phenotype		Sign or Symptom	37	2	0.01		1	1	0	2017	2017
CXCL10	3627	Middle Cerebral Artery Occlusion	C0740391	disease	Pathological Conditions, Signs and Symptoms; Nervous System Diseases; Cardiovascular Diseases	Acquired Abnormality	626	0	0.01		1	1	0	2015	2015
CXCL10	3627	Fetal Alcohol Syndrome	C0015923	disease	Congenital, Hereditary, and Neonatal Diseases and Abnormalities; Female Urogenital Diseases and Pregnancy Complications; Chemically-Induced Disorders	Disease or Syndrome	89	8	0.01		1	1	0	2019	2019
CXCL10	3627	Fatty Liver	C0015695	disease	Digestive System Diseases	Disease or Syndrome	875	35	0.01		1	1	0	2014	2014
CXCL10	3627	Eye Infection	C0015403	group	Infections; Eye Diseases	Disease or Syndrome	24	0	0.01		1	1	0	2018	2018
CXCL10	3627	Disorder of eye	C0015397	group	Eye Diseases	Disease or Syndrome	400	14	0.01		1	1	0	2014	2014
CXCL10	3627	Tuberculosis, extrapulmonary	C0679362	disease	Infections	Disease or Syndrome	58	21	0.01		1	1	0	2019	2019
CXCL10	3627	Central Diabetes Insipidus	C0687720	disease	Female Urogenital Diseases and Pregnancy Complications; Male Urogenital Diseases; Endocrine System Diseases	Disease or Syndrome	105	21	0.01		1	1	0	2019	2019
CXCL10	3627	Colon Carcinoma	C0699790	disease	Digestive System Diseases; Neoplasms	Neoplastic Process	2832	275	0.01		1	1	0	2006	2006
CXCL10	3627	Exanthema	C0015230	phenotype	Skin and Connective Tissue Diseases	Sign or Symptom	251	14	0.01		1	1	0	2018	2018
CXCL10	3627	Central neuroblastoma	C0700095	disease	Neoplasms; Nervous System Diseases	Neoplastic Process	2419	231	0.01		1	1	0	2017	2017
CXCL10	3627	Arteriopathic disease	C0852949	group	Pathological Conditions, Signs and Symptoms; Cardiovascular Diseases	Disease or Syndrome	101	14	0.01		1	1	0	2019	2019
CXCL10	3627	Eosinophilia	C0014457	disease	Hemic and Lymphatic Diseases	Disease or Syndrome	325	23	0.01		1	1	0	2001	2001
CXCL10	3627	Dentinogenesis Imperfecta	C0011436	disease	Congenital, Hereditary, and Neonatal Diseases and Abnormalities; Stomatognathic Diseases	Congenital Abnormality	35	7	0.01		1	1	0	1996	1996
CXCL10	3627	Vascular inflammations	C0947751	phenotype	Cardiovascular Diseases	Disease or Syndrome	305	3	0.01		1	1	0	2018	2018
CXCL10	3627	airway disease	C0699949	disease	Pathological Conditions, Signs and Symptoms; Respiratory Tract Diseases	Disease or Syndrome	198	1	0.01		1	1	0	2017	2017
CXCL10	3627	Alloimmunisation	C0948201	disease		Disease or Syndrome	65	3	0.01		1	1	0	2017	2017
CXCL10	3627	Neuroborreliosis	C0948264	disease	Infections	Disease or Syndrome	12	0	0.01		1	1	0	2018	2018
CXCL10	3627	Euthymia	C0948853	disease		Mental or Behavioral Dysfunction	10	1	0.01		1	1	0	2018	2018
CXCL10	3627	Spondylarthritis	C0949690	disease	Musculoskeletal Diseases	Disease or Syndrome	158	23	0.01		1	1	0	2007	2007
CXCL10	3627	Dental caries	C0011334	disease	Stomatognathic Diseases	Disease or Syndrome	330	126	0.01		1	1	0	2007	2007
CXCL10	3627	Malignant neoplasm of ovary	C1140680	disease	Neoplasms; Female Urogenital Diseases and Pregnancy Complications; Endocrine System Diseases	Neoplastic Process	2563	315	0.01		1	1	0	2012	2012
CXCL10	3627	ovarian neoplasm	C0919267	disease	Neoplasms; Female Urogenital Diseases and Pregnancy Complications; Endocrine System Diseases	Neoplastic Process	2542	757	0.01		1	1	0	2012	2012
CXCL10	3627	Diabetic Nephropathy	C0011881	disease	Female Urogenital Diseases and Pregnancy Complications; Male Urogenital Diseases; Endocrine System Diseases	Disease or Syndrome	1189	238	0.01		1	1	0	2018	2018
CXCL10	3627	Overactive Bladder	C0878773	disease	Pathological Conditions, Signs and Symptoms; Female Urogenital Diseases and Pregnancy Complications; Male Urogenital Diseases	Disease or Syndrome	65	3	0.01		1	1	0	2018	2018
CXCL10	3627	Diabetic Cardiomyopathies	C0853897	disease	Endocrine System Diseases; Cardiovascular Diseases	Disease or Syndrome	220	1	0.01		1	1	0	2016	2016
CXCL10	3627	Endometrial Neoplasms	C0014170	group	Neoplasms; Female Urogenital Diseases and Pregnancy Complications	Neoplastic Process	261	32	0.01		1	1	0	2007	2007
CXCL10	3627	Acute GVH disease	C0856825	disease	Immune System Diseases	Disease or Syndrome	294	49	0.01		1	1	0	2017	2017
CXCL10	3627	Breast adenocarcinoma	C0858252	disease	Neoplasms; Skin and Connective Tissue Diseases	Neoplastic Process	219	7	0.01		1	1	0	2004	2004
CXCL10	3627	Leishmania infantum disease	C0860027	disease		Disease or Syndrome	11	0	0.01		1	1	0	2017	2017
CXCL10	3627	Cholestatic liver disease	C0860204	disease	Digestive System Diseases	Disease or Syndrome	58	0	0.01		1	1	0	2018	2018
CXCL10	3627	Disseminated leishmaniasis	C0860236	disease		Disease or Syndrome	8	0	0.01		1	1	0	2011	2011
CXCL10	3627	Cytomegalovirus viremia	C0877635	disease	Pathological Conditions, Signs and Symptoms; Infections	Disease or Syndrome	17	2	0.01		1	1	0	2018	2018
CXCL10	3627	Cardiomyopathies	C0878544	group	Cardiovascular Diseases	Disease or Syndrome	925	294	0.01		1	1	0	2016	2016
CXCL10	3627	Demyelinating Diseases	C0011303	group	Nervous System Diseases	Disease or Syndrome	156	5	0.01		1	1	0	2018	2018
CXCL10	3627	Bacteremia	C0004610	disease	Pathological Conditions, Signs and Symptoms; Infections	Disease or Syndrome	233	7	0.01		1	1	0	2017	2017
CXCL10	3627	Enterovirus 71 infection	C3853962	disease	Infections	Disease or Syndrome	21	2	0.01		1	1	0	2014	2014
CXCL10	3627	Inflammatory dermatosis	C3875321	disease	Skin and Connective Tissue Diseases	Disease or Syndrome	382	6	0.01		1	1	0	2001	2001
CXCL10	3627	Skin Erosion	C3887524	disease	Skin and Connective Tissue Diseases	Disease or Syndrome	225	2	0.01		1	1	0	2011	2011
CXCL10	3627	Nonnuclear polymorphic congenital cataract	C3888391	disease		Congenital Abnormality	71	0	0.01		1	1	0	2014	2014
CXCL10	3627	Post-Hemorrhagic Hydrocephalus	C3897877	disease	Nervous System Diseases	Disease or Syndrome	9	0	0.01		1	1	0	2017	2017
CXCL10	3627	Early Rheumatoid Arthritis	C3899278	disease	Skin and Connective Tissue Diseases; Musculoskeletal Diseases; Immune System Diseases	Disease or Syndrome	83	5	0.01		1	1	0	2017	2017
CXCL10	3627	Childhood Diffuse Astrocytoma	C3899668	disease	Neoplasms	Neoplastic Process	21	2	0.01		1	1	0	2017	2017
CXCL10	3627	Overactive bladder syndrome	C4020898	disease		Disease or Syndrome	9	0	0.01		1	1	0	2018	2018
CXCL10	3627	Nongranulomatous uveitis	C4024795	disease	Eye Diseases	Disease or Syndrome	14	0	0.01		1	1	0	2018	2018
CXCL10	3627	Aortic Valve Insufficiency	C0003504	disease	Cardiovascular Diseases	Disease or Syndrome	377	8	0.01		0	1	0	2017	2017
CXCL10	3627	Appendicitis	C0003615	disease	Digestive System Diseases; Infections	Disease or Syndrome	83	10	0.01		1	1	0	2019	2019
CXCL10	3627	Tuberculosis in children	C3825570	disease		Disease or Syndrome	6	0	0.01		1	1	0	2019	2019
CXCL10	3627	Fulminant type 1 diabetes mellitus	C3495814	disease		Disease or Syndrome	9	0	0.01		1	1	0	2019	2019
CXCL10	3627	Triple Negative Breast Neoplasms	C3539878	disease	Neoplasms; Skin and Connective Tissue Diseases	Neoplastic Process	1674	99	0.01		1	1	0	2019	2019
CXCL10	3627	Ascites	C0003962	phenotype	Pathological Conditions, Signs and Symptoms	Disease or Syndrome	198	7	0.01		1	1	0	2019	2019
CXCL10	3627	Allergic sensitization	C3662483	disease		Disease or Syndrome	85	26	0.01		1	1	0	2017	2017
CXCL10	3627	Neutrophilia (disorder)	C3665444	disease	Pathological Conditions, Signs and Symptoms; Hemic and Lymphatic Diseases	Disease or Syndrome	150	1	0.01		1	1	0	2014	2014
CXCL10	3627	Middle East Respiratory Syndrome	C3694279	disease	Infections	Disease or Syndrome	53	0	0.01		1	1	0	2018	2018
CXCL10	3627	Arthritis, Psoriatic	C0003872	disease	Skin and Connective Tissue Diseases; Musculoskeletal Diseases	Disease or Syndrome	450	89	0.01		1	1	0	2016	2016
CXCL10	3627	Arthritis, Infectious	C0003869	group	Infections; Musculoskeletal Diseases	Disease or Syndrome	33	0	0.01		1	1	0	2003	2003
CXCL10	3627	Experimental Organism Basal Cell Carcinoma	C3811653	phenotype	Neoplasms	Neoplastic Process	437	63	0.01		1	1	0	2013	2013
CXCL10	3627	Immunosuppression	C4048329	disease		Disease or Syndrome	632	9	0.01		1	1	0	2018	2018
CXCL10	3627	Chronic hepatitis C genotype 4	C4049431	disease		Disease or Syndrome	10	3	0.01		1	1	0	2013	2013
CXCL10	3627	Encephalitis caused by tick-borne encephalitis virus	C4076533	disease	Infections; Nervous System Diseases	Disease or Syndrome	5	0	0.01		1	1	0	2018	2018
CXCL10	3627	Adrenal Gland Pheochromocytoma	C4551683	disease	Neoplasms; Endocrine System Diseases	Neoplastic Process	416	50	0.01		1	1	0	2014	2014
CXCL10	3627	Malignant neoplasm of soft tissue	C4551686	group	Neoplasms	Neoplastic Process	699	32	0.01		1	1	0	2017	2017
CXCL10	3627	Sarcoma of soft tissue	C4551687	group	Neoplasms	Neoplastic Process	258	6	0.01		1	1	0	2017	2017
CXCL10	3627	Adenitis	C0001416	phenotype	Hemic and Lymphatic Diseases	Sign or Symptom	9	1	0.01		1	1	0	2015	2015
CXCL10	3627	Addison Disease	C0001403	disease	Immune System Diseases; Endocrine System Diseases	Disease or Syndrome	111	13	0.01		1	1	0	2013	2013
CXCL10	3627	Acute periodontitis	C0001342	disease	Stomatognathic Diseases	Disease or Syndrome	130	49	0.01		1	1	0	2003	2003
CXCL10	3627	Carcinoma, Ovarian Epithelial	C4721610	disease	Neoplasms; Female Urogenital Diseases and Pregnancy Complications; Endocrine System Diseases	Neoplastic Process	2841	327	0.01		1	1	0	2012	2012
CXCL10	3627	Carcinoma, Basal Cell	C4721806	disease	Neoplasms	Neoplastic Process	557	91	0.01		1	1	0	2013	2013
CXCL10	3627	Triple-Negative Breast Carcinoma	C4722518	disease	Neoplasms; Skin and Connective Tissue Diseases	Neoplastic Process	1598	96	0.01		1	1	0	2019	2019
CXCL10	3627	Airway Obstruction	C0001883	group	Respiratory Tract Diseases	Disease or Syndrome	110	5	0.01		1	1	0	2011	2011
CXCL10	3627	Congenital atresia of extrahepatic bile duct	C4520983	disease	Congenital, Hereditary, and Neonatal Diseases and Abnormalities; Digestive System Diseases	Congenital Abnormality	172	19	0.01		1	1	0	2001	2001
CXCL10	3627	Stage 0 Breast Cancer AJCC v6 and v7	C4520821	disease	Neoplasms; Skin and Connective Tissue Diseases	Neoplastic Process	41	8	0.01		1	1	0	2006	2006
CXCL10	3627	Anemia	C0002871	disease	Hemic and Lymphatic Diseases	Disease or Syndrome	847	94	0.01		1	1	0	2016	2016
CXCL10	3627	Childhood Neuroblastoma	C4086165	disease	Neoplasms	Neoplastic Process	2420	231	0.01		1	1	0	2017	2017
CXCL10	3627	Non-ST Elevated Myocardial Infarction	C4255010	disease	Pathological Conditions, Signs and Symptoms; Cardiovascular Diseases	Disease or Syndrome	85	2	0.01		1	1	0	2018	2018
CXCL10	3627	Amyotrophic Lateral Sclerosis	C0002736	disease	Nutritional and Metabolic Diseases; Nervous System Diseases	Disease or Syndrome	1114	485	0.01		1	1	0	2013	2013
CXCL10	3627	Amyloidosis	C0002726	disease	Nutritional and Metabolic Diseases	Disease or Syndrome	694	93	0.01		1	1	0	2017	2017
CXCL10	3627	Alcohol Use Disorder	C0001956	disease	Chemically-Induced Disorders; Mental Disorders	Mental or Behavioral Dysfunction	218	54	0.01		1	1	0	2018	2018
CXCL10	3627	HIV-associated neurocognitive disorder	C4285693	disease	Infections; Immune System Diseases	Disease or Syndrome	61	5	0.01		1	1	0	2019	2019
CXCL10	3627	Immune-mediated hepatitis	C4324396	disease		Disease or Syndrome	15	0	0.01		1	1	0	2018	2018
CXCL10	3627	HIV Coinfection	C4505456	disease	Infections; Immune System Diseases	Disease or Syndrome	129	3	0.01		1	1	0	2017	2017
CXCL10	3627	Childhood Ataxia with Central Nervous System Hypomyelinization	C1858991	disease	Nervous System Diseases	Disease or Syndrome	59	63	0.01		1	1	0	2019	2019
CXCL10	3627	Somatotrophinoma, Familial	C3489630	disease	Neoplasms; Nervous System Diseases; Endocrine System Diseases	Neoplastic Process	18	0	0.01		1	1	0	2018	2018
CXCL10	3627	Febrile Convulsions	C0009952	disease	Pathological Conditions, Signs and Symptoms; Nervous System Diseases	Disease or Syndrome	192	65	0.01		1	1	0	2018	2018
CXCL10	3627	Arthritis, Bacterial	C1692886	group	Infections; Musculoskeletal Diseases	Disease or Syndrome	34	0	0.01		1	1	0	2003	2003
CXCL10	3627	BK virus nephropathy	C1697878	disease	Infections	Disease or Syndrome	12	0	0.01		1	1	0	2018	2018
CXCL10	3627	HCV coinfection	C1698259	disease		Disease or Syndrome	37	5	0.01		1	1	0	2008	2008
CXCL10	3627	Malignant tumor of cervix	C0007847	disease	Neoplasms; Female Urogenital Diseases and Pregnancy Complications	Neoplastic Process	1718	245	0.01		1	1	0	2009	2009
CXCL10	3627	Cerebral Infarction	C0007785	disease	Pathological Conditions, Signs and Symptoms; Nervous System Diseases; Cardiovascular Diseases	Disease or Syndrome	687	123	0.01		1	1	0	2019	2019
CXCL10	3627	CNS disorder	C0007682	group	Nervous System Diseases	Disease or Syndrome	319	11	0.01		1	1	0	2018	2018
CXCL10	3627	Cardiovascular Diseases	C0007222	group	Cardiovascular Diseases	Disease or Syndrome	1756	711	0.01		1	1	0	2014	2014
CXCL10	3627	Laryngeal cleft	C1840311	disease	Congenital, Hereditary, and Neonatal Diseases and Abnormalities	Congenital Abnormality	72	4	0.01		1	1	0	2009	2009
CXCL10	3627	PIGMENTARY DISORDER, RETICULATE, WITH SYSTEMIC MANIFESTATIONS	C1845050	disease	Pathological Conditions, Signs and Symptoms; Congenital, Hereditary, and Neonatal Diseases and Abnormalities; Nutritional and Metabolic Diseases; Skin and Connective Tissue Diseases	Disease or Syndrome	209	37	0.01		0	1	0	2017	2017
CXCL10	3627	Uterine Cervical Neoplasm	C0007873	disease	Neoplasms; Female Urogenital Diseases and Pregnancy Complications	Neoplastic Process	140	72	0.01		1	1	0	2007	2007
CXCL10	3627	Chagas Cardiomyopathy	C0007930	disease	Infections; Cardiovascular Diseases	Disease or Syndrome	37	8	0.01		1	1	0	2012	2012
CXCL10	3627	Chorea	C0008489	phenotype	Pathological Conditions, Signs and Symptoms; Nervous System Diseases	Disease or Syndrome	168	20	0.01		1	1	0	2004	2004
CXCL10	3627	Constitutional Symptom	C0009812	phenotype		Sign or Symptom	30	1	0.01		1	1	0	2011	2011
CXCL10	3627	Condylomata Acuminata	C0009663	disease	Infections; Skin and Connective Tissue Diseases	Disease or Syndrome	73	0	0.01		1	1	0	2009	2009
CXCL10	3627	Leukemia, Large Granular Lymphocytic	C1522378	disease	Neoplasms; Immune System Diseases; Hemic and Lymphatic Diseases	Neoplastic Process	78	0	0.01		1	1	0	2007	2007
CXCL10	3627	Common Cold	C0009443	disease	Infections; Respiratory Tract Diseases	Disease or Syndrome	24	0	0.01		1	1	0	2005	2005
CXCL10	3627	Pneumocystis jiroveci pneumonia	C1535939	disease	Infections; Respiratory Tract Diseases	Disease or Syndrome	180	5	0.01		1	1	0	2006	2006
CXCL10	3627	Leprosy, Multibacillary	C1562585	disease	Infections	Disease or Syndrome	34	16	0.01		1	1	0	2015	2015
CXCL10	3627	Leprosy, Paucibacillary	C1562908	disease	Infections	Disease or Syndrome	31	2	0.01		1	1	0	2015	2015
CXCL10	3627	Systemic immune activation	C4049273	disease		Disease or Syndrome	23	0	0.01		1	1	0	2019	2019
CXCL10	3627	Immune Reconstitution Inflammatory Syndrome	C1619738	disease	Immune System Diseases	Disease or Syndrome	33	5	0.01		1	1	0	2011	2011
CXCL10	3627	Malignant neoplasm of thyroid	C0007115	disease	Neoplasms; Endocrine System Diseases	Neoplastic Process	949	103	0.01		1	1	0	2019	2019
CXCL10	3627	Malignant neoplasm of skin	C0007114	disease	Neoplasms; Skin and Connective Tissue Diseases	Neoplastic Process	508	38	0.01		1	1	0	2002	2002
CXCL10	3627	MYELOPROLIFERATIVE DISORDER, CHRONIC, WITH EOSINOPHILIA	C1851585	disease	Hemic and Lymphatic Diseases	Disease or Syndrome	119	5	0.01		1	1	0	2019	2019
CXCL10	3627	Fibrosis of pleura	C2720436	disease	Infections; Respiratory Tract Diseases	Disease or Syndrome	19	0	0.01		1	1	0	2018	2018
CXCL10	3627	Complicated malaria	C2747816	disease	Infections	Disease or Syndrome	166	38	0.01		1	1	0	2015	2015
CXCL10	3627	Somnolence	C2830004	phenotype	Pathological Conditions, Signs and Symptoms	Mental or Behavioral Dysfunction	87	8	0.01		1	1	0	2009	2009
CXCL10	3627	Bone Marrow failure syndromes	C2931245	disease		Disease or Syndrome	41	0	0.01		1	1	0	2013	2013
CXCL10	3627	Secondary Neoplasm	C2939419	group	Pathological Conditions, Signs and Symptoms; Neoplasms	Neoplastic Process	2492	85	0.01		1	1	0	2010	2010
CXCL10	3627	Immune reconstitution inflammatory syndrome [IRIS]	C2976853	disease		Disease or Syndrome	33	1	0.01		1	1	0	2017	2017
CXCL10	3627	Barrett Esophagus	C0004763	disease	Digestive System Diseases; Neoplasms	Disease or Syndrome	478	60	0.01		1	1	0	2019	2019
CXCL10	3627	Bacterial Infections	C0004623	group	Infections	Disease or Syndrome	616	17	0.01		1	1	0	2018	2018
CXCL10	3627	Infection - suppurative	C3249881	group	Pathological Conditions, Signs and Symptoms; Infections	Disease or Syndrome	20	0	0.01		1	1	0	2015	2015
CXCL10	3627	Biliary Atresia	C0005411	disease	Congenital, Hereditary, and Neonatal Diseases and Abnormalities; Digestive System Diseases	Congenital Abnormality	184	32	0.01		1	1	0	2001	2001
CXCL10	3627	Chronic thromboembolic pulmonary hypertension	C2363973	disease	Respiratory Tract Diseases; Cardiovascular Diseases	Disease or Syndrome	76	4	0.01		1	1	0	2012	2012
CXCL10	3627	Exacerbation of idiopathic pulmonary fibrosis	C2242482	disease		Disease or Syndrome	12	0	0.01		1	1	0	2019	2019
CXCL10	3627	Carcinoma	C0007097	group	Neoplasms	Neoplastic Process	2462	103	0.01		1	1	0	2005	2005
CXCL10	3627	Trichohepatoenteric Syndrome	C1857276	disease	Pathological Conditions, Signs and Symptoms; Congenital, Hereditary, and Neonatal Diseases and Abnormalities; Female Urogenital Diseases and Pregnancy Complications; Skin and Connective Tissue Diseases	Disease or Syndrome	424	28	0.01		1	1	0	2009	2009
CXCL10	3627	Secondary malignant neoplasm of bone	C0153690	disease	Pathological Conditions, Signs and Symptoms; Neoplasms; Musculoskeletal Diseases	Neoplastic Process	647	18	0.01		1	1	0	2017	2017
CXCL10	3627	Capillaritis	C0006902	disease	Pathological Conditions, Signs and Symptoms; Hemic and Lymphatic Diseases; Cardiovascular Diseases	Disease or Syndrome	3	0	0.01		1	1	0	2018	2018
CXCL10	3627	SVEINSSON CHORIORETINAL ATROPHY	C1862382	disease	Congenital, Hereditary, and Neonatal Diseases and Abnormalities; Eye Diseases	Disease or Syndrome	139	30	0.01		1	1	0	2020	2020
CXCL10	3627	Cutaneous Candidiasis	C0006846	disease	Infections; Skin and Connective Tissue Diseases	Disease or Syndrome	9	2	0.01		1	1	0	2008	2008
CXCL10	3627	Precursor Cell Lymphoblastic Leukemia Lymphoma	C1961102	disease	Neoplasms; Immune System Diseases; Hemic and Lymphatic Diseases	Neoplastic Process	879	168	0.01		1	1	0	2012	2012
CXCL10	3627	Blood Coagulation Disorders	C0005779	group	Hemic and Lymphatic Diseases	Disease or Syndrome	267	31	0.01		1	1	0	2018	2018
CXCL10	3627	Autoimmune Primary Adrenal Insufficiency	C2103602	disease	Immune System Diseases; Endocrine System Diseases	Disease or Syndrome	41	18	0.01		1	1	0	2015	2015
CXCL10	3627	MYELODYSPLASTIC SYNDROME	C3463824	group	Hemic and Lymphatic Diseases	Neoplastic Process	1033	95	0.01		1	1	0	2013	2013
CXCL10	3627	Vitamin D Deficiency	C0042870	disease	Nutritional and Metabolic Diseases	Disease or Syndrome	153	37	0.01		1	1	0	2017	2017
CXCL10	3627	Acute appendicitis NOS (disorder)	C0085693	disease	Digestive System Diseases; Infections	Disease or Syndrome	43	2	0.01		1	1	0	2019	2019
CXCL10	3627	Polyglandular Type I Autoimmune Syndrome	C0085859	disease	Immune System Diseases; Endocrine System Diseases	Disease or Syndrome	64	76	0.01		1	1	0	2008	2008
CXCL10	3627	Depressive Symptoms	C0086132	phenotype	Behavior and Behavior Mechanisms	Sign or Symptom	421	120	0.01		1	1	0	2019	2019
CXCL10	3627	Multiple Endocrine Neoplasia Type 1	C0025267	disease	Congenital, Hereditary, and Neonatal Diseases and Abnormalities; Neoplasms; Endocrine System Diseases	Neoplastic Process	145	156	0.01		1	1	0	2017	2017
CXCL10	3627	Marijuana Abuse	C0024809	disease	Chemically-Induced Disorders; Mental Disorders	Mental or Behavioral Dysfunction	156	23	0.01		1	1	0	2018	2018
CXCL10	3627	Paroxysmal nocturnal hemoglobinuria	C0024790	disease	Hemic and Lymphatic Diseases	Disease or Syndrome	132	12	0.01		1	1	0	2013	2013
CXCL10	3627	Lower respiratory tract infection	C0149725	group	Infections; Respiratory Tract Diseases	Disease or Syndrome	63	7	0.01		1	1	0	2018	2018
CXCL10	3627	Chronic pain	C0150055	phenotype	Pathological Conditions, Signs and Symptoms	Sign or Symptom	207	19	0.01		1	1	0	2019	2019
CXCL10	3627	Sensory neuropathy	C0151313	disease	Pathological Conditions, Signs and Symptoms; Nervous System Diseases	Disease or Syndrome	116	15	0.01		1	1	0	2011	2011
CXCL10	3627	Mansonelliasis	C0024759	disease	Infections	Disease or Syndrome	10	0	0.01		1	1	0	2019	2019
CXCL10	3627	Polymyositis	C0085655	disease	Musculoskeletal Diseases; Nervous System Diseases	Disease or Syndrome	183	22	0.01		1	1	0	2017	2017
CXCL10	3627	Meningitis, Cryptococcal	C0085436	disease	Infections; Nervous System Diseases	Disease or Syndrome	31	3	0.01		1	1	0	2017	2017
CXCL10	3627	Microcephaly	C0025958	disease	Congenital, Hereditary, and Neonatal Diseases and Abnormalities; Musculoskeletal Diseases; Nervous System Diseases	Congenital Abnormality	1064	27	0.01		1	1	0	2019	2019
CXCL10	3627	Wheezing	C0043144	phenotype	Pathological Conditions, Signs and Symptoms	Sign or Symptom	132	54	0.01		1	1	0	2011	2011
CXCL10	3627	Xanthomatosis	C0043325	disease	Nutritional and Metabolic Diseases	Disease or Syndrome	20	10	0.01		1	1	0	1998	1998
CXCL10	3627	Diffuse Large B-Cell Lymphoma	C0079744	disease	Neoplasms; Immune System Diseases; Hemic and Lymphatic Diseases	Neoplastic Process	1043	127	0.01		1	1	0	2017	2017
CXCL10	3627	T-Cell Lymphoma	C0079772	disease	Neoplasms; Immune System Diseases; Hemic and Lymphatic Diseases	Neoplastic Process	485	24	0.01		1	1	0	2019	2019
CXCL10	3627	Mesothelioma	C0025500	disease	Neoplasms	Neoplastic Process	560	4	0.01		1	1	0	2010	2010
CXCL10	3627	Meningococcal Infections	C0025303	group	Infections	Disease or Syndrome	69	32	0.01		1	1	0	2008	2008
CXCL10	3627	Gestational Diabetes	C0085207	phenotype	Nutritional and Metabolic Diseases; Female Urogenital Diseases and Pregnancy Complications; Endocrine System Diseases	Disease or Syndrome	649	224	0.01		1	1	0	2019	2019
CXCL10	3627	Antiphospholipid Syndrome	C0085278	disease	Immune System Diseases	Disease or Syndrome	99	17	0.01		1	1	0	2018	2018
CXCL10	3627	Polycystic Kidney, Autosomal Dominant	C0085413	disease	Congenital, Hereditary, and Neonatal Diseases and Abnormalities; Female Urogenital Diseases and Pregnancy Complications; Male Urogenital Diseases	Disease or Syndrome	280	35	0.01		1	1	0	2018	2018
CXCL10	3627	Secondary Sjögren's syndrome	C0151450	disease	Eye Diseases; Skin and Connective Tissue Diseases; Musculoskeletal Diseases; Immune System Diseases; Stomatognathic Diseases	Disease or Syndrome	20	0	0.01		1	1	0	2019	2019
CXCL10	3627	Malaria	C0024530	disease	Infections	Disease or Syndrome	685	148	0.01		1	1	0	2018	2018
CXCL10	3627	Autoimmune thyroid disease	C0178468	disease	Immune System Diseases; Endocrine System Diseases	Disease or Syndrome	107	15	0.01		1	1	0	2003	2003
CXCL10	3627	Liver neoplasms	C0023903	group	Digestive System Diseases; Neoplasms	Neoplastic Process	1424	7	0.01		1	1	0	1999	1999
CXCL10	3627	Lichen Sclerosus et Atrophicus	C0023652	disease	Skin and Connective Tissue Diseases	Disease or Syndrome	64	2	0.01		1	1	0	2007	2007
CXCL10	3627	Scab	C0205204	disease		Acquired Abnormality	24	0	0.01		1	1	0	2018	2018
CXCL10	3627	Carcinomatosis	C0205699	phenotype	Neoplasms	Neoplastic Process	186	2	0.01		1	1	0	2012	2012
CXCL10	3627	Leukoencephalopathy, Progressive Multifocal	C0023524	disease	Infections; Nervous System Diseases	Disease or Syndrome	240	4	0.01		1	1	0	2011	2011
CXCL10	3627	CREST Syndrome	C0206138	disease	Digestive System Diseases; Nutritional and Metabolic Diseases; Skin and Connective Tissue Diseases; Cardiovascular Diseases	Disease or Syndrome	59	6	0.01		1	1	0	2018	2018
CXCL10	3627	Myeloid Leukemia, Chronic	C0023473	disease	Neoplasms; Hemic and Lymphatic Diseases	Neoplastic Process	1172	115	0.01		1	1	0	2017	2017
CXCL10	3627	Adrenocortical carcinoma	C0206686	disease	Neoplasms; Endocrine System Diseases	Neoplastic Process	281	46	0.01		1	1	0	2013	2013
CXCL10	3627	Acute lymphocytic leukemia	C0023449	disease	Neoplasms; Immune System Diseases; Hemic and Lymphatic Diseases	Neoplastic Process	1293	222	0.01		1	1	0	2012	2012
CXCL10	3627	Cicatrix, Hypertrophic	C0162810	disease	Pathological Conditions, Signs and Symptoms	Acquired Abnormality	185	3	0.01		1	1	0	2020	2020
CXCL10	3627	Streptococcal pneumonia	C0155862	disease	Infections; Respiratory Tract Diseases	Disease or Syndrome	100	2	0.01		1	1	0	2018	2018
CXCL10	3627	Hypocholesterolemia	C0151718	disease	Nutritional and Metabolic Diseases	Disease or Syndrome	113	22	0.01		1	1	0	2013	2013
CXCL10	3627	Coronary Occlusion	C0151814	disease	Cardiovascular Diseases	Disease or Syndrome	28	1	0.01		1	1	0	2017	2017
CXCL10	3627	Pleocytosis	C0151857	disease	Pathological Conditions, Signs and Symptoms; Hemic and Lymphatic Diseases	Disease or Syndrome	31	0	0.01		1	1	0	2019	2019
CXCL10	3627	Adenocarcinoma of lung (disorder)	C0152013	disease	Neoplasms	Neoplastic Process	2438	563	0.01		1	1	0	2019	2019
CXCL10	3627	Nodular Sclerosis Classical Hodgkin Lymphoma	C0152268	disease	Neoplasms; Immune System Diseases; Hemic and Lymphatic Diseases	Neoplastic Process	66	22	0.01		1	1	0	1999	1999
CXCL10	3627	Non-arthropod borne lymphocytic choriomeningitis	C0153014	disease	Infections; Nervous System Diseases	Disease or Syndrome	133	0	0.01		1	1	0	2017	2017
CXCL10	3627	Secondary malignant neoplasm of lung	C0153676	disease	Neoplasms; Respiratory Tract Diseases	Neoplastic Process	1370	20	0.01		1	1	0	2018	2018
CXCL10	3627	Lymphadenitis	C0024205	disease	Hemic and Lymphatic Diseases	Disease or Syndrome	55	2	0.01		1	1	0	2015	2015
CXCL10	3627	Stage 0 Breast Carcinoma	C0154084	disease	Neoplasms; Skin and Connective Tissue Diseases	Neoplastic Process	33	8	0.01		1	1	0	2006	2006
CXCL10	3627	Acute angle-closure glaucoma	C0154946	disease	Pathological Conditions, Signs and Symptoms; Eye Diseases; Nervous System Diseases	Disease or Syndrome	14	1	0.01		1	1	0	2017	2017
CXCL10	3627	Chronic Lymphocytic Leukemia	C0023434	disease	Neoplasms; Immune System Diseases; Hemic and Lymphatic Diseases	Neoplastic Process	1447	291	0.01		1	1	0	1999	1999
CXCL10	3627	Mumps	C0026780	disease	Infections; Stomatognathic Diseases	Disease or Syndrome	21	0	0.01		1	1	0	2017	2017
CXCL10	3627	Prostatic Neoplasms	C0033578	group	Neoplasms; Male Urogenital Diseases	Neoplastic Process	1722	31	0.01		1	1	0	2006	2006
CXCL10	3627	Rheumatic Fever	C0035436	disease	Infections; Musculoskeletal Diseases	Disease or Syndrome	94	5	0.01		1	1	0	2018	2018
CXCL10	3627	Bullous pemphigoid	C0030805	disease	Skin and Connective Tissue Diseases; Immune System Diseases	Disease or Syndrome	127	11	0.01		1	1	0	2017	2017
CXCL10	3627	Sarcoidosis, Pulmonary	C0036205	disease	Respiratory Tract Diseases; Hemic and Lymphatic Diseases	Disease or Syndrome	81	1	0.01		1	1	0	2006	2006
CXCL10	3627	Kaposi Sarcoma	C0036220	disease	Neoplasms; Infections	Neoplastic Process	488	15	0.01		1	1	0	2017	2017
CXCL10	3627	Tropical Spastic Paraparesis	C0030481	disease	Infections; Nervous System Diseases	Disease or Syndrome	88	4	0.01		1	1	0	2019	2019
CXCL10	3627	Seizures	C0036572	phenotype	Pathological Conditions, Signs and Symptoms; Nervous System Diseases	Sign or Symptom	2152	553	0.01		1	1	0	2013	2013
CXCL10	3627	Papillon-Lefevre Disease	C0030360	disease	Congenital, Hereditary, and Neonatal Diseases and Abnormalities; Skin and Connective Tissue Diseases	Disease or Syndrome	29	19	0.01		0	1	0	2012	2012
CXCL10	3627	Sexually Transmitted Diseases	C0036916	group	Female Urogenital Diseases and Pregnancy Complications; Infections; Male Urogenital Diseases	Disease or Syndrome	75	3	0.01		1	1	0	2016	2016
CXCL10	3627	Sezary Syndrome	C0036920	disease	Neoplasms; Immune System Diseases; Hemic and Lymphatic Diseases	Neoplastic Process	196	7	0.01		1	1	0	2012	2012
CXCL10	3627	Signs and Symptoms, Respiratory	C0037090	group	Pathological Conditions, Signs and Symptoms	Sign or Symptom	73	10	0.01		1	1	0	2020	2020
CXCL10	3627	Rheumatism	C0035435	disease	Skin and Connective Tissue Diseases; Musculoskeletal Diseases	Disease or Syndrome	197	19	0.01		1	1	0	2017	2017
CXCL10	3627	Retroviridae Infections	C0035369	group	Infections	Disease or Syndrome	112	1	0.01		1	1	0	2005	2005
CXCL10	3627	Pre-Eclampsia	C0032914	phenotype	Female Urogenital Diseases and Pregnancy Complications	Pathologic Function	166	14	0.01		1	1	0	2007	2007
CXCL10	3627	Polycystic Ovary Syndrome	C0032460	disease	Neoplasms; Female Urogenital Diseases and Pregnancy Complications; Endocrine System Diseases	Disease or Syndrome	988	363	0.01		0	1	0	2017	2017
CXCL10	3627	Pulpitis	C0034103	disease	Stomatognathic Diseases	Disease or Syndrome	47	0	0.01		1	1	0	2007	2007
CXCL10	3627	Henoch-Schoenlein Purpura	C0034152	disease	Pathological Conditions, Signs and Symptoms; Immune System Diseases; Hemic and Lymphatic Diseases; Cardiovascular Diseases	Disease or Syndrome	198	59	0.01		1	1	0	2013	2013
CXCL10	3627	Q Fever	C0034362	disease	Infections	Disease or Syndrome	26	0	0.01		1	1	0	2018	2018
CXCL10	3627	Rabies (disorder)	C0034494	disease	Infections	Disease or Syndrome	123	0	0.01		1	1	0	2005	2005
CXCL10	3627	Lobar Pneumonia	C0032300	disease	Infections; Respiratory Tract Diseases	Disease or Syndrome	140	2	0.01		1	1	0	2018	2018
CXCL10	3627	Pneumococcal Infections	C0032269	group	Infections	Disease or Syndrome	85	1	0.01		1	1	0	2020	2020
CXCL10	3627	Pleural effusion disorder	C0032227	group	Respiratory Tract Diseases	Disease or Syndrome	227	14	0.01		1	1	0	2019	2019
CXCL10	3627	Aggressive Periodontitis	C0031106	disease	Stomatognathic Diseases	Disease or Syndrome	184	59	0.01		1	1	0	2003	2003
CXCL10	3627	Silicosis	C0037116	disease	Respiratory Tract Diseases; Occupational Diseases	Disease or Syndrome	121	7	0.01		1	1	0	2018	2018
CXCL10	3627	Osteosarcoma	C0029463	disease	Neoplasms	Neoplastic Process	2283	178	0.01		1	1	0	2017	2017
CXCL10	3627	neurofibroma	C0027830	disease	Neoplasms; Nervous System Diseases	Neoplastic Process	125	5	0.01		1	1	0	2019	2019
CXCL10	3627	Neuroblastoma	C0027819	disease	Neoplasms	Neoplastic Process	2509	386	0.01		1	1	0	2017	2017
CXCL10	3627	African Trypanosomiasis	C0041228	disease	Infections	Disease or Syndrome	55	2	0.01		1	1	0	2009	2009
CXCL10	3627	nervous system disorder	C0027765	group	Nervous System Diseases	Disease or Syndrome	977	39	0.01		1	1	0	2004	2004
CXCL10	3627	Tuberculosis, Meningeal	C0041318	disease	Infections; Nervous System Diseases	Disease or Syndrome	68	10	0.01		1	1	0	2019	2019
CXCL10	3627	Pleural Tuberculosis	C0041326	disease	Infections; Respiratory Tract Diseases	Disease or Syndrome	59	0	0.01		1	1	0	2017	2017
CXCL10	3627	Nephritis	C0027697	disease	Female Urogenital Diseases and Pregnancy Complications; Male Urogenital Diseases	Disease or Syndrome	296	40	0.01		1	1	0	2012	2012
CXCL10	3627	Urinary tract infection	C0042029	group	Female Urogenital Diseases and Pregnancy Complications; Infections; Male Urogenital Diseases	Disease or Syndrome	219	14	0.01		1	1	0	2016	2016
CXCL10	3627	Mycobacterium avium-intracellulare Infection	C0026916	disease	Infections	Disease or Syndrome	58	5	0.01		1	1	0	2019	2019
CXCL10	3627	Vascular Diseases	C0042373	group	Cardiovascular Diseases	Disease or Syndrome	688	40	0.01		1	1	0	2013	2013
CXCL10	3627	Thyroid Diseases	C0040128	group	Endocrine System Diseases	Disease or Syndrome	230	26	0.01		1	1	0	2001	2001
CXCL10	3627	Thrombocytopenia	C0040034	phenotype	Hemic and Lymphatic Diseases	Disease or Syndrome	592	110	0.01		1	1	0	2011	2011
CXCL10	3627	Neurosyphilis	C0027927	disease	Infections; Nervous System Diseases	Disease or Syndrome	19	0	0.01		1	1	0	2017	2017
CXCL10	3627	Skin lesion	C0037284	group	Skin and Connective Tissue Diseases	Disease or Syndrome	563	52	0.01		1	1	0	2017	2017
CXCL10	3627	Neurofibromatosis 1	C0027831	disease	Congenital, Hereditary, and Neonatal Diseases and Abnormalities; Neoplasms; Nervous System Diseases	Neoplastic Process	311	827	0.01		1	1	0	2019	2019
CXCL10	3627	Subarachnoid Hemorrhage	C0038525	disease	Pathological Conditions, Signs and Symptoms; Nervous System Diseases; Cardiovascular Diseases	Disease or Syndrome	501	26	0.01		1	1	0	2016	2016
CXCL10	3627	Synovitis	C0039103	disease	Musculoskeletal Diseases	Disease or Syndrome	197	0	0.01		1	1	0	2007	2007
CXCL10	3627	Syphilis	C0039128	disease	Female Urogenital Diseases and Pregnancy Complications; Infections; Male Urogenital Diseases	Disease or Syndrome	80	3	0.01		1	1	0	2017	2017
CXCL10	3627	Syphilis, Latent	C0039133	disease	Infections	Disease or Syndrome	3	0	0.01		1	1	0	2017	2017
CXCL10	3627	Takayasu Arteritis	C0039263	disease	Skin and Connective Tissue Diseases; Cardiovascular Diseases	Disease or Syndrome	136	55	0.01		1	1	0	2019	2019
CXCL10	3627	Giant Cell Arteritis	C0039483	disease	Skin and Connective Tissue Diseases; Immune System Diseases; Nervous System Diseases; Cardiovascular Diseases	Disease or Syndrome	260	78	0.01		1	1	0	2019	2019
CXCL10	3627	Thromboangiitis Obliterans	C0040021	disease	Cardiovascular Diseases	Disease or Syndrome	127	16	0.01		1	1	0	2014	2014
CXCL10	3627	Viral hepatitis	C0042721	group	Digestive System Diseases; Infections	Disease or Syndrome	79	5	0.01		1	1	0	2013	2013
CXCL10	3627	Anastomosis	C0332853	disease		Acquired Abnormality	155	2	0.01		1	1	0	2014	2014
CXCL10	3627	Capillary Leak Syndrome	C0343084	disease	Cardiovascular Diseases	Disease or Syndrome	18	0	0.01		1	1	0	2015	2015
CXCL10	3627	Helicobacter-associated gastritis	C0343378	disease	Digestive System Diseases; Infections	Disease or Syndrome	30	0	0.01		1	1	0	2000	2000
CXCL10	3627	Clostridium difficile infection	C0343386	disease	Infections	Disease or Syndrome	57	10	0.01		1	1	0	2019	2019
CXCL10	3627	Human papilloma virus infection	C0343641	disease	Infections	Disease or Syndrome	429	42	0.01		1	1	0	2017	2017
CXCL10	3627	Acute HIV infection	C0343752	disease	Infections; Immune System Diseases	Disease or Syndrome	48	0	0.01		1	1	0	2017	2017
CXCL10	3627	Malignant mesothelioma	C0345967	disease	Neoplasms; Respiratory Tract Diseases	Neoplastic Process	420	12	0.01		1	1	0	2011	2011
CXCL10	3627	Breast Cancer, Familial	C0346153	disease	Neoplasms; Skin and Connective Tissue Diseases	Neoplastic Process	183	91	0.01		1	1	0	2013	2013
CXCL10	3627	Headache	C0018681	phenotype	Pathological Conditions, Signs and Symptoms	Sign or Symptom	338	75	0.01		1	1	0	2018	2018
CXCL10	3627	Asthma attack	C0347950	disease	Respiratory Tract Diseases; Immune System Diseases	Disease or Syndrome	32	1	0.01		0	1	0	2017	2017
CXCL10	3627	Squamous cell carcinoma of tongue	C0349566	disease	Neoplasms; Stomatognathic Diseases	Neoplastic Process	462	2	0.01		1	1	0	2017	2017
CXCL10	3627	X-linked Adrenal Hypoplasia	C0342482	disease	Endocrine System Diseases	Disease or Syndrome	57	70	0.01		1	1	0	2012	2012
CXCL10	3627	Complications of Diabetes Mellitus	C0342257	group	Endocrine System Diseases	Disease or Syndrome	240	35	0.01		1	1	0	2017	2017
CXCL10	3627	Superficial ulcer	C0333307	disease	Pathological Conditions, Signs and Symptoms	Acquired Abnormality	242	10	0.01		1	1	0	2011	2011
CXCL10	3627	Tumor necrosis	C0333516	phenotype	Pathological Conditions, Signs and Symptoms	Neoplastic Process	350	1	0.01		1	1	0	2018	2018
CXCL10	3627	Caries (morphologic abnormality)	C0333519	disease	Pathological Conditions, Signs and Symptoms	Disease or Syndrome	106	33	0.01		1	1	0	2007	2007
CXCL10	3627	Lymphoid hyperplasia	C0333997	disease	Pathological Conditions, Signs and Symptoms; Hemic and Lymphatic Diseases	Disease or Syndrome	39	0	0.01		0	1	0	1999	1999
CXCL10	3627	Heart Block	C0018794	disease	Pathological Conditions, Signs and Symptoms; Cardiovascular Diseases	Disease or Syndrome	58	7	0.01		1	1	0	2019	2019
CXCL10	3627	Retinal Vein Occlusion	C0035328	disease	Eye Diseases; Cardiovascular Diseases	Disease or Syndrome	76	15	0.01		1	1	0	2019	2019
CXCL10	3627	Acute respiratory infections	C0339901	group	Infections; Respiratory Tract Diseases	Disease or Syndrome	35	0	0.01		1	1	0	2017	2017
CXCL10	3627	Acute exacerbation of chronic obstructive airways disease	C0340044	phenotype	Respiratory Tract Diseases	Disease or Syndrome	63	1	0.01		1	1	0	2018	2018
CXCL10	3627	Stable angina	C0340288	disease	Pathological Conditions, Signs and Symptoms; Cardiovascular Diseases	Disease or Syndrome	144	8	0.01		1	1	0	2001	2001
CXCL10	3627	Multinodular goiter	C0342208	disease	Neoplasms; Endocrine System Diseases	Disease or Syndrome	51	6	0.01		1	1	0	2003	2003
CXCL10	3627	Hay fever	C0018621	disease	Respiratory Tract Diseases; Immune System Diseases; Otorhinolaryngologic Diseases	Disease or Syndrome	114	42	0.01		1	1	0	2005	2005
CXCL10	3627	Guillain-Barre Syndrome	C0018378	disease	Immune System Diseases; Nervous System Diseases	Disease or Syndrome	163	13	0.01		1	1	0	2018	2018
CXCL10	3627	Halo nevus	C0474824	disease	Neoplasms	Neoplastic Process	13	2	0.01		1	1	0	2017	2017
CXCL10	3627	Neonatal hyperglycemia	C0475718	disease	Nutritional and Metabolic Diseases	Disease or Syndrome	2	0	0.01		1	1	0	2018	2018
CXCL10	3627	Secondary malignant neoplasm of liver	C0494165	disease	Digestive System Diseases; Neoplasms	Neoplastic Process	951	34	0.01		1	1	0	2019	2019
CXCL10	3627	Dementia	C0497327	disease	Nervous System Diseases; Mental Disorders	Mental or Behavioral Dysfunction	816	176	0.01		1	1	0	2012	2012
CXCL10	3627	Glomerulitis (disorder)	C0017657	disease	Pathological Conditions, Signs and Symptoms; Female Urogenital Diseases and Pregnancy Complications; Male Urogenital Diseases	Disease or Syndrome	8	1	0.01		1	1	0	2018	2018
CXCL10	3627	Gliosis	C0017639	phenotype	Pathological Conditions, Signs and Symptoms	Pathologic Function	102	3	0.01		1	1	0	2006	2006
CXCL10	3627	Gastritis	C0017152	disease	Digestive System Diseases	Disease or Syndrome	292	21	0.01		1	1	0	2013	2013
CXCL10	3627	Gall Bladder Diseases	C0016977	group	Digestive System Diseases	Disease or Syndrome	42	4	0.01		1	1	0	2018	2018
CXCL10	3627	Auricular swelling	C0549297	phenotype	Female Urogenital Diseases and Pregnancy Complications; Male Urogenital Diseases	Sign or Symptom	49	0	0.01		1	1	0	2011	2011
CXCL10	3627	Flushing	C0016382	phenotype	Pathological Conditions, Signs and Symptoms	Sign or Symptom	83	9	0.01		1	1	0	2013	2013
CXCL10	3627	Neuropathy	C0442874	group	Nervous System Diseases	Disease or Syndrome	484	110	0.01		1	1	0	2018	2018
CXCL10	3627	Osteoglophonic dwarfism	C0432283	disease	Congenital, Hereditary, and Neonatal Diseases and Abnormalities; Musculoskeletal Diseases	Congenital Abnormality	100	4	0.01		1	1	0	2019	2019
CXCL10	3627	Hematologic Neoplasms	C0376545	group	Neoplasms; Hemic and Lymphatic Diseases	Neoplastic Process	827	60	0.01		1	1	1	2013	2013
CXCL10	3627	Endotoxemia	C0376618	phenotype	Pathological Conditions, Signs and Symptoms; Infections	Disease or Syndrome	401	5	0.01		1	1	0	2000	2000
CXCL10	3627	Sepsis-Associated Encephalopathy	C0393642	disease	Nervous System Diseases	Disease or Syndrome	57	0	0.01		1	1	0	2020	2020
CXCL10	3627	Polyradiculoneuropathy, Chronic Inflammatory Demyelinating	C0393819	disease	Immune System Diseases; Nervous System Diseases	Disease or Syndrome	82	4	0.01		1	1	0	2016	2016
CXCL10	3627	Multifocal motor neuropathy	C0393847	disease	Immune System Diseases; Nervous System Diseases	Disease or Syndrome	13	0	0.01		1	1	0	2019	2019
CXCL10	3627	Histiocytic Necrotizing Lymphadenitis	C0398367	disease	Hemic and Lymphatic Diseases	Disease or Syndrome	14	0	0.01		1	1	0	2013	2013
CXCL10	3627	Granuloma	C0018188	phenotype	Pathological Conditions, Signs and Symptoms; Hemic and Lymphatic Diseases	Pathologic Function	24	0	0.01		1	1	0	2005	2005
CXCL10	3627	Glycogen storage disease type II	C0017921	disease	Congenital, Hereditary, and Neonatal Diseases and Abnormalities; Nutritional and Metabolic Diseases; Nervous System Diseases	Disease or Syndrome	194	269	0.01		1	1	0	2018	2018
CXCL10	3627	Membranous glomerulonephritis	C0017665	disease	Female Urogenital Diseases and Pregnancy Complications; Male Urogenital Diseases; Immune System Diseases	Disease or Syndrome	197	33	0.01		1	1	0	2012	2012
CXCL10	3627	Muscle damage	C0410158	phenotype		Acquired Abnormality	163	4	0.01		1	1	0	2019	2019
CXCL10	3627	Acute asthma	C0582415	disease	Respiratory Tract Diseases; Immune System Diseases	Disease or Syndrome	30	0	0.01		1	1	0	2017	2017
CXCL10	3627	Fulminant hepatitis	C0302809	disease	Digestive System Diseases	Disease or Syndrome	57	1	0.01		1	1	0	2000	2000
CXCL10	3627	Malignant ascites	C0220656	disease	Pathological Conditions, Signs and Symptoms; Digestive System Diseases; Neoplasms	Neoplastic Process	86	0	0.01		1	1	0	2017	2017
CXCL10	3627	Anaplastic thyroid carcinoma	C0238461	disease	Neoplasms	Neoplastic Process	392	16	0.01		1	1	0	2014	2014
CXCL10	3627	Infection by Leishmania braziliensis	C0023288	disease	Infections; Skin and Connective Tissue Diseases	Disease or Syndrome	22	0	0.01		1	1	0	2010	2010
CXCL10	3627	Congenital Abnormality	C0000768	group	Congenital, Hereditary, and Neonatal Diseases and Abnormalities	Congenital Abnormality	1098	73	0.01		1	1	0	2017	2017
CXCL10	3627	Intestinal Neoplasms	C0021841	group	Digestive System Diseases; Neoplasms	Neoplastic Process	182	2	0.01		1	1	0	2018	2018
CXCL10	3627	Immune System Diseases	C0021053	group	Immune System Diseases	Disease or Syndrome	451	116	0.01		1	1	0	2017	2017
CXCL10	3627	Hypothyroidism	C0020676	disease	Endocrine System Diseases	Disease or Syndrome	613	283	0.01		1	1	0	2014	2014
CXCL10	3627	Hypersplenism	C0020532	disease	Hemic and Lymphatic Diseases	Disease or Syndrome	22	0	0.01		1	1	0	2012	2012
CXCL10	3627	Parasitemia	C0242723	disease	Pathological Conditions, Signs and Symptoms; Infections	Disease or Syndrome	140	3	0.01		1	1	0	2009	2009
CXCL10	3627	Herpesviridae Infections	C0019372	group	Infections	Disease or Syndrome	62	3	0.01		1	1	0	2017	2017
CXCL10	3627	Psoriasis vulgaris	C0263361	disease	Skin and Connective Tissue Diseases	Disease or Syndrome	255	80	0.01		1	1	0	2019	2019
CXCL10	3627	Cytomegalovirus encephalitis	C0238097	disease	Infections; Nervous System Diseases	Disease or Syndrome	8	0	0.01		1	1	0	2005	2005
CXCL10	3627	Leishmaniasis, Visceral	C0023290	disease	Infections	Disease or Syndrome	197	22	0.01		1	1	0	2017	2017
CXCL10	3627	Cartilage-hair hypoplasia	C0220748	disease	Congenital, Hereditary, and Neonatal Diseases and Abnormalities; Digestive System Diseases; Musculoskeletal Diseases; Immune System Diseases	Disease or Syndrome; Congenital Abnormality	49	77	0.01		1	1	0	2019	2019
CXCL10	3627	Congenital hypoplasia of adrenal gland	C0220766	disease	Congenital, Hereditary, and Neonatal Diseases and Abnormalities; Endocrine System Diseases	Congenital Abnormality	45	13	0.01		1	1	0	2012	2012
CXCL10	3627	Borderline leprosy	C0023346	disease	Infections	Disease or Syndrome	5	0	0.01		1	1	0	2015	2015
CXCL10	3627	Mesangial proliferative glomerulonephritis	C0221238	disease	Female Urogenital Diseases and Pregnancy Complications; Male Urogenital Diseases	Disease or Syndrome	37	0	0.01		1	1	0	2017	2017
CXCL10	3627	Inflammatory pain	C0234251	phenotype	Pathological Conditions, Signs and Symptoms	Sign or Symptom	266	1	0.01		1	1	0	2018	2018
CXCL10	3627	Mental deterioration	C0234985	phenotype	Mental Disorders	Mental or Behavioral Dysfunction	508	121	0.01		1	1	0	2018	2018
CXCL10	3627	Peripheral motor neuropathy	C0235025	disease	Nervous System Diseases	Disease or Syndrome	64	20	0.01		1	1	0	2019	2019
CXCL10	3627	Intravascular hemolysis	C0235574	disease	Pathological Conditions, Signs and Symptoms	Disease or Syndrome	36	0	0.01		1	1	0	2018	2018
CXCL10	3627	Proliferative glomerulonephritis	C0235618	disease	Female Urogenital Diseases and Pregnancy Complications; Male Urogenital Diseases	Disease or Syndrome	15	0	0.01		1	1	0	2002	2002
CXCL10	3627	Invasive aspergillosis	C0238013	disease	Infections	Disease or Syndrome	59	13	0.01		1	1	0	2008	2008
CXCL10	3627	Dermatomyositis, Childhood Type	C0263666	disease	Skin and Connective Tissue Diseases; Musculoskeletal Diseases; Nervous System Diseases	Disease or Syndrome	62	1	0.01		1	1	0	2019	2019
CXCL10	3627	Lymphoid interstitial pneumonia	C0264511	disease	Respiratory Tract Diseases	Disease or Syndrome	17	0	0.01		1	1	0	2001	2001
CXCL10	3627	Hepatitis, Chronic	C0019189	disease	Digestive System Diseases	Disease or Syndrome	224	10	0.01		1	1	0	2008	2008
CXCL10	3627	Chronic viral hepatitis	C0276623	disease	Digestive System Diseases	Disease or Syndrome	59	8	0.01		1	1	0	2001	2001
CXCL10	3627	Severe Dengue	C0019100	disease	Infections	Disease or Syndrome	117	25	0.01		1	1	0	2019	2019
CXCL10	3627	Metastatic melanoma	C0278883	disease	Neoplasms	Neoplastic Process	504	42	0.01		1	1	0	2018	2018
CXCL10	3627	Squamous cell carcinoma of esophagus	C0279626	disease	Digestive System Diseases; Neoplasms	Neoplastic Process	2053	329	0.01		1	1	0	2015	2015
CXCL10	3627	Hemangiosarcoma	C0018923	disease	Neoplasms	Neoplastic Process	162	7	0.01		1	1	0	2004	2004
CXCL10	3627	Solid Neoplasm	C0280100	phenotype	Neoplasms	Neoplastic Process	1145	24	0.01		1	1	0	2018	2018
CXCL10	3627	Diffuse Astrocytoma	C0280785	disease	Neoplasms	Neoplastic Process	81	8	0.01		1	1	0	2017	2017
CXCL10	3627	Iron Overload	C0282193	disease	Nutritional and Metabolic Diseases	Disease or Syndrome	241	53	0.01		1	1	0	2019	2019
CXCL10	3627	Leukostasis	C0282548	disease	Hemic and Lymphatic Diseases	Disease or Syndrome	25	0	0.01		1	1	0	2020	2020
CXCL10	3627	Hepatorenal Syndrome	C0019212	disease	Digestive System Diseases; Female Urogenital Diseases and Pregnancy Complications; Male Urogenital Diseases	Disease or Syndrome	25	0	0.01		1	1	0	2019	2019
CXCL10	3627	Acute type A viral hepatitis	C0276434	disease	Digestive System Diseases; Infections	Disease or Syndrome	10	0	0.01		1	1	0	2016	2016
CXCL10	3627	Thickening of pleura	C0264545	disease	Respiratory Tract Diseases	Disease or Syndrome	25	0	0.01		1	1	0	2018	2018
CXCL10	3627	Congenital emphysema	C0265797	disease	Respiratory Tract Diseases	Congenital Abnormality	40	0	0.01		1	1	0	2019	2019
CXCL10	3627	Lysinuric Protein Intolerance	C0268647	disease	Congenital, Hereditary, and Neonatal Diseases and Abnormalities; Nutritional and Metabolic Diseases	Disease or Syndrome	21	47	0.01		1	1	0	2015	2015
CXCL10	3627	Peripheral demyelinating neuropathy	C0270922	disease	Immune System Diseases; Nervous System Diseases	Disease or Syndrome	95	14	0.01		1	1	0	2002	2002
CXCL10	3627	Inflammatory neuropathy	C0270933	disease	Nervous System Diseases	Disease or Syndrome	19	1	0.01		1	1	0	2002	2002
CXCL10	3627	Addison's disease due to autoimmunity	C0271737	disease	Immune System Diseases; Endocrine System Diseases	Disease or Syndrome	44	18	0.01		1	1	0	2015	2015
CXCL10	3627	Acquired aplastic anemia	C0271907	disease	Hemic and Lymphatic Diseases	Disease or Syndrome	64	12	0.01		1	1	0	2017	2017
CXCL10	3627	Herpes Simplex Infections	C0019348	group	Infections; Skin and Connective Tissue Diseases	Disease or Syndrome	645	11	0.01		1	1	0	1993	1993
CXCL10	3627	Primary bacterial peritonitis	C0275551	disease	Digestive System Diseases; Infections	Disease or Syndrome	39	11	0.01		1	1	0	2019	2019
CXCL10	3627	Herpes NOS	C0019340	disease	Infections	Disease or Syndrome	114	5	0.01		1	1	0	2017	2017
CXCL10	3627	Cervix carcinoma	C0302592	disease	Neoplasms; Female Urogenital Diseases and Pregnancy Complications	Neoplastic Process	1881	283	0.01		1	1	0	2009	2009

## Sheet: MMP9
Gene	Gene_id	Disease	Disease_id	Type	Disease_Class	Semantic_Type	N_genes_d	N_SNPs_d	Score_gda	EL_gda	EI_gda	N_PMIDs	N_SNPs_gda	First_Ref	Last_Ref
MMP9	4318	Asthma	C0004096	disease	Respiratory Tract Diseases; Immune System Diseases	Disease or Syndrome	2096	1536	0.6		0.861	36	6	2001	2019
MMP9	4318	Hypertensive disease	C0020538	group	Cardiovascular Diseases	Disease or Syndrome	2322	1085	0.6		1	28	1	2004	2019
MMP9	4318	Chronic Obstructive Airway Disease	C0024117	disease	Respiratory Tract Diseases	Disease or Syndrome	1428	852	0.6		0.979	48	4	2002	2019
MMP9	4318	Myocardial Infarction	C0027051	disease	Pathological Conditions, Signs and Symptoms; Cardiovascular Diseases	Disease or Syndrome	1800	680	0.6		0.98	49	2	1995	2019
MMP9	4318	Neoplasm Metastasis	C0027627	phenotype	Pathological Conditions, Signs and Symptoms; Neoplasms	Neoplastic Process	6385	327	0.6		0.991	450	4	1996	2020
MMP9	4318	Pulmonary Fibrosis	C0034069	disease	Respiratory Tract Diseases	Disease or Syndrome	924	25	0.6		0.923	13	0	2006	2019
MMP9	4318	Aortic Aneurysm, Abdominal	C0162871	disease	Cardiovascular Diseases	Disease or Syndrome	586	90	0.6		0.938	65	4	1995	2020
MMP9	4318	Brain Ischemia	C0007786	disease	Nervous System Diseases; Cardiovascular Diseases	Disease or Syndrome	358	5	0.56		1	8	0	2004	2020
MMP9	4318	Colonic Neoplasms	C0009375	group	Digestive System Diseases; Neoplasms	Neoplastic Process	947	45	0.54		1	7	0	2005	2011
MMP9	4318	Sepsis	C0243026	disease	Pathological Conditions, Signs and Symptoms; Infections	Disease or Syndrome	1453	144	0.54		1	6	0	2001	2018
MMP9	4318	Reperfusion Injury	C0035126	disease	Pathological Conditions, Signs and Symptoms; Cardiovascular Diseases	Injury or Poisoning	300	0	0.51		1	4	0	2004	2013
MMP9	4318	Aortic Aneurysm, Thoracic	C0162872	disease	Cardiovascular Diseases	Disease or Syndrome	41	60	0.51		1	3	0	2005	2018
MMP9	4318	Diabetes Mellitus, Experimental	C0011853	disease	Nutritional and Metabolic Diseases; Endocrine System Diseases	Experimental Model of Disease	522	0	0.5		1	5	0	2006	2013
MMP9	4318	Mammary Neoplasms, Experimental	C0024668	phenotype	Neoplasms	Neoplastic Process; Experimental Model of Disease	218	0	0.5		1	2	0	2009	2011
MMP9	4318	Multiple Organ Failure	C0026766	phenotype	Pathological Conditions, Signs and Symptoms	Pathologic Function	25	0	0.5		1	2	0	2004	2012
MMP9	4318	Gastric ulcer	C0038358	disease	Digestive System Diseases	Disease or Syndrome	136	7	0.5		1	1	0	2007	2007
MMP9	4318	Infarction, Middle Cerebral Artery	C0740392	disease	Pathological Conditions, Signs and Symptoms; Nervous System Diseases; Cardiovascular Diseases	Disease or Syndrome	145	0	0.5		1	2	0	2009	2014
MMP9	4318	Brain Edema	C1527311	phenotype	Nervous System Diseases	Pathologic Function	30	0	0.5		1	2	0	2004	2010
MMP9	4318	Metaphyseal Anadysplasia 2	C2751322	disease	Congenital, Hereditary, and Neonatal Diseases and Abnormalities; Musculoskeletal Diseases	Disease or Syndrome	1	0	0.5	moderate	1	1	0	2009	2009
MMP9	4318	Neointima	C2936380	disease	Pathological Conditions, Signs and Symptoms	Acquired Abnormality	40	0	0.5		1	2	0	2007	2013
MMP9	4318	Aortic Aneurysm	C0003486	disease	Cardiovascular Diseases	Disease or Syndrome	278	19	0.4		1	13	0	1995	2019
MMP9	4318	Astrocytoma	C0004114	disease	Neoplasms	Neoplastic Process	985	59	0.4		0.909	11	0	2000	2018
MMP9	4318	Malignant neoplasm of urinary bladder	C0005684	disease	Neoplasms; Female Urogenital Diseases and Pregnancy Complications; Male Urogenital Diseases	Neoplastic Process	2113	316	0.4		0.968	31	3	1994	2020
MMP9	4318	Bladder Neoplasm	C0005695	disease	Neoplasms; Female Urogenital Diseases and Pregnancy Complications; Male Urogenital Diseases	Neoplastic Process	2130	281	0.4		0.969	32	3	1994	2020
MMP9	4318	Malignant neoplasm of breast	C0006142	disease	Neoplasms; Skin and Connective Tissue Diseases	Neoplastic Process	6941	3417	0.4		1	135	7	1996	2020
MMP9	4318	Malignant tumor of colon	C0007102	disease	Digestive System Diseases; Neoplasms	Neoplastic Process	2969	688	0.4		0.966	29	0	1996	2019
MMP9	4318	Non-Small Cell Lung Carcinoma	C0007131	disease	Neoplasms; Respiratory Tract Diseases	Neoplastic Process	3926	712	0.4		0.964	56	2	2004	2019
MMP9	4318	Squamous cell carcinoma	C0007137	disease	Neoplasms	Neoplastic Process	2507	257	0.4		0.971	35	1	2001	2019
MMP9	4318	Ulcerative Colitis	C0009324	disease	Digestive System Diseases	Disease or Syndrome	1458	827	0.4		1	13	0	2012	2018
MMP9	4318	Glioblastoma	C0017636	disease	Neoplasms	Neoplastic Process	3177	281	0.4		1	45	0	1996	2019
MMP9	4318	Obesity	C0028754	disease	Pathological Conditions, Signs and Symptoms; Nutritional and Metabolic Diseases	Disease or Syndrome	2821	1111	0.4		0.909	11	1	2005	2019
MMP9	4318	Periodontitis	C0031099	disease	Stomatognathic Diseases	Disease or Syndrome	682	116	0.4		0.9	20	0	2004	2020
MMP9	4318	Prostatic Neoplasms	C0033578	group	Neoplasms; Male Urogenital Diseases	Neoplastic Process	1722	31	0.4		1	13	0	2002	2017
MMP9	4318	Pulmonary Emphysema	C0034067	disease	Respiratory Tract Diseases	Disease or Syndrome	352	64	0.4		1	18	0	2001	2019
MMP9	4318	Schizophrenia	C0036341	disease	Mental Disorders	Mental or Behavioral Dysfunction	2872	2897	0.4		1	15	2	2009	2019
MMP9	4318	Malignant neoplasm of pancreas	C0346647	disease	Digestive System Diseases; Neoplasms; Endocrine System Diseases	Neoplastic Process	2667	277	0.4		0.952	21	0	1995	2019
MMP9	4318	Malignant neoplasm of prostate	C0376358	disease	Neoplasms; Male Urogenital Diseases	Neoplastic Process	4502	1082	0.4		0.984	61	1	1998	2020
MMP9	4318	Breast Carcinoma	C0678222	disease	Neoplasms; Skin and Connective Tissue Diseases	Neoplastic Process	6776	2793	0.4		1	136	7	1996	2020
MMP9	4318	Mammary Neoplasms	C1458155	group	Neoplasms; Skin and Connective Tissue Diseases	Neoplastic Process	2780	385	0.4		0.967	30	0	2001	2019
MMP9	4318	Glioblastoma Multiforme	C1621958	disease	Neoplasms	Neoplastic Process	3197	186	0.4		1	44	0	1996	2019
MMP9	4318	Liver carcinoma	C2239176	disease	Digestive System Diseases; Neoplasms	Neoplastic Process	5725	942	0.4		0.964	84	0	1996	2019
MMP9	4318	Acute Coronary Syndrome	C0948089	disease	Cardiovascular Diseases	Disease or Syndrome	440	139	0.39		1	10	0	2005	2018
MMP9	4318	Middle Cerebral Artery Occlusion	C0740391	disease	Pathological Conditions, Signs and Symptoms; Nervous System Diseases; Cardiovascular Diseases	Acquired Abnormality	626	0	0.38		1	9	0	2009	2020
MMP9	4318	Liver diseases	C0023895	group	Digestive System Diseases	Disease or Syndrome	1019	100	0.35		1	6	1	2004	2020
MMP9	4318	Pancreatic Neoplasm	C0030297	disease	Digestive System Diseases; Neoplasms; Endocrine System Diseases	Neoplastic Process	764	20	0.35		1	6	0	2002	2012
MMP9	4318	Stable angina	C0340288	disease	Pathological Conditions, Signs and Symptoms; Cardiovascular Diseases	Disease or Syndrome	144	8	0.35		1	6	1	2002	2018
MMP9	4318	Inflammation	C0021368	phenotype	Pathological Conditions, Signs and Symptoms	Pathologic Function	467	0	0.34		1	6	0	2003	2014
MMP9	4318	Alcoholic Intoxication, Chronic	C0001973	disease	Chemically-Induced Disorders; Mental Disorders	Mental or Behavioral Dysfunction	577	441	0.33		1	5	0	2007	2020
MMP9	4318	Bipolar Disorder	C0005586	disease	Mental Disorders	Mental or Behavioral Dysfunction	1183	839	0.33		0.5	3	0	2009	2014
MMP9	4318	Oral Submucous Fibrosis	C0029172	disease	Stomatognathic Diseases	Disease or Syndrome	106	8	0.33		0.75	4	0	2006	2012
MMP9	4318	Septicemia	C0036690	disease	Pathological Conditions, Signs and Symptoms; Infections	Disease or Syndrome	1285	141	0.33		1	4	0	2001	2018
MMP9	4318	Metaphyseal anadysplasia	C0432226	disease	Congenital, Hereditary, and Neonatal Diseases and Abnormalities; Musculoskeletal Diseases	Disease or Syndrome	2	0	0.33		1	3	0	2009	2017
MMP9	4318	Aortic Rupture	C0003496	disease	Cardiovascular Diseases; Wounds and Injuries	Disease or Syndrome	22	0	0.32		1	3	0	2008	2019
MMP9	4318	Bone neoplasms	C0005967	group	Neoplasms; Musculoskeletal Diseases	Neoplastic Process	151	4	0.32		1	3	0	2005	2008
MMP9	4318	Retinal Diseases	C0035309	group	Eye Diseases	Disease or Syndrome	714	56	0.32		1	3	0	2011	2019
MMP9	4318	Depressive Symptoms	C0086132	phenotype	Behavior and Behavior Mechanisms	Sign or Symptom	421	120	0.32		0.5	2	0	2014	2019
MMP9	4318	Malignant neoplasm of skin	C0007114	disease	Neoplasms; Skin and Connective Tissue Diseases	Neoplastic Process	508	38	0.31		1	2	0	2008	2008
MMP9	4318	Hyperplasia	C0020507	phenotype	Pathological Conditions, Signs and Symptoms	Pathologic Function	131	0	0.31		1	2	0	2005	2005
MMP9	4318	Lupus Nephritis	C0024143	disease	Female Urogenital Diseases and Pregnancy Complications; Skin and Connective Tissue Diseases; Male Urogenital Diseases; Immune System Diseases	Disease or Syndrome	503	64	0.31		1	2	0	2012	2017
MMP9	4318	Marfan Syndrome	C0024796	disease	Congenital, Hereditary, and Neonatal Diseases and Abnormalities; Skin and Connective Tissue Diseases; Musculoskeletal Diseases; Cardiovascular Diseases	Disease or Syndrome	130	1012	0.31		1	2	0	2008	2019
MMP9	4318	Neoplasm Invasiveness	C0027626	phenotype	Pathological Conditions, Signs and Symptoms; Neoplasms	Pathologic Function	193	0	0.31		1	8	0	2003	2014
MMP9	4318	Skin Neoplasms	C0037286	group	Neoplasms; Skin and Connective Tissue Diseases	Neoplastic Process	363	9	0.31		1	2	0	2007	2008
MMP9	4318	Centriacinar Emphysema	C0221227	disease	Respiratory Tract Diseases	Disease or Syndrome	14	3	0.31		1	2	1	2013	2014
MMP9	4318	Anaplastic astrocytoma	C0334579	disease	Neoplasms	Neoplastic Process	202	12	0.31		1	2	0	1996	2010
MMP9	4318	Manic	C0338831	disease	Mental Disorders	Mental or Behavioral Dysfunction	166	8	0.31		0	1	0	2014	2014
MMP9	4318	Mandibuloacral dysostosis	C0432291	disease	Nutritional and Metabolic Diseases; Skin and Connective Tissue Diseases; Musculoskeletal Diseases	Disease or Syndrome	17	16	0.31		1	1	0	2008	2008
MMP9	4318	Alloxan Diabetes	C0002152	disease	Nutritional and Metabolic Diseases; Endocrine System Diseases	Experimental Model of Disease	112	0	0.3		1	2	0	2011	2012
MMP9	4318	Aortic Diseases	C0003493	group	Cardiovascular Diseases	Disease or Syndrome	43	2	0.3		1	1	0	2004	2004
MMP9	4318	Arteriosclerosis	C0003850	disease	Cardiovascular Diseases	Disease or Syndrome	2006	267	0.3		0.975	40	0	1998	2019
MMP9	4318	Cholestasis, Extrahepatic	C0005398	disease	Digestive System Diseases	Disease or Syndrome	87	0	0.3		1	1	0	2017	2017
MMP9	4318	Cerebral Edema	C0006114	phenotype	Nervous System Diseases	Pathologic Function	26	0	0.3		1	1	0	2004	2004
MMP9	4318	Calcinosis	C0006663	phenotype	Nutritional and Metabolic Diseases	Pathologic Function	52	0	0.3		1	2	0	2004	2011
MMP9	4318	Neoplastic Cell Transformation	C0007621	phenotype	Pathological Conditions, Signs and Symptoms; Neoplasms	Neoplastic Process	143	0	0.3		1	3	0	2004	2012
MMP9	4318	Colorectal Neoplasms	C0009404	group	Digestive System Diseases; Neoplasms	Neoplastic Process	1296	609	0.3		1	20	0	2002	2013
MMP9	4318	Coronary Arteriosclerosis	C0010054	disease	Cardiovascular Diseases	Disease or Syndrome	1282	440	0.3		0.971	34	2	1999	2019
MMP9	4318	Coronary heart disease	C0010068	disease	Cardiovascular Diseases	Disease or Syndrome	1576	1178	0.3		0.971	34	2	2002	2019
MMP9	4318	Diabetes Mellitus, Non-Insulin-Dependent	C0011860	disease	Nutritional and Metabolic Diseases; Endocrine System Diseases	Disease or Syndrome	3134	2672	0.3		1	20	2	2001	2019
MMP9	4318	Diabetic Nephropathy	C0011881	disease	Female Urogenital Diseases and Pregnancy Complications; Male Urogenital Diseases; Endocrine System Diseases	Disease or Syndrome	1189	238	0.3		1	22	1	2001	2019
MMP9	4318	Diabetic Neuropathies	C0011882	group	Nervous System Diseases; Endocrine System Diseases	Disease or Syndrome	144	12	0.3		1	1	0	2010	2010
MMP9	4318	Endometriosis	C0014175	disease	Female Urogenital Diseases and Pregnancy Complications	Disease or Syndrome	1188	274	0.3		0.931	29	4	2002	2019
MMP9	4318	Heart failure	C0018801	disease	Cardiovascular Diseases	Disease or Syndrome	1499	201	0.3		1	17	0	2001	2020
MMP9	4318	Congestive heart failure	C0018802	disease	Cardiovascular Diseases	Disease or Syndrome	1760	165	0.3		1	16	0	2001	2020
MMP9	4318	Hepatitis, Toxic	C0019193	disease	Digestive System Diseases; Chemically-Induced Disorders	Injury or Poisoning	412	0	0.3		1	1	0	2012	2012
MMP9	4318	Kidney Diseases	C0022658	group	Female Urogenital Diseases and Pregnancy Complications; Male Urogenital Diseases	Disease or Syndrome	1180	140	0.3		1	11	0	2003	2018
MMP9	4318	Lead Poisoning	C0023176	disease	Chemically-Induced Disorders	Injury or Poisoning	9	0	0.3		1	1	0	2006	2006
MMP9	4318	Liver Cirrhosis, Experimental	C0023893	disease	Pathological Conditions, Signs and Symptoms; Digestive System Diseases	Experimental Model of Disease	870	0	0.3		1	1	0	2004	2004
MMP9	4318	Morphine Dependence	C0026552	disease	Chemically-Induced Disorders; Mental Disorders	Mental or Behavioral Dysfunction	44	0	0.3		1	1	0	2010	2010
MMP9	4318	Pericementitis	C0031051	disease	Stomatognathic Diseases	Disease or Syndrome	3	0	0.3		1	2	0	2012	2013
MMP9	4318	Pyemia	C0034189	phenotype	Pathological Conditions, Signs and Symptoms; Infections	Pathologic Function	24	0	0.3		1	1	0	2005	2005
MMP9	4318	Streptozotocin Diabetes	C0038433	disease	Nutritional and Metabolic Diseases; Endocrine System Diseases	Experimental Model of Disease	112	0	0.3		1	2	0	2011	2012
MMP9	4318	Cerebrovascular accident	C0038454	group	Nervous System Diseases; Cardiovascular Diseases	Disease or Syndrome	1658	591	0.3		0.976	41	2	2003	2019
MMP9	4318	Subarachnoid Hemorrhage	C0038525	disease	Pathological Conditions, Signs and Symptoms; Nervous System Diseases; Cardiovascular Diseases	Disease or Syndrome	501	26	0.3		0.941	17	3	2007	2019
MMP9	4318	Substance Withdrawal Syndrome	C0038587	disease	Chemically-Induced Disorders; Mental Disorders	Mental or Behavioral Dysfunction	80	5	0.3		1	1	0	2010	2010
MMP9	4318	Drug Withdrawal Symptoms	C0086189	phenotype	Chemically-Induced Disorders; Mental Disorders	Sign or Symptom	58	0	0.3		1	1	0	2010	2010
MMP9	4318	Liver Dysfunction	C0086565	phenotype	Digestive System Diseases	Finding	73	0	0.3		1	1	0	2010	2010
MMP9	4318	Withdrawal Symptoms	C0087169	phenotype	Chemically-Induced Disorders; Mental Disorders	Sign or Symptom	126	10	0.3		1	1	0	2010	2010
MMP9	4318	Premature Birth	C0151526	phenotype	Female Urogenital Diseases and Pregnancy Complications	Pathologic Function	192	50	0.3		1	1	0	2014	2014
MMP9	4318	Subependymal Giant Cell Astrocytoma	C0205768	disease	Neoplasms	Neoplastic Process	44	2	0.3		1	1	0	2010	2010
MMP9	4318	Middle Cerebral Artery Syndrome	C0238281	phenotype	Pathological Conditions, Signs and Symptoms; Nervous System Diseases; Cardiovascular Diseases	Disease or Syndrome	35	0	0.3		1	1	0	2009	2009
MMP9	4318	Tumoral calcinosis	C0263628	disease	Nutritional and Metabolic Diseases	Disease or Syndrome	45	3	0.3		1	2	0	2004	2011
MMP9	4318	Panacinar Emphysema	C0264393	disease	Respiratory Tract Diseases	Disease or Syndrome	12	1	0.3		1	1	0	2014	2014
MMP9	4318	Chronic Periodontitis	C0266929	disease	Stomatognathic Diseases	Disease or Syndrome	287	99	0.3		0.909	11	0	2005	2018
MMP9	4318	Symmetric Diabetic Proximal Motor Neuropathy	C0271673	disease	Nervous System Diseases; Endocrine System Diseases	Disease or Syndrome	14	0	0.3		1	1	0	2010	2010
MMP9	4318	Asymmetric Diabetic Proximal Motor Neuropathy	C0271674	disease	Nervous System Diseases; Endocrine System Diseases	Disease or Syndrome	14	0	0.3		1	1	0	2010	2010
MMP9	4318	Diabetic Mononeuropathy	C0271678	disease	Nervous System Diseases; Endocrine System Diseases	Disease or Syndrome	14	0	0.3		1	1	0	2010	2010
MMP9	4318	Diabetic Polyneuropathies	C0271680	group	Nervous System Diseases; Endocrine System Diseases	Disease or Syndrome	42	16	0.3		1	1	0	2010	2010
MMP9	4318	Diabetic Amyotrophy	C0271685	disease	Nervous System Diseases; Endocrine System Diseases	Disease or Syndrome	14	0	0.3		1	1	0	2010	2010
MMP9	4318	Diabetic Autonomic Neuropathy	C0271686	disease	Nervous System Diseases; Endocrine System Diseases	Disease or Syndrome	14	0	0.3		1	1	0	2010	2010
MMP9	4318	Malignant Bone Neoplasm	C0279530	disease	Neoplasms; Musculoskeletal Diseases	Neoplastic Process	125	0	0.3		1	1	0	2006	2006
MMP9	4318	Juvenile Pilocytic Astrocytoma	C0280783	disease	Neoplasms	Neoplastic Process	38	2	0.3		1	1	0	2010	2010
MMP9	4318	Diffuse Astrocytoma	C0280785	disease	Neoplasms	Neoplastic Process	81	8	0.3		1	1	0	2010	2010
MMP9	4318	Protoplasmic astrocytoma	C0334580	disease	Neoplasms	Neoplastic Process	29	0	0.3		1	1	0	2010	2010
MMP9	4318	Gemistocytic astrocytoma	C0334581	disease	Neoplasms	Neoplastic Process	45	0	0.3		1	1	0	2010	2010
MMP9	4318	Fibrillary Astrocytoma	C0334582	disease	Neoplasms	Neoplastic Process	32	0	0.3		1	1	0	2010	2010
MMP9	4318	Pilocytic Astrocytoma	C0334583	disease	Neoplasms	Neoplastic Process	163	14	0.3		1	1	0	2010	2010
MMP9	4318	Giant Cell Glioblastoma	C0334588	disease	Neoplasms	Neoplastic Process	95	3	0.3		1	1	0	2006	2006
MMP9	4318	Childhood Cerebral Astrocytoma	C0338070	disease	Neoplasms	Neoplastic Process	28	0	0.3		1	1	0	2010	2010
MMP9	4318	Aortic Aneurysm, Thoracoabdominal	C0340630	disease	Cardiovascular Diseases	Disease or Syndrome	11	0	0.3		1	1	0	2005	2005
MMP9	4318	Diabetic Asymmetric Polyneuropathy	C0393835	disease	Nervous System Diseases; Endocrine System Diseases	Disease or Syndrome	14	0	0.3		1	1	0	2010	2010
MMP9	4318	Vasogenic Cerebral Edema	C0472387	phenotype	Nervous System Diseases	Pathologic Function	8	0	0.3		1	1	0	2004	2004
MMP9	4318	Cytotoxic Cerebral Edema	C0472388	phenotype	Nervous System Diseases	Pathologic Function	8	0	0.3		1	1	0	2004	2004
MMP9	4318	Microcalcification	C0521174	phenotype	Nutritional and Metabolic Diseases	Pathologic Function	42	0	0.3		1	2	0	2004	2011
MMP9	4318	Mixed oligoastrocytoma	C0547065	disease	Neoplasms	Neoplastic Process	30	0	0.3		1	1	0	2010	2010
MMP9	4318	Morphine Abuse	C0600272	disease	Chemically-Induced Disorders; Mental Disorders	Mental or Behavioral Dysfunction	8	0	0.3		1	1	0	2010	2010
MMP9	4318	Stomach Carcinoma	C0699791	disease	Digestive System Diseases; Neoplasms	Neoplastic Process	3720	652	0.3		0.96	50	1	2005	2019
MMP9	4318	Middle Cerebral Artery Thrombosis	C0740376	disease	Pathological Conditions, Signs and Symptoms; Nervous System Diseases; Cardiovascular Diseases	Disease or Syndrome	35	0	0.3		1	1	0	2009	2009
MMP9	4318	Aortic Aneurysm, Ruptured	C0741160	disease	Cardiovascular Diseases; Wounds and Injuries	Disease or Syndrome	13	1	0.3		1	1	0	2008	2008
MMP9	4318	Cerebral Astrocytoma	C0750935	disease	Neoplasms	Neoplastic Process	32	0	0.3		1	1	0	2010	2010
MMP9	4318	Intracranial Astrocytoma	C0750936	disease	Neoplasms	Neoplastic Process	26	0	0.3		1	1	0	2010	2010
MMP9	4318	Vasogenic Brain Edema	C0750969	phenotype	Nervous System Diseases	Pathologic Function	8	0	0.3		1	1	0	2004	2004
MMP9	4318	Cytotoxic Brain Edema	C0750970	phenotype	Nervous System Diseases	Pathologic Function	8	0	0.3		1	1	0	2004	2004
MMP9	4318	Diabetic Neuralgia	C0751074	disease	Nervous System Diseases; Endocrine System Diseases	Disease or Syndrome	36	0	0.3		1	1	0	2010	2010
MMP9	4318	Middle Cerebral Artery Embolus	C0751845	phenotype	Pathological Conditions, Signs and Symptoms; Nervous System Diseases; Cardiovascular Diseases	Disease or Syndrome	35	0	0.3		1	1	0	2009	2009
MMP9	4318	Left Middle Cerebral Artery Infarction	C0751846	phenotype	Pathological Conditions, Signs and Symptoms; Nervous System Diseases; Cardiovascular Diseases	Disease or Syndrome	35	0	0.3		1	1	0	2009	2009
MMP9	4318	Embolic Infarction, Middle Cerebral Artery	C0751847	phenotype	Pathological Conditions, Signs and Symptoms; Nervous System Diseases; Cardiovascular Diseases	Disease or Syndrome	35	0	0.3		1	1	0	2009	2009
MMP9	4318	Thrombotic Infarction, Middle Cerebral Artery	C0751848	phenotype	Pathological Conditions, Signs and Symptoms; Nervous System Diseases; Cardiovascular Diseases	Disease or Syndrome	35	0	0.3		1	1	0	2009	2009
MMP9	4318	Right Middle Cerebral Artery Infarction	C0751849	phenotype	Pathological Conditions, Signs and Symptoms; Nervous System Diseases; Cardiovascular Diseases	Disease or Syndrome	35	0	0.3		1	1	0	2009	2009
MMP9	4318	Drug-Induced Liver Disease	C0860207	phenotype	Digestive System Diseases; Chemically-Induced Disorders	Disease or Syndrome	537	29	0.3		1	1	0	2012	2012
MMP9	4318	Disproportionate short stature	C0878659	phenotype	Congenital, Hereditary, and Neonatal Diseases and Abnormalities; Musculoskeletal Diseases; Endocrine System Diseases	Finding	86	6	0.3			0	0
MMP9	4318	Cerebral Ischemia	C0917798	disease	Nervous System Diseases; Cardiovascular Diseases	Pathologic Function	120	2	0.3		1	1	0	2004	2004
MMP9	4318	Mammary Neoplasms, Human	C1257931	disease	Neoplasms; Skin and Connective Tissue Diseases	Neoplastic Process	527	0	0.3		1	1	0	2011	2011
MMP9	4318	Hepatitis, Drug-Induced	C1262760	disease	Digestive System Diseases; Chemically-Induced Disorders	Disease or Syndrome	418	0	0.3		1	1	0	2012	2012
MMP9	4318	Chronic Airflow Obstruction	C1527303	disease	Respiratory Tract Diseases	Disease or Syndrome	35	0	0.3		1	1	0	2009	2009
MMP9	4318	Grade I Astrocytoma	C1704230	disease	Neoplasms	Neoplastic Process	35	0	0.3		1	1	0	2010	2010
MMP9	4318	Severe Sepsis	C1719672	disease	Pathological Conditions, Signs and Symptoms; Infections	Disease or Syndrome	181	29	0.3		1	1	0	2005	2005
MMP9	4318	Focal Emphysema	C2350878	disease	Respiratory Tract Diseases	Disease or Syndrome	12	0	0.3		1	1	0	2014	2014
MMP9	4318	Neointima Formation	C2936381	phenotype	Pathological Conditions, Signs and Symptoms	Pathologic Function	6	0	0.3		1	1	0	2007	2007
MMP9	4318	Cerebral Hemorrhage	C2937358	phenotype	Pathological Conditions, Signs and Symptoms; Nervous System Diseases; Cardiovascular Diseases	Pathologic Function	122	78	0.3		1	5	0	2004	2009
MMP9	4318	Drug-Induced Acute Liver Injury	C3658290	disease	Digestive System Diseases; Chemically-Induced Disorders	Disease or Syndrome	413	0	0.3		1	1	0	2012	2012
MMP9	4318	Chemical and Drug Induced Liver Injury	C4277682	disease	Digestive System Diseases; Chemically-Induced Disorders	Disease or Syndrome	461	38	0.3		1	1	0	2012	2012
MMP9	4318	Chemically-Induced Liver Toxicity	C4279912	disease	Digestive System Diseases; Chemically-Induced Disorders	Disease or Syndrome	412	0	0.3		1	1	0	2012	2012
MMP9	4318	Mammary Carcinoma, Human	C4704874	disease	Neoplasms; Skin and Connective Tissue Diseases	Neoplastic Process	545	0	0.3		1	1	0	2011	2011
MMP9	4318	Alveolitis, Fibrosing	C4721507	disease	Respiratory Tract Diseases	Disease or Syndrome	91	4	0.3		1	1	0	2011	2011
MMP9	4318	Marfan Syndrome, Type I	C4721845	disease	Congenital, Hereditary, and Neonatal Diseases and Abnormalities; Skin and Connective Tissue Diseases; Musculoskeletal Diseases; Cardiovascular Diseases	Disease or Syndrome	11	0	0.3		1	1	0	2008	2008
MMP9	4318	Lung diseases	C0024115	group	Respiratory Tract Diseases	Disease or Syndrome	700	50	0.29		1	11	0	2003	2018
MMP9	4318	Hyperglycemia	C0020456	disease	Nutritional and Metabolic Diseases	Disease or Syndrome	1098	108	0.28		1	8	0	2007	2019
MMP9	4318	Intracranial Aneurysm	C0007766	disease	Nervous System Diseases; Cardiovascular Diseases	Disease or Syndrome	311	150	0.27		1	11	0	1999	2019
MMP9	4318	Cardiac fibrosis	C1397307	disease		Disease or Syndrome	297	3	0.27		1	8	0	2005	2019
MMP9	4318	Renal fibrosis	C0151650	disease	Pathological Conditions, Signs and Symptoms; Female Urogenital Diseases and Pregnancy Complications; Male Urogenital Diseases	Disease or Syndrome	570	1	0.26		1	7	0	2012	2019
MMP9	4318	Cholangiocarcinoma	C0206698	disease	Neoplasms	Neoplastic Process	877	43	0.25		1	6	0	2004	2017
MMP9	4318	Glomerulonephritis	C0017658	disease	Female Urogenital Diseases and Pregnancy Complications; Male Urogenital Diseases	Disease or Syndrome	391	7	0.24		1	6	0	1996	2017
MMP9	4318	Huntington Disease	C0020179	disease	Congenital, Hereditary, and Neonatal Diseases and Abnormalities; Nervous System Diseases; Mental Disorders	Disease or Syndrome	978	115	0.23		1	4	0	1998	2017
MMP9	4318	Myocardial Ischemia	C0151744	disease	Cardiovascular Diseases	Disease or Syndrome	756	103	0.23		1	4	0	2004	2015
MMP9	4318	Transient Ischemic Attack	C0007787	disease	Nervous System Diseases; Cardiovascular Diseases	Disease or Syndrome	344	16	0.22		1	5	0	2001	2017
MMP9	4318	Arteriovenous fistula	C0003855	phenotype	Pathological Conditions, Signs and Symptoms; Congenital, Hereditary, and Neonatal Diseases and Abnormalities; Cardiovascular Diseases	Anatomical Abnormality	93	8	0.21		1	2	0	2007	2010
MMP9	4318	Focal glomerulosclerosis	C0017668	disease	Female Urogenital Diseases and Pregnancy Complications; Male Urogenital Diseases	Disease or Syndrome	281	50	0.21		1	2	0	2007	2009
MMP9	4318	Hepatic Veno-Occlusive Disease	C0019156	disease	Digestive System Diseases; Cardiovascular Diseases	Disease or Syndrome	37	2	0.21		1	2	0	2013	2018
MMP9	4318	Meningococcal meningitis	C0025294	disease	Infections; Nervous System Diseases	Disease or Syndrome	17	3	0.21		1	1	0	1999	1999
MMP9	4318	Meningitis, Pneumococcal	C0025295	disease	Infections; Nervous System Diseases	Disease or Syndrome	88	13	0.21		1	3	0	2003	2014
MMP9	4318	Delirium, Dementia, Amnestic, Cognitive Disorders	C0029227	group	Mental Disorders	Mental or Behavioral Dysfunction	83	0	0.21		1	2	0	2012	2017
MMP9	4318	Status Epilepticus	C0038220	disease	Pathological Conditions, Signs and Symptoms; Nervous System Diseases	Disease or Syndrome	533	12	0.21		1	2	0	2007	2016
MMP9	4318	Alcohol abuse	C0085762	disease	Chemically-Induced Disorders; Mental Disorders	Mental or Behavioral Dysfunction	156	24	0.21		1	2	0	2007	2014
MMP9	4318	Glomerulosclerosis (disorder)	C0178664	disease	Female Urogenital Diseases and Pregnancy Complications; Male Urogenital Diseases; Cardiovascular Diseases	Disease or Syndrome	221	3	0.21		1	3	0	1997	2017
MMP9	4318	Idiopathic crescentic glomerulonephritis	C0403416	disease	Female Urogenital Diseases and Pregnancy Complications; Male Urogenital Diseases	Disease or Syndrome	80	0	0.21		1	2	0	2005	2017
MMP9	4318	Primary biliary cirrhosis	C0008312	disease	Pathological Conditions, Signs and Symptoms; Digestive System Diseases	Disease or Syndrome	478	667	0.2		1	1	0	2010	2010
MMP9	4318	Pathological accumulation of air in tissues	C0013990	phenotype	Pathological Conditions, Signs and Symptoms	Pathologic Function	69	6	0.2		1	1	0	2012	2012
MMP9	4318	Experimental Autoimmune Encephalomyelitis	C0014072	disease	Immune System Diseases; Nervous System Diseases	Experimental Model of Disease	97	0	0.2		1	2	0	1998	2012
MMP9	4318	Epilepsies, Partial	C0014547	disease	Nervous System Diseases	Disease or Syndrome	73	23	0.2		1	1	0	2010	2010
MMP9	4318	Absence Epilepsy	C0014553	disease	Nervous System Diseases	Disease or Syndrome	89	17	0.2		1	1	0	2010	2010
MMP9	4318	Fibrosis	C0016059	phenotype	Pathological Conditions, Signs and Symptoms	Pathologic Function	184	0	0.2		1	1	0	2010	2010
MMP9	4318	Membranous glomerulonephritis	C0017665	disease	Female Urogenital Diseases and Pregnancy Complications; Male Urogenital Diseases; Immune System Diseases	Disease or Syndrome	197	33	0.2		1	1	0	1996	1996
MMP9	4318	Cardiomegaly	C0018800	phenotype	Pathological Conditions, Signs and Symptoms; Cardiovascular Diseases	Finding	267	11	0.2		1	1	0	2006	2006
MMP9	4318	Pulmonary Hypertension	C0020542	phenotype	Respiratory Tract Diseases	Pathologic Function	156	0	0.2		1	2	0	2007	2012
MMP9	4318	Renal hypertension	C0020544	disease	Female Urogenital Diseases and Pregnancy Complications; Male Urogenital Diseases; Cardiovascular Diseases	Disease or Syndrome	36	3	0.2		1	1	0	2003	2003
MMP9	4318	Biliary cirrhosis	C0023892	disease	Pathological Conditions, Signs and Symptoms; Digestive System Diseases	Disease or Syndrome	132	36	0.2		1	1	0	2010	2010
MMP9	4318	Alcoholic Liver Diseases	C0023896	group	Digestive System Diseases; Chemically-Induced Disorders	Disease or Syndrome	195	20	0.2		1	1	0	2007	2007
MMP9	4318	Liver Neoplasms, Experimental	C0023904	phenotype	Digestive System Diseases; Neoplasms	Neoplastic Process; Experimental Model of Disease	152	0	0.2		1	2	0	2009	2009
MMP9	4318	Mycoplasma Infections	C0026936	group	Infections	Disease or Syndrome	188	1	0.2		1	1	0	2007	2007
MMP9	4318	Neuritis, Autoimmune, Experimental	C0027814	disease	Immune System Diseases; Nervous System Diseases	Experimental Model of Disease	32	0	0.2		1	1	0	1998	1998
MMP9	4318	Ocular Hypertension	C0028840	disease	Eye Diseases	Disease or Syndrome	103	8	0.2		1	1	0	2009	2009
MMP9	4318	Other emphysema	C0029607	phenotype	Pathological Conditions, Signs and Symptoms; Respiratory Tract Diseases	Disease or Syndrome	20	0	0.2		1	1	0	2010	2010
MMP9	4318	Pulmonary Embolism	C0034065	disease	Respiratory Tract Diseases; Cardiovascular Diseases	Pathologic Function	93	16	0.2		1	1	0	2005	2005
MMP9	4318	Venous Thrombosis	C0042487	phenotype	Cardiovascular Diseases	Pathologic Function	117	218	0.2		1	1	0	2010	2010
MMP9	4318	Sciatic Neuropathy	C0149940	disease	Nervous System Diseases	Disease or Syndrome	115	0	0.2		1	1	0	2014	2014
MMP9	4318	Injury of liver	C0160390	disease	Digestive System Diseases; Wounds and Injuries	Injury or Poisoning	36	0	0.2		1	1	0	2000	2000
MMP9	4318	Retinal ischemia	C0162291	disease	Eye Diseases	Pathologic Function	7	0	0.2		1	1	0	2014	2014
MMP9	4318	Right Ventricular Hypertrophy	C0162770	disease	Pathological Conditions, Signs and Symptoms; Cardiovascular Diseases	Disease or Syndrome	160	6	0.2		1	1	0	2007	2007
MMP9	4318	Dermatitis, Allergic Contact	C0162820	disease	Skin and Connective Tissue Diseases; Immune System Diseases	Disease or Syndrome	151	1	0.2		1	1	0	2006	2006
MMP9	4318	Acute Lung Injury	C0242488	disease	Respiratory Tract Diseases	Injury or Poisoning	93	3	0.2		1	1	0	2012	2012
MMP9	4318	Hyperoxia	C0242706	phenotype	Pathological Conditions, Signs and Symptoms	Sign or Symptom	50	0	0.2		1	1	0	2004	2004
MMP9	4318	Chronic myocardial ischemia	C0264694	disease	Cardiovascular Diseases	Disease or Syndrome	29	7	0.2		1	1	0	2015	2015
MMP9	4318	Adult Cholangiocarcinoma	C0280725	disease	Neoplasms	Neoplastic Process	13	0	0.2		1	1	0	2004	2004
MMP9	4318	Choroidal Neovascularization	C0600518	phenotype	Pathological Conditions, Signs and Symptoms; Eye Diseases	Pathologic Function	31	3	0.2		1	1	0	2014	2014
MMP9	4318	Ileus	C1258215	disease	Digestive System Diseases	Disease or Syndrome	20	0	0.2		1	1	0	2012	2012
MMP9	4318	Cicatrix	C2004491	phenotype	Pathological Conditions, Signs and Symptoms	Pathologic Function	4	2	0.2		1	1	0	2013	2013
MMP9	4318	Respirovirus Infections	C3714630	disease	Infections	Disease or Syndrome	1	0	0.2		1	1	0	2006	2006
MMP9	4318	Arterial Injury, CTCAE	C4553639	phenotype		Finding	4	0	0.2		1	1	0	2012	2012
MMP9	4318	Adenocarcinoma	C0001418	group	Neoplasms	Neoplastic Process	2235	168	0.1		1	13	0	2000	2015
MMP9	4318	Alzheimer's Disease	C0002395	disease	Nervous System Diseases; Mental Disorders	Disease or Syndrome	3397	1843	0.1		0.875	16	3	1996	2019
MMP9	4318	Arthritis	C0003864	disease	Musculoskeletal Diseases	Disease or Syndrome	1072	69	0.1		1	10	0	2002	2019
MMP9	4318	Rheumatoid Arthritis	C0003873	disease	Skin and Connective Tissue Diseases; Musculoskeletal Diseases; Immune System Diseases	Disease or Syndrome	2723	2387	0.1		1	32	1	1999	2019
MMP9	4318	Atherosclerosis	C0004153	disease	Cardiovascular Diseases	Disease or Syndrome	2044	281	0.1		0.975	40	0	1998	2019
MMP9	4318	Malignant Neoplasms	C0006826	group	Neoplasms	Neoplastic Process	8621	1641	0.1		0.982	218	4	1995	2020
MMP9	4318	Carcinoma	C0007097	group	Neoplasms	Neoplastic Process	2462	103	0.1		0.933	15	0	1994	2017
MMP9	4318	Malignant neoplasm of endometrium	C0007103	disease	Neoplasms; Female Urogenital Diseases and Pregnancy Complications	Neoplastic Process	1235	197	0.1		0.923	13	0	2004	2018
MMP9	4318	Renal Cell Carcinoma	C0007134	disease	Neoplasms; Female Urogenital Diseases and Pregnancy Complications; Male Urogenital Diseases	Neoplastic Process	2084	288	0.1		0.944	18	1	2006	2019
MMP9	4318	Cardiovascular Diseases	C0007222	group	Cardiovascular Diseases	Disease or Syndrome	1756	711	0.1		0.941	17	2	2003	2019
MMP9	4318	Cerebral Infarction	C0007785	disease	Pathological Conditions, Signs and Symptoms; Nervous System Diseases; Cardiovascular Diseases	Disease or Syndrome	687	123	0.1		0.905	21	0	2003	2019
MMP9	4318	Malignant tumor of cervix	C0007847	disease	Neoplasms; Female Urogenital Diseases and Pregnancy Complications	Neoplastic Process	1718	245	0.1		1	10	1	2002	2019
MMP9	4318	Colitis	C0009319	disease	Digestive System Diseases	Disease or Syndrome	1135	15	0.1		0.923	13	0	2005	2019
MMP9	4318	Colorectal Carcinoma	C0009402	disease	Digestive System Diseases; Neoplasms	Neoplastic Process	5473	1962	0.1		0.984	61	5	1995	2019
MMP9	4318	Diabetes	C0011847	disease	Endocrine System Diseases	Disease or Syndrome	2359	710	0.1		1	13	0	2002	2018
MMP9	4318	Diabetes Mellitus	C0011849	group	Nutritional and Metabolic Diseases; Endocrine System Diseases	Disease or Syndrome	2803	824	0.1		1	22	0	2002	2019
MMP9	4318	Diabetic Retinopathy	C0011884	disease	Eye Diseases; Endocrine System Diseases; Cardiovascular Diseases	Disease or Syndrome	645	213	0.1		1	12	0	2011	2019
MMP9	4318	Dwarfism	C0013336	disease	Congenital, Hereditary, and Neonatal Diseases and Abnormalities; Musculoskeletal Diseases; Endocrine System Diseases	Congenital Abnormality	1261	77	0.1			0	0
MMP9	4318	Fibrosarcoma	C0016057	disease	Neoplasms	Neoplastic Process	413	9	0.1		1	24	1	1990	2018
MMP9	4318	Glioma	C0017638	disease	Neoplasms	Neoplastic Process	3097	353	0.1		0.977	43	0	1995	2019
MMP9	4318	Chronic Lymphocytic Leukemia	C0023434	disease	Neoplasms; Immune System Diseases; Hemic and Lymphatic Diseases	Neoplastic Process	1447	291	0.1		1	14	1	2004	2019
MMP9	4318	Leukemia, Myelocytic, Acute	C0023467	disease	Neoplasms	Neoplastic Process	3111	6892	0.1		1	11	1	1999	2019
MMP9	4318	Lung Neoplasms	C0024121	group	Neoplasms; Respiratory Tract Diseases	Neoplastic Process	1486	39	0.1		1	16	0	2002	2018
MMP9	4318	Lupus Erythematosus, Systemic	C0024141	disease	Skin and Connective Tissue Diseases; Immune System Diseases	Disease or Syndrome	1883	1172	0.1		0.917	12	1	2003	2019
MMP9	4318	Malignant neoplasm of stomach	C0024623	disease	Digestive System Diseases; Neoplasms	Neoplastic Process	3806	615	0.1		0.958	48	1	2005	2019
MMP9	4318	melanoma	C0025202	disease	Neoplasms	Neoplastic Process	3087	515	0.1		1	24	1	1999	2019
MMP9	4318	Meningioma	C0025286	disease	Neoplasms; Nervous System Diseases	Neoplastic Process	634	43	0.1		1	10	0	2006	2018
MMP9	4318	Multiple Sclerosis	C0026769	disease	Immune System Diseases; Nervous System Diseases	Disease or Syndrome	1800	1022	0.1		0.927	41	1	1996	2019
MMP9	4318	Neoplasms	C0027651	group	Neoplasms	Neoplastic Process	10161	1644	0.1		0.977	352	0	1992	2020
MMP9	4318	Neuroblastoma	C0027819	disease	Neoplasms	Neoplastic Process	2509	386	0.1		1	15	0	1999	2018
MMP9	4318	Degenerative polyarthritis	C0029408	disease	Musculoskeletal Diseases	Disease or Syndrome	1827	247	0.1		1	25	0	1997	2019
MMP9	4318	Osteosarcoma	C0029463	disease	Neoplasms	Neoplastic Process	2283	178	0.1		1	45	0	1990	2019
MMP9	4318	Tuberculosis	C0041296	disease	Infections	Disease or Syndrome	1256	328	0.1		0.909	11	0	2003	2019
MMP9	4318	B-Cell Lymphomas	C0079731	group	Neoplasms; Immune System Diseases; Hemic and Lymphatic Diseases	Neoplastic Process	1408	42	0.1		1	17	0	2012	2020
MMP9	4318	Adenocarcinoma of lung (disorder)	C0152013	disease	Neoplasms	Neoplastic Process	2438	563	0.1		1	15	0	2007	2019
MMP9	4318	Secondary malignant neoplasm of lung	C0153676	disease	Neoplasms; Respiratory Tract Diseases	Neoplastic Process	1370	20	0.1		1	12	0	2005	2019
MMP9	4318	Acute myocardial infarction	C0155626	disease	Pathological Conditions, Signs and Symptoms; Cardiovascular Diseases	Disease or Syndrome	766	118	0.1		1	19	0	2007	2020
MMP9	4318	Joint stiffness	C0162298	phenotype	Musculoskeletal Diseases	Sign or Symptom	163	14	0.1			0	0
MMP9	4318	Tumor Progression	C0178874	phenotype	Pathological Conditions, Signs and Symptoms	Neoplastic Process	3865	72	0.1		1	47	0	2002	2020
MMP9	4318	Pancreatic carcinoma	C0235974	disease	Digestive System Diseases; Neoplasms; Endocrine System Diseases	Neoplastic Process	2689	322	0.1		0.95	20	0	1995	2019
MMP9	4318	Papillary thyroid carcinoma	C0238463	disease	Neoplasms; Endocrine System Diseases	Neoplastic Process	1348	204	0.1		1	14	0	2008	2019
MMP9	4318	Fibrosis, Liver	C0239946	disease	Pathological Conditions, Signs and Symptoms; Digestive System Diseases	Disease or Syndrome	1179	64	0.1		1	13	1	2004	2019
MMP9	4318	Malignant neoplasm of lung	C0242379	disease	Neoplasms; Respiratory Tract Diseases	Neoplastic Process	4173	1142	0.1		0.942	52	3	2001	2019
MMP9	4318	Adult Fibrosarcoma	C0278595	disease	Neoplasms	Neoplastic Process	387	9	0.1		1	22	1	1990	2018
MMP9	4318	Adult Glioblastoma	C0278878	disease	Neoplasms	Neoplastic Process	2528	98	0.1		1	31	0	1996	2019
MMP9	4318	Squamous cell carcinoma of esophagus	C0279626	disease	Digestive System Diseases; Neoplasms	Neoplastic Process	2053	329	0.1		0.944	18	2	2004	2019
MMP9	4318	Conventional (Clear Cell) Renal Cell Carcinoma	C0279702	disease	Neoplasms; Female Urogenital Diseases and Pregnancy Complications; Male Urogenital Diseases	Neoplastic Process	2346	222	0.1		0.95	20	1	2006	2019
MMP9	4318	Childhood Glioblastoma	C0280474	disease	Neoplasms	Neoplastic Process	2527	98	0.1		1	31	0	1996	2019
MMP9	4318	Cervix carcinoma	C0302592	disease	Neoplasms; Female Urogenital Diseases and Pregnancy Complications	Neoplastic Process	1881	283	0.1		1	13	1	2002	2019
MMP9	4318	Short stature	C0349588	phenotype		Finding	1127	292	0.1			0	0
MMP9	4318	Endometrial Carcinoma	C0476089	disease	Neoplasms; Female Urogenital Diseases and Pregnancy Complications	Neoplastic Process	1597	326	0.1		0.941	17	0	1999	2018
MMP9	4318	Secondary malignant neoplasm of liver	C0494165	disease	Digestive System Diseases; Neoplasms	Neoplastic Process	951	34	0.1		1	14	0	1995	2018
MMP9	4318	Serum albumin measurement	C0523465	phenotype		Laboratory Procedure	433	3282	0.1		1	1	7	2012	2012
MMP9	4318	Genu varum	C0544755	phenotype	Musculoskeletal Diseases	Finding	60	6	0.1			0	0
MMP9	4318	Osteosarcoma of bone	C0585442	disease	Neoplasms	Neoplastic Process	2247	151	0.1		1	43	0	1990	2019
MMP9	4318	Carcinogenesis	C0596263	phenotype	Pathological Conditions, Signs and Symptoms; Neoplasms	Neoplastic Process	6243	355	0.1		1	38	0	2001	2019
MMP9	4318	Prostate carcinoma	C0600139	disease	Neoplasms; Male Urogenital Diseases	Neoplastic Process	4388	1168	0.1		0.984	61	1	1998	2020
MMP9	4318	Carcinoma of lung	C0684249	disease	Neoplasms; Respiratory Tract Diseases	Neoplastic Process	4081	1204	0.1		0.943	53	3	2001	2019
MMP9	4318	Secondary malignant neoplasm of lymph node	C0686619	disease	Pathological Conditions, Signs and Symptoms; Neoplasms	Neoplastic Process	2825	188	0.1		0.949	39	0	2000	2019
MMP9	4318	Colon Carcinoma	C0699790	disease	Digestive System Diseases; Neoplasms	Neoplastic Process	2832	275	0.1		1	28	0	1996	2019
MMP9	4318	Carcinoma of bladder	C0699885	disease	Neoplasms; Female Urogenital Diseases and Pregnancy Complications; Male Urogenital Diseases	Neoplastic Process	2104	309	0.1		0.967	30	3	1994	2020
MMP9	4318	Central neuroblastoma	C0700095	disease	Neoplasms; Nervous System Diseases	Neoplastic Process	2419	231	0.1		1	15	0	1999	2018
MMP9	4318	Pregnancy associated hypertension	C0852036	phenotype	Female Urogenital Diseases and Pregnancy Complications; Cardiovascular Diseases	Disease or Syndrome	186	43	0.1		1	12	2	2005	2020
MMP9	4318	ovarian neoplasm	C0919267	disease	Neoplasms; Female Urogenital Diseases and Pregnancy Complications; Endocrine System Diseases	Neoplastic Process	2542	757	0.1		1	16	0	1998	2018
MMP9	4318	Ischemic stroke	C0948008	disease	Nervous System Diseases; Cardiovascular Diseases	Disease or Syndrome	1159	704	0.1		0.931	29	2	2010	2020
MMP9	4318	Deformity of lower limb	C1096086	disease		Anatomical Abnormality	11	5	0.1			0	0
MMP9	4318	Malignant neoplasm of ovary	C1140680	disease	Neoplasms; Female Urogenital Diseases and Pregnancy Complications; Endocrine System Diseases	Neoplastic Process	2563	315	0.1		1	16	0	1998	2018
MMP9	4318	Squamous cell carcinoma of the head and neck	C1168401	disease	Neoplasms	Neoplastic Process	1543	348	0.1		0.944	18	0	2000	2019
MMP9	4318	Tumor Cell Invasion	C1269955	phenotype		Neoplastic Process	6626	169	0.1		0.993	1003	2	1991	2020
MMP9	4318	Primary malignant neoplasm	C1306459	group	Neoplasms	Neoplastic Process	8221	1374	0.1		0.985	201	4	1995	2020
MMP9	4318	Primary malignant neoplasm of lung	C1306460	disease	Neoplasms; Respiratory Tract Diseases	Neoplastic Process	3894	981	0.1		0.94	50	3	2001	2019
MMP9	4318	Childhood Osteosarcoma	C1332986	disease	Neoplasms	Neoplastic Process	2208	151	0.1		1	43	0	1990	2019
MMP9	4318	Tumor Angiogenesis	C1519670	phenotype	Pathological Conditions, Signs and Symptoms	Neoplastic Process	822	5	0.1		1	15	0	2000	2019
MMP9	4318	Short femoral neck	C1836184	phenotype		Finding	31	0	0.1			0	0
MMP9	4318	Metaphyseal irregularity	C1838662	phenotype		Finding	34	0	0.1			0	0
MMP9	4318	Metaphyseal widening	C1849039	phenotype		Finding	43	3	0.1			0	0
MMP9	4318	Bowing of the long bones	C1855340	phenotype		Congenital Abnormality	63	5	0.1			0	0
MMP9	4318	Coronary Artery Disease	C1956346	disease	Cardiovascular Diseases	Disease or Syndrome	1708	1577	0.1		1	43	4	2002	2020
MMP9	4318	Influenza due to Influenza A virus subtype H1N1	C2076600	disease	Infections; Respiratory Tract Diseases	Disease or Syndrome	44	65	0.1		1	1	1	2015	2015
MMP9	4318	Aplasia/Hypoplasia of the radius	C2749463	phenotype		Finding	45	0	0.1			0	0
MMP9	4318	Short Stature, CTCAE	C2919142	phenotype		Finding	1010	0	0.1			0	0
MMP9	4318	Nasopharyngeal carcinoma	C2931822	disease	Neoplasms; Stomatognathic Diseases; Otorhinolaryngologic Diseases	Neoplastic Process	1553	320	0.1		0.926	27	1	1999	2019
MMP9	4318	Secondary Neoplasm	C2939419	group	Pathological Conditions, Signs and Symptoms; Neoplasms	Neoplastic Process	2492	85	0.1		0.979	48	1	1996	2020
MMP9	4318	Blood Protein Measurement	C2985280	phenotype		Laboratory Procedure	1156	2575	0.1		1	1	1	2018	2018
MMP9	4318	Triple Negative Breast Neoplasms	C3539878	disease	Neoplasms; Skin and Connective Tissue Diseases	Neoplastic Process	1674	99	0.1		1	10	0	2014	2019
MMP9	4318	Abnormality of epiphysis morphology	C4021611	phenotype		Anatomical Abnormality	86	0	0.1			0	0
MMP9	4318	Abnormality of ulnar metaphysis	C4025424	disease		Anatomical Abnormality	3	0	0.1			0	0
MMP9	4318	cervical cancer	C4048328	disease	Neoplasms; Female Urogenital Diseases and Pregnancy Complications	Neoplastic Process	1817	268	0.1		1	10	1	2002	2019
MMP9	4318	Childhood Neuroblastoma	C4086165	disease	Neoplasms	Neoplastic Process	2420	231	0.1		1	15	0	1999	2018
MMP9	4318	Carcinoma, Ovarian Epithelial	C4721610	disease	Neoplasms; Female Urogenital Diseases and Pregnancy Complications; Endocrine System Diseases	Neoplastic Process	2841	327	0.1		1	15	0	1998	2019
MMP9	4318	Malignant neoplasm of colon and/or rectum	C4722085	disease		Neoplastic Process	3669	502	0.1		0.947	38	2	1995	2019
MMP9	4318	Atrial Fibrillation	C0004238	disease	Pathological Conditions, Signs and Symptoms; Cardiovascular Diseases	Disease or Syndrome	939	584	0.09		0.889	9	2	2009	2019
MMP9	4318	Cystic Fibrosis	C0010674	disease	Congenital, Hereditary, and Neonatal Diseases and Abnormalities; Digestive System Diseases; Respiratory Tract Diseases	Disease or Syndrome	852	704	0.09		1	9	0	2007	2020
MMP9	4318	Inflammatory Bowel Diseases	C0021390	group	Digestive System Diseases	Disease or Syndrome	1577	605	0.09		1	9	0	2001	2019
MMP9	4318	Nasal Polyps	C0027430	disease	Pathological Conditions, Signs and Symptoms; Respiratory Tract Diseases; Otorhinolaryngologic Diseases	Disease or Syndrome	484	34	0.09		0.889	9	0	2003	2019
MMP9	4318	Pain	C0030193	phenotype	Pathological Conditions, Signs and Symptoms	Sign or Symptom	1554	196	0.09		1	9	1	2009	2019
MMP9	4318	Malignant neoplasm of mouth	C0153381	group	Neoplasms; Stomatognathic Diseases	Neoplastic Process	756	184	0.09		1	9	0	2007	2019
MMP9	4318	Glaucoma, Primary Open Angle	C0339573	disease	Eye Diseases	Disease or Syndrome	383	222	0.09		1	9	1	2010	2019
MMP9	4318	Triple-Negative Breast Carcinoma	C4722518	disease	Neoplasms; Skin and Connective Tissue Diseases	Neoplastic Process	1598	96	0.09		1	9	0	2014	2019
MMP9	4318	Diabetic wound	C4728046	disease		Disease or Syndrome	72	0	0.09		1	9	0	2017	2020
MMP9	4318	Autoimmune Diseases	C0004364	group	Immune System Diseases	Disease or Syndrome	1758	428	0.08		1	8	0	2003	2018
MMP9	4318	Fragile X Syndrome	C0016667	disease	Congenital, Hereditary, and Neonatal Diseases and Abnormalities; Nervous System Diseases	Disease or Syndrome	194	11	0.08		1	8	0	2010	2019
MMP9	4318	Angle Closure Glaucoma	C0017605	disease	Eye Diseases	Disease or Syndrome	94	56	0.08		0.75	8	5	2006	2018
MMP9	4318	Primary angle-closure glaucoma	C0017606	disease	Eye Diseases	Disease or Syndrome	87	55	0.08		0.75	8	5	2006	2018
MMP9	4318	Myeloid Leukemia, Chronic	C0023473	disease	Neoplasms; Hemic and Lymphatic Diseases	Neoplastic Process	1172	115	0.08		1	8	0	2003	2015
MMP9	4318	Mucocutaneous Lymph Node Syndrome	C0026691	disease	Skin and Connective Tissue Diseases; Hemic and Lymphatic Diseases; Cardiovascular Diseases	Disease or Syndrome	370	195	0.08		1	8	0	2001	2019
MMP9	4318	Systemic Scleroderma	C0036421	disease	Skin and Connective Tissue Diseases	Disease or Syndrome	979	287	0.08		0.875	8	1	2002	2019
MMP9	4318	Giant Cell Tumor of Bone	C0206638	disease	Neoplasms	Neoplastic Process	113	3	0.08		1	8	0	1994	2019
MMP9	4318	Dissection of aorta	C0340643	disease	Cardiovascular Diseases	Disease or Syndrome	152	16	0.08		1	8	1	1998	2019
MMP9	4318	Acute Chest Syndrome	C0742343	disease	Congenital, Hereditary, and Neonatal Diseases and Abnormalities; Respiratory Tract Diseases; Hemic and Lymphatic Diseases	Disease or Syndrome	405	135	0.08		1	8	0	2013	2018
MMP9	4318	Craniosynostosis	C0010278	disease	Congenital, Hereditary, and Neonatal Diseases and Abnormalities; Musculoskeletal Diseases	Disease or Syndrome	488	90	0.07		1	7	0	2013	2019
MMP9	4318	Dry Eye Syndromes	C0013238	disease	Eye Diseases	Disease or Syndrome	156	1	0.07		1	7	0	2004	2019
MMP9	4318	Muscular Dystrophy, Duchenne	C0013264	disease	Congenital, Hereditary, and Neonatal Diseases and Abnormalities; Musculoskeletal Diseases; Nervous System Diseases	Disease or Syndrome	375	170	0.07		0.857	7	0	2009	2020
MMP9	4318	Glaucoma	C0017601	disease	Eye Diseases	Disease or Syndrome	770	198	0.07		1	7	2	2016	2020
MMP9	4318	Lymphatic Metastasis	C0024232	disease	Pathological Conditions, Signs and Symptoms; Neoplasms	Neoplastic Process	463	10	0.07		0.857	7	0	2005	2018
MMP9	4318	Lymphoma	C0024299	group	Neoplasms; Immune System Diseases; Hemic and Lymphatic Diseases	Neoplastic Process	1548	91	0.07		1	7	0	1993	2019
MMP9	4318	Respiratory Distress Syndrome, Adult	C0035222	disease	Respiratory Tract Diseases	Disease or Syndrome	434	60	0.07		1	7	0	2017	2019
MMP9	4318	Seizures	C0036572	phenotype	Pathological Conditions, Signs and Symptoms; Nervous System Diseases	Sign or Symptom	2152	553	0.07		1	7	0	2016	2019
MMP9	4318	Lip and Oral Cavity Carcinoma	C0220641	disease	Neoplasms; Stomatognathic Diseases	Neoplastic Process	734	172	0.07		1	7	0	2008	2019
MMP9	4318	Diabetic foot ulcer	C1456868	disease	Skin and Connective Tissue Diseases; Endocrine System Diseases; Cardiovascular Diseases	Disease or Syndrome	107	17	0.07		1	7	1	2013	2020
MMP9	4318	Head and Neck Carcinoma	C3887461	disease	Neoplasms	Neoplastic Process	786	118	0.07		0.714	7	0	2000	2013
MMP9	4318	Adenoma	C0001430	group	Neoplasms	Neoplastic Process	1183	103	0.06		1	6	0	1994	2015
MMP9	4318	Amyloidosis	C0002726	disease	Nutritional and Metabolic Diseases	Disease or Syndrome	694	93	0.06		1	6	0	2008	2020
MMP9	4318	Behcet Syndrome	C0004943	disease	Congenital, Hereditary, and Neonatal Diseases and Abnormalities; Eye Diseases; Skin and Connective Tissue Diseases; Stomatognathic Diseases; Cardiovascular Diseases	Disease or Syndrome	502	243	0.06		0.833	6	4	2010	2018
MMP9	4318	Brain Neoplasms	C0006118	group	Neoplasms; Nervous System Diseases	Neoplastic Process	1018	204	0.06		1	6	0	2004	2017
MMP9	4318	Crohn Disease	C0010346	disease	Digestive System Diseases	Disease or Syndrome	1382	1147	0.06		1	6	0	2007	2019
MMP9	4318	Keratoconus	C0022578	disease	Eye Diseases	Disease or Syndrome	269	83	0.06		0.833	6	1	2015	2020
MMP9	4318	Kidney Failure, Chronic	C0022661	disease	Female Urogenital Diseases and Pregnancy Complications; Male Urogenital Diseases	Disease or Syndrome	827	425	0.06		0.833	6	0	2003	2020
MMP9	4318	Neuralgia	C0027796	phenotype	Pathological Conditions, Signs and Symptoms; Nervous System Diseases	Sign or Symptom	767	16	0.06		1	6	0	2018	2019
MMP9	4318	Bullous pemphigoid	C0030805	disease	Skin and Connective Tissue Diseases; Immune System Diseases	Disease or Syndrome	127	11	0.06		1	6	0	1998	2019
MMP9	4318	Stomach Neoplasms	C0038356	group	Digestive System Diseases; Neoplasms	Neoplastic Process	820	55	0.06		1	6	0	2002	2008
MMP9	4318	Varicosity	C0042345	disease	Cardiovascular Diseases	Disease or Syndrome	188	51	0.06		1	6	0	2003	2020
MMP9	4318	Secondary malignant neoplasm of bone	C0153690	disease	Pathological Conditions, Signs and Symptoms; Neoplasms; Musculoskeletal Diseases	Neoplastic Process	647	18	0.06		1	6	0	2005	2020
MMP9	4318	Proliferative diabetic retinopathy	C0154830	disease	Pathological Conditions, Signs and Symptoms; Eye Diseases; Endocrine System Diseases; Cardiovascular Diseases	Disease or Syndrome	180	45	0.06		1	6	0	2008	2018
MMP9	4318	Age related macular degeneration	C0242383	disease	Eye Diseases	Disease or Syndrome	685	663	0.06		1	6	0	1998	2018
MMP9	4318	Laryngeal Squamous Cell Carcinoma	C0280324	disease	Neoplasms; Respiratory Tract Diseases; Otorhinolaryngologic Diseases	Neoplastic Process	504	30	0.06		0.833	6	0	2005	2019
MMP9	4318	Impaired cognition	C0338656	disease	Mental Disorders	Mental or Behavioral Dysfunction	1630	348	0.06		1	6	0	2017	2019
MMP9	4318	Aortic aneurysm without mention of rupture NOS	C0340629	disease	Cardiovascular Diseases	Disease or Syndrome	100	4	0.06		1	6	0	2013	2019
MMP9	4318	Sleep Apnea, Obstructive	C0520679	disease	Respiratory Tract Diseases; Nervous System Diseases	Disease or Syndrome	480	105	0.06		0.667	6	0	2013	2019
MMP9	4318	Endothelial dysfunction	C0856169	phenotype		Disease or Syndrome	716	25	0.06		1	6	0	2011	2018
MMP9	4318	Cardiomyopathy, Familial Idiopathic	C1449563	disease	Cardiovascular Diseases	Disease or Syndrome	773	243	0.06		1	6	0	2007	2019
MMP9	4318	Chronic Kidney Diseases	C1561643	group	Female Urogenital Diseases and Pregnancy Complications; Male Urogenital Diseases	Disease or Syndrome	1074	306	0.06		1	6	1	2012	2020
MMP9	4318	Malignant transformation	C1608408	phenotype		Neoplastic Process	1027	20	0.06		1	6	0	1996	2019
MMP9	4318	PIGMENTARY DISORDER, RETICULATE, WITH SYSTEMIC MANIFESTATIONS	C1845050	disease	Pathological Conditions, Signs and Symptoms; Congenital, Hereditary, and Neonatal Diseases and Abnormalities; Nutritional and Metabolic Diseases; Skin and Connective Tissue Diseases	Disease or Syndrome	209	37	0.06		1	6	0	2008	2018
MMP9	4318	Chronic kidney disease stage 5	C2316810	disease	Female Urogenital Diseases and Pregnancy Complications; Male Urogenital Diseases	Disease or Syndrome	666	194	0.06		0.833	6	0	2003	2020
MMP9	4318	Allergic rhinitis (disorder)	C2607914	disease	Respiratory Tract Diseases; Immune System Diseases; Otorhinolaryngologic Diseases	Disease or Syndrome	446	176	0.06		1	6	0	2005	2019
MMP9	4318	Amyotrophic Lateral Sclerosis	C0002736	disease	Nutritional and Metabolic Diseases; Nervous System Diseases	Disease or Syndrome	1114	485	0.05		1	5	0	2005	2019
MMP9	4318	Carotid Stenosis	C0007282	disease	Nervous System Diseases; Cardiovascular Diseases	Disease or Syndrome	135	19	0.05		1	5	0	2006	2019
MMP9	4318	Dermatitis	C0011603	disease	Skin and Connective Tissue Diseases	Disease or Syndrome	496	16	0.05		1	5	0	2006	2017
MMP9	4318	Epilepsy	C0014544	disease	Nervous System Diseases	Disease or Syndrome	1215	339	0.05		1	5	0	2016	2019
MMP9	4318	Heart Diseases	C0018799	group	Cardiovascular Diseases	Disease or Syndrome	537	45	0.05		1	5	0	2009	2017
MMP9	4318	Hepatitis B	C0019163	disease	Digestive System Diseases; Infections	Disease or Syndrome	1449	519	0.05		1	5	0	2002	2019
MMP9	4318	Hepatitis C	C0019196	disease	Digestive System Diseases; Infections	Disease or Syndrome	1768	347	0.05		1	5	0	2004	2016
MMP9	4318	leukemia	C0023418	disease	Neoplasms	Neoplastic Process	2111	144	0.05		1	5	0	2000	2015
MMP9	4318	Medulloblastoma	C0025149	disease	Neoplasms	Neoplastic Process	862	115	0.05		1	5	0	1998	2017
MMP9	4318	Meningitis	C0025289	disease	Nervous System Diseases	Disease or Syndrome	191	13	0.05		0.8	5	1	1999	2019
MMP9	4318	Parkinson Disease	C0030567	disease	Nervous System Diseases	Disease or Syndrome	2078	990	0.05		0.8	5	1	2010	2020
MMP9	4318	Pituitary Adenoma	C0032000	disease	Neoplasms; Nervous System Diseases; Endocrine System Diseases	Neoplastic Process	170	11	0.05		1	5	0	2007	2019
MMP9	4318	Pneumonia	C0032285	disease	Infections; Respiratory Tract Diseases	Disease or Syndrome	1032	33	0.05		1	5	0	2003	2019
MMP9	4318	Polycystic Ovary Syndrome	C0032460	disease	Neoplasms; Female Urogenital Diseases and Pregnancy Complications; Endocrine System Diseases	Disease or Syndrome	988	363	0.05		1	5	0	2006	2019
MMP9	4318	Giant Cell Arteritis	C0039483	disease	Skin and Connective Tissue Diseases; Immune System Diseases; Nervous System Diseases; Cardiovascular Diseases	Disease or Syndrome	260	78	0.05		1	5	3	1996	2018
MMP9	4318	Tuberculosis, Meningeal	C0041318	disease	Infections; Nervous System Diseases	Disease or Syndrome	68	10	0.05		1	5	0	2000	2020
MMP9	4318	Vascular Diseases	C0042373	group	Cardiovascular Diseases	Disease or Syndrome	688	40	0.05		1	5	0	2003	2017
MMP9	4318	Cataract	C0086543	disease	Eye Diseases	Acquired Abnormality	878	124	0.05		1	5	0	2005	2019
MMP9	4318	Left Ventricular Hypertrophy	C0149721	disease	Pathological Conditions, Signs and Symptoms; Cardiovascular Diseases	Disease or Syndrome	403	67	0.05		1	5	0	2009	2018
MMP9	4318	Primary Sjögren's syndrome	C0151449	disease	Eye Diseases; Skin and Connective Tissue Diseases; Musculoskeletal Diseases; Immune System Diseases; Stomatognathic Diseases	Disease or Syndrome	312	42	0.05		0.6	5	0	2004	2020
MMP9	4318	Lichen Planus, Oral	C0206139	disease	Skin and Connective Tissue Diseases; Stomatognathic Diseases	Disease or Syndrome	257	20	0.05		1	5	0	2001	2019
MMP9	4318	Gallbladder Carcinoma	C0235782	disease	Digestive System Diseases; Neoplasms	Neoplastic Process	498	75	0.05		0.8	5	2	2014	2019
MMP9	4318	Adult Meningioma	C0278877	disease	Neoplasms; Nervous System Diseases	Neoplastic Process	405	30	0.05		1	5	0	2007	2018
MMP9	4318	Malignant Head and Neck Neoplasm	C0278996	disease	Neoplasms	Neoplastic Process	767	118	0.05		0.6	5	0	2000	2013
MMP9	4318	Solid Neoplasm	C0280100	phenotype	Neoplasms	Neoplastic Process	1145	24	0.05		1	5	0	2003	2019
MMP9	4318	Squamous cell carcinoma of tongue	C0349566	disease	Neoplasms; Stomatognathic Diseases	Neoplastic Process	462	2	0.05		1	5	0	2012	2018
MMP9	4318	Thyroid carcinoma	C0549473	disease	Neoplasms; Endocrine System Diseases	Neoplastic Process	1175	145	0.05		1	5	0	1998	2019
MMP9	4318	Post MI	C0856742	phenotype	Pathological Conditions, Signs and Symptoms; Cardiovascular Diseases	Disease or Syndrome	203	4	0.05		1	5	0	2010	2019
MMP9	4318	Adult Lymphoma	C1332206	disease	Neoplasms; Immune System Diseases; Hemic and Lymphatic Diseases	Neoplastic Process	1169	66	0.05		1	5	0	1998	2019
MMP9	4318	Childhood Lymphoma	C1332979	disease	Neoplasms; Immune System Diseases; Hemic and Lymphatic Diseases	Neoplastic Process	1171	66	0.05		1	5	0	1998	2019
MMP9	4318	Benign Prostatic Hyperplasia	C1704272	disease	Male Urogenital Diseases	Disease or Syndrome	770	91	0.05		1	5	0	1994	2017
MMP9	4318	Meningioma, benign, no ICD-O subtype	C1762616	disease	Neoplasms; Nervous System Diseases	Neoplastic Process	404	30	0.05		1	5	0	2007	2018
MMP9	4318	Idiopathic Pulmonary Fibrosis	C1800706	disease	Respiratory Tract Diseases	Disease or Syndrome	803	63	0.05		1	5	0	1999	2017
MMP9	4318	ANOPHTHALMIA AND PULMONARY HYPOPLASIA	C1832661	disease	Congenital, Hereditary, and Neonatal Diseases and Abnormalities; Eye Diseases; Respiratory Tract Diseases	Disease or Syndrome	1410	80	0.05		1	5	0	2012	2019
MMP9	4318	Idiopathic pulmonary arterial hypertension	C3203102	disease	Respiratory Tract Diseases	Disease or Syndrome	776	24	0.05		1	5	0	2008	2019
MMP9	4318	MYELODYSPLASTIC SYNDROME	C3463824	group	Hemic and Lymphatic Diseases	Neoplastic Process	1033	95	0.05		1	5	1	2007	2019
MMP9	4318	Infection	C3714514	group	Infections	Pathologic Function	491	0	0.05		1	5	0	2002	2009
MMP9	4318	Ameloblastoma	C0002448	disease	Neoplasms	Neoplastic Process	174	4	0.04		1	4	0	2010	2018
MMP9	4318	Noninfiltrating Intraductal Carcinoma	C0007124	disease	Neoplasms	Neoplastic Process	486	13	0.04		1	4	0	2006	2014
MMP9	4318	Carcinoma, Transitional Cell	C0007138	disease	Neoplasms	Neoplastic Process	623	12	0.04		1	4	0	2001	2018
MMP9	4318	CNS disorder	C0007682	group	Nervous System Diseases	Disease or Syndrome	319	11	0.04		1	4	1	2018	2019
MMP9	4318	Chondrosarcoma	C0008479	disease	Neoplasms	Neoplastic Process	385	8	0.04		1	4	0	2009	2018
MMP9	4318	Mental Depression	C0011570	disease	Behavior and Behavior Mechanisms	Mental or Behavioral Dysfunction	1478	271	0.04		1	4	0	2016	2019
MMP9	4318	Depressive disorder	C0011581	disease	Mental Disorders	Mental or Behavioral Dysfunction	1719	297	0.04		1	4	0	2016	2019
MMP9	4318	Encephalomyelitis	C0014070	disease	Infections; Nervous System Diseases	Disease or Syndrome	865	7	0.04		1	4	0	2013	2019
MMP9	4318	Esophageal Neoplasms	C0014859	group	Digestive System Diseases; Neoplasms	Neoplastic Process	1254	270	0.04		1	4	0	2008	2018
MMP9	4318	Fever	C0015967	phenotype	Pathological Conditions, Signs and Symptoms	Sign or Symptom	1021	66	0.04		1	4	0	2013	2018
MMP9	4318	Hodgkin Disease	C0019829	disease	Neoplasms; Immune System Diseases; Hemic and Lymphatic Diseases	Neoplastic Process	900	148	0.04		1	4	0	1992	2002
MMP9	4318	Liver Cirrhosis	C0023890	disease	Pathological Conditions, Signs and Symptoms; Digestive System Diseases	Disease or Syndrome	1182	189	0.04		1	4	0	2005	2017
MMP9	4318	Mesothelioma	C0025500	disease	Neoplasms	Neoplastic Process	560	4	0.04		1	4	0	2007	2018
MMP9	4318	Multiple Myeloma	C0026764	disease	Neoplasms; Immune System Diseases; Hemic and Lymphatic Diseases; Cardiovascular Diseases	Neoplastic Process	1740	865	0.04		0.75	4	0	2007	2017
MMP9	4318	Myositis	C0027121	disease	Musculoskeletal Diseases; Nervous System Diseases	Disease or Syndrome	254	43	0.04		1	4	0	2005	2019
MMP9	4318	Osteopenia	C0029453	disease	Nutritional and Metabolic Diseases; Musculoskeletal Diseases	Disease or Syndrome	845	61	0.04		1	4	0	2017	2020
MMP9	4318	Osteoporosis	C0029456	disease	Nutritional and Metabolic Diseases; Musculoskeletal Diseases	Disease or Syndrome	1098	182	0.04		1	4	0	2017	2019
MMP9	4318	Periapical Granuloma	C0031029	disease	Stomatognathic Diseases	Disease or Syndrome	41	0	0.04		1	4	0	2016	2018
MMP9	4318	Periodontal Diseases	C0031090	group	Stomatognathic Diseases	Disease or Syndrome	326	22	0.04		1	4	0	2017	2020
MMP9	4318	polyps	C0032584	phenotype	Pathological Conditions, Signs and Symptoms	Anatomical Abnormality	390	18	0.04		0.75	4	0	2006	2012
MMP9	4318	Retinoblastoma	C0035335	disease	Neoplasms; Eye Diseases	Neoplastic Process	853	193	0.04		1	4	0	2013	2019
MMP9	4318	Thyroid Neoplasm	C0040136	disease	Neoplasms; Endocrine System Diseases	Neoplastic Process	1164	135	0.04		1	4	0	2007	2017
MMP9	4318	Chagas Disease	C0041234	disease	Infections	Disease or Syndrome	202	10	0.04		0.75	4	0	2013	2019
MMP9	4318	Virus Diseases	C0042769	group	Infections	Disease or Syndrome	1471	42	0.04		1	4	0	2004	2018
MMP9	4318	Corneal Neovascularization	C0085109	disease	Pathological Conditions, Signs and Symptoms; Eye Diseases	Disease or Syndrome	117	0	0.04		1	4	0	2017	2019
MMP9	4318	Chronic sinusitis	C0149516	disease	Infections; Respiratory Tract Diseases; Otorhinolaryngologic Diseases	Disease or Syndrome	205	6	0.04		1	4	0	2010	2018
MMP9	4318	Esophageal carcinoma	C0152018	disease	Digestive System Diseases; Neoplasms	Neoplastic Process	1287	272	0.04		1	4	0	2014	2018
MMP9	4318	Malignant neoplasm of gallbladder	C0153452	disease	Digestive System Diseases; Neoplasms	Neoplastic Process	425	81	0.04		0.75	4	2	2014	2019
MMP9	4318	Childhood asthma	C0264408	disease	Respiratory Tract Diseases; Immune System Diseases	Disease or Syndrome	303	317	0.04		0.75	4	0	2010	2018
MMP9	4318	Tuberculosis, Central Nervous System	C0275904	disease	Infections; Nervous System Diseases	Disease or Syndrome	11	0	0.04		1	4	0	2007	2018
MMP9	4318	Childhood Medulloblastoma	C0278510	disease	Neoplasms	Neoplastic Process	771	25	0.04		1	4	0	2007	2017
MMP9	4318	Adult Medulloblastoma	C0278876	disease	Neoplasms	Neoplastic Process	762	24	0.04		1	4	0	2007	2017
MMP9	4318	Dryness of eye	C0314719	phenotype	Eye Diseases	Sign or Symptom	149	1	0.04		1	4	0	2015	2019
MMP9	4318	Depressed mood	C0344315	phenotype	Behavior and Behavior Mechanisms	Mental or Behavioral Dysfunction	1461	269	0.04		1	4	0	2016	2019
MMP9	4318	Malignant neoplasm of liver	C0345904	disease	Digestive System Diseases; Neoplasms	Neoplastic Process	1649	88	0.04		1	4	0	2011	2017
MMP9	4318	Recurrent tumor	C0521158	phenotype		Neoplastic Process	735	33	0.04		1	4	0	2012	2018
MMP9	4318	Metabolic Syndrome X	C0524620	disease	Nutritional and Metabolic Diseases	Disease or Syndrome	1125	591	0.04		0.75	4	0	2009	2018
MMP9	4318	Malignant neoplasm of esophagus	C0546837	disease	Digestive System Diseases; Neoplasms	Neoplastic Process	1286	214	0.04		0.75	4	0	2010	2018
MMP9	4318	Maternal hypertension	C0565599	disease	Female Urogenital Diseases and Pregnancy Complications; Cardiovascular Diseases	Disease or Syndrome	52	22	0.04		1	4	0	2017	2020
MMP9	4318	Carotid Atherosclerosis	C0577631	disease	Nervous System Diseases; Cardiovascular Diseases	Disease or Syndrome	219	79	0.04		1	4	0	2006	2014
MMP9	4318	Carcinoma of larynx	C0595989	disease	Neoplasms; Respiratory Tract Diseases; Otorhinolaryngologic Diseases	Neoplastic Process	456	65	0.04		1	4	0	2008	2019
MMP9	4318	Hyperhomocysteinemia	C0598608	disease	Congenital, Hereditary, and Neonatal Diseases and Abnormalities; Nutritional and Metabolic Diseases	Disease or Syndrome	246	45	0.04		1	4	0	2001	2019
MMP9	4318	Epithelial ovarian cancer	C0677886	disease	Neoplasms; Female Urogenital Diseases and Pregnancy Complications; Endocrine System Diseases	Neoplastic Process	1224	129	0.04		1	4	0	2013	2019
MMP9	4318	Malignant Pleural Mesothelioma	C0812413	disease	Neoplasms; Respiratory Tract Diseases	Neoplastic Process	421	15	0.04		1	4	0	2005	2012
MMP9	4318	Hormone refractory prostate cancer	C1328504	disease	Neoplasms; Male Urogenital Diseases	Neoplastic Process	683	29	0.04		1	4	0	2012	2020
MMP9	4318	Sjogren's Syndrome	C1527336	disease	Eye Diseases; Skin and Connective Tissue Diseases; Musculoskeletal Diseases; Immune System Diseases; Stomatognathic Diseases	Disease or Syndrome	481	47	0.04		1	4	0	1997	2019
MMP9	4318	ST segment elevation myocardial infarction	C1536220	disease	Pathological Conditions, Signs and Symptoms; Cardiovascular Diseases	Disease or Syndrome	264	16	0.04		1	4	0	2014	2019
MMP9	4318	Renal Insufficiency	C1565489	disease	Female Urogenital Diseases and Pregnancy Complications; Male Urogenital Diseases	Disease or Syndrome	615	42	0.04		1	4	0	2006	2020
MMP9	4318	Influenza A	C2062441	disease		Disease or Syndrome	563	19	0.04		1	4	0	2012	2018
MMP9	4318	Neutrophilia (disorder)	C3665444	disease	Pathological Conditions, Signs and Symptoms; Hemic and Lymphatic Diseases	Disease or Syndrome	150	1	0.04		1	4	0	2008	2020
MMP9	4318	PACHYONYCHIA CONGENITA 3	C3714948	disease		Disease or Syndrome	209	20	0.04		1	4	0	2005	2015
MMP9	4318	Inflammatory dermatosis	C3875321	disease	Skin and Connective Tissue Diseases	Disease or Syndrome	382	6	0.04		1	4	0	2008	2017
MMP9	4318	Stage 0 Gallbladder Cancer AJCC v8	C4525297	disease		Neoplastic Process	367	56	0.04		0.75	4	2	2014	2019
MMP9	4318	Stage IIA Gallbladder Cancer AJCC v8	C4525300	disease		Neoplastic Process	367	56	0.04		0.75	4	2	2014	2019
MMP9	4318	Stage IIB Gallbladder Cancer AJCC v8	C4525301	disease		Neoplastic Process	367	56	0.04		0.75	4	2	2014	2019
MMP9	4318	Stage III Gallbladder Cancer AJCC v8	C4525302	disease		Neoplastic Process	367	56	0.04		0.75	4	2	2014	2019
MMP9	4318	Stage IV Gallbladder Cancer AJCC v8	C4525305	disease		Neoplastic Process	367	56	0.04		0.75	4	2	2014	2019
MMP9	4318	Bone Diseases	C0005940	group	Musculoskeletal Diseases	Disease or Syndrome	317	10	0.03		0.667	3	0	2004	2019
MMP9	4318	Bronchopulmonary Dysplasia	C0006287	disease	Congenital, Hereditary, and Neonatal Diseases and Abnormalities; Respiratory Tract Diseases	Disease or Syndrome	423	112	0.03		1	3	0	2002	2009
MMP9	4318	Malignant neoplasm of larynx	C0007107	disease	Neoplasms; Respiratory Tract Diseases; Otorhinolaryngologic Diseases	Neoplastic Process	349	50	0.03		1	3	0	2008	2019
MMP9	4318	Cutis Laxa	C0010495	disease	Congenital, Hereditary, and Neonatal Diseases and Abnormalities; Skin and Connective Tissue Diseases	Disease or Syndrome	70	21	0.03		1	3	0	1998	2009
MMP9	4318	Cyst	C0010709	disease	Pathological Conditions, Signs and Symptoms; Neoplasms	Disease or Syndrome	221	6	0.03		1	3	0	2005	2017
MMP9	4318	Dementia, Vascular	C0011269	disease	Nervous System Diseases; Mental Disorders; Cardiovascular Diseases	Disease or Syndrome	212	32	0.03		1	3	0	2006	2017
MMP9	4318	Diabetic Ketoacidosis	C0011880	disease	Nutritional and Metabolic Diseases; Endocrine System Diseases	Disease or Syndrome	63	3	0.03		1	3	0	2016	2019
MMP9	4318	Eclampsia	C0013537	disease	Female Urogenital Diseases and Pregnancy Complications	Disease or Syndrome	241	38	0.03		0.667	3	0	2008	2019
MMP9	4318	Endometrial Neoplasms	C0014170	group	Neoplasms; Female Urogenital Diseases and Pregnancy Complications	Neoplastic Process	261	32	0.03		1	3	0	2002	2007
MMP9	4318	Fetal Growth Retardation	C0015934	phenotype	Pathological Conditions, Signs and Symptoms; Congenital, Hereditary, and Neonatal Diseases and Abnormalities; Female Urogenital Diseases and Pregnancy Complications	Disease or Syndrome	1037	21	0.03		1	3	0	2007	2017
MMP9	4318	Breast Fibrocystic Disease	C0016034	disease	Skin and Connective Tissue Diseases	Disease or Syndrome	114	12	0.03		1	3	0	2008	2020
MMP9	4318	Gingivitis	C0017574	disease	Infections; Stomatognathic Diseases	Disease or Syndrome	152	3	0.03		1	3	0	2009	2018
MMP9	4318	IGA Glomerulonephritis	C0017661	disease	Female Urogenital Diseases and Pregnancy Complications; Male Urogenital Diseases; Immune System Diseases	Disease or Syndrome	456	130	0.03		1	3	0	1996	2017
MMP9	4318	Myocardial rupture	C0018813	disease	Cardiovascular Diseases	Disease or Syndrome	14	0	0.03		1	3	0	2018	2019
MMP9	4318	Hyperlipidemia	C0020473	disease	Nutritional and Metabolic Diseases	Disease or Syndrome	472	83	0.03		1	3	0	2017	2018
MMP9	4318	Liver neoplasms	C0023903	group	Digestive System Diseases; Neoplasms	Neoplastic Process	1424	7	0.03		1	3	0	2012	2015
MMP9	4318	Mouth Neoplasms	C0026640	group	Neoplasms; Stomatognathic Diseases	Neoplastic Process	140	0	0.03		1	3	0	2008	2018
MMP9	4318	Moyamoya Disease	C0026654	disease	Nervous System Diseases; Cardiovascular Diseases	Disease or Syndrome	117	50	0.03		1	3	1	2014	2018
MMP9	4318	Myopathy	C0026848	group	Musculoskeletal Diseases; Nervous System Diseases	Disease or Syndrome	634	166	0.03		1	3	0	2009	2014
MMP9	4318	Peripheral Neuropathy	C0031117	group	Nervous System Diseases	Disease or Syndrome	351	81	0.03		1	3	0	2003	2019
MMP9	4318	Pterygium	C0033999	disease	Eye Diseases	Disease or Syndrome	216	5	0.03		1	3	0	2009	2020
MMP9	4318	Radicular Cyst	C0034543	disease	Neoplasms; Musculoskeletal Diseases; Stomatognathic Diseases	Disease or Syndrome	63	0	0.03		1	3	0	2016	2017
MMP9	4318	Stress, Psychological	C0038443	disease	Behavior and Behavior Mechanisms	Mental or Behavioral Dysfunction	199	24	0.03		1	3	0	2018	2019
MMP9	4318	Tuberculosis, Pulmonary	C0041327	disease	Infections; Respiratory Tract Diseases	Disease or Syndrome	358	171	0.03		1	3	0	2009	2018
MMP9	4318	Polymyositis	C0085655	disease	Musculoskeletal Diseases; Nervous System Diseases	Disease or Syndrome	183	22	0.03		1	3	0	2001	2016
MMP9	4318	Bicuspid aortic valve	C0149630	disease	Cardiovascular Diseases	Congenital Abnormality	154	23	0.03		1	3	0	2009	2017
MMP9	4318	Cyclical vomiting syndrome (disorder)	C0152164	disease	Pathological Conditions, Signs and Symptoms	Disease or Syndrome	28	4	0.03		1	3	0	2013	2018
MMP9	4318	Malignant neoplasm of nasopharynx	C0153392	disease	Neoplasms; Stomatognathic Diseases; Otorhinolaryngologic Diseases	Neoplastic Process	136	10	0.03		1	3	0	2007	2014
MMP9	4318	Corneal pannus	C0155094	disease	Pathological Conditions, Signs and Symptoms; Eye Diseases	Disease or Syndrome	66	0	0.03		1	3	0	2013	2019
MMP9	4318	Allergic asthma	C0155877	disease	Respiratory Tract Diseases; Immune System Diseases	Disease or Syndrome	371	55	0.03		1	3	2	2006	2017
MMP9	4318	Intervertebral Disc Degeneration	C0158266	disease	Musculoskeletal Diseases	Disease or Syndrome	342	47	0.03		1	3	1	2009	2017
MMP9	4318	Gastrointestinal Carcinoid Tumor	C0220620	disease	Digestive System Diseases; Neoplasms; Endocrine System Diseases	Neoplastic Process	323	13	0.03		1	3	0	1997	2003
MMP9	4318	Metastatic malignant neoplasm to brain	C0220650	disease	Pathological Conditions, Signs and Symptoms; Neoplasms; Nervous System Diseases	Neoplastic Process	392	28	0.03		1	3	0	2015	2019
MMP9	4318	Fibrillation	C0232197	disease	Pathological Conditions, Signs and Symptoms; Cardiovascular Diseases	Disease or Syndrome	118	8	0.03		0.667	3	0	1997	2016
MMP9	4318	Cancer of Nasopharynx	C0238301	disease	Neoplasms; Stomatognathic Diseases; Otorhinolaryngologic Diseases	Neoplastic Process	145	12	0.03		1	3	0	2007	2014
MMP9	4318	Anaplastic thyroid carcinoma	C0238461	disease	Neoplasms	Neoplastic Process	392	16	0.03		1	3	0	2013	2018
MMP9	4318	acute aortic dissection	C0241868	disease	Cardiovascular Diseases	Disease or Syndrome	63	0	0.03		1	3	0	2017	2020
MMP9	4318	Cholestasis of pregnancy	C0268318	disease	Digestive System Diseases; Female Urogenital Diseases and Pregnancy Complications	Disease or Syndrome	100	24	0.03		1	3	0	2017	2020
MMP9	4318	Endometrioma	C0269102	disease	Female Urogenital Diseases and Pregnancy Complications	Neoplastic Process	279	4	0.03		1	3	0	2002	2018
MMP9	4318	Carcinoma breast stage IV	C0278488	disease		Neoplastic Process	573	14	0.03		1	3	0	2013	2017
MMP9	4318	Metastatic osteosarcoma	C0278512	disease	Neoplasms	Neoplastic Process	51	5	0.03		1	3	0	2016	2018
MMP9	4318	Healing ulcer	C0333293	disease	Pathological Conditions, Signs and Symptoms	Acquired Abnormality	43	1	0.03		1	3	0	2017	2019
MMP9	4318	Tumor necrosis	C0333516	phenotype	Pathological Conditions, Signs and Symptoms	Neoplastic Process	350	1	0.03		1	3	0	2010	2012
MMP9	4318	Endometriosis of uterus	C0341858	disease	Female Urogenital Diseases and Pregnancy Complications	Disease or Syndrome	154	4	0.03		0.333	3	1	2006	2018
MMP9	4318	Respiratory syncytial virus (RSV) infection in conditions classified elsewhere and of unspecified site	C0375023	disease		Disease or Syndrome	467	14	0.03		1	3	0	2007	2019
MMP9	4318	Hepatitis B, Chronic	C0524909	disease	Digestive System Diseases; Infections	Disease or Syndrome	415	84	0.03		1	3	0	2007	2018
MMP9	4318	Malignant Glioma	C0555198	disease	Neoplasms	Neoplastic Process	724	22	0.03		1	3	0	1996	2010
MMP9	4318	Community acquired pneumonia	C0694549	disease	Infections; Respiratory Tract Diseases	Disease or Syndrome	75	13	0.03		1	3	0	2011	2013
MMP9	4318	Acute Cerebrovascular Accidents	C0751956	disease	Nervous System Diseases; Cardiovascular Diseases	Disease or Syndrome	155	2	0.03		1	3	0	2012	2013
MMP9	4318	Invasive carcinoma of breast	C0853879	disease	Neoplasms; Skin and Connective Tissue Diseases	Neoplastic Process	473	21	0.03		1	3	0	2001	2013
MMP9	4318	Pelvic Organ Prolapse	C0877015	disease	Pathological Conditions, Signs and Symptoms	Disease or Syndrome	119	49	0.03		1	3	1	2008	2017
MMP9	4318	Invasive Ductal Breast Carcinoma	C1134719	disease	Neoplasms; Skin and Connective Tissue Diseases	Neoplastic Process	414	16	0.03		1	3	0	2013	2017
MMP9	4318	Sarcoma	C1261473	group	Neoplasms	Neoplastic Process	853	42	0.03		1	3	0	2006	2014
MMP9	4318	Childhood Leukemia	C1332977	disease	Neoplasms	Neoplastic Process	1740	140	0.03		1	3	0	2012	2015
MMP9	4318	Neoplasms, Intracranial	C1527390	group	Neoplasms; Nervous System Diseases	Neoplastic Process	157	4	0.03		1	3	0	2004	2017
MMP9	4318	tumor vasculature	C1658953	phenotype		Neoplastic Process	200	0	0.03		1	3	0	2005	2017
MMP9	4318	Intrauterine adhesions	C1704274	disease	Female Urogenital Diseases and Pregnancy Complications	Disease or Syndrome	24	0	0.03		1	3	0	2018	2019
MMP9	4318	Carcinoma of urinary bladder, invasive	C1827293	disease	Neoplasms; Female Urogenital Diseases and Pregnancy Complications; Male Urogenital Diseases	Neoplastic Process	287	14	0.03		1	3	0	2006	2012
MMP9	4318	Pterygium Of Conjunctiva And Cornea	C1867441	disease	Eye Diseases	Disease or Syndrome	169	4	0.03		1	3	0	2009	2020
MMP9	4318	PNEUMOTHORAX, PRIMARY SPONTANEOUS	C1868193	disease		Disease or Syndrome	46	15	0.03		1	3	0	2014	2018
MMP9	4318	B-CELL MALIGNANCY, LOW-GRADE	C1868683	disease		Neoplastic Process	350	19	0.03		1	3	0	2006	2010
MMP9	4318	Tubulointerstitial fibrosis	C1969372	phenotype		Disease or Syndrome	328	0	0.03		1	3	0	2007	2018
MMP9	4318	Moyamoya disease 1	C2931384	disease	Nervous System Diseases; Cardiovascular Diseases	Disease or Syndrome	92	50	0.03		1	3	1	2014	2018
MMP9	4318	Mechanical Allodynia	C2936719	phenotype	Pathological Conditions, Signs and Symptoms; Nervous System Diseases	Sign or Symptom	408	4	0.03		1	3	0	2018	2019
MMP9	4318	Aortic Stiffness	C3178782	phenotype		Disease or Syndrome	61	11	0.03		1	3	0	2007	2018
MMP9	4318	Juvenile arthritis	C3495559	disease	Skin and Connective Tissue Diseases; Musculoskeletal Diseases; Immune System Diseases	Disease or Syndrome	450	128	0.03		1	3	0	2010	2019
MMP9	4318	Pneumonitis	C3714636	disease	Infections; Respiratory Tract Diseases	Disease or Syndrome	697	13	0.03		1	3	0	2009	2019
MMP9	4318	Experimental Organism Basal Cell Carcinoma	C3811653	phenotype	Neoplasms	Neoplastic Process	437	63	0.03		1	3	0	1992	2016
MMP9	4318	Human immunodeficiency virus (HIV) II infection category B1	C3854222	disease		Disease or Syndrome	985	56	0.03		1	3	0	2011	2018
MMP9	4318	Peripheral neuropathy due to and following chemotherapy	C3873567	disease	Nervous System Diseases	Disease or Syndrome	72	10	0.03		1	3	0	2019	2020
MMP9	4318	Pterygium of eye	C4520843	disease	Eye Diseases	Disease or Syndrome	169	4	0.03		1	3	0	2009	2020
MMP9	4318	Carcinoma, Basal Cell	C4721806	disease	Neoplasms	Neoplastic Process	557	91	0.03		1	3	0	1992	2016
MMP9	4318	Acute pancreatitis	C0001339	disease	Digestive System Diseases	Disease or Syndrome	435	51	0.02		1	2	0	2019	2019
MMP9	4318	AIDS Dementia Complex	C0001849	disease	Infections; Immune System Diseases; Nervous System Diseases; Mental Disorders	Disease or Syndrome	45	4	0.02		1	2	0	2000	2009
MMP9	4318	Airway Obstruction	C0001883	group	Respiratory Tract Diseases	Disease or Syndrome	110	5	0.02		1	2	0	2014	2018
MMP9	4318	Aneurysm	C0002940	disease	Cardiovascular Diseases	Pathologic Function	22	36	0.02		1	2	0	2006	2008
MMP9	4318	Aneurysm, Dissecting	C0002949	disease	Cardiovascular Diseases	Disease or Syndrome	33	4	0.02		0.5	2	0	2004	2019
MMP9	4318	Anoxia	C0003130	phenotype	Pathological Conditions, Signs and Symptoms	Pathologic Function	287	0	0.02		1	2	0	2005	2008
MMP9	4318	Anxiety Disorders	C0003469	group	Mental Disorders	Mental or Behavioral Dysfunction	840	163	0.02		1	2	1	2017	2018
MMP9	4318	Congenital arteriovenous malformation	C0003857	disease	Congenital, Hereditary, and Neonatal Diseases and Abnormalities; Cardiovascular Diseases	Congenital Abnormality	163	23	0.02		1	2	1	2012	2014
MMP9	4318	Ataxia Telangiectasia	C0004135	disease	Congenital, Hereditary, and Neonatal Diseases and Abnormalities; Nutritional and Metabolic Diseases; Immune System Diseases; Nervous System Diseases; Cardiovascular Diseases	Disease or Syndrome	384	698	0.02		1	2	0	2013	2018
MMP9	4318	Bacterial Infections	C0004623	group	Infections	Disease or Syndrome	616	17	0.02		1	2	0	2010	2017
MMP9	4318	Blast Phase	C0005699	disease	Pathological Conditions, Signs and Symptoms; Neoplasms; Hemic and Lymphatic Diseases	Neoplastic Process	299	14	0.02		1	2	0	2014	2016
MMP9	4318	Brain Diseases	C0006111	group	Nervous System Diseases	Disease or Syndrome	345	10	0.02		1	2	0	2016	2017
MMP9	4318	Bronchiectasis	C0006267	disease	Respiratory Tract Diseases	Disease or Syndrome	190	15	0.02		1	2	0	2003	2009
MMP9	4318	Adenocarcinoma of prostate	C0007112	disease	Neoplasms; Male Urogenital Diseases	Neoplastic Process	342	108	0.02		1	2	0	1994	2019
MMP9	4318	Rectal Carcinoma	C0007113	disease	Digestive System Diseases; Neoplasms	Neoplastic Process	472	112	0.02		1	2	0	2009	2018
MMP9	4318	Malignant neoplasm of thyroid	C0007115	disease	Neoplasms; Endocrine System Diseases	Neoplastic Process	949	103	0.02		1	2	0	2013	2017
MMP9	4318	Cardiomyopathy, Dilated	C0007193	group	Cardiovascular Diseases	Disease or Syndrome	512	509	0.02		1	2	0	2007	2019
MMP9	4318	Hypertrophic Cardiomyopathy	C0007194	disease	Cardiovascular Diseases	Disease or Syndrome	560	635	0.02		1	2	0	2017	2018
MMP9	4318	Carotid Artery Diseases	C0007273	group	Nervous System Diseases; Cardiovascular Diseases	Disease or Syndrome	69	6	0.02		1	2	0	2007	2008
MMP9	4318	Cerebrovascular Disorders	C0007820	group	Nervous System Diseases; Cardiovascular Diseases	Disease or Syndrome	233	56	0.02		1	2	0	2010	2011
MMP9	4318	Cholesteatoma	C0008373	disease	Skin and Connective Tissue Diseases	Disease or Syndrome	135	1	0.02		1	2	0	2018	2020
MMP9	4318	Choriocarcinoma	C0008497	disease	Neoplasms; Female Urogenital Diseases and Pregnancy Complications	Neoplastic Process	431	2	0.02		1	2	0	2012	2013
MMP9	4318	Cleft upper lip	C0008924	disease	Congenital, Hereditary, and Neonatal Diseases and Abnormalities; Stomatognathic Diseases	Congenital Abnormality	255	282	0.02		1	2	0	2007	2019
MMP9	4318	Febrile Convulsions	C0009952	disease	Pathological Conditions, Signs and Symptoms; Nervous System Diseases	Disease or Syndrome	192	65	0.02		1	2	0	2008	2011
MMP9	4318	Coronary Aneurysm	C0010051	disease	Cardiovascular Diseases	Disease or Syndrome	75	17	0.02		0.5	2	0	2002	2003
MMP9	4318	Adenoid Cystic Carcinoma	C0010606	disease	Neoplasms	Neoplastic Process	325	30	0.02		1	2	0	2006	2018
MMP9	4318	Pressure Ulcer	C0011127	disease	Skin and Connective Tissue Diseases	Disease or Syndrome	49	1	0.02		1	2	0	2016	2018
MMP9	4318	Presenile dementia	C0011265	disease	Nervous System Diseases; Mental Disorders	Mental or Behavioral Dysfunction	718	159	0.02		1	2	0	2003	2018
MMP9	4318	Dermatomyositis	C0011633	disease	Skin and Connective Tissue Diseases; Musculoskeletal Diseases; Nervous System Diseases	Disease or Syndrome	235	34	0.02		1	2	0	2001	2005
MMP9	4318	Diabetes Mellitus, Insulin-Dependent	C0011854	disease	Nutritional and Metabolic Diseases; Immune System Diseases; Endocrine System Diseases	Disease or Syndrome	1675	954	0.02		1	2	0	2010	2018
MMP9	4318	Down Syndrome	C0013080	disease	Congenital, Hereditary, and Neonatal Diseases and Abnormalities; Nervous System Diseases	Disease or Syndrome	766	80	0.02		1	2	0	2004	2018
MMP9	4318	Eczema	C0013595	disease	Skin and Connective Tissue Diseases	Disease or Syndrome	863	368	0.02		1	2	0	2017	2018
MMP9	4318	Edema	C0013604	phenotype	Pathological Conditions, Signs and Symptoms	Pathologic Function	126	1	0.02		1	2	0	2006	2006
MMP9	4318	Encephalitis	C0014038	disease	Nervous System Diseases	Disease or Syndrome	324	18	0.02		1	2	0	2011	2019
MMP9	4318	Epilepsy, Temporal Lobe	C0014556	disease	Nervous System Diseases	Disease or Syndrome	354	33	0.02		1	2	0	2010	2018
MMP9	4318	Erythema Chronicum Migrans	C0014740	disease	Infections; Skin and Connective Tissue Diseases	Disease or Syndrome	41	0	0.02		1	2	0	2003	2007
MMP9	4318	Fanconi Anemia	C0015625	disease	Congenital, Hereditary, and Neonatal Diseases and Abnormalities; Nutritional and Metabolic Diseases; Hemic and Lymphatic Diseases	Disease or Syndrome	394	173	0.02		1	2	0	2015	2017
MMP9	4318	Gastritis	C0017152	disease	Digestive System Diseases	Disease or Syndrome	292	21	0.02		1	2	0	2003	2010
MMP9	4318	Giant Cell Tumors	C0017525	group	Neoplasms	Neoplastic Process	76	3	0.02		1	2	0	1997	2001
MMP9	4318	Glossitis, Benign Migratory	C0017677	disease	Stomatognathic Diseases	Disease or Syndrome	53	1	0.02		1	2	0	2003	2007
MMP9	4318	Hypercholesterolemia, Familial	C0020445	disease	Congenital, Hereditary, and Neonatal Diseases and Abnormalities; Nutritional and Metabolic Diseases	Disease or Syndrome	203	1423	0.02		1	2	0	2006	2013
MMP9	4318	Male infertility	C0021364	phenotype	Male Urogenital Diseases	Disease or Syndrome	516	146	0.02		1	2	0	2017	2019
MMP9	4318	Influenza	C0021400	disease	Infections; Respiratory Tract Diseases	Disease or Syndrome	858	17	0.02		1	2	0	2012	2017
MMP9	4318	Keratoconjunctivitis Sicca	C0022575	disease	Eye Diseases	Disease or Syndrome	90	3	0.02		1	2	0	2004	2019
MMP9	4318	Kidney Calculi	C0022650	disease	Pathological Conditions, Signs and Symptoms; Female Urogenital Diseases and Pregnancy Complications; Male Urogenital Diseases	Disease or Syndrome	190	71	0.02		1	2	1	2017	2018
MMP9	4318	Kidney Failure, Acute	C0022660	disease	Female Urogenital Diseases and Pregnancy Complications; Male Urogenital Diseases	Disease or Syndrome	826	32	0.02		1	2	0	2018	2019
MMP9	4318	Kidney Neoplasm	C0022665	disease	Neoplasms; Female Urogenital Diseases and Pregnancy Complications; Male Urogenital Diseases	Neoplastic Process	295	11	0.02		1	2	0	2001	2007
MMP9	4318	Acute lymphocytic leukemia	C0023449	disease	Neoplasms; Immune System Diseases; Hemic and Lymphatic Diseases	Neoplastic Process	1293	222	0.02		1	2	0	2007	2018
MMP9	4318	Leukemia, T-Cell	C0023492	disease	Neoplasms; Immune System Diseases; Hemic and Lymphatic Diseases	Neoplastic Process	457	10	0.02		1	2	0	2002	2014
MMP9	4318	Adult T-Cell Lymphoma/Leukemia	C0023493	disease	Neoplasms; Immune System Diseases; Hemic and Lymphatic Diseases	Neoplastic Process	540	11	0.02		1	2	0	2002	2014
MMP9	4318	Leukocytosis	C0023518	phenotype	Pathological Conditions, Signs and Symptoms; Hemic and Lymphatic Diseases	Disease or Syndrome	168	4	0.02		1	2	0	2002	2011
MMP9	4318	Leukoplakia, Oral	C0023532	disease	Pathological Conditions, Signs and Symptoms; Neoplasms; Stomatognathic Diseases	Neoplastic Process	144	6	0.02		1	2	0	2008	2018
MMP9	4318	Lipoid Proteinosis of Urbach and Wiethe	C0023795	disease	Congenital, Hereditary, and Neonatal Diseases and Abnormalities; Respiratory Tract Diseases	Disease or Syndrome	5	16	0.02		1	2	0	2006	2015
MMP9	4318	Lupus Vulgaris	C0024131	disease	Infections; Skin and Connective Tissue Diseases	Disease or Syndrome	526	44	0.02		1	2	0	2015	2016
MMP9	4318	Lupus Erythematosus, Discoid	C0024138	disease	Skin and Connective Tissue Diseases	Disease or Syndrome	552	46	0.02		1	2	0	2015	2016
MMP9	4318	Lymphoma, Non-Hodgkin	C0024305	disease	Neoplasms; Immune System Diseases; Hemic and Lymphatic Diseases	Neoplastic Process	733	197	0.02		1	2	0	2007	2008
MMP9	4318	Mycetoma	C0024449	disease	Infections; Skin and Connective Tissue Diseases	Disease or Syndrome	19	0	0.02		1	2	0	2014	2019
MMP9	4318	Malaria	C0024530	disease	Infections	Disease or Syndrome	685	148	0.02		1	2	0	2015	2019
MMP9	4318	Malaria, Falciparum	C0024535	disease	Infections	Disease or Syndrome	158	19	0.02		1	2	0	2005	2011
MMP9	4318	Viral meningitis	C0025297	disease	Infections; Nervous System Diseases	Disease or Syndrome	14	0	0.02		1	2	0	2001	2008
MMP9	4318	Mixed Salivary Gland Tumor	C0026277	disease	Neoplasms	Neoplastic Process	185	3	0.02		1	2	0	2009	2015
MMP9	4318	Dental Fluorosis, Acquired	C0026618	disease	Stomatognathic Diseases	Disease or Syndrome	62	10	0.02		1	2	0	2019	2019
MMP9	4318	Myocarditis	C0027059	disease	Cardiovascular Diseases	Disease or Syndrome	285	2	0.02		1	2	0	2008	2010
MMP9	4318	Myopia	C0027092	disease	Eye Diseases	Disease or Syndrome	490	167	0.02		1	2	1	2009	2012
MMP9	4318	nervous system disorder	C0027765	group	Nervous System Diseases	Disease or Syndrome	977	39	0.02		1	2	0	2017	2018
MMP9	4318	Otitis Media with Effusion	C0029883	disease	Otorhinolaryngologic Diseases	Disease or Syndrome	110	1	0.02		1	2	0	2006	2020
MMP9	4318	Pain, Postoperative	C0030201	phenotype	Pathological Conditions, Signs and Symptoms	Sign or Symptom	102	14	0.02		1	2	0	2018	2019
MMP9	4318	Peyronie Disease	C0030848	disease	Skin and Connective Tissue Diseases; Male Urogenital Diseases	Disease or Syndrome	41	1	0.02		1	2	0	2004	2019
MMP9	4318	Polycythemia Vera	C0032463	disease	Neoplasms; Hemic and Lymphatic Diseases	Neoplastic Process	291	38	0.02		0.5	2	1	2015	2015
MMP9	4318	Pre-Eclampsia	C0032914	phenotype	Female Urogenital Diseases and Pregnancy Complications	Pathologic Function	166	14	0.02		1	2	0	2007	2008
MMP9	4318	Prolactinoma	C0033375	disease	Neoplasms; Nervous System Diseases; Endocrine System Diseases	Neoplastic Process	187	6	0.02		0.5	2	0	2015	2016
MMP9	4318	Psoriasis	C0033860	disease	Skin and Connective Tissue Diseases	Disease or Syndrome	1308	705	0.02		0.5	2	0	2001	2018
MMP9	4318	Retinitis Pigmentosa	C0035334	disease	Congenital, Hereditary, and Neonatal Diseases and Abnormalities; Eye Diseases	Disease or Syndrome	546	541	0.02		1	2	0	2018	2018
MMP9	4318	Rhabdomyosarcoma	C0035412	disease	Neoplasms	Neoplastic Process	565	20	0.02		1	2	0	2013	2014
MMP9	4318	Skin lesion	C0037284	group	Skin and Connective Tissue Diseases	Disease or Syndrome	563	52	0.02		1	2	0	2003	2007
MMP9	4318	Spinal Cord Neoplasms	C0037930	group	Neoplasms; Nervous System Diseases	Neoplastic Process	27	1	0.02		1	2	0	2017	2019
MMP9	4318	synovial sarcoma	C0039101	disease	Neoplasms	Neoplastic Process	299	4	0.02		1	2	0	2013	2019
MMP9	4318	Tetralogy of Fallot	C0039685	disease	Congenital, Hereditary, and Neonatal Diseases and Abnormalities; Cardiovascular Diseases	Congenital Abnormality	274	83	0.02		1	2	0	2011	2019
MMP9	4318	Thrombocythemia, Essential	C0040028	disease	Hemic and Lymphatic Diseases	Disease or Syndrome	220	37	0.02		1	2	1	2015	2015
MMP9	4318	Vasculitis	C0042384	disease	Cardiovascular Diseases	Disease or Syndrome	294	24	0.02		0.5	2	0	2001	2014
MMP9	4318	Vitamin D Deficiency	C0042870	disease	Nutritional and Metabolic Diseases	Disease or Syndrome	153	37	0.02		1	2	1	2018	2019
MMP9	4318	Ichthyosis, X-Linked	C0079588	disease	Congenital, Hereditary, and Neonatal Diseases and Abnormalities; Nutritional and Metabolic Diseases; Skin and Connective Tissue Diseases	Disease or Syndrome	199	10	0.02		1	2	0	2000	2006
MMP9	4318	Peripheral Vascular Diseases	C0085096	group	Cardiovascular Diseases	Disease or Syndrome	150	18	0.02		1	2	0	2003	2014
MMP9	4318	Meningitis, Bacterial	C0085437	group	Infections; Nervous System Diseases	Disease or Syndrome	81	16	0.02		1	2	0	1999	2008
MMP9	4318	Essential Hypertension	C0085580	disease	Cardiovascular Diseases	Disease or Syndrome	445	293	0.02		1	2	0	2007	2012
MMP9	4318	Benign Neoplasm	C0086692	group	Neoplasms	Neoplastic Process	371	7	0.02		1	2	0	2000	2013
MMP9	4318	Spontaneous pneumothorax	C0149781	disease	Respiratory Tract Diseases	Disease or Syndrome	30	6	0.02		1	2	0	2017	2018
MMP9	4318	Squamous cell carcinoma of lung	C0149782	disease	Neoplasms; Respiratory Tract Diseases	Neoplastic Process	670	283	0.02		1	2	0	1994	2015
MMP9	4318	Secondary glaucoma	C0149893	disease	Pathological Conditions, Signs and Symptoms; Eye Diseases; Nervous System Diseases	Disease or Syndrome	21	2	0.02		1	2	0	2010	2019
MMP9	4318	Small cell carcinoma of lung	C0149925	disease	Neoplasms; Respiratory Tract Diseases	Neoplastic Process	972	125	0.02		1	2	0	2014	2015
MMP9	4318	Complete atrioventricular block	C0151517	disease	Pathological Conditions, Signs and Symptoms; Cardiovascular Diseases	Disease or Syndrome	403	96	0.02		1	2	0	2017	2018
MMP9	4318	Oral Cavity Carcinoma	C0151546	disease	Digestive System Diseases; Neoplasms; Stomatognathic Diseases	Neoplastic Process	167	16	0.02		1	2	0	2008	2008
MMP9	4318	Cutaneous Melanoma	C0151779	disease	Neoplasms; Skin and Connective Tissue Diseases	Neoplastic Process	507	248	0.02		1	2	0	2007	2017
MMP9	4318	Low Tension Glaucoma	C0152136	disease	Eye Diseases	Disease or Syndrome	103	56	0.02		1	2	1	2004	2018
MMP9	4318	Linear atrophy	C0152459	disease	Pathological Conditions, Signs and Symptoms	Acquired Abnormality	149	6	0.02		1	2	0	2017	2019
MMP9	4318	Cicatrix, Hypertrophic	C0162810	disease	Pathological Conditions, Signs and Symptoms	Acquired Abnormality	185	3	0.02		1	2	0	2013	2015
MMP9	4318	Follicular adenoma	C0205647	disease	Neoplasms	Neoplastic Process	183	5	0.02		1	2	0	2006	2012
MMP9	4318	Exfoliation Syndrome	C0206368	disease	Eye Diseases	Disease or Syndrome	94	74	0.02		1	2	1	2010	2017
MMP9	4318	Adenomatous Polyps	C0206677	disease	Neoplasms	Neoplastic Process	120	20	0.02		1	2	0	2003	2007
MMP9	4318	Follicular thyroid carcinoma	C0206682	disease	Neoplasms	Neoplastic Process	293	28	0.02		1	2	0	2007	2012
MMP9	4318	Childhood Rhabdomyosarcoma	C0220611	disease	Neoplasms	Neoplastic Process	517	12	0.02		1	2	0	2013	2014
MMP9	4318	Adult Liver Carcinoma	C0220630	disease	Digestive System Diseases; Neoplasms	Neoplastic Process	1377	72	0.02		1	2	0	2011	2014
MMP9	4318	Malignant neoplasm of salivary gland	C0220636	disease	Neoplasms; Stomatognathic Diseases	Neoplastic Process	91	0	0.02		1	2	0	2008	2016
MMP9	4318	Congenital contractural arachnodactyly	C0220668	disease	Congenital, Hereditary, and Neonatal Diseases and Abnormalities; Musculoskeletal Diseases	Congenital Abnormality	559	48	0.02		1	2	0	2011	2019
MMP9	4318	Mental deterioration	C0234985	phenotype	Mental Disorders	Mental or Behavioral Dysfunction	508	121	0.02		1	2	0	2017	2018
MMP9	4318	Colitis, Collagenous	C0238067	disease	Digestive System Diseases	Disease or Syndrome	21	2	0.02		1	2	0	2011	2012
MMP9	4318	Gastrointestinal Stromal Tumors	C0238198	group	Digestive System Diseases; Neoplasms	Neoplastic Process	538	154	0.02		1	2	0	2012	2018
MMP9	4318	Malignant Meningioma	C0259785	disease	Neoplasms; Nervous System Diseases	Neoplastic Process	49	0	0.02		1	2	0	2007	2007
MMP9	4318	Erythroblastosis	C0272138	disease		Disease or Syndrome	89	0	0.02		1	2	0	2017	2018
MMP9	4318	Gastric Adenocarcinoma	C0278701	disease	Digestive System Diseases; Neoplasms	Neoplastic Process	453	235	0.02		1	2	0	2010	2014
MMP9	4318	Liver and Intrahepatic Biliary Tract Carcinoma	C0279000	disease	Digestive System Diseases; Neoplasms	Neoplastic Process	1395	73	0.02		1	2	0	2011	2014
MMP9	4318	Childhood Solid Neoplasm	C0279068	phenotype		Neoplastic Process	169	3	0.02		1	2	0	2013	2019
MMP9	4318	Adult Rhabdomyosarcoma	C0279550	disease	Neoplasms	Neoplastic Process	509	12	0.02		1	2	0	2013	2014
MMP9	4318	Childhood Hepatocellular Carcinoma	C0279606	disease	Digestive System Diseases; Neoplasms	Neoplastic Process	146	17	0.02		1	2	0	2014	2017
MMP9	4318	Adult Hepatocellular Carcinoma	C0279607	disease	Digestive System Diseases; Neoplasms	Neoplastic Process	150	14	0.02		1	2	0	2014	2017
MMP9	4318	Adenocarcinoma Of Esophagus	C0279628	disease	Digestive System Diseases; Neoplasms	Neoplastic Process	468	81	0.02		1	2	0	2013	2015
MMP9	4318	Cervical Squamous Cell Carcinoma	C0279671	disease	Neoplasms; Female Urogenital Diseases and Pregnancy Complications	Neoplastic Process	371	44	0.02		1	2	0	2005	2009
MMP9	4318	Adult Solid Neoplasm	C0280099	group		Neoplastic Process	163	3	0.02		1	2	0	2013	2019
MMP9	4318	Prolapsed lumbar disc	C0281899	disease	Pathological Conditions, Signs and Symptoms; Musculoskeletal Diseases	Acquired Abnormality	75	33	0.02		1	2	3	2008	2018
MMP9	4318	Superficial ulcer	C0333307	disease	Pathological Conditions, Signs and Symptoms	Acquired Abnormality	242	10	0.02		1	2	0	2002	2018
MMP9	4318	Squamous intraepithelial lesion	C0333873	phenotype	Pathological Conditions, Signs and Symptoms; Neoplasms; Female Urogenital Diseases and Pregnancy Complications	Neoplastic Process	73	8	0.02		1	2	0	2014	2017
MMP9	4318	Frontotemporal dementia	C0338451	disease	Nutritional and Metabolic Diseases; Nervous System Diseases; Mental Disorders	Disease or Syndrome	320	215	0.02		1	2	0	2016	2018
MMP9	4318	Thyroid associated opthalmopathies	C0339143	disease	Congenital, Hereditary, and Neonatal Diseases and Abnormalities; Eye Diseases; Immune System Diseases; Endocrine System Diseases	Disease or Syndrome	211	49	0.02		1	2	0	2012	2018
MMP9	4318	Anterior myocardial infarction	C0340293	disease	Pathological Conditions, Signs and Symptoms; Cardiovascular Diseases	Disease or Syndrome	47	3	0.02		1	2	0	2017	2017
MMP9	4318	Intrahepatic Cholangiocarcinoma	C0345905	disease	Neoplasms	Neoplastic Process	470	19	0.02		1	2	0	2015	2019
MMP9	4318	Nephrolithiasis	C0392525	disease	Female Urogenital Diseases and Pregnancy Complications; Male Urogenital Diseases	Disease or Syndrome	242	99	0.02		1	2	1	2017	2018
MMP9	4318	Osteoarthritis, Knee	C0409959	disease	Musculoskeletal Diseases	Disease or Syndrome	368	150	0.02		1	2	2	2007	2009
MMP9	4318	Lupus Erythematosus	C0409974	disease	Pathological Conditions, Signs and Symptoms; Skin and Connective Tissue Diseases; Immune System Diseases	Disease or Syndrome	558	44	0.02		1	2	0	2015	2016
MMP9	4318	Hyperactive behavior	C0424295	phenotype	Pathological Conditions, Signs and Symptoms; Nervous System Diseases	Mental or Behavioral Dysfunction	1263	112	0.02		1	2	0	2015	2017
MMP9	4318	Neuropathy	C0442874	group	Nervous System Diseases	Disease or Syndrome	484	110	0.02		1	2	0	1999	2018
MMP9	4318	Dementia	C0497327	disease	Nervous System Diseases; Mental Disorders	Mental or Behavioral Dysfunction	816	176	0.02		1	2	0	2003	2018
MMP9	4318	Neurodegenerative Disorders	C0524851	group	Nervous System Diseases	Disease or Syndrome	1515	85	0.02		1	2	0	2017	2018
MMP9	4318	Hepatitis C, Chronic	C0524910	disease	Digestive System Diseases; Infections	Disease or Syndrome	430	80	0.02		1	2	0	2003	2013
MMP9	4318	Ewings sarcoma	C0553580	disease	Neoplasms	Neoplastic Process	517	25	0.02		1	2	0	2017	2018
MMP9	4318	Oropharyngeal disorders	C0553694	group	Digestive System Diseases; Respiratory Tract Diseases; Stomatognathic Diseases; Otorhinolaryngologic Diseases	Disease or Syndrome	163	3	0.02		1	2	0	2002	2014
MMP9	4318	Squamous cell carcinoma of skin	C0553723	disease	Neoplasms; Skin and Connective Tissue Diseases	Neoplastic Process	458	92	0.02		1	2	0	2018	2018
MMP9	4318	Dissecting aneurysm of the thoracic aorta	C0729233	disease	Cardiovascular Diseases	Disease or Syndrome	57	3	0.02		1	2	0	2014	2017
MMP9	4318	cardiac event	C0741923	phenotype		Disease or Syndrome	82	18	0.02		1	2	1	2013	2018
MMP9	4318	early pregnancy	C0747845	phenotype		Disease or Syndrome	273	8	0.02		0.5	2	0	2012	2014
MMP9	4318	Malignant Squamous Cell Neoplasm	C0751688	disease	Neoplasms	Neoplastic Process	193	12	0.02		1	2	0	2004	2006
MMP9	4318	Brain Infarction	C0751955	disease	Pathological Conditions, Signs and Symptoms; Nervous System Diseases; Cardiovascular Diseases	Disease or Syndrome	114	11	0.02		1	2	0	2018	2019
MMP9	4318	Multiple Sclerosis, Relapsing-Remitting	C0751967	disease	Immune System Diseases; Nervous System Diseases	Disease or Syndrome	206	7	0.02		1	2	0	2004	2019
MMP9	4318	Asthma chronic	C0877430	disease		Disease or Syndrome	36	0	0.02		1	2	0	2017	2019
MMP9	4318	Conjunctivochalasis	C0878693	disease	Eye Diseases	Disease or Syndrome	9	0	0.02		0.5	2	0	2000	2000
MMP9	4318	Metastatic Prostate Carcinoma	C0936223	disease	Neoplasms; Male Urogenital Diseases	Neoplastic Process	362	24	0.02		1	2	0	2018	2020
MMP9	4318	Macroangiopathy	C1096293	disease		Disease or Syndrome	31	6	0.02		1	2	0	2010	2019
MMP9	4318	High-Grade Prostatic Intraepithelial Neoplasia	C1168327	disease	Neoplasms; Male Urogenital Diseases	Neoplastic Process	111	0	0.02		1	2	0	2017	2017
MMP9	4318	Meibomian gland dysfunction	C1275684	disease	Eye Diseases; Skin and Connective Tissue Diseases	Disease or Syndrome	23	0	0.02		1	2	0	2015	2018
MMP9	4318	Metastasis from malignant tumor of prostate	C1282496	disease		Neoplastic Process	342	18	0.02		1	2	0	2018	2020
MMP9	4318	Liver regeneration disorder	C1318485	phenotype	Digestive System Diseases	Disease or Syndrome	346	0	0.02		1	2	0	2015	2019
MMP9	4318	Epithelioma	C1368683	disease	Neoplasms	Neoplastic Process	326	2	0.02		1	2	0	2000	2012
MMP9	4318	Myocardial necrosis	C1442837	disease	Cardiovascular Diseases	Disease or Syndrome	30	2	0.02		1	2	0	2017	2019
MMP9	4318	Autism Spectrum Disorders	C1510586	disease	Mental Disorders	Mental or Behavioral Dysfunction	1071	331	0.02		1	2	0	2017	2018
MMP9	4318	Angiogenic Switch	C1510885	disease		Neoplastic Process	96	3	0.02		1	2	0	2004	2007
MMP9	4318	Ductal Breast Carcinoma	C1527349	disease	Neoplasms	Neoplastic Process	196	10	0.02		1	2	0	2013	2019
MMP9	4318	Cardioembolic stroke	C1531624	disease		Disease or Syndrome	42	28	0.02		1	2	0	2019	2019
MMP9	4318	Geographic Atrophy	C1536085	disease	Eye Diseases	Disease or Syndrome	85	81	0.02		1	2	0	2018	2019
MMP9	4318	Latent Tuberculosis	C1609538	disease	Infections	Disease or Syndrome	183	18	0.02		1	2	0	2019	2019
[truncated: 660 more rows]

## Sheet: CCR5
Gene	Gene_id	Disease	Disease_id	Type	Disease_Class	Semantic_Type	N_genes_d	N_SNPs_d	Score_gda	EL_gda	EI_gda	N_PMIDs	N_SNPs_gda	First_Ref	Last_Ref
[truncated: 508 more rows]

[truncated: 43 more sheets: SELL, FCGR1A, TLR3, IL18, BRCA1, BUB1, CCNA2, CCNB2, CDC20, CENPA, CHEK1, EXO1, KIF20A, MKI67, TOP2A, AURKA, CCNB1, CDK1, KIF11, MAD2L1 …]
